# Supplementary material for: Polystyrene micro- and nanoplastics in a colitis mouse model – effects on biodistribution, macrophage polarization, and gut microbiome
Source: Research Square preprint supplement (doi:10.21203/rs.3.rs-7175706/v1), 2025-08-29
Supplement: Supplementary file 1 [file 243c15ded0e2fb5f30d69557.xlsx]

## Sheet: Description
	Supplementary data 1: Unbiased proteome profiling of colonic FFPE-tissue
	sheet 01_ Venn of protein identifications and mean (lg2)+/- standard deviation abundance levels after filtering for at least 3 valid values
	sheet 02_Venn of CellType-categories in each group (ctrl, MNP, DSS, DSS+MNP)
	sheet 03_ Heatmap of mean proteins abundance levels
	sheet 04a-f_Source data for Heatmap clusters, enrichments and profile plots
	Literature used to assess cell type signatures indicated in the Heatmap
	Duguet, Fanny, Marie Locard-Paulet, Marlène Marcellin, Karima Chaoui, Isabelle Bernard, Olivier Andreoletti, Renaud Lesourne, Odile Burlet-Schiltz, Anne Gonzalez de Peredo, and Abdelhadi Saoudi. 2017. “Proteomic Analysis of Regulatory T Cells Reveals the Importance of Themis1 in the Control of Their Suppressive Function.” Molecular & Cellular Proteomics : MCP 16 (8): 1416–32. https://doi.org/10.1…
	Orecchioni, Marco, Yanal Ghosheh, Akula Bala Pramod, and Klaus Ley. 2019. “Macrophage Polarization: Different Gene Signatures in M1(LPS+) vs. Classically and M2(LPS-) vs. Alternatively Activated Macrophages.” Frontiers in Immunology 10:1084. https://doi.org/10.3389/fimmu.2019.01084.
	Yin, Jie, Ziming Zhao, Jianzheng Huang, Yang Xiao, Mewlude Rehmutulla, Biqiong Zhang, Zijun Zhang, Ming Xiang, Qingyi Tong, and Yonghui Zhang. 2023. “Single-Cell Transcriptomics Reveals Intestinal Cell Heterogeneity and Identifies Ep300 as a Potential Therapeutic Target in Mice with Acute Liver Failure.” Cell Discovery 9 (1): 1–23. https://doi.org/10.1038/s41421-023-00578-4.

## Sheet: 01_Venn-all4
Proteins Ctrl (5288)									Proteins MNP (5072)									Proteins DSS (6148)									Proteins DSS+MNP (4568)															52 proteins Ctrl only					43 Proteins MNP only
Protein.Group	Genes	First.Protein.Description	Gene	Ctrl	stddev Ctrl	ALL M1	ALL M2	cluster-296	Protein.Group	Genes	First.Protein.Description	Gene	MNP	stddev MNP	ALL M1	ALL M2	cluster-296	Protein.Group	Genes	First.Protein.Description	Gene	DSS	stddev DSS	ALL M1	ALL M2		Protein.Group	Genes	First.Protein.Description	Gene	DSSMNP	stddev DSSMNP	ALL M1	ALL M2								Protein.Group	Genes	First.Protein.Description	Gene		Protein.Group	Genes	First.Protein.Description
A0A286YCV9	Kif13b	Kinesin family member 13B	Kif13b	21.0419	0.47778	+		Aacs	Q9D2R0	Aacs	Acetoacetyl-CoA synthetase	Aacs	21.4352	0.455755			Aacs	Q9D2R0	Aacs	Acetoacetyl-CoA synthetase	Aacs	22.0974	0.611145				A0A286YCV9	Kif13b	Kinesin family member 13B	Kif13b	20.4049	0.96207	+									A0A075B5S2	Ighv7-1	Uncharacterized protein (Fragment)	Ighv7-1		E9Q3H6	Coq10a	Coenzyme Q10A
A2ASQ1	Agrn	Agrin	Agrn	19.9444	0.7499	+		Abcd3	P55096	Abcd3	ATP-binding cassette sub-family D member 3	Abcd3	20.6908	0.419686			Aatf	Q9JKX4	Aatf	Protein AATF	Aatf	17.5128	0.706802				A2ASQ1	Agrn	Agrin	Agrn	19.4808	0.700123	+									A0A075B5T2	Ighv6-3	Immunoglobulin heavy variable 6-3 (Fragment)	Ighv6-3		F8VPQ6	Alpi	Alkaline phosphatase
E9Q236	Abcc4	ATP-binding cassette, sub-family C (CFTR/MRP), member 4	Abcc4	17.973	0.457003	+		Acox1	Q9R0H0	Acox1	Peroxisomal acyl-coenzyme A oxidase 1	Acox1	20.1313	1.1933			Abcd3	P55096	Abcd3	ATP-binding cassette sub-family D member 3	Abcd3	20.4315	0.332055				E9Q236	Abcc4	ATP-binding cassette, sub-family C (CFTR/MRP), member 4	Abcc4	18.3696	0.396778	+									A0A140T8P6	Igkv12-46	Immunoglobulin kappa variable 12-46 (Fragment)	Igkv12-46		H3BJD6	Ppp1r9a	Protein phosphatase 1, regulatory subunit 9A
E9QAM5	Helz2	Helicase with zinc finger domain 2	Helz2	18.2695	0.414074	+		Acp5	Q05117	Acp5	Tartrate-resistant acid phosphatase type 5	Acp5	19.5389	0.854632	+		Acox1	Q9R0H0	Acox1	Peroxisomal acyl-coenzyme A oxidase 1	Acox1	19.2207	0.796835				E9QAM5	Helz2	Helicase with zinc finger domain 2	Helz2	18.5341	0.484384	+									A2ARJ3	Tmem236	Transmembrane protein 236	Tmem236		O88310	Itln1	Intelectin-1a
O08528	Hk2	Hexokinase-2	Hk2	21.9214	0.341135	+		Acsl4	Q9QUJ7	Acsl4	Long-chain-fatty-acid--CoA ligase 4	Acsl4	18.3627	1.10746			Acp5	Q05117	Acp5	Tartrate-resistant acid phosphatase type 5	Acp5	20.1989	0.660511	+			O08528	Hk2	Hexokinase-2	Hk2	21.6469	0.478897	+									A2RTL5	Rsrc2	Arginine/serine-rich coiled-coil protein 2	Rsrc2		P01644;P01645;P01646;P01647;P01648;P04946	KV5AB_MOUSE	Ig kappa chain V-V region HP R16.7
O08784	Tcof1	Treacle protein	Tcof1	20.0979	0.421177	+		Actbl2	Q8BFZ3	Actbl2	Beta-actin-like protein 2	Actbl2	27.9333	2.73261			Acsl4	Q9QUJ7	Acsl4	Long-chain-fatty-acid--CoA ligase 4	Acsl4	18.5825	0.715184				O08784	Tcof1	Treacle protein	Tcof1	20.4524	0.528465	+									A6H619	Phrf1	PHD and RING finger domain-containing protein 1	Phrf1		P14432	H2-T3	H-2 class I histocompatibility antigen, TLA(B) alpha chain
O35309	Nmi	N-myc-interactor	Nmi	19.3508	0.170588	+		Afdn	Q9QZQ1	Afdn	Afadin	Afdn	21.3024	0.243361			Actbl2	Q8BFZ3	Actbl2	Beta-actin-like protein 2	Actbl2	27.5412	2.65619				O35309	Nmi	N-myc-interactor	Nmi	19.3986	0.311487	+									B1AR13	Cisd3	CDGSH iron-sulfur domain-containing protein 3, mitochondrial	Cisd3		P28663	Napb	Beta-soluble NSF attachment protein
O35344	Kpna3	Importin subunit alpha-4	Kpna3	19.3322	0.402713	+		Agpat4	Q8K4X7	Agpat4	1-acyl-sn-glycerol-3-phosphate acyltransferase delta	Agpat4	19.0399	0.530045			Afdn	Q9QZQ1	Afdn	Afadin	Afdn	21.1611	0.189009				O35344	Kpna3	Importin subunit alpha-4	Kpna3	19.2809	0.328712	+									E0CZ42	Fer1l6	Fer-1-like 6 (C. elegans)	Fer1l6		P33680	Guca2a	Guanylin
O35657	Neu1	Sialidase-1	Neu1	20.2947	0.929432	+		Ahsa1	Q8BK64	Ahsa1	Activator of 90 kDa heat shock protein ATPase homolog 1	Ahsa1	21.5585	0.667301			Agpat4	Q8K4X7	Agpat4	1-acyl-sn-glycerol-3-phosphate acyltransferase delta	Agpat4	18.3838	0.737169				O35657	Neu1	Sialidase-1	Neu1	19.873	0.629306	+									E9Q438	Olfr749	Olfactory receptor	Olfr749		P52795	Efnb1	Ephrin-B1
O35892	Sp100	Nuclear autoantigen Sp-100	Sp100	19.0132	0.76144	+		Aldh16a1	Q571I9	Aldh16a1	Aldehyde dehydrogenase family 16 member A1	Aldh16a1	20.5058	0.341951			Ahsa1	Q8BK64	Ahsa1	Activator of 90 kDa heat shock protein ATPase homolog 1	Ahsa1	21.5516	0.239775				O35892	Sp100	Nuclear autoantigen Sp-100	Sp100	20.4564	1.49614	+									E9QAN8	Pik3c2b	Phosphatidylinositol-4-phosphate 3-kinase catalytic subunit type 2 beta	Pik3c2b		P70257	Nfix	Nuclear factor 1 X-type
O35954	Pitpnm1	Membrane-associated phosphatidylinositol transfer protein 1	Pitpnm1	17.8937	0.600821	+		Ankfy1	Q810B6	Ankfy1	Rabankyrin-5	Ankfy1	19.5429	0.743318			Aif1	O70200	Aif1	Allograft inflammatory factor 1	Aif1	20.1503	0.603831				O35954	Pitpnm1	Membrane-associated phosphatidylinositol transfer protein 1	Pitpnm1	17.8764	0.307991	+									G3X9G9	Mettl7a3	MCG123521, isoform CRA_a	Mettl7a3		Protein.Group	Genes	First.Protein.Description
O35955	Psmb10	Proteasome subunit beta type-10	Psmb10	21.2948	0.487826	+		Ap2s1	P62743	Ap2s1	AP-2 complex subunit sigma	Ap2s1	21.2556	0.426737			Aldh16a1	Q571I9	Aldh16a1	Aldehyde dehydrogenase family 16 member A1	Aldh16a1	20.611	0.291541				O35955	Psmb10	Proteasome subunit beta type-10	Psmb10	22.0446	0.647451	+									K7N6C2	Cyp2c68	Cytochrome P450, family 2, subfamily c, polypeptide 68	Cyp2c68		Q01721	Gas1	Growth arrest-specific protein 1
O54901	Cd200	OX-2 membrane glycoprotein	Cd200	18.2665	0.42591	+		Apex1	P28352	Apex1	DNA-(apurinic or apyrimidinic site) lyase	Apex1	21.9361	0.367009		+	Ankfy1	Q810B6	Ankfy1	Rabankyrin-5	Ankfy1	19.782	0.30896				O54901	Cd200	OX-2 membrane glycoprotein	Cd200	18.5342	1.57432	+									O35660	Gstm6	Glutathione S-transferase Mu 6	Gstm6		Q3KNM2	Marchf5	E3 ubiquitin-protein ligase MARCH5
O55135	Eif6	Eukaryotic translation initiation factor 6	Eif6	23.1801	0.279639	+		Arfgef1	G3X9K3	Arfgef1	Brefeldin A-inhibited guanine nucleotide-exchange protein 1	Arfgef1	19.6378	0.351956			Ap2s1	P62743	Ap2s1	AP-2 complex subunit sigma	Ap2s1	20.9669	0.278812				O55135	Eif6	Eukaryotic translation initiation factor 6	Eif6	22.9792	0.65329	+									P01660	KV3A8_MOUSE	Ig kappa chain V-III region PC 3741/TEPC 111	KV3A8_MOUSE		Q3TYD6	Lmtk2	Serine/threonine-protein kinase LMTK2
O70622	Rtn2	Reticulon-2	Rtn2	19.0637	0.620972	+		Arglu1	Q3UL36	Arglu1	Arginine and glutamate-rich protein 1	Arglu1	21.3941	0.601533			Apex1	P28352	Apex1	DNA-(apurinic or apyrimidinic site) lyase	Apex1	21.942	0.301099		+		O88792	F11r	Junctional adhesion molecule A	F11r	21.0282	1.26972	+									P06797	Ctsl	Cathepsin L1	Ctsl		Q3U3C9	Gse1	Genetic suppressor element 1
O88792	F11r	Junctional adhesion molecule A	F11r	21.2885	0.425171	+		Arhgef18	Q6P9R4	Arhgef18	Rho guanine nucleotide exchange factor 18	Arhgef18	18.3964	0.917572			Arfgef1	G3X9K3	Arfgef1	Brefeldin A-inhibited guanine nucleotide-exchange protein 1	Arfgef1	19.2757	0.394023				O89001	Cpd	Carboxypeptidase D	Cpd	19.1783	0.978005	+									P11152	Lpl	Lipoprotein lipase	Lpl		Q5JCT0	Gcnt3	Beta-1,3-galactosyl-O-glycosyl-glycoprotein beta-1,6-N-acetylglucosaminyltransferase 3
O89001	Cpd	Carboxypeptidase D	Cpd	19.0824	0.353385	+		Arhgef5	E9Q7D5	Arhgef5	Rho guanine nucleotide exchange factor 5	Arhgef5	18.8298	0.440329			Arglu1	Q3UL36	Arglu1	Arginine and glutamate-rich protein 1	Arglu1	21.5923	0.461998				O89116	Vti1a	Vesicle transport through interaction with t-SNAREs homolog 1A	Vti1a	18.67	1.29681	+									P24456	Cyp2d10	Cytochrome P450 2D10	Cyp2d10		Q61271	Acvr1b	Activin receptor type-1B
O89116	Vti1a	Vesicle transport through interaction with t-SNAREs homolog 1A	Vti1a	17.6894	0.596621	+		Arih1	Q9Z1K5	Arih1	E3 ubiquitin-protein ligase ARIH1	Arih1	18.5997	0.83839		+	Arhgef18	Q6P9R4	Arhgef18	Rho guanine nucleotide exchange factor 18	Arhgef18	17.8609	0.607323				P01901	H2-K1	H-2 class I histocompatibility antigen, K-B alpha chain	H2-K1	22.8064	1.21643	+									P43274	Hist1h1e	Histone H1.4	Hist1h1e		Q61337	Bad	Bcl2-associated agonist of cell death
P01901	H2-K1	H-2 class I histocompatibility antigen, K-B alpha chain	H2-K1	21.7411	0.254425	+		Asl	Q91YI0	Asl	Argininosuccinate lyase	Asl	20.6794	0.311797			Arhgef5	E9Q7D5	Arhgef5	Rho guanine nucleotide exchange factor 5	Arhgef5	18.5107	0.637138				P04186	Cfb	Complement factor B	Cfb	19.8211	1.39528	+									P52927	Hmga2	High mobility group protein HMGI-C	Hmga2		Q61609	Slc20a1	Sodium-dependent phosphate transporter 1
P04186	Cfb	Complement factor B	Cfb	19.0147	0.674122	+		Atp6ap2	Q9CYN9	Atp6ap2	Renin receptor	Atp6ap2	19.9031	0.449256			Arih1	Q9Z1K5	Arih1	E3 ubiquitin-protein ligase ARIH1	Arih1	18.7376	0.494949		+		P04918	Saa3	Serum amyloid A-3 protein	Saa3	19.7871	2.36323	+									P97411	Ica1	Islet cell autoantigen 1	Ica1		Q64GA5	Pla2g4c	Cytosolic phospholipase A2 gamma
P05480	Src	Neuronal proto-oncogene tyrosine-protein kinase Src	Src	20.9799	0.394173	+		Atp6v1h	Q8BVE3	Atp6v1h	V-type proton ATPase subunit H	Atp6v1h	19.917	0.421046			Asl	Q91YI0	Asl	Argininosuccinate lyase	Asl	20.6065	0.255379				P05480	Src	Neuronal proto-oncogene tyrosine-protein kinase Src	Src	21.0843	0.42288	+									P97816	S100g	Protein S100-G	S100g		Q69ZX6	Morc2a	MORC family CW-type zinc finger protein 2A
P05622	Pdgfrb	Platelet-derived growth factor receptor beta	Pdgfrb	18.3352	0.912969	+		Aup1	P70295	Aup1	Ancient ubiquitous protein 1	Aup1	19.7818	0.584157			Atp6ap2	Q9CYN9	Atp6ap2	Renin receptor	Atp6ap2	19.974	0.1847				P06801	Me1	NADP-dependent malic enzyme	Me1	21.1716	0.326024	+									Protein.Group	Genes	First.Protein.Description	Gene		Q6PDG8	Mon1a	Vacuolar fusion protein MON1 homolog A
P06801	Me1	NADP-dependent malic enzyme	Me1	21.2561	1.03464	+		Bak1	O08734	Bak1	Bcl-2 homologous antagonist/killer	Bak1	19.1017	0.877668			Atp6v0a2	P15920	Atp6v0a2	V-type proton ATPase 116 kDa subunit a isoform 2	Atp6v0a2	18.7997	0.577828				P08103	Hck	Tyrosine-protein kinase HCK	Hck	20.8723	0.239413	+									Q5DTY9	Kctd16	BTB/POZ domain-containing protein KCTD16	Kctd16		Q80TS8	Sel1l3	Protein sel-1 homolog 3
P08103	Hck	Tyrosine-protein kinase HCK	Hck	20.8598	0.463976	+		Bet1l	O35153	Bet1l	BET1-like protein	Bet1l	18.8424	1.33355			Atp6v1h	Q8BVE3	Atp6v1h	V-type proton ATPase subunit H	Atp6v1h	19.5183	0.301132				P08122	Col4a2	Collagen alpha-2(IV) chain	Col4a2	23.9651	0.600058	+									Q5FW60	Mup20	Major urinary protein 20	Mup20		Q80UQ2	Rassf6	Ras association domain-containing protein 6
P08122	Col4a2	Collagen alpha-2(IV) chain	Col4a2	23.881	0.527889	+		Bod1l	E9Q6J5	Bod1l	Biorientation of chromosomes in cell division protein 1-like 1	Bod1l	17.8127	0.234876			Aup1	P70295	Aup1	Ancient ubiquitous protein 1	Aup1	19.9872	0.621044				P09450	Junb	Transcription factor jun-B	Junb	17.2781	1.88954	+									Q60793	Klf4	Krueppel-like factor 4	Klf4		Q8BFU3	Rnf214	RING finger protein 214
P09671	Sod2	Superoxide dismutase [Mn], mitochondrial	Sod2	21.6664	0.66362	+		Bola2	Q8BGS2	Bola2	BolA-like protein 2	Bola2	21.4907	0.638482			B4galnt1	Q09200	B4galnt1	Beta-1,4 N-acetylgalactosaminyltransferase 1	B4galnt1	18.2905	0.710547		+		P09671	Sod2	Superoxide dismutase [Mn], mitochondrial	Sod2	21.7809	0.588748	+									Q61526	Erbb3	Receptor tyrosine-protein kinase erbB-3	Erbb3		Q8BK84	Dupd1	Dual specificity phosphatase DUPD1
P10852	Slc3a2	4F2 cell-surface antigen heavy chain	Slc3a2	21.5448	0.223257	+		Btf3l4	Q9CQH7	Btf3l4	Transcription factor BTF3 homolog 4	Btf3l4	22.0074	0.608154			Bak1	O08734	Bak1	Bcl-2 homologous antagonist/killer	Bak1	19.055	0.411598				P10852	Slc3a2	4F2 cell-surface antigen heavy chain	Slc3a2	22.0724	0.352024	+									Q64691	Capn3	Calpain-3	Capn3		Q8BM26	9530003J23Rik	Lysozyme
P11404	Fabp3	Fatty acid-binding protein, heart	Fabp3	21.9338	0.535186	+		Ca13	Q9D6N1	Ca13	Carbonic anhydrase 13	Ca13	18.9749	0.456802			Bet1l	O35153	Bet1l	BET1-like protein	Bet1l	17.9172	0.72249				P11404	Fabp3	Fatty acid-binding protein, heart	Fabp3	21.3313	1.48564	+									Q6P5G3	Mbtd1	MBT domain-containing protein 1	Mbtd1		Q8C0R0	Usp37	Ubiquitin carboxyl-terminal hydrolase 37
P11688	Itga5	Integrin alpha-5	Itga5	23.0786	0.457488	+		Cap1	P40124	Cap1	Adenylyl cyclase-associated protein 1	Cap1	21.976	0.344093			Bin2	D3Z6Q9	Bin2	Bridging integrator 2	Bin2	18.388	0.876685				P11688	Itga5	Integrin alpha-5	Itga5	22.766	0.611311	+									Q8BH49	Pheta1	Sesquipedalian-1	Pheta1		Q8C102	Galnt5	Polypeptide N-acetylgalactosaminyltransferase 5
P12382	Pfkl	ATP-dependent 6-phosphofructokinase, liver type	Pfkl	20.3661	1.03827	+		Carm1	Q9WVG6	Carm1	Histone-arginine methyltransferase CARM1	Carm1	20.0823	0.299361			Bod1l	E9Q6J5	Bod1l	Biorientation of chromosomes in cell division protein 1-like 1	Bod1l	17.9179	0.259339				P12382	Pfkl	ATP-dependent 6-phosphofructokinase, liver type	Pfkl	19.8334	1.04696	+									Q8BJ83	Tm2d3	TM2 domain-containing protein 3	Tm2d3		Q8C1N8;Q8C1P2	Defa21;Defa22	Alpha-defensin 22
P12804	Fgl2	Fibroleukin	Fgl2	19.1461	0.237324	+		Cbs	Q91WT9	Cbs	Cystathionine beta-synthase	Cbs	20.4104	0.311141			Bola2	Q8BGS2	Bola2	BolA-like protein 2	Bola2	21.2772	0.36616				P12804	Fgl2	Fibroleukin	Fgl2	19.1565	0.69437	+									Q8BK75	Elp6	Elongator complex protein 6	Elp6		Q8C5K5	CX038_MOUSE	Uncharacterized protein CXorf38 homolog
P13597	Icam1	Intercellular adhesion molecule 1	Icam1	18.7227	0.405903	+		Ccdc51	Q3URS9	Ccdc51	Coiled-coil domain-containing protein 51	Ccdc51	19.0847	0.53742			Btf3l4	Q9CQH7	Btf3l4	Transcription factor BTF3 homolog 4	Btf3l4	21.4537	0.203747				P13597	Icam1	Intercellular adhesion molecule 1	Icam1	19.7692	1.30525	+									Q8BT51	COA4	Cytochrome c oxidase assembly factor 4 homolog, mitochondrial	COA4		Q8C7U7	Galnt6	Polypeptide N-acetylgalactosaminyltransferase 6
P15307	Rel	Proto-oncogene c-Rel	Rel	18.9399	0.286146	+		Cd109	Q8R422	Cd109	CD109 antigen	Cd109	19.3803	0.534031			C1sa	Q8CG14	C1sa	Complement C1s-A subcomponent	C1sa	18.9328	0.782309				P15307	Rel	Proto-oncogene c-Rel	Rel	19.4132	0.491398	+									Q8BTR5	Dusp28	Dual specificity phosphatase 28	Dusp28		Q8C9S8	Atg4a	Cysteine protease ATG4A
P17879	Hspa1b	Heat shock 70 kDa protein 1B	Hspa1b	23.8019	0.396914	+		Cd38	P56528	Cd38	ADP-ribosyl cyclase/cyclic ADP-ribose hydrolase 1	Cd38	19.444	0.443823	+		Ca13	Q9D6N1	Ca13	Carbonic anhydrase 13	Ca13	19.3782	0.338319				P17879	Hspa1b	Heat shock 70 kDa protein 1B	Hspa1b	23.2753	0.85814	+									Q8BUH8	Senp7	Sentrin-specific protease 7	Senp7		Q8QZY6	Tspan14	Tetraspanin-14
P20029	Hspa5	Endoplasmic reticulum chaperone BiP	Hspa5	25.5562	0.154689	+		Cdh11	P55288	Cdh11	Cadherin-11	Cdh11	18.2559	0.786066			Cap1	P40124	Cap1	Adenylyl cyclase-associated protein 1	Cap1	22.0774	0.0903175				P19123	Tnnc1	Troponin C, slow skeletal and cardiac muscles	Tnnc1	20.2831	2.18476	+									Q8BZH1	Tgm4	Protein-glutamine gamma-glutamyltransferase 4	Tgm4		Q99JN2	Klhl22	Kelch-like protein 22
P21958	Tap1	Antigen peptide transporter 1	Tap1	19.0937	0.877241	+		Cfdp1	O88271	Cfdp1	Craniofacial development protein 1	Cfdp1	19.2946	0.39677			Carm1	Q9WVG6	Carm1	Histone-arginine methyltransferase CARM1	Carm1	20.2343	0.268101				P20029	Hspa5	Endoplasmic reticulum chaperone BiP	Hspa5	26.0881	0.532626	+									Q8CGC4	Lsm14b	Protein LSM14 homolog B	Lsm14b		Q9CPT3	Nanp	N-acylneuraminate-9-phosphatase
P21981	Tgm2	Protein-glutamine gamma-glutamyltransferase 2	Tgm2	23.8177	0.357252	+		Chmp1b1	Q99LU0	Chmp1b1	Charged multivesicular body protein 1b-1	Chmp1b1	22.1751	0.160236			Cbs	Q91WT9	Cbs	Cystathionine beta-synthase	Cbs	20.4822	0.58202				P21958	Tap1	Antigen peptide transporter 1	Tap1	20.6666	0.977212	+									Q8JZZ7	Adgrl2	Adhesion G protein-coupled receptor L2	Adgrl2		Q9CPW7	Zmat2	Zinc finger matrin-type protein 2
P22366	Myd88	Myeloid differentiation primary response protein MyD88	Myd88	19.2967	0.384611	+		Chmp4b	Q9D8B3	Chmp4b	Charged multivesicular body protein 4b	Chmp4b	21.1858	0.546285			Ccdc51	Q3URS9	Ccdc51	Coiled-coil domain-containing protein 51	Ccdc51	18.6526	0.565305				P21981	Tgm2	Protein-glutamine gamma-glutamyltransferase 2	Tgm2	24.231	0.796248	+									Q8K3A0	Hscb	Iron-sulfur cluster co-chaperone protein HscB, mitochondrial	Hscb		Q9D142	Nudt14	Uridine diphosphate glucose pyrophosphatase
P24638	Acp2	Lysosomal acid phosphatase	Acp2	18.7393	0.232609	+		Chp1	P61022	Chp1	Calcineurin B homologous protein 1	Chp1	19.7316	0.880303			Cd109	Q8R422	Cd109	CD109 antigen	Cd109	19.2296	0.49113				P22366	Myd88	Myeloid differentiation primary response protein MyD88	Myd88	19.6816	0.500355	+									Q8R1T4	Slc35a3	UDP-N-acetylglucosamine transporter	Slc35a3		Q9D8X0	Manbal	Protein MANBAL
P25085	Il1rn	Interleukin-1 receptor antagonist protein	Il1rn	20.2432	0.196775	+		Ciao2a	Q9DCL2	Ciao2a	Cytosolic iron-sulfur assembly component 2A	Ciao2a	18.0015	0.767396			Cd38	P56528	Cd38	ADP-ribosyl cyclase/cyclic ADP-ribose hydrolase 1	Cd38	19.3359	0.832873	+			P24063	Itgal	Integrin alpha-L	Itgal	19.5427	1.4273	+									Q8R2K1	Fuom	Fucose mutarotase	Fuom		Q9DAI2	Ift22	Intraflagellar transport protein 22 homolog
P25799	Nfkb1	Nuclear factor NF-kappa-B p105 subunit	Nfkb1	19.5643	0.302632	+		Clptm1	Q8VBZ3	Clptm1	Cleft lip and palate transmembrane protein 1 homolog	Clptm1	18.7939	0.520506			Cdh11	P55288	Cdh11	Cadherin-11	Cdh11	18.2366	0.778653				P24638	Acp2	Lysosomal acid phosphatase	Acp2	17.8929	1.00757	+									Q8VDS3	Cbx7	Chromobox protein homolog 7	Cbx7		Q9DCN1	Nudt12	Peroxisomal NADH pyrophosphatase NUDT12
P26645	Marcks	Myristoylated alanine-rich C-kinase substrate	Marcks	21.02	0.898886	+		Clu	Q06890	Clu	Clusterin	Clu	19.0296	0.662781			Cfdp1	O88271	Cfdp1	Craniofacial development protein 1	Cfdp1	19.6626	0.535403				P25085	Il1rn	Interleukin-1 receptor antagonist protein	Il1rn	19.9261	0.672789	+									Q91W52	Tmem19	Transmembrane protein 19	Tmem19		Q9ERU3	Znf22	Zinc finger protein 22
P27870	Vav1	Proto-oncogene vav	Vav1	18.8032	0.96536	+		Cluh	Q5SW19	Cluh	Clustered mitochondria protein homolog	Cluh	21.1292	0.27312		+	Chmp1b1	Q99LU0	Chmp1b1	Charged multivesicular body protein 1b-1	Chmp1b1	21.8927	0.204171				P25799	Nfkb1	Nuclear factor NF-kappa-B p105 subunit	Nfkb1	19.7475	0.49506	+									Q99PN3	Trim26	Tripartite motif-containing protein 26	Trim26		Q9R257	Hebp1	Heme-binding protein 1
P28063	Psmb8	Proteasome subunit beta type-8	Psmb8	20.1066	0.358084	+		Cmtr1	Q9DBC3	Cmtr1	Cap-specific mRNA (nucleoside-2'-O-)-methyltransferase 1	Cmtr1	19.7922	0.441761	+		Chmp4b	Q9D8B3	Chmp4b	Charged multivesicular body protein 4b	Chmp4b	21.1811	0.365352				P26645	Marcks	Myristoylated alanine-rich C-kinase substrate	Marcks	21.858	0.975402	+									Q9CQV7	Dnajc19	Mitochondrial import inner membrane translocase subunit TIM14	Dnajc19		Q9Z2D3	Gsdme	Gasdermin-E
P28076	Psmb9	Proteasome subunit beta type-9	Psmb9	20.5506	0.625922	+		Cnot10	Q8BH15	Cnot10	CCR4-NOT transcription complex subunit 10	Cnot10	18.3374	0.84559			Chp1	P61022	Chp1	Calcineurin B homologous protein 1	Chp1	19.5242	0.287338				P27870	Vav1	Proto-oncogene vav	Vav1	20.7129	0.708151	+									Q9CR24	Nudt8	Nucleoside diphosphate-linked moiety X motif 8	Nudt8
P28654	Dcn	Decorin	Dcn	21.6252	0.826412	+		Cog1	Q9Z160	Cog1	Conserved oligomeric Golgi complex subunit 1	Cog1	19.4484	0.460532			Ciao2a	Q9DCL2	Ciao2a	Cytosolic iron-sulfur assembly component 2A	Ciao2a	18.5541	0.53633				P28063	Psmb8	Proteasome subunit beta type-8	Psmb8	20.8508	1.22136	+									Q9CZN8	Qrsl1	Glutamyl-tRNA(Gln) amidotransferase subunit A, mitochondrial	Qrsl1
P31324	Prkar2b	cAMP-dependent protein kinase type II-beta regulatory subunit	Prkar2b	19.3978	0.36304	+		Cog8	Q9JJA2	Cog8	Conserved oligomeric Golgi complex subunit 8	Cog8	19.632	0.408823			Clca3b	E9PUL3	Clca3b	Chloride channel accessory 3B	Clca3b	17.7147	0.596127				P28076	Psmb9	Proteasome subunit beta type-9	Psmb9	21.3219	0.933092	+									Q9D7D1	Rnf225	RING finger protein 225	Rnf225
P32921	Wars	Tryptophan--tRNA ligase, cytoplasmic	Wars	22.0213	0.394126	+		Col4a2	P08122	Col4a2	Collagen alpha-2(IV) chain	Col4a2	24.191	0.399695	+		Clec10a	P49300	Clec10a	C-type lectin domain family 10 member A	Clec10a	19.444	0.639228		+		P28654	Dcn	Decorin	Dcn	20.5001	1.46706	+									Q9D823	Rpl37	60S ribosomal protein L37	Rpl37
P35441	Thbs1	Thrombospondin-1	Thbs1	18.7106	0.175166	+		Colgalt1	Q8K297	Colgalt1	Procollagen galactosyltransferase 1	Colgalt1	20.6958	0.436573			Clptm1	Q8VBZ3	Clptm1	Cleft lip and palate transmembrane protein 1 homolog	Clptm1	19.1243	0.251953				P29533	Vcam1	Vascular cell adhesion protein 1	Vcam1	18.6945	2.07542	+									Q9D8I3	Glod5	Glyoxalase domain-containing protein 5	Glod5
P35831	Ptpn12	Tyrosine-protein phosphatase non-receptor type 12	Ptpn12	19.4781	0.839002	+		Cpsf3	Q9QXK7	Cpsf3	Cleavage and polyadenylation specificity factor subunit 3	Cpsf3	18.9562	0.855472			Clu	Q06890	Clu	Clusterin	Clu	19.3518	0.952956				P31324	Prkar2b	cAMP-dependent protein kinase type II-beta regulatory subunit	Prkar2b	19.1259	0.455646	+									Q9DCJ1	Mlst8	Target of rapamycin complex subunit LST8	Mlst8
P36371	Tap2	Antigen peptide transporter 2	Tap2	20.419	0.479271	+		Creld2	Q9CYA0	Creld2	Cysteine-rich with EGF-like domain protein 2	Creld2	19.9683	0.299208			Cluh	Q5SW19	Cluh	Clustered mitochondria protein homolog	Cluh	21.2333	0.237474		+		P32037	Slc2a3	Solute carrier family 2, facilitated glucose transporter member 3	Slc2a3	16.2986	1.21604	+									Q9ESY9	Ifi30	Gamma-interferon-inducible lysosomal thiol reductase	Ifi30
P38647	Hspa9	Stress-70 protein, mitochondrial	Hspa9	24.6868	0.188876	+		Crybg1	A0A0G2JG52	Crybg1	Crystallin beta-gamma domain-containing 1	Crybg1	18.5648	0.234986			Cmtr1	Q9DBC3	Cmtr1	Cap-specific mRNA (nucleoside-2'-O-)-methyltransferase 1	Cmtr1	19.895	0.218915	+			P32921	Wars	Tryptophan--tRNA ligase, cytoplasmic	Wars	21.9485	0.448549	+									Q9JKL4	Ndufaf3	NADH dehydrogenase [ubiquinone] 1 alpha subcomplex assembly factor 3	Ndufaf3
P39429	Traf2	TNF receptor-associated factor 2	Traf2	16.543	0.729026	+		Ctdsp1	P58466	Ctdsp1	Carboxy-terminal domain RNA polymerase II polypeptide A small phosphatase 1	Ctdsp1	18.7247	0.26722			Cnot10	Q8BH15	Cnot10	CCR4-NOT transcription complex subunit 10	Cnot10	18.3448	0.373669				P35441	Thbs1	Thrombospondin-1	Thbs1	20.3643	1.03145	+									Q9QZJ6	Mfap5	Microfibrillar-associated protein 5	Mfap5
P41216	Acsl1	Long-chain-fatty-acid--CoA ligase 1	Acsl1	19.7519	0.120151	+		Ctu2	Q3U308	Ctu2	Cytoplasmic tRNA 2-thiolation protein 2	Ctu2	18.0196	1.10118			Cog1	Q9Z160	Cog1	Conserved oligomeric Golgi complex subunit 1	Cog1	19.4486	0.420662				P35831	Ptpn12	Tyrosine-protein phosphatase non-receptor type 12	Ptpn12	19.2654	0.579264	+
P42225	Stat1	Signal transducer and activator of transcription 1	Stat1	20.1646	0.559299	+		Cwf19l1	Q8CI33	Cwf19l1	CWF19-like protein 1	Cwf19l1	17.4749	0.42153			Cog8	Q9JJA2	Cog8	Conserved oligomeric Golgi complex subunit 8	Cog8	19.5912	0.223925				P36371	Tap2	Antigen peptide transporter 2	Tap2	21.3125	0.658768	+
P43346	Dck	Deoxycytidine kinase	Dck	17.062	0.550553	+		Ddx20	Q9JJY4	Ddx20	Probable ATP-dependent RNA helicase DDX20	Ddx20	18.7066	0.672508			Col4a2	P08122	Col4a2	Collagen alpha-2(IV) chain	Col4a2	24.387	0.617872	+			P38647	Hspa9	Stress-70 protein, mitochondrial	Hspa9	24.6442	0.624049	+
P43406	Itgav	Integrin alpha-V	Itgav	20.5444	0.270263	+		Dhx16	G3X8X0	Dhx16	DEAH (Asp-Glu-Ala-His) box polypeptide 16	Dhx16	18.3593	0.877478			Colgalt1	Q8K297	Colgalt1	Procollagen galactosyltransferase 1	Colgalt1	20.7727	0.460915				P41216	Acsl1	Long-chain-fatty-acid--CoA ligase 1	Acsl1	19.1253	0.862881	+
P47791	Gsr	Glutathione reductase, mitochondrial	Gsr	21.8673	0.392776	+		Dis3	Q9CSH3	Dis3	Exosome complex exonuclease RRP44	Dis3	19.2384	0.528675			Cpsf3	Q9QXK7	Cpsf3	Cleavage and polyadenylation specificity factor subunit 3	Cpsf3	19.2859	0.576316				P42225	Stat1	Signal transducer and activator of transcription 1	Stat1	22.0196	1.14858	+
P48025	Syk	Tyrosine-protein kinase SYK	Syk	18.7713	0.251148	+		Dnaja2	Q9QYJ0	Dnaja2	DnaJ homolog subfamily A member 2	Dnaja2	22.0925	0.305953			Creld2	Q9CYA0	Creld2	Cysteine-rich with EGF-like domain protein 2	Creld2	20.1275	0.29328				P43406	Itgav	Integrin alpha-V	Itgav	20.1068	0.584651	+
P48722	Hspa4l	Heat shock 70 kDa protein 4L	Hspa4l	20.5073	0.499773	+		Dnm1	P39053	Dnm1	Dynamin-1	Dnm1	19.5072	0.341832			Crybg1	A0A0G2JG52	Crybg1	Crystallin beta-gamma domain-containing 1	Crybg1	18.7273	0.379118				P47791	Gsr	Glutathione reductase, mitochondrial	Gsr	21.4348	0.601502	+
P49710	Hcls1	Hematopoietic lineage cell-specific protein	Hcls1	20.1241	0.6107	+		Dock5	B2RY04	Dock5	Dedicator of cytokinesis protein 5	Dock5	17.1835	0.928221			Ctdsp1	P58466	Ctdsp1	Carboxy-terminal domain RNA polymerase II polypeptide A small phosphatase 1	Ctdsp1	18.8174	0.463648				P48025	Syk	Tyrosine-protein kinase SYK	Syk	19.5519	0.366492	+
P49817	Cav1	Caveolin-1	Cav1	22.6077	0.220641	+		Dtd2	Q8BHA3	Dtd2	D-aminoacyl-tRNA deacylase 2	Dtd2	18.4687	1.35404			Ctu2	Q3U308	Ctu2	Cytoplasmic tRNA 2-thiolation protein 2	Ctu2	18.1153	0.682248				P48722	Hspa4l	Heat shock 70 kDa protein 4L	Hspa4l	20.6355	0.491644	+
P50396	Gdi1	Rab GDP dissociation inhibitor alpha	Gdi1	20.5635	0.277234	+		Ebp	P70245	Ebp	3-beta-hydroxysteroid-Delta(8),Delta(7)-isomerase	Ebp	20.7461	0.863739			Cwf19l1	Q8CI33	Cwf19l1	CWF19-like protein 1	Cwf19l1	17.8109	1.02551				P49710	Hcls1	Hematopoietic lineage cell-specific protein	Hcls1	21.4084	0.608012	+
P56375	Acyp2	Acylphosphatase-2	Acyp2	19.1921	0.678521	+		Ece1	Q4PZA2	Ece1	Endothelin-converting enzyme 1	Ece1	19.6338	1.80554			Ddx20	Q9JJY4	Ddx20	Probable ATP-dependent RNA helicase DDX20	Ddx20	18.658	0.268088				P49817	Cav1	Caveolin-1	Cav1	22.1882	0.865627	+
P56528	Cd38	ADP-ribosyl cyclase/cyclic ADP-ribose hydrolase 1	Cd38	19.5977	0.537234	+		Eef1d	P57776	Eef1d	Elongation factor 1-delta	Eef1d	22.9389	0.409393			Ddx56	Q9D0R4	Ddx56	Probable ATP-dependent RNA helicase DDX56	Ddx56	17.8361	0.551358				P50396	Gdi1	Rab GDP dissociation inhibitor alpha	Gdi1	20.1804	0.291885	+
P57016	Lad1	Ladinin-1	Lad1	22.4634	0.136886	+		Eif2s1	Q6ZWX6	Eif2s1	Eukaryotic translation initiation factor 2 subunit 1	Eif2s1	22.0472	0.363684			Dhx16	G3X8X0	Dhx16	DEAH (Asp-Glu-Ala-His) box polypeptide 16	Dhx16	17.6322	0.608188				P50637	Tspo	Translocator protein	Tspo	19.8234	1.22009	+
P58069	Rasa2	Ras GTPase-activating protein 2	Rasa2	17.6217	0.138026	+		Eif3f	Q9DCH4	Eif3f	Eukaryotic translation initiation factor 3 subunit F	Eif3f	21.0667	0.883401			Dis3	Q9CSH3	Dis3	Exosome complex exonuclease RRP44	Dis3	19.7649	0.372877				P51437	Camp	Cathelicidin antimicrobial peptide	Camp	19.3578	0.494585	+
P62915	Gtf2b	Transcription initiation factor IIB	Gtf2b	18.7774	0.249702	+		Eif3j1	Q3UGC7;Q66JS6	Eif3j1;Eif3j2	Eukaryotic translation initiation factor 3 subunit J-A	Eif3j1	21.505	0.34025			Dnaja2	Q9QYJ0	Dnaja2	DnaJ homolog subfamily A member 2	Dnaja2	22.0529	0.18786				P53690	Mmp14	Matrix metalloproteinase-14	Mmp14	18.6812	0.373747	+
P70122	Sbds	Ribosome maturation protein SBDS	Sbds	20.7981	0.239098	+		Eif5a	P63242	Eif5a	Eukaryotic translation initiation factor 5A-1	Eif5a	24.6117	0.686625			Dnm1	P39053	Dnm1	Dynamin-1	Dnm1	19.3105	0.557085				P56375	Acyp2	Acylphosphatase-2	Acyp2	18.6769	1.22134	+
P70380	Il18	Interleukin-18	Il18	17.9193	0.66596	+		Eif5b	Q05D44	Eif5b	Eukaryotic translation initiation factor 5B	Eif5b	20.8169	0.410797			Dock5	B2RY04	Dock5	Dedicator of cytokinesis protein 5	Dock5	17.6413	0.707148				P56528	Cd38	ADP-ribosyl cyclase/cyclic ADP-ribose hydrolase 1	Cd38	20.0517	1.31639	+
P70460	Vasp	Vasodilator-stimulated phosphoprotein	Vasp	21.126	0.340485	+		Eloa	Q8CB77	Eloa	Elongin-A	Eloa	19.1671	0.460707			Dtd2	Q8BHA3	Dtd2	D-aminoacyl-tRNA deacylase 2	Dtd2	18.6641	0.67823				P57016	Lad1	Ladinin-1	Lad1	21.9746	0.71516	+
P82198	Tgfbi	Transforming growth factor-beta-induced protein ig-h3	Tgfbi	23.827	0.191437	+		Emc3	Q99KI3	Emc3	ER membrane protein complex subunit 3	Emc3	19.3984	0.743954			Ebp	P70245	Ebp	3-beta-hydroxysteroid-Delta(8),Delta(7)-isomerase	Ebp	20.5716	0.359135				P58069	Rasa2	Ras GTPase-activating protein 2	Rasa2	17.9173	0.823755	+
P97360	Etv6	Transcription factor ETV6	Etv6	19.1646	0.8594	+		Erp44	Q9D1Q6	Erp44	Endoplasmic reticulum resident protein 44	Erp44	22.9669	0.475848			Ece1	Q4PZA2	Ece1	Endothelin-converting enzyme 1	Ece1	19.7269	0.325106				P62915	Gtf2b	Transcription initiation factor IIB	Gtf2b	19.0598	0.385565	+
P97364	Sephs2	Selenide, water dikinase 2	Sephs2	18.5766	0.845135	+		Evpl	Q9D952	Evpl	Envoplakin	Evpl	19.421	0.916202			Eef1d	P57776	Eef1d	Elongation factor 1-delta	Eef1d	23.3786	0.335521				P70122	Sbds	Ribosome maturation protein SBDS	Sbds	20.9154	0.760402	+
P97372	Psme2	Proteasome activator complex subunit 2	Psme2	21.8815	0.297165	+		Exosc2	Q8VBV3	Exosc2	Exosome complex component RRP4	Exosc2	19.4012	0.88992			Eif2s1	Q6ZWX6	Eif2s1	Eukaryotic translation initiation factor 2 subunit 1	Eif2s1	22.2826	0.0752199				P70460	Vasp	Vasodilator-stimulated phosphoprotein	Vasp	20.7943	0.656612	+
P97864	Casp7	Caspase-7	Casp7	20.8708	0.56975	+		Exosc4	Q921I9	Exosc4	Exosome complex component RRP41	Exosc4	18.5793	0.801929			Eif3f	Q9DCH4	Eif3f	Eukaryotic translation initiation factor 3 subunit F	Eif3f	21.2349	0.333222				P82198	Tgfbi	Transforming growth factor-beta-induced protein ig-h3	Tgfbi	23.526	0.789959	+
P98078	Dab2	Disabled homolog 2	Dab2	19.2381	0.627289	+		Exosc5	Q9CRA8	Exosc5	Exosome complex component RRP46	Exosc5	18.8114	0.753057			Eif3j1	Q3UGC7;Q66JS6	Eif3j1;Eif3j2	Eukaryotic translation initiation factor 3 subunit J-A	Eif3j1	21.5304	0.278062				P97360	Etv6	Transcription factor ETV6	Etv6	19.9716	0.428396	+
P99029	Prdx5	Peroxiredoxin-5, mitochondrial	Prdx5	24.3386	0.304717	+		Exosc8	Q9D753	Exosc8	Exosome complex component RRP43	Exosc8	18.6638	0.200088			Eif5a	P63242	Eif5a	Eukaryotic translation initiation factor 5A-1	Eif5a	24.4929	0.294774				P97372	Psme2	Proteasome activator complex subunit 2	Psme2	22.0883	0.387864	+
Q00651	Itga4	Integrin alpha-4	Itga4	18.1209	0.245263	+		Fdps	Q920E5	Fdps	Farnesyl pyrophosphate synthase	Fdps	21.5562	0.827985			Eif5b	Q05D44	Eif5b	Eukaryotic translation initiation factor 5B	Eif5b	21.0435	0.1486				P97430	Slpi	Antileukoproteinase	Slpi	19.4363	0.844431	+
Q03963	Eif2ak2	Interferon-induced, double-stranded RNA-activated protein kinase	Eif2ak2	20.8868	1.32976	+		Fkbp4	P30416	Fkbp4	Peptidyl-prolyl cis-trans isomerase FKBP4	Fkbp4	21.628	0.267828			Eloa	Q8CB77	Eloa	Elongin-A	Eloa	18.3659	0.244531				P97864	Casp7	Caspase-7	Casp7	20.8714	0.844924	+
Q04207	Rela	Transcription factor p65	Rela	19.7498	0.315349	+		Fkbp5	Q64378	Fkbp5	Peptidyl-prolyl cis-trans isomerase FKBP5	Fkbp5	18.5006	1.09899			Emc3	Q99KI3	Emc3	ER membrane protein complex subunit 3	Emc3	18.737	0.816172				P98078	Dab2	Disabled homolog 2	Dab2	19.5288	0.591063	+
Q04750	Top1	DNA topoisomerase 1	Top1	21.2884	0.128905	+		G3bp2	P97379	G3bp2	Ras GTPase-activating protein-binding protein 2	G3bp2	22.4677	0.167125			Erp44	Q9D1Q6	Erp44	Endoplasmic reticulum resident protein 44	Erp44	22.4909	0.292034				P99029	Prdx5	Peroxiredoxin-5, mitochondrial	Prdx5	23.5062	0.85755	+
Q05117	Acp5	Tartrate-resistant acid phosphatase type 5	Acp5	19.2399	0.649743	+		Gc	P21614	Gc	Vitamin D-binding protein	Gc	19.5373	0.743482			Evpl	Q9D952	Evpl	Envoplakin	Evpl	19.4209	0.52764				Q00651	Itga4	Integrin alpha-4	Itga4	18.3209	1.23822	+
Q05144	Rac2	Ras-related C3 botulinum toxin substrate 2	Rac2	24.6641	0.258778	+		Gch1	Q05915	Gch1	GTP cyclohydrolase 1	Gch1	17.4449	0.537455	+		Exosc2	Q8VBV3	Exosc2	Exosome complex component RRP4	Exosc2	19.7296	0.390625				Q03963	Eif2ak2	Interferon-induced, double-stranded RNA-activated protein kinase	Eif2ak2	20.6653	0.926931	+
Q05915	Gch1	GTP cyclohydrolase 1	Gch1	16.5793	0.810456	+		Gemin5	Q8BX17	Gemin5	Gem-associated protein 5	Gemin5	18.3353	0.364035			Exosc4	Q921I9	Exosc4	Exosome complex component RRP41	Exosc4	18.6097	0.510706				Q04207	Rela	Transcription factor p65	Rela	20.7738	0.594336	+
Q09199	B4galnt2	Beta-1,4 N-acetylgalactosaminyltransferase 2	B4galnt2	21.2239	0.421497	+		Gfm1	Q8K0D5	Gfm1	Elongation factor G, mitochondrial	Gfm1	20.6557	0.205908			Exosc5	Q9CRA8	Exosc5	Exosome complex component RRP46	Exosc5	18.7802	0.333436				Q04750	Top1	DNA topoisomerase 1	Top1	21.3388	0.373014	+
Q0VGB7	Ppp4r2	Serine/threonine-protein phosphatase 4 regulatory subunit 2	Ppp4r2	18.2416	0.702135	+		Gigyf2	Q6Y7W8	Gigyf2	GRB10-interacting GYF protein 2	Gigyf2	18.8642	0.725375			Exosc8	Q9D753	Exosc8	Exosome complex component RRP43	Exosc8	18.8992	0.64782				Q05117	Acp5	Tartrate-resistant acid phosphatase type 5	Acp5	19.6599	0.896206	+
Q3THS6	Mat2a	S-adenosylmethionine synthase isoform type-2	Mat2a	21.1726	0.391305	+		Gmppa	Q922H4	Gmppa	Mannose-1-phosphate guanyltransferase alpha	Gmppa	20.3953	0.383143			Fcgr2	P08101	Fcgr2	Low affinity immunoglobulin gamma Fc region receptor II	Fcgr2	20.3052	0.221022				Q05144	Rac2	Ras-related C3 botulinum toxin substrate 2	Rac2	24.9129	0.431244	+
Q3TJD7	Pdlim7	PDZ and LIM domain protein 7	Pdlim7	23.6603	0.610818	+		Gnl3	Q8CI11	Gnl3	Guanine nucleotide-binding protein-like 3	Gnl3	19.0819	2.02996			Fdps	Q920E5	Fdps	Farnesyl pyrophosphate synthase	Fdps	21.9167	0.396331				Q05915	Gch1	GTP cyclohydrolase 1	Gch1	18.0342	0.234797	+
Q3TKY6	Cwc27	Spliceosome-associated protein CWC27 homolog	Cwc27	18.1622	0.240459	+		Golga1	Q9CW79	Golga1	Golgin subfamily A member 1	Golga1	19.0478	1.18084			Fkbp4	P30416	Fkbp4	Peptidyl-prolyl cis-trans isomerase FKBP4	Fkbp4	21.4545	0.347531				Q09014	Ncf1	Neutrophil cytosol factor 1	Ncf1	19.771	0.965467	+
Q3TN34	Micall2	MICAL-like protein 2	Micall2	18.2649	1.12841	+		Gpd2	Q64521	Gpd2	Glycerol-3-phosphate dehydrogenase, mitochondrial	Gpd2	21.4744	0.227739	+		Fkbp5	Q64378	Fkbp5	Peptidyl-prolyl cis-trans isomerase FKBP5	Fkbp5	19.3564	0.629608				Q09199	B4galnt2	Beta-1,4 N-acetylgalactosaminyltransferase 2	B4galnt2	21.7297	0.972899	+
Q3TVI8	Pbxip1	Pre-B-cell leukemia transcription factor-interacting protein 1	Pbxip1	21.158	0.622189	+		Gsdmdc1	Q9D8T2	Gsdmdc1	Gasdermin-D	Gsdmdc1	21.337	0.460679			G3bp2	P97379	G3bp2	Ras GTPase-activating protein-binding protein 2	G3bp2	22.3653	0.146047				Q0VGB7	Ppp4r2	Serine/threonine-protein phosphatase 4 regulatory subunit 2	Ppp4r2	19.2652	0.667705	+
Q3U5Q7	Cmpk2	UMP-CMP kinase 2, mitochondrial	Cmpk2	18.7495	0.514178	+		Gspt1	Q8R050	Gspt1	Eukaryotic peptide chain release factor GTP-binding subunit ERF3A	Gspt1	21.6366	0.657739			Gc	P21614	Gc	Vitamin D-binding protein	Gc	19.5914	0.795979				Q3THS6	Mat2a	S-adenosylmethionine synthase isoform type-2	Mat2a	21.299	0.55926	+
Q3UW53	Fam129a	Protein Niban	Fam129a	22.7104	0.378679	+		Hm13	Q9D8V0	Hm13	Minor histocompatibility antigen H13	Hm13	19.0955	0.473368			Gch1	Q05915	Gch1	GTP cyclohydrolase 1	Gch1	18.1616	0.441676	+			Q3TJD7	Pdlim7	PDZ and LIM domain protein 7	Pdlim7	23.0042	1.17692	+
Q3UZA1	Rcsd1	CapZ-interacting protein	Rcsd1	16.8777	1.88396	+		Hmbs	P22907	Hmbs	Porphobilinogen deaminase	Hmbs	19.6385	0.938803			Gemin5	Q8BX17	Gemin5	Gem-associated protein 5	Gemin5	18.8027	0.435259				Q3TKY6	Cwc27	Spliceosome-associated protein CWC27 homolog	Cwc27	18.4373	0.0767113	+
Q4VBD2	Tapt1	Transmembrane anterior posterior transformation protein 1	Tapt1	17.7628	0.693294	+		Hmgb2	P30681	Hmgb2	High mobility group protein B2	Hmgb2	21.8158	0.549393			Gfm1	Q8K0D5	Gfm1	Elongation factor G, mitochondrial	Gfm1	20.8342	0.418108				Q3TN34	Micall2	MICAL-like protein 2	Micall2	17.823	1.88254	+
Q5EBG6	Hspb6	Heat shock protein beta-6	Hspb6	22.2051	0.398739	+		Hmgcs1	Q8JZK9	Hmgcs1	Hydroxymethylglutaryl-CoA synthase, cytoplasmic	Hmgcs1	19.8759	0.492244			Gigyf2	Q6Y7W8	Gigyf2	GRB10-interacting GYF protein 2	Gigyf2	18.7952	0.554225				Q3TVI8	Pbxip1	Pre-B-cell leukemia transcription factor-interacting protein 1	Pbxip1	19.5425	1.0876	+
Q5RKZ7	Mocs1	Molybdenum cofactor biosynthesis protein 1	Mocs1	18.2351	0.477527	+		Hmox2	O70252	Hmox2	Heme oxygenase 2	Hmox2	20.0119	0.754551			Gmppa	Q922H4	Gmppa	Mannose-1-phosphate guanyltransferase alpha	Gmppa	20.2465	0.373306				Q3U5Q7	Cmpk2	UMP-CMP kinase 2, mitochondrial	Cmpk2	18.1152	0.922969	+
Q5SUA5	Myo1g	Unconventional myosin-Ig	Myo1g	18.6196	0.684083	+		Hnrnpa0	Q9CX86	Hnrnpa0	Heterogeneous nuclear ribonucleoprotein A0	Hnrnpa0	22.0168	0.288418			Gnl3	Q8CI11	Gnl3	Guanine nucleotide-binding protein-like 3	Gnl3	19.8134	0.483961				Q3UW53	Fam129a	Protein Niban	Fam129a	22.2881	0.436854	+
Q60710	Samhd1	Deoxynucleoside triphosphate triphosphohydrolase SAMHD1	Samhd1	22.0709	0.337028	+		Hook3	Q8BUK6	Hook3	Protein Hook homolog 3	Hook3	19.382	0.840265			Golga1	Q9CW79	Golga1	Golgin subfamily A member 1	Golga1	18.9158	1.04031				Q3UZA1	Rcsd1	CapZ-interacting protein	Rcsd1	17.1367	1.60465	+
Q60715	P4ha1	Prolyl 4-hydroxylase subunit alpha-1	P4ha1	17.2886	1.49226	+		Igfbp7	Q61581	Igfbp7	Insulin-like growth factor-binding protein 7	Igfbp7	19.598	1.5155			Gpd2	Q64521	Gpd2	Glycerol-3-phosphate dehydrogenase, mitochondrial	Gpd2	21.55	0.28104	+			Q5EBG6	Hspb6	Heat shock protein beta-6	Hspb6	21.0314	0.680716	+
Q60766	Irgm1	Immunity-related GTPase family M protein 1	Irgm1	19.0869	0.517107	+		Ipo5	Q8BKC5	Ipo5	Importin-5	Ipo5	20.8551	0.347298			Gsdmdc1	Q9D8T2	Gsdmdc1	Gasdermin-D	Gsdmdc1	21.1421	0.399255				Q5RKZ7	Mocs1	Molybdenum cofactor biosynthesis protein 1	Mocs1	18.3376	1.11572	+
Q60864	Stip1	Stress-induced-phosphoprotein 1	Stip1	22.7449	0.221968	+		Irgm1	Q60766	Irgm1	Immunity-related GTPase family M protein 1	Irgm1	20.0051	0.419162	+		Gspt1	Q8R050	Gspt1	Eukaryotic peptide chain release factor GTP-binding subunit ERF3A	Gspt1	21.6934	0.113507				Q5SUA5	Myo1g	Unconventional myosin-Ig	Myo1g	20.0176	1.19585	+
Q60974	Ncor1	Nuclear receptor corepressor 1	Ncor1	17.9715	0.446908	+		Jpt2	Q6PGH2	Jpt2	Jupiter microtubule associated homolog 2	Jpt2	19.2299	0.727089			Heatr1	G3X9B1	Heatr1	HEAT repeat-containing 1	Heatr1	18.4802	0.399897				Q60710	Samhd1	Deoxynucleoside triphosphate triphosphohydrolase SAMHD1	Samhd1	23.0223	0.450381	+
Q61024	Asns	Asparagine synthetase [glutamine-hydrolyzing]	Asns	19.6366	0.20074	+		Kti12	Q9D1R2	Kti12	Protein KTI12 homolog	Kti12	20.046	0.666079		+	Hgsnat	Q3UDW8	Hgsnat	Heparan-alpha-glucosaminide N-acetyltransferase	Hgsnat	19.5255	0.269824				Q60715	P4ha1	Prolyl 4-hydroxylase subunit alpha-1	P4ha1	18.1781	0.536612	+
Q61093	Cybb	Cytochrome b-245 heavy chain	Cybb	18.4522	0.359109	+		Lamp1	P11438	Lamp1	Lysosome-associated membrane glycoprotein 1	Lamp1	19.2162	0.486853			Hm13	Q9D8V0	Hm13	Minor histocompatibility antigen H13	Hm13	19.4357	0.409808				Q60766	Irgm1	Immunity-related GTPase family M protein 1	Irgm1	20.7226	0.475614	+
Q61147	Cp	Ceruloplasmin	Cp	20.548	0.478197	+		Lipa	Q9Z0M5	Lipa	Lysosomal acid lipase/cholesteryl ester hydrolase	Lipa	17.5222	0.841615		+	Hmbs	P22907	Hmbs	Porphobilinogen deaminase	Hmbs	19.5955	0.381426				Q60780	Gas7	Growth arrest-specific protein 7	Gas7	17.3665	0.606777	+
Q61235	Sntb2	Beta-2-syntrophin	Sntb2	20.8166	0.414544	+		Ltn1	Q6A009	Ltn1	E3 ubiquitin-protein ligase listerin	Ltn1	18.4742	0.532105			Hmgb2	P30681	Hmgb2	High mobility group protein B2	Hmgb2	21.856	0.23246				Q60787	Lcp2	Lymphocyte cytosolic protein 2	Lcp2	18.5062	1.16031	+
Q61510	Trim25	E3 ubiquitin/ISG15 ligase TRIM25	Trim25	19.6779	0.387978	+		Man2a1	P27046	Man2a1	Alpha-mannosidase 2	Man2a1	19.7322	0.443059			Hmgcs1	Q8JZK9	Hmgcs1	Hydroxymethylglutaryl-CoA synthase, cytoplasmic	Hmgcs1	19.9624	0.570794				Q60864	Stip1	Stress-induced-phosphoprotein 1	Stip1	23.1213	0.37216	+
Q61553	Fscn1	Fascin	Fscn1	20.2536	0.425389	+		Mbd2	Q9Z2E1	Mbd2	Methyl-CpG-binding domain protein 2	Mbd2	18.1861	2.26721			Hmox2	O70252	Hmox2	Heme oxygenase 2	Hmox2	19.9711	0.283817				Q60974	Ncor1	Nuclear receptor corepressor 1	Ncor1	18.1187	0.429725	+
Q62011	Pdpn	Podoplanin	Pdpn	18.9497	0.404784	+		Mcm4	P49717	Mcm4	DNA replication licensing factor MCM4	Mcm4	20.1894	0.621536			Hnrnpa0	Q9CX86	Hnrnpa0	Heterogeneous nuclear ribonucleoprotein A0	Hnrnpa0	22.02	0.285507				Q61024	Asns	Asparagine synthetase [glutamine-hydrolyzing]	Asns	20.588	0.654239	+
Q62059	Vcan	Versican core protein	Vcan	21.1486	0.291171	+		Mcm6	P97311	Mcm6	DNA replication licensing factor MCM6	Mcm6	21.16	0.436253			Hook3	Q8BUK6	Hook3	Protein Hook homolog 3	Hook3	19.3466	0.459322				Q61093	Cybb	Cytochrome b-245 heavy chain	Cybb	19.592	0.59478	+
Q63850	Nup62	Nuclear pore glycoprotein p62	Nup62	18.4389	1.03842	+		Mcmbp	Q8R3C0	Mcmbp	Mini-chromosome maintenance complex-binding protein	Mcmbp	19.2887	0.713169			Htatsf1	Q8BGC0	Htatsf1	HIV Tat-specific factor 1 homolog	Htatsf1	18.5434	0.981962				Q61147	Cp	Ceruloplasmin	Cp	22.6733	1.42489	+
Q64310	Surf4	Surfeit locus protein 4	Surf4	18.4737	0.726207	+		Mcrip1	Q3UGS4	Mcrip1	Mapk-regulated corepressor-interacting protein 1	Mcrip1	19.5094	0.432587			Igfbp7	Q61581	Igfbp7	Insulin-like growth factor-binding protein 7	Igfbp7	20.7183	0.520059				Q61235	Sntb2	Beta-2-syntrophin	Sntb2	20.7722	0.358431	+
Q64321	Zbtb7b	Zinc finger and BTB domain-containing protein 7B	Zbtb7b	18.106	0.49101	+		Mgat4c	Q9D306	Mgat4c	Alpha-1,3-mannosyl-glycoprotein 4-beta-N-acetylglucosaminyltransferase C	Mgat4c	19.3111	0.41233			Il16	O54824	Il16	Pro-interleukin-16	Il16	19.228	0.944659				Q61510	Trim25	E3 ubiquitin/ISG15 ligase TRIM25	Trim25	19.2287	0.686937	+
Q64471	Gstt1	Glutathione S-transferase theta-1	Gstt1	21.8316	0.742859	+		Mob1a	Q8BPB0;Q921Y0	Mob1a;Mob1b	MOB kinase activator 1B	Mob1a	20.622	0.556233			Ipo5	Q8BKC5	Ipo5	Importin-5	Ipo5	20.9837	0.222794				Q61553	Fscn1	Fascin	Fscn1	20.5381	0.693066	+
Q64521	Gpd2	Glycerol-3-phosphate dehydrogenase, mitochondrial	Gpd2	21.424	0.817948	+		Mob3a	Q8BSU7	Mob3a	MOB kinase activator 3A	Mob3a	19.5744	0.696941			Irgm1	Q60766	Irgm1	Immunity-related GTPase family M protein 1	Irgm1	20.6826	0.471633	+			Q61635	Ifi47	GTP-binding protein	Ifi47	19.3457	0.931869	+
Q6EDY6	Carmil1	F-actin-uncapping protein LRRC16A	Carmil1	18.6955	0.657876	+		Mogs	Q80UM7	Mogs	Mannosyl-oligosaccharide glucosidase	Mogs	20.5879	0.380132			Jpt2	Q6PGH2	Jpt2	Jupiter microtubule associated homolog 2	Jpt2	19.3334	0.784886				Q61646	Hp	Haptoglobin	Hp	24.0124	1.88399	+
Q6PDH0	Phldb1	Pleckstrin homology-like domain family B member 1	Phldb1	19.0648	0.116312	+		Mrpl1	Q99N96	Mrpl1	39S ribosomal protein L1, mitochondrial	Mrpl1	19.9187	0.497666			Kdm2a	P59997	Kdm2a	Lysine-specific demethylase 2A	Kdm2a	17.6206	0.430407				Q62011	Pdpn	Podoplanin	Pdpn	19.737	1.16965	+
Q6Q899	Ddx58	Probable ATP-dependent RNA helicase DDX58	Ddx58	19.3962	0.30965	+		Mrpl34	Q99N91	Mrpl34	39S ribosomal protein L34, mitochondrial	Mrpl34	17.8323	0.842662			Kti12	Q9D1R2	Kti12	Protein KTI12 homolog	Kti12	20.0351	0.243796		+		Q62059	Vcan	Versican core protein	Vcan	22.0699	0.744604	+
Q6ZPF4	Fmnl3	Formin-like protein 3	Fmnl3	17.5291	1.4432	+		Msantd4	Q91YU3	Msantd4	Myb/SANT-like DNA-binding domain-containing protein 4	Msantd4	20.1313	0.836061			Lamp1	P11438	Lamp1	Lysosome-associated membrane glycoprotein 1	Lamp1	19.4642	0.468348				Q63850	Nup62	Nuclear pore glycoprotein p62	Nup62	18.1868	0.779988	+
Q6ZQ58	Larp1	La-related protein 1	Larp1	20.755	0.62806	+		Myd88	P22366	Myd88	Myeloid differentiation primary response protein MyD88	Myd88	19.3859	0.648517	+		Lipa	Q9Z0M5	Lipa	Lysosomal acid lipase/cholesteryl ester hydrolase	Lipa	18.5491	0.451842		+		Q64471	Gstt1	Glutathione S-transferase theta-1	Gstt1	20.8775	1.32068	+
Q6ZQL4	Wdr43	WD repeat-containing protein 43	Wdr43	18.6087	0.420689	+		Myh7	Q91Z83	Myh7	Myosin-7	Myh7	24.338	0.950118			Lpxn	Q99N69	Lpxn	Leupaxin	Lpxn	18.5918	0.591235		+		Q64521	Gpd2	Glycerol-3-phosphate dehydrogenase, mitochondrial	Gpd2	21.5266	0.300203	+
Q80TM9	Nisch	Nischarin	Nisch	18.913	0.346202	+		Myh9	Q8VDD5	Myh9	Myosin-9	Myh9	24.9701	0.203703			Ltn1	Q6A009	Ltn1	E3 ubiquitin-protein ligase listerin	Ltn1	18.3345	0.338978				Q6EDY6	Carmil1	F-actin-uncapping protein LRRC16A	Carmil1	18.5223	0.211838	+
Q80UW5	Cdc42bpg	Serine/threonine-protein kinase MRCK gamma	Cdc42bpg	17.9923	0.227134	+		Nes	Q6P5H2	Nes	Nestin	Nes	19.4704	0.69812		+	Man2a1	P27046	Man2a1	Alpha-mannosidase 2	Man2a1	20.0161	0.396041				Q6PDH0	Phldb1	Pleckstrin homology-like domain family B member 1	Phldb1	18.1901	0.439713	+
Q80WJ7	Mtdh	Protein LYRIC	Mtdh	21.6879	0.257104	+		Ngly1	Q9JI78	Ngly1	Peptide-N(4)-(N-acetyl-beta-glucosaminyl)asparagine amidase	Ngly1	19.3722	0.410023			Mbd2	Q9Z2E1	Mbd2	Methyl-CpG-binding domain protein 2	Mbd2	18.7533	0.751316				Q6Q899	Ddx58	Probable ATP-dependent RNA helicase DDX58	Ddx58	19.3956	0.689479	+
Q80WT5	Aftph	Aftiphilin	Aftph	19.286	0.379752	+		Noc2l	Q9WV70	Noc2l	Nucleolar complex protein 2 homolog	Noc2l	17.4199	0.859884			Mcm4	P49717	Mcm4	DNA replication licensing factor MCM4	Mcm4	19.9057	0.372269				Q6ZQ58	Larp1	La-related protein 1	Larp1	20.5133	0.684413	+
Q80X90	Flnb	Filamin-B	Flnb	23.2695	0.167436	+		Nop16	Q9CPT5	Nop16	Nucleolar protein 16	Nop16	19.1374	0.376206			Mcm6	P97311	Mcm6	DNA replication licensing factor MCM6	Mcm6	21.1109	0.205172				Q6ZQL4	Wdr43	WD repeat-containing protein 43	Wdr43	18.9802	0.864339	+
Q810U5	Ccdc50	Coiled-coil domain-containing protein 50	Ccdc50	17.5363	1.30258	+		Nos1	Q9Z0J4	Nos1	Nitric oxide synthase, brain	Nos1	19.7503	0.608195			Mcmbp	Q8R3C0	Mcmbp	Mini-chromosome maintenance complex-binding protein	Mcmbp	18.7727	0.179406				Q80TM9	Nisch	Nischarin	Nisch	18.76	0.630576	+
Q8BG95	Ppp1r12b	Protein phosphatase 1 regulatory subunit 12B	Ppp1r12b	22.1005	0.455587	+		Nrp2	O35375	Nrp2	Neuropilin-2	Nrp2	19.8152	0.265527			Mcrip1	Q3UGS4	Mcrip1	Mapk-regulated corepressor-interacting protein 1	Mcrip1	19.4372	0.201571				Q80UW5	Cdc42bpg	Serine/threonine-protein kinase MRCK gamma	Cdc42bpg	18.3386	0.152452	+
Q8BGQ7	Aars	Alanine--tRNA ligase, cytoplasmic	Aars	21.2367	0.198266	+		Nsdhl	Q9R1J0	Nsdhl	Sterol-4-alpha-carboxylate 3-dehydrogenase, decarboxylating	Nsdhl	19.5965	0.763647			Mdc1	Q5PSV9	Mdc1	Mediator of DNA damage checkpoint protein 1	Mdc1	18.1187	0.484321				Q80WJ7	Mtdh	Protein LYRIC	Mtdh	21.8121	0.476299	+
Q8BH59	Slc25a12	Calcium-binding mitochondrial carrier protein Aralar1	Slc25a12	22.4721	0.429221	+		Nudt9	Q8BVU5	Nudt9	ADP-ribose pyrophosphatase, mitochondrial	Nudt9	19.5073	0.42145			Mfge8	P21956	Mfge8	Lactadherin	Mfge8	19.7929	0.237975				Q80WT5	Aftph	Aftiphilin	Aftph	19.3747	0.864484	+
Q8BTY2	Slc4a7	Sodium bicarbonate cotransporter 3	Slc4a7	18.473	0.0356535	+		Nufip2	Q5F2E7	Nufip2	Nuclear fragile X mental retardation-interacting protein 2	Nufip2	18.0079	0.534507			Mgat4c	Q9D306	Mgat4c	Alpha-1,3-mannosyl-glycoprotein 4-beta-N-acetylglucosaminyltransferase C	Mgat4c	19.7647	0.550452				Q80X90	Flnb	Filamin-B	Flnb	23.2332	0.385068	+
Q8BYI6	Lpcat2	Lysophosphatidylcholine acyltransferase 2	Lpcat2	19.0764	0.687371	+		Numa1	E9Q7G0	Numa1	Nuclear mitotic apparatus protein 1	Numa1	21.23	0.125735		+	Mob1a	Q8BPB0;Q921Y0	Mob1a;Mob1b	MOB kinase activator 1B	Mob1a	20.799	0.398889				Q8BG95	Ppp1r12b	Protein phosphatase 1 regulatory subunit 12B	Ppp1r12b	21.4397	0.300472	+
Q8BYY4	Ttc39b	Tetratricopeptide repeat protein 39B	Ttc39b	17.9949	0.598041	+		Otud4	B2RRE7	Otud4	OTU domain-containing protein 4	Otud4	18.7595	0.328206			Mob3a	Q8BSU7	Mob3a	MOB kinase activator 3A	Mob3a	20.0852	0.364842				Q8BGQ7	Aars	Alanine--tRNA ligase, cytoplasmic	Aars	21.4263	0.558104	+
Q8BZ20	Parp12	Poly [ADP-ribose] polymerase 12	Parp12	18.9513	0.102902	+		P2rx4	Q9JJX6	P2rx4	P2X purinoceptor 4	P2rx4	19.6112	0.941902			Mogs	Q80UM7	Mogs	Mannosyl-oligosaccharide glucosidase	Mogs	20.6728	0.220256				Q8BH59	Slc25a12	Calcium-binding mitochondrial carrier protein Aralar1	Slc25a12	21.8711	0.142945	+
Q8C025	Chpt1	Cholinephosphotransferase 1	Chpt1	19.8062	0.200237	+		Parp1	P11103	Parp1	Poly [ADP-ribose] polymerase 1	Parp1	19.3585	0.433751		+	Morf4l2	Q9R0Q4	Morf4l2	Mortality factor 4-like protein 2	Morf4l2	19.2235	0.560448				Q8BTY2	Slc4a7	Sodium bicarbonate cotransporter 3	Slc4a7	18.7665	0.6603	+
Q8C0T5	Sipa1l1	Signal-induced proliferation-associated 1-like protein 1	Sipa1l1	16.7256	0.274166	+		Parp9	Q8CAS9	Parp9	Poly [ADP-ribose] polymerase 9	Parp9	19.7499	0.742913	+		Mrpl1	Q99N96	Mrpl1	39S ribosomal protein L1, mitochondrial	Mrpl1	18.9644	0.48528				Q8BYI6	Lpcat2	Lysophosphatidylcholine acyltransferase 2	Lpcat2	20.1109	0.743765	+
Q8C4Q6	Aida	Axin interactor, dorsalization-associated protein	Aida	19.3661	0.23543	+		Pcif1	P59114	Pcif1	Phosphorylated CTD-interacting factor 1	Pcif1	17.9237	0.560924			Mrpl34	Q99N91	Mrpl34	39S ribosomal protein L34, mitochondrial	Mrpl34	18.0066	0.862273				Q8BYY4	Ttc39b	Tetratricopeptide repeat protein 39B	Ttc39b	18.1059	0.313603	+
Q8CAS9	Parp9	Poly [ADP-ribose] polymerase 9	Parp9	19.486	0.872557	+		Pdcd11	Q6NS46	Pdcd11	Protein RRP5 homolog	Pdcd11	17.6666	0.607016			Msantd4	Q91YU3	Msantd4	Myb/SANT-like DNA-binding domain-containing protein 4	Msantd4	20.0556	0.263356				Q8BZ20	Parp12	Poly [ADP-ribose] polymerase 12	Parp12	19.3584	0.414828	+
Q8CBY8	Dctn4	Dynactin subunit 4	Dctn4	19.2943	0.783907	+		Pdia3	P27773	Pdia3	Protein disulfide-isomerase A3	Pdia3	25.3162	0.305359			Myd88	P22366	Myd88	Myeloid differentiation primary response protein MyD88	Myd88	19.5177	0.370082	+			Q8C4Q6	Aida	Axin interactor, dorsalization-associated protein	Aida	19.2	0.449151	+
Q8JZZ7	Adgrl2	Adhesion G protein-coupled receptor L2	Adgrl2	16.5066	0.685389	+		Pelp1	Q9DBD5	Pelp1	Proline-, glutamic acid- and leucine-rich protein 1	Pelp1	17.7513	0.301754			Myh7	Q91Z83	Myh7	Myosin-7	Myh7	24.5819	1.15117				Q8CAS9	Parp9	Poly [ADP-ribose] polymerase 9	Parp9	19.9233	0.290332	+
Q8K012	Fnbp1l	Formin-binding protein 1-like	Fnbp1l	18.0722	0.298889	+		Pex16	Q91XC9	Pex16	Peroxisomal membrane protein PEX16	Pex16	18.3713	0.631704			Myh9	Q8VDD5	Myh9	Myosin-9	Myh9	25.0447	0.167421				Q8CBY8	Dctn4	Dynactin subunit 4	Dctn4	18.428	0.489134	+
Q8K1H1	Tdrd7	Tudor domain-containing protein 7	Tdrd7	16.9671	0.425455	+		Pi4k2a	Q2TBE6	Pi4k2a	Phosphatidylinositol 4-kinase type 2-alpha	Pi4k2a	17.9928	0.696855			Myl2	P51667	Myl2	Myosin regulatory light chain 2, ventricular/cardiac muscle isoform	Myl2	20.6062	1.77233				Q8K3H0	Appl1	DCC-interacting protein 13-alpha	Appl1	19.4912	1.03802	+
Q8K3H0	Appl1	DCC-interacting protein 13-alpha	Appl1	19.5634	0.457711	+		Pigt	Q8BXQ2	Pigt	GPI transamidase component PIG-T	Pigt	19.3111	0.971352			Nes	Q6P5H2	Nes	Nestin	Nes	19.2495	0.630221		+		Q8K482	Emilin2	EMILIN-2	Emilin2	18.2282	1.24146	+
Q8R138	Tmem119	Transmembrane protein 119	Tmem119	18.8043	0.184014	+		Plrg1	Q922V4	Plrg1	Pleiotropic regulator 1	Plrg1	19.4078	0.456797			Ngly1	Q9JI78	Ngly1	Peptide-N(4)-(N-acetyl-beta-glucosaminyl)asparagine amidase	Ngly1	19.2713	0.312391				Q8R138	Tmem119	Transmembrane protein 119	Tmem119	18.7689	1.30296	+
Q8R151	Znfx1	NFX1-type zinc finger-containing protein 1	Znfx1	18.4272	0.266645	+		Pnn	O35691	Pnn	Pinin	Pnn	20.3226	0.588084			Noc2l	Q9WV70	Noc2l	Nucleolar complex protein 2 homolog	Noc2l	17.8657	0.492534				Q8R151	Znfx1	NFX1-type zinc finger-containing protein 1	Znfx1	18.703	0.507453	+
Q8R1B4	Eif3c	Eukaryotic translation initiation factor 3 subunit C	Eif3c	21.1535	0.354695	+		Ppp1r14b	Q62084	Ppp1r14b	Protein phosphatase 1 regulatory subunit 14B	Ppp1r14b	19.8823	0.505631			Nop16	Q9CPT5	Nop16	Nucleolar protein 16	Nop16	19.4461	0.162009				Q8R1B4	Eif3c	Eukaryotic translation initiation factor 3 subunit C	Eif3c	21.403	0.521552	+
Q8R2Q8	Bst2	Bone marrow stromal antigen 2	Bst2	19.2499	0.231423	+		Ppp2r5d	Q91V89	Ppp2r5d	Serine/threonine-protein phosphatase 2A 56 kDa regulatory subunit	Ppp2r5d	18.4683	1.09958			Nos1	Q9Z0J4	Nos1	Nitric oxide synthase, brain	Nos1	19.5351	0.910651				Q8R2Q8	Bst2	Bone marrow stromal antigen 2	Bst2	19.25	0.586124	+
Q8R3E3	Wipi1	WD repeat domain phosphoinositide-interacting protein 1	Wipi1	18.6644	1.28812	+		Prmt5	Q8CIG8	Prmt5	Protein arginine N-methyltransferase 5	Prmt5	21.1211	0.355562			Nrp2	O35375	Nrp2	Neuropilin-2	Nrp2	19.5667	0.524036				Q8R3E3	Wipi1	WD repeat domain phosphoinositide-interacting protein 1	Wipi1	18.4974	1.01049	+
Q8R3U1	Pla2g16	HRAS-like suppressor 3	Pla2g16	19.6678	0.143361	+		Prpf38b	Q80SY5	Prpf38b	Pre-mRNA-splicing factor 38B	Prpf38b	19.3627	0.660674			Nsdhl	Q9R1J0	Nsdhl	Sterol-4-alpha-carboxylate 3-dehydrogenase, decarboxylating	Nsdhl	19.4203	1.21435				Q8R5F7	Ifih1	Interferon-induced helicase C domain-containing protein 1	Ifih1	19.1438	0.943843	+
Q8R5F7	Ifih1	Interferon-induced helicase C domain-containing protein 1	Ifih1	19.5079	0.427731	+		Prps2	Q9CS42	Prps2	Ribose-phosphate pyrophosphokinase 2	Prps2	19.8709	0.622661			Nudt9	Q8BVU5	Nudt9	ADP-ribose pyrophosphatase, mitochondrial	Nudt9	18.9317	0.66336				Q8VD31	Tapbpl	Tapasin-related protein	Tapbpl	19.1358	1.20851	+
Q8VDC1	Fyco1	FYVE and coiled-coil domain-containing protein 1	Fyco1	18.2779	0.608297	+		Prrc1	Q3UPH1	Prrc1	Protein PRRC1	Prrc1	20.2356	0.252769			Nufip2	Q5F2E7	Nufip2	Nuclear fragile X mental retardation-interacting protein 2	Nufip2	18.5665	0.548172				Q8VDV8	Mitd1	MIT domain-containing protein 1	Mitd1	17.6371	0.957015	+
Q8VDV8	Mitd1	MIT domain-containing protein 1	Mitd1	17.4554	0.555157	+		Prrc2a	Q7TSC1	Prrc2a	Protein PRRC2A	Prrc2a	19.0472	0.525741			Numa1	E9Q7G0	Numa1	Nuclear mitotic apparatus protein 1	Numa1	21.2657	0.150468		+		Q8VI94	Oasl1	2'-5'-oligoadenylate synthase-like protein 1	Oasl1	18.8951	1.37752	+
Q8VI94	Oasl1	2'-5'-oligoadenylate synthase-like protein 1	Oasl1	18.4445	0.588865	+		Psma2	P49722	Psma2	Proteasome subunit alpha type-2	Psma2	23.1509	0.222134			Otud4	B2RRE7	Otud4	OTU domain-containing protein 4	Otud4	18.8909	0.363568				Q91XB0	Trex1	Three-prime repair exonuclease 1	Trex1	18.9739	1.07379	+
Q91VC9	Ghitm	Growth hormone-inducible transmembrane protein	Ghitm	17.7287	0.34834	+		Psma6	Q9QUM9	Psma6	Proteasome subunit alpha type-6	Psma6	23.4118	0.342662			P2rx4	Q9JJX6	P2rx4	P2X purinoceptor 4	P2rx4	19.1551	0.421358				Q91YT8	Tmem63a	CSC1-like protein 1	Tmem63a	19.1785	0.794236	+
Q91W36	Usp3	Ubiquitin carboxyl-terminal hydrolase 3	Usp3	20.2157	0.221627	+		Psmb2	Q9R1P3	Psmb2	Proteasome subunit beta type-2	Psmb2	21.3769	0.348034			Parp1	P11103	Parp1	Poly [ADP-ribose] polymerase 1	Parp1	19.4407	0.394851		+		Q91Z40	Gbp7	Gbp6 protein	Gbp7	19.3689	1.10321	+
Q91YT8	Tmem63a	CSC1-like protein 1	Tmem63a	19.3741	0.578683	+		Psmb8	P28063	Psmb8	Proteasome subunit beta type-8	Psmb8	20.6227	0.450272	+		Parp9	Q8CAS9	Parp9	Poly [ADP-ribose] polymerase 9	Parp9	19.983	0.173856	+			Q91ZR2	Snx18	Sorting nexin-18	Snx18	18.9285	0.663497	+
Q91Z40	Gbp7	Gbp6 protein	Gbp7	18.7309	0.479357	+		Psme4	Q5SSW2	Psme4	Proteasome activator complex subunit 4	Psme4	18.4598	0.454732			Pcif1	P59114	Pcif1	Phosphorylated CTD-interacting factor 1	Pcif1	17.8023	0.256292				Q91ZU6	Dst	Dystonin	Dst	18.1008	0.357197	+
Q91ZR2	Snx18	Sorting nexin-18	Snx18	18.7121	0.13834	+		Psmg1	Q9JK23	Psmg1	Proteasome assembly chaperone 1	Psmg1	20.2094	0.372487			Pcm1	Q9R0L6	Pcm1	Pericentriolar material 1 protein	Pcm1	17.7266	0.247774				Q921T2	Tor1aip1	Torsin-1A-interacting protein 1	Tor1aip1	19.6977	0.512911	+
Q91ZU6	Dst	Dystonin	Dst	18.5027	0.0812258	+		Ptk6	Q64434	Ptk6	Protein-tyrosine kinase 6	Ptk6	23.5228	3.28214			Pdcd11	Q6NS46	Pdcd11	Protein RRP5 homolog	Pdcd11	17.6298	0.799919				Q99J10	Ctu1	Cytoplasmic tRNA 2-thiolation protein 1	Ctu1	21.3145	1.19303	+
Q921T2	Tor1aip1	Torsin-1A-interacting protein 1	Tor1aip1	20.0822	0.450638	+		Pum3	Q8BKS9	Pum3	Pumilio homolog 3	Pum3	18.5059	1.13788		+	Pdgfra	P26618	Pdgfra	Platelet-derived growth factor receptor alpha	Pdgfra	19.0836	0.564405				Q99JF5	Mvd	Diphosphomevalonate decarboxylase	Mvd	18.9587	0.0879178	+
Q99J10	Ctu1	Cytoplasmic tRNA 2-thiolation protein 1	Ctu1	20.8276	0.744914	+		Rab43	Q8CG50	Rab43	Ras-related protein Rab-43	Rab43	18.7789	0.539057			Pdia3	P27773	Pdia3	Protein disulfide-isomerase A3	Pdia3	25.2912	0.187438				Q99KQ4	Nampt	Nicotinamide phosphoribosyltransferase	Nampt	21.0958	0.528709	+
Q99JF5	Mvd	Diphosphomevalonate decarboxylase	Mvd	18.4952	0.390669	+		Rae1	Q8C570	Rae1	mRNA export factor	Rae1	18.9163	0.733119			Pdpn	Q62011	Pdpn	Podoplanin	Pdpn	19.9743	0.603132	+			Q99L45	Eif2s2	Eukaryotic translation initiation factor 2 subunit 2	Eif2s2	21.5634	0.233063	+
Q99KQ4	Nampt	Nicotinamide phosphoribosyltransferase	Nampt	21.0808	0.993897	+		Ralgapb	Q8BQZ4	Ralgapb	Ral GTPase-activating protein subunit beta	Ralgapb	18.3055	1.15571			Pelp1	Q9DBD5	Pelp1	Proline-, glutamic acid- and leucine-rich protein 1	Pelp1	18.2813	0.329357				Q99LL5	Pwp1	Periodic tryptophan protein 1 homolog	Pwp1	20.5266	1.17716	+
Q99L45	Eif2s2	Eukaryotic translation initiation factor 2 subunit 2	Eif2s2	21.3326	0.26322	+		Raver1	Q9CW46	Raver1	Ribonucleoprotein PTB-binding 1	Raver1	20.2413	0.450834			Pex16	Q91XC9	Pex16	Peroxisomal membrane protein PEX16	Pex16	18.2957	0.567179				Q99M51	Nck1	Cytoplasmic protein NCK1	Nck1	19.3219	0.764258	+
Q99LL5	Pwp1	Periodic tryptophan protein 1 homolog	Pwp1	19.5733	0.155675	+		Rbbp7	Q60973	Rbbp7	Histone-binding protein RBBP7	Rbbp7	19.9837	0.85223			Pglyrp1	O88593	Pglyrp1	Peptidoglycan recognition protein 1	Pglyrp1	20.8638	0.461584				Q99MK8	Grk2	Beta-adrenergic receptor kinase 1	Grk2	19.5208	0.676402	+
Q99M15	Pstpip2	Proline-serine-threonine phosphatase-interacting protein 2	Pstpip2	15.9461	1.00598	+		Rbm15	Q0VBL3	Rbm15	RNA-binding protein 15	Rbm15	18.9625	0.412329			Pi4k2a	Q2TBE6	Pi4k2a	Phosphatidylinositol 4-kinase type 2-alpha	Pi4k2a	18.4056	0.834623				Q99N57	Raf1	RAF proto-oncogene serine/threonine-protein kinase	Raf1	18.5597	0.372305	+
Q99M51	Nck1	Cytoplasmic protein NCK1	Nck1	19.4073	0.628948	+		Rcc1	Q8VE37	Rcc1	Regulator of chromosome condensation	Rcc1	22.2435	0.179292			Pigt	Q8BXQ2	Pigt	GPI transamidase component PIG-T	Pigt	19.1238	0.485291				Q99PG2	Ogfr	Opioid growth factor receptor	Ogfr	19.187	0.301692	+
Q99MK8	Grk2	Beta-adrenergic receptor kinase 1	Grk2	18.6336	0.410875	+		Rcn1	Q05186	Rcn1	Reticulocalbin-1	Rcn1	19.9212	0.645285			Plrg1	Q922V4	Plrg1	Pleiotropic regulator 1	Plrg1	19.4386	0.388379				Q9CQJ6	Denr	Density-regulated protein	Denr	20.7939	0.181597	+
Q99N57	Raf1	RAF proto-oncogene serine/threonine-protein kinase	Raf1	18.5956	0.7114	+		Relch	Q148V7	Relch	RAB11-binding protein RELCH	Relch	19.49	0.436774			Pnn	O35691	Pnn	Pinin	Pnn	20.2905	0.192199				Q9CQW9	Ifitm3	Interferon-induced transmembrane protein 3	Ifitm3	22.0798	1.65075	+
Q99PG2	Ogfr	Opioid growth factor receptor	Ogfr	19.4428	0.675635	+		Renbp	P82343	Renbp	N-acylglucosamine 2-epimerase	Renbp	18.6357	1.06283			Ppan	Q91YU8	Ppan	Suppressor of SWI4 1 homolog	Ppan	18.0192	0.375393		+		Q9CRY7	Gdpd1	Lysophospholipase D GDPD1	Gdpd1	20.2951	0.732632	+
Q9CQJ6	Denr	Density-regulated protein	Denr	20.9092	0.43014	+		Rnase4	Q9JJH1	Rnase4	Ribonuclease 4	Rnase4	18.6042	0.590034			Ppp1r14b	Q62084	Ppp1r14b	Protein phosphatase 1 regulatory subunit 14B	Ppp1r14b	19.1932	0.730695				Q9CZD3	Gars	Glycine--tRNA ligase	Gars	22.1877	0.732805	+
Q9CQW9	Ifitm3	Interferon-induced transmembrane protein 3	Ifitm3	20.9608	0.292001	+		Rnf40	Q3U319	Rnf40	E3 ubiquitin-protein ligase BRE1B	Rnf40	18.7342	1.3405			Ppp2r5d	Q91V89	Ppp2r5d	Serine/threonine-protein phosphatase 2A 56 kDa regulatory subunit	Ppp2r5d	18.7836	0.761726				Q9CZE3	Rab32	Ras-related protein Rab-32	Rab32	20.7428	0.763998	+
Q9CRY7	Gdpd1	Lysophospholipase D GDPD1	Gdpd1	20.8396	0.507131	+		Rpl10	Q6ZWV3	Rpl10	60S ribosomal protein L10	Rpl10	21.9226	0.274506			Prmt5	Q8CIG8	Prmt5	Protein arginine N-methyltransferase 5	Prmt5	21.3918	0.285578				Q9D0Q7	Mrpl45	39S ribosomal protein L45, mitochondrial	Mrpl45	19.5711	0.64273	+
Q9CZD3	Gars	Glycine--tRNA ligase	Gars	22.0292	0.268069	+		Rpl18a	P62717	Rpl18a	60S ribosomal protein L18a	Rpl18a	20.8022	0.706989			Prpf38b	Q80SY5	Prpf38b	Pre-mRNA-splicing factor 38B	Prpf38b	19.3528	0.238027				Q9D0R2	Tars	Threonine--tRNA ligase, cytoplasmic	Tars	22.178	0.302582	+
Q9CZE3	Rab32	Ras-related protein Rab-32	Rab32	20.1197	0.532024	+		Rpl21	O09167	Rpl21	60S ribosomal protein L21	Rpl21	22.9486	0.55355			Prps2	Q9CS42	Prps2	Ribose-phosphate pyrophosphokinase 2	Prps2	19.6963	0.32791				Q9D1M4	Eef1e1	Eukaryotic translation elongation factor 1 epsilon-1	Eef1e1	19.2383	0.971827	+
Q9D0Q7	Mrpl45	39S ribosomal protein L45, mitochondrial	Mrpl45	19.3128	0.541132	+		Rpl28	P41105	Rpl28	60S ribosomal protein L28	Rpl28	23.1437	0.767845			Prrc1	Q3UPH1	Prrc1	Protein PRRC1	Prrc1	20.3336	0.155854				Q9D281	Fam114a1	Protein Noxp20	Fam114a1	19.5813	0.509058	+
Q9D0R2	Tars	Threonine--tRNA ligase, cytoplasmic	Tars	22.2542	0.126287	+		Rpl37a	P61514	Rpl37a	60S ribosomal protein L37a	Rpl37a	20.9238	0.88436			Prrc2a	Q7TSC1	Prrc2a	Protein PRRC2A	Prrc2a	18.9544	0.356673				Q9D2Y4	Mlkl	Mixed lineage kinase domain-like protein	Mlkl	18.9032	0.591726	+
Q9D1M4	Eef1e1	Eukaryotic translation elongation factor 1 epsilon-1	Eef1e1	18.7847	0.226876	+		Rpl5	P47962	Rpl5	60S ribosomal protein L5	Rpl5	22.9615	0.351293			Psma2	P49722	Psma2	Proteasome subunit alpha type-2	Psma2	23.0968	0.447384				Q9D820	Prorsd1	Prolyl-tRNA synthetase associated domain-containing protein 1	Prorsd1	19.737	0.579071	+
Q9D281	Fam114a1	Protein Noxp20	Fam114a1	19.8256	0.609026	+		Rpl6	P47911	Rpl6	60S ribosomal protein L6	Rpl6	24.3238	0.357375			Psma6	Q9QUM9	Psma6	Proteasome subunit alpha type-6	Psma6	23.4092	0.286601				Q9D832	Dnajb4	DnaJ homolog subfamily B member 4	Dnajb4	19.3908	0.386142	+
Q9D2Y4	Mlkl	Mixed lineage kinase domain-like protein	Mlkl	18.766	0.508872	+		Rpl8	P62918	Rpl8	60S ribosomal protein L8	Rpl8	24.9746	0.470499			Psmb2	Q9R1P3	Psmb2	Proteasome subunit beta type-2	Psmb2	21.4252	0.483014				Q9D8C4	Ifi35	Interferon-induced 35 kDa protein homolog	Ifi35	20.0058	0.317605	+
Q9D620	Rab11fip1	Rab11 family-interacting protein 1	Rab11fip1	18.0142	0.624114	+		Rplp0	P14869	Rplp0	60S acidic ribosomal protein P0	Rplp0	22.5468	0.5268			Psmb8	P28063	Psmb8	Proteasome subunit beta type-8	Psmb8	20.7176	0.460275	+			Q9DAM7	Tmem263	Transmembrane protein 263	Tmem263	17.6581	0.656155	+
Q9D820	Prorsd1	Prolyl-tRNA synthetase associated domain-containing protein 1	Prorsd1	20.3588	0.686102	+		Rps13	P62301	Rps13	40S ribosomal protein S13	Rps13	24.2486	0.409896			Psme4	Q5SSW2	Psme4	Proteasome activator complex subunit 4	Psme4	18.5945	0.508869				Q9DBC3	Cmtr1	Cap-specific mRNA (nucleoside-2'-O-)-methyltransferase 1	Cmtr1	19.8186	0.22332	+
Q9D832	Dnajb4	DnaJ homolog subfamily B member 4	Dnajb4	19.9062	0.290004	+		Rps23	P62267	Rps23	40S ribosomal protein S23	Rps23	22.4044	0.946611			Psmg1	Q9JK23	Psmg1	Proteasome assembly chaperone 1	Psmg1	19.9911	0.119965				Q9DBK7	Uba7	MCG18845, isoform CRA_d	Uba7	19.8442	0.4239	+
Q9D8C4	Ifi35	Interferon-induced 35 kDa protein homolog	Ifi35	19.7203	0.312555	+		Rps26	P62855	Rps26	40S ribosomal protein S26	Rps26	21.2738	1.15152			Ptk6	Q64434	Ptk6	Protein-tyrosine kinase 6	Ptk6	18.4299	2.65717				Q9DBR3	Armc8	Armadillo repeat-containing protein 8	Armc8	19.4104	0.357459	+
Q9DAM7	Tmem263	Transmembrane protein 263	Tmem263	17.1136	0.180047	+		Rps7	P62082	Rps7	40S ribosomal protein S7	Rps7	23.8983	0.608447			Pum3	Q8BKS9	Pum3	Pumilio homolog 3	Pum3	19.4289	0.323551		+		Q9DBX3	Susd2	Sushi domain-containing protein 2	Susd2	22.2236	0.91771	+
Q9DBC3	Cmtr1	Cap-specific mRNA (nucleoside-2'-O-)-methyltransferase 1	Cmtr1	19.4688	0.469181	+		Ruvbl1	P60122	Ruvbl1	RuvB-like 1	Ruvbl1	20.5254	0.365269			Rab43	Q8CG50	Rab43	Ras-related protein Rab-43	Rab43	18.9449	0.469511				Q9DCE9	Igtp	Interferon gamma-induced GTPase	Igtp	19.8144	1.13669	+
Q9DBK7	Uba7	MCG18845, isoform CRA_d	Uba7	19.7253	1.12604	+		Safb	D3YXK2	Safb	Scaffold attachment factor B1	Safb	20.5726	0.229585			Rae1	Q8C570	Rae1	mRNA export factor	Rae1	18.7822	0.317045				Q9ERI2	Rab27a	Ras-related protein Rab-27A	Rab27a	20.0263	0.436971	+
Q9DBR3	Armc8	Armadillo repeat-containing protein 8	Armc8	19.081	0.298036	+		Sco2	Q8VCL2	Sco2	Protein SCO2 homolog, mitochondrial	Sco2	18.5205	0.307381			Ralgapb	Q8BQZ4	Ralgapb	Ral GTPase-activating protein subunit beta	Ralgapb	18.2795	1.2537				Q9ET26	Rnf114	E3 ubiquitin-protein ligase RNF114	Rnf114	20.1631	0.722908	+
Q9DBS9	Osbpl3	Oxysterol-binding protein-related protein 3	Osbpl3	17.3178	0.347974	+		Sec16a	A2AIX1	Sec16a	Protein transport protein sec16	Sec16a	19.3946	0.468341			Raver1	Q9CW46	Raver1	Ribonucleoprotein PTB-binding 1	Raver1	20.1722	0.318804				Q9JIK5	Ddx21	Nucleolar RNA helicase 2	Ddx21	21.7478	0.301731	+
Q9DBX3	Susd2	Sushi domain-containing protein 2	Susd2	22.1164	0.134397	+		Sec23b	Q9D662	Sec23b	Protein transport protein Sec23B	Sec23b	21.5476	0.46495			Rbbp7	Q60973	Rbbp7	Histone-binding protein RBBP7	Rbbp7	19.926	0.854853				Q9JIY5	Htra2	Serine protease HTRA2, mitochondrial	Htra2	19.5321	0.856728	+
Q9DCE9	Igtp	Interferon gamma-induced GTPase	Igtp	17.8778	0.431342	+		Sel1l	Q9Z2G6	Sel1l	Protein sel-1 homolog 1	Sel1l	19.627	0.71623			Rbm15	Q0VBL3	Rbm15	RNA-binding protein 15	Rbm15	18.9324	0.373276				Q9JM13	Rabgef1	Rab5 GDP/GTP exchange factor	Rabgef1	18.9534	0.904708	+
Q9ERI2	Rab27a	Ras-related protein Rab-27A	Rab27a	20.1677	0.983263	+		Serbp1	Q9CY58	Serbp1	Plasminogen activator inhibitor 1 RNA-binding protein	Serbp1	22.0776	0.40101			Rcc1	Q8VE37	Rcc1	Regulator of chromosome condensation	Rcc1	22.4645	0.178876				Q9JM51	Ptges	Prostaglandin E synthase	Ptges	19.8701	1.09985	+
Q9ET26	Rnf114	E3 ubiquitin-protein ligase RNF114	Rnf114	20.1119	0.53444	+		Serpinb9	O08797	Serpinb9	SPI6	Serpinb9	18.8023	1.46777			Rcn1	Q05186	Rcn1	Reticulocalbin-1	Rcn1	20.2868	0.492976				Q9JMH6	Txnrd1	Thioredoxin reductase 1, cytoplasmic	Txnrd1	22.1265	0.632991	+
Q9JI90	Rnf14	E3 ubiquitin-protein ligase RNF14	Rnf14	18.3891	0.279625	+		Set	Q9EQU5	Set	Protein SET	Set	22.7696	0.469588			Rel	P15307	Rel	Proto-oncogene c-Rel	Rel	19.4184	0.239099	+			Q9QUH0	Glrx	Glutaredoxin-1	Glrx	18.9421	1.7903	+
Q9JIB4	Gtf2h2	General transcription factor IIH subunit 2	Gtf2h2	18.2553	0.902545	+		Sf3a1	Q8K4Z5	Sf3a1	Splicing factor 3A subunit 1	Sf3a1	19.8819	0.584155			Relch	Q148V7	Relch	RAB11-binding protein RELCH	Relch	19.1572	0.339429				Q9QY24	Zbp1	Z-DNA-binding protein 1	Zbp1	18.8668	0.831738	+
Q9JIK5	Ddx21	Nucleolar RNA helicase 2	Ddx21	21.0498	0.374772	+		Sigmar1	O55242	Sigmar1	Sigma non-opioid intracellular receptor 1	Sigmar1	20.0457	1.13899			Renbp	P82343	Renbp	N-acylglucosamine 2-epimerase	Renbp	19.574	0.79183				Q9QYI5	Dnajb2	DnaJ homolog subfamily B member 2	Dnajb2	18.5265	0.406515	+
Q9JIY5	Htra2	Serine protease HTRA2, mitochondrial	Htra2	19.2998	0.878734	+		Sin3a	Q60520	Sin3a	Paired amphipathic helix protein Sin3a	Sin3a	19.0261	0.146464			Rftn1	Q6A0D4	Rftn1	Raftlin	Rftn1	18.1436	0.467089				Q9QZ85	Iigp1	Interferon-inducible GTPase 1	Iigp1	19.836	1.5785	+
Q9JJF9	Sppl2a	Signal peptide peptidase-like 2A	Sppl2a	19.4683	0.482336	+		Slc12a2	P55012	Slc12a2	Solute carrier family 12 member 2	Slc12a2	22.3836	0.336794			Rnase4	Q9JJH1	Rnase4	Ribonuclease 4	Rnase4	18.8676	0.626545				Q9QZD8	Slc25a10	Mitochondrial dicarboxylate carrier	Slc25a10	20.4159	0.708533	+
Q9JKL4	Ndufaf3	NADH dehydrogenase [ubiquinone] 1 alpha subcomplex assembly factor 3	Ndufaf3	18.4869	0.284515	+		Slc12a7	Q9WVL3	Slc12a7	Solute carrier family 12 member 7	Slc12a7	20.1418	0.485852			Rnf40	Q3U319	Rnf40	E3 ubiquitin-protein ligase BRE1B	Rnf40	19.0305	0.108736				Q9R233	Tapbp	Tapasin	Tapbp	21.3495	0.754552	+
Q9JL56	Gde1	Glycerophosphodiester phosphodiesterase 1	Gde1	16.9492	0.833648	+		Slc2a1	P17809	Slc2a1	Solute carrier family 2, facilitated glucose transporter member 1	Slc2a1	20.1312	0.584699			Rpl10	Q6ZWV3	Rpl10	60S ribosomal protein L10	Rpl10	21.8906	0.483835				Q9WTK5	Nfkb2	Nuclear factor NF-kappa-B p100 subunit	Nfkb2	19.5763	0.506562	+
Q9JM13	Rabgef1	Rab5 GDP/GTP exchange factor	Rabgef1	18.7229	0.299355	+		Smc1a	Q9CU62	Smc1a	Structural maintenance of chromosomes protein 1A	Smc1a	20.7253	0.157341			Rpl18a	P62717	Rpl18a	60S ribosomal protein L18a	Rpl18a	20.631	0.522063				Q9WUU8	Tnip1	TNFAIP3-interacting protein 1	Tnip1	18.6174	0.121894	+
Q9JM51	Ptges	Prostaglandin E synthase	Ptges	18.2977	0.901754	+		Snap29	Q9ERB0	Snap29	Synaptosomal-associated protein 29	Snap29	19.1117	0.512223			Rpl21	O09167	Rpl21	60S ribosomal protein L21	Rpl21	22.4444	0.504066				Q9WV92	Epb41l3	Band 4.1-like protein 3	Epb41l3	19.2027	0.589449	+
Q9JMH6	Txnrd1	Thioredoxin reductase 1, cytoplasmic	Txnrd1	22.3379	0.24891	+		Snrpg	P62309	Snrpg	Small nuclear ribonucleoprotein G	Snrpg	23.2235	0.458475			Rpl28	P41105	Rpl28	60S ribosomal protein L28	Rpl28	22.8245	0.727106				Q9WVB0	Rbpms	RNA-binding protein with multiple splicing	Rbpms	21.0364	0.69042	+
Q9QUH0	Glrx	Glutaredoxin-1	Glrx	20.2028	1.16518	+		Snx3	O70492	Snx3	Sorting nexin-3	Snx3	21.5664	0.313355			Rpl37a	P61514	Rpl37a	60S ribosomal protein L37a	Rpl37a	21.1818	0.875316				Q9WVK4	Ehd1	EH domain-containing protein 1	Ehd1	21.5095	0.950733	+
Q9QUK4	Naip2	Baculoviral IAP repeat-containing protein 1b	Naip2	17.1488	0.108824	+		Sorl1	O88307	Sorl1	Sortilin-related receptor	Sorl1	19.4733	0.752027			Rpl5	P47962	Rpl5	60S ribosomal protein L5	Rpl5	23.0059	0.413664				Q9WVL2	Stat2	Signal transducer and activator of transcription 2	Stat2	17.7215	0.622385	+
Q9QYF1	Rdh11	Retinol dehydrogenase 11	Rdh11	18.5483	0.398128	+		Spcs2	Q9CYN2	Spcs2	Signal peptidase complex subunit 2	Spcs2	22.3162	0.369077			Rpl6	P47911	Rpl6	60S ribosomal protein L6	Rpl6	24.3845	0.364329				Q9Z0E6	Gbp2	Guanylate-binding protein 2	Gbp2	19.8756	0.934021	+
Q9QYI5	Dnajb2	DnaJ homolog subfamily B member 2	Dnajb2	18.4248	0.506708	+		Spink5	Q148R4	Spink5	Serine peptidase inhibitor, Kazal type 5	Spink5	19.3303	0.285285			Rpl8	P62918	Rpl8	60S ribosomal protein L8	Rpl8	24.7313	0.421235				Q9Z2B9	Rps6ka4	Ribosomal protein S6 kinase alpha-4	Rps6ka4	18.84	0.525987	+
Q9QZ85	Iigp1	Interferon-inducible GTPase 1	Iigp1	17.5849	0.767934	+		Sptlc1	O35704	Sptlc1	Serine palmitoyltransferase 1	Sptlc1	19.7486	0.378245			Rplp0	P14869	Rplp0	60S acidic ribosomal protein P0	Rplp0	22.942	0.280019				A0A0A6YY83	Pcdh7	Protocadherin 7	Pcdh7	18.8121	1.28012		+
Q9QZD8	Slc25a10	Mitochondrial dicarboxylate carrier	Slc25a10	21.2042	0.129278	+		Srgap2	Q91Z67	Srgap2	SLIT-ROBO Rho GTPase-activating protein 2	Srgap2	19.3785	0.489376			Rps13	P62301	Rps13	40S ribosomal protein S13	Rps13	24.6844	0.241801				A2A8Z1	Osbpl9	Oxysterol-binding protein-related protein 9	Osbpl9	17.9662	0.91404		+
Q9R118	Htra1	Serine protease HTRA1	Htra1	16.2241	1.26313	+		Srprb	P47758	Srprb	Signal recognition particle receptor subunit beta	Srprb	19.4848	0.356556			Rps23	P62267	Rps23	40S ribosomal protein S23	Rps23	22.5339	0.863824				A6H8H2	Dennd4c	DENN domain-containing protein 4C	Dennd4c	19.9073	0.386523		+
Q9R233	Tapbp	Tapasin	Tapbp	20.6043	0.619434	+		Srsf5	O35326	Srsf5	Serine/arginine-rich splicing factor 5	Srsf5	21.0404	0.777854			Rps26	P62855	Rps26	40S ribosomal protein S26	Rps26	20.9139	0.730565				B1AZP2	Dlgap4	Disks large-associated protein 4	Dlgap4	18.5278	0.544314		+
Q9WTK5	Nfkb2	Nuclear factor NF-kappa-B p100 subunit	Nfkb2	18.9868	0.218949	+		Srsf7	Q8BL97	Srsf7	Serine/arginine-rich splicing factor 7	Srsf7	23.2543	0.0967896			Rps7	P62082	Rps7	40S ribosomal protein S7	Rps7	23.5582	0.50972				B2RQC6	Cad	CAD protein	Cad	20.841	0.479639		+
Q9WUU8	Tnip1	TNFAIP3-interacting protein 1	Tnip1	18.8823	0.632397	+		Ssr4	Q62186	Ssr4	Translocon-associated protein subunit delta	Ssr4	22.4785	0.462271			Ruvbl1	P60122	Ruvbl1	RuvB-like 1	Ruvbl1	20.383	0.271703				D3Z7P3	Gls	Glutaminase kidney isoform, mitochondrial	Gls	20.0184	0.649523		+
Q9WV86	Katna1	Katanin p60 ATPase-containing subunit A1	Katna1	17.3535	0.756989	+		Stip1	Q60864	Stip1	Stress-induced-phosphoprotein 1	Stip1	22.9996	0.210246	+		S100a9	P31725	S100a9	Protein S100-A9	S100a9	25.3072	1.06667				E9PWR4	Dip2c	Disco-interacting protein 2 homolog C	Dip2c	17.8559	0.504768		+
Q9WV92	Epb41l3	Band 4.1-like protein 3	Epb41l3	19.8894	0.43184	+		Stx16	Q8BVI5	Stx16	Syntaxin-16	Stx16	17.8911	1.3132			Safb	D3YXK2	Safb	Scaffold attachment factor B1	Safb	20.2752	0.174081				E9PYG6	Rasa1	RAS p21 protein activator 1	Rasa1	18.2401	0.731335		+
Q9WVB0	Rbpms	RNA-binding protein with multiple splicing	Rbpms	20.8428	0.389863	+		Supt5h	O55201	Supt5h	Transcription elongation factor SPT5	Supt5h	19.9614	0.27567			Sco2	Q8VCL2	Sco2	Protein SCO2 homolog, mitochondrial	Sco2	18.1502	0.366757				E9Q0S6	Tns1	Tensin 1	Tns1	22.6377	0.337756		+
Q9WVK4	Ehd1	EH domain-containing protein 1	Ehd1	22.1146	0.472363	+		Sympk	Q80X82	Sympk	Symplekin	Sympk	19.1245	0.695931			Sec16a	A2AIX1	Sec16a	Protein transport protein sec16	Sec16a	19.3002	0.27852				E9Q5C9	Nolc1	Nucleolar and coiled-body phosphoprotein 1	Nolc1	19.9496	0.65402		+
Q9WVL2	Stat2	Signal transducer and activator of transcription 2	Stat2	17.6092	0.228727	+		Syn2	Q64332	Syn2	Synapsin-2	Syn2	19.159	0.945218			Sec23b	Q9D662	Sec23b	Protein transport protein Sec23B	Sec23b	21.8765	0.240199				E9Q616	Ahnak	AHNAK nucleoprotein (desmoyokin)	Ahnak	24.3571	0.307068		+
Q9Z0E6	Gbp2	Guanylate-binding protein 2	Gbp2	18.8149	0.275668	+		Tbl1xr1	Q8BHJ5	Tbl1xr1	F-box-like/WD repeat-containing protein TBL1XR1	Tbl1xr1	18.7267	0.888932		+	Sel1l	Q9Z2G6	Sel1l	Protein sel-1 homolog 1	Sel1l	19.8654	0.340815				E9Q7G0	Numa1	Nuclear mitotic apparatus protein 1	Numa1	21.42	0.270324		+
Q9Z2B9	Rps6ka4	Ribosomal protein S6 kinase alpha-4	Rps6ka4	18.6124	0.177182	+		Thoc1	Q8R3N6	Thoc1	THO complex subunit 1	Thoc1	18.1279	3.11352			Serbp1	Q9CY58	Serbp1	Plasminogen activator inhibitor 1 RNA-binding protein	Serbp1	22.0718	0.179235				E9QAS7	Inpp5a	Inositol polyphosphate-5-phosphatase A	Inpp5a	18.2192	0.831861		+
A0A0A6YY83	Pcdh7	Protocadherin 7	Pcdh7	18.4571	0.361381		+	Thoc6	Q5U4D9	Thoc6	THO complex subunit 6 homolog	Thoc6	19.6457	0.550655			Serpinb9	O08797	Serpinb9	SPI6	Serpinb9	19.3866	0.355465				O08583	Alyref	THO complex subunit 4	Alyref	21.7397	1.01036		+
A2A8Z1	Osbpl9	Oxysterol-binding protein-related protein 9	Osbpl9	18.7878	0.405785		+	Tmem119	Q8R138	Tmem119	Transmembrane protein 119	Tmem119	18.7911	0.954527	+		Set	Q9EQU5	Set	Protein SET	Set	23.1008	0.436956				O08738	Casp6	Caspase-6	Casp6	19.2933	0.392381		+
A2AJ88	Pnpla7	Patatin-like phospholipase domain-containing protein 7	Pnpla7	18.8904	0.586757		+	Tmem214	Q8BM55	Tmem214	Transmembrane protein 214	Tmem214	20.6074	0.53473			Sf3a1	Q8K4Z5	Sf3a1	Splicing factor 3A subunit 1	Sf3a1	20.2399	0.280522				O35566	Cd151	CD151 antigen	Cd151	21.0777	0.602726		+
A6H8H2	Dennd4c	DENN domain-containing protein 4C	Dennd4c	19.9941	0.381553		+	Tmpo	Q61033	Tmpo	Lamina-associated polypeptide 2, isoforms alpha/zeta	Tmpo	22.0063	0.523069			Sh3kbp1	Q8R550	Sh3kbp1	SH3 domain-containing kinase-binding protein 1	Sh3kbp1	18.5916	0.571091				O35678	Mgll	Monoglyceride lipase	Mgll	20.2477	0.61661		+
B1AZP2	Dlgap4	Disks large-associated protein 4	Dlgap4	18.6757	0.167182		+	Tmsb4x	P20065	Tmsb4x	Thymosin beta-4	Tmsb4x	21.1106	0.633947			Sigmar1	O55242	Sigmar1	Sigma non-opioid intracellular receptor 1	Sigmar1	20.2312	0.349607				O35744	Chil3	Chitinase-like protein 3	Chil3	21.3057	1.58286		+
B2RQC6	Cad	CAD protein	Cad	20.3574	0.456903		+	Tpt1	P63028	Tpt1	Translationally-controlled tumor protein	Tpt1	21.7193	0.404443			Sin3a	Q60520	Sin3a	Paired amphipathic helix protein Sin3a	Sin3a	19.1249	0.301798				O54890	Itgb3	Integrin beta-3	Itgb3	19.8313	0.597047		+
D3Z7P3	Gls	Glutaminase kidney isoform, mitochondrial	Gls	20.4408	0.656461		+	Trappc2l	Q9JME7	Trappc2l	Trafficking protein particle complex subunit 2-like protein	Trappc2l	18.8865	0.643161			Slc12a2	P55012	Slc12a2	Solute carrier family 12 member 2	Slc12a2	22.1933	0.565427				O70145	Ncf2	Neutrophil cytosol factor 2	Ncf2	19.7911	1.04674		+
E9PWR4	Dip2c	Disco-interacting protein 2 homolog C	Dip2c	18.7448	0.0832349		+	Trappc8	E9PWG2	Trappc8	Trafficking protein particle complex 8	Trappc8	19.0107	0.744866			Slc12a7	Q9WVL3	Slc12a7	Solute carrier family 12 member 7	Slc12a7	19.7848	0.182615				O70309	Itgb5	Integrin beta-5	Itgb5	19.0729	1.32779		+
E9PYG6	Rasa1	RAS p21 protein activator 1	Rasa1	18.6689	0.166623		+	Triobp	Q99KW3	Triobp	TRIO and F-actin-binding protein	Triobp	19.3793	0.598223			Slc2a1	P17809	Slc2a1	Solute carrier family 2, facilitated glucose transporter member 1	Slc2a1	20.6105	0.685252				O88428	Papss2	Bifunctional 3'-phosphoadenosine 5'-phosphosulfate synthase 2	Papss2	21.6633	0.846044		+
E9PZQ0	Ryr1	Ryanodine receptor 1	Ryr1	20.3857	0.988706		+	Tsn	Q62348	Tsn	Translin	Tsn	20.9171	0.423544			Smc1a	Q9CU62	Smc1a	Structural maintenance of chromosomes protein 1A	Smc1a	20.8113	0.131089				O88455	Dhcr7	7-dehydrocholesterol reductase	Dhcr7	21.2225	0.97991		+
E9Q0S6	Tns1	Tensin 1	Tns1	23.0889	0.403806		+	Ttc37	F8VPK0	Ttc37	Tetratricopeptide repeat domain 37	Ttc37	19.0845	0.71108			Snap29	Q9ERB0	Snap29	Synaptosomal-associated protein 29	Snap29	19.1215	0.214258				O88844	Idh1	Isocitrate dehydrogenase [NADP] cytoplasmic	Idh1	23.4669	0.594408		+
E9Q5C9	Nolc1	Nucleolar and coiled-body phosphoprotein 1	Nolc1	19.5788	0.453497		+	Txlna	Q6PAM1	Txlna	Alpha-taxilin	Txlna	18.7935	0.697517			Snrpg	P62309	Snrpg	Small nuclear ribonucleoprotein G	Snrpg	22.9182	0.690664				O88876	Dhrs3	Short-chain dehydrogenase/reductase 3	Dhrs3	19.7504	1.33061		+
E9Q616	Ahnak	AHNAK nucleoprotein (desmoyokin)	Ahnak	24.8288	0.14765		+	Txndc12	Q9CQU0	Txndc12	Thioredoxin domain-containing protein 12	Txndc12	21.2378	0.396128			Snx3	O70492	Snx3	Sorting nexin-3	Snx3	21.3748	0.380086				O88958	Gnpda1	Glucosamine-6-phosphate isomerase 1	Gnpda1	18.8152	0.796836		+
E9Q7G0	Numa1	Nuclear mitotic apparatus protein 1	Numa1	21.2516	0.322185		+	Tyms	P07607	Tyms	Thymidylate synthase	Tyms	19.2983	0.685634			Sorl1	O88307	Sorl1	Sortilin-related receptor	Sorl1	19.4313	0.332675				P01910	H2-Aa	H-2 class II histocompatibility antigen, A-K alpha chain	H2-Aa	19.5443	1.03577		+
E9QAS7	Inpp5a	Inositol polyphosphate-5-phosphatase A	Inpp5a	19.3133	0.29379		+	U2surp	Q6NV83	U2surp	U2 snRNP-associated SURP motif-containing protein	U2surp	20.1489	0.425963			Spcs2	Q9CYN2	Spcs2	Signal peptidase complex subunit 2	Spcs2	22.5898	0.37815				P04370	Mbp	Myelin basic protein	Mbp	17.0198	1.34187		+
O08583	Alyref	THO complex subunit 4	Alyref	21.96	0.566591		+	Ubap2l	Q80X50	Ubap2l	Ubiquitin-associated protein 2-like	Ubap2l	19.3993	0.414433			Spink5	Q148R4	Spink5	Serine peptidase inhibitor, Kazal type 5	Spink5	18.4142	1.30079				P04441	Cd74	H-2 class II histocompatibility antigen gamma chain	Cd74	19.1823	0.657566		+
O08738	Casp6	Caspase-6	Casp6	18.9708	0.432802		+	Ube2r2	Q6ZWZ2	Ube2r2	Ubiquitin-conjugating enzyme E2 R2	Ube2r2	19.8167	0.352928			Spn	P15702	Spn	Leukosialin	Spn	17.4809	0.710729				P08003	Pdia4	Protein disulfide-isomerase A4	Pdia4	21.8514	0.711663		+
O35566	Cd151	CD151 antigen	Cd151	20.9286	0.375118		+	Ubxn2b	Q0KL01	Ubxn2b	UBX domain-containing protein 2B	Ubxn2b	20.263	0.515283			Sptlc1	O35704	Sptlc1	Serine palmitoyltransferase 1	Sptlc1	19.5891	0.433629				P0C0S6;Q3THW5	H2afv;H2afz	Histone H2A.Z	H2afv	23.2095	0.765628		+
O35678	Mgll	Monoglyceride lipase	Mgll	20.7229	0.65861		+	Upf3b	Q3ULL6	Upf3b	UPF3 regulator of nonsense transcripts homolog B (yeast)	Upf3b	17.2528	1.1121			Srgap2	Q91Z67	Srgap2	SLIT-ROBO Rho GTPase-activating protein 2	Srgap2	19.6175	0.640292				P10107	Anxa1	Annexin A1	Anxa1	25.1784	0.437708		+
O54890	Itgb3	Integrin beta-3	Itgb3	20.0523	0.266524		+	Usp4	P35123	Usp4	Ubiquitin carboxyl-terminal hydrolase 4	Usp4	19.2783	0.692448			Srprb	P47758	Srprb	Signal recognition particle receptor subunit beta	Srprb	19.8046	0.296618				P11103	Parp1	Poly [ADP-ribose] polymerase 1	Parp1	19.5304	0.716992		+
O70145	Ncf2	Neutrophil cytosol factor 2	Ncf2	17.3962	0.510673		+	Utp20	Q5XG71	Utp20	Small subunit processome component 20 homolog	Utp20	17.8935	0.841373			Srsf5	O35326	Srsf5	Serine/arginine-rich splicing factor 5	Srsf5	21.0765	0.51223				P11276	Fn1	Fibronectin	Fn1	24.3612	0.534643		+
O70309	Itgb5	Integrin beta-5	Itgb5	18.9558	0.242087		+	Vapa	Q9WV55	Vapa	Vesicle-associated membrane protein-associated protein A	Vapa	22.0091	0.29279			Srsf7	Q8BL97	Srsf7	Serine/arginine-rich splicing factor 7	Srsf7	23.1662	0.295861				P12265	Gusb	Beta-glucuronidase	Gusb	20.308	1.04211		+
O88428	Papss2	Bifunctional 3'-phosphoadenosine 5'-phosphosulfate synthase 2	Papss2	21.817	0.401289		+	Vcan	Q62059	Vcan	Versican core protein	Vcan	21.7453	0.49596	+		Ssr4	Q62186	Ssr4	Translocon-associated protein subunit delta	Ssr4	22.2874	0.740955				P13808	Slc4a2	Anion exchange protein 2	Slc4a2	18.4391	0.308219		+
O88455	Dhcr7	7-dehydrocholesterol reductase	Dhcr7	21.4531	0.240556		+	Vps4b	P46467	Vps4b	Vacuolar protein sorting-associated protein 4B	Vps4b	20.5051	0.373718			Stip1	Q60864	Stip1	Stress-induced-phosphoprotein 1	Stip1	23.1233	0.133314	+			P13864	Dnmt1	DNA (cytosine-5)-methyltransferase 1	Dnmt1	19.6202	0.692487		+
O88844	Idh1	Isocitrate dehydrogenase [NADP] cytoplasmic	Idh1	23.4242	0.129696		+	Vti1a	O89116	Vti1a	Vesicle transport through interaction with t-SNAREs homolog 1A	Vti1a	18.7659	0.29702	+		Stx16	Q8BVI5	Stx16	Syntaxin-16	Stx16	17.6451	0.895908				P14733	Lmnb1	Lamin-B1	Lmnb1	24.3484	0.386677		+
O88876	Dhrs3	Short-chain dehydrogenase/reductase 3	Dhrs3	18.4806	0.531785		+	Vti1b	O88384	Vti1b	Vesicle transport through interaction with t-SNAREs homolog 1B	Vti1b	20.2472	0.653922			Supt5h	O55201	Supt5h	Transcription elongation factor SPT5	Supt5h	20.0134	0.240933				P15105	Glul	Glutamine synthetase	Glul	20.855	0.894851		+
O88958	Gnpda1	Glucosamine-6-phosphate isomerase 1	Gnpda1	18.9823	0.285422		+	Wars	P32921	Wars	Tryptophan--tRNA ligase, cytoplasmic	Wars	21.9111	0.419243	+		Sympk	Q80X82	Sympk	Symplekin	Sympk	19.0787	0.187749				P18654	Rps6ka3	Ribosomal protein S6 kinase alpha-3	Rps6ka3	20.8279	0.614421		+
P01910	H2-Aa	H-2 class II histocompatibility antigen, A-K alpha chain	H2-Aa	19.2531	0.759962		+	Wdr82	Q8BFQ4	Wdr82	WD repeat-containing protein 82	Wdr82	19.4849	0.329931			Syn2	Q64332	Syn2	Synapsin-2	Syn2	19.1504	0.630753				P18828	Sdc1	Syndecan-1	Sdc1	21.5374	0.797955		+
P04370	Mbp	Myelin basic protein	Mbp	19.0933	0.707906		+	Xpo4	Q9ESJ0	Xpo4	Exportin-4	Xpo4	18.7548	0.692301			Tbl1xr1	Q8BHJ5	Tbl1xr1	F-box-like/WD repeat-containing protein TBL1XR1	Tbl1xr1	18.6917	0.45478		+		P22437	Ptgs1	Prostaglandin G/H synthase 1	Ptgs1	21.2818	0.695093		+
P04441	Cd74	H-2 class II histocompatibility antigen gamma chain	Cd74	18.1982	1.08601		+	Xrn2	Q9DBR1	Xrn2	5'-3' exoribonuclease 2	Xrn2	20.6637	0.464823			Thoc1	Q8R3N6	Thoc1	THO complex subunit 1	Thoc1	18.5467	1.79567				P23198	Cbx3	Chromobox protein homolog 3	Cbx3	21.4091	0.877023		+
P06797	Ctsl	Cathepsin L1	Ctsl	16.0269	1.31899		+	Ythdc1	E9Q5K9	Ythdc1	YTH domain-containing protein 1	Ythdc1	18.5752	0.540077			Thoc6	Q5U4D9	Thoc6	THO complex subunit 6 homolog	Thoc6	19.8532	0.207729				P26039	Tln1	Talin-1	Tln1	24.0856	0.326302		+
P08003	Pdia4	Protein disulfide-isomerase A4	Pdia4	21.7963	0.217882		+	Zc3h15	Q3TIV5	Zc3h15	Zinc finger CCCH domain-containing protein 15	Zc3h15	19.829	0.410969			Tmem119	Q8R138	Tmem119	Transmembrane protein 119	Tmem119	19.526	0.512733	+			P27784	Ccl6	C-C motif chemokine 6	Ccl6	19.7262	0.445649		+
P0C0S6;Q3THW5	H2afv;H2afz	Histone H2A.Z	H2afv	23.5558	0.703223		+	Zc3hav1	Q3UPF5	Zc3hav1	Zinc finger CCCH-type antiviral protein 1	Zc3hav1	19.7125	0.195545			Tmem214	Q8BM55	Tmem214	Transmembrane protein 214	Tmem214	20.5035	0.376061				P28078	H2-DMa	Class II histocompatibility antigen, M alpha chain	H2-DMa	21.1561	0.873771		+
P10107	Anxa1	Annexin A1	Anxa1	24.6433	0.173288		+	Znfx1	Q8R151	Znfx1	NFX1-type zinc finger-containing protein 1	Znfx1	18.4858	0.289476	+		Tmem30b	Q8BHG3	Tmem30b	Cell cycle control protein 50B	Tmem30b	17.7905	2.62383				P28271	Aco1	Cytoplasmic aconitate hydratase	Aco1	21.8914	0.739821		+
P11103	Parp1	Poly [ADP-ribose] polymerase 1	Parp1	19.2892	0.224569		+	Znrf2	Q71FD5	Znrf2	E3 ubiquitin-protein ligase ZNRF2	Znrf2	18.7802	1.07246		+	Tmpo	Q61033	Tmpo	Lamina-associated polypeptide 2, isoforms alpha/zeta	Tmpo	21.9355	0.360811				P28352	Apex1	DNA-(apurinic or apyrimidinic site) lyase	Apex1	22.2339	0.687315		+
P11276	Fn1	Fibronectin	Fn1	24.1248	0.330646		+	#N/A	A0A286YCV9	Kif13b	Kinesin family member 13B	Kif13b	21.0653	0.237522	+		Tmsb4x	P20065	Tmsb4x	Thymosin beta-4	Tmsb4x	21.7646	0.539929				P28658	Atxn10	Ataxin-10	Atxn10	18.7024	1.10122		+
P12265	Gusb	Beta-glucuronidase	Gusb	19.9798	0.582791		+	#N/A	A2ASQ1	Agrn	Agrin	Agrn	20.0502	0.550519	+		Tnip1	Q9WUU8	Tnip1	TNFAIP3-interacting protein 1	Tnip1	18.6554	0.431725	+			P29387	Gnb4	Guanine nucleotide-binding protein subunit beta-4	Gnb4	18.7822	1.07137		+
P13864	Dnmt1	DNA (cytosine-5)-methyltransferase 1	Dnmt1	18.9382	0.142885		+	#N/A	E9Q236	Abcc4	ATP-binding cassette, sub-family C (CFTR/MRP), member 4	Abcc4	18.2499	0.729635	+		Tpt1	P63028	Tpt1	Translationally-controlled tumor protein	Tpt1	21.8783	0.359003				P35979	Rpl12	60S ribosomal protein L12	Rpl12	21.5239	0.549163		+
P14733	Lmnb1	Lamin-B1	Lmnb1	24.1894	0.103215		+	#N/A	E9QAM5	Helz2	Helicase with zinc finger domain 2	Helz2	18.3669	0.683038	+		Trappc2l	Q9JME7	Trappc2l	Trafficking protein particle complex subunit 2-like protein	Trappc2l	18.4658	0.213461				P38060	Hmgcl	Hydroxymethylglutaryl-CoA lyase, mitochondrial	Hmgcl	20.4783	0.614694		+
P15105	Glul	Glutamine synthetase	Glul	21.571	0.614063		+	#N/A	G3UZ78	Adgb	Androglobin	Adgb	22.5558	0.951191	+		Trappc8	E9PWG2	Trappc8	Trafficking protein particle complex 8	Trappc8	18.9787	0.39027				P40240	Cd9	CD9 antigen	Cd9	21.4643	0.448788		+
P18654	Rps6ka3	Ribosomal protein S6 kinase alpha-3	Rps6ka3	20.5094	0.499875		+	#N/A	H3BJD6	Ppp1r9a	Protein phosphatase 1, regulatory subunit 9A	Ppp1r9a	18.6236	1.29791	+		Triobp	Q99KW3	Triobp	TRIO and F-actin-binding protein	Triobp	19.2801	0.547961				P41245	Mmp9	Matrix metalloproteinase-9	Mmp9	19.4843	0.988874		+
P18828	Sdc1	Syndecan-1	Sdc1	20.6538	0.296958		+	#N/A	O08528	Hk2	Hexokinase-2	Hk2	21.6791	0.659666	+		Trmt2a	Q8BNV1	Trmt2a	tRNA (uracil-5-)-methyltransferase homolog A	Trmt2a	18.6423	0.233874				P45952	Acadm	Medium-chain specific acyl-CoA dehydrogenase, mitochondrial	Acadm	22.3599	0.480123		+
P22437	Ptgs1	Prostaglandin G/H synthase 1	Ptgs1	20.8143	0.159046		+	#N/A	O08784	Tcof1	Treacle protein	Tcof1	20.0919	0.921262	+		Tsn	Q62348	Tsn	Translin	Tsn	20.8559	0.221075				P48678	Lmna	Prelamin-A/C	Lmna	26.3174	0.545076		+
P23198	Cbx3	Chromobox protein homolog 3	Cbx3	21.4351	0.439531		+	#N/A	O35309	Nmi	N-myc-interactor	Nmi	19.1325	0.705568	+		Ttc37	F8VPK0	Ttc37	Tetratricopeptide repeat domain 37	Ttc37	19.3391	0.196203				P49300	Clec10a	C-type lectin domain family 10 member A	Clec10a	19.68	1.12008		+
P26039	Tln1	Talin-1	Tln1	24.45	0.201351		+	#N/A	O35344	Kpna3	Importin subunit alpha-4	Kpna3	19.7509	0.55838	+		Tubgcp2	Q921G8	Tubgcp2	Gamma-tubulin complex component 2	Tubgcp2	18.7118	1.80453				P49586	Pcyt1a	Choline-phosphate cytidylyltransferase A	Pcyt1a	19.9077	0.285862		+
P27784	Ccl6	C-C motif chemokine 6	Ccl6	20.8794	0.970041		+	#N/A	O35657	Neu1	Sialidase-1	Neu1	20.1288	0.501984	+		Txlna	Q6PAM1	Txlna	Alpha-taxilin	Txlna	18.9965	0.204914				P50580	Pa2g4	Proliferation-associated protein 2G4	Pa2g4	23.5417	0.428232		+
P28078	H2-DMa	Class II histocompatibility antigen, M alpha chain	H2-DMa	19.8725	0.583195		+	#N/A	O35711	Ppfibp2	Liprin-beta-2	Ppfibp2	17.1198	1.08731	+		Txndc12	Q9CQU0	Txndc12	Thioredoxin domain-containing protein 12	Txndc12	21.1702	0.499027				P51912	Slc1a5	Neutral amino acid transporter B(0)	Slc1a5	18.994	0.940725		+
P28271	Aco1	Cytoplasmic aconitate hydratase	Aco1	22.2715	0.170674		+	#N/A	O35892	Sp100	Nuclear autoantigen Sp-100	Sp100	18.7056	0.90363	+		Tyms	P07607	Tyms	Thymidylate synthase	Tyms	18.7884	0.74838				P57759	Erp29	Endoplasmic reticulum resident protein 29	Erp29	20.1578	0.445168		+
P28352	Apex1	DNA-(apurinic or apyrimidinic site) lyase	Apex1	21.91	0.320628		+	#N/A	O35954	Pitpnm1	Membrane-associated phosphatidylinositol transfer protein 1	Pitpnm1	17.4715	1.04232	+		U2surp	Q6NV83	U2surp	U2 snRNP-associated SURP motif-containing protein	U2surp	19.8171	0.355215				P59759	Mkl2	MKL/myocardin-like protein 2	Mkl2	18.8385	0.710009		+
P28658	Atxn10	Ataxin-10	Atxn10	18.4389	0.512269		+	#N/A	O35955	Psmb10	Proteasome subunit beta type-10	Psmb10	21.0401	1.44576	+		Ubap2l	Q80X50	Ubap2l	Ubiquitin-associated protein 2-like	Ubap2l	19.6992	0.395134				P62071	Rras2	Ras-related protein R-Ras2	Rras2	18.5039	0.139415		+
P29387	Gnb4	Guanine nucleotide-binding protein subunit beta-4	Gnb4	19.4491	0.170718		+	#N/A	O54901	Cd200	OX-2 membrane glycoprotein	Cd200	18.2049	1.08634	+		Ube2r2	Q6ZWZ2	Ube2r2	Ubiquitin-conjugating enzyme E2 R2	Ube2r2	19.5269	0.213956				P62631	Eef1a2	Elongation factor 1-alpha 2	Eef1a2	21.7336	1.8725		+
P35979	Rpl12	60S ribosomal protein L12	Rpl12	20.6072	0.245978		+	#N/A	O55135	Eif6	Eukaryotic translation initiation factor 6	Eif6	22.8324	0.240998	+		Ubxn2b	Q0KL01	Ubxn2b	UBX domain-containing protein 2B	Ubxn2b	20.3591	0.303733				P63254	Crip1	Cysteine-rich protein 1	Crip1	25.8711	0.423378		+
P38060	Hmgcl	Hydroxymethylglutaryl-CoA lyase, mitochondrial	Hmgcl	20.9269	0.812255		+	#N/A	O70622	Rtn2	Reticulon-2	Rtn2	18.5332	0.673227	+		Unc93b1	Q8VCW4	Unc93b1	Protein unc-93 homolog B1	Unc93b1	18.644	1.69931				P63328	Ppp3ca	Serine/threonine-protein phosphatase 2B catalytic subunit alpha isoform	Ppp3ca	20.6593	0.659521		+
P40240	Cd9	CD9 antigen	Cd9	21.8824	0.375723		+	#N/A	O88792	F11r	Junctional adhesion molecule A	F11r	20.8698	0.659987	+		Upf3b	Q3ULL6	Upf3b	UPF3 regulator of nonsense transcripts homolog B (yeast)	Upf3b	17.447	0.93766				P68368	Tuba4a	Tubulin alpha-4A chain	Tuba4a	24.7084	0.646897		+
P45952	Acadm	Medium-chain specific acyl-CoA dehydrogenase, mitochondrial	Acadm	22.9768	0.305989		+	#N/A	O89001	Cpd	Carboxypeptidase D	Cpd	19.2269	0.275931	+		Usp4	P35123	Usp4	Ubiquitin carboxyl-terminal hydrolase 4	Usp4	19.2016	0.38679				P70175	Dlg3	Disks large homolog 3	Dlg3	19.0926	0.639		+
P48678	Lmna	Prelamin-A/C	Lmna	26.4665	0.227558		+	#N/A	P01901	H2-K1	H-2 class I histocompatibility antigen, K-B alpha chain	H2-K1	21.67	0.324971	+		Utp20	Q5XG71	Utp20	Small subunit processome component 20 homolog	Utp20	18.2858	0.810837				P70271	Pdlim4	PDZ and LIM domain protein 4	Pdlim4	21.5801	0.441952		+
P49300	Clec10a	C-type lectin domain family 10 member A	Clec10a	18.5749	0.128666		+	#N/A	P04186	Cfb	Complement factor B	Cfb	19.3393	0.204441	+		Vapa	Q9WV55	Vapa	Vesicle-associated membrane protein-associated protein A	Vapa	22.128	0.146899				P84091	Ap2m1	AP-2 complex subunit mu	Ap2m1	21.1381	0.845464		+
P49446	Ptpre	Receptor-type tyrosine-protein phosphatase epsilon	Ptpre	18.5805	0.272386		+	#N/A	P05480	Src	Neuronal proto-oncogene tyrosine-protein kinase Src	Src	20.9338	0.468943	+		Vcan	Q62059	Vcan	Versican core protein	Vcan	22.0145	0.333522	+			P97302	Bach1	Transcription regulator protein BACH1	Bach1	17.6799	0.657103		+
P49586	Pcyt1a	Choline-phosphate cytidylyltransferase A	Pcyt1a	19.9908	0.31942		+	#N/A	P05622	Pdgfrb	Platelet-derived growth factor receptor beta	Pdgfrb	18.1999	1.00582	+		Vps4b	P46467	Vps4b	Vacuolar protein sorting-associated protein 4B	Vps4b	20.4414	0.138493				P97429	Anxa4	Annexin A4	Anxa4	22.9517	0.619914		+
P50580	Pa2g4	Proliferation-associated protein 2G4	Pa2g4	23.3151	0.437155		+	#N/A	P06801	Me1	NADP-dependent malic enzyme	Me1	20.1658	0.63995	+		Vps72	Q62481	Vps72	Vacuolar protein sorting-associated protein 72 homolog	Vps72	18.2353	0.179013				P97449	Anpep	Aminopeptidase N	Anpep	20.8392	0.575892		+
P51912	Slc1a5	Neutral amino acid transporter B(0)	Slc1a5	19.4613	0.466478		+	#N/A	P08103	Hck	Tyrosine-protein kinase HCK	Hck	20.2453	0.614333	+		Vti1a	O89116	Vti1a	Vesicle transport through interaction with t-SNAREs homolog 1A	Vti1a	18.6679	0.334738	+			P97499	Tep1	Telomerase protein component 1	Tep1	19.9725	1.01319		+
P53808	Pctp	Phosphatidylcholine transfer protein	Pctp	19.3603	0.286189		+	#N/A	P09671	Sod2	Superoxide dismutase [Mn], mitochondrial	Sod2	22.0721	0.300489	+		Vti1b	O88384	Vti1b	Vesicle transport through interaction with t-SNAREs homolog 1B	Vti1b	20.6326	0.354586				P97742	Cpt1a	Carnitine O-palmitoyltransferase 1, liver isoform	Cpt1a	21.169	0.745076		+
P57759	Erp29	Endoplasmic reticulum resident protein 29	Erp29	20.3172	0.362262		+	#N/A	P10852	Slc3a2	4F2 cell-surface antigen heavy chain	Slc3a2	21.4707	0.328304	+		Wars	P32921	Wars	Tryptophan--tRNA ligase, cytoplasmic	Wars	21.9131	0.250111	+			P97855	G3bp1	Ras GTPase-activating protein-binding protein 1	G3bp1	23.1596	0.892522		+
P59759	Mkl2	MKL/myocardin-like protein 2	Mkl2	19.0771	0.626849		+	#N/A	P11404	Fabp3	Fatty acid-binding protein, heart	Fabp3	21.739	0.722795	+		Was	P70315	Was	Wiskott-Aldrich syndrome protein homolog	Was	18.9633	0.663707				Q00560	Il6st	Interleukin-6 receptor subunit beta	Il6st	18.5761	0.418031		+
P62071	Rras2	Ras-related protein R-Ras2	Rras2	18.7776	0.694593		+	#N/A	P11688	Itga5	Integrin alpha-5	Itga5	22.6582	0.683168	+		Wdr82	Q8BFQ4	Wdr82	WD repeat-containing protein 82	Wdr82	19.5216	0.431344				Q02248	Ctnnb1	Catenin beta-1	Ctnnb1	20.8007	1.09207		+
P62631	Eef1a2	Elongation factor 1-alpha 2	Eef1a2	21.3122	1.26646		+	#N/A	P12382	Pfkl	ATP-dependent 6-phosphofructokinase, liver type	Pfkl	20.8548	0.243256	+		Xpo4	Q9ESJ0	Xpo4	Exportin-4	Xpo4	18.6465	0.0844896				Q08857	Cd36	Platelet glycoprotein 4	Cd36	18.9995	0.879082		+
P63254	Crip1	Cysteine-rich protein 1	Crip1	26.5254	0.390643		+	#N/A	P12804	Fgl2	Fibroleukin	Fgl2	18.9124	0.345053	+		Xrn2	Q9DBR1	Xrn2	5'-3' exoribonuclease 2	Xrn2	20.6468	0.175763				Q09200	B4galnt1	Beta-1,4 N-acetylgalactosaminyltransferase 1	B4galnt1	18.2773	0.589698		+
P63328	Ppp3ca	Serine/threonine-protein phosphatase 2B catalytic subunit alpha isoform	Ppp3ca	21.1332	0.202512		+	#N/A	P13597	Icam1	Intercellular adhesion molecule 1	Icam1	18.2507	0.436341	+		Ythdc1	E9Q5K9	Ythdc1	YTH domain-containing protein 1	Ythdc1	18.4096	0.270158				Q3TEA8	Hp1bp3	Heterochromatin protein 1-binding protein 3	Hp1bp3	22.0369	0.407429		+
P68368	Tuba4a	Tubulin alpha-4A chain	Tuba4a	25.045	0.294182		+	#N/A	P17879	Hspa1b	Heat shock 70 kDa protein 1B	Hspa1b	22.9682	0.604965	+		Zc3h15	Q3TIV5	Zc3h15	Zinc finger CCCH domain-containing protein 15	Zc3h15	19.9179	0.245994				Q3TWW8	Srsf6	Serine/arginine-rich splicing factor 6	Srsf6	24.8913	0.312252		+
P70175	Dlg3	Disks large homolog 3	Dlg3	19.8896	0.445937		+	#N/A	P20029	Hspa5	Endoplasmic reticulum chaperone BiP	Hspa5	25.6981	0.383861	+		Zc3hav1	Q3UPF5	Zc3hav1	Zinc finger CCCH-type antiviral protein 1	Zc3hav1	19.9863	0.166154				Q3UV70	Pdp1	[Pyruvate dehydrogenase [acetyl-transferring]]-phosphatase 1, mitochondrial	Pdp1	17.7779	0.695919		+
P70255	Nfic	Nuclear factor 1 C-type	Nfic	19.0747	0.13276		+	#N/A	P21958	Tap1	Antigen peptide transporter 1	Tap1	18.6511	0.516433	+		Znfx1	Q8R151	Znfx1	NFX1-type zinc finger-containing protein 1	Znfx1	18.6626	0.536916	+			Q3V3R4	Itga1	Integrin alpha-1	Itga1	22.6137	0.325779		+
P70271	Pdlim4	PDZ and LIM domain protein 4	Pdlim4	22.0885	0.600945		+	#N/A	P21981	Tgm2	Protein-glutamine gamma-glutamyltransferase 2	Tgm2	23.8736	0.281921	+		Znrf2	Q71FD5	Znrf2	E3 ubiquitin-protein ligase ZNRF2	Znrf2	19.0606	0.335519		+		Q5SW19	Cluh	Clustered mitochondria protein homolog	Cluh	21.2765	0.668008		+
P84091	Ap2m1	AP-2 complex subunit mu	Ap2m1	20.8855	0.64662		+	#N/A	P24638	Acp2	Lysosomal acid phosphatase	Acp2	18.637	0.473325	+		#N/A	A0A286YCV9	Kif13b	Kinesin family member 13B	Kif13b	20.4891	0.269426	+			Q5SYD0	Myo1d	Unconventional myosin-Id	Myo1d	23.2864	0.643088		+
P97302	Bach1	Transcription regulator protein BACH1	Bach1	17.1974	0.758602		+	#N/A	P25085	Il1rn	Interleukin-1 receptor antagonist protein	Il1rn	19.8283	0.398497	+		#N/A	A2ASQ1	Agrn	Agrin	Agrn	20.0361	0.525248	+			Q60598	Cttn	Src substrate cortactin	Cttn	22.7638	0.377598		+
P97429	Anxa4	Annexin A4	Anxa4	23.5247	0.171364		+	#N/A	P25799	Nfkb1	Nuclear factor NF-kappa-B p105 subunit	Nfkb1	19.5719	0.712791	+		#N/A	A7UAK5	Pfkfb3	6-phosphofructo-2-kinase/fructose-2, 6-biphosphatase 3 splice variant 2	Pfkfb3	18.2704	0.930013	+			Q60664	Lrmp	Lymphoid-restricted membrane protein	Lrmp	19.0492	0.22824		+
P97449	Anpep	Aminopeptidase N	Anpep	20.969	0.200455		+	#N/A	P26645	Marcks	Myristoylated alanine-rich C-kinase substrate	Marcks	21.0956	0.813783	+		#N/A	E9Q236	Abcc4	ATP-binding cassette, sub-family C (CFTR/MRP), member 4	Abcc4	18.7122	0.364662	+			Q60790	Rasa3	Ras GTPase-activating protein 3	Rasa3	19.2995	1.00178		+
P97499	Tep1	Telomerase protein component 1	Tep1	19.8364	0.66643		+	#N/A	P27870	Vav1	Proto-oncogene vav	Vav1	18.7393	0.993175	+		#N/A	E9QAM5	Helz2	Helicase with zinc finger domain 2	Helz2	18.4225	0.335015	+			Q60994	Adipoq	Adiponectin	Adipoq	21.5789	1.08309		+
P97742	Cpt1a	Carnitine O-palmitoyltransferase 1, liver isoform	Cpt1a	21.2134	0.422393		+	#N/A	P28076	Psmb9	Proteasome subunit beta type-9	Psmb9	19.1912	0.624655	+		#N/A	F7BJB9	Morc3	MORC family CW-type zinc finger protein 3	Morc3	18.1631	0.344268	+			Q60996	Ppp2r5c	Serine/threonine-protein phosphatase 2A 56 kDa regulatory subunit gamma isoform	Ppp2r5c	17.8955	0.244242		+
P97855	G3bp1	Ras GTPase-activating protein-binding protein 1	G3bp1	22.6376	0.408177		+	#N/A	P28654	Dcn	Decorin	Dcn	21.5238	0.671381	+		#N/A	G3UZ78	Adgb	Androglobin	Adgb	24.7936	1.64926	+			Q61176	Arg1	Arginase-1	Arg1	19.6607	1.63889		+
Q02248	Ctnnb1	Catenin beta-1	Ctnnb1	21.6153	0.53635		+	#N/A	P31324	Prkar2b	cAMP-dependent protein kinase type II-beta regulatory subunit	Prkar2b	19.0882	0.503525	+		#N/A	O08528	Hk2	Hexokinase-2	Hk2	21.7185	0.343791	+			Q61193	Rgl2	Ral guanine nucleotide dissociation stimulator-like 2	Rgl2	16.8719	0.431854		+
Q08857	Cd36	Platelet glycoprotein 4	Cd36	19.6301	0.175757		+	#N/A	P35441	Thbs1	Thrombospondin-1	Thbs1	18.2936	0.159079	+		#N/A	O08691	Arg2	Arginase-2, mitochondrial	Arg2	18.0727	0.859405	+			Q61425	Hadh	Hydroxyacyl-coenzyme A dehydrogenase, mitochondrial	Hadh	22.6538	0.86563		+
Q09200	B4galnt1	Beta-1,4 N-acetylgalactosaminyltransferase 1	B4galnt1	17.3426	0.954052		+	#N/A	P36371	Tap2	Antigen peptide transporter 2	Tap2	20.4875	0.633489	+		#N/A	O08784	Tcof1	Treacle protein	Tcof1	20.1876	0.369401	+			Q61753	Phgdh	D-3-phosphoglycerate dehydrogenase	Phgdh	21.3028	0.545664		+
Q32NY4	Cnnm3	Metal transporter CNNM3	Cnnm3	17.2523	0.305674		+	#N/A	P38647	Hspa9	Stress-70 protein, mitochondrial	Hspa9	24.4998	0.398734	+		#N/A	O35099	Map3k5	Mitogen-activated protein kinase kinase kinase 5	Map3k5	18.079	0.448009	+			Q61823	Pdcd4	Programmed cell death protein 4	Pdcd4	21.7322	1.05925		+
Q3TEA8	Hp1bp3	Heterochromatin protein 1-binding protein 3	Hp1bp3	21.9237	0.323854		+	#N/A	P39429	Traf2	TNF receptor-associated factor 2	Traf2	16.229	0.459408	+		#N/A	O35309	Nmi	N-myc-interactor	Nmi	19.5964	0.281987	+			Q61830	Mrc1	Macrophage mannose receptor 1	Mrc1	21.07	0.530482		+
Q3TWW8	Srsf6	Serine/arginine-rich splicing factor 6	Srsf6	24.7746	0.166949		+	#N/A	P41216	Acsl1	Long-chain-fatty-acid--CoA ligase 1	Acsl1	19.4998	0.400625	+		#N/A	O35344	Kpna3	Importin subunit alpha-4	Kpna3	19.8422	0.381278	+			Q62165	Dag1	Dystroglycan	Dag1	21.7221	0.862424		+
Q3UHC7	Dab2ip	Disabled homolog 2-interacting protein	Dab2ip	19.0646	0.537807		+	#N/A	P42225	Stat1	Signal transducer and activator of transcription 1	Stat1	20.1884	0.69838	+		#N/A	O35424	H2-Ob	Histocompatibility 2, O region beta locus	H2-Ob	18.1247	1.01472	+			Q62179	Sema4b	Semaphorin-4B	Sema4b	19.2059	1.12969		+
Q3UV70	Pdp1	[Pyruvate dehydrogenase [acetyl-transferring]]-phosphatase 1, mitochondrial	Pdp1	19.1744	0.618641		+	#N/A	P43346	Dck	Deoxycytidine kinase	Dck	17.0312	0.513074	+		#N/A	O35448	Ppt2	Lysosomal thioesterase PPT2	Ppt2	16.2244	1.5508	+			Q62351	Tfrc	Transferrin receptor protein 1	Tfrc	20.4376	0.583972		+
Q3V3Q7	Pacs2	Phosphofurin acidic cluster sorting protein 2	Pacs2	16.9305	0.511695		+	#N/A	P43406	Itgav	Integrin alpha-V	Itgav	20.5158	0.133959	+		#N/A	O35657	Neu1	Sialidase-1	Neu1	19.5233	0.695739	+			Q62465	Vat1	Synaptic vesicle membrane protein VAT-1 homolog	Vat1	21.2416	0.79909		+
Q3V3R4	Itga1	Integrin alpha-1	Itga1	22.9008	0.350804		+	#N/A	P47791	Gsr	Glutathione reductase, mitochondrial	Gsr	21.8404	0.415958	+		#N/A	O35711	Ppfibp2	Liprin-beta-2	Ppfibp2	16.363	0.303881	+			Q64727	Vcl	Vinculin	Vcl	24.8228	0.363149		+
Q5M8N0	Cnrip1	CB1 cannabinoid receptor-interacting protein 1	Cnrip1	17.9101	0.401079		+	#N/A	P48025	Syk	Tyrosine-protein kinase SYK	Syk	18.3713	0.761459	+		#N/A	O35892	Sp100	Nuclear autoantigen Sp-100	Sp100	20.2659	0.557529	+			Q6DFW4	Nop58	Nucleolar protein 58	Nop58	19.2652	1.03577		+
Q5SW19	Cluh	Clustered mitochondria protein homolog	Cluh	21.0425	0.234299		+	#N/A	P48722	Hspa4l	Heat shock 70 kDa protein 4L	Hspa4l	20.5891	0.479579	+		#N/A	O35954	Pitpnm1	Membrane-associated phosphatidylinositol transfer protein 1	Pitpnm1	18.0703	0.420134	+			Q6P5H2	Nes	Nestin	Nes	19.1374	1.30645		+
Q5SWD9	Tsr1	Pre-rRNA-processing protein TSR1 homolog	Tsr1	18.0425	0.713256		+	#N/A	P49710	Hcls1	Hematopoietic lineage cell-specific protein	Hcls1	19.4066	0.464002	+		#N/A	O35955	Psmb10	Proteasome subunit beta type-10	Psmb10	21.6578	0.790701	+			Q6PDY2	Ado	2-aminoethanethiol dioxygenase	Ado	19.6329	0.524672		+
Q5SYD0	Myo1d	Unconventional myosin-Id	Myo1d	23.2877	0.176977		+	#N/A	P49817	Cav1	Caveolin-1	Cav1	22.569	0.924962	+		#N/A	O54901	Cd200	OX-2 membrane glycoprotein	Cd200	18.8348	0.601198	+			Q6PGB6	Naa50	N-alpha-acetyltransferase 50	Naa50	19.312	0.997799		+
Q60598	Cttn	Src substrate cortactin	Cttn	22.8039	0.129548		+	#N/A	P50396	Gdi1	Rab GDP dissociation inhibitor alpha	Gdi1	20.6954	0.51121	+		#N/A	O55135	Eif6	Eukaryotic translation initiation factor 6	Eif6	22.9028	0.430598	+			Q71FD5	Znrf2	E3 ubiquitin-protein ligase ZNRF2	Znrf2	19.0137	0.540466		+
Q60664	Lrmp	Lymphoid-restricted membrane protein	Lrmp	19.2564	0.353577		+	#N/A	P50637	Tspo	Translocator protein	Tspo	18.9943	0.513072	+		#N/A	O70622	Rtn2	Reticulon-2	Rtn2	18.9096	1.20829	+			Q7SIG6	Asap2	Arf-GAP with SH3 domain, ANK repeat and PH domain-containing protein 2	Asap2	27.6289	1.16983		+
Q60790	Rasa3	Ras GTPase-activating protein 3	Rasa3	18.1461	0.119266		+	#N/A	P53690	Mmp14	Matrix metalloproteinase-14	Mmp14	17.8173	0.220487	+		#N/A	O88792	F11r	Junctional adhesion molecule A	F11r	20.9541	0.37164	+			Q7TN29	Smap2	Stromal membrane-associated protein 2	Smap2	19.9807	0.827905		+
Q60793	Klf4	Krueppel-like factor 4	Klf4	18.0246	0.0197174		+	#N/A	P56375	Acyp2	Acylphosphatase-2	Acyp2	19.1542	0.676897	+		#N/A	O89001	Cpd	Carboxypeptidase D	Cpd	18.8869	0.4963	+			Q7TSJ2	Map6	Microtubule-associated protein 6	Map6	19.0081	0.694157		+
Q60994	Adipoq	Adiponectin	Adipoq	21.663	0.777296		+	#N/A	P57016	Lad1	Ladinin-1	Lad1	22.225	0.363675	+		#N/A	P01901	H2-K1	H-2 class I histocompatibility antigen, K-B alpha chain	H2-K1	22.8558	0.548677	+			Q80UW8	Polr2e	DNA-directed RNA polymerases I, II, and III subunit RPABC1	Polr2e	20.1181	0.793894		+
Q60996	Ppp2r5c	Serine/threonine-protein phosphatase 2A 56 kDa regulatory subunit gamma isoform	Ppp2r5c	18.2039	0.672512		+	#N/A	P62915	Gtf2b	Transcription initiation factor IIB	Gtf2b	18.4101	0.878333	+		#N/A	P04186	Cfb	Complement factor B	Cfb	20.434	0.520666	+			Q810D6	Grwd1	Glutamate-rich WD repeat-containing protein 1	Grwd1	18.4978	0.159688		+
Q61176	Arg1	Arginase-1	Arg1	19.6557	1.34426		+	#N/A	P70122	Sbds	Ribosome maturation protein SBDS	Sbds	20.4622	0.523022	+		#N/A	P04918	Saa3	Serum amyloid A-3 protein	Saa3	18.7201	1.39348	+			Q8BH95	Echs1	Enoyl-CoA hydratase, mitochondrial	Echs1	22.3914	1.27921		+
Q61193	Rgl2	Ral guanine nucleotide dissociation stimulator-like 2	Rgl2	17.0077	0.300028		+	#N/A	P70380	Il18	Interleukin-18	Il18	17.388	0.711659	+		#N/A	P05480	Src	Neuronal proto-oncogene tyrosine-protein kinase Src	Src	21.0096	0.167084	+			Q8BHJ5	Tbl1xr1	F-box-like/WD repeat-containing protein TBL1XR1	Tbl1xr1	19.0803	1.00107		+
Q61263	Soat1	Sterol O-acyltransferase 1	Soat1	17.2308	1.02232		+	#N/A	P70460	Vasp	Vasodilator-stimulated phosphoprotein	Vasp	21.1435	0.311233	+		#N/A	P05622	Pdgfrb	Platelet-derived growth factor receptor beta	Pdgfrb	19.1093	0.893575	+			Q8BKS9	Pum3	Pumilio homolog 3	Pum3	19.1698	0.404303		+
Q61425	Hadh	Hydroxyacyl-coenzyme A dehydrogenase, mitochondrial	Hadh	24.1343	0.174378		+	#N/A	P82198	Tgfbi	Transforming growth factor-beta-induced protein ig-h3	Tgfbi	23.4273	0.390457	+		#N/A	P06801	Me1	NADP-dependent malic enzyme	Me1	21.2571	0.56637	+			Q8BMK4	Ckap4	Cytoskeleton-associated protein 4	Ckap4	21.9862	0.549141		+
Q61753	Phgdh	D-3-phosphoglycerate dehydrogenase	Phgdh	20.8643	0.235838		+	#N/A	P97360	Etv6	Transcription factor ETV6	Etv6	19.3304	0.570436	+		#N/A	P08103	Hck	Tyrosine-protein kinase HCK	Hck	20.7438	0.238502	+			Q8BVI4	Qdpr	Dihydropteridine reductase	Qdpr	21.5503	0.337016		+
Q61823	Pdcd4	Programmed cell death protein 4	Pdcd4	21.7359	0.301064		+	#N/A	P97364	Sephs2	Selenide, water dikinase 2	Sephs2	17.6857	1.13034	+		#N/A	P09450	Junb	Transcription factor jun-B	Junb	18.452	0.69449	+			Q8C0D4	Arhgap12	Rho GTPase-activating protein 12	Arhgap12	18.2721	0.617646		+
Q61830	Mrc1	Macrophage mannose receptor 1	Mrc1	20.56	0.228594		+	#N/A	P97372	Psme2	Proteasome activator complex subunit 2	Psme2	21.4172	0.529987	+		#N/A	P09671	Sod2	Superoxide dismutase [Mn], mitochondrial	Sod2	21.5524	0.406422	+			Q8C3J5	Dock2	Dedicator of cytokinesis protein 2	Dock2	18.204	1.17792		+
Q62165	Dag1	Dystroglycan	Dag1	22.1913	0.341336		+	#N/A	P97864	Casp7	Caspase-7	Casp7	21.0674	0.401792	+		#N/A	P10810	Cd14	Monocyte differentiation antigen CD14	Cd14	17.4849	0.81203	+			Q8C6B0	Mettl7a1	MCG20149, isoform CRA_a	Mettl7a1	21.305	0.420444		+
Q62172	Ralbp1	RalA-binding protein 1	Ralbp1	18.9883	1.24093		+	#N/A	P98078	Dab2	Disabled homolog 2	Dab2	19.5294	0.42273	+		#N/A	P10852	Slc3a2	4F2 cell-surface antigen heavy chain	Slc3a2	22.071	0.230489	+			Q8C6G8	Wdr26	WD repeat-containing protein 26	Wdr26	18.8358	0.27429		+
Q62179	Sema4b	Semaphorin-4B	Sema4b	19.0084	0.453396		+	#N/A	P99029	Prdx5	Peroxiredoxin-5, mitochondrial	Prdx5	24.161	0.370406	+		#N/A	P11404	Fabp3	Fatty acid-binding protein, heart	Fabp3	21.9832	0.729881	+			Q8CHP8	Pgp	Glycerol-3-phosphate phosphatase	Pgp	21.8824	0.504697		+
Q62351	Tfrc	Transferrin receptor protein 1	Tfrc	19.2482	0.244873		+	#N/A	Q03963	Eif2ak2	Interferon-induced, double-stranded RNA-activated protein kinase	Eif2ak2	20.8417	0.822204	+		#N/A	P11672	Lcn2	Neutrophil gelatinase-associated lipocalin	Lcn2	21.3166	0.61164	+			Q8CHY6	Gatad2a	Transcriptional repressor p66 alpha	Gatad2a	18.9933	0.596678		+
Q62465	Vat1	Synaptic vesicle membrane protein VAT-1 homolog	Vat1	21.3785	0.494496		+	#N/A	Q04207	Rela	Transcription factor p65	Rela	19.4434	0.275383	+		#N/A	P11688	Itga5	Integrin alpha-5	Itga5	23.1815	0.29472	+			Q8CIZ8	Vwf	von Willebrand factor	Vwf	19.4166	0.922235		+
Q63943	Mef2d	Myocyte-specific enhancer factor 2D	Mef2d	16.3377	0.366359		+	#N/A	Q04750	Top1	DNA topoisomerase 1	Top1	21.0652	0.346789	+		#N/A	P12382	Pfkl	ATP-dependent 6-phosphofructokinase, liver type	Pfkl	20.4918	0.278827	+			Q8K0J2	B3gnt7	UDP-GlcNAc:betaGal beta-1,3-N-acetylglucosaminyltransferase 7	B3gnt7	20.0765	0.968776		+
Q64685	St6gal1	Beta-galactoside alpha-2,6-sialyltransferase 1	St6gal1	17.722	0.877777		+	#N/A	Q05144	Rac2	Ras-related C3 botulinum toxin substrate 2	Rac2	24.7268	0.561646	+		#N/A	P12804	Fgl2	Fibroleukin	Fgl2	19.5329	0.263163	+			Q8K0Q5	Arhgap18	Rho GTPase-activating protein 18	Arhgap18	18.4792	0.879334		+
Q64727	Vcl	Vinculin	Vcl	25.2075	0.327432		+	#N/A	Q09199	B4galnt2	Beta-1,4 N-acetylgalactosaminyltransferase 2	B4galnt2	21.5289	0.675006	+		#N/A	P13597	Icam1	Intercellular adhesion molecule 1	Icam1	20.612	0.484705	+			Q8K157	Galm	Aldose 1-epimerase	Galm	18.4813	1.25124		+
Q6DFW4	Nop58	Nucleolar protein 58	Nop58	19.4219	0.664295		+	#N/A	Q3THS6	Mat2a	S-adenosylmethionine synthase isoform type-2	Mat2a	21.5966	0.127086	+		#N/A	P14901	Hmox1	Heme oxygenase 1	Hmox1	20.1719	1.00257	+			Q8K353	Cystm1	Cysteine-rich and transmembrane domain-containing protein 1	Cystm1	18.8023	0.917193		+
Q6NT99	Dusp23	Dual specificity protein phosphatase 23	Dusp23	19.1318	0.869047		+	#N/A	Q3TJD7	Pdlim7	PDZ and LIM domain protein 7	Pdlim7	22.989	1.07611	+		#N/A	P17879	Hspa1b	Heat shock 70 kDa protein 1B	Hspa1b	23.4888	0.351267	+			Q8K354	Cbr3	Carbonyl reductase [NADPH] 3	Cbr3	21.3633	1.00114		+
Q6P5G3	Mbtd1	MBT domain-containing protein 1	Mbtd1	17.8327	0.903433		+	#N/A	Q3TKY6	Cwc27	Spliceosome-associated protein CWC27 homolog	Cwc27	18.2491	0.385903	+		#N/A	P18155	Mthfd2	Bifunctional methylenetetrahydrofolate dehydrogenase/cyclohydrolase, mitochondrial	Mthfd2	15.3563	0.596393	+			Q8K3G9	Appl2	DCC-interacting protein 13-beta	Appl2	19.2953	1.0382		+
Q6P5H2	Nes	Nestin	Nes	18.9653	0.655977		+	#N/A	Q3TN34	Micall2	MICAL-like protein 2	Micall2	19.4164	0.921426	+		#N/A	P19123	Tnnc1	Troponin C, slow skeletal and cardiac muscles	Tnnc1	20.0836	1.83098	+			Q8R1F1	Fam129b	Niban-like protein 1	Fam129b	21.097	0.212123		+
Q6P9S7	Galnt10	Polypeptide N-acetylgalactosaminyltransferase 10	Galnt10	18.8936	0.0574072		+	#N/A	Q3TVI8	Pbxip1	Pre-B-cell leukemia transcription factor-interacting protein 1	Pbxip1	20.8993	0.621072	+		#N/A	P20029	Hspa5	Endoplasmic reticulum chaperone BiP	Hspa5	25.8048	0.385503	+			Q8R361	Rab11fip5	Rab11 family-interacting protein 5	Rab11fip5	19.4797	1.04741		+
Q6PDY2	Ado	2-aminoethanethiol dioxygenase	Ado	20.2063	0.589569		+	#N/A	Q3U5Q7	Cmpk2	UMP-CMP kinase 2, mitochondrial	Cmpk2	18.35	0.607284	+		#N/A	P21958	Tap1	Antigen peptide transporter 1	Tap1	20.8152	0.335274	+			Q8R3T5	Stxbp6	Syntaxin-binding protein 6	Stxbp6	19.6234	0.395521		+
Q6PGB6	Naa50	N-alpha-acetyltransferase 50	Naa50	20.2203	0.175729		+	#N/A	Q3UW53	Fam129a	Protein Niban	Fam129a	22.5847	0.153312	+		#N/A	P21981	Tgm2	Protein-glutamine gamma-glutamyltransferase 2	Tgm2	24.4006	0.199992	+			Q8VCG1	Dut	Deoxyuridine triphosphatase	Dut	21.0541	0.467819		+
Q71FD5	Znrf2	E3 ubiquitin-protein ligase ZNRF2	Znrf2	18.8218	0.644225		+	#N/A	Q3UZA1	Rcsd1	CapZ-interacting protein	Rcsd1	16.5105	1.45846	+		#N/A	P24063	Itgal	Integrin alpha-L	Itgal	18.8132	0.522313	+			Q8VCI0	Plbd1	Phospholipase B-like 1	Plbd1	19.8876	0.384163		+
Q7SIG6	Asap2	Arf-GAP with SH3 domain, ANK repeat and PH domain-containing protein 2	Asap2	27.6268	0.947299		+	#N/A	Q5EBG6	Hspb6	Heat shock protein beta-6	Hspb6	22.3538	0.357379	+		#N/A	P24638	Acp2	Lysosomal acid phosphatase	Acp2	18.4136	0.124123	+			Q8VDN2	Atp1a1	Sodium/potassium-transporting ATPase subunit alpha-1	Atp1a1	25.1488	0.544648		+
Q7TN05	Ap1s3	AP-1 complex subunit sigma-3	Ap1s3	18.6597	0.144173		+	#N/A	Q5SUA5	Myo1g	Unconventional myosin-Ig	Myo1g	18.2005	0.40794	+		#N/A	P25799	Nfkb1	Nuclear factor NF-kappa-B p105 subunit	Nfkb1	19.8726	0.147395	+			Q8VDP3	Mical1	[F-actin]-monooxygenase MICAL1	Mical1	20.9641	0.856374		+
Q7TN29	Smap2	Stromal membrane-associated protein 2	Smap2	18.6567	0.736569		+	#N/A	Q60710	Samhd1	Deoxynucleoside triphosphate triphosphohydrolase SAMHD1	Samhd1	21.6784	0.216455	+		#N/A	P26645	Marcks	Myristoylated alanine-rich C-kinase substrate	Marcks	20.3431	1.27321	+			Q8VEG6	Cnot6l	CCR4-NOT transcription complex subunit 6-like	Cnot6l	18.014	0.863637		+
Q7TSJ2	Map6	Microtubule-associated protein 6	Map6	19.0926	0.392081		+	#N/A	Q60715	P4ha1	Prolyl 4-hydroxylase subunit alpha-1	P4ha1	17.6134	0.890801	+		#N/A	P27870	Vav1	Proto-oncogene vav	Vav1	20.2664	0.499126	+			Q91VH2	Snx9	Sorting nexin-9	Snx9	20.9641	0.674543		+
Q80UK0	Sestd1	SEC14 domain and spectrin repeat-containing protein 1	Sestd1	18.7253	0.2233		+	#N/A	Q60974	Ncor1	Nuclear receptor corepressor 1	Ncor1	18.394	0.674266	+		#N/A	P28033	Cebpb	CCAAT/enhancer-binding protein beta	Cebpb	17.7206	1.08585	+			Q91VI7	Rnh1	Ribonuclease inhibitor	Rnh1	23.9527	0.537652		+
Q80UP3	Dgkz	Diacylglycerol kinase zeta	Dgkz	18.388	0.518588		+	#N/A	Q61024	Asns	Asparagine synthetase [glutamine-hydrolyzing]	Asns	19.5072	0.561079	+		#N/A	P28076	Psmb9	Proteasome subunit beta type-9	Psmb9	21.1346	0.340444	+			Q91VK1	Bzw2	Basic leucine zipper and W2 domain-containing protein 2	Bzw2	21.1978	0.517944		+
Q80UW8	Polr2e	DNA-directed RNA polymerases I, II, and III subunit RPABC1	Polr2e	20.2613	0.237247		+	#N/A	Q61147	Cp	Ceruloplasmin	Cp	20.9754	0.488587	+		#N/A	P28301	Lox	Protein-lysine 6-oxidase	Lox	18.3077	1.02557	+			Q91WC9	Daglb	Sn1-specific diacylglycerol lipase beta	Daglb	17.6625	0.94199		+
Q80YQ8	Rmnd5a	E3 ubiquitin-protein ligase RMND5A	Rmnd5a	18.2646	0.685708		+	#N/A	Q61235	Sntb2	Beta-2-syntrophin	Sntb2	20.7259	0.410144	+		#N/A	P28654	Dcn	Decorin	Dcn	21.4702	0.617225	+			Q91WG4	Elp2	Elongator complex protein 2	Elp2	18.4597	0.442577		+
Q810D6	Grwd1	Glutamate-rich WD repeat-containing protein 1	Grwd1	17.9041	0.221711		+	#N/A	Q61271	Acvr1b	Activin receptor type-1B	Acvr1b	17.4783	0.642797	+		#N/A	P28667	Marcksl1	MARCKS-related protein	Marcksl1	17.6733	1.25953	+			Q91XC8	Dap	Death-associated protein 1	Dap	21.8249	1.4049		+
Q8BGR6	Arl15	ADP-ribosylation factor-like protein 15	Arl15	16.3355	0.136655		+	#N/A	Q61510	Trim25	E3 ubiquitin/ISG15 ligase TRIM25	Trim25	19.4213	0.339133	+		#N/A	P29477	Nos2	Nitric oxide synthase, inducible	Nos2	18.3887	0.558276	+			Q91Y74	St3gal4	CMP-N-acetylneuraminate-beta-galactosamide-alpha-2,3-sialyltransferase 4	St3gal4	18.1016	0.635284		+
Q8BH95	Echs1	Enoyl-CoA hydratase, mitochondrial	Echs1	22.812	0.377402		+	#N/A	Q61553	Fscn1	Fascin	Fscn1	20.0529	0.940739	+		#N/A	P29533	Vcam1	Vascular cell adhesion protein 1	Vcam1	18.4257	1.69913	+			Q91YU8	Ppan	Suppressor of SWI4 1 homolog	Ppan	18.1514	0.660807		+
Q8BHD8	Pcmtd2	Protein-L-isoaspartate O-methyltransferase domain-containing protein 2	Pcmtd2	17.7052	0.740024		+	#N/A	Q63850	Nup62	Nuclear pore glycoprotein p62	Nup62	18.4172	0.811651	+		#N/A	P31266	Rbpj	Recombining binding protein suppressor of hairless	Rbpj	16.7639	0.167816	+			Q921E2	Rab31	Ras-related protein Rab-31	Rab31	16.4562	0.41343		+
Q8BHJ5	Tbl1xr1	F-box-like/WD repeat-containing protein TBL1XR1	Tbl1xr1	18.2878	0.477117		+	#N/A	Q64321	Zbtb7b	Zinc finger and BTB domain-containing protein 7B	Zbtb7b	18.6293	0.212898	+		#N/A	P31324	Prkar2b	cAMP-dependent protein kinase type II-beta regulatory subunit	Prkar2b	19.2571	0.708033	+			Q922J3	Clip1	CAP-Gly domain-containing linker protein 1	Clip1	18.9932	0.50158		+
Q8BKS9	Pum3	Pumilio homolog 3	Pum3	17.9761	0.276656		+	#N/A	Q64471	Gstt1	Glutathione S-transferase theta-1	Gstt1	22.243	0.373553	+		#N/A	P32037	Slc2a3	Solute carrier family 2, facilitated glucose transporter member 3	Slc2a3	18.1732	0.930252	+			Q99J09	Wdr77	Methylosome protein 50	Wdr77	20.0728	0.951116		+
Q8BMK4	Ckap4	Cytoskeleton-associated protein 4	Ckap4	21.6854	0.193733		+	#N/A	Q6EDY6	Carmil1	F-actin-uncapping protein LRRC16A	Carmil1	18.8161	0.449216	+		#N/A	P35441	Thbs1	Thrombospondin-1	Thbs1	20.8105	1.06332	+			Q99JW2	Acy1	Aminoacylase-1	Acy1	20.1034	0.726008		+
Q8BNU0	Armc6	Armadillo repeat-containing protein 6	Armc6	17.5976	0.31975		+	#N/A	Q6PDH0	Phldb1	Pleckstrin homology-like domain family B member 1	Phldb1	18.7853	0.152756	+		#N/A	P35831	Ptpn12	Tyrosine-protein phosphatase non-receptor type 12	Ptpn12	19.9298	0.84064	+			Q99JY0	Hadhb	Trifunctional enzyme subunit beta, mitochondrial	Hadhb	23.754	0.306128		+
Q8BVI4	Qdpr	Dihydropteridine reductase	Qdpr	21.4296	1.90393		+	#N/A	Q6Q899	Ddx58	Probable ATP-dependent RNA helicase DDX58	Ddx58	18.8704	0.887632	+		#N/A	P36371	Tap2	Antigen peptide transporter 2	Tap2	21.7002	0.491626	+			Q99K85	Psat1	Phosphoserine aminotransferase	Psat1	20.9817	0.497733		+
Q8C0D4	Arhgap12	Rho GTPase-activating protein 12	Arhgap12	18.1765	0.688419		+	#N/A	Q6ZQ58	Larp1	La-related protein 1	Larp1	20.596	0.35118	+		#N/A	P38647	Hspa9	Stress-70 protein, mitochondrial	Hspa9	24.4237	0.249864	+			Q99LR1	Abhd12	Monoacylglycerol lipase ABHD12	Abhd12	19.6779	0.232533		+
Q8C6B0	Mettl7a1	MCG20149, isoform CRA_a	Mettl7a1	22.0423	0.297681		+	#N/A	Q6ZQL4	Wdr43	WD repeat-containing protein 43	Wdr43	18.4885	0.35189	+		#N/A	P39429	Traf2	TNF receptor-associated factor 2	Traf2	17.0631	0.518024	+			Q99LS3	Psph	Phosphoserine phosphatase	Psph	19.0835	0.771844		+
Q8C6G8	Wdr26	WD repeat-containing protein 26	Wdr26	18.6308	0.384233		+	#N/A	Q78YZ6	Scoc	Short coiled-coil protein	Scoc	17.1748	1.15976	+		#N/A	P40237	Cd82	CD82 antigen	Cd82	15.6082	0.925416	+			Q99N69	Lpxn	Leupaxin	Lpxn	18.9952	0.681719		+
Q8C7K6	Pcyox1l	Prenylcysteine oxidase-like	Pcyox1l	17.1016	0.572744		+	#N/A	Q7TSF4	Lrrc75a	Leucine-rich repeat-containing protein 75A	Lrrc75a	17.108	1.72077	+		#N/A	P41216	Acsl1	Long-chain-fatty-acid--CoA ligase 1	Acsl1	19.6172	0.508093	+			Q9CQ73	Pkp2	Plakophilin 2	Pkp2	20.2456	0.899609		+
Q8CBH5	Mfsd6	Major facilitator superfamily domain-containing protein 6	Mfsd6	19.6134	0.382186		+	#N/A	Q80TM9	Nisch	Nischarin	Nisch	18.925	0.335588	+		#N/A	P42225	Stat1	Signal transducer and activator of transcription 1	Stat1	22.1462	0.610315	+			Q9CQF3	Nudt21	Cleavage and polyadenylation specificity factor subunit 5	Nudt21	19.8838	0.599948		+
Q8CHP8	Pgp	Glycerol-3-phosphate phosphatase	Pgp	22.2347	0.238113		+	#N/A	Q80UW5	Cdc42bpg	Serine/threonine-protein kinase MRCK gamma	Cdc42bpg	18.3731	0.719798	+		#N/A	P42230	Stat5a	Signal transducer and activator of transcription 5A	Stat5a	18.7416	0.492082	+			Q9CQF9	Pcyox1	Prenylcysteine oxidase	Pcyox1	19.3363	1.13892		+
Q8CHY6	Gatad2a	Transcriptional repressor p66 alpha	Gatad2a	19.3048	0.86363		+	#N/A	Q80WJ7	Mtdh	Protein LYRIC	Mtdh	21.6318	0.436073	+		#N/A	P43346	Dck	Deoxycytidine kinase	Dck	17.2739	0.655082	+			Q9CR57	Rpl14	60S ribosomal protein L14	Rpl14	21.3928	1.13129		+
Q8CIZ8	Vwf	von Willebrand factor	Vwf	18.918	0.323538		+	#N/A	Q80WT5	Aftph	Aftiphilin	Aftph	19.2472	0.165498	+		#N/A	P43406	Itgav	Integrin alpha-V	Itgav	20.5653	0.206043	+			Q9CWJ9	Atic	Bifunctional purine biosynthesis protein PURH	Atic	22.0802	0.502715		+
Q8K0J2	B3gnt7	UDP-GlcNAc:betaGal beta-1,3-N-acetylglucosaminyltransferase 7	B3gnt7	19.3561	0.50605		+	#N/A	Q80X90	Flnb	Filamin-B	Flnb	23.1409	0.206666	+		#N/A	P47791	Gsr	Glutathione reductase, mitochondrial	Gsr	21.4418	0.350745	+			Q9CY66	Gar1	H/ACA ribonucleoprotein complex subunit 1	Gar1	21.3839	0.752172		+
Q8K0Q5	Arhgap18	Rho GTPase-activating protein 18	Arhgap18	18.0576	0.177693		+	#N/A	Q8BG95	Ppp1r12b	Protein phosphatase 1 regulatory subunit 12B	Ppp1r12b	22.0821	0.947881	+		#N/A	P48025	Syk	Tyrosine-protein kinase SYK	Syk	19.0139	0.478472	+			Q9D0K2	Oxct1	Succinyl-CoA:3-ketoacid coenzyme A transferase 1, mitochondrial	Oxct1	21.2819	0.704893		+
Q8K157	Galm	Aldose 1-epimerase	Galm	20.1892	0.72981		+	#N/A	Q8BGQ7	Aars	Alanine--tRNA ligase, cytoplasmic	Aars	20.9123	0.299957	+		#N/A	P48722	Hspa4l	Heat shock 70 kDa protein 4L	Hspa4l	20.3795	0.507303	+			Q9D1R2	Kti12	Protein KTI12 homolog	Kti12	20.0225	0.180861		+
Q8K354	Cbr3	Carbonyl reductase [NADPH] 3	Cbr3	22.4475	0.558989		+	#N/A	Q8BH59	Slc25a12	Calcium-binding mitochondrial carrier protein Aralar1	Slc25a12	22.2922	1.13172	+		#N/A	P49710	Hcls1	Hematopoietic lineage cell-specific protein	Hcls1	21.4231	0.473391	+			Q9D1T5	Prr15	Proline-rich protein 15	Prr15	18.5464	1.26772		+
Q8K3A0	Hscb	Iron-sulfur cluster co-chaperone protein HscB, mitochondrial	Hscb	17.2832	1.0205		+	#N/A	Q8BTY2	Slc4a7	Sodium bicarbonate cotransporter 3	Slc4a7	18.5488	0.768746	+		#N/A	P49817	Cav1	Caveolin-1	Cav1	22.4868	0.529421	+			Q9D379	Ephx1	Epoxide hydrolase 1	Ephx1	21.4297	0.903199		+
Q8K3G9	Appl2	DCC-interacting protein 13-beta	Appl2	19.8092	0.625472		+	#N/A	Q8BYI6	Lpcat2	Lysophosphatidylcholine acyltransferase 2	Lpcat2	17.9916	0.487984	+		#N/A	P50396	Gdi1	Rab GDP dissociation inhibitor alpha	Gdi1	20.65	0.447286	+			Q9D7G0	Prps1	Ribose-phosphate pyrophosphokinase 1	Prps1	20.4259	0.616653		+
Q8R1F1	Fam129b	Niban-like protein 1	Fam129b	21.0044	0.471556		+	#N/A	Q8BYY4	Ttc39b	Tetratricopeptide repeat protein 39B	Ttc39b	17.6051	0.648504	+		#N/A	P50637	Tspo	Translocator protein	Tspo	19.1777	0.761584	+			Q9D7X3	Dusp3	Dual specificity protein phosphatase 3	Dusp3	19.6547	0.62682		+
Q8R361	Rab11fip5	Rab11 family-interacting protein 5	Rab11fip5	18.8207	0.896089		+	#N/A	Q8BZ20	Parp12	Poly [ADP-ribose] polymerase 12	Parp12	19.0221	0.764445	+		#N/A	P51437	Camp	Cathelicidin antimicrobial peptide	Camp	18.687	1.19931	+			Q9D8U8	Snx5	Sorting nexin-5	Snx5	20.3334	0.344488		+
Q8R3T5	Stxbp6	Syntaxin-binding protein 6	Stxbp6	19.7348	0.571757		+	#N/A	Q8C025	Chpt1	Cholinephosphotransferase 1	Chpt1	19.3815	1.32791	+		#N/A	P53690	Mmp14	Matrix metalloproteinase-14	Mmp14	19.1213	0.39474	+			Q9DBS5	Klc4	Kinesin light chain 4	Klc4	20.5098	0.936587		+
Q8R570	Snap47	Synaptosomal-associated protein 47	Snap47	17.9065	0.0665046		+	#N/A	Q8C4Q6	Aida	Axin interactor, dorsalization-associated protein	Aida	18.8947	0.246496	+		#N/A	P55041	Gem	GTP-binding protein GEM	Gem	18.2939	0.973043	+			Q9DBT5	Ampd2	AMP deaminase 2	Ampd2	19.4999	0.975256		+
Q8VCG1	Dut	Deoxyuridine triphosphatase	Dut	20.8023	0.458386		+	#N/A	Q8CBY8	Dctn4	Dynactin subunit 4	Dctn4	18.6945	0.612311	+		#N/A	P56375	Acyp2	Acylphosphatase-2	Acyp2	18.9064	0.599781	+			Q9DC11	Plxdc2	Plexin domain-containing protein 2	Plxdc2	19.2889	1.13886		+
Q8VCI0	Plbd1	Phospholipase B-like 1	Plbd1	19.4662	1.06533		+	#N/A	Q8K012	Fnbp1l	Formin-binding protein 1-like	Fnbp1l	18.0729	1.25792	+		#N/A	P57016	Lad1	Ladinin-1	Lad1	21.879	0.427178	+			Q9DCL9	Paics	Multifunctional protein ADE2	Paics	21.1351	0.50626		+
Q8VD57	Sft2d2	Vesicle transport protein SFT2B	Sft2d2	17.2964	0.504361		+	#N/A	Q8K3H0	Appl1	DCC-interacting protein 13-alpha	Appl1	19.385	0.697594	+		#N/A	P58069	Rasa2	Ras GTPase-activating protein 2	Rasa2	17.8566	0.736821	+			Q9DCZ1	Gmpr	GMP reductase 1	Gmpr	19.7065	0.591728		+
Q8VD75	Hip1	Huntingtin-interacting protein 1	Hip1	18.4665	0.156707		+	#N/A	Q8R1B4	Eif3c	Eukaryotic translation initiation factor 3 subunit C	Eif3c	21.3388	0.519885	+		#N/A	P62915	Gtf2b	Transcription initiation factor IIB	Gtf2b	18.5976	0.223198	+			Q9ES52	Inpp5d	Phosphatidylinositol 3,4,5-trisphosphate 5-phosphatase 1	Inpp5d	18.2766	1.3517		+
Q8VDN2	Atp1a1	Sodium/potassium-transporting ATPase subunit alpha-1	Atp1a1	25.6926	0.320216		+	#N/A	Q8R2Q8	Bst2	Bone marrow stromal antigen 2	Bst2	18.7574	0.798078	+		#N/A	P63300	Selenow	Selenoprotein W	Selenow	16.4693	0.496976	+			Q9ESX5	Dkc1	H/ACA ribonucleoprotein complex subunit DKC1	Dkc1	21.3349	0.29696		+
Q8VDP3	Mical1	[F-actin]-monooxygenase MICAL1	Mical1	20.9184	0.273838		+	#N/A	Q8R3U1	Pla2g16	HRAS-like suppressor 3	Pla2g16	19.5368	0.204374	+		#N/A	P70122	Sbds	Ribosome maturation protein SBDS	Sbds	20.6319	0.44711	+			Q9ESZ8	Gtf2i	General transcription factor II-I	Gtf2i	19.6464	1.28983		+
Q8VEG6	Cnot6l	CCR4-NOT transcription complex subunit 6-like	Cnot6l	18.1178	0.412988		+	#N/A	Q8R5F7	Ifih1	Interferon-induced helicase C domain-containing protein 1	Ifih1	18.7182	0.882008	+		#N/A	P70380	Il18	Interleukin-18	Il18	17.2581	0.935618	+			Q9ET30	Tm9sf3	Transmembrane 9 superfamily member 3	Tm9sf3	19.4757	0.502768		+
Q91VH2	Snx9	Sorting nexin-9	Snx9	20.7882	0.208465		+	#N/A	Q8VDC1	Fyco1	FYVE and coiled-coil domain-containing protein 1	Fyco1	18.4485	1.15853	+		#N/A	P70460	Vasp	Vasodilator-stimulated phosphoprotein	Vasp	20.9901	0.13285	+			Q9JJG0	Tacc2	Transforming acidic coiled-coil-containing protein 2	Tacc2	18.9918	0.811551		+
Q91VI7	Rnh1	Ribonuclease inhibitor	Rnh1	23.9501	0.330655		+	#N/A	Q8VI94	Oasl1	2'-5'-oligoadenylate synthase-like protein 1	Oasl1	18.3538	0.521882	+		#N/A	P82198	Tgfbi	Transforming growth factor-beta-induced protein ig-h3	Tgfbi	24.1703	0.403293	+			Q9JL62	Gltp	Glycolipid transfer protein	Gltp	19.3522	0.202146		+
Q91VK1	Bzw2	Basic leucine zipper and W2 domain-containing protein 2	Bzw2	21.085	0.435434		+	#N/A	Q91VC9	Ghitm	Growth hormone-inducible transmembrane protein	Ghitm	17.8117	0.781917	+		#N/A	P97360	Etv6	Transcription factor ETV6	Etv6	19.8149	0.211365	+			Q9JLM8	Dclk1	Serine/threonine-protein kinase DCLK1	Dclk1	18.0741	1.54854		+
Q91WC9	Daglb	Sn1-specific diacylglycerol lipase beta	Daglb	18.9339	0.829892		+	#N/A	Q91W36	Usp3	Ubiquitin carboxyl-terminal hydrolase 3	Usp3	20.2703	0.652761	+		#N/A	P97364	Sephs2	Selenide, water dikinase 2	Sephs2	16.6602	1.49237	+			Q9JMG3	Tmub1	Transmembrane and ubiquitin-like domain-containing protein 1	Tmub1	19.2426	0.53658		+
Q91WG4	Elp2	Elongator complex protein 2	Elp2	18.8438	0.445764		+	#N/A	Q91YT8	Tmem63a	CSC1-like protein 1	Tmem63a	18.2081	1.02374	+		#N/A	P97372	Psme2	Proteasome activator complex subunit 2	Psme2	22.0647	0.27198	+			Q9QX60	Dguok	Deoxyguanosine kinase, mitochondrial	Dguok	19.9026	1.44722		+
Q91XC8	Dap	Death-associated protein 1	Dap	22.0236	0.496551		+	#N/A	Q91Z40	Gbp7	Gbp6 protein	Gbp7	19.6338	0.80128	+		#N/A	P97430	Slpi	Antileukoproteinase	Slpi	17.896	0.77688	+			Q9QXS1	Plec	Plectin	Plec	24.2613	0.33252		+
Q91Y74	St3gal4	CMP-N-acetylneuraminate-beta-galactosamide-alpha-2,3-sialyltransferase 4	St3gal4	19.1325	0.563498		+	#N/A	Q91ZR2	Snx18	Sorting nexin-18	Snx18	18.1021	1.07128	+		#N/A	P97864	Casp7	Caspase-7	Casp7	20.7986	0.608049	+			Q9QXX4	Slc25a13	Calcium-binding mitochondrial carrier protein Aralar2	Slc25a13	19.7182	0.541465		+
Q91YU8	Ppan	Suppressor of SWI4 1 homolog	Ppan	17.4325	0.426498		+	#N/A	Q91ZU6	Dst	Dystonin	Dst	18.2055	0.888181	+		#N/A	P98078	Dab2	Disabled homolog 2	Dab2	20.1193	0.390695	+			Q9QYB5	Add3	Gamma-adducin	Add3	21.7457	0.299558		+
Q922J3	Clip1	CAP-Gly domain-containing linker protein 1	Clip1	19.2779	0.394384		+	#N/A	Q921T2	Tor1aip1	Torsin-1A-interacting protein 1	Tor1aip1	20.0555	0.349607	+		#N/A	P99029	Prdx5	Peroxiredoxin-5, mitochondrial	Prdx5	24.1154	0.607143	+			Q9R0Y5	Ak1	Adenylate kinase isoenzyme 1	Ak1	20.168	1.01011		+
Q99J09	Wdr77	Methylosome protein 50	Wdr77	19.5955	0.833122		+	#N/A	Q99J10	Ctu1	Cytoplasmic tRNA 2-thiolation protein 1	Ctu1	21.791	1.04436	+		#N/A	Q00651	Itga4	Integrin alpha-4	Itga4	18.3143	0.385939	+			Q9R111	Gda	Guanine deaminase	Gda	20.7183	0.639467		+
Q99JW2	Acy1	Aminoacylase-1	Acy1	20.6488	0.341591		+	#N/A	Q99JF5	Mvd	Diphosphomevalonate decarboxylase	Mvd	19.3661	0.816281	+		#N/A	Q00993	Axl	Tyrosine-protein kinase receptor UFO	Axl	18.1733	0.449401	+			Q9WU03	Spint2	Kunitz-type protease inhibitor 2	Spint2	19.5224	1.37584		+
Q99JY0	Hadhb	Trifunctional enzyme subunit beta, mitochondrial	Hadhb	24.3998	0.279525		+	#N/A	Q99KQ4	Nampt	Nicotinamide phosphoribosyltransferase	Nampt	21.229	0.384943	+		#N/A	Q03963	Eif2ak2	Interferon-induced, double-stranded RNA-activated protein kinase	Eif2ak2	20.5573	0.836559	+			Q9WUA3	Pfkp	ATP-dependent 6-phosphofructokinase, platelet type	Pfkp	23.4867	0.413358		+
Q99K85	Psat1	Phosphoserine aminotransferase	Psat1	19.6461	0.861363		+	#N/A	Q99L45	Eif2s2	Eukaryotic translation initiation factor 2 subunit 2	Eif2s2	21.128	0.771575	+		#N/A	Q04207	Rela	Transcription factor p65	Rela	20.2823	0.523803	+			Q9WUK4	Rfc2	Replication factor C subunit 2	Rfc2	18.9055	0.511745		+
Q99LR1	Abhd12	Monoacylglycerol lipase ABHD12	Abhd12	19.4644	0.515484		+	#N/A	Q99LL5	Pwp1	Periodic tryptophan protein 1 homolog	Pwp1	19.6797	0.46918	+		#N/A	Q04750	Top1	DNA topoisomerase 1	Top1	21.6239	0.103735	+			Q9WUM4	Coro1c	Coronin-1C	Coro1c	22.0935	0.812116		+
Q99N69	Lpxn	Leupaxin	Lpxn	17.7905	0.890378		+	#N/A	Q99M51	Nck1	Cytoplasmic protein NCK1	Nck1	19.2056	0.556006	+		#N/A	Q05144	Rac2	Ras-related C3 botulinum toxin substrate 2	Rac2	25.3406	0.307999	+			Q9WVA2	Timm8a1	Mitochondrial import inner membrane translocase subunit Tim8 A	Timm8a1	19.0569	0.920314		+
Q9CQ73	Pkp2	Plakophilin 2	Pkp2	20.345	0.252291		+	#N/A	Q99MK8	Grk2	Beta-adrenergic receptor kinase 1	Grk2	18.757	0.737283	+		#N/A	Q05769	Ptgs2	Prostaglandin G/H synthase 2	Ptgs2	18.2659	1.1288	+			Q9Z0M5	Lipa	Lysosomal acid lipase/cholesteryl ester hydrolase	Lipa	18.715	0.416109		+
Q9CQF3	Nudt21	Cleavage and polyadenylation specificity factor subunit 5	Nudt21	19.2759	0.352948		+	#N/A	Q99N57	Raf1	RAF proto-oncogene serine/threonine-protein kinase	Raf1	18.8954	0.464943	+		#N/A	Q06180	Ptpn2	Tyrosine-protein phosphatase non-receptor type 2	Ptpn2	17.1588	0.765212	+			Q9Z1G4	Atp6v0a1	V-type proton ATPase 116 kDa subunit a isoform 1	Atp6v0a1	18.7103	1.21063		+
Q9CQF9	Pcyox1	Prenylcysteine oxidase	Pcyox1	19.5402	0.801183		+	#N/A	Q99PG2	Ogfr	Opioid growth factor receptor	Ogfr	19.0495	0.635258	+		#N/A	Q09014	Ncf1	Neutrophil cytosol factor 1	Ncf1	20.6649	0.667419	+			Q9Z1K5	Arih1	E3 ubiquitin-protein ligase ARIH1	Arih1	18.8474	0.274196		+
Q9CR57	Rpl14	60S ribosomal protein L14	Rpl14	21.0835	1.00762		+	#N/A	Q9CQA9	Ntpcr	Cancer-related nucleoside-triphosphatase homolog	Ntpcr	15.9551	1.40125	+		#N/A	Q09199	B4galnt2	Beta-1,4 N-acetylgalactosaminyltransferase 2	B4galnt2	21.4488	0.600506	+			A0A0A6YVW3;A0A0A6YXA5	Ighv1-15;Ighv1-23	Immunoglobulin heavy variable V1-23 (Fragment)	Ighv1-15	19.3934	1.20023
Q9CWJ9	Atic	Bifunctional purine biosynthesis protein PURH	Atic	22.6452	0.455256		+	#N/A	Q9CQJ6	Denr	Density-regulated protein	Denr	20.5445	1.31572	+		#N/A	Q0VGB7	Ppp4r2	Serine/threonine-protein phosphatase 4 regulatory subunit 2	Ppp4r2	18.4425	0.778683	+			A0A0A6YXW6	Igha	Immunoglobulin heavy constant alpha (Fragment)	Igha	22.8331	0.657409
Q9CY66	Gar1	H/ACA ribonucleoprotein complex subunit 1	Gar1	20.9362	0.181397		+	#N/A	Q9CQW9	Ifitm3	Interferon-induced transmembrane protein 3	Ifitm3	20.4609	1.04205	+		#N/A	Q2TBA3	Malt1	Mucosa-associated lymphoid tissue lymphoma translocation protein 1 homolog	Malt1	18.642	0.386066	+			A0A0B4J1G0	Fcgr4	Low affinity immunoglobulin gamma Fc region receptor IV	Fcgr4	18.7869	1.65555
Q9CZV8	Fbxl20	F-box/LRR-repeat protein 20	Fbxl20	16.7521	0.803856		+	#N/A	Q9CRY7	Gdpd1	Lysophospholipase D GDPD1	Gdpd1	20.75	0.787848	+		#N/A	Q3THS6	Mat2a	S-adenosylmethionine synthase isoform type-2	Mat2a	20.9303	0.0921345	+			A0A0G2JG52	Crybg1	Crystallin beta-gamma domain-containing 1	Crybg1	19.1969	0.364334
Q9D0K2	Oxct1	Succinyl-CoA:3-ketoacid coenzyme A transferase 1, mitochondrial	Oxct1	22.2725	0.529242		+	#N/A	Q9CZD3	Gars	Glycine--tRNA ligase	Gars	21.3788	0.630613	+		#N/A	Q3TJD7	Pdlim7	PDZ and LIM domain protein 7	Pdlim7	23.1604	0.673511	+			A0A0J9YUD5	Nup205	Nucleoporin 205	Nup205	19.3653	0.560553
Q9D1R2	Kti12	Protein KTI12 homolog	Kti12	19.6131	0.159697		+	#N/A	Q9CZE3	Rab32	Ras-related protein Rab-32	Rab32	19.4963	0.317375	+		#N/A	Q3TKY6	Cwc27	Spliceosome-associated protein CWC27 homolog	Cwc27	18.509	0.258089	+			A0A0U1RNF2	Lcmt1	Leucine carboxyl methyltransferase 1	Lcmt1	18.708	0.308087
Q9D1T5	Prr15	Proline-rich protein 15	Prr15	20.1016	0.471765		+	#N/A	Q9D0Q7	Mrpl45	39S ribosomal protein L45, mitochondrial	Mrpl45	19.8547	0.373882	+		#N/A	Q3TN34	Micall2	MICAL-like protein 2	Micall2	17.8698	0.793899	+			A0A140LIJ4	Dnah14	Dynein, axonemal, heavy chain 14	Dnah14	20.5484	0.535626
Q9D379	Ephx1	Epoxide hydrolase 1	Ephx1	22.4332	0.144119		+	#N/A	Q9D0R2	Tars	Threonine--tRNA ligase, cytoplasmic	Tars	21.7239	0.42722	+		#N/A	Q3TVI8	Pbxip1	Pre-B-cell leukemia transcription factor-interacting protein 1	Pbxip1	20.4242	0.615948	+			A0A1L1SQU7	Fat1	FAT atypical cadherin 1	Fat1	17.7941	0.335365
Q9D7G0	Prps1	Ribose-phosphate pyrophosphokinase 1	Prps1	20.2613	0.314077		+	#N/A	Q9D1M4	Eef1e1	Eukaryotic translation elongation factor 1 epsilon-1	Eef1e1	19.3073	0.340141	+		#N/A	Q3U5Q7	Cmpk2	UMP-CMP kinase 2, mitochondrial	Cmpk2	19.0212	0.141694	+			A0A2R8VHP3	Gm5478	Uncharacterized protein	Gm5478	24.3862	1.90292
Q9D7X3	Dusp3	Dual specificity protein phosphatase 3	Dusp3	20.1337	0.249639		+	#N/A	Q9D281	Fam114a1	Protein Noxp20	Fam114a1	19.7691	0.395955	+		#N/A	Q3UW53	Fam129a	Protein Niban	Fam129a	22.5152	0.283861	+			A1L314	Mpeg1	Macrophage-expressed gene 1 protein	Mpeg1	17.9588	1.32258
Q9D8U8	Snx5	Sorting nexin-5	Snx5	20.1747	0.46901		+	#N/A	Q9D620	Rab11fip1	Rab11 family-interacting protein 1	Rab11fip1	17.6503	0.497129	+		#N/A	Q3UZA1	Rcsd1	CapZ-interacting protein	Rcsd1	16.8513	1.8692	+			A2A432	Cul4b	Cullin-4B	Cul4b	17.8746	0.739409
Q9DBS5	Klc4	Kinesin light chain 4	Klc4	20.4728	0.384574		+	#N/A	Q9D820	Prorsd1	Prolyl-tRNA synthetase associated domain-containing protein 1	Prorsd1	19.9834	0.507621	+		#N/A	Q4VBD2	Tapt1	Transmembrane anterior posterior transformation protein 1	Tapt1	17.792	0.519582	+			A2A484	Zmynd8	Zinc finger, MYND-type-containing 8	Zmynd8	17.5785	0.824393
Q9DBT5	Ampd2	AMP deaminase 2	Ampd2	19.3657	0.604766		+	#N/A	Q9D832	Dnajb4	DnaJ homolog subfamily B member 4	Dnajb4	19.3064	0.458979	+		#N/A	Q5EBG6	Hspb6	Heat shock protein beta-6	Hspb6	21.8111	0.474437	+			A2A4P0	Dhx8	ATP-dependent RNA helicase DHX8	Dhx8	18.9275	0.200866
Q9DCL9	Paics	Multifunctional protein ADE2	Paics	21.3054	0.197219		+	#N/A	Q9D8C4	Ifi35	Interferon-induced 35 kDa protein homolog	Ifi35	19.3224	0.753244	+		#N/A	Q5RKZ7	Mocs1	Molybdenum cofactor biosynthesis protein 1	Mocs1	18.2733	0.931186	+			A2A5R2	Arfgef2	Brefeldin A-inhibited guanine nucleotide-exchange protein 2	Arfgef2	18.4756	0.953994
Q9DCZ1	Gmpr	GMP reductase 1	Gmpr	19.825	0.498175		+	#N/A	Q9DAI2	Ift22	Intraflagellar transport protein 22 homolog	Ift22	16.7886	0.406387	+		#N/A	Q5SUA5	Myo1g	Unconventional myosin-Ig	Myo1g	19.7035	0.445304	+			A2A7S8	Kiaa1522	Uncharacterized protein KIAA1522	Kiaa1522	20.097	0.599949
Q9EQ08	Sgsh	Heparan N-sulfatase	Sgsh	17.7867	2.10625		+	#N/A	Q9DBK7	Uba7	MCG18845, isoform CRA_d	Uba7	18.9753	1.15427	+		#N/A	Q60590	Orm1	Alpha-1-acid glycoprotein 1	Orm1	15.2446	2.44969	+			A2A863	Itgb4	Integrin beta-4	Itgb4	21.9558	0.461567
Q9ERT9	Ppp1r1a	Protein phosphatase 1 regulatory subunit 1A	Ppp1r1a	16.731	0.667009		+	#N/A	Q9DBR3	Armc8	Armadillo repeat-containing protein 8	Armc8	18.9389	1.07379	+		#N/A	Q60710	Samhd1	Deoxynucleoside triphosphate triphosphohydrolase SAMHD1	Samhd1	23.0535	0.419538	+			A2A8L5	Ptprf	Receptor-type tyrosine-protein phosphatase F	Ptprf	18.9026	0.833693
Q9ES70	Nek6	Serine/threonine-protein kinase Nek6	Nek6	16.3265	0.534162		+	#N/A	Q9DBX3	Susd2	Sushi domain-containing protein 2	Susd2	21.9727	0.322324	+		#N/A	Q60715	P4ha1	Prolyl 4-hydroxylase subunit alpha-1	P4ha1	18.2478	0.874551	+			A2AAY5	Sh3pxd2b	SH3 and PX domain-containing protein 2B	Sh3pxd2b	19.1497	0.842091
Q9ESX5	Dkc1	H/ACA ribonucleoprotein complex subunit DKC1	Dkc1	21.1385	0.343144		+	#N/A	Q9DCE9	Igtp	Interferon gamma-induced GTPase	Igtp	17.5536	0.684768	+		#N/A	Q60778	Nfkbib	NF-kappa-B inhibitor beta	Nfkbib	17.0248	0.333965	+			A2AB59	Arhgap27	Rho GTPase-activating protein 27	Arhgap27	18.6453	0.844864
Q9ESY9	Ifi30	Gamma-interferon-inducible lysosomal thiol reductase	Ifi30	17.6821	1.03245		+	#N/A	Q9ERI2	Rab27a	Ras-related protein Rab-27A	Rab27a	19.8741	0.53957	+		#N/A	Q60780	Gas7	Growth arrest-specific protein 7	Gas7	17.4549	0.931483	+			A2ABU4	Myom3	Myomesin-3	Myom3	18.7274	1.32542
Q9ESZ8	Gtf2i	General transcription factor II-I	Gtf2i	20.0603	0.258915		+	#N/A	Q9ET26	Rnf114	E3 ubiquitin-protein ligase RNF114	Rnf114	18.9703	0.94532	+		#N/A	Q60787	Lcp2	Lymphocyte cytosolic protein 2	Lcp2	18.9064	0.836507	+			A2ACP1	Ttc39a	Tetratricopeptide repeat protein 39A	Ttc39a	20.7311	1.08418
Q9ET30	Tm9sf3	Transmembrane 9 superfamily member 3	Tm9sf3	19.9652	0.376698		+	#N/A	Q9JI90	Rnf14	E3 ubiquitin-protein ligase RNF14	Rnf14	18.61	0.229789	+		#N/A	Q60963	Pla2g7	Platelet-activating factor acetylhydrolase	Pla2g7	18.7568	1.26895	+			A2ADY9	Ddi2	Protein DDI1 homolog 2	Ddi2	21.4808	0.50204
Q9JJD0	Thap11	THAP domain-containing protein 11	Thap11	17.7449	0.657748		+	#N/A	Q9JIB4	Gtf2h2	General transcription factor IIH subunit 2	Gtf2h2	17.9344	0.347167	+		#N/A	Q60974	Ncor1	Nuclear receptor corepressor 1	Ncor1	18.2627	0.204226	+			A2AFS3	Kiaa1324	UPF0577 protein KIAA1324	Kiaa1324	17.9113	0.457364
Q9JJG0	Tacc2	Transforming acidic coiled-coil-containing protein 2	Tacc2	19.6696	0.185919		+	#N/A	Q9JIK5	Ddx21	Nucleolar RNA helicase 2	Ddx21	20.4761	0.512368	+		#N/A	Q61024	Asns	Asparagine synthetase [glutamine-hydrolyzing]	Asns	20.6395	0.354191	+			A2AGT5	Ckap5	Cytoskeleton-associated protein 5	Ckap5	19.3867	0.17861
Q9JJZ2	Tuba8	Tubulin alpha-8 chain	Tuba8	20.0874	0.149139		+	#N/A	Q9JIY5	Htra2	Serine protease HTRA2, mitochondrial	Htra2	18.9092	1.29192	+		#N/A	Q61093	Cybb	Cytochrome b-245 heavy chain	Cybb	19.9831	0.670817	+			A2AI08	Tprn	Taperin	Tprn	19.0076	0.274351
Q9JL62	Gltp	Glycolipid transfer protein	Gltp	19.4635	0.632304		+	#N/A	Q9JM13	Rabgef1	Rab5 GDP/GTP exchange factor	Rabgef1	17.3981	0.90247	+		#N/A	Q61147	Cp	Ceruloplasmin	Cp	22.8922	0.662694	+			A2AIX1	Sec16a	Protein transport protein sec16	Sec16a	19.2313	0.300392
Q9JLM8	Dclk1	Serine/threonine-protein kinase DCLK1	Dclk1	17.6969	0.463081		+	#N/A	Q9JM51	Ptges	Prostaglandin E synthase	Ptges	18.75	0.648492	+		#N/A	Q61235	Sntb2	Beta-2-syntrophin	Sntb2	21.374	0.470405	+			A2AJ76	Hmcn2	Hemicentin-2	Hmcn2	19.0999	0.790651
Q9JMG3	Tmub1	Transmembrane and ubiquitin-like domain-containing protein 1	Tmub1	19.4311	0.28432		+	#N/A	Q9JMH6	Txnrd1	Thioredoxin reductase 1, cytoplasmic	Txnrd1	22.1566	0.672383	+		#N/A	Q61333	Tnfaip2	Tumor necrosis factor alpha-induced protein 2	Tnfaip2	17.3829	0.489628	+			A2AJI0	Map7d1	MAP7 domain-containing protein 1	Map7d1	18.7225	0.217027
Q9QX60	Dguok	Deoxyguanosine kinase, mitochondrial	Dguok	20.5162	0.321093		+	#N/A	Q9QUH0	Glrx	Glutaredoxin-1	Glrx	19.0817	0.885111	+		#N/A	Q61510	Trim25	E3 ubiquitin/ISG15 ligase TRIM25	Trim25	19.758	0.198726	+			A2AN08	Ubr4	E3 ubiquitin-protein ligase UBR4	Ubr4	20.1371	0.384296
Q9QXS1	Plec	Plectin	Plec	24.2637	0.0550084		+	#N/A	Q9QYF1	Rdh11	Retinol dehydrogenase 11	Rdh11	18.7181	0.789681	+		#N/A	Q61553	Fscn1	Fascin	Fscn1	21.0735	0.252612	+			A2ANX3	Atp8b4	Phospholipid-transporting ATPase	Atp8b4	20.8979	1.46475
Q9QXX4	Slc25a13	Calcium-binding mitochondrial carrier protein Aralar2	Slc25a13	20.0615	0.346203		+	#N/A	Q9QYI5	Dnajb2	DnaJ homolog subfamily B member 2	Dnajb2	18.3693	0.946602	+		#N/A	Q61635	Ifi47	GTP-binding protein	Ifi47	20.2975	0.458634	+			A2ANY6	Mdn1	Midasin	Mdn1	17.8895	0.767362
Q9QYB5	Add3	Gamma-adducin	Add3	22.3983	0.250163		+	#N/A	Q9QZD8	Slc25a10	Mitochondrial dicarboxylate carrier	Slc25a10	21.1362	0.673782	+		#N/A	Q61646	Hp	Haptoglobin	Hp	23.6608	1.01498	+			A2AQ25	Skt	Sickle tail protein	Skt	19.8318	0.741725
Q9QZF2	Gpc1	Glypican-1	Gpc1	17.7057	0.745288		+	#N/A	Q9R118	Htra1	Serine protease HTRA1	Htra1	16.4178	0.858015	+		#N/A	Q61712	Dnajc1	DnaJ homolog subfamily C member 1	Dnajc1	18.1917	0.929578	+			A2AQ99	Duox2	Dual oxidase 2	Duox2	20.0781	0.500551
Q9R045	Angptl2	Angiopoietin-related protein 2	Angptl2	17.114	0.367014		+	#N/A	Q9R233	Tapbp	Tapasin	Tapbp	20.1825	1.12585	+		#N/A	Q62191	Trim21	E3 ubiquitin-protein ligase TRIM21	Trim21	17.014	0.833881	+			A2ASS6	Ttn	Titin	Ttn	20.6792	0.939408
Q9R0Y5	Ak1	Adenylate kinase isoenzyme 1	Ak1	22.042	0.859026		+	#N/A	Q9WTK0	Nupr1	Nuclear protein 1	Nupr1	18.1389	0.582073	+		#N/A	Q63850	Nup62	Nuclear pore glycoprotein p62	Nup62	18.5966	0.403312	+			A2AWA9	Rabgap1	Rab GTPase-activating protein 1	Rabgap1	18.7428	0.777093
Q9R111	Gda	Guanine deaminase	Gda	19.9887	0.52171		+	#N/A	Q9WTK5	Nfkb2	Nuclear factor NF-kappa-B p100 subunit	Nfkb2	18.6218	0.69761	+		#N/A	Q64112	Ifit2	Interferon-induced protein with tetratricopeptide repeats 2	Ifit2	14.8666	1.16893	+			A2AWP8	Arhgef10l	Rho guanine nucleotide exchange factor 10-like protein	Arhgef10l	18.5724	0.43982
Q9WU03	Spint2	Kunitz-type protease inhibitor 2	Spint2	19.0405	0.480731		+	#N/A	Q9WV92	Epb41l3	Band 4.1-like protein 3	Epb41l3	20.2937	0.663501	+		#N/A	Q64282	Ifit1	Interferon-induced protein with tetratricopeptide repeats 1	Ifit1	18.7522	0.65606	+			A2AX52	Col6a4	Collagen alpha-4(VI) chain	Col6a4	20.0637	0.814968
Q9WUA3	Pfkp	ATP-dependent 6-phosphofructokinase, platelet type	Pfkp	23.6282	0.251551		+	#N/A	Q9WVB0	Rbpms	RNA-binding protein with multiple splicing	Rbpms	20.4675	0.944968	+		#N/A	Q64310	Surf4	Surfeit locus protein 4	Surf4	18.81	1.19536	+			A2BE28	Las1l	Ribosomal biogenesis protein LAS1L	Las1l	17.9081	0.700787
Q9WUK4	Rfc2	Replication factor C subunit 2	Rfc2	18.8618	0.974657		+	#N/A	Q9WVK4	Ehd1	EH domain-containing protein 1	Ehd1	21.9529	0.541461	+		#N/A	Q64321	Zbtb7b	Zinc finger and BTB domain-containing protein 7B	Zbtb7b	18.5182	0.108497	+			A2BH40	Arid1a	AT-rich interactive domain-containing protein 1A	Arid1a	18.6862	0.436815
Q9WUM4	Coro1c	Coronin-1C	Coro1c	22.7543	0.750332		+	#N/A	Q9WVL2	Stat2	Signal transducer and activator of transcription 2	Stat2	18.0144	0.833838	+		#N/A	Q64455	Ptprj	Receptor-type tyrosine-protein phosphatase eta	Ptprj	17.9341	0.257178	+			A3KFX0	Nt5c1a	Cytosolic 5'-nucleotidase 1A	Nt5c1a	17.3934	0.863035
Q9WVA2	Timm8a1	Mitochondrial import inner membrane translocase subunit Tim8 A	Timm8a1	19.1969	0.679297		+	#N/A	Q9Z0E6	Gbp2	Guanylate-binding protein 2	Gbp2	18.7612	0.626896	+		#N/A	Q64471	Gstt1	Glutathione S-transferase theta-1	Gstt1	21.9234	0.723975	+			A3KGB4	Tbc1d8b	TBC1 domain family member 8B	Tbc1d8b	18.2938	0.127946
Q9Z0M5	Lipa	Lysosomal acid lipase/cholesteryl ester hydrolase	Lipa	17.3772	1.75698		+	#N/A	Q9Z2B9	Rps6ka4	Ribosomal protein S6 kinase alpha-4	Rps6ka4	18.3913	0.487513	+		#N/A	Q6DIB4	Nol4l	Nucleolar protein 4-like	Nol4l	17.106	1.21789	+			A3KMP2	Ttc38	Tetratricopeptide repeat protein 38	Ttc38	20.4634	0.466618
Q9Z1G4	Atp6v0a1	V-type proton ATPase 116 kDa subunit a isoform 1	Atp6v0a1	19.3466	0.522993		+	#N/A	A0A0A6YY83	Pcdh7	Protocadherin 7	Pcdh7	18.562	0.314028		+	#N/A	Q6EDY6	Carmil1	F-actin-uncapping protein LRRC16A	Carmil1	18.3511	0.442353	+			A6H584	Col6a5	Collagen alpha-5(VI) chain	Col6a5	18.3485	0.684666
Q9Z1K5	Arih1	E3 ubiquitin-protein ligase ARIH1	Arih1	18.49	0.40261		+	#N/A	A1L3P4	Slc9a6	Sodium/hydrogen exchanger	Slc9a6	15.8512	1.37219		+	#N/A	Q6PDH0	Phldb1	Pleckstrin homology-like domain family B member 1	Phldb1	18.7262	0.159328	+			A6H5Y3	Mtr	Methionine synthase	Mtr	17.2842	0.856121
Q9Z2S7	Tsc22d3	TSC22 domain family protein 3	Tsc22d3	18.6483	0.901977		+	#N/A	A2A8Z1	Osbpl9	Oxysterol-binding protein-related protein 9	Osbpl9	18.8111	0.802963		+	#N/A	Q6Q899	Ddx58	Probable ATP-dependent RNA helicase DDX58	Ddx58	19.7195	0.444079	+			A6H6A9	Rabgap1l	Rab GTPase-activating protein 1-like	Rabgap1l	18.2477	0.3877
A0A075B5S2	Ighv7-1	Uncharacterized protein (Fragment)	Ighv7-1	17.7788	1.54353			#N/A	A2AJ88	Pnpla7	Patatin-like phospholipase domain-containing protein 7	Pnpla7	19.2299	0.0943867		+	#N/A	Q6ZPF4	Fmnl3	Formin-like protein 3	Fmnl3	18.2624	0.654689	+			A6PWY0	Gm15557	Growth differentiation factor 5 opposite strand	Gm15557	24.0914	1.5274
A0A075B5T2	Ighv6-3	Immunoglobulin heavy variable 6-3 (Fragment)	Ighv6-3	18.3496	0.751773			#N/A	A6H8H2	Dennd4c	DENN domain-containing protein 4C	Dennd4c	20.154	0.580695		+	#N/A	Q6ZQ58	Larp1	La-related protein 1	Larp1	20.7483	0.311492	+			A6X935	Itih4	Inter alpha-trypsin inhibitor, heavy chain 4	Itih4	20.3343	1.59853
A0A087WQ44	Srcap	Snf2-related CREBBP activator protein	Srcap	16.8944	0.91225			#N/A	B2RQC6	Cad	CAD protein	Cad	20.4706	0.33608		+	#N/A	Q6ZQL4	Wdr43	WD repeat-containing protein 43	Wdr43	18.9419	0.432157	+			A6ZI47	Aldoart2	Fructose-bisphosphate aldolase	Aldoart2	18.7949	1.54264
A0A0A6YVW3;A0A0A6YXA5	Ighv1-15;Ighv1-23	Immunoglobulin heavy variable V1-23 (Fragment)	Ighv1-15	19.7444	0.590076			#N/A	D3Z7P3	Gls	Glutaminase kidney isoform, mitochondrial	Gls	20.2674	0.90379		+	#N/A	Q78YZ6	Scoc	Short coiled-coil protein	Scoc	16.7692	0.673599	+			A8DUK4	Hbb-bs	Beta-globin	Hbb-bs	24.7781	0.826321
A0A0A6YXW6	Igha	Immunoglobulin heavy constant alpha (Fragment)	Igha	23.7466	0.309888			#N/A	E9PWR4	Dip2c	Disco-interacting protein 2 homolog C	Dip2c	18.8061	0.327555		+	#N/A	Q793I8	Tifa	TRAF-interacting protein with FHA domain-containing protein A	Tifa	17.0941	0.792302	+			A9JSM3	Tmem238	Transmembrane protein 238	Tmem238	18.4174	0.572339
A0A0B4J1F9	Tchh	Trichohyalin	Tchh	21.0321	0.554961			#N/A	E9PYG6	Rasa1	RAS p21 protein activator 1	Rasa1	17.9161	0.346271		+	#N/A	Q7TSF4	Lrrc75a	Leucine-rich repeat-containing protein 75A	Lrrc75a	16.3638	0.647414	+			B1ARD6	Slfn9	Schlafen family member 9	Slfn9	17.2852	1.53635
A0A0B4J1J6	Ighv10-1	Immunoglobulin heavy variable 10-1 (Fragment)	Ighv10-1	19.6976	0.488221			#N/A	E9PZQ0	Ryr1	Ryanodine receptor 1	Ryr1	20.0065	0.892798		+	#N/A	Q80TM9	Nisch	Nischarin	Nisch	18.9186	0.0878297	+			B1ART2	Vps13d	Vacuolar protein sorting 13D	Vps13d	17.7861	1.13342
A0A0G2JG52	Crybg1	Crystallin beta-gamma domain-containing 1	Crybg1	18.6341	0.278145			#N/A	E9Q0S6	Tns1	Tensin 1	Tns1	23.5753	0.265796		+	#N/A	Q80UW5	Cdc42bpg	Serine/threonine-protein kinase MRCK gamma	Cdc42bpg	18.0118	0.497704	+			B1AUN2	Eif2b3	Eukaryotic translation initiation factor 2B, subunit 3	Eif2b3	19.6739	0.170259
A0A0J9YUD5	Nup205	Nucleoporin 205	Nup205	19.5758	0.258288			#N/A	E9Q5C9	Nolc1	Nucleolar and coiled-body phosphoprotein 1	Nolc1	19.9308	0.471065		+	#N/A	Q80WJ7	Mtdh	Protein LYRIC	Mtdh	21.9461	0.234189	+			B1AVH7	Tbc1d2	TBC1 domain family member 2A	Tbc1d2	19.814	0.824211
A0A0U1RNF2	Lcmt1	Leucine carboxyl methyltransferase 1	Lcmt1	19.3997	0.362028			#N/A	E9Q616	Ahnak	AHNAK nucleoprotein (desmoyokin)	Ahnak	24.2958	0.426416		+	#N/A	Q80WT5	Aftph	Aftiphilin	Aftph	19.189	0.40422	+			B1AVK5	Col4a6	Collagen, type IV, alpha 6	Col4a6	17.695	0.604838
A0A140LIJ4	Dnah14	Dynein, axonemal, heavy chain 14	Dnah14	20.8176	0.535425			#N/A	E9QAS7	Inpp5a	Inositol polyphosphate-5-phosphatase A	Inpp5a	19.0456	1.94535		+	#N/A	Q80X90	Flnb	Filamin-B	Flnb	23.0578	0.184061	+			B1AY13	Usp24	Ubiquitin carboxyl-terminal hydrolase 24	Usp24	17.9653	0.640192
A0A140T8P6	Igkv12-46	Immunoglobulin kappa variable 12-46 (Fragment)	Igkv12-46	17.5863	0.58326			#N/A	O08583	Alyref	THO complex subunit 4	Alyref	22.2695	0.701647		+	#N/A	Q810U5	Ccdc50	Coiled-coil domain-containing protein 50	Ccdc50	17.0651	1.42754	+			B1AYL1	Scn7a	Sodium channel protein	Scn7a	18.8548	0.472194
A0A1L1SQU7	Fat1	FAT atypical cadherin 1	Fat1	17.923	0.158976			#N/A	O08738	Casp6	Caspase-6	Casp6	19.0863	0.732725		+	#N/A	Q8BG95	Ppp1r12b	Protein phosphatase 1 regulatory subunit 12B	Ppp1r12b	21.6747	0.272936	+			B1AZA5	Tmem245	Transmembrane protein 245	Tmem245	19.2073	1.21831
A0A2I3BQG2	Crybg2	Crystallin beta-gamma domain-containing 2	Crybg2	17.3948	0.370778			#N/A	O35566	Cd151	CD151 antigen	Cd151	20.6972	1.09776		+	#N/A	Q8BGQ7	Aars	Alanine--tRNA ligase, cytoplasmic	Aars	21.8239	0.266766	+			B1AZI6	Thoc2	THO complex subunit 2	Thoc2	18.2612	0.354657
A0A2R8VHP3	Gm5478	Uncharacterized protein	Gm5478	24.0424	2.37119			#N/A	O35678	Mgll	Monoglyceride lipase	Mgll	21.4544	0.611194		+	#N/A	Q8BH59	Slc25a12	Calcium-binding mitochondrial carrier protein Aralar1	Slc25a12	22.1447	0.232462	+			B2RQG2	Phf3	PHD finger protein 3	Phf3	17.3838	0.754644
A2A432	Cul4b	Cullin-4B	Cul4b	17.9558	0.319774			#N/A	O54890	Itgb3	Integrin beta-3	Itgb3	20.2197	0.202465		+	#N/A	Q8BTY2	Slc4a7	Sodium bicarbonate cotransporter 3	Slc4a7	18.5216	0.350034	+			B2RRE7	Otud4	OTU domain-containing protein 4	Otud4	18.9733	0.385563
A2A484	Zmynd8	Zinc finger, MYND-type-containing 8	Zmynd8	17.3988	0.60088			#N/A	O70145	Ncf2	Neutrophil cytosol factor 2	Ncf2	17.3346	0.497014		+	#N/A	Q8BYI6	Lpcat2	Lysophosphatidylcholine acyltransferase 2	Lpcat2	19.9543	0.162656	+			B2RSH2	Gnai1	Guanine nucleotide-binding protein G(i) subunit alpha-1	Gnai1	18.9584	0.673078
A2A5R2	Arfgef2	Brefeldin A-inhibited guanine nucleotide-exchange protein 2	Arfgef2	19.3154	0.596152			#N/A	O70309	Itgb5	Integrin beta-5	Itgb5	18.8036	0.298713		+	#N/A	Q8BYY4	Ttc39b	Tetratricopeptide repeat protein 39B	Ttc39b	18.2486	0.280106	+			B2RUP2	Unc13d	Protein unc-13 homolog D	Unc13d	16.2833	0.738345
A2A6A1	Gpatch8	G patch domain-containing protein 8	Gpatch8	17.9132	0.276832			#N/A	O88428	Papss2	Bifunctional 3'-phosphoadenosine 5'-phosphosulfate synthase 2	Papss2	22.4438	0.700222		+	#N/A	Q8BYZ1	Abi3	ABI gene family member 3	Abi3	18.0327	0.50051	+			B2RUR8	Otud7b	OTU domain-containing protein 7B	Otud7b	18.0177	0.293679
A2A7S8	Kiaa1522	Uncharacterized protein KIAA1522	Kiaa1522	19.971	0.687289			#N/A	O88455	Dhcr7	7-dehydrocholesterol reductase	Dhcr7	21.6481	0.641156		+	#N/A	Q8BZ20	Parp12	Poly [ADP-ribose] polymerase 12	Parp12	19.5345	0.173578	+			B2RX12	Abcc3	Canalicular multispecific organic anion transporter 2	Abcc3	19.9473	0.785322
A2A863	Itgb4	Integrin beta-4	Itgb4	22.0008	0.0992034			#N/A	O88844	Idh1	Isocitrate dehydrogenase [NADP] cytoplasmic	Idh1	23.246	0.415685		+	#N/A	Q8C025	Chpt1	Cholinephosphotransferase 1	Chpt1	18.4975	0.440302	+			B2RXC1	Trappc11	Trafficking protein particle complex subunit 11	Trappc11	18.5593	1.64119
A2A8L5	Ptprf	Receptor-type tyrosine-protein phosphatase F	Ptprf	18.6626	0.850841			#N/A	O88876	Dhrs3	Short-chain dehydrogenase/reductase 3	Dhrs3	18.9716	1.46129		+	#N/A	Q8C0T5	Sipa1l1	Signal-induced proliferation-associated 1-like protein 1	Sipa1l1	16.8966	0.518772	+			B2RXC2	Itpkb	Kinase	Itpkb	17.9305	0.677587
A2A8U2	Tmem201	Transmembrane protein 201	Tmem201	18.3296	0.573444			#N/A	O88958	Gnpda1	Glucosamine-6-phosphate isomerase 1	Gnpda1	18.9804	0.790074		+	#N/A	Q8C4Q6	Aida	Axin interactor, dorsalization-associated protein	Aida	19.6838	0.363581	+			B2RXQ2	Ppfia1	Ppfia1 protein	Ppfia1	18.353	0.657574
A2A9K7	Cnksr1	Connector enhancer of kinase suppressor of Ras 1	Cnksr1	17.8385	0.687871			#N/A	P01910	H2-Aa	H-2 class II histocompatibility antigen, A-K alpha chain	H2-Aa	18.5634	1.14875		+	#N/A	Q8C4V1	Arhgap24	Rho GTPase-activating protein 24	Arhgap24	17.1908	0.615611	+			B2RXR6	Ankrd44	Serine/threonine-protein phosphatase 6 regulatory ankyrin repeat subunit B	Ankrd44	16.8074	0.292364
A2AAJ9	Obscn	Obscurin	Obscn	20.5524	1.48673			#N/A	P04370	Mbp	Myelin basic protein	Mbp	18.6034	0.923069		+	#N/A	Q8CBY8	Dctn4	Dynactin subunit 4	Dctn4	19.076	0.736735	+			B2RXS4	Plxnb2	Plexin-B2	Plxnb2	21.4739	0.526694
A2AB59	Arhgap27	Rho GTPase-activating protein 27	Arhgap27	19.0606	0.797149			#N/A	P04441	Cd74	H-2 class II histocompatibility antigen gamma chain	Cd74	17.7598	1.26818		+	#N/A	Q8CI15	Sphk1	Sphingosine kinase 1	Sphk1	18.4176	1.07276	+			B2RY04	Dock5	Dedicator of cytokinesis protein 5	Dock5	18.1719	0.963453
A2ABU4	Myom3	Myomesin-3	Myom3	21.4536	1.25956			#N/A	P08003	Pdia4	Protein disulfide-isomerase A4	Pdia4	21.6914	0.340196		+	#N/A	Q8K012	Fnbp1l	Formin-binding protein 1-like	Fnbp1l	17.5732	0.675868	+			B2RY56	Rbm25	RNA-binding protein 25	Rbm25	20.525	0.694279
A2ACP1	Ttc39a	Tetratricopeptide repeat protein 39A	Ttc39a	20.4172	0.334598			#N/A	P0C0S6;Q3THW5	H2afv;H2afz	Histone H2A.Z	H2afv	23.3242	0.457047		+	#N/A	Q8K094	Pvr	Poliovirus receptor	Pvr	19.5046	0.299948	+			B5THE2	Mgam	Maltase-glucoamylase	Mgam	19.5559	1.24522
A2ADY9	Ddi2	Protein DDI1 homolog 2	Ddi2	20.9934	0.431915			#N/A	P10107	Anxa1	Annexin A1	Anxa1	24.4132	0.443076		+	#N/A	Q8K1H1	Tdrd7	Tudor domain-containing protein 7	Tdrd7	17.6803	0.340499	+			B9EJ80	Pdzd8	PDZ domain-containing protein 8	Pdzd8	18.1938	0.889313
A2AF47	Dock11	Dedicator of cytokinesis protein 11	Dock11	18.1527	0.808259			#N/A	P10417	Bcl2	Apoptosis regulator Bcl-2	Bcl2	16.4104	0.212003		+	#N/A	Q8K3H0	Appl1	DCC-interacting protein 13-alpha	Appl1	20.058	0.277045	+			B9EJ86	Osbpl8	Oxysterol-binding protein-related protein 8	Osbpl8	18.646	1.51929
A2AFS3	Kiaa1324	UPF0577 protein KIAA1324	Kiaa1324	17.8811	0.557387			#N/A	P11276	Fn1	Fibronectin	Fn1	23.9181	0.409723		+	#N/A	Q8K482	Emilin2	EMILIN-2	Emilin2	18.7452	1.47791	+			B9EJR8	Dnaaf5	Dynein assembly factor 5, axonemal	Dnaaf5	17.8746	0.600908
A2AGT5	Ckap5	Cytoskeleton-associated protein 5	Ckap5	19.5546	0.393821			#N/A	P12265	Gusb	Beta-glucuronidase	Gusb	20.1581	0.756435		+	#N/A	Q8R1B4	Eif3c	Eukaryotic translation initiation factor 3 subunit C	Eif3c	21.7617	0.113658	+			B9EKI3	Tmf1	TATA element modulatory factor	Tmf1	18.6777	0.427636
A2AI08	Tprn	Taperin	Tprn	19.025	0.473908			#N/A	P13808	Slc4a2	Anion exchange protein 2	Slc4a2	18.6399	0.200199		+	#N/A	Q8R2Q8	Bst2	Bone marrow stromal antigen 2	Bst2	19.0934	0.389944	+			C0HKD8;C0HKD9	Mfap1a;Mfap1b	Microfibrillar-associated protein 1A	Mfap1a	19.2322	0.292467
A2AIV2	Virma	Protein virilizer homolog	Virma	18.0064	0.503461			#N/A	P13864	Dnmt1	DNA (cytosine-5)-methyltransferase 1	Dnmt1	19.4347	0.544032		+	#N/A	Q8R373	Clmp	CXADR-like membrane protein	Clmp	18.172	0.367399	+			C0HKE1;C0HKE2;C0HKE3;C0HKE4;C0HKE5;C0HKE6;C0HKE7;C0HKE8;C0HKE9;Q8BFU2;Q8CGP5;Q8CGP6;Q8CGP7	Hist1h2ab;Hist1h2ac;Hist1h2ad;Hist1h2ae;Hist1h2af;Hist1h2ag;Hist1h2ah;Hist1h2ai;Hist1h2ak;Hist1h2an;Hist1h2ao;Hist1h2ap;Hist3h2a	Histone H2A type 1-B	Hist1h2ab	29.8214	0.837383
A2AIX1	Sec16a	Protein transport protein sec16	Sec16a	18.868	0.182811			#N/A	P14733	Lmnb1	Lamin-B1	Lmnb1	23.7111	0.387655		+	#N/A	Q8R3E3	Wipi1	WD repeat domain phosphoinositide-interacting protein 1	Wipi1	18.958	0.814574	+			D3YU50	Mybpc1	Myosin-binding protein C, slow-type	Mybpc1	19.9036	0.999777
A2AJ76	Hmcn2	Hemicentin-2	Hmcn2	19.0989	0.123259			#N/A	P15105	Glul	Glutamine synthetase	Glul	21.6535	0.191361		+	#N/A	Q8R3U1	Pla2g16	HRAS-like suppressor 3	Pla2g16	19.4338	0.162171	+			D3YX43	Vsig10	V-set and immunoglobulin domain-containing protein 10	Vsig10	19.1029	0.90535
A2AJI0	Map7d1	MAP7 domain-containing protein 1	Map7d1	18.2613	0.847041			#N/A	P18654	Rps6ka3	Ribosomal protein S6 kinase alpha-3	Rps6ka3	20.7934	0.406921		+	#N/A	Q8R5A3	Apbb1ip	Amyloid beta A4 precursor protein-binding family B member 1-interacting protein	Apbb1ip	17.0295	0.559707	+			D3YXK2	Safb	Scaffold attachment factor B1	Safb	20.5684	0.291084
A2AKG8	Focad	Focadhesin	Focad	16.5985	0.840885			#N/A	P22437	Ptgs1	Prostaglandin G/H synthase 1	Ptgs1	20.8743	0.331693		+	#N/A	Q8R5F7	Ifih1	Interferon-induced helicase C domain-containing protein 1	Ifih1	19.4069	0.290352	+			D3YZP9	Ccdc6	Coiled-coil domain-containing protein 6	Ccdc6	19.3519	0.893833
A2ALK8	Ptpn3	Tyrosine-protein phosphatase non-receptor type 3	Ptpn3	18.1582	0.558253			#N/A	P23198	Cbx3	Chromobox protein homolog 3	Cbx3	21.2437	0.369972		+	#N/A	Q8VC88	Gca	Grancalcin	Gca	16.6637	0.600102	+			D3YZZ5	Tmed7	Transmembrane p24-trafficking protein 7	Tmed7	19.3703	1.10545
A2AMM0	Cavin4	Caveolae-associated protein 4	Cavin4	18.8311	0.406361			#N/A	P26039	Tln1	Talin-1	Tln1	24.084	0.273922		+	#N/A	Q8VD31	Tapbpl	Tapasin-related protein	Tapbpl	19.1458	0.238285	+			D3Z0M9	Ddx23	DEAD (Asp-Glu-Ala-Asp) box polypeptide 23	Ddx23	19.9227	0.494098
A2AN08	Ubr4	E3 ubiquitin-protein ligase UBR4	Ubr4	20.1805	0.275733			#N/A	P27784	Ccl6	C-C motif chemokine 6	Ccl6	21.1543	0.703011		+	#N/A	Q8VDC1	Fyco1	FYVE and coiled-coil domain-containing protein 1	Fyco1	17.9056	0.188244	+			D3Z286	Tmppe	Transmembrane protein with metallophosphoesterase domain	Tmppe	19.093	1.04416
A2ANX3	Atp8b4	Phospholipid-transporting ATPase	Atp8b4	19.9876	1.33438			#N/A	P28078	H2-DMa	Class II histocompatibility antigen, M alpha chain	H2-DMa	18.8465	0.057155		+	#N/A	Q8VDI1	Epsti1	Epithelial-stromal interaction protein 1	Epsti1	16.9767	0.693571	+			D3Z2H9	Tpm3-rs7	Uncharacterized protein	Tpm3-rs7	23.9412	1.23628
A2APY7	Ndufaf5	Arginine-hydroxylase NDUFAF5, mitochondrial	Ndufaf5	17.5713	0.505821			#N/A	P28271	Aco1	Cytoplasmic aconitate hydratase	Aco1	22.1831	0.166234		+	#N/A	Q8VDV8	Mitd1	MIT domain-containing protein 1	Mitd1	17.8919	0.601942	+			D3Z3L3	Trim12c	Tripartite motif-containing 12C	Trim12c	19.0251	0.245349
A2AQ19	Rtf1	RNA polymerase-associated protein RTF1 homolog	Rtf1	17.6868	0.28621			#N/A	P28658	Atxn10	Ataxin-10	Atxn10	18.0239	1.03		+	#N/A	Q8VI94	Oasl1	2'-5'-oligoadenylate synthase-like protein 1	Oasl1	18.8207	0.348232	+			D3Z3N4	Hnrnph3	Heterogeneous nuclear ribonucleoprotein H3	Hnrnph3	19.9584	1.46628
A2AQ25	Skt	Sickle tail protein	Skt	20.516	0.138374			#N/A	P29387	Gnb4	Guanine nucleotide-binding protein subunit beta-4	Gnb4	19.2647	0.541441		+	#N/A	Q91VC9	Ghitm	Growth hormone-inducible transmembrane protein	Ghitm	17.5851	0.736977	+			D3Z4S3	Ptrhd1	Putative peptidyl-tRNA hydrolase PTRHD1	Ptrhd1	19.5155	0.537921
A2AQ99	Duox2	Dual oxidase 2	Duox2	19.1796	0.0639806			#N/A	P35979	Rpl12	60S ribosomal protein L12	Rpl12	20.8454	0.567417		+	#N/A	Q91W36	Usp3	Ubiquitin carboxyl-terminal hydrolase 3	Usp3	20.2742	0.186911	+			D3Z6Q9	Bin2	Bridging integrator 2	Bin2	19.4327	1.06147
A2AR02	Ppig	Peptidyl-prolyl cis-trans isomerase G	Ppig	19.7071	0.337198			#N/A	P38060	Hmgcl	Hydroxymethylglutaryl-CoA lyase, mitochondrial	Hmgcl	20.5467	1.11667		+	#N/A	Q91XB0	Trex1	Three-prime repair exonuclease 1	Trex1	19.72	0.863727	+			D3Z7X0	Acad12	Acyl-Coenzyme A dehydrogenase family, member 12	Acad12	19.2311	0.778594
A2ARI4	Lgr4	Leucine-rich repeat-containing G-protein coupled receptor 4	Lgr4	17.6537	0.306087			#N/A	P40240	Cd9	CD9 antigen	Cd9	21.5889	0.584728		+	#N/A	Q91YT8	Tmem63a	CSC1-like protein 1	Tmem63a	19.6386	0.234664	+			D4AFX7	Dnajc13	DnaJ heat shock protein family (Hsp40) member C13	Dnajc13	19.8381	0.701931
A2ARJ3	Tmem236	Transmembrane protein 236	Tmem236	18.9665	0.0346405			#N/A	P45952	Acadm	Medium-chain specific acyl-CoA dehydrogenase, mitochondrial	Acadm	22.771	0.532846		+	#N/A	Q91Z40	Gbp7	Gbp6 protein	Gbp7	19.7167	0.420503	+			E0CZ22	Mroh1	Maestro heat-like repeat family member 1	Mroh1	16.7165	1.15203
A2ASS6	Ttn	Titin	Ttn	23.8653	1.39987			#N/A	P48678	Lmna	Prelamin-A/C	Lmna	26.2971	0.515457		+	#N/A	Q91ZR2	Snx18	Sorting nexin-18	Snx18	19.4787	0.550612	+			E9PUL3	Clca3b	Chloride channel accessory 3B	Clca3b	18.2203	1.24362
A2AT37	Upf2	UPF2 regulator of nonsense transcripts homolog (Yeast)	Upf2	17.5811	1.17967			#N/A	P49446	Ptpre	Receptor-type tyrosine-protein phosphatase epsilon	Ptpre	18.6872	1.02737		+	#N/A	Q91ZU6	Dst	Dystonin	Dst	18.6895	0.31857	+			E9PUR0	Ankhd1	Ankyrin repeat and KH domain-containing 1	Ankhd1	18.1229	1.22958
A2AUC9	Klhl41	Kelch-like protein 41	Klhl41	21.7938	1.23927			#N/A	P49586	Pcyt1a	Choline-phosphate cytidylyltransferase A	Pcyt1a	20.1221	0.540566		+	#N/A	Q921T2	Tor1aip1	Torsin-1A-interacting protein 1	Tor1aip1	20.4918	0.386558	+			E9PV24	Fga	Fibrinogen alpha chain	Fga	23.7546	1.10443
A2AWA9	Rabgap1	Rab GTPase-activating protein 1	Rabgap1	18.5843	0.558773			#N/A	P50580	Pa2g4	Proliferation-associated protein 2G4	Pa2g4	22.9191	0.291275		+	#N/A	Q925J9	Med1	Mediator of RNA polymerase II transcription subunit 1	Med1	16.1535	0.666372	+			E9PVA8	Gcn1	eIF-2-alpha kinase activator GCN1	Gcn1	20.6178	0.336165
A2AWP8	Arhgef10l	Rho guanine nucleotide exchange factor 10-like protein	Arhgef10l	18.2606	0.861233			#N/A	P51912	Slc1a5	Neutral amino acid transporter B(0)	Slc1a5	19.6233	0.203253		+	#N/A	Q99J10	Ctu1	Cytoplasmic tRNA 2-thiolation protein 1	Ctu1	20.7537	0.40719	+			E9PVX6	Mki67	Proliferation marker protein Ki-67	Mki67	19.1644	0.225347
A2AX52	Col6a4	Collagen alpha-4(VI) chain	Col6a4	20.1225	0.260067			#N/A	P53808	Pctp	Phosphatidylcholine transfer protein	Pctp	19.4565	0.46822		+	#N/A	Q99JF5	Mvd	Diphosphomevalonate decarboxylase	Mvd	18.8074	0.790145	+			E9PVZ8	Golgb1	Golgi autoantigen, golgin subfamily b, macrogolgin 1	Golgb1	19.8124	0.50031
A2BDX3	Mocs3	Adenylyltransferase and sulfurtransferase MOCS3	Mocs3	16.7696	1.0222			#N/A	P57759	Erp29	Endoplasmic reticulum resident protein 29	Erp29	19.9245	0.761355		+	#N/A	Q99KQ4	Nampt	Nicotinamide phosphoribosyltransferase	Nampt	21.5871	0.175172	+			E9PWG2	Trappc8	Trafficking protein particle complex 8	Trappc8	19.2812	0.831057
A2BH40	Arid1a	AT-rich interactive domain-containing protein 1A	Arid1a	18.4599	0.26921			#N/A	P59759	Mkl2	MKL/myocardin-like protein 2	Mkl2	19.3473	0.696726		+	#N/A	Q99L45	Eif2s2	Eukaryotic translation initiation factor 2 subunit 2	Eif2s2	21.4684	0.216495	+			E9PWQ3	Col6a3	Collagen, type VI, alpha 3	Col6a3	25.617	0.4923
A2RTL5	Rsrc2	Arginine/serine-rich coiled-coil protein 2	Rsrc2	18.9765	0.391755			#N/A	P62071	Rras2	Ras-related protein R-Ras2	Rras2	18.6372	1.71863		+	#N/A	Q99LL5	Pwp1	Periodic tryptophan protein 1 homolog	Pwp1	20.1845	0.286471	+			E9PX68	Slc4a1ap	Solute carrier family 4 (anion exchanger), member 1, adaptor protein	Slc4a1ap	18.0764	0.61509
A3KGB4	Tbc1d8b	TBC1 domain family member 8B	Tbc1d8b	18.5542	0.376814			#N/A	P62631	Eef1a2	Elongation factor 1-alpha 2	Eef1a2	21.0505	0.736637		+	#N/A	Q99M15	Pstpip2	Proline-serine-threonine phosphatase-interacting protein 2	Pstpip2	17.2571	0.899401	+			E9PX95	Abca17	ATP-binding cassette sub-family A member 17	Abca17	20.5982	0.748199
A3KGF9	Ccdc9b	Coiled-coil domain-containing protein 9B	Ccdc9b	18.4867	0.308642			#N/A	P63254	Crip1	Cysteine-rich protein 1	Crip1	26.1308	0.611991		+	#N/A	Q99M51	Nck1	Cytoplasmic protein NCK1	Nck1	19.4984	0.425886	+			E9PXF8	Sbf2	SET-binding factor 2	Sbf2	15.8087	0.211512
A3KGS3	Ralgapa2	Ral GTPase-activating protein subunit alpha-2	Ralgapa2	17.0672	0.643017			#N/A	P63328	Ppp3ca	Serine/threonine-protein phosphatase 2B catalytic subunit alpha isoform	Ppp3ca	20.7786	0.324784		+	#N/A	Q99MK8	Grk2	Beta-adrenergic receptor kinase 1	Grk2	19.5688	0.262888	+			E9PY16	Adap1	ArfGAP with dual PH domains 1	Adap1	16.9537	0.56101
A3KMP2	Ttc38	Tetratricopeptide repeat protein 38	Ttc38	21.3609	0.204043			#N/A	P68368	Tuba4a	Tubulin alpha-4A chain	Tuba4a	24.7185	0.870949		+	#N/A	Q99MU3	Adar	Double-stranded RNA-specific adenosine deaminase	Adar	18.3183	1.03038	+			E9PYB0	Ahnak2	AHNAK nucleoprotein 2 (Fragment)	Ahnak2	21.3144	0.509855
A6H584	Col6a5	Collagen alpha-5(VI) chain	Col6a5	19.2605	0.47212			#N/A	P70175	Dlg3	Disks large homolog 3	Dlg3	19.7621	0.457331		+	#N/A	Q99N57	Raf1	RAF proto-oncogene serine/threonine-protein kinase	Raf1	18.6169	0.405039	+			E9PYD1	Fam98c	Family with sequence similarity 98, member C	Fam98c	20.1658	0.690743
A6H5Y3	Mtr	Methionine synthase	Mtr	17.1256	0.220287			#N/A	P70271	Pdlim4	PDZ and LIM domain protein 4	Pdlim4	21.9884	0.662758		+	#N/A	Q99PG2	Ogfr	Opioid growth factor receptor	Ogfr	19.2231	0.41621	+			E9PYF4	Lmo7	LIM domain only 7	Lmo7	21.6319	0.630095
A6H5Z3	Exoc6b	Exocyst complex component 6B	Exoc6b	17.78	0.419811			#N/A	P81122	Irs2	Insulin receptor substrate 2	Irs2	17.651	1.55338		+	#N/A	Q9CQA9	Ntpcr	Cancer-related nucleoside-triphosphatase homolog	Ntpcr	16.0042	0.317089	+			E9PYK3	Parp4	Poly [ADP-ribose] polymerase	Parp4	19.5134	0.949436
A6H611	Mipep	Mitochondrial intermediate peptidase	Mipep	18.1362	0.131575			#N/A	P84091	Ap2m1	AP-2 complex subunit mu	Ap2m1	21.045	0.36557		+	#N/A	Q9CQJ6	Denr	Density-regulated protein	Denr	20.7152	0.31828	+			E9PZM7	Scaf11	SR-related CTD-associated factor 11	Scaf11	18.2083	0.582815
A6H619	Phrf1	PHD and RING finger domain-containing protein 1	Phrf1	16.6682	1.53714			#N/A	P97302	Bach1	Transcription regulator protein BACH1	Bach1	16.8986	0.372482		+	#N/A	Q9CQW9	Ifitm3	Interferon-induced transmembrane protein 3	Ifitm3	23.0401	0.543045	+			E9Q0B5	Fcgbp	Fc fragment of IgG-binding protein	Fcgbp	24.481	1.14002
A6H6A9	Rabgap1l	Rab GTPase-activating protein 1-like	Rabgap1l	19.0638	0.272485			#N/A	P97429	Anxa4	Annexin A4	Anxa4	23.5837	0.234124		+	#N/A	Q9CRY7	Gdpd1	Lysophospholipase D GDPD1	Gdpd1	20.0561	0.45857	+			E9Q0F0	Krt78	Keratin 78	Krt78	22.4527	0.616467
A6X935	Itih4	Inter alpha-trypsin inhibitor, heavy chain 4	Itih4	18.2616	0.601044			#N/A	P97449	Anpep	Aminopeptidase N	Anpep	20.9875	0.138729		+	#N/A	Q9CZD3	Gars	Glycine--tRNA ligase	Gars	22.1597	0.331647	+			E9Q137	Tex264	Testis-expressed gene 264	Tex264	20.952	1.32358
A6ZI47	Aldoart2	Fructose-bisphosphate aldolase	Aldoart2	20.631	1.45485			#N/A	P97499	Tep1	Telomerase protein component 1	Tep1	20.2333	0.56758		+	#N/A	Q9CZE3	Rab32	Ras-related protein Rab-32	Rab32	20.5461	0.530276	+			E9Q166	Atad2b	ATPase family, AAA domain-containing 2B	Atad2b	20.8037	2.16549
A8DUK4	Hbb-bs	Beta-globin	Hbb-bs	25.9858	0.521748			#N/A	P97742	Cpt1a	Carnitine O-palmitoyltransferase 1, liver isoform	Cpt1a	21.3924	0.490004		+	#N/A	Q9D0Q7	Mrpl45	39S ribosomal protein L45, mitochondrial	Mrpl45	19.9019	0.347338	+			E9Q1F5	Myo5c	Myosin VC	Myo5c	18.6268	0.554467
A9JSM3	Tmem238	Transmembrane protein 238	Tmem238	18.2567	0.455557			#N/A	P97855	G3bp1	Ras GTPase-activating protein-binding protein 1	G3bp1	22.5146	0.416393		+	#N/A	Q9D0R2	Tars	Threonine--tRNA ligase, cytoplasmic	Tars	22.1579	0.232839	+			E9Q1P8	Irf2bp2	Interferon regulatory factor 2-binding protein 2	Irf2bp2	20.5467	0.405387
B1AQ75	Krt36	Keratin, type I cuticular Ha6	Krt36	18.0484	1.29387			#N/A	Q00560	Il6st	Interleukin-6 receptor subunit beta	Il6st	17.8514	0.0986697		+	#N/A	Q9D1M4	Eef1e1	Eukaryotic translation elongation factor 1 epsilon-1	Eef1e1	19.1307	0.227763	+			E9Q1W3	Neb	Nebulin	Neb	20.0653	0.851289
B1AR13	Cisd3	CDGSH iron-sulfur domain-containing protein 3, mitochondrial	Cisd3	17.4493	0.622178			#N/A	Q02248	Ctnnb1	Catenin beta-1	Ctnnb1	21.7517	0.388762		+	#N/A	Q9D281	Fam114a1	Protein Noxp20	Fam114a1	19.6304	0.286219	+			E9Q394	Akap13	A-kinase anchor protein 13	Akap13	18.8811	0.427159
B1AR69	Myh13	Myosin, heavy polypeptide 13, skeletal muscle	Myh13	20.9297	1.84615			#N/A	Q08857	Cd36	Platelet glycoprotein 4	Cd36	19.1004	0.763305		+	#N/A	Q9D2Y4	Mlkl	Mixed lineage kinase domain-like protein	Mlkl	19.4309	0.577238	+			E9Q3G8	Nup153	Nucleoporin 153	Nup153	19.767	0.352413
B1ART2	Vps13d	Vacuolar protein sorting 13D	Vps13d	18.6266	0.0934292			#N/A	Q3TB82	Plekhf1	Pleckstrin homology domain-containing family F member 1	Plekhf1	17.5414	0.961916		+	#N/A	Q9D620	Rab11fip1	Rab11 family-interacting protein 1	Rab11fip1	17.7337	0.511469	+			E9Q3L2	Pi4ka	Phosphatidylinositol 4-kinase alpha	Pi4ka	19.7342	0.267983
B1AUN2	Eif2b3	Eukaryotic translation initiation factor 2B, subunit 3	Eif2b3	19.3101	0.286218			#N/A	Q3TEA8	Hp1bp3	Heterochromatin protein 1-binding protein 3	Hp1bp3	21.5347	0.334282		+	#N/A	Q9D820	Prorsd1	Prolyl-tRNA synthetase associated domain-containing protein 1	Prorsd1	20.2229	0.163592	+			E9Q409	Prss32	Protease, serine 32	Prss32	20.7268	1.1042
B1AVH7	Tbc1d2	TBC1 domain family member 2A	Tbc1d2	19.2277	0.134716			#N/A	Q3TIU4	Pde12	2',5'-phosphodiesterase 12	Pde12	19.4677	2.01508		+	#N/A	Q9D832	Dnajb4	DnaJ homolog subfamily B member 4	Dnajb4	19.8651	0.365248	+			E9Q411	Nbas	Neuroblastoma-amplified sequence	Nbas	18.3137	0.416435
B1AVK5	Col4a6	Collagen, type IV, alpha 6	Col4a6	18.0635	0.154358			#N/A	Q3TWW8	Srsf6	Serine/arginine-rich splicing factor 6	Srsf6	24.4627	0.561758		+	#N/A	Q9D8C4	Ifi35	Interferon-induced 35 kDa protein homolog	Ifi35	20.2681	0.299839	+			E9Q414	Apob	Apolipoprotein B-100	Apob	20.1669	1.87297
B1AY13	Usp24	Ubiquitin carboxyl-terminal hydrolase 24	Usp24	18.826	0.611133			#N/A	Q3UHC7	Dab2ip	Disabled homolog 2-interacting protein	Dab2ip	19.3389	0.758984		+	#N/A	Q9DAM7	Tmem263	Transmembrane protein 263	Tmem263	18.1038	0.311497	+			E9Q4N7	Arid1b	AT-rich interactive domain-containing protein 1B	Arid1b	18.0741	1.25857
B1AYL1	Scn7a	Sodium channel protein	Scn7a	19.5344	0.49999			#N/A	Q3UV70	Pdp1	[Pyruvate dehydrogenase [acetyl-transferring]]-phosphatase 1, mitochondrial	Pdp1	19.1892	0.5154		+	#N/A	Q9DBK7	Uba7	MCG18845, isoform CRA_d	Uba7	20.0882	0.392423	+			E9Q512	Trip11	Thyroid hormone receptor interactor 11	Trip11	18.4102	0.926986
B1AZA5	Tmem245	Transmembrane protein 245	Tmem245	19.0749	0.332641			#N/A	Q3V3Q7	Pacs2	Phosphofurin acidic cluster sorting protein 2	Pacs2	15.8754	1.9666		+	#N/A	Q9DBR3	Armc8	Armadillo repeat-containing protein 8	Armc8	19.4651	0.123487	+			E9Q555	Rnf213	E3 ubiquitin-protein ligase RNF213	Rnf213	19.9014	0.525905
B1AZI6	Thoc2	THO complex subunit 2	Thoc2	18.6392	0.494909			#N/A	Q3V3R4	Itga1	Integrin alpha-1	Itga1	22.7091	0.415521		+	#N/A	Q9DBS9	Osbpl3	Oxysterol-binding protein-related protein 3	Osbpl3	17.9611	0.648438	+			E9Q557	Dsp	Desmoplakin	Dsp	23.289	0.533609
B2RQG2	Phf3	PHD finger protein 3	Phf3	17.924	0.231417			#N/A	Q5M8N0	Cnrip1	CB1 cannabinoid receptor-interacting protein 1	Cnrip1	16.9077	0.864631		+	#N/A	Q9DBX3	Susd2	Sushi domain-containing protein 2	Susd2	22.2539	0.174627	+			E9Q5K9	Ythdc1	YTH domain-containing protein 1	Ythdc1	18.6621	0.471494
B2RR83	Ythdc2	3'-5' RNA helicase YTHDC2	Ythdc2	17.5638	0.754322			#N/A	Q5SWD9	Tsr1	Pre-rRNA-processing protein TSR1 homolog	Tsr1	17.6293	0.529694		+	#N/A	Q9DCE9	Igtp	Interferon gamma-induced GTPase	Igtp	20.0768	0.490915	+			E9Q634	Myo1e	Unconventional myosin-Ie	Myo1e	20.0227	0.412908
B2RRE7	Otud4	OTU domain-containing protein 4	Otud4	18.6469	0.119859			#N/A	Q5SYD0	Myo1d	Unconventional myosin-Id	Myo1d	23.1413	0.162076		+	#N/A	Q9ERD6	Ralgps2	Ras-specific guanine nucleotide-releasing factor RalGPS2	Ralgps2	18.0948	0.242274	+			E9Q6H8	Plekha5	Pleckstrin homology domain-containing, family A member 5	Plekha5	19.2389	0.651083
B2RSH2	Gnai1	Guanine nucleotide-binding protein G(i) subunit alpha-1	Gnai1	19.2001	0.346152			#N/A	Q60598	Cttn	Src substrate cortactin	Cttn	22.617	0.47099		+	#N/A	Q9ERI2	Rab27a	Ras-related protein Rab-27A	Rab27a	20.3231	0.188223	+			E9Q6J5	Bod1l	Biorientation of chromosomes in cell division protein 1-like 1	Bod1l	18.6246	0.590879
B2RUR4	Kprp	Keratinocyte proline-rich protein	Kprp	18.857	0.733417			#N/A	Q60664	Lrmp	Lymphoid-restricted membrane protein	Lrmp	18.4546	0.408773		+	#N/A	Q9ET26	Rnf114	E3 ubiquitin-protein ligase RNF114	Rnf114	20.4132	0.319294	+			E9Q6R7	Utrn	Utrophin	Utrn	20.3157	0.528093
B2RUR8	Otud7b	OTU domain-containing protein 7B	Otud7b	18.7076	0.301061			#N/A	Q60790	Rasa3	Ras GTPase-activating protein 3	Rasa3	17.9805	0.631129		+	#N/A	Q9JHK5	Plek	Pleckstrin	Plek	17.7167	0.436284	+			E9Q735	Ube4a	Ubiquitin conjugation factor E4 A	Ube4a	18.7676	0.464406
B2RW88	Prr19	Proline-rich 19	Prr19	19.6381	0.363415			#N/A	Q60994	Adipoq	Adiponectin	Adipoq	21.6931	0.447665		+	#N/A	Q9JHQ5	Lztfl1	Leucine zipper transcription factor-like protein 1	Lztfl1	18.022	0.806438	+			E9Q784	Zc3h13	Zinc finger CCCH domain-containing protein 13	Zc3h13	18.6242	0.859415
B2RX12	Abcc3	Canalicular multispecific organic anion transporter 2	Abcc3	19.8863	0.327819			#N/A	Q60996	Ppp2r5c	Serine/threonine-protein phosphatase 2A 56 kDa regulatory subunit gamma isoform	Ppp2r5c	18.4474	1.11914		+	#N/A	Q9JI90	Rnf14	E3 ubiquitin-protein ligase RNF14	Rnf14	18.5971	0.473322	+			E9Q7D5	Arhgef5	Rho guanine nucleotide exchange factor 5	Arhgef5	18.8411	0.161498
B2RXC1	Trappc11	Trafficking protein particle complex subunit 11	Trappc11	18.2052	0.455044			#N/A	Q61176	Arg1	Arginase-1	Arg1	18.794	0.515337		+	#N/A	Q9JIB4	Gtf2h2	General transcription factor IIH subunit 2	Gtf2h2	18.0107	0.498288	+			E9Q7E2	Arid2	AT-rich interactive domain-containing protein 2	Arid2	17.02	0.270308
B2RXC2	Itpkb	Kinase	Itpkb	18.7741	0.299304			#N/A	Q61193	Rgl2	Ral guanine nucleotide dissociation stimulator-like 2	Rgl2	15.933	0.862398		+	#N/A	Q9JIK5	Ddx21	Nucleolar RNA helicase 2	Ddx21	22.0197	0.276576	+			E9Q7M2	Tsc22d2	TSC22 domain family, member 2	Tsc22d2	17.296	0.989588
B2RXQ2	Ppfia1	Ppfia1 protein	Ppfia1	18.5719	0.200939			#N/A	Q61263	Soat1	Sterol O-acyltransferase 1	Soat1	17.5486	1.68847		+	#N/A	Q9JIY5	Htra2	Serine protease HTRA2, mitochondrial	Htra2	19.0471	0.770052	+			E9Q7P9	Cdhr2	Cadherin-related family member 2	Cdhr2	20.2198	1.39895
B2RXR6	Ankrd44	Serine/threonine-protein phosphatase 6 regulatory ankyrin repeat subunit B	Ankrd44	17.4425	0.710066			#N/A	Q61425	Hadh	Hydroxyacyl-coenzyme A dehydrogenase, mitochondrial	Hadh	23.6879	0.701441		+	#N/A	Q9JJ89	Ccdc86	Coiled-coil domain-containing protein 86	Ccdc86	17.7149	0.72554	+			E9Q8I7	Nfxl1	Nuclear transcription factor, X-box-binding-like 1	Nfxl1	18.562	1.39104
B2RXS4	Plxnb2	Plexin-B2	Plxnb2	21.3993	0.157805			#N/A	Q61753	Phgdh	D-3-phosphoglycerate dehydrogenase	Phgdh	21.0263	0.548833		+	#N/A	Q9JJF9	Sppl2a	Signal peptide peptidase-like 2A	Sppl2a	19.5627	0.466256	+			E9Q8T7	Dnah1	Dynein heavy chain 1, axonemal	Dnah1	21.4416	0.811514
B2RY04	Dock5	Dedicator of cytokinesis protein 5	Dock5	16.7327	0.279262			#N/A	Q61823	Pdcd4	Programmed cell death protein 4	Pdcd4	21.428	0.347697		+	#N/A	Q9JJT0	Rcl1	RNA 3'-terminal phosphate cyclase-like protein	Rcl1	18.2055	0.381375	+			E9Q912	Rap1gds1	RAP1, GTP-GDP dissociation stimulator 1	Rap1gds1	19.7882	0.905099
B2RY56	Rbm25	RNA-binding protein 25	Rbm25	20.67	0.3808			#N/A	Q61830	Mrc1	Macrophage mannose receptor 1	Mrc1	20.0604	0.328152		+	#N/A	Q9JL16	Isg20	Interferon-stimulated gene 20 kDa protein	Isg20	18.1596	0.798057	+			E9QA15	Cald1	Caldesmon 1	Cald1	25.2992	0.619288
B5THE2	Mgam	Maltase-glucoamylase	Mgam	19.7001	0.627994			#N/A	Q62165	Dag1	Dystroglycan	Dag1	22.1888	0.44696		+	#N/A	Q9JL56	Gde1	Glycerophosphodiester phosphodiesterase 1	Gde1	17.1961	0.592185	+			E9QAB6	Ptar1	Protein prenyltransferase alpha subunit repeat-containing 1	Ptar1	18.7894	0.67693
B5X0E4	Abcb5	ATP-binding cassette sub-family B member 5	Abcb5	18.9303	0.646324			#N/A	Q62179	Sema4b	Semaphorin-4B	Sema4b	19.4181	0.795223		+	#N/A	Q9JM13	Rabgef1	Rab5 GDP/GTP exchange factor	Rabgef1	19.0221	0.656479	+			E9QAE3	Btaf1	B-TFIID TATA-box-binding protein-associated factor 1	Btaf1	17.871	0.484662
B7ZMP1	Xpnpep3	Xaa-Pro aminopeptidase 3	Xpnpep3	17.4188	0.515381			#N/A	Q62351	Tfrc	Transferrin receptor protein 1	Tfrc	19.6615	0.514393		+	#N/A	Q9JM51	Ptges	Prostaglandin E synthase	Ptges	20.5283	0.887143	+			F2Z3U3	Raph1	Ras association (RalGDS/AF-6) and pleckstrin homology domains 1	Raph1	24.0792	1.35496
B8ZXI1	Qtrt2	Queuine tRNA-ribosyltransferase accessory subunit 2	Qtrt2	17.7726	0.570329			#N/A	Q62465	Vat1	Synaptic vesicle membrane protein VAT-1 homolog	Vat1	21.4585	0.68832		+	#N/A	Q9JMH6	Txnrd1	Thioredoxin reductase 1, cytoplasmic	Txnrd1	22.5475	0.242276	+			F6ZDS4	Tpr	Nucleoprotein TPR	Tpr	20.8669	0.439475
B9EJ80	Pdzd8	PDZ domain-containing protein 8	Pdzd8	18.1923	0.619255			#N/A	Q64685	St6gal1	Beta-galactoside alpha-2,6-sialyltransferase 1	St6gal1	17.489	0.620725		+	#N/A	Q9QUH0	Glrx	Glutaredoxin-1	Glrx	19.3905	0.757569	+			F7BJK1	Pcdh1	Protocadherin 1 (Fragment)	Pcdh1	18.2598	1.21313
B9EJ86	Osbpl8	Oxysterol-binding protein-related protein 8	Osbpl8	18.7362	0.226872			#N/A	Q64727	Vcl	Vinculin	Vcl	24.9113	0.389527		+	#N/A	Q9QUK4	Naip2	Baculoviral IAP repeat-containing protein 1b	Naip2	16.8132	0.275242	+			F8VPK0	Ttc37	Tetratricopeptide repeat domain 37	Ttc37	19.335	0.320454
B9EJR8	Dnaaf5	Dynein assembly factor 5, axonemal	Dnaaf5	18.1016	0.735905			#N/A	Q6DFW4	Nop58	Nucleolar protein 58	Nop58	18.8777	0.756754		+	#N/A	Q9QUN7	Tlr2	Toll-like receptor 2	Tlr2	18.3512	0.300405	+			F8VPN4	Agl	Amylo-1,6-glucosidase, 4-alpha-glucanotransferase	Agl	21.0398	0.8613
B9EKI3	Tmf1	TATA element modulatory factor	Tmf1	18.5783	0.283871			#N/A	Q6NT99	Dusp23	Dual specificity protein phosphatase 23	Dusp23	18.9177	0.42783		+	#N/A	Q9QY24	Zbp1	Z-DNA-binding protein 1	Zbp1	19.063	0.582836	+			F8VPP8	Zc3h7b	Zinc finger CCCH type-containing 7B	Zc3h7b	18.1008	1.95477
C0HKD8;C0HKD9	Mfap1a;Mfap1b	Microfibrillar-associated protein 1A	Mfap1a	18.8274	0.286955			#N/A	Q6P9S7	Galnt10	Polypeptide N-acetylgalactosaminyltransferase 10	Galnt10	19.2072	0.728843		+	#N/A	Q9QYF1	Rdh11	Retinol dehydrogenase 11	Rdh11	19.1069	0.603647	+			F8VPU2	Farp1	FERM, ARHGEF and pleckstrin domain-containing protein 1	Farp1	18.5648	0.566291
C0HKE1;C0HKE2;C0HKE3;C0HKE4;C0HKE5;C0HKE6;C0HKE7;C0HKE8;C0HKE9;Q8BFU2;Q8CGP5;Q8CGP6;Q8CGP7	Hist1h2ab;Hist1h2ac;Hist1h2ad;Hist1h2ae;Hist1h2af;Hist1h2ag;Hist1h2ah;Hist1h2ai;Hist1h2ak;Hist1h2an;Hist1h2ao;Hist1h2ap;Hist3h2a	Histone H2A type 1-B	Hist1h2ab	29.3195	0.341614			#N/A	Q6PDY2	Ado	2-aminoethanethiol dioxygenase	Ado	19.6823	0.578549		+	#N/A	Q9QYI5	Dnajb2	DnaJ homolog subfamily B member 2	Dnajb2	18.642	0.399884	+			F8VQ05	Fryl	FRY-like transcription coactivator	Fryl	18.2314	0.693332
D3YU50	Mybpc1	Myosin-binding protein C, slow-type	Mybpc1	23.1586	1.50484			#N/A	Q6PGB6	Naa50	N-alpha-acetyltransferase 50	Naa50	20.2779	0.521052		+	#N/A	Q9QZ85	Iigp1	Interferon-inducible GTPase 1	Iigp1	20.3929	0.668404	+			F8VQC1	Srp72	Signal recognition particle subunit SRP72	Srp72	19.8145	0.383155
D3YX43	Vsig10	V-set and immunoglobulin domain-containing protein 10	Vsig10	20.2991	0.447044			#N/A	Q7SIG6	Asap2	Arf-GAP with SH3 domain, ANK repeat and PH domain-containing protein 2	Asap2	26.9837	0.560314		+	#N/A	Q9QZD8	Slc25a10	Mitochondrial dicarboxylate carrier	Slc25a10	20.0337	0.448918	+			G3UW81	Cyp4f40	Cytochrome P450, family 4, subfamily f, polypeptide 40	Cyp4f40	18.9322	0.410751
D3YXJ5	Fam84b	Family with sequence similarity 84, member B	Fam84b	18.3313	0.274388			#N/A	Q7TN05	Ap1s3	AP-1 complex subunit sigma-3	Ap1s3	18.5066	0.619779		+	#N/A	Q9R118	Htra1	Serine protease HTRA1	Htra1	17.5163	1.5288	+			G3UW82	Myh2	MCG140437, isoform CRA_d	Myh2	22.5743	1.15832
D3YXK2	Safb	Scaffold attachment factor B1	Safb	19.9722	0.303409			#N/A	Q7TN29	Smap2	Stromal membrane-associated protein 2	Smap2	19.0768	1.00986		+	#N/A	Q9R233	Tapbp	Tapasin	Tapbp	21.7459	0.474668	+			G3X8U3	2210016F16Rik	Queuosine salvage protein	2210016F16Rik	21.7213	0.471914
D3YZP9	Ccdc6	Coiled-coil domain-containing protein 6	Ccdc6	19.7818	0.577002			#N/A	Q7TSJ2	Map6	Microtubule-associated protein 6	Map6	19.377	0.593407		+	#N/A	Q9WTK0	Nupr1	Nuclear protein 1	Nupr1	15.8507	0.659182	+			G3X8X0	Dhx16	DEAH (Asp-Glu-Ala-His) box polypeptide 16	Dhx16	18.3503	0.256589
D3YZZ5	Tmed7	Transmembrane p24-trafficking protein 7	Tmed7	19.5077	1.14087			#N/A	Q80UK0	Sestd1	SEC14 domain and spectrin repeat-containing protein 1	Sestd1	18.0207	0.768935		+	#N/A	Q9WTK5	Nfkb2	Nuclear factor NF-kappa-B p100 subunit	Nfkb2	19.8311	0.371649	+			G3X972	Sec24c	SEC24 related gene family, member C (S. cerevisiae), isoform CRA_a	Sec24c	21.4261	0.617276
D3Z0M9	Ddx23	DEAD (Asp-Glu-Ala-Asp) box polypeptide 23	Ddx23	19.601	0.72348			#N/A	Q80UP3	Dgkz	Diacylglycerol kinase zeta	Dgkz	18.2487	0.83837		+	#N/A	Q9WV86	Katna1	Katanin p60 ATPase-containing subunit A1	Katna1	17.7421	0.766462	+			G3X982	Aox3	Aldehyde oxidase 3	Aox3	21.0961	0.934694
D3Z286	Tmppe	Transmembrane protein with metallophosphoesterase domain	Tmppe	19.4553	0.985224			#N/A	Q80UW8	Polr2e	DNA-directed RNA polymerases I, II, and III subunit RPABC1	Polr2e	19.9736	0.220863		+	#N/A	Q9WV92	Epb41l3	Band 4.1-like protein 3	Epb41l3	19.0893	0.659063	+			G3X9B1	Heatr1	HEAT repeat-containing 1	Heatr1	17.9379	1.2571
D3Z2H9	Tpm3-rs7	Uncharacterized protein	Tpm3-rs7	24.1726	0.288699			#N/A	Q80YQ8	Rmnd5a	E3 ubiquitin-protein ligase RMND5A	Rmnd5a	18.7194	0.976447		+	#N/A	Q9WVB0	Rbpms	RNA-binding protein with multiple splicing	Rbpms	21.2125	0.257688	+			G3X9C2	Nccrp1	F-box only protein 50	Nccrp1	19.8181	1.50279
D3Z3L3	Trim12c	Tripartite motif-containing 12C	Trim12c	18.9511	0.430197			#N/A	Q810D6	Grwd1	Glutamate-rich WD repeat-containing protein 1	Grwd1	17.8405	1.09688		+	#N/A	Q9WVK4	Ehd1	EH domain-containing protein 1	Ehd1	22.3635	0.15925	+			G3X9K3	Arfgef1	Brefeldin A-inhibited guanine nucleotide-exchange protein 1	Arfgef1	20.1166	0.497502
D3Z3N4	Hnrnph3	Heterogeneous nuclear ribonucleoprotein H3	Hnrnph3	20.3187	1.06016			#N/A	Q8BH95	Echs1	Enoyl-CoA hydratase, mitochondrial	Echs1	22.7313	0.681026		+	#N/A	Q9WVL2	Stat2	Signal transducer and activator of transcription 2	Stat2	18.7409	0.502923	+			G3X9V8	Serpinb3a	MCG129038	Serpinb3a	21.3728	0.937559
D3Z4S3	Ptrhd1	Putative peptidyl-tRNA hydrolase PTRHD1	Ptrhd1	19.3766	0.673527			#N/A	Q8BHD8	Pcmtd2	Protein-L-isoaspartate O-methyltransferase domain-containing protein 2	Pcmtd2	16.8921	1.07473		+	#N/A	Q9Z0E6	Gbp2	Guanylate-binding protein 2	Gbp2	20.0981	0.652186	+			G3X9Y6	Akr1c19	Aldo-keto reductase family 1, member C19	Akr1c19	22.1022	0.967783
D3Z6Q9	Bin2	Bridging integrator 2	Bin2	17.8734	0.653226			#N/A	Q8BMK4	Ckap4	Cytoskeleton-associated protein 4	Ckap4	21.4588	0.192866		+	#N/A	Q9Z0H7	Bcl10	B-cell lymphoma/leukemia 10	Bcl10	15.4387	1.40414	+			G3X9Z4	Pcf11	Cleavage and polyadenylation factor subunit homolog (S. cerevisiae)	Pcf11	18.5677	0.0383876
D3Z7X0	Acad12	Acyl-Coenzyme A dehydrogenase family, member 12	Acad12	20.146	1.0283			#N/A	Q8BVI4	Qdpr	Dihydropteridine reductase	Qdpr	21.3043	0.81545		+	#N/A	Q9Z2B9	Rps6ka4	Ribosomal protein S6 kinase alpha-4	Rps6ka4	19.0755	0.441494	+			G5E829	Atp2b1	Plasma membrane calcium-transporting ATPase 1	Atp2b1	21.0939	0.475057
D4AFX7	Dnajc13	DnaJ heat shock protein family (Hsp40) member C13	Dnajc13	19.7638	0.224223			#N/A	Q8C0D4	Arhgap12	Rho GTPase-activating protein 12	Arhgap12	17.5529	1.20334		+	#N/A	Q9Z2X2	Psmd10	26S proteasome non-ATPase regulatory subunit 10	Psmd10	17.749	0.379913	+			G5E870	Trip12	E3 ubiquitin-protein ligase TRIP12	Trip12	19.3892	0.278222
E0CZ22	Mroh1	Maestro heat-like repeat family member 1	Mroh1	16.3363	0.960861			#N/A	Q8C6B0	Mettl7a1	MCG20149, isoform CRA_a	Mettl7a1	21.7453	0.947819		+	#N/A	A0A0A6YY83	Pcdh7	Protocadherin 7	Pcdh7	18.9174	0.53399		+		G5E895	Akr1b10	Aldo-keto reductase family 1, member B10 (aldose reductase)	Akr1b10	20.4764	0.57779
E0CZ42	Fer1l6	Fer-1-like 6 (C. elegans)	Fer1l6	16.8131	0.240454			#N/A	Q8C6G8	Wdr26	WD repeat-containing protein 26	Wdr26	19.092	0.654991		+	#N/A	A1L3P4	Slc9a6	Sodium/hydrogen exchanger	Slc9a6	16.7637	0.637449		+		G5E897	Kdelc2	KDEL (Lys-Asp-Glu-Leu) containing 2, isoform CRA_b	Kdelc2	19.1038	0.389052
E2JF22	Piezo1	Piezo-type mechanosensitive ion channel component 1	Piezo1	15.8883	0.608725			#N/A	Q8C7K6	Pcyox1l	Prenylcysteine oxidase-like	Pcyox1l	17.3105	0.641906		+	#N/A	A2A8Z1	Osbpl9	Oxysterol-binding protein-related protein 9	Osbpl9	18.8367	1.28194		+		G5E8K5	Ank3	Ankyrin-3	Ank3	19.4705	0.370345
E9PUL3	Clca3b	Chloride channel accessory 3B	Clca3b	16.273	1.29426			#N/A	Q8CHP8	Pgp	Glycerol-3-phosphate phosphatase	Pgp	21.9488	0.515361		+	#N/A	A2AJ88	Pnpla7	Patatin-like phospholipase domain-containing protein 7	Pnpla7	19.1136	0.179299		+		G5E8V9	Arfip1	ADP-ribosylation factor-interacting protein 1	Arfip1	21.4522	0.461145
E9PUR0	Ankhd1	Ankyrin repeat and KH domain-containing 1	Ankhd1	18.7082	0.378156			#N/A	Q8CHY6	Gatad2a	Transcriptional repressor p66 alpha	Gatad2a	18.7628	0.458411		+	#N/A	A6H8H2	Dennd4c	DENN domain-containing protein 4C	Dennd4c	20.1941	0.132922		+		H3BKP8	9930021J03Rik	RIKEN cDNA 9930021J03 gene	9930021J03Rik	20.7551	0.386622
E9PV24	Fga	Fibrinogen alpha chain	Fga	21.8937	0.51729			#N/A	Q8CIZ8	Vwf	von Willebrand factor	Vwf	19.091	0.576627		+	#N/A	B1AZP2	Dlgap4	Disks large-associated protein 4	Dlgap4	18.5079	0.337783		+		I7HPW8	Myo15b	Myosin XVB	Myo15b	20.7737	1.37406
E9PV38	Ces2g	Carboxylic ester hydrolase	Ces2g	19.2409	0.188237			#N/A	Q8K0J2	B3gnt7	UDP-GlcNAc:betaGal beta-1,3-N-acetylglucosaminyltransferase 7	B3gnt7	19.2787	0.543608		+	#N/A	B2RQC6	Cad	CAD protein	Cad	21.0092	0.115612		+		J3QN89	Aamp	Angio-associated migratory protein	Aamp	18.6274	0.372088
E9PVA8	Gcn1	eIF-2-alpha kinase activator GCN1	Gcn1	20.6125	0.365877			#N/A	Q8K0Q5	Arhgap18	Rho GTPase-activating protein 18	Arhgap18	17.8348	0.275281		+	#N/A	D3Z7P3	Gls	Glutaminase kidney isoform, mitochondrial	Gls	19.9064	0.228186		+		O08529	Capn2	Calpain-2 catalytic subunit	Capn2	22.1961	0.451234
E9PVG8	9530053A07Rik	RIKEN cDNA 9530053A07 gene	9530053A07Rik	19.82	1.30822			#N/A	Q8K157	Galm	Aldose 1-epimerase	Galm	20.5441	0.61933		+	#N/A	E9PWR4	Dip2c	Disco-interacting protein 2 homolog C	Dip2c	18.7051	0.278889		+		O08532	Cacna2d1	Voltage-dependent calcium channel subunit alpha-2/delta-1	Cacna2d1	21.3159	0.510012
E9PVX6	Mki67	Proliferation marker protein Ki-67	Mki67	18.6818	0.6417			#N/A	Q8K353	Cystm1	Cysteine-rich and transmembrane domain-containing protein 1	Cystm1	19.43	1.83075		+	#N/A	E9PYG6	Rasa1	RAS p21 protein activator 1	Rasa1	18.1513	0.338491		+		O08539	Bin1	Myc box-dependent-interacting protein 1	Bin1	21.5227	0.50604
E9PVZ8	Golgb1	Golgi autoantigen, golgin subfamily b, macrogolgin 1	Golgb1	19.844	0.189342			#N/A	Q8K354	Cbr3	Carbonyl reductase [NADPH] 3	Cbr3	22.5019	0.3572		+	#N/A	E9PZQ0	Ryr1	Ryanodine receptor 1	Ryr1	20.0009	0.854573		+		O08547	Sec22b	Vesicle-trafficking protein SEC22b	Sec22b	21.2387	1.01397
E9PWG2	Trappc8	Trafficking protein particle complex 8	Trappc8	19.1932	0.834216			#N/A	Q8K3G9	Appl2	DCC-interacting protein 13-beta	Appl2	19.7715	0.555686		+	#N/A	E9Q0S6	Tns1	Tensin 1	Tns1	22.8864	0.515142		+		O08553	Dpysl2	Dihydropyrimidinase-related protein 2	Dpysl2	23.7239	0.35028
E9PWP7	Muc3	Mucin 3, intestinal	Muc3	19.0483	0.686724			#N/A	Q8QZY6	Tspan14	Tetraspanin-14	Tspan14	15.8087	1.72828		+	#N/A	E9Q5C9	Nolc1	Nucleolar and coiled-body phosphoprotein 1	Nolc1	20.1174	0.308619		+		O08573	Lgals9	Galectin-9	Lgals9	21.7639	0.432667
E9PWQ3	Col6a3	Collagen, type VI, alpha 3	Col6a3	26.1034	0.219513			#N/A	Q8R1F1	Fam129b	Niban-like protein 1	Fam129b	20.9927	0.420488		+	#N/A	E9Q616	Ahnak	AHNAK nucleoprotein (desmoyokin)	Ahnak	24.4259	0.191736		+		O08579	Emd	Emerin	Emd	20.0832	0.757929
E9PWZ3	Rpl3l	Ribosomal protein L3-like	Rpl3l	18.3825	0.581325			#N/A	Q8R361	Rab11fip5	Rab11 family-interacting protein 5	Rab11fip5	19.1006	0.291111		+	#N/A	E9QAS7	Inpp5a	Inositol polyphosphate-5-phosphatase A	Inpp5a	19.0052	0.608775		+		O08582	Gtpbp1	GTP-binding protein 1	Gtpbp1	18.527	0.31173
E9PX68	Slc4a1ap	Solute carrier family 4 (anion exchanger), member 1, adaptor protein	Slc4a1ap	18.2056	0.71645			#N/A	Q8R3T5	Stxbp6	Syntaxin-binding protein 6	Stxbp6	19.8598	1.28127		+	#N/A	O08583	Alyref	THO complex subunit 4	Alyref	21.7868	0.547633		+		O08585	Clta	Clathrin light chain A	Clta	23.1575	0.920896
E9PX95	Abca17	ATP-binding cassette sub-family A member 17	Abca17	20.582	0.58401			#N/A	Q8R570	Snap47	Synaptosomal-associated protein 47	Snap47	17.7446	0.954516		+	#N/A	O08738	Casp6	Caspase-6	Casp6	19.0716	0.330291		+		O08586	Pten	Phosphatidylinositol 3,4,5-trisphosphate 3-phosphatase and dual-specificity protein phosphatase PTEN	Pten	19.687	1.05605
E9PY03	Tstd1	Thiosulfate sulfurtransferase (rhodanese)-like domain-containing 1	Tstd1	20.7435	0.526274			#N/A	Q8VCG1	Dut	Deoxyuridine triphosphatase	Dut	21.3102	1.31995		+	#N/A	O35566	Cd151	CD151 antigen	Cd151	20.6963	0.468653		+		O08599	Stxbp1	Syntaxin-binding protein 1	Stxbp1	20.4013	0.512834
E9PY16	Adap1	ArfGAP with dual PH domains 1	Adap1	17.8259	0.10235			#N/A	Q8VCI0	Plbd1	Phospholipase B-like 1	Plbd1	19.6703	0.758525		+	#N/A	O35678	Mgll	Monoglyceride lipase	Mgll	22.1031	0.760561		+		O08600	Endog	Endonuclease G, mitochondrial	Endog	19.5547	1.07071
E9PYB0	Ahnak2	AHNAK nucleoprotein 2 (Fragment)	Ahnak2	22.3664	0.422412			#N/A	Q8VD66	Abhd4	Protein ABHD4	Abhd4	18.9631	2.01361		+	#N/A	O35744	Chil3	Chitinase-like protein 3	Chil3	22.0999	1.12426		+		O08638	Myh11	Myosin-11	Myh11	27.3926	0.535318
E9PYD1	Fam98c	Family with sequence similarity 98, member C	Fam98c	20.3583	0.443363			#N/A	Q8VD75	Hip1	Huntingtin-interacting protein 1	Hip1	17.6233	0.678552		+	#N/A	O54890	Itgb3	Integrin beta-3	Itgb3	19.8946	0.423412		+		O08644	Ephb6	Ephrin type-B receptor 6	Ephb6	21.3028	1.33004
E9PYF4	Lmo7	LIM domain only 7	Lmo7	21.6646	0.417326			#N/A	Q8VDN2	Atp1a1	Sodium/potassium-transporting ATPase subunit alpha-1	Atp1a1	25.6111	0.126084		+	#N/A	O70145	Ncf2	Neutrophil cytosol factor 2	Ncf2	20.0715	0.467588		+		O08663	Metap2	Methionine aminopeptidase 2	Metap2	21.7562	0.756042
E9PYF7	Ap1ar	AP1AR	Ap1ar	17.4748	0.435074			#N/A	Q8VDP3	Mical1	[F-actin]-monooxygenase MICAL1	Mical1	20.7192	0.430325		+	#N/A	O70161	Pip5k1c	Phosphatidylinositol 4-phosphate 5-kinase type-1 gamma	Pip5k1c	22.4679	0.252357		+		O08664	Bcl7c	B-cell CLL/lymphoma 7 protein family member C	Bcl7c	20.1793	0.722696
E9PYH6	Setd1a	SET domain-containing 1A	Setd1a	16.1267	1.18813			#N/A	Q8VEG6	Cnot6l	CCR4-NOT transcription complex subunit 6-like	Cnot6l	18.2994	0.166951		+	#N/A	O70309	Itgb5	Integrin beta-5	Itgb5	19.1109	0.710959		+		O08677	Kng1	Kininogen-1	Kng1	20.6751	1.18843
E9PYK3	Parp4	Poly [ADP-ribose] polymerase	Parp4	19.2288	0.746576			#N/A	Q91VH2	Snx9	Sorting nexin-9	Snx9	20.5241	0.497609		+	#N/A	O70480	Vamp4	Vesicle-associated membrane protein 4	Vamp4	18.1064	0.236151		+		O08688	Capn5	Calpain-5	Capn5	18.8312	0.640549
E9PYP2	Nbeal1	Neurobeachin-like 1	Nbeal1	18.3068	0.517211			#N/A	Q91VI7	Rnh1	Ribonuclease inhibitor	Rnh1	23.857	0.18108		+	#N/A	O88428	Papss2	Bifunctional 3'-phosphoadenosine 5'-phosphosulfate synthase 2	Papss2	21.4686	0.608237		+		O08692	Ngp	Neutrophilic granule protein	Ngp	24.4545	2.12841
E9PZ26	Brd1	Bromodomain-containing 1	Brd1	15.5223	1.53757			#N/A	Q91VK1	Bzw2	Basic leucine zipper and W2 domain-containing protein 2	Bzw2	21.0945	0.685518		+	#N/A	O88455	Dhcr7	7-dehydrocholesterol reductase	Dhcr7	21.016	0.444708		+		O08709	Prdx6	Peroxiredoxin-6	Prdx6	24.8279	0.930099
E9PZJ8	Ascc3	Activating signal cointegrator 1 complex subunit 3	Ascc3	19.6296	0.644875			#N/A	Q91WC9	Daglb	Sn1-specific diacylglycerol lipase beta	Daglb	18.2793	0.551712		+	#N/A	O88844	Idh1	Isocitrate dehydrogenase [NADP] cytoplasmic	Idh1	23.1461	0.2502		+		O08715	Akap1	A-kinase anchor protein 1, mitochondrial	Akap1	18.9641	0.796785
E9PZM4	Chd2	Chromodomain-helicase-DNA-binding protein 2	Chd2	17.4758	0.585018			#N/A	Q91WG4	Elp2	Elongator complex protein 2	Elp2	18.6259	0.362472		+	#N/A	O88876	Dhrs3	Short-chain dehydrogenase/reductase 3	Dhrs3	19.7059	0.224338		+		O08734	Bak1	Bcl-2 homologous antagonist/killer	Bak1	19.4343	0.628581
E9PZM7	Scaf11	SR-related CTD-associated factor 11	Scaf11	18.5545	0.282993			#N/A	Q91XC8	Dap	Death-associated protein 1	Dap	21.7156	0.759791		+	#N/A	O88958	Gnpda1	Glucosamine-6-phosphate isomerase 1	Gnpda1	18.7552	0.54722		+		O08739	Ampd3	AMP deaminase 3	Ampd3	19.8671	0.972993
E9Q0B5	Fcgbp	Fc fragment of IgG-binding protein	Fcgbp	25.9327	0.380104			#N/A	Q91Y74	St3gal4	CMP-N-acetylneuraminate-beta-galactosamide-alpha-2,3-sialyltransferase 4	St3gal4	18.3554	0.859567		+	#N/A	P01910	H2-Aa	H-2 class II histocompatibility antigen, A-K alpha chain	H2-Aa	18.5206	1.22946		+		O08746	Matn2	Matrilin-2	Matn2	19.2383	0.812466
E9Q0F0	Krt78	Keratin 78	Krt78	22.8269	1.2167			#N/A	Q922J3	Clip1	CAP-Gly domain-containing linker protein 1	Clip1	19.2399	0.491529		+	#N/A	P04230	H2-Eb1	H-2 class II histocompatibility antigen, E-B beta chain	H2-Eb1	16.2497	0.848632		+		O08749	Dld	Dihydrolipoyl dehydrogenase, mitochondrial	Dld	23.2293	0.809992
E9Q137	Tex264	Testis-expressed gene 264	Tex264	19.6497	0.913014			#N/A	Q99J09	Wdr77	Methylosome protein 50	Wdr77	19.6639	0.803398		+	#N/A	P04370	Mbp	Myelin basic protein	Mbp	17.2923	0.628765		+		O08756	Hsd17b10	3-hydroxyacyl-CoA dehydrogenase type-2	Hsd17b10	21.474	1.19852
E9Q166	Atad2b	ATPase family, AAA domain-containing 2B	Atad2b	20.4381	1.04792			#N/A	Q99JW2	Acy1	Aminoacylase-1	Acy1	20.9313	0.279422		+	#N/A	P04441	Cd74	H-2 class II histocompatibility antigen gamma chain	Cd74	18.8828	0.836361		+		O08759	Ube3a	Ubiquitin-protein ligase E3A	Ube3a	20.0387	0.970041
E9Q1F5	Myo5c	Myosin VC	Myo5c	18.936	0.202765			#N/A	Q99JY0	Hadhb	Trifunctional enzyme subunit beta, mitochondrial	Hadhb	24.23	0.405089		+	#N/A	P08003	Pdia4	Protein disulfide-isomerase A4	Pdia4	21.8418	0.244412		+		O08788	Dctn1	Dynactin subunit 1	Dctn1	20.7174	0.129766
E9Q1P8	Irf2bp2	Interferon regulatory factor 2-binding protein 2	Irf2bp2	20.4153	0.401454			#N/A	Q99K85	Psat1	Phosphoserine aminotransferase	Psat1	19.5513	0.555281		+	#N/A	P0C0S6;Q3THW5	H2afv;H2afz	Histone H2A.Z	H2afv	23.1365	0.428234		+		O08795	Prkcsh	Glucosidase 2 subunit beta	Prkcsh	23.1983	0.363033
E9Q1W3	Neb	Nebulin	Neb	22.9732	1.40327			#N/A	Q99LR1	Abhd12	Monoacylglycerol lipase ABHD12	Abhd12	19.0951	0.772827		+	#N/A	P10107	Anxa1	Annexin A1	Anxa1	25.4635	0.415076		+		O08796	Eef2k	Eukaryotic elongation factor 2 kinase	Eef2k	19.9349	0.595744
E9Q1Z0	Krt90	Keratin 90	Krt90	18.7296	2.30149			#N/A	Q99LS3	Psph	Phosphoserine phosphatase	Psph	18.5939	0.376151		+	#N/A	P10417	Bcl2	Apoptosis regulator Bcl-2	Bcl2	17.0928	1.0331		+		O08797	Serpinb9	SPI6	Serpinb9	19.6666	0.900292
E9Q238	Kank1	KN motif and ankyrin repeat domains 1	Kank1	17.8271	0.54833			#N/A	Q9CQ73	Pkp2	Plakophilin 2	Pkp2	20.2792	0.40496		+	#N/A	P11276	Fn1	Fibronectin	Fn1	25.0683	0.527073		+		O08807	Prdx4	Peroxiredoxin-4	Prdx4	24.2059	0.768167
E9Q394	Akap13	A-kinase anchor protein 13	Akap13	19.0611	0.5381			#N/A	Q9CQF3	Nudt21	Cleavage and polyadenylation specificity factor subunit 5	Nudt21	19.7311	0.781418		+	#N/A	P12265	Gusb	Beta-glucuronidase	Gusb	20.6306	0.7495		+		O08808	Diaph1	Protein diaphanous homolog 1	Diaph1	19.7843	1.08436
E9Q3A7	Cdh19	Cadherin 19, type 2	Cdh19	17.3866	0.194781			#N/A	Q9CQF9	Pcyox1	Prenylcysteine oxidase	Pcyox1	19.8335	0.776861		+	#N/A	P13808	Slc4a2	Anion exchange protein 2	Slc4a2	18.2852	0.231977		+		O08810	Eftud2	116 kDa U5 small nuclear ribonucleoprotein component	Eftud2	20.9679	0.406149
E9Q3E1	Aldh3b2	Aldehyde dehydrogenase family 3 member B2	Aldh3b2	17.3142	1.32018			#N/A	Q9CR57	Rpl14	60S ribosomal protein L14	Rpl14	21.4502	0.604271		+	#N/A	P13864	Dnmt1	DNA (cytosine-5)-methyltransferase 1	Dnmt1	19.8077	0.278909		+		O08832	Galnt4	Polypeptide N-acetylgalactosaminyltransferase 4	Galnt4	20.4048	0.367815
E9Q3G8	Nup153	Nucleoporin 153	Nup153	19.605	0.210683			#N/A	Q9CWJ9	Atic	Bifunctional purine biosynthesis protein PURH	Atic	22.5403	0.340642		+	#N/A	P14733	Lmnb1	Lamin-B1	Lmnb1	24.1676	0.242564		+		O08912	Galnt1	Polypeptide N-acetylgalactosaminyltransferase 1	Galnt1	19.5791	0.55192
E9Q3L2	Pi4ka	Phosphatidylinositol 4-kinase alpha	Pi4ka	20.312	0.39193			#N/A	Q9CY66	Gar1	H/ACA ribonucleoprotein complex subunit 1	Gar1	20.8582	0.782165		+	#N/A	P15105	Glul	Glutamine synthetase	Glul	21.7796	0.689118		+		O08915	Aip	AH receptor-interacting protein	Aip	19.2497	0.660087
E9Q409	Prss32	Protease, serine 32	Prss32	20.2359	0.489689			#N/A	Q9D0K2	Oxct1	Succinyl-CoA:3-ketoacid coenzyme A transferase 1, mitochondrial	Oxct1	21.4752	1.37772		+	#N/A	P18654	Rps6ka3	Ribosomal protein S6 kinase alpha-3	Rps6ka3	20.6621	0.311698		+		O08917	Flot1	Flotillin-1	Flot1	20.4509	0.472766
E9Q411	Nbas	Neuroblastoma-amplified sequence	Nbas	18.2362	0.317396			#N/A	Q9D1T5	Prr15	Proline-rich protein 15	Prr15	19.9322	0.438776		+	#N/A	P18828	Sdc1	Syndecan-1	Sdc1	20.9705	0.842918		+		O08997	Atox1	Copper transport protein ATOX1	Atox1	22.1441	0.345813
E9Q438	Olfr749	Olfactory receptor	Olfr749	15.8781	0.340651			#N/A	Q9D379	Ephx1	Epoxide hydrolase 1	Ephx1	22.4128	0.434776		+	#N/A	P22437	Ptgs1	Prostaglandin G/H synthase 1	Ptgs1	20.8629	0.589686		+		O09012	Pex5	Peroxisomal targeting signal 1 receptor	Pex5	18.1172	0.823555
E9Q4N7	Arid1b	AT-rich interactive domain-containing protein 1B	Arid1b	17.8517	0.329824			#N/A	Q9D7G0	Prps1	Ribose-phosphate pyrophosphokinase 1	Prps1	20.2865	0.992658		+	#N/A	P23198	Cbx3	Chromobox protein homolog 3	Cbx3	21.1169	0.648211		+		O09043	Napsa	Napsin-A	Napsa	18.781	1.02971
E9Q4Z2	Acacb	Acetyl-CoA carboxylase 2	Acacb	17.8325	1.6801			#N/A	Q9D7X3	Dusp3	Dual specificity protein phosphatase 3	Dusp3	20.5126	1.57343		+	#N/A	P23949	Zfp36l2	mRNA decay activator protein ZFP36L2	Zfp36l2	17.4071	0.732766		+		O09044	Snap23	Synaptosomal-associated protein 23	Snap23	21.4605	0.619653
E9Q512	Trip11	Thyroid hormone receptor interactor 11	Trip11	19.2931	0.314243			#N/A	Q9D8U8	Snx5	Sorting nexin-5	Snx5	19.5226	0.456551		+	#N/A	P26039	Tln1	Talin-1	Tln1	24.4981	0.288582		+		O09061	Psmb1	Proteasome subunit beta type-1	Psmb1	23.7353	1.01928
E9Q555	Rnf213	E3 ubiquitin-protein ligase RNF213	Rnf213	19.6414	0.220755			#N/A	Q9DBS5	Klc4	Kinesin light chain 4	Klc4	20.4539	0.279019		+	#N/A	P27784	Ccl6	C-C motif chemokine 6	Ccl6	19.6393	1.22623		+		O09106	Hdac1	Histone deacetylase 1	Hdac1	19.0655	0.860951
E9Q557	Dsp	Desmoplakin	Dsp	23.3755	0.171093			#N/A	Q9DBT5	Ampd2	AMP deaminase 2	Ampd2	19.4189	0.205009		+	#N/A	P28078	H2-DMa	Class II histocompatibility antigen, M alpha chain	H2-DMa	20.0826	0.755494		+		O09110	Map2k3	Dual specificity mitogen-activated protein kinase kinase 3	Map2k3	19.7378	0.379397
E9Q5K9	Ythdc1	YTH domain-containing protein 1	Ythdc1	18.5306	0.645353			#N/A	Q9DC11	Plxdc2	Plexin domain-containing protein 2	Plxdc2	19.0487	0.0579342		+	#N/A	P28271	Aco1	Cytoplasmic aconitate hydratase	Aco1	21.9089	0.231034		+		O09116	Sprr3	Small proline-rich protein 3	Sprr3	20.2492	1.25874
E9Q634	Myo1e	Unconventional myosin-Ie	Myo1e	20.4725	0.257956			#N/A	Q9DCL9	Paics	Multifunctional protein ADE2	Paics	20.6936	0.665857		+	#N/A	P28658	Atxn10	Ataxin-10	Atxn10	18.6131	0.452927		+		O09117	Sypl1	Synaptophysin-like protein 1	Sypl1	19.8505	0.597967
E9Q6E5	Srsf11	Serine/arginine-rich-splicing factor 11	Srsf11	17.594	0.265933			#N/A	Q9DCZ1	Gmpr	GMP reductase 1	Gmpr	20.2819	0.581867		+	#N/A	P29387	Gnb4	Guanine nucleotide-binding protein subunit beta-4	Gnb4	19.3157	0.475674		+		O09131	Gsto1	Glutathione S-transferase omega-1	Gsto1	23.7178	0.668175
E9Q6H8	Plekha5	Pleckstrin homology domain-containing, family A member 5	Plekha5	20.0441	0.375485			#N/A	Q9EQ08	Sgsh	Heparan N-sulfatase	Sgsh	16.5822	2.26504		+	#N/A	P35979	Rpl12	60S ribosomal protein L12	Rpl12	21.0813	1.339		+		O09159	Man2b1	Lysosomal alpha-mannosidase	Man2b1	19.7283	0.595301
E9Q6J5	Bod1l	Biorientation of chromosomes in cell division protein 1-like 1	Bod1l	17.5266	0.671408			#N/A	Q9ERT9	Ppp1r1a	Protein phosphatase 1 regulatory subunit 1A	Ppp1r1a	16.694	0.75788		+	#N/A	P38060	Hmgcl	Hydroxymethylglutaryl-CoA lyase, mitochondrial	Hmgcl	20.4156	0.328547		+		O09161	Casq2	Calsequestrin-2	Casq2	18.3314	0.50936
E9Q6R7	Utrn	Utrophin	Utrn	20.5938	0.217587			#N/A	Q9ESX5	Dkc1	H/ACA ribonucleoprotein complex subunit DKC1	Dkc1	21.048	0.631164		+	#N/A	P40240	Cd9	CD9 antigen	Cd9	21.435	0.108624		+		O09164	Sod3	Extracellular superoxide dismutase [Cu-Zn]	Sod3	19.6674	1.21894
E9Q735	Ube4a	Ubiquitin conjugation factor E4 A	Ube4a	18.966	0.8144			#N/A	Q9ESZ8	Gtf2i	General transcription factor II-I	Gtf2i	19.7476	0.42002		+	#N/A	P41245	Mmp9	Matrix metalloproteinase-9	Mmp9	20.0446	0.837932		+		O09167	Rpl21	60S ribosomal protein L21	Rpl21	22.7693	0.544793
E9Q784	Zc3h13	Zinc finger CCCH domain-containing protein 13	Zc3h13	18.3767	0.829412			#N/A	Q9ET30	Tm9sf3	Transmembrane 9 superfamily member 3	Tm9sf3	20.1405	0.442334		+	#N/A	P45952	Acadm	Medium-chain specific acyl-CoA dehydrogenase, mitochondrial	Acadm	22.2453	0.420936		+		O09172	Gclm	Glutamate--cysteine ligase regulatory subunit	Gclm	20.8821	0.502166
E9Q7D5	Arhgef5	Rho guanine nucleotide exchange factor 5	Arhgef5	18.3009	0.419655			#N/A	Q9JJD0	Thap11	THAP domain-containing protein 11	Thap11	17.5875	0.61936		+	#N/A	P48678	Lmna	Prelamin-A/C	Lmna	26.0491	0.186034		+		O35071	Kif1c	Kinesin-like protein KIF1C	Kif1c	18.6712	0.582158
E9Q7P9	Cdhr2	Cadherin-related family member 2	Cdhr2	20.6099	0.511824			#N/A	Q9JJG0	Tacc2	Transforming acidic coiled-coil-containing protein 2	Tacc2	19.3844	1.16121		+	#N/A	P49446	Ptpre	Receptor-type tyrosine-protein phosphatase epsilon	Ptpre	18.9085	0.284469		+		O35074	Ptgis	Prostacyclin synthase	Ptgis	20.7933	0.52105
E9Q8D0	Dnajc21	DnaJ homolog subfamily C member 21	Dnajc21	16.9297	0.814337			#N/A	Q9JJZ2	Tuba8	Tubulin alpha-8 chain	Tuba8	19.8635	0.94474		+	#N/A	P49586	Pcyt1a	Choline-phosphate cytidylyltransferase A	Pcyt1a	19.9953	0.190229		+		O35075	Dscr3	Down syndrome critical region protein 3 homolog	Dscr3	19.2035	0.691586
E9Q8I7	Nfxl1	Nuclear transcription factor, X-box-binding-like 1	Nfxl1	18.1414	1.22225			#N/A	Q9JL62	Gltp	Glycolipid transfer protein	Gltp	19.0716	0.594262		+	#N/A	P50580	Pa2g4	Proliferation-associated protein 2G4	Pa2g4	23.5223	0.182478		+		O35083	Agpat1	1-acyl-sn-glycerol-3-phosphate acyltransferase alpha	Agpat1	18.6957	0.814154
E9Q8T7	Dnah1	Dynein heavy chain 1, axonemal	Dnah1	20.9613	0.473402			#N/A	Q9JLM8	Dclk1	Serine/threonine-protein kinase DCLK1	Dclk1	17.5445	1.02863		+	#N/A	P51912	Slc1a5	Neutral amino acid transporter B(0)	Slc1a5	19.4026	0.55749		+		O35114	Scarb2	Lysosome membrane protein 2	Scarb2	19.7568	1.18509
E9Q912	Rap1gds1	RAP1, GTP-GDP dissociation stimulator 1	Rap1gds1	19.5845	0.344511			#N/A	Q9QX60	Dguok	Deoxyguanosine kinase, mitochondrial	Dguok	19.6785	1.10495		+	#N/A	P53808	Pctp	Phosphatidylcholine transfer protein	Pctp	18.971	0.602524		+		O35129	Phb2	Prohibitin-2	Phb2	23.3407	0.488039
E9Q9B7	Kidins220	Kinase D-interacting substrate 220	Kidins220	16.661	0.762192			#N/A	Q9QXE0	Hacl1	2-hydroxyacyl-CoA lyase 1	Hacl1	18.3971	1.13006		+	#N/A	P57759	Erp29	Endoplasmic reticulum resident protein 29	Erp29	20.0216	0.510735		+		O35134	Polr1a	DNA-directed RNA polymerase I subunit RPA1	Polr1a	17.9386	0.114516
E9Q9K5	Trdn	Triadin	Trdn	19.9469	0.850751			#N/A	Q9QXS1	Plec	Plectin	Plec	24.0901	0.486716		+	#N/A	P59759	Mkl2	MKL/myocardin-like protein 2	Mkl2	18.752	0.366788		+		O35143	ATP5IF1	ATPase inhibitor, mitochondrial	ATP5IF1	21.0804	1.81513
E9QA15	Cald1	Caldesmon 1	Cald1	25.1218	0.511078			#N/A	Q9QXX4	Slc25a13	Calcium-binding mitochondrial carrier protein Aralar2	Slc25a13	19.962	0.364841		+	#N/A	P62071	Rras2	Ras-related protein R-Ras2	Rras2	18.4317	0.475762		+		O35153	Bet1l	BET1-like protein	Bet1l	18.5468	0.499814
E9QAB6	Ptar1	Protein prenyltransferase alpha subunit repeat-containing 1	Ptar1	19.0194	0.139085			#N/A	Q9QYB5	Add3	Gamma-adducin	Add3	22.0534	0.59785		+	#N/A	P62631	Eef1a2	Elongation factor 1-alpha 2	Eef1a2	20.5783	1.24617		+		O35206	Col15a1	Collagen alpha-1(XV) chain	Col15a1	21.6479	0.713117
E9QAE3	Btaf1	B-TFIID TATA-box-binding protein-associated factor 1	Btaf1	17.5709	1.27383			#N/A	Q9QZF2	Gpc1	Glypican-1	Gpc1	17.0774	1.02252		+	#N/A	P63254	Crip1	Cysteine-rich protein 1	Crip1	25.2543	0.382365		+		O35215	Ddt	D-dopachrome decarboxylase	Ddt	22.1707	0.804164
E9QAN8	Pik3c2b	Phosphatidylinositol-4-phosphate 3-kinase catalytic subunit type 2 beta	Pik3c2b	17.7231	0.998085			#N/A	Q9R0Y5	Ak1	Adenylate kinase isoenzyme 1	Ak1	21.8773	0.88891		+	#N/A	P63328	Ppp3ca	Serine/threonine-protein phosphatase 2B catalytic subunit alpha isoform	Ppp3ca	21.1635	0.202098		+		O35216	Cenpa	Histone H3-like centromeric protein A	Cenpa	18.2722	0.745831
F2Z3U3	Raph1	Ras association (RalGDS/AF-6) and pleckstrin homology domains 1	Raph1	23.2243	1.07254			#N/A	Q9R111	Gda	Guanine deaminase	Gda	20.4279	0.306695		+	#N/A	P68368	Tuba4a	Tubulin alpha-4A chain	Tuba4a	24.9549	0.362131		+		O35218	Cpsf2	Cleavage and polyadenylation specificity factor subunit 2	Cpsf2	18.72	0.325776
F2Z472	Svs3a	Seminal vesicle secretory protein 3A	Svs3a	23.6445	2.33835			#N/A	Q9WU03	Spint2	Kunitz-type protease inhibitor 2	Spint2	19.6052	0.759769		+	#N/A	P70175	Dlg3	Disks large homolog 3	Dlg3	19.2484	0.360529		+		O35226	Psmd4	26S proteasome non-ATPase regulatory subunit 4	Psmd4	20.8692	0.732999
F6ZDS4	Tpr	Nucleoprotein TPR	Tpr	20.908	0.457466			#N/A	Q9WUA3	Pfkp	ATP-dependent 6-phosphofructokinase, platelet type	Pfkp	23.675	0.262386		+	#N/A	P70255	Nfic	Nuclear factor 1 C-type	Nfic	18.7956	0.584289		+		O35245	Pkd2	Polycystin-2	Pkd2	17.2018	1.34449
F7BJK1	Pcdh1	Protocadherin 1 (Fragment)	Pcdh1	17.9825	0.748078			#N/A	Q9WUK4	Rfc2	Replication factor C subunit 2	Rfc2	18.722	0.654636		+	#N/A	P70271	Pdlim4	PDZ and LIM domain protein 4	Pdlim4	21.8247	0.340252		+		O35250	Exoc7	Exocyst complex component 7	Exoc7	18.7734	0.587288
F7BWT7	Tspan15	Tetraspanin-15	Tspan15	17.3104	0.327981			#N/A	Q9WUM4	Coro1c	Coronin-1C	Coro1c	22.723	0.361335		+	#N/A	P81122	Irs2	Insulin receptor substrate 2	Irs2	18.0008	0.246746		+		O35286	Dhx15	Pre-mRNA-splicing factor ATP-dependent RNA helicase DHX15	Dhx15	20.7906	0.283102
F8VPK0	Ttc37	Tetratricopeptide repeat domain 37	Ttc37	19.1193	0.162484			#N/A	Q9WVA2	Timm8a1	Mitochondrial import inner membrane translocase subunit Tim8 A	Timm8a1	18.5346	0.839065		+	#N/A	P84091	Ap2m1	AP-2 complex subunit mu	Ap2m1	21.6001	0.26257		+		O35295	Purb	Transcriptional activator protein Pur-beta	Purb	21.8108	0.420754
F8VPN4	Agl	Amylo-1,6-glucosidase, 4-alpha-glucanotransferase	Agl	22.2753	0.711054			#N/A	Q9Z1G4	Atp6v0a1	V-type proton ATPase 116 kDa subunit a isoform 1	Atp6v0a1	19.0202	0.43611		+	#N/A	P97302	Bach1	Transcription regulator protein BACH1	Bach1	17.9587	0.249245		+		O35326	Srsf5	Serine/arginine-rich splicing factor 5	Srsf5	21.0637	0.651593
F8VPP8	Zc3h7b	Zinc finger CCCH type-containing 7B	Zc3h7b	17.5726	2.06742			#N/A	A0A087WQ44	Srcap	Snf2-related CREBBP activator protein	Srcap	17.2469	0.348409			#N/A	P97429	Anxa4	Annexin A4	Anxa4	23.2178	0.398606		+		O35343	Kpna4	Importin subunit alpha-3	Kpna4	18.1318	0.715129
F8VPU2	Farp1	FERM, ARHGEF and pleckstrin domain-containing protein 1	Farp1	19.2085	0.409552			#N/A	A0A087WR45	Prob1	Proline-rich basic protein 1	Prob1	18.0381	0.391204			#N/A	P97449	Anpep	Aminopeptidase N	Anpep	21.1346	0.339149		+		O35350	Capn1	Calpain-1 catalytic subunit	Capn1	21.8056	0.259375
F8VQ05	Fryl	FRY-like transcription coactivator	Fryl	18.0302	0.465633			#N/A	A0A0A6YVW3;A0A0A6YXA5	Ighv1-15;Ighv1-23	Immunoglobulin heavy variable V1-23 (Fragment)	Ighv1-15	19.509	0.634678			#N/A	P97499	Tep1	Telomerase protein component 1	Tep1	19.9713	0.320235		+		O35375	Nrp2	Neuropilin-2	Nrp2	19.6133	0.805547
F8VQC1	Srp72	Signal recognition particle subunit SRP72	Srp72	19.9383	0.36282			#N/A	A0A0A6YXW6	Igha	Immunoglobulin heavy constant alpha (Fragment)	Igha	23.3849	1.08936			#N/A	P97742	Cpt1a	Carnitine O-palmitoyltransferase 1, liver isoform	Cpt1a	21.2378	0.15662		+		O35379	Abcc1	Multidrug resistance-associated protein 1	Abcc1	19.405	0.214571
G3UW81	Cyp4f40	Cytochrome P450, family 4, subfamily f, polypeptide 40	Cyp4f40	17.9107	0.536309			#N/A	A0A0B4J1F9	Tchh	Trichohyalin	Tchh	19.4855	0.897084			#N/A	P97855	G3bp1	Ras GTPase-activating protein-binding protein 1	G3bp1	22.9144	0.285622		+		O35381	Anp32a	Acidic leucine-rich nuclear phosphoprotein 32 family member A	Anp32a	23.9153	0.431285
G3UW82	Myh2	MCG140437, isoform CRA_d	Myh2	23.3215	1.3505			#N/A	A0A0B4J1J6	Ighv10-1	Immunoglobulin heavy variable 10-1 (Fragment)	Ighv10-1	21.0851	1.76478			#N/A	Q00560	Il6st	Interleukin-6 receptor subunit beta	Il6st	18.6109	0.348917		+		O35382	Exoc4	Exocyst complex component 4	Exoc4	19.5093	0.632884
G3X8U3	2210016F16Rik	Queuosine salvage protein	2210016F16Rik	21.8857	0.392869			#N/A	A0A0J9YUD5	Nup205	Nucleoporin 205	Nup205	19.4569	0.743911			#N/A	Q02248	Ctnnb1	Catenin beta-1	Ctnnb1	21.4008	0.462341		+		O35386	Phyh	Phytanoyl-CoA dioxygenase, peroxisomal	Phyh	18.4034	0.931044
G3X8X0	Dhx16	DEAH (Asp-Glu-Ala-His) box polypeptide 16	Dhx16	17.3534	0.29311			#N/A	A0A0U1RNF2	Lcmt1	Leucine carboxyl methyltransferase 1	Lcmt1	19.6182	0.611613			#N/A	Q08857	Cd36	Platelet glycoprotein 4	Cd36	19.2344	0.543253		+		O35400	Sult2b1	Sulfotransferase family cytosolic 2B member 1	Sult2b1	18.73	1.00321
G3X939	Slc9a3	Sodium/hydrogen exchanger 3	Slc9a3	18.3086	0.69415			#N/A	A0A140LIJ4	Dnah14	Dynein, axonemal, heavy chain 14	Dnah14	20.0938	1.59238			#N/A	Q32NY4	Cnnm3	Metal transporter CNNM3	Cnnm3	17.979	0.254811		+		O35405	Pld3	Phospholipase D3	Pld3	20.3075	1.05335
G3X972	Sec24c	SEC24 related gene family, member C (S. cerevisiae), isoform CRA_a	Sec24c	21.1274	0.315451			#N/A	A0A1L1SQU7	Fat1	FAT atypical cadherin 1	Fat1	17.8819	0.777819			#N/A	Q3TB82	Plekhf1	Pleckstrin homology domain-containing family F member 1	Plekhf1	17.9233	0.246736		+		O35425	Bok	Bcl-2-related ovarian killer protein	Bok	17.503	1.56721
G3X9B1	Heatr1	HEAT repeat-containing 1	Heatr1	17.9076	0.59719			#N/A	A0A2I3BQG2	Crybg2	Crystallin beta-gamma domain-containing 2	Crybg2	16.4727	0.533613			#N/A	Q3TEA8	Hp1bp3	Heterochromatin protein 1-binding protein 3	Hp1bp3	21.8854	0.100863		+		O35435	Dhodh	Dihydroorotate dehydrogenase (quinone), mitochondrial	Dhodh	19.4984	0.415496
G3X9C2	Nccrp1	F-box only protein 50	Nccrp1	19.5915	0.966865			#N/A	A0A2R8VHP3	Gm5478	Uncharacterized protein	Gm5478	23.8503	1.82699			#N/A	Q3TIU4	Pde12	2',5'-phosphodiesterase 12	Pde12	18.6579	0.38469		+		O35452	Tnxb	Tenascin X	Tnxb	21.3646	0.376643
G3X9G9	Mettl7a3	MCG123521, isoform CRA_a	Mettl7a3	18.511	1.02766			#N/A	A2A432	Cul4b	Cullin-4B	Cul4b	18.5012	0.802796			#N/A	Q3TWW8	Srsf6	Serine/arginine-rich splicing factor 6	Srsf6	24.908	0.18634		+		O35459	Ech1	Delta(3,5)-Delta(2,4)-dienoyl-CoA isomerase, mitochondrial	Ech1	20.5431	1.11
G3X9J0	Sipa1l3	Signal-induced proliferation-associated 1-like protein 3	Sipa1l3	17.82	0.551905			#N/A	A2A484	Zmynd8	Zinc finger, MYND-type-containing 8	Zmynd8	16.6213	0.742003			#N/A	Q3UHC7	Dab2ip	Disabled homolog 2-interacting protein	Dab2ip	19.2424	0.789087		+		O35465	Fkbp8	Peptidyl-prolyl cis-trans isomerase FKBP8	Fkbp8	19.2056	0.320981
G3X9K3	Arfgef1	Brefeldin A-inhibited guanine nucleotide-exchange protein 1	Arfgef1	19.1545	0.665288			#N/A	A2A4P0	Dhx8	ATP-dependent RNA helicase DHX8	Dhx8	18.8601	1.13267			#N/A	Q3USJ8	Fchsd2	F-BAR and double SH3 domains protein 2	Fchsd2	15.5745	0.951398		+		O35551	Rabep1	Rab GTPase-binding effector protein 1	Rabep1	18.1366	0.771883
G3X9V8	Serpinb3a	MCG129038	Serpinb3a	20.7343	1.19005			#N/A	A2A5R2	Arfgef2	Brefeldin A-inhibited guanine nucleotide-exchange protein 2	Arfgef2	19.9357	0.187404			#N/A	Q3UV70	Pdp1	[Pyruvate dehydrogenase [acetyl-transferring]]-phosphatase 1, mitochondrial	Pdp1	18.6045	0.255292		+		O35593	Psmd14	26S proteasome non-ATPase regulatory subunit 14	Psmd14	21.6697	0.460613
G3X9Y6	Akr1c19	Aldo-keto reductase family 1, member C19	Akr1c19	22.5741	0.318168			#N/A	A2A716	Osbpl7	Oxysterol-binding protein	Osbpl7	17.0499	1.4029			#N/A	Q3V3Q7	Pacs2	Phosphofurin acidic cluster sorting protein 2	Pacs2	16.4025	0.871523		+		O35598	Adam10	Disintegrin and metalloproteinase domain-containing protein 10	Adam10	20.8288	0.259739
G5E829	Atp2b1	Plasma membrane calcium-transporting ATPase 1	Atp2b1	21.4075	0.277599			#N/A	A2A7S8	Kiaa1522	Uncharacterized protein KIAA1522	Kiaa1522	19.892	0.456088			#N/A	Q3V3R4	Itga1	Integrin alpha-1	Itga1	22.8569	0.290819		+		O35601	Fyb1	FYN-binding protein 1	Fyb1	18.2497	0.819192
G5E870	Trip12	E3 ubiquitin-protein ligase TRIP12	Trip12	18.9787	0.5326			#N/A	A2A863	Itgb4	Integrin beta-4	Itgb4	22.0681	0.129294			#N/A	Q5M8N0	Cnrip1	CB1 cannabinoid receptor-interacting protein 1	Cnrip1	18.1895	0.203972		+		O35604	Npc1	NPC intracellular cholesterol transporter 1	Npc1	17.1546	0.697354
G5E895	Akr1b10	Aldo-keto reductase family 1, member B10 (aldose reductase)	Akr1b10	20.8811	0.331013			#N/A	A2A8L5	Ptprf	Receptor-type tyrosine-protein phosphatase F	Ptprf	19.187	0.152294			#N/A	Q5SWD9	Tsr1	Pre-rRNA-processing protein TSR1 homolog	Tsr1	18.3491	0.227795		+		O35609	Scamp3	Secretory carrier-associated membrane protein 3	Scamp3	19.5765	1.57312
G5E897	Kdelc2	KDEL (Lys-Asp-Glu-Leu) containing 2, isoform CRA_b	Kdelc2	18.2444	0.464265			#N/A	A2A8U2	Tmem201	Transmembrane protein 201	Tmem201	18.6969	0.555169			#N/A	Q5SYD0	Myo1d	Unconventional myosin-Id	Myo1d	22.8232	0.480701		+		O35638	Stag2	Cohesin subunit SA-2	Stag2	18.8548	1.03409
G5E8J6	Hrc	Histidine rich calcium binding protein, isoform CRA_a	Hrc	17.479	0.788249			#N/A	A2AAJ9	Obscn	Obscurin	Obscn	20.3589	0.752054			#N/A	Q60598	Cttn	Src substrate cortactin	Cttn	22.6415	0.137887		+		O35639	Anxa3	Annexin A3	Anxa3	23.9562	0.286011
G5E8K5	Ank3	Ankyrin-3	Ank3	20.6159	0.309212			#N/A	A2AAY5	Sh3pxd2b	SH3 and PX domain-containing protein 2B	Sh3pxd2b	19.0984	0.109068			#N/A	Q60664	Lrmp	Lymphoid-restricted membrane protein	Lrmp	18.9492	0.47592		+		O35640	Anxa8	Annexin A8	Anxa8	20.5135	0.639073
G5E8L3	Nat8f4	MCG128680, isoform CRA_a	Nat8f4	17.4653	0.404537			#N/A	A2AB59	Arhgap27	Rho GTPase-activating protein 27	Arhgap27	18.3076	0.591737			#N/A	Q60790	Rasa3	Ras GTPase-activating protein 3	Rasa3	19.2114	0.938823		+		O35643	Ap1b1	AP-1 complex subunit beta-1	Ap1b1	21.5077	0.478009
G5E8V9	Arfip1	ADP-ribosylation factor-interacting protein 1	Arfip1	21.0714	0.431489			#N/A	A2ABU4	Myom3	Myomesin-3	Myom3	21.1656	0.408166			#N/A	Q60994	Adipoq	Adiponectin	Adipoq	21.4154	0.606326		+		O35654	Pold2	DNA polymerase delta subunit 2	Pold2	17.8956	0.390514
H3BKP8	9930021J03Rik	RIKEN cDNA 9930021J03 gene	9930021J03Rik	20.7746	0.342745			#N/A	A2ACP1	Ttc39a	Tetratricopeptide repeat protein 39A	Ttc39a	19.8374	0.727611			#N/A	Q60996	Ppp2r5c	Serine/threonine-protein phosphatase 2A 56 kDa regulatory subunit gamma isoform	Ppp2r5c	18.0333	0.676932		+		O35682	Myadm	Myeloid-associated differentiation marker	Myadm	19.327	1.94269
I7HPW8	Myo15b	Myosin XVB	Myo15b	20.5104	0.58528			#N/A	A2ADY9	Ddi2	Protein DDI1 homolog 2	Ddi2	20.7809	0.572781			#N/A	Q61176	Arg1	Arginase-1	Arg1	20.1082	0.903178		+		O35685	Nudc	Nuclear migration protein nudC	Nudc	21.2259	0.511912
J3QN89	Aamp	Angio-associated migratory protein	Aamp	18.6443	0.397168			#N/A	A2AF47	Dock11	Dedicator of cytokinesis protein 11	Dock11	18.2549	0.283516			#N/A	Q61193	Rgl2	Ral guanine nucleotide dissociation stimulator-like 2	Rgl2	16.7276	0.666462		+		O35691	Pnn	Pinin	Pnn	20.2541	0.253503
K7N6C2	Cyp2c68	Cytochrome P450, family 2, subfamily c, polypeptide 68	Cyp2c68	15.9601	0.532574			#N/A	A2AFS3	Kiaa1324	UPF0577 protein KIAA1324	Kiaa1324	17.9797	1.02953			#N/A	Q61263	Soat1	Sterol O-acyltransferase 1	Soat1	17.1301	0.949301		+		O35704	Sptlc1	Serine palmitoyltransferase 1	Sptlc1	19.7647	0.303691
O08529	Capn2	Calpain-2 catalytic subunit	Capn2	22.2512	0.170197			#N/A	A2AGT5	Ckap5	Cytoskeleton-associated protein 5	Ckap5	19.7419	0.324815			#N/A	Q61425	Hadh	Hydroxyacyl-coenzyme A dehydrogenase, mitochondrial	Hadh	22.7012	0.356906		+		O35737	Hnrnph1	Heterogeneous nuclear ribonucleoprotein H	Hnrnph1	23.3239	0.367556
O08532	Cacna2d1	Voltage-dependent calcium channel subunit alpha-2/delta-1	Cacna2d1	21.9745	0.192609			#N/A	A2AI08	Tprn	Taperin	Tprn	18.8474	0.55097			#N/A	Q61753	Phgdh	D-3-phosphoglycerate dehydrogenase	Phgdh	21.6095	0.341385		+		O35841	Api5	Apoptosis inhibitor 5	Api5	20.8817	0.343503
O08539	Bin1	Myc box-dependent-interacting protein 1	Bin1	22.3913	0.668511			#N/A	A2AJ76	Hmcn2	Hemicentin-2	Hmcn2	19.006	0.510655			#N/A	Q61823	Pdcd4	Programmed cell death protein 4	Pdcd4	21.4316	0.42483		+		O35855	Bcat2	Branched-chain-amino-acid aminotransferase, mitochondrial	Bcat2	20.8186	0.89426
O08547	Sec22b	Vesicle-trafficking protein SEC22b	Sec22b	21.2423	0.14993			#N/A	A2AJI0	Map7d1	MAP7 domain-containing protein 1	Map7d1	18.9248	0.417518			#N/A	Q61830	Mrc1	Macrophage mannose receptor 1	Mrc1	21.2068	0.696258		+		O35857	Timm44	Mitochondrial import inner membrane translocase subunit TIM44	Timm44	19.6974	0.508086
O08553	Dpysl2	Dihydropyrimidinase-related protein 2	Dpysl2	24.238	0.491292			#N/A	A2AKG8	Focad	Focadhesin	Focad	16.7844	0.116113			#N/A	Q62165	Dag1	Dystroglycan	Dag1	22.1007	0.239617		+		O35864	Cops5	COP9 signalosome complex subunit 5	Cops5	20.6075	0.201813
O08573	Lgals9	Galectin-9	Lgals9	21.0241	0.547063			#N/A	A2ALK8	Ptpn3	Tyrosine-protein phosphatase non-receptor type 3	Ptpn3	18.3429	0.749219			#N/A	Q62172	Ralbp1	RalA-binding protein 1	Ralbp1	19.414	1.13772		+		O35887	Calu	Calumenin	Calu	23.1974	0.645039
O08579	Emd	Emerin	Emd	19.9909	0.163054			#N/A	A2AMM0	Cavin4	Caveolae-associated protein 4	Cavin4	18.6085	1.1042			#N/A	Q62179	Sema4b	Semaphorin-4B	Sema4b	18.94	0.617308		+		O35945	Aldh1a7	Aldehyde dehydrogenase, cytosolic 1	Aldh1a7	17.8231	0.787672
O08582	Gtpbp1	GTP-binding protein 1	Gtpbp1	18.6773	0.713184			#N/A	A2AN08	Ubr4	E3 ubiquitin-protein ligase UBR4	Ubr4	20.4249	0.239524			#N/A	Q62351	Tfrc	Transferrin receptor protein 1	Tfrc	21.1944	0.427935		+		O35988	Sdc4	Syndecan-4	Sdc4	19.8685	0.817171
O08585	Clta	Clathrin light chain A	Clta	22.9208	0.566552			#N/A	A2ANX3	Atp8b4	Phospholipid-transporting ATPase	Atp8b4	20.0629	0.728523			#N/A	Q62465	Vat1	Synaptic vesicle membrane protein VAT-1 homolog	Vat1	21.6073	0.485171		+		O54724	Cavin1	Caveolae-associated protein 1	Cavin1	23.4831	0.392742
O08586	Pten	Phosphatidylinositol 3,4,5-trisphosphate 3-phosphatase and dual-specificity protein phosphatase PTEN	Pten	19.1476	0.299389			#N/A	A2APY7	Ndufaf5	Arginine-hydroxylase NDUFAF5, mitochondrial	Ndufaf5	18.2239	0.328651			#N/A	Q63943	Mef2d	Myocyte-specific enhancer factor 2D	Mef2d	17.2749	0.205798		+		O54734	Ddost	Dolichyl-diphosphooligosaccharide--protein glycosyltransferase 48 kDa subunit	Ddost	23.3901	0.599136
O08599	Stxbp1	Syntaxin-binding protein 1	Stxbp1	20.2474	0.277493			#N/A	A2AQ25	Skt	Sickle tail protein	Skt	20.3551	0.579674			#N/A	Q64727	Vcl	Vinculin	Vcl	25.2031	0.281221		+		O54774	Ap3d1	AP-3 complex subunit delta-1	Ap3d1	19.5047	0.484151
O08600	Endog	Endonuclease G, mitochondrial	Endog	20.982	0.142983			#N/A	A2AQ99	Duox2	Dual oxidase 2	Duox2	18.8433	1.09001			#N/A	Q6DFW4	Nop58	Nucleolar protein 58	Nop58	19.3424	0.312002		+		O54782	Man2b2	Epididymis-specific alpha-mannosidase	Man2b2	19.2059	0.699399
O08638	Myh11	Myosin-11	Myh11	27.9315	0.426787			#N/A	A2AR02	Ppig	Peptidyl-prolyl cis-trans isomerase G	Ppig	19.4746	1.20656			#N/A	Q6NT99	Dusp23	Dual specificity protein phosphatase 23	Dusp23	17.998	1.16143		+		O54784	Dapk3	Death-associated protein kinase 3	Dapk3	18.9283	0.854138
O08663	Metap2	Methionine aminopeptidase 2	Metap2	21.414	0.290984			#N/A	A2ARI4	Lgr4	Leucine-rich repeat-containing G-protein coupled receptor 4	Lgr4	18.1791	0.823858			#N/A	Q6P9S7	Galnt10	Polypeptide N-acetylgalactosaminyltransferase 10	Galnt10	18.6624	1.14803		+		O54785	Limk2	LIM domain kinase 2	Limk2	19.4123	0.321281
O08664	Bcl7c	B-cell CLL/lymphoma 7 protein family member C	Bcl7c	19.0963	0.348171			#N/A	A2ASS6	Ttn	Titin	Ttn	23.7486	0.830775			#N/A	Q6PD10	Ip6k1	Inositol hexakisphosphate kinase 1	Ip6k1	16.5155	0.817666		+		O54824	Il16	Pro-interleukin-16	Il16	19.096	0.782443
O08677	Kng1	Kininogen-1	Kng1	20.3104	0.786528			#N/A	A2AUC9	Klhl41	Kelch-like protein 41	Klhl41	22.0628	0.603036			#N/A	Q6PDY2	Ado	2-aminoethanethiol dioxygenase	Ado	20.0055	0.203294		+		O54825	Bysl	Bystin	Bysl	17.3419	1.49742
O08688	Capn5	Calpain-5	Capn5	19.2588	0.838928			#N/A	A2AWA9	Rabgap1	Rab GTPase-activating protein 1	Rabgap1	17.8563	1.25392			#N/A	Q6PGB6	Naa50	N-alpha-acetyltransferase 50	Naa50	20.2837	0.20841		+		O54833	Csnk2a2	Casein kinase II subunit alpha'	Csnk2a2	20.3347	0.56667
O08709	Prdx6	Peroxiredoxin-6	Prdx6	25.7038	0.624826			#N/A	A2AWP8	Arhgef10l	Rho guanine nucleotide exchange factor 10-like protein	Arhgef10l	18.9423	0.538914			#N/A	Q7SIG6	Asap2	Arf-GAP with SH3 domain, ANK repeat and PH domain-containing protein 2	Asap2	27.0356	0.51052		+		O54865	Gucy1b1	Guanylate cyclase soluble subunit beta-1	Gucy1b1	17.7843	0.556173
O08715	Akap1	A-kinase anchor protein 1, mitochondrial	Akap1	19.2463	0.711569			#N/A	A2AX52	Col6a4	Collagen alpha-4(VI) chain	Col6a4	19.9914	0.479977			#N/A	Q7TN05	Ap1s3	AP-1 complex subunit sigma-3	Ap1s3	17.5515	0.779549		+		O54879	Hmgb3	High mobility group protein B3	Hmgb3	20.4552	0.449129
O08734	Bak1	Bcl-2 homologous antagonist/killer	Bak1	18.3142	0.296045			#N/A	A2BE28	Las1l	Ribosomal biogenesis protein LAS1L	Las1l	17.7705	0.741467			#N/A	Q7TN29	Smap2	Stromal membrane-associated protein 2	Smap2	18.8958	0.510271		+		O54916	Reps1	RalBP1-associated Eps domain-containing protein 1	Reps1	18.3165	0.73137
O08739	Ampd3	AMP deaminase 3	Ampd3	20.5271	0.945948			#N/A	A2BH40	Arid1a	AT-rich interactive domain-containing protein 1A	Arid1a	18.6768	0.840079			#N/A	Q7TSJ2	Map6	Microtubule-associated protein 6	Map6	19.3578	0.421918		+		O54931	Akap2	A-kinase anchor protein 2	Akap2	21.0759	0.533648
O08746	Matn2	Matrilin-2	Matn2	19.5755	0.505553			#N/A	A3KGB4	Tbc1d8b	TBC1 domain family member 8B	Tbc1d8b	18.4425	0.757308			#N/A	Q80UK0	Sestd1	SEC14 domain and spectrin repeat-containing protein 1	Sestd1	18.5376	0.184856		+		O54941	Smarce1	SWI/SNF-related matrix-associated actin-dependent regulator of chromatin subfamily E member 1	Smarce1	19.8502	1.7295
O08749	Dld	Dihydrolipoyl dehydrogenase, mitochondrial	Dld	24.147	0.298701			#N/A	A3KGS3	Ralgapa2	Ral GTPase-activating protein subunit alpha-2	Ralgapa2	17.6306	0.442599			#N/A	Q80UP3	Dgkz	Diacylglycerol kinase zeta	Dgkz	18.3256	0.499988		+		O54946	Dnajb6	DnaJ homolog subfamily B member 6	Dnajb6	19.4949	1.16658
O08756	Hsd17b10	3-hydroxyacyl-CoA dehydrogenase type-2	Hsd17b10	21.9399	0.548273			#N/A	A3KMP2	Ttc38	Tetratricopeptide repeat protein 38	Ttc38	20.8303	0.505768			#N/A	Q80UW8	Polr2e	DNA-directed RNA polymerases I, II, and III subunit RPABC1	Polr2e	20.4135	0.367008		+		O54950	Prkag1	5'-AMP-activated protein kinase subunit gamma-1	Prkag1	19.7604	0.382697
O08759	Ube3a	Ubiquitin-protein ligase E3A	Ube3a	19.7709	0.301017			#N/A	A6H584	Col6a5	Collagen alpha-5(VI) chain	Col6a5	19.0567	0.590374			#N/A	Q80YQ8	Rmnd5a	E3 ubiquitin-protein ligase RMND5A	Rmnd5a	18.5504	0.409084		+		O54962	Banf1	Barrier-to-autointegration factor	Banf1	21.3774	1.43492
O08788	Dctn1	Dynactin subunit 1	Dctn1	20.8724	0.152957			#N/A	A6H5Y3	Mtr	Methionine synthase	Mtr	17.7467	0.416101			#N/A	Q810D6	Grwd1	Glutamate-rich WD repeat-containing protein 1	Grwd1	18.7643	0.239738		+		O54974	Lgals7	Galectin-7	Lgals7	24.8124	1.17025
O08795	Prkcsh	Glucosidase 2 subunit beta	Prkcsh	22.7395	0.292003			#N/A	A6H5Z3	Exoc6b	Exocyst complex component 6B	Exoc6b	17.3191	0.443404			#N/A	Q8BGI5	Pex26	Peroxisome assembly protein 26	Pex26	18.4697	0.119794		+		O54984	Asna1	ATPase Asna1	Asna1	20.9186	0.593396
O08796	Eef2k	Eukaryotic elongation factor 2 kinase	Eef2k	19.9191	0.399967			#N/A	A6H611	Mipep	Mitochondrial intermediate peptidase	Mipep	18.4587	0.898201			#N/A	Q8BGR6	Arl15	ADP-ribosylation factor-like protein 15	Arl15	17.1516	0.505176		+		O54988	Slk	STE20-like serine/threonine-protein kinase	Slk	20.6497	0.234907
O08797	Serpinb9	SPI6	Serpinb9	18.8177	0.579208			#N/A	A6H6A9	Rabgap1l	Rab GTPase-activating protein 1-like	Rabgap1l	18.8931	1.31746			#N/A	Q8BH95	Echs1	Enoyl-CoA hydratase, mitochondrial	Echs1	22.2499	0.380925		+		O54992	Mapkapk5	MAP kinase-activated protein kinase 5	Mapkapk5	20.1577	1.67682
O08804	Serpinb6b	NK13	Serpinb6b	17.4237	0.979893			#N/A	A6X935	Itih4	Inter alpha-trypsin inhibitor, heavy chain 4	Itih4	17.4404	1.63956			#N/A	Q8BHD8	Pcmtd2	Protein-L-isoaspartate O-methyltransferase domain-containing protein 2	Pcmtd2	17.8897	0.404164		+		O55013	Trappc3	Trafficking protein particle complex subunit 3	Trappc3	21.7149	0.958632
O08807	Prdx4	Peroxiredoxin-4	Prdx4	24.2956	0.561478			#N/A	A6ZI47	Aldoart2	Fructose-bisphosphate aldolase	Aldoart2	20.3958	0.91024			#N/A	Q8BJ56	Pnpla2	Patatin-like phospholipase domain-containing protein 2	Pnpla2	17.5342	1.26504		+		O55022	Pgrmc1	Membrane-associated progesterone receptor component 1	Pgrmc1	22.534	0.381965
O08808	Diaph1	Protein diaphanous homolog 1	Diaph1	20.3321	0.263862			#N/A	A8DUK4	Hbb-bs	Beta-globin	Hbb-bs	25.7162	0.435539			#N/A	Q8BMK4	Ckap4	Cytoskeleton-associated protein 4	Ckap4	22.5871	0.365951		+		O55023	Impa1	Inositol monophosphatase 1	Impa1	22.0278	0.223288
O08810	Eftud2	116 kDa U5 small nuclear ribonucleoprotein component	Eftud2	20.851	0.213273			#N/A	A9JSM3	Tmem238	Transmembrane protein 238	Tmem238	18.5089	0.198035			#N/A	Q8BNU0	Armc6	Armadillo repeat-containing protein 6	Armc6	18.241	1.03413		+		O55026	Entpd2	Ectonucleoside triphosphate diphosphohydrolase 2	Entpd2	21.6587	0.885364
O08832	Galnt4	Polypeptide N-acetylgalactosaminyltransferase 4	Galnt4	19.8384	0.444143			#N/A	B1AQ75	Krt36	Keratin, type I cuticular Ha6	Krt36	18.1527	1.36037			#N/A	Q8BVI4	Qdpr	Dihydropteridine reductase	Qdpr	20.5294	0.659429		+		O55028	Bckdk	[3-methyl-2-oxobutanoate dehydrogenase [lipoamide]] kinase, mitochondrial	Bckdk	18.5043	1.11329
O08848	Trove2	60 kDa SS-A/Ro ribonucleoprotein	Trove2	18.2736	0.851557			#N/A	B1AR69	Myh13	Myosin, heavy polypeptide 13, skeletal muscle	Myh13	20.9581	1.21171			#N/A	Q8BYW1	Arhgap25	Rho GTPase-activating protein 25	Arhgap25	17.8467	0.288216		+		O55029	Copb2	Coatomer subunit beta'	Copb2	23.6453	0.301392
O08912	Galnt1	Polypeptide N-acetylgalactosaminyltransferase 1	Galnt1	19.0694	0.397327			#N/A	B1ART2	Vps13d	Vacuolar protein sorting 13D	Vps13d	18.5829	1.3158			#N/A	Q8C0D4	Arhgap12	Rho GTPase-activating protein 12	Arhgap12	17.2652	1.06991		+		O55033	Nck2	Cytoplasmic protein NCK2	Nck2	18.7412	1.66716
O08914	Faah	Fatty-acid amide hydrolase 1	Faah	17.7071	0.63886			#N/A	B1AUN2	Eif2b3	Eukaryotic translation initiation factor 2B, subunit 3	Eif2b3	19.8111	0.799077			#N/A	Q8C3J5	Dock2	Dedicator of cytokinesis protein 2	Dock2	17.9696	0.506014		+		O55091	Impact	Protein IMPACT	Impact	15.9239	1.43167
O08915	Aip	AH receptor-interacting protein	Aip	18.8238	0.159968			#N/A	B1AVH7	Tbc1d2	TBC1 domain family member 2A	Tbc1d2	19.0577	0.375299			#N/A	Q8C6B0	Mettl7a1	MCG20149, isoform CRA_a	Mettl7a1	20.9666	0.394769		+		O55101	Syngr2	Synaptogyrin-2	Syngr2	20.8783	0.697298
O08917	Flot1	Flotillin-1	Flot1	20.3128	0.253633			#N/A	B1AVK5	Col4a6	Collagen, type IV, alpha 6	Col4a6	17.9837	0.609693			#N/A	Q8C6G8	Wdr26	WD repeat-containing protein 26	Wdr26	19.3193	0.335961		+		O55106	Strn	Striatin	Strn	20.7915	0.764268
O08919	Numbl	Numb-like protein	Numbl	17.0143	0.129708			#N/A	B1AY13	Usp24	Ubiquitin carboxyl-terminal hydrolase 24	Usp24	18.4842	0.333229			#N/A	Q8C7K6	Pcyox1l	Prenylcysteine oxidase-like	Pcyox1l	17.7617	0.205707		+		O55111	Dsg2	Desmoglein-2	Dsg2	22.3572	0.879187
O08997	Atox1	Copper transport protein ATOX1	Atox1	22.4048	0.296377			#N/A	B1AYL1	Scn7a	Sodium channel protein	Scn7a	19.6207	0.379247			#N/A	Q8CBH5	Mfsd6	Major facilitator superfamily domain-containing protein 6	Mfsd6	19.0218	0.353366		+		O55125	Nipsnap1	Protein NipSnap homolog 1	Nipsnap1	22.1966	0.693504
O09012	Pex5	Peroxisomal targeting signal 1 receptor	Pex5	18.5057	0.520559			#N/A	B1AZA5	Tmem245	Transmembrane protein 245	Tmem245	18.7906	1.10059			#N/A	Q8CHP8	Pgp	Glycerol-3-phosphate phosphatase	Pgp	21.844	0.416533		+		O55126	Nipsnap2	Protein NipSnap homolog 2	Nipsnap2	21.6316	0.67403
O09044	Snap23	Synaptosomal-associated protein 23	Snap23	20.8545	0.512346			#N/A	B1AZI6	Thoc2	THO complex subunit 2	Thoc2	18.9503	0.448384			#N/A	Q8CHY6	Gatad2a	Transcriptional repressor p66 alpha	Gatad2a	19.4952	0.22355		+		O55128	Sap18	Histone deacetylase complex subunit SAP18	Sap18	21.2919	0.989607
O09061	Psmb1	Proteasome subunit beta type-1	Psmb1	23.455	0.434205			#N/A	B2RQG2	Phf3	PHD finger protein 3	Phf3	17.9459	0.647761			#N/A	Q8CIZ8	Vwf	von Willebrand factor	Vwf	20.0787	0.289416		+		O55131	2007-09-01	Septin-7	2007-09-01	22.9399	0.472162
O09106	Hdac1	Histone deacetylase 1	Hdac1	18.8905	0.18168			#N/A	B2RSH2	Gnai1	Guanine nucleotide-binding protein G(i) subunit alpha-1	Gnai1	18.8852	0.507528			#N/A	Q8K0J2	B3gnt7	UDP-GlcNAc:betaGal beta-1,3-N-acetylglucosaminyltransferase 7	B3gnt7	18.9106	1.17756		+		O55142	Rpl35a	60S ribosomal protein L35a	Rpl35a	22.6421	0.844487
O09110	Map2k3	Dual specificity mitogen-activated protein kinase kinase 3	Map2k3	20.5068	0.23295			#N/A	B2RX12	Abcc3	Canalicular multispecific organic anion transporter 2	Abcc3	20.1431	0.283163			#N/A	Q8K0Q5	Arhgap18	Rho GTPase-activating protein 18	Arhgap18	17.5256	0.51314		+		O55143	Atp2a2	Sarcoplasmic/endoplasmic reticulum calcium ATPase 2	Atp2a2	24.4202	0.387612
O09111	Ndufb11	NADH dehydrogenase [ubiquinone] 1 beta subcomplex subunit 11, mitochondrial	Ndufb11	21.1427	0.650694			#N/A	B2RXC1	Trappc11	Trafficking protein particle complex subunit 11	Trappc11	18.0709	0.43072			#N/A	Q8K157	Galm	Aldose 1-epimerase	Galm	19.7776	0.679772		+		O55201	Supt5h	Transcription elongation factor SPT5	Supt5h	20.1371	0.25186
O09117	Sypl1	Synaptophysin-like protein 1	Sypl1	20.4412	0.409764			#N/A	B2RXC2	Itpkb	Kinase	Itpkb	19.084	0.428907			#N/A	Q8K352	Sash3	SAM and SH3 domain-containing protein 3	Sash3	17.2415	0.161897		+		O55222	Ilk	Integrin-linked protein kinase	Ilk	21.9235	0.485117
O09131	Gsto1	Glutathione S-transferase omega-1	Gsto1	24.0683	0.217399			#N/A	B2RXC6	Polr3a	DNA-directed RNA polymerase subunit	Polr3a	17.0672	1.59772			#N/A	Q8K353	Cystm1	Cysteine-rich and transmembrane domain-containing protein 1	Cystm1	17.327	1.91218		+		O55229	Chkb	Choline/ethanolamine kinase	Chkb	18.371	0.236935
O09159	Man2b1	Lysosomal alpha-mannosidase	Man2b1	19.7311	0.643628			#N/A	B2RXR6	Ankrd44	Serine/threonine-protein phosphatase 6 regulatory ankyrin repeat subunit B	Ankrd44	18.1207	0.795384			#N/A	Q8K354	Cbr3	Carbonyl reductase [NADPH] 3	Cbr3	20.8837	0.665065		+		O55234	Psmb5	Proteasome subunit beta type-5	Psmb5	22.3917	0.295504
O09161	Casq2	Calsequestrin-2	Casq2	20.5734	1.22822			#N/A	B2RXS4	Plxnb2	Plexin-B2	Plxnb2	21.1758	0.441508			#N/A	Q8K3G9	Appl2	DCC-interacting protein 13-beta	Appl2	19.1673	0.4305		+		O55242	Sigmar1	Sigma non-opioid intracellular receptor 1	Sigmar1	20.2823	0.463606
O09164	Sod3	Extracellular superoxide dismutase [Cu-Zn]	Sod3	19.1773	0.282001			#N/A	B2RY56	Rbm25	RNA-binding protein 25	Rbm25	20.9055	0.379676			#N/A	Q8R1F1	Fam129b	Niban-like protein 1	Fam129b	21.1801	0.152535		+		O70133	Dhx9	ATP-dependent RNA helicase A	Dhx9	22.4051	0.381169
O09165	Casq1	Calsequestrin-1	Casq1	20.6203	1.80256			#N/A	B5THE2	Mgam	Maltase-glucoamylase	Mgam	19.3328	0.684324			#N/A	Q8R361	Rab11fip5	Rab11 family-interacting protein 5	Rab11fip5	19.2147	0.831224		+		O70152	Dpm1	Dolichol-phosphate mannosyltransferase subunit 1	Dpm1	21.0905	1.13907
O09167	Rpl21	60S ribosomal protein L21	Rpl21	22.2082	0.598407			#N/A	B5X0E4	Abcb5	ATP-binding cassette sub-family B member 5	Abcb5	17.8805	0.663871			#N/A	Q8R3T5	Stxbp6	Syntaxin-binding protein 6	Stxbp6	19.4836	0.145707		+		O70172	Pip4k2a	Phosphatidylinositol 5-phosphate 4-kinase type-2 alpha	Pip4k2a	20.8367	0.519751
O09172	Gclm	Glutamate--cysteine ligase regulatory subunit	Gclm	20.719	0.250237			#N/A	B7ZMP1	Xpnpep3	Xaa-Pro aminopeptidase 3	Xpnpep3	17.0382	0.121555			#N/A	Q8R570	Snap47	Synaptosomal-associated protein 47	Snap47	17.8565	0.35829		+		O70194	Eif3d	Eukaryotic translation initiation factor 3 subunit D	Eif3d	21.3753	0.477224
O09174	Amacr	Alpha-methylacyl-CoA racemase	Amacr	18.1991	0.370956			#N/A	B8ZXI1	Qtrt2	Queuine tRNA-ribosyltransferase accessory subunit 2	Qtrt2	17.0513	1.02304			#N/A	Q8R5A0	Smyd2	N-lysine methyltransferase SMYD2	Smyd2	17.5061	0.7611		+		O70200	Aif1	Allograft inflammatory factor 1	Aif1	19.7757	1.05015
O35071	Kif1c	Kinesin-like protein KIF1C	Kif1c	19.6094	0.596621			#N/A	B9EJ80	Pdzd8	PDZ domain-containing protein 8	Pdzd8	18.5425	0.700191			#N/A	Q8VBW1	Slc6a8	Sodium- and chloride-dependent creatine transporter 1	Slc6a8	18.3747	0.457339		+		O70209	Pdlim3	PDZ and LIM domain protein 3	Pdlim3	23.8398	0.436011
O35074	Ptgis	Prostacyclin synthase	Ptgis	21.2055	0.385177			#N/A	B9EJ86	Osbpl8	Oxysterol-binding protein-related protein 8	Osbpl8	19.8368	0.80489			#N/A	Q8VCB1	Ndc1	Nucleoporin NDC1	Ndc1	18.2668	0.410184		+		O70228	Atp9a	Probable phospholipid-transporting ATPase IIA	Atp9a	19.2831	0.501322
O35075	Dscr3	Down syndrome critical region protein 3 homolog	Dscr3	19.852	0.32419			#N/A	B9EJR8	Dnaaf5	Dynein assembly factor 5, axonemal	Dnaaf5	18.118	0.52386			#N/A	Q8VCG1	Dut	Deoxyuridine triphosphatase	Dut	20.3782	0.832108		+		O70250	Pgam2	Phosphoglycerate mutase 2	Pgam2	21.3471	1.26619
O35083	Agpat1	1-acyl-sn-glycerol-3-phosphate acyltransferase alpha	Agpat1	19.4398	0.270855			#N/A	B9EKI3	Tmf1	TATA element modulatory factor	Tmf1	19.0192	0.199238			#N/A	Q8VCI0	Plbd1	Phospholipase B-like 1	Plbd1	19.5502	0.26448		+		O70251	Eef1b	Elongation factor 1-beta	Eef1b	22.4665	0.928152
O35114	Scarb2	Lysosome membrane protein 2	Scarb2	19.439	0.547034			#N/A	C0HKD8;C0HKD9	Mfap1a;Mfap1b	Microfibrillar-associated protein 1A	Mfap1a	19.6972	0.520466			#N/A	Q8VD57	Sft2d2	Vesicle transport protein SFT2B	Sft2d2	17.5008	0.588748		+		O70252	Hmox2	Heme oxygenase 2	Hmox2	20.4068	0.829743
O35129	Phb2	Prohibitin-2	Phb2	23.1935	0.140962			#N/A	C0HKE1;C0HKE2;C0HKE3;C0HKE4;C0HKE5;C0HKE6;C0HKE7;C0HKE8;C0HKE9;Q8BFU2;Q8CGP5;Q8CGP6;Q8CGP7	Hist1h2ab;Hist1h2ac;Hist1h2ad;Hist1h2ae;Hist1h2af;Hist1h2ag;Hist1h2ah;Hist1h2ai;Hist1h2ak;Hist1h2an;Hist1h2ao;Hist1h2ap;Hist3h2a	Histone H2A type 1-B	Hist1h2ab	29.3906	0.258021			#N/A	Q8VD66	Abhd4	Protein ABHD4	Abhd4	17.5875	0.383919		+		O70258	Sgce	Epsilon-sarcoglycan	Sgce	20.0778	0.621925
O35136	Ncam2	Neural cell adhesion molecule 2	Ncam2	19.0388	0.0671506			#N/A	D3YU50	Mybpc1	Myosin-binding protein C, slow-type	Mybpc1	23.1089	0.805425			#N/A	Q8VD75	Hip1	Huntingtin-interacting protein 1	Hip1	18.7624	1.23632		+		O70274	Ptp4a2	Protein tyrosine phosphatase type IVA 2	Ptp4a2	19.8079	1.05235
O35143	ATP5IF1	ATPase inhibitor, mitochondrial	ATP5IF1	20.973	1.724			#N/A	D3YX43	Vsig10	V-set and immunoglobulin domain-containing protein 10	Vsig10	20.2632	0.730767			#N/A	Q8VDN2	Atp1a1	Sodium/potassium-transporting ATPase subunit alpha-1	Atp1a1	25.1713	0.419866		+		O70305	Atxn2	Ataxin-2	Atxn2	19.1395	0.525419
O35153	Bet1l	BET1-like protein	Bet1l	17.8373	0.27582			#N/A	D3YXJ5	Fam84b	Family with sequence similarity 84, member B	Fam84b	18.6227	0.849586			#N/A	Q8VDP3	Mical1	[F-actin]-monooxygenase MICAL1	Mical1	21.4136	0.183313		+		O70310	Nmt1	Glycylpeptide N-tetradecanoyltransferase 1	Nmt1	21.0361	0.388427
O35206	Col15a1	Collagen alpha-1(XV) chain	Col15a1	21.5624	0.391492			#N/A	D3YXK1	Samd1	Atherin	Samd1	16.9958	1.9215			#N/A	Q8VEG6	Cnot6l	CCR4-NOT transcription complex subunit 6-like	Cnot6l	18.4929	0.356761		+		O70318	Epb41l2	Band 4.1-like protein 2	Epb41l2	22.5304	0.982083
O35215	Ddt	D-dopachrome decarboxylase	Ddt	22.4283	0.408615			#N/A	D3YZP9	Ccdc6	Coiled-coil domain-containing protein 6	Ccdc6	18.9353	0.593141			#N/A	Q91VH2	Snx9	Sorting nexin-9	Snx9	21.2326	0.147484		+		O70325	Gpx4	Phospholipid hydroperoxide glutathione peroxidase	Gpx4	20.3372	0.578135
O35216	Cenpa	Histone H3-like centromeric protein A	Cenpa	18.3896	1.70398			#N/A	D3YZZ5	Tmed7	Transmembrane p24-trafficking protein 7	Tmed7	19.7975	0.708977			#N/A	Q91VI7	Rnh1	Ribonuclease inhibitor	Rnh1	24.2693	0.129145		+		O70326	Grem1	Gremlin-1	Grem1	18.2618	1.07446
O35218	Cpsf2	Cleavage and polyadenylation specificity factor subunit 2	Cpsf2	18.6338	0.285834			#N/A	D3Z0M9	Ddx23	DEAD (Asp-Glu-Ala-Asp) box polypeptide 23	Ddx23	19.5939	0.596486			#N/A	Q91VK1	Bzw2	Basic leucine zipper and W2 domain-containing protein 2	Bzw2	21.642	0.165037		+		O70370	Ctss	Cathepsin S	Ctss	21.5434	0.835176
O35226	Psmd4	26S proteasome non-ATPase regulatory subunit 4	Psmd4	21.0364	0.464594			#N/A	D3Z286	Tmppe	Transmembrane protein with metallophosphoesterase domain	Tmppe	19.6875	1.3136			#N/A	Q91WC9	Daglb	Sn1-specific diacylglycerol lipase beta	Daglb	18.8126	0.450217		+		O70378	Emc8	ER membrane protein complex subunit 8	Emc8	21.3059	0.667132
O35250	Exoc7	Exocyst complex component 7	Exoc7	18.4068	0.46962			#N/A	D3Z2H9	Tpm3-rs7	Uncharacterized protein	Tpm3-rs7	23.4759	0.452567			#N/A	Q91WG4	Elp2	Elongator complex protein 2	Elp2	19.3034	0.40263		+		O70400	Pdlim1	PDZ and LIM domain protein 1	Pdlim1	23.1488	1.05306
O35286	Dhx15	Pre-mRNA-splicing factor ATP-dependent RNA helicase DHX15	Dhx15	20.7472	0.201661			#N/A	D3Z3L3	Trim12c	Tripartite motif-containing 12C	Trim12c	18.8487	1.17412			#N/A	Q91XC8	Dap	Death-associated protein 1	Dap	21.6174	0.613362		+		O70404	Vamp8	Vesicle-associated membrane protein 8	Vamp8	20.6259	0.210057
O35295	Purb	Transcriptional activator protein Pur-beta	Purb	22.05	0.294043			#N/A	D3Z3N4	Hnrnph3	Heterogeneous nuclear ribonucleoprotein H3	Hnrnph3	19.9859	0.360579			#N/A	Q91Y74	St3gal4	CMP-N-acetylneuraminate-beta-galactosamide-alpha-2,3-sialyltransferase 4	St3gal4	17.9492	0.888974		+		O70421	Fzd1	Frizzled-1	Fzd1	20.0046	1.04029
O35326	Srsf5	Serine/arginine-rich splicing factor 5	Srsf5	20.0484	1.03334			#N/A	D3Z4S3	Ptrhd1	Putative peptidyl-tRNA hydrolase PTRHD1	Ptrhd1	18.9897	0.208604			#N/A	Q921E2	Rab31	Ras-related protein Rab-31	Rab31	17.1902	0.617898		+		O70423	Aoc3	Membrane primary amine oxidase	Aoc3	23.7432	0.611314
O35343	Kpna4	Importin subunit alpha-3	Kpna4	17.9468	0.288317			#N/A	D3Z6V6	Enpp7	Ectonucleotide pyrophosphatase/phosphodiesterase 7	Enpp7	17.7391	0.826453			#N/A	Q922J3	Clip1	CAP-Gly domain-containing linker protein 1	Clip1	19.2458	0.236387		+		O70433	Fhl2	Four and a half LIM domains protein 2	Fhl2	19.9726	0.612323
O35345	Kpna6	Importin subunit alpha-7	Kpna6	18.0466	0.949369			#N/A	D3Z7X0	Acad12	Acyl-Coenzyme A dehydrogenase family, member 12	Acad12	20.4289	0.77874			#N/A	Q99J09	Wdr77	Methylosome protein 50	Wdr77	19.8555	0.171572		+		O70435	Psma3	Proteasome subunit alpha type-3	Psma3	22.7403	0.770052
O35350	Capn1	Calpain-1 catalytic subunit	Capn1	21.6586	0.136987			#N/A	D4AFX7	Dnajc13	DnaJ heat shock protein family (Hsp40) member C13	Dnajc13	19.92	0.201783			#N/A	Q99JW2	Acy1	Aminoacylase-1	Acy1	20.2506	0.482454		+		O70439	Stx7	Syntaxin-7	Stx7	19.9506	0.520255
O35375	Nrp2	Neuropilin-2	Nrp2	19.3573	0.272262			#N/A	E9PUR0	Ankhd1	Ankyrin repeat and KH domain-containing 1	Ankhd1	18.33	1.03819			#N/A	Q99JY0	Hadhb	Trifunctional enzyme subunit beta, mitochondrial	Hadhb	23.9532	0.224577		+		O70456	Sfn	14-3-3 protein sigma	Sfn	22.8405	0.69732
O35379	Abcc1	Multidrug resistance-associated protein 1	Abcc1	19.6031	0.650074			#N/A	E9PV24	Fga	Fibrinogen alpha chain	Fga	21.7823	0.441767			#N/A	Q99K85	Psat1	Phosphoserine aminotransferase	Psat1	20.9599	0.397956		+		O70475	Ugdh	UDP-glucose 6-dehydrogenase	Ugdh	22.7822	0.53732
O35381	Anp32a	Acidic leucine-rich nuclear phosphoprotein 32 family member A	Anp32a	23.9834	0.252717			#N/A	E9PV38	Ces2g	Carboxylic ester hydrolase	Ces2g	18.7857	0.70629			#N/A	Q99LR1	Abhd12	Monoacylglycerol lipase ABHD12	Abhd12	19.6836	0.201582		+		O70492	Snx3	Sorting nexin-3	Snx3	21.8414	0.947501
O35382	Exoc4	Exocyst complex component 4	Exoc4	19.4022	0.66833			#N/A	E9PVA8	Gcn1	eIF-2-alpha kinase activator GCN1	Gcn1	20.7064	0.440413			#N/A	Q99LS3	Psph	Phosphoserine phosphatase	Psph	19.6349	0.557126		+		O70493	Snx12	Sorting nexin-12	Snx12	21.6758	0.4737
O35386	Phyh	Phytanoyl-CoA dioxygenase, peroxisomal	Phyh	18.9938	0.171402			#N/A	E9PVG8	9530053A07Rik	RIKEN cDNA 9530053A07 gene	9530053A07Rik	19.8331	0.374897			#N/A	Q9CQ73	Pkp2	Plakophilin 2	Pkp2	19.6671	0.573961		+		O70503	Hsd17b12	Very-long-chain 3-oxoacyl-CoA reductase	Hsd17b12	20.6196	0.422026
O35400	Sult2b1	Sulfotransferase family cytosolic 2B member 1	Sult2b1	18.9204	0.52377			#N/A	E9PVX6	Mki67	Proliferation marker protein Ki-67	Mki67	18.8376	0.619997			#N/A	Q9CQF3	Nudt21	Cleavage and polyadenylation specificity factor subunit 5	Nudt21	20.0013	0.331663		+		O70551	Srpk1	SRSF protein kinase 1	Srpk1	19.9739	0.447911
O35405	Pld3	Phospholipase D3	Pld3	20.114	0.587386			#N/A	E9PVZ8	Golgb1	Golgi autoantigen, golgin subfamily b, macrogolgin 1	Golgb1	19.7612	0.442083			#N/A	Q9CQF9	Pcyox1	Prenylcysteine oxidase	Pcyox1	19.8396	0.145355		+		O70566	Diaph2	Protein diaphanous homolog 2	Diaph2	18.2081	0.528428
O35425	Bok	Bcl-2-related ovarian killer protein	Bok	18.1357	0.271832			#N/A	E9PWP7	Muc3	Mucin 3, intestinal	Muc3	19.1935	0.861734			#N/A	Q9CR57	Rpl14	60S ribosomal protein L14	Rpl14	21.6134	0.436173		+		O70570	Pigr	Polymeric immunoglobulin receptor	Pigr	22.4639	1.04524
O35435	Dhodh	Dihydroorotate dehydrogenase (quinone), mitochondrial	Dhodh	19.8888	0.48613			#N/A	E9PWP9	4931408C20Rik	RIKEN cDNA 4931408C20 gene	4931408C20Rik	20.2622	0.587174			#N/A	Q9CWJ9	Atic	Bifunctional purine biosynthesis protein PURH	Atic	22.6727	0.102773		+		O70572	Smpd2	Sphingomyelin phosphodiesterase 2	Smpd2	19.8181	0.371637
O35452	Tnxb	Tenascin X	Tnxb	22.4672	0.293214			#N/A	E9PWQ3	Col6a3	Collagen, type VI, alpha 3	Col6a3	25.8785	0.483449			#N/A	Q9CY66	Gar1	H/ACA ribonucleoprotein complex subunit 1	Gar1	20.9039	0.455547		+		O70589	Cask	Peripheral plasma membrane protein CASK	Cask	19.3218	0.628976
O35459	Ech1	Delta(3,5)-Delta(2,4)-dienoyl-CoA isomerase, mitochondrial	Ech1	20.8723	0.454774			#N/A	E9PWZ3	Rpl3l	Ribosomal protein L3-like	Rpl3l	18.484	2.24526			#N/A	Q9CZV8	Fbxl20	F-box/LRR-repeat protein 20	Fbxl20	17.0136	1.09725		+		O70591	Pfdn2	Prefoldin subunit 2	Pfdn2	20.8244	0.483575
O35465	Fkbp8	Peptidyl-prolyl cis-trans isomerase FKBP8	Fkbp8	18.633	0.301656			#N/A	E9PX95	Abca17	ATP-binding cassette sub-family A member 17	Abca17	19.3115	1.77663			#N/A	Q9D0K2	Oxct1	Succinyl-CoA:3-ketoacid coenzyme A transferase 1, mitochondrial	Oxct1	21.4485	0.400633		+		O88207	Col5a1	Collagen alpha-1(V) chain	Col5a1	22.7649	0.75156
O35492	Clk3	Dual specificity protein kinase CLK3	Clk3	16.4564	1.09866			#N/A	E9PY03	Tstd1	Thiosulfate sulfurtransferase (rhodanese)-like domain-containing 1	Tstd1	20.4532	0.442766			#N/A	Q9D1T5	Prr15	Proline-rich protein 15	Prr15	18.8786	0.606497		+		O88271	Cfdp1	Craniofacial development protein 1	Cfdp1	19.9335	0.702583
O35551	Rabep1	Rab GTPase-binding effector protein 1	Rabep1	18.0965	0.569075			#N/A	E9PY16	Adap1	ArfGAP with dual PH domains 1	Adap1	17.6973	1.18499			#N/A	Q9D379	Ephx1	Epoxide hydrolase 1	Ephx1	21.9956	0.266411		+		O88286	Wiz	Protein Wiz	Wiz	17.7395	1.22287
O35593	Psmd14	26S proteasome non-ATPase regulatory subunit 14	Psmd14	21.7928	0.830291			#N/A	E9PYB0	Ahnak2	AHNAK nucleoprotein 2 (Fragment)	Ahnak2	21.1797	1.4741			#N/A	Q9D4H7	Lonrf3	LON peptidase N-terminal domain and RING finger protein 3	Lonrf3	19.2137	1.14289		+		O88291	Znf326	DBIRD complex subunit ZNF326	Znf326	18.8827	0.701909
O35598	Adam10	Disintegrin and metalloproteinase domain-containing protein 10	Adam10	20.8491	0.108086			#N/A	E9PYD1	Fam98c	Family with sequence similarity 98, member C	Fam98c	20.4559	0.386524			#N/A	Q9D7G0	Prps1	Ribose-phosphate pyrophosphokinase 1	Prps1	20.5095	0.25654		+		O88307	Sorl1	Sortilin-related receptor	Sorl1	19.6735	0.194212
O35601	Fyb1	FYN-binding protein 1	Fyb1	17.1746	0.845998			#N/A	E9PYF4	Lmo7	LIM domain only 7	Lmo7	21.7484	0.146269			#N/A	Q9D7X3	Dusp3	Dual specificity protein phosphatase 3	Dusp3	19.8902	0.543017		+		O88312	Agr2	Anterior gradient protein 2 homolog	Agr2	26.7209	1.08984
O35604	Npc1	NPC intracellular cholesterol transporter 1	Npc1	16.4421	0.381705			#N/A	E9PYF7	Ap1ar	AP1AR	Ap1ar	17.3929	0.642527			#N/A	Q9D8U8	Snx5	Sorting nexin-5	Snx5	20.2632	0.283842		+		O88322	Nid2	Nidogen-2	Nid2	21.3614	0.566214
O35609	Scamp3	Secretory carrier-associated membrane protein 3	Scamp3	19.2267	0.599324			#N/A	E9PYK3	Parp4	Poly [ADP-ribose] polymerase	Parp4	19.2972	0.428674			#N/A	Q9DBS5	Klc4	Kinesin light chain 4	Klc4	19.9464	0.336969		+		O88325	Naglu	Alpha-N-acetylglucosaminidase	Naglu	19.0248	0.405235
O35638	Stag2	Cohesin subunit SA-2	Stag2	18.7032	0.232078			#N/A	E9PYP2	Nbeal1	Neurobeachin-like 1	Nbeal1	18.5086	0.595717			#N/A	Q9DBT5	Ampd2	AMP deaminase 2	Ampd2	19.8591	0.357431		+		O88327	Ctnnal1	Alpha-catulin	Ctnnal1	19.3162	0.136538
O35639	Anxa3	Annexin A3	Anxa3	24.0307	0.224499			#N/A	E9PZM4	Chd2	Chromodomain-helicase-DNA-binding protein 2	Chd2	17.0781	1.40064			#N/A	Q9DC11	Plxdc2	Plexin domain-containing protein 2	Plxdc2	18.7937	0.58194		+		O88329	Myo1a	Unconventional myosin-Ia	Myo1a	22.2008	1.10662
O35640	Anxa8	Annexin A8	Anxa8	19.6805	0.300265			#N/A	E9PZM7	Scaf11	SR-related CTD-associated factor 11	Scaf11	18.3744	0.48232			#N/A	Q9DCL9	Paics	Multifunctional protein ADE2	Paics	21.4555	0.101709		+		O88342	Wdr1	WD repeat-containing protein 1	Wdr1	24.2967	0.358314
O35643	Ap1b1	AP-1 complex subunit beta-1	Ap1b1	21.6418	0.358449			#N/A	E9Q0B5	Fcgbp	Fc fragment of IgG-binding protein	Fcgbp	24.8475	0.287208			#N/A	Q9DCZ1	Gmpr	GMP reductase 1	Gmpr	19.7504	0.580551		+		O88343	Slc4a4	Electrogenic sodium bicarbonate cotransporter 1	Slc4a4	19.6651	0.318568
O35654	Pold2	DNA polymerase delta subunit 2	Pold2	17.7088	0.578713			#N/A	E9Q0F0	Krt78	Keratin 78	Krt78	21.3878	1.46847			#N/A	Q9EQ08	Sgsh	Heparan N-sulfatase	Sgsh	16.4329	2.17072		+		O88351	Ikbkb	Inhibitor of nuclear factor kappa-B kinase subunit beta	Ikbkb	19.7842	0.203916
O35660	Gstm6	Glutathione S-transferase Mu 6	Gstm6	16.0206	1.8208			#N/A	E9Q137	Tex264	Testis-expressed gene 264	Tex264	19.2041	0.879317			#N/A	Q9EQI5	Ppbp	Chemokine (C-X-C motif) ligand 7, isoform CRA_b	Ppbp	17.7675	0.297951		+		O88384	Vti1b	Vesicle transport through interaction with t-SNAREs homolog 1B	Vti1b	20.5168	0.601344
O35680	Mrps12	28S ribosomal protein S12, mitochondrial	Mrps12	17.631	1.42907			#N/A	E9Q166	Atad2b	ATPase family, AAA domain-containing 2B	Atad2b	20.7377	0.96148			#N/A	Q9ES52	Inpp5d	Phosphatidylinositol 3,4,5-trisphosphate 5-phosphatase 1	Inpp5d	19.0107	0.612827		+		O88441	Mtx2	Metaxin-2	Mtx2	19.2336	0.704391
O35682	Myadm	Myeloid-associated differentiation marker	Myadm	19.7697	0.331849			#N/A	E9Q1F5	Myo5c	Myosin VC	Myo5c	18.9562	0.402482			#N/A	Q9ES70	Nek6	Serine/threonine-protein kinase Nek6	Nek6	18.0158	0.207546		+		O88447	Klc1	Kinesin light chain 1	Klc1	18.785	1.1581
O35685	Nudc	Nuclear migration protein nudC	Nudc	21.0075	0.324916			#N/A	E9Q1P8	Irf2bp2	Interferon regulatory factor 2-binding protein 2	Irf2bp2	20.1376	1.10857			#N/A	Q9ESX5	Dkc1	H/ACA ribonucleoprotein complex subunit DKC1	Dkc1	21.2846	0.103637		+		O88448	Klc2	Kinesin light chain 2	Klc2	19.5756	0.345021
O35691	Pnn	Pinin	Pnn	20.0908	1.08228			#N/A	E9Q1W3	Neb	Nebulin	Neb	22.8861	0.812532			#N/A	Q9ESZ8	Gtf2i	General transcription factor II-I	Gtf2i	19.901	0.158799		+		O88456	Capns1	Calpain small subunit 1	Capns1	21.6189	0.473546
O35704	Sptlc1	Serine palmitoyltransferase 1	Sptlc1	19.5317	0.505623			#N/A	E9Q2E4	Hectd4	HECT domain E3 ubiquitin protein ligase 4	Hectd4	16.8751	1.24757			#N/A	Q9ET30	Tm9sf3	Transmembrane 9 superfamily member 3	Tm9sf3	19.6502	0.206539		+		O88487	Dync1i2	Cytoplasmic dynein 1 intermediate chain 2	Dync1i2	23.0972	0.63702
O35730	Ring1	E3 ubiquitin-protein ligase RING1	Ring1	18.5337	0.134299			#N/A	E9Q394	Akap13	A-kinase anchor protein 13	Akap13	19.1147	0.58353			#N/A	Q9JJD0	Thap11	THAP domain-containing protein 11	Thap11	18.477	1.24206		+		O88492	Plin4	Perilipin-4	Plin4	20.3885	0.444893
O35737	Hnrnph1	Heterogeneous nuclear ribonucleoprotein H	Hnrnph1	22.8711	0.168959			#N/A	E9Q3E1	Aldh3b2	Aldehyde dehydrogenase family 3 member B2	Aldh3b2	16.9751	1.54633			#N/A	Q9JJG0	Tacc2	Transforming acidic coiled-coil-containing protein 2	Tacc2	19.186	0.336842		+		O88512	Ap1g2	AP-1 complex subunit gamma-like 2	Ap1g2	19.8987	0.83053
O35841	Api5	Apoptosis inhibitor 5	Api5	20.8089	0.23708			#N/A	E9Q3G8	Nup153	Nucleoporin 153	Nup153	19.1501	0.670962			#N/A	Q9JJZ2	Tuba8	Tubulin alpha-8 chain	Tuba8	19.9748	0.819863		+		O88520	Shoc2	Leucine-rich repeat protein SHOC-2	Shoc2	18.9856	0.484682
O35855	Bcat2	Branched-chain-amino-acid aminotransferase, mitochondrial	Bcat2	21.32	0.38899			#N/A	E9Q3H6	Coq10a	Coenzyme Q10A	Coq10a	18.1293	0.837585			#N/A	Q9JL62	Gltp	Glycolipid transfer protein	Gltp	19.2617	0.409299		+		O88531	Ppt1	Palmitoyl-protein thioesterase 1	Ppt1	18.4987	0.788357
O35857	Timm44	Mitochondrial import inner membrane translocase subunit TIM44	Timm44	20.0867	0.337364			#N/A	E9Q3L2	Pi4ka	Phosphatidylinositol 4-kinase alpha	Pi4ka	20.4081	0.638304			#N/A	Q9JLM8	Dclk1	Serine/threonine-protein kinase DCLK1	Dclk1	19.123	0.6016		+		O88532	Zfr	Zinc finger RNA-binding protein	Zfr	18.3307	0.663548
O35864	Cops5	COP9 signalosome complex subunit 5	Cops5	20.4858	0.416585			#N/A	E9Q409	Prss32	Protease, serine 32	Prss32	20.0783	0.714032			#N/A	Q9JMG3	Tmub1	Transmembrane and ubiquitin-like domain-containing protein 1	Tmub1	18.8829	0.361844		+		O88533	Ddc	Aromatic-L-amino-acid decarboxylase	Ddc	18.6182	0.629944
O35887	Calu	Calumenin	Calu	22.7512	0.757611			#N/A	E9Q411	Nbas	Neuroblastoma-amplified sequence	Nbas	18.3404	0.603696			#N/A	Q9QX60	Dguok	Deoxyguanosine kinase, mitochondrial	Dguok	20.4048	0.151794		+		O88543	Cops3	COP9 signalosome complex subunit 3	Cops3	21.3487	0.134293
O35900	Lsm2	U6 snRNA-associated Sm-like protein LSm2	Lsm2	19.7216	0.902209			#N/A	E9Q4N7	Arid1b	AT-rich interactive domain-containing protein 1B	Arid1b	18.8508	0.917823			#N/A	Q9QXE0	Hacl1	2-hydroxyacyl-CoA lyase 1	Hacl1	18.8216	0.751011		+		O88544	Cops4	COP9 signalosome complex subunit 4	Cops4	21.2481	0.371601
O35943	Fxn	Frataxin, mitochondrial	Fxn	17.9539	0.115552			#N/A	E9Q4Z2	Acacb	Acetyl-CoA carboxylase 2	Acacb	18.2791	0.979406			#N/A	Q9QXH4	Itgax	Integrin alpha-X	Itgax	17.7172	0.192045		+		O88545	Cops6	COP9 signalosome complex subunit 6	Cops6	20.7867	0.624057
O35945	Aldh1a7	Aldehyde dehydrogenase, cytosolic 1	Aldh1a7	19.376	0.802637			#N/A	E9Q512	Trip11	Thyroid hormone receptor interactor 11	Trip11	18.8601	0.626871			#N/A	Q9QXS1	Plec	Plectin	Plec	24.4466	0.134148		+		O88569	Hnrnpa2b1	Heterogeneous nuclear ribonucleoproteins A2/B1	Hnrnpa2b1	24.9061	0.270714
O35963	Rab33b	Ras-related protein Rab-33B	Rab33b	17.2502	0.705524			#N/A	E9Q555	Rnf213	E3 ubiquitin-protein ligase RNF213	Rnf213	19.381	0.710044			#N/A	Q9QXX4	Slc25a13	Calcium-binding mitochondrial carrier protein Aralar2	Slc25a13	19.3609	0.505241		+		O88587	Comt	Catechol O-methyltransferase	Comt	20.2974	0.92499
O35969	Gamt	Guanidinoacetate N-methyltransferase	Gamt	18.8494	0.692245			#N/A	E9Q557	Dsp	Desmoplakin	Dsp	22.9179	0.614608			#N/A	Q9QYB5	Add3	Gamma-adducin	Add3	21.8784	0.206085		+		O88593	Pglyrp1	Peptidoglycan recognition protein 1	Pglyrp1	21.2308	0.73603
O35972	Mrpl23	39S ribosomal protein L23, mitochondrial	Mrpl23	18.8233	0.196658			#N/A	E9Q634	Myo1e	Unconventional myosin-Ie	Myo1e	20.1883	0.699465			#N/A	Q9QZF2	Gpc1	Glypican-1	Gpc1	17.7638	0.790679		+		O88643	Pak1	Serine/threonine-protein kinase PAK 1	Pak1	18.8035	1.59529
O35988	Sdc4	Syndecan-4	Sdc4	19.9527	1.0043			#N/A	E9Q6E5	Srsf11	Serine/arginine-rich-splicing factor 11	Srsf11	17.9617	0.998672			#N/A	Q9QZK2	Bcar3	Breast cancer anti-estrogen resistance protein 3	Bcar3	17.9091	0.457403		+		O88685	Psmc3	26S proteasome regulatory subunit 6A	Psmc3	21.1978	0.591152
O54692	Zw10	Centromere/kinetochore protein zw10 homolog	Zw10	16.8344	0.435368			#N/A	E9Q6H8	Plekha5	Pleckstrin homology domain-containing, family A member 5	Plekha5	20.123	0.496893			#N/A	Q9R045	Angptl2	Angiopoietin-related protein 2	Angptl2	17.1557	0.603611		+		O88696	Clpp	ATP-dependent Clp protease proteolytic subunit, mitochondrial	Clpp	21.722	0.680265
O54724	Cavin1	Caveolae-associated protein 1	Cavin1	24.01	0.560407			#N/A	E9Q6R7	Utrn	Utrophin	Utrn	20.3933	0.617049			#N/A	Q9R0Y5	Ak1	Adenylate kinase isoenzyme 1	Ak1	21.141	1.13969		+		O88712	Ctbp1	C-terminal-binding protein 1	Ctbp1	20.3328	0.596924
O54734	Ddost	Dolichyl-diphosphooligosaccharide--protein glycosyltransferase 48 kDa subunit	Ddost	22.7375	0.433779			#N/A	E9Q735	Ube4a	Ubiquitin conjugation factor E4 A	Ube4a	18.6336	0.518732			#N/A	Q9R111	Gda	Guanine deaminase	Gda	21.2602	0.277885		+		O88735	Map7	Ensconsin	Map7	19.7021	0.593014
O54774	Ap3d1	AP-3 complex subunit delta-1	Ap3d1	19.7294	0.368743			#N/A	E9Q784	Zc3h13	Zinc finger CCCH domain-containing protein 13	Zc3h13	17.8953	0.24912			#N/A	Q9WU03	Spint2	Kunitz-type protease inhibitor 2	Spint2	19.4513	0.601958		+		O88738	Birc6	Baculoviral IAP repeat-containing protein 6	Birc6	19.0501	0.503366
O54782	Man2b2	Epididymis-specific alpha-mannosidase	Man2b2	19.1691	0.226621			#N/A	E9Q7P9	Cdhr2	Cadherin-related family member 2	Cdhr2	19.9758	0.779584			#N/A	Q9WUA3	Pfkp	ATP-dependent 6-phosphofructokinase, platelet type	Pfkp	23.6395	0.229626		+		O88746	Tom1	Target of Myb protein 1	Tom1	20.5068	0.812055
O54784	Dapk3	Death-associated protein kinase 3	Dapk3	19.2901	0.443925			#N/A	E9Q8T7	Dnah1	Dynein heavy chain 1, axonemal	Dnah1	20.6577	0.880831			#N/A	Q9WUK4	Rfc2	Replication factor C subunit 2	Rfc2	19.484	0.243892		+		O88811	Stam2	Signal transducing adapter molecule 2	Stam2	19.3411	0.350827
O54785	Limk2	LIM domain kinase 2	Limk2	19.5937	0.418001			#N/A	E9Q912	Rap1gds1	RAP1, GTP-GDP dissociation stimulator 1	Rap1gds1	19.4194	0.53898			#N/A	Q9WUM4	Coro1c	Coronin-1C	Coro1c	22.6098	0.253159		+		O88851	Rbbp9	Putative hydrolase RBBP9	Rbbp9	19.5243	0.689263
O54786	Dffa	DNA fragmentation factor subunit alpha	Dffa	18.0732	0.581405			#N/A	E9Q9B7	Kidins220	Kinase D-interacting substrate 220	Kidins220	16.2072	1.22622			#N/A	Q9WVA2	Timm8a1	Mitochondrial import inner membrane translocase subunit Tim8 A	Timm8a1	18.4511	0.586506		+		O88874	Ccnk	Cyclin-K	Ccnk	18.5759	0.266777
O54824	Il16	Pro-interleukin-16	Il16	17.7353	1.40034			#N/A	E9Q9K5	Trdn	Triadin	Trdn	19.9502	0.942636			#N/A	Q9Z1G4	Atp6v0a1	V-type proton ATPase 116 kDa subunit a isoform 1	Atp6v0a1	19.1972	0.525291		+		O88879	Apaf1	Apoptotic protease-activating factor 1	Apaf1	19.1608	1.13384
O54833	Csnk2a2	Casein kinase II subunit alpha'	Csnk2a2	20.1586	0.153818			#N/A	E9QA15	Cald1	Caldesmon 1	Cald1	25.0126	0.433373			#N/A	Q9Z2S7	Tsc22d3	TSC22 domain family protein 3	Tsc22d3	17.9955	0.477846		+		O88895	Hdac3	Histone deacetylase 3	Hdac3	17.0258	0.540024
O54865	Gucy1b1	Guanylate cyclase soluble subunit beta-1	Gucy1b1	18.8111	0.593203			#N/A	E9QAE3	Btaf1	B-TFIID TATA-box-binding protein-associated factor 1	Btaf1	17.3368	0.681722			#N/A	A0A087WQ44	Srcap	Snf2-related CREBBP activator protein	Srcap	17.3815	0.635552				O88935	Syn1	Synapsin-1	Syn1	18.6728	0.683777
O54879	Hmgb3	High mobility group protein B3	Hmgb3	20.8031	0.388612			#N/A	F2Z3U3	Raph1	Ras association (RalGDS/AF-6) and pleckstrin homology domains 1	Raph1	23.0275	0.778756			#N/A	A0A087WR45	Prob1	Proline-rich basic protein 1	Prob1	17.4405	1.24167				O88952	Lin7c	Protein lin-7 homolog C	Lin7c	21.8361	0.809524
O54916	Reps1	RalBP1-associated Eps domain-containing protein 1	Reps1	18.7284	0.169101			#N/A	F2Z472	Svs3a	Seminal vesicle secretory protein 3A	Svs3a	24.1152	0.983879			#N/A	A0A0A6YVW3;A0A0A6YXA5	Ighv1-15;Ighv1-23	Immunoglobulin heavy variable V1-23 (Fragment)	Ighv1-15	19.6594	0.345886				O88983	Stx8	Syntaxin-8	Stx8	19.4399	0.23457
O54931	Akap2	A-kinase anchor protein 2	Akap2	20.7028	0.193743			#N/A	F6ZDS4	Tpr	Nucleoprotein TPR	Tpr	20.9378	0.440333			#N/A	A0A0A6YXW6	Igha	Immunoglobulin heavy constant alpha (Fragment)	Igha	22.5688	0.646587				O88990	Actn3	Alpha-actinin-3	Actn3	20.7696	1.64231
O54941	Smarce1	SWI/SNF-related matrix-associated actin-dependent regulator of chromatin subfamily E member 1	Smarce1	20.2481	0.320388			#N/A	F7BJK1	Pcdh1	Protocadherin 1 (Fragment)	Pcdh1	18.1922	1.47783			#N/A	A0A0B4J1F9	Tchh	Trichohyalin	Tchh	19.9683	1.19117				O89016	Abcd4	ATP-binding cassette sub-family D member 4	Abcd4	18.693	0.445571
O54946	Dnajb6	DnaJ homolog subfamily B member 6	Dnajb6	19.5773	0.204776			#N/A	F7BWT7	Tspan15	Tetraspanin-15	Tspan15	18.1313	0.665803			#N/A	A0A0B4J1G0	Fcgr4	Low affinity immunoglobulin gamma Fc region receptor IV	Fcgr4	19.6865	0.737448				O89017	Lgmn	Legumain	Lgmn	18.2289	1.85267
O54950	Prkag1	5'-AMP-activated protein kinase subunit gamma-1	Prkag1	19.9055	0.607233			#N/A	F8VPN4	Agl	Amylo-1,6-glucosidase, 4-alpha-glucanotransferase	Agl	22.3629	0.720555			#N/A	A0A0B4J1H7	Igkv1-135	Immunoglobulin kappa variable 1-135 (Fragment)	Igkv1-135	17.5336	0.924719				O89023	Tpp1	Tripeptidyl-peptidase 1	Tpp1	19.1273	0.566153
O54962	Banf1	Barrier-to-autointegration factor	Banf1	22.3921	0.488774			#N/A	F8VPP8	Zc3h7b	Zinc finger CCCH type-containing 7B	Zc3h7b	17.5644	0.817455			#N/A	A0A0B4J1J6	Ighv10-1	Immunoglobulin heavy variable 10-1 (Fragment)	Ighv10-1	18.7709	0.302285				O89051	Itm2b	Integral membrane protein 2B	Itm2b	19.4636	0.522287
O54974	Lgals7	Galectin-7	Lgals7	24.4521	0.788473			#N/A	F8VPQ6	Alpi	Alkaline phosphatase	Alpi	16.7843	2.59759			#N/A	A0A0J9YUD5	Nup205	Nucleoporin 205	Nup205	19.5404	0.369069				O89053	Coro1a	Coronin-1A	Coro1a	23.9703	0.617131
O54984	Asna1	ATPase Asna1	Asna1	20.5924	0.45985			#N/A	F8VPU2	Farp1	FERM, ARHGEF and pleckstrin domain-containing protein 1	Farp1	19.5601	0.428363			#N/A	A0A0U1RNF2	Lcmt1	Leucine carboxyl methyltransferase 1	Lcmt1	19.0385	0.350988				O89079	Cope	Coatomer subunit epsilon	Cope	22.6204	0.817837
O54988	Slk	STE20-like serine/threonine-protein kinase	Slk	21.0847	0.264221			#N/A	F8VQ05	Fryl	FRY-like transcription coactivator	Fryl	18.2121	0.278474			#N/A	A0A140LIF8	Irgm2	Immunity-related GTPase family M member 2	Irgm2	18.8937	0.407897				O89086	Rbm3	RNA-binding protein 3	Rbm3	23.8822	1.58259
O54992	Mapkapk5	MAP kinase-activated protein kinase 5	Mapkapk5	20.1075	0.147478			#N/A	F8VQC1	Srp72	Signal recognition particle subunit SRP72	Srp72	19.8701	0.310002			#N/A	A0A140LIJ4	Dnah14	Dynein, axonemal, heavy chain 14	Dnah14	20.4732	0.330797				O89094	Casp14	Caspase-14	Casp14	20.7922	0.949823
O54998	Fkbp7	Peptidyl-prolyl cis-trans isomerase FKBP7	Fkbp7	15.7257	0.475029			#N/A	G3UW81	Cyp4f40	Cytochrome P450, family 4, subfamily f, polypeptide 40	Cyp4f40	18.2343	0.782769			#N/A	A0A140T8M2	Igkv12-44	Immunoglobulin kappa variable 12-44 (Fragment)	Igkv12-44	18.6126	0.702312				O89110	Casp8	Caspase-8	Casp8	19.54	0.621469
O55013	Trappc3	Trafficking protein particle complex subunit 3	Trappc3	21.5423	0.474575			#N/A	G3UW82	Myh2	MCG140437, isoform CRA_d	Myh2	23.599	0.557918			#N/A	A0A140T8N9	Igkv6-32	Immunoglobulin kappa variable 6-32 (Fragment)	Igkv6-32	17.7822	0.801941				O89112	Lancl1	LanC-like protein 1	Lancl1	18.4897	0.691401
O55022	Pgrmc1	Membrane-associated progesterone receptor component 1	Pgrmc1	22.6199	0.431197			#N/A	G3X8U3	2210016F16Rik	Queuosine salvage protein	2210016F16Rik	21.6069	0.439006			#N/A	A0A1L1SQU7	Fat1	FAT atypical cadherin 1	Fat1	17.4739	0.191459				O89114	Dnajb5	DnaJ homolog subfamily B member 5	Dnajb5	17.0693	1.29782
O55023	Impa1	Inositol monophosphatase 1	Impa1	21.8568	0.984562			#N/A	G3X939	Slc9a3	Sodium/hydrogen exchanger 3	Slc9a3	18.2124	0.345998			#N/A	A0A2I3BQG2	Crybg2	Crystallin beta-gamma domain-containing 2	Crybg2	16.5953	0.216285				P00158	Mt-Cyb	Cytochrome b	Mt-Cyb	18.1169	1.15621
O55026	Entpd2	Ectonucleoside triphosphate diphosphohydrolase 2	Entpd2	21.4824	0.637962			#N/A	G3X972	Sec24c	SEC24 related gene family, member C (S. cerevisiae), isoform CRA_a	Sec24c	20.7798	0.607983			#N/A	A0A2I3BR81	Nt5dc2	5'-nucleotidase domain-containing 2	Nt5dc2	17.8976	0.942097				P00329	Adh1	Alcohol dehydrogenase 1	Adh1	24.8628	1.32215
O55028	Bckdk	[3-methyl-2-oxobutanoate dehydrogenase [lipoamide]] kinase, mitochondrial	Bckdk	19.8177	0.600174			#N/A	G3X982	Aox3	Aldehyde oxidase 3	Aox3	19.4799	0.296124			#N/A	A0A2R8VHP3	Gm5478	Uncharacterized protein	Gm5478	23.8501	0.679805				P00375	Dhfr	Dihydrofolate reductase	Dhfr	20.2178	0.233073
O55029	Copb2	Coatomer subunit beta'	Copb2	23.3222	0.413232			#N/A	G3X9C2	Nccrp1	F-box only protein 50	Nccrp1	19.9011	0.721923			#N/A	A1L314	Mpeg1	Macrophage-expressed gene 1 protein	Mpeg1	17.7837	0.492075				P00405	Mtco2	Cytochrome c oxidase subunit 2	Mtco2	25.5021	0.768869
O55033	Nck2	Cytoplasmic protein NCK2	Nck2	19.1484	0.137221			#N/A	G3X9J0	Sipa1l3	Signal-induced proliferation-associated 1-like protein 3	Sipa1l3	17.9534	0.217331			#N/A	A2A432	Cul4b	Cullin-4B	Cul4b	18.3883	0.253142				P00416	mt-Co3	Cytochrome c oxidase subunit 3	mt-Co3	18.122	0.940586
O55060	Tpmt	Thiopurine S-methyltransferase	Tpmt	18.3203	0.295638			#N/A	G3X9V8	Serpinb3a	MCG129038	Serpinb3a	19.6214	1.12874			#N/A	A2A484	Zmynd8	Zinc finger, MYND-type-containing 8	Zmynd8	17.5165	0.298151				P00493	Hprt1	Hypoxanthine-guanine phosphoribosyltransferase	Hprt1	21.2947	0.511963
O55091	Impact	Protein IMPACT	Impact	17.4869	0.622978			#N/A	G3X9Y6	Akr1c19	Aldo-keto reductase family 1, member C19	Akr1c19	22.96	0.264272			#N/A	A2A4P0	Dhx8	ATP-dependent RNA helicase DHX8	Dhx8	18.6617	0.766673				P00688	Amy2	Pancreatic alpha-amylase	Amy2	18.693	1.23466
O55100	Syngr1	Synaptogyrin-1	Syngr1	17.5568	0.499327			#N/A	G3X9Z4	Pcf11	Cleavage and polyadenylation factor subunit homolog (S. cerevisiae)	Pcf11	18.14	0.151562			#N/A	A2A5R2	Arfgef2	Brefeldin A-inhibited guanine nucleotide-exchange protein 2	Arfgef2	19.6044	0.650387				P00920	Ca2	Carbonic anhydrase 2	Ca2	24.0711	0.931675
O55101	Syngr2	Synaptogyrin-2	Syngr2	20.8218	0.323725			#N/A	G5E829	Atp2b1	Plasma membrane calcium-transporting ATPase 1	Atp2b1	21.3745	0.143799			#N/A	A2A6A1	Gpatch8	G patch domain-containing protein 8	Gpatch8	17.5141	0.698787				P01027	C3	Complement C3	C3	22.2559	1.04407
O55106	Strn	Striatin	Strn	20.5702	0.12358			#N/A	G5E870	Trip12	E3 ubiquitin-protein ligase TRIP12	Trip12	19.4009	0.758056			#N/A	A2A6T1	Cdr2l	Cerebellar degeneration-related protein 2-like	Cdr2l	17.2843	0.9103				P01029	C4b	Complement C4-B	C4b	20.3816	1.06302
O55111	Dsg2	Desmoglein-2	Dsg2	22.2285	0.150447			#N/A	G5E895	Akr1b10	Aldo-keto reductase family 1, member B10 (aldose reductase)	Akr1b10	20.6716	0.814422			#N/A	A2A716	Osbpl7	Oxysterol-binding protein	Osbpl7	17.3061	2.0234				P01592	Jchain	Immunoglobulin J chain	Jchain	19.4366	0.384864
O55125	Nipsnap1	Protein NipSnap homolog 1	Nipsnap1	22.5984	0.352016			#N/A	G5E897	Kdelc2	KDEL (Lys-Asp-Glu-Leu) containing 2, isoform CRA_b	Kdelc2	18.5398	0.975269			#N/A	A2A7S8	Kiaa1522	Uncharacterized protein KIAA1522	Kiaa1522	19.3363	0.372135				P01631	-	Ig kappa chain V-II region 26-10	-	21.3228	0.841107
O55126	Nipsnap2	Protein NipSnap homolog 2	Nipsnap2	22.0798	0.471494			#N/A	G5E8J6	Hrc	Histidine rich calcium binding protein, isoform CRA_a	Hrc	18.0191	0.40206			#N/A	A2A863	Itgb4	Integrin beta-4	Itgb4	21.9502	0.283982				P01633	Igk-V19-17	Ig kappa chain V19-17	Igk-V19-17	19.1091	0.739692
O55128	Sap18	Histone deacetylase complex subunit SAP18	Sap18	21.0824	0.663701			#N/A	G5E8K5	Ank3	Ankyrin-3	Ank3	20.1988	0.590658			#N/A	A2A8L5	Ptprf	Receptor-type tyrosine-protein phosphatase F	Ptprf	19.1373	0.331173				P01723;P01727	-	Ig lambda-1 chain V region		20.5585	0.897456
O55131	2007-09-01	Septin-7	2007-09-01	23.0595	0.373124			#N/A	G5E8L3	Nat8f4	MCG128680, isoform CRA_a	Nat8f4	17.6213	0.376404			#N/A	A2A8U2	Tmem201	Transmembrane protein 201	Tmem201	17.9569	0.548882				P01751;P01753;P01754	Ighv1-62-3;Ighv1-72	Ig heavy chain V region B1-8/186-2	Ighv1-62-3	19.9791	1.33624
O55142	Rpl35a	60S ribosomal protein L35a	Rpl35a	22.0903	0.752076			#N/A	G5E8V9	Arfip1	ADP-ribosylation factor-interacting protein 1	Arfip1	20.8771	0.491988			#N/A	A2A9K7	Cnksr1	Connector enhancer of kinase suppressor of Ras 1	Cnksr1	17.775	0.272175				P01831	Thy1	Thy-1 membrane glycoprotein	Thy1	20.0511	1.37579
O55143	Atp2a2	Sarcoplasmic/endoplasmic reticulum calcium ATPase 2	Atp2a2	24.7163	0.426989			#N/A	H3BKP8	9930021J03Rik	RIKEN cDNA 9930021J03 gene	9930021J03Rik	20.5078	0.545516			#N/A	A2AAE1	Kiaa1109	Transmembrane protein KIAA1109	Kiaa1109	16.2921	1.69777				P01837	Igkc	Immunoglobulin kappa constant	Igkc	20.9084	1.28899
O55201	Supt5h	Transcription elongation factor SPT5	Supt5h	19.8006	0.36292			#N/A	I7HPW8	Myo15b	Myosin XVB	Myo15b	20.9286	0.231585			#N/A	A2AAJ9	Obscn	Obscurin	Obscn	20.5792	1.09943				P01867	Igh-3	Ig gamma-2B chain C region	Igh-3	19.7617	1.2865
O55222	Ilk	Integrin-linked protein kinase	Ilk	22.2994	0.430307			#N/A	J3QN89	Aamp	Angio-associated migratory protein	Aamp	18.8722	0.605971			#N/A	A2AAY5	Sh3pxd2b	SH3 and PX domain-containing protein 2B	Sh3pxd2b	19.7861	0.742458				P01869	Ighg1	Ig gamma-1 chain C region, membrane-bound form	Ighg1	20.342	0.969327
O55229	Chkb	Choline/ethanolamine kinase	Chkb	18.566	0.862062			#N/A	O08529	Capn2	Calpain-2 catalytic subunit	Capn2	22.4858	0.332287			#N/A	A2AB59	Arhgap27	Rho GTPase-activating protein 27	Arhgap27	18.3264	0.793111				P01872	Ighm	Immunoglobulin heavy constant mu	Ighm	20.5886	1.86796
O55234	Psmb5	Proteasome subunit beta type-5	Psmb5	22.4183	0.458848			#N/A	O08532	Cacna2d1	Voltage-dependent calcium channel subunit alpha-2/delta-1	Cacna2d1	21.9059	0.457632			#N/A	A2ABU4	Myom3	Myomesin-3	Myom3	20.6927	0.743077				P01887	B2m	Beta-2-microglobulin	B2m	24.0939	0.702177
O55242	Sigmar1	Sigma non-opioid intracellular receptor 1	Sigmar1	19.6348	0.882971			#N/A	O08539	Bin1	Myc box-dependent-interacting protein 1	Bin1	22.13	1.05122			#N/A	A2ABV5	Med14	Mediator of RNA polymerase II transcription subunit 14	Med14	15.7995	0.485265				P01897	H2-L	H-2 class I histocompatibility antigen, L-D alpha chain	H2-L	22.3447	1.09097
O70133	Dhx9	ATP-dependent RNA helicase A	Dhx9	22.2919	0.165347			#N/A	O08547	Sec22b	Vesicle-trafficking protein SEC22b	Sec22b	20.0876	0.612683			#N/A	A2ACP1	Ttc39a	Tetratricopeptide repeat protein 39A	Ttc39a	20.4987	0.64712				P01921	H2-Ab1	H-2 class II histocompatibility antigen, A-D beta chain	H2-Ab1	20.6778	1.23062
O70152	Dpm1	Dolichol-phosphate mannosyltransferase subunit 1	Dpm1	20.625	0.521361			#N/A	O08553	Dpysl2	Dihydropyrimidinase-related protein 2	Dpysl2	24.4025	0.395486			#N/A	A2ADY9	Ddi2	Protein DDI1 homolog 2	Ddi2	21.345	0.291991				P01942	Hba	Hemoglobin subunit alpha	Hba	24.5011	0.768619
O70172	Pip4k2a	Phosphatidylinositol 5-phosphate 4-kinase type-2 alpha	Pip4k2a	20.8136	0.443039			#N/A	O08573	Lgals9	Galectin-9	Lgals9	20.9963	0.485233			#N/A	A2AF47	Dock11	Dedicator of cytokinesis protein 11	Dock11	18.5676	0.848121				P02463	Col4a1	Collagen alpha-1(IV) chain	Col4a1	23.1181	0.525194
O70194	Eif3d	Eukaryotic translation initiation factor 3 subunit D	Eif3d	20.923	0.325382			#N/A	O08579	Emd	Emerin	Emd	20.1472	0.191052			#N/A	A2AFS3	Kiaa1324	UPF0577 protein KIAA1324	Kiaa1324	16.6562	0.9735				P02468	Lamc1	Laminin subunit gamma-1	Lamc1	23.5754	0.733169
O70200	Aif1	Allograft inflammatory factor 1	Aif1	18.9394	0.312732			#N/A	O08582	Gtpbp1	GTP-binding protein 1	Gtpbp1	19.2633	0.94015			#N/A	A2AGH6	Med12	Mediator of RNA polymerase II transcription subunit 12	Med12	14.9944	0.714339				P02469	Lamb1	Laminin subunit beta-1	Lamb1	21.9827	0.504627
O70209	Pdlim3	PDZ and LIM domain protein 3	Pdlim3	24.6976	0.440549			#N/A	O08585	Clta	Clathrin light chain A	Clta	22.7616	0.562301			#N/A	A2AGT5	Ckap5	Cytoskeleton-associated protein 5	Ckap5	19.6284	0.146351				P02535	Krt10	Keratin, type I cytoskeletal 10	Krt10	26.0493	0.981561
O70228	Atp9a	Probable phospholipid-transporting ATPase IIA	Atp9a	19.7028	0.214419			#N/A	O08586	Pten	Phosphatidylinositol 3,4,5-trisphosphate 3-phosphatase and dual-specificity protein phosphatase PTEN	Pten	19.0751	0.322348			#N/A	A2AI08	Tprn	Taperin	Tprn	18.9484	0.692206				P03958	Ada	Adenosine deaminase	Ada	20.634	0.349516
O70250	Pgam2	Phosphoglycerate mutase 2	Pgam2	23.419	1.05565			#N/A	O08599	Stxbp1	Syntaxin-binding protein 1	Stxbp1	19.9169	0.393985			#N/A	A2AIV2	Virma	Protein virilizer homolog	Virma	17.8699	0.367824				P03975	Iap	IgE-binding protein	Iap	19.3348	0.686709
O70251	Eef1b	Elongation factor 1-beta	Eef1b	22.4568	1.0915			#N/A	O08600	Endog	Endonuclease G, mitochondrial	Endog	21.0189	0.427555			#N/A	A2AJ15	Man1b1	Endoplasmic reticulum mannosyl-oligosaccharide 1,2-alpha-mannosidase	Man1b1	17.268	0.620418				P03995	Gfap	Glial fibrillary acidic protein	Gfap	21.1715	0.779752
O70252	Hmox2	Heme oxygenase 2	Hmox2	19.6434	0.530293			#N/A	O08638	Myh11	Myosin-11	Myh11	27.948	0.284869			#N/A	A2AJ76	Hmcn2	Hemicentin-2	Hmcn2	19.7295	0.599125				P04104	Krt1	Keratin, type II cytoskeletal 1	Krt1	26.4489	1.77482
O70258	Sgce	Epsilon-sarcoglycan	Sgce	20.3772	0.465236			#N/A	O08663	Metap2	Methionine aminopeptidase 2	Metap2	20.9444	0.643835			#N/A	A2AJI0	Map7d1	MAP7 domain-containing protein 1	Map7d1	18.985	0.44726				P04117	Fabp4	Fatty acid-binding protein, adipocyte	Fabp4	25.782	1.11705
O70274	Ptp4a2	Protein tyrosine phosphatase type IVA 2	Ptp4a2	20.8803	0.723679			#N/A	O08664	Bcl7c	B-cell CLL/lymphoma 7 protein family member C	Bcl7c	19.0393	0.39827			#N/A	A2AKG8	Focad	Focadhesin	Focad	16.8578	0.576766				P04247	Mb	Myoglobin	Mb	19.8326	0.454129
O70305	Atxn2	Ataxin-2	Atxn2	18.8329	0.360013			#N/A	O08677	Kng1	Kininogen-1	Kng1	20.1639	0.91642			#N/A	A2ALK8	Ptpn3	Tyrosine-protein phosphatase non-receptor type 3	Ptpn3	16.8748	0.920703				P04342;P04345;Q03740;Q9CXV3	Cryga;Crygd;Cryge;Crygf	Gamma-crystallin D	Cryga	23.0258	0.395077
O70310	Nmt1	Glycylpeptide N-tetradecanoyltransferase 1	Nmt1	21.2347	0.430267			#N/A	O08688	Capn5	Calpain-5	Capn5	19.2692	0.821171			#N/A	A2ALU4	Shroom2	Protein Shroom2	Shroom2	17.177	0.86601				P04627	Araf	Serine/threonine-protein kinase A-Raf	Araf	18.8275	0.474944
O70311	Nmt2	Glycylpeptide N-tetradecanoyltransferase 2	Nmt2	17.1262	0.904908			#N/A	O08692	Ngp	Neutrophilic granule protein	Ngp	17.8788	1.01859			#N/A	A2AMM0	Cavin4	Caveolae-associated protein 4	Cavin4	17.6413	0.709414				P04925	Prnp	Major prion protein	Prnp	18.6835	1.00214
O70318	Epb41l2	Band 4.1-like protein 2	Epb41l2	22.521	0.583717			#N/A	O08709	Prdx6	Peroxiredoxin-6	Prdx6	25.4359	0.710942			#N/A	A2AN08	Ubr4	E3 ubiquitin-protein ligase UBR4	Ubr4	20.4893	0.293157				P05063	Aldoc	Fructose-bisphosphate aldolase C	Aldoc	19.9398	0.293949
O70325	Gpx4	Phospholipid hydroperoxide glutathione peroxidase	Gpx4	20.544	0.195004			#N/A	O08715	Akap1	A-kinase anchor protein 1, mitochondrial	Akap1	18.3287	0.868312			#N/A	A2ANX3	Atp8b4	Phospholipid-transporting ATPase	Atp8b4	20.153	0.986944				P05064	Aldoa	Fructose-bisphosphate aldolase A	Aldoa	25.6447	0.432739
O70370	Ctss	Cathepsin S	Ctss	21.2761	0.594665			#N/A	O08739	Ampd3	AMP deaminase 3	Ampd3	20.51	0.388057			#N/A	A2ANY6	Mdn1	Midasin	Mdn1	17.7638	0.0996681				P05132	Prkaca	cAMP-dependent protein kinase catalytic subunit alpha	Prkaca	17.3132	1.34414
O70378	Emc8	ER membrane protein complex subunit 8	Emc8	21.1685	0.280448			#N/A	O08746	Matn2	Matrilin-2	Matn2	18.9218	0.605959			#N/A	A2APY7	Ndufaf5	Arginine-hydroxylase NDUFAF5, mitochondrial	Ndufaf5	17.233	0.579286				P05201	Got1	Aspartate aminotransferase, cytoplasmic	Got1	22.8826	0.375719
O70400	Pdlim1	PDZ and LIM domain protein 1	Pdlim1	24.0273	0.286151			#N/A	O08749	Dld	Dihydrolipoyl dehydrogenase, mitochondrial	Dld	23.9771	0.472087			#N/A	A2AQ19	Rtf1	RNA polymerase-associated protein RTF1 homolog	Rtf1	17.8851	0.446881				P05202	Got2	Aspartate aminotransferase, mitochondrial	Got2	23.5975	0.435166
O70404	Vamp8	Vesicle-associated membrane protein 8	Vamp8	20.0026	0.275277			#N/A	O08756	Hsd17b10	3-hydroxyacyl-CoA dehydrogenase type-2	Hsd17b10	22.1821	0.992578			#N/A	A2AQ25	Skt	Sickle tail protein	Skt	19.813	0.325718				P05366	Saa1	Serum amyloid A-1 protein	Saa1	21.6626	1.10684
O70423	Aoc3	Membrane primary amine oxidase	Aoc3	24.3366	0.236791			#N/A	O08759	Ube3a	Ubiquitin-protein ligase E3A	Ube3a	20.0839	0.539042			#N/A	A2AQ99	Duox2	Dual oxidase 2	Duox2	19.8947	0.403092				P05555	Itgam	Integrin alpha-M	Itgam	19.5671	1.20236
O70433	Fhl2	Four and a half LIM domains protein 2	Fhl2	19.6848	0.555177			#N/A	O08788	Dctn1	Dynactin subunit 1	Dctn1	20.5644	0.269194			#N/A	A2AR02	Ppig	Peptidyl-prolyl cis-trans isomerase G	Ppig	19.2635	0.525822				P05784	Krt18	Keratin, type I cytoskeletal 18	Krt18	25.1904	0.875532
O70435	Psma3	Proteasome subunit alpha type-3	Psma3	22.6869	0.365528			#N/A	O08795	Prkcsh	Glucosidase 2 subunit beta	Prkcsh	22.6268	0.520305			#N/A	A2ARI4	Lgr4	Leucine-rich repeat-containing G-protein coupled receptor 4	Lgr4	17.9051	0.457545				P05977	Myl1	Myosin light chain 1/3, skeletal muscle isoform	Myl1	23.2677	1.387
O70439	Stx7	Syntaxin-7	Stx7	19.729	0.618604			#N/A	O08796	Eef2k	Eukaryotic elongation factor 2 kinase	Eef2k	20.0757	0.262167			#N/A	A2ASS6	Ttn	Titin	Ttn	23.3158	1.01385				P06151	Ldha	L-lactate dehydrogenase A chain	Ldha	26.4649	0.586116
O70456	Sfn	14-3-3 protein sigma	Sfn	22.6809	0.515343			#N/A	O08807	Prdx4	Peroxiredoxin-4	Prdx4	24.124	0.302058			#N/A	A2AT37	Upf2	UPF2 regulator of nonsense transcripts homolog (Yeast)	Upf2	17.9458	0.763823				P06344	-	H-2 class II histocompatibility antigen, A-U beta chain	-	20.668	0.776361
O70475	Ugdh	UDP-glucose 6-dehydrogenase	Ugdh	23.7478	0.546655			#N/A	O08808	Diaph1	Protein diaphanous homolog 1	Diaph1	20.3373	0.314327			#N/A	A2AUA2;Q7TQZ3	Olfr1251;Olfr1253	Olfactory receptor	Olfr1251	17.8422	1.03787				P06537	Nr3c1	Glucocorticoid receptor	Nr3c1	18.2244	1.10916
O70481	Ubr1	E3 ubiquitin-protein ligase UBR1	Ubr1	18.1485	0.191998			#N/A	O08810	Eftud2	116 kDa U5 small nuclear ribonucleoprotein component	Eftud2	20.5945	0.612224			#N/A	A2AUC9	Klhl41	Kelch-like protein 41	Klhl41	20.6481	1.07987				P06728	Apoa4	Apolipoprotein A-IV	Apoa4	20.8025	1.43911
O70492	Snx3	Sorting nexin-3	Snx3	21.0478	0.335434			#N/A	O08832	Galnt4	Polypeptide N-acetylgalactosaminyltransferase 4	Galnt4	20.122	1.08563			#N/A	A2AVA0	Svep1	Sushi, von Willebrand factor type A, EGF and pentraxin domain-containing protein 1	Svep1	17.6748	0.463018				P06745	Gpi	Glucose-6-phosphate isomerase	Gpi	23.9593	0.274211
O70493	Snx12	Sorting nexin-12	Snx12	21.5725	0.264553			#N/A	O08912	Galnt1	Polypeptide N-acetylgalactosaminyltransferase 1	Galnt1	19.6386	0.757603			#N/A	A2AWA9	Rabgap1	Rab GTPase-activating protein 1	Rabgap1	18.7369	0.227917				P06800	Ptprc	Receptor-type tyrosine-protein phosphatase C	Ptprc	21.4174	1.13122
O70503	Hsd17b12	Very-long-chain 3-oxoacyl-CoA reductase	Hsd17b12	20.7409	0.32643			#N/A	O08914	Faah	Fatty-acid amide hydrolase 1	Faah	16.5291	1.57943			#N/A	A2AWP8	Arhgef10l	Rho guanine nucleotide exchange factor 10-like protein	Arhgef10l	18.7677	0.431058				P06837	Gap43	Neuromodulin	Gap43	19.1037	0.585287
O70548	Tcap	Telethonin	Tcap	19.8431	0.410643			#N/A	O08915	Aip	AH receptor-interacting protein	Aip	18.9652	0.395827			#N/A	A2AX52	Col6a4	Collagen alpha-4(VI) chain	Col6a4	19.9864	0.384466				P06909	Cfh	Complement factor H	Cfh	21.1363	1.45507
O70551	Srpk1	SRSF protein kinase 1	Srpk1	19.5596	0.536377			#N/A	O08917	Flot1	Flotillin-1	Flot1	19.8912	0.506636			#N/A	A2BDX3	Mocs3	Adenylyltransferase and sulfurtransferase MOCS3	Mocs3	17.5774	0.618137				P07091	S100a4	Protein S100-A4	S100a4	22.6402	1.14597
O70566	Diaph2	Protein diaphanous homolog 2	Diaph2	18.2552	0.250379			#N/A	O08992	Sdcbp	Syntenin-1	Sdcbp	16.1765	0.917291			#N/A	A2BE28	Las1l	Ribosomal biogenesis protein LAS1L	Las1l	17.672	1.10176				P07146	Prss2	Anionic trypsin-2	Prss2	19.8204	0.790422
O70570	Pigr	Polymeric immunoglobulin receptor	Pigr	21.9674	0.31578			#N/A	O08997	Atox1	Copper transport protein ATOX1	Atox1	21.6376	0.997061			#N/A	A2BH40	Arid1a	AT-rich interactive domain-containing protein 1A	Arid1a	18.5715	0.283397				P07214	Sparc	SPARC	Sparc	19.9898	1.21592
O70572	Smpd2	Sphingomyelin phosphodiesterase 2	Smpd2	20.4957	0.384892			#N/A	O09012	Pex5	Peroxisomal targeting signal 1 receptor	Pex5	18.2872	0.923338			#N/A	A2RSY1	Kansl3	KAT8 regulatory NSL complex subunit 3	Kansl3	16.7203	0.274604				P07309	Ttr	Transthyretin	Ttr	21.7019	0.575218
O70583	Mid1	E3 ubiquitin-protein ligase Midline-1	Mid1	17.1911	0.249282			#N/A	O09044	Snap23	Synaptosomal-associated protein 23	Snap23	21.1977	0.352455			#N/A	A2RT67	Dennd3	DENN domain-containing protein 3	Dennd3	16.9986	0.119945				P07310	Ckm	Creatine kinase M-type	Ckm	24.4906	1.16939
O70589	Cask	Peripheral plasma membrane protein CASK	Cask	19.7705	0.147314			#N/A	O09061	Psmb1	Proteasome subunit beta type-1	Psmb1	23.2342	0.633507			#N/A	A3KFX0	Nt5c1a	Cytosolic 5'-nucleotidase 1A	Nt5c1a	17.89	0.225921				P07356	Anxa2	Annexin A2	Anxa2	25.5727	0.304492
O70591	Pfdn2	Prefoldin subunit 2	Pfdn2	21.0886	0.217818			#N/A	O09106	Hdac1	Histone deacetylase 1	Hdac1	19.42	0.378751			#N/A	A3KGB4	Tbc1d8b	TBC1 domain family member 8B	Tbc1d8b	18.4085	0.473731				P07607	Tyms	Thymidylate synthase	Tyms	19.0779	0.722153
O70628	Pde9a	High affinity cGMP-specific 3',5'-cyclic phosphodiesterase 9A	Pde9a	15.0282	1.48185			#N/A	O09110	Map2k3	Dual specificity mitogen-activated protein kinase kinase 3	Map2k3	20.1894	1.07402			#N/A	A3KGF9	Ccdc9b	Coiled-coil domain-containing protein 9B	Ccdc9b	18.0496	0.368916				P07724	Alb	Serum albumin	Alb	25.0195	0.876671
O88207	Col5a1	Collagen alpha-1(V) chain	Col5a1	23.1441	0.541527			#N/A	O09111	Ndufb11	NADH dehydrogenase [ubiquinone] 1 beta subcomplex subunit 11, mitochondrial	Ndufb11	21.0349	1.28304			#N/A	A3KGS3	Ralgapa2	Ral GTPase-activating protein subunit alpha-2	Ralgapa2	17.3984	0.543229				P07742	Rrm1	Ribonucleoside-diphosphate reductase large subunit	Rrm1	18.8808	0.694819
O88271	Cfdp1	Craniofacial development protein 1	Cfdp1	19.3951	0.576297			#N/A	O09117	Sypl1	Synaptophysin-like protein 1	Sypl1	19.9056	0.383201			#N/A	A3KMP2	Ttc38	Tetratricopeptide repeat protein 38	Ttc38	20.4509	0.48403				P07744	Krt4	Keratin, type II cytoskeletal 4	Krt4	22.5005	0.883431
O88286	Wiz	Protein Wiz	Wiz	18.0486	0.75776			#N/A	O09131	Gsto1	Glutathione S-transferase omega-1	Gsto1	23.9384	0.384981			#N/A	A6H584	Col6a5	Collagen alpha-5(VI) chain	Col6a5	19.3899	0.619222				P07901	Hsp90aa1	Heat shock protein HSP 90-alpha	Hsp90aa1	23.8233	0.268814
O88291	Znf326	DBIRD complex subunit ZNF326	Znf326	18.7934	0.31242			#N/A	O09159	Man2b1	Lysosomal alpha-mannosidase	Man2b1	19.6204	0.558684			#N/A	A6H5Y3	Mtr	Methionine synthase	Mtr	17.807	0.433893				P08030	Aprt	Adenine phosphoribosyltransferase	Aprt	21.8407	0.717626
O88307	Sorl1	Sortilin-related receptor	Sorl1	19.4013	0.68376			#N/A	O09161	Casq2	Calsequestrin-2	Casq2	20.0629	0.644547			#N/A	A6H5Z3	Exoc6b	Exocyst complex component 6B	Exoc6b	17.6224	0.540295				P08071	Ltf	Lactotransferrin	Ltf	21.7971	1.11932
O88312	Agr2	Anterior gradient protein 2 homolog	Agr2	26.0687	0.502798			#N/A	O09164	Sod3	Extracellular superoxide dismutase [Cu-Zn]	Sod3	18.6474	0.757807			#N/A	A6H611	Mipep	Mitochondrial intermediate peptidase	Mipep	17.7878	0.428991				P08074	Cbr2	Carbonyl reductase [NADPH] 2	Cbr2	21.7903	0.666351
O88322	Nid2	Nidogen-2	Nid2	21.5076	0.326852			#N/A	O09165	Casq1	Calsequestrin-1	Casq1	20.5246	1.32159			#N/A	A6H6A9	Rabgap1l	Rab GTPase-activating protein 1-like	Rabgap1l	18.9554	0.649678				P08101	Fcgr2	Low affinity immunoglobulin gamma Fc region receptor II	Fcgr2	19.691	1.18222
O88325	Naglu	Alpha-N-acetylglucosaminidase	Naglu	19.3518	0.673049			#N/A	O09172	Gclm	Glutamate--cysteine ligase regulatory subunit	Gclm	20.6251	0.744198			#N/A	A6H6E2	Mmrn2	Multimerin-2	Mmrn2	17.7757	0.236237				P08113	Hsp90b1	Endoplasmin	Hsp90b1	24.626	0.421148
O88327	Ctnnal1	Alpha-catulin	Ctnnal1	19.3838	0.705477			#N/A	O09174	Amacr	Alpha-methylacyl-CoA racemase	Amacr	18.955	0.623839			#N/A	A6X919	Dpy19l1	Probable C-mannosyltransferase DPY19L1	Dpy19l1	18.0813	0.362446				P08121	Col3a1	Collagen alpha-1(III) chain	Col3a1	24.5178	0.706365
O88329	Myo1a	Unconventional myosin-Ia	Myo1a	22.7073	0.413046			#N/A	O35071	Kif1c	Kinesin-like protein KIF1C	Kif1c	19.3284	0.419586			#N/A	A6X935	Itih4	Inter alpha-trypsin inhibitor, heavy chain 4	Itih4	20.9502	0.814363				P08226	Apoe	Apolipoprotein E	Apoe	21.0052	0.6018
O88342	Wdr1	WD repeat-containing protein 1	Wdr1	24.291	0.205809			#N/A	O35074	Ptgis	Prostacyclin synthase	Ptgis	21.1096	0.248874			#N/A	A6ZI47	Aldoart2	Fructose-bisphosphate aldolase	Aldoart2	20.2202	0.803235				P08228	Sod1	Superoxide dismutase [Cu-Zn]	Sod1	22.7579	1.04916
O88343	Slc4a4	Electrogenic sodium bicarbonate cotransporter 1	Slc4a4	19.974	0.235228			#N/A	O35075	Dscr3	Down syndrome critical region protein 3 homolog	Dscr3	19.4429	0.875422			#N/A	A8C756	Thada	Thyroid adenoma-associated protein homolog	Thada	16.6901	0.91174				P08249	Mdh2	Malate dehydrogenase, mitochondrial	Mdh2	25.0917	0.985901
O88351	Ikbkb	Inhibitor of nuclear factor kappa-B kinase subunit beta	Ikbkb	19.749	0.241683			#N/A	O35083	Agpat1	1-acyl-sn-glycerol-3-phosphate acyltransferase alpha	Agpat1	19.1497	0.587878			#N/A	A8DUK4	Hbb-bs	Beta-globin	Hbb-bs	25.1883	0.476593				P08551	Nefl	Neurofilament light polypeptide	Nefl	19.6725	0.576193
O88384	Vti1b	Vesicle transport through interaction with t-SNAREs homolog 1B	Vti1b	20.251	0.412513			#N/A	O35114	Scarb2	Lysosome membrane protein 2	Scarb2	19.8689	0.979505			#N/A	A9JSM3	Tmem238	Transmembrane protein 238	Tmem238	18.286	0.525182				P08553	Nefm	Neurofilament medium polypeptide	Nefm	19.1395	0.666095
O88441	Mtx2	Metaxin-2	Mtx2	19.4922	0.349238			#N/A	O35129	Phb2	Prohibitin-2	Phb2	23.0142	0.420209			#N/A	B1AQ75	Krt36	Keratin, type I cuticular Ha6	Krt36	17.9466	1.21659				P08556	Nras	GTPase NRas	Nras	17.6125	0.238413
O88447	Klc1	Kinesin light chain 1	Klc1	19.9968	1.04902			#N/A	O35136	Ncam2	Neural cell adhesion molecule 2	Ncam2	19.2643	1.56958			#N/A	B1AR17	Chd3	Chromodomain helicase DNA-binding protein 3	Chd3	17.6262	0.466739				P08607	C4bpa	C4b-binding protein	C4bpa	17.8202	1.94404
O88448	Klc2	Kinesin light chain 2	Klc2	19.9088	0.49543			#N/A	O35143	ATP5IF1	ATPase inhibitor, mitochondrial	ATP5IF1	21.5501	2.16171			#N/A	B1AR69	Myh13	Myosin, heavy polypeptide 13, skeletal muscle	Myh13	19.5102	1.34642				P08730	Krt13	Keratin, type I cytoskeletal 13	Krt13	24.1185	2.65099
O88451	Rdh7	Retinol dehydrogenase 7	Rdh7	19.4823	0.446489			#N/A	O35206	Col15a1	Collagen alpha-1(XV) chain	Col15a1	21.564	0.292895			#N/A	B1ARD6	Slfn9	Schlafen family member 9	Slfn9	16.8773	0.653391				P08752	Gnai2	Guanine nucleotide-binding protein G(i) subunit alpha-2	Gnai2	20.4655	1.63701
O88456	Capns1	Calpain small subunit 1	Capns1	21.3945	0.460538			#N/A	O35215	Ddt	D-dopachrome decarboxylase	Ddt	22.4587	0.348444			#N/A	B1ART2	Vps13d	Vacuolar protein sorting 13D	Vps13d	18.506	0.27187				P08775	Polr2a	DNA-directed RNA polymerase II subunit RPB1	Polr2a	19.6361	0.615381
O88487	Dync1i2	Cytoplasmic dynein 1 intermediate chain 2	Dync1i2	22.8568	0.432321			#N/A	O35218	Cpsf2	Cleavage and polyadenylation specificity factor subunit 2	Cpsf2	18.3325	0.621729			#N/A	B1AUN2	Eif2b3	Eukaryotic translation initiation factor 2B, subunit 3	Eif2b3	19.6601	0.239627				P09036	Spink1	Serine protease inhibitor Kazal-type 1	Spink1	22.3414	1.32763
O88492	Plin4	Perilipin-4	Plin4	21.3238	0.35682			#N/A	O35226	Psmd4	26S proteasome non-ATPase regulatory subunit 4	Psmd4	20.8109	0.341223			#N/A	B1AUY3	Arhgap4	Rho GTPase-activating protein 4	Arhgap4	18.1291	0.735798				P09055	Itgb1	Integrin beta-1	Itgb1	22.9191	0.287561
O88512	Ap1g2	AP-1 complex subunit gamma-like 2	Ap1g2	20.4858	0.640234			#N/A	O35239	Ptpn9	Tyrosine-protein phosphatase non-receptor type 9	Ptpn9	17.5291	0.567059			#N/A	B1AVH7	Tbc1d2	TBC1 domain family member 2A	Tbc1d2	18.9676	0.315974				P09103	P4hb	Protein disulfide-isomerase	P4hb	24.5989	0.133349
O88520	Shoc2	Leucine-rich repeat protein SHOC-2	Shoc2	18.6163	0.131291			#N/A	O35250	Exoc7	Exocyst complex component 7	Exoc7	18.4655	0.788588			#N/A	B1AVK5	Col4a6	Collagen, type IV, alpha 6	Col4a6	17.5391	0.55				P09405	Ncl	Nucleolin	Ncl	24.4472	0.355847
O88531	Ppt1	Palmitoyl-protein thioesterase 1	Ppt1	18.9223	0.920201			#N/A	O35286	Dhx15	Pre-mRNA-splicing factor ATP-dependent RNA helicase DHX15	Dhx15	20.768	0.387716			#N/A	B1AXH1	Nhsl2	NHS-like protein 2	Nhsl2	17.5714	0.395239				P09411	Pgk1	Phosphoglycerate kinase 1	Pgk1	24.3448	0.466983
O88532	Zfr	Zinc finger RNA-binding protein	Zfr	18.7938	0.153816			#N/A	O35295	Purb	Transcriptional activator protein Pur-beta	Purb	21.7346	0.730244			#N/A	B1AY13	Usp24	Ubiquitin carboxyl-terminal hydrolase 24	Usp24	18.2281	0.800996				P09470	Ace	Angiotensin-converting enzyme	Ace	19.1965	0.851099
O88533	Ddc	Aromatic-L-amino-acid decarboxylase	Ddc	20.0741	0.700253			#N/A	O35345	Kpna6	Importin subunit alpha-7	Kpna6	19.0349	0.62375			#N/A	B1AYL1	Scn7a	Sodium channel protein	Scn7a	20.0494	0.762886				P09528	Fth1	Ferritin heavy chain	Fth1	21.1801	0.927252
O88543	Cops3	COP9 signalosome complex subunit 3	Cops3	21.3386	0.446298			#N/A	O35350	Capn1	Calpain-1 catalytic subunit	Capn1	21.7253	0.272003			#N/A	B1AZA5	Tmem245	Transmembrane protein 245	Tmem245	19.4604	0.299331				P09541	Myl4	Myosin light chain 4	Myl4	17.9306	1.74667
O88544	Cops4	COP9 signalosome complex subunit 4	Cops4	21.3886	0.169602			#N/A	O35379	Abcc1	Multidrug resistance-associated protein 1	Abcc1	19.1461	0.341812			#N/A	B1AZI6	Thoc2	THO complex subunit 2	Thoc2	18.419	0.729275				P09542	Myl3	Myosin light chain 3	Myl3	23.7313	1.56784
O88545	Cops6	COP9 signalosome complex subunit 6	Cops6	20.3779	0.974157			#N/A	O35381	Anp32a	Acidic leucine-rich nuclear phosphoprotein 32 family member A	Anp32a	23.5964	0.243871			#N/A	B2RQG2	Phf3	PHD finger protein 3	Phf3	17.5784	0.242283				P09602	Hmgn2	Non-histone chromosomal protein HMG-17	Hmgn2	21.1583	0.93337
O88561	Slc27a3	Long-chain fatty acid transport protein 3	Slc27a3	17.8993	0.335892			#N/A	O35382	Exoc4	Exocyst complex component 4	Exoc4	19.7775	0.412029			#N/A	B2RR83	Ythdc2	3'-5' RNA helicase YTHDC2	Ythdc2	17.8331	0.728649				P09803	Cdh1	Cadherin-1	Cdh1	22.2555	0.561671
O88569	Hnrnpa2b1	Heterogeneous nuclear ribonucleoproteins A2/B1	Hnrnpa2b1	24.6671	0.276194			#N/A	O35400	Sult2b1	Sulfotransferase family cytosolic 2B member 1	Sult2b1	19.2476	0.766855			#N/A	B2RS76	Cpb1	Carboxypeptidase B1 (Tissue), isoform CRA_b	Cpb1	21.0536	2.45042				P09925	Surf1	Surfeit locus protein 1	Surf1	19.6338	0.358209
O88587	Comt	Catechol O-methyltransferase	Comt	20.3211	1.7861			#N/A	O35405	Pld3	Phospholipase D3	Pld3	19.5086	0.568782			#N/A	B2RSH2	Gnai1	Guanine nucleotide-binding protein G(i) subunit alpha-1	Gnai1	19.2278	0.162185				P0C605	Prkg1	cGMP-dependent protein kinase 1	Prkg1	19.3787	0.321721
O88593	Pglyrp1	Peptidoglycan recognition protein 1	Pglyrp1	19.4437	0.934904			#N/A	O35425	Bok	Bcl-2-related ovarian killer protein	Bok	17.8728	0.305964			#N/A	B2RUP2	Unc13d	Protein unc-13 homolog D	Unc13d	16.9091	0.3885				P0C7T6	Atxn1l	Ataxin-1-like	Atxn1l	18.5953	0.51209
O88630	Gosr1	Golgi SNAP receptor complex member 1	Gosr1	19.1857	0.0847838			#N/A	O35435	Dhodh	Dihydroorotate dehydrogenase (quinone), mitochondrial	Dhodh	20.0187	0.900966			#N/A	B2RUR4	Kprp	Keratinocyte proline-rich protein	Kprp	17.9544	0.726109				P0CG14	Chtf8	Chromosome transmission fidelity protein 8 homolog isoform 2	Chtf8	18.3611	0.824695
O88653	Lamtor3	Ragulator complex protein LAMTOR3	Lamtor3	18.618	0.784573			#N/A	O35452	Tnxb	Tenascin X	Tnxb	22.0676	0.404231			#N/A	B2RUR8	Otud7b	OTU domain-containing protein 7B	Otud7b	18.442	0.394503				P0DN34	Ndufb1	NADH dehydrogenase [ubiquinone] 1 beta subcomplex subunit 1	Ndufb1	18.7597	0.535808
O88673	Dgka	Diacylglycerol kinase alpha	Dgka	17.4652	0.796017			#N/A	O35459	Ech1	Delta(3,5)-Delta(2,4)-dienoyl-CoA isomerase, mitochondrial	Ech1	21.1516	0.350225			#N/A	B2RV77	Gm5483	MCG130182, isoform CRA_a	Gm5483	18.6486	0.78143				P0DOV2	Ifi204	Interferon-activable protein 204	Ifi204	19.2463	0.673409
O88685	Psmc3	26S proteasome regulatory subunit 6A	Psmc3	21.3181	0.36584			#N/A	O35465	Fkbp8	Peptidyl-prolyl cis-trans isomerase FKBP8	Fkbp8	19.0585	0.693944			#N/A	B2RW88	Prr19	Proline-rich 19	Prr19	20.0211	0.347996				P0DP26;P0DP27;P0DP28	Calm1;Calm2;Calm3	Calmodulin-1	Calm1	26.9603	0.825496
O88696	Clpp	ATP-dependent Clp protease proteolytic subunit, mitochondrial	Clpp	21.6945	0.203621			#N/A	O35593	Psmd14	26S proteasome non-ATPase regulatory subunit 14	Psmd14	21.2756	0.631422			#N/A	B2RWS6	Ep300	Histone acetyltransferase p300	Ep300	17.4078	0.647634				P10126	Eef1a1	Elongation factor 1-alpha 1	Eef1a1	27.4769	0.183235
O88712	Ctbp1	C-terminal-binding protein 1	Ctbp1	20.5938	0.451482			#N/A	O35598	Adam10	Disintegrin and metalloproteinase domain-containing protein 10	Adam10	20.314	0.570718			#N/A	B2RX12	Abcc3	Canalicular multispecific organic anion transporter 2	Abcc3	19.4816	0.615966				P10493	Nid1	Nidogen-1	Nid1	24.2295	0.488074
O88735	Map7	Ensconsin	Map7	19.7514	0.550744			#N/A	O35609	Scamp3	Secretory carrier-associated membrane protein 3	Scamp3	18.7312	1.06309			#N/A	B2RXC1	Trappc11	Trafficking protein particle complex subunit 11	Trappc11	18.3032	0.37692				P10518	Alad	Delta-aminolevulinic acid dehydratase	Alad	19.7849	0.379878
O88738	Birc6	Baculoviral IAP repeat-containing protein 6	Birc6	18.9764	0.119333			#N/A	O35638	Stag2	Cohesin subunit SA-2	Stag2	18.7521	0.508724			#N/A	B2RXC2	Itpkb	Kinase	Itpkb	19.0112	0.252472				P10605	Ctsb	Cathepsin B	Ctsb	21.0896	0.778998
O88746	Tom1	Target of Myb protein 1	Tom1	21.0229	0.487413			#N/A	O35639	Anxa3	Annexin A3	Anxa3	23.8052	1.03454			#N/A	B2RXC6	Polr3a	DNA-directed RNA polymerase subunit	Polr3a	17.5932	1.19267				P10630	Eif4a2	Eukaryotic initiation factor 4A-II	Eif4a2	20.3938	0.884326
O88796	Rpp30	Ribonuclease P protein subunit p30	Rpp30	17.4185	0.609741			#N/A	O35640	Anxa8	Annexin A8	Anxa8	19.0321	0.728532			#N/A	B2RXQ2	Ppfia1	Ppfia1 protein	Ppfia1	18.5675	0.319995				P10637	Mapt	Microtubule-associated protein tau	Mapt	18.6156	0.625781
O88811	Stam2	Signal transducing adapter molecule 2	Stam2	19.185	0.706999			#N/A	O35643	Ap1b1	AP-1 complex subunit beta-1	Ap1b1	21.4948	0.108679			#N/A	B2RXR6	Ankrd44	Serine/threonine-protein phosphatase 6 regulatory ankyrin repeat subunit B	Ankrd44	17.9646	0.289863				P10639	Txn	Thioredoxin	Txn	26.279	1.06761
O88845	Akap10	A-kinase anchor protein 10, mitochondrial	Akap10	16.3443	1.9274			#N/A	O35654	Pold2	DNA polymerase delta subunit 2	Pold2	17.8552	1.09772			#N/A	B2RXS4	Plxnb2	Plexin-B2	Plxnb2	21.2712	0.167196				P10649	Gstm1	Glutathione S-transferase Mu 1	Gstm1	24.6979	0.369719
O88851	Rbbp9	Putative hydrolase RBBP9	Rbbp9	20.2037	0.350901			#N/A	O35680	Mrps12	28S ribosomal protein S12, mitochondrial	Mrps12	18.3275	0.849957			#N/A	B2RY56	Rbm25	RNA-binding protein 25	Rbm25	20.9421	0.285513				P10711	Tcea1	Transcription elongation factor A protein 1	Tcea1	21.2549	0.453152
O88874	Ccnk	Cyclin-K	Ccnk	19.1164	1.24544			#N/A	O35682	Myadm	Myeloid-associated differentiation marker	Myadm	19.7878	0.197547			#N/A	B5THE2	Mgam	Maltase-glucoamylase	Mgam	19.4062	0.513019				P10833	Rras	Ras-related protein R-Ras	Rras	22.0676	0.993073
O88879	Apaf1	Apoptotic protease-activating factor 1	Apaf1	18.8707	0.880708			#N/A	O35685	Nudc	Nuclear migration protein nudC	Nudc	20.5938	0.802393			#N/A	B7ZMP1	Xpnpep3	Xaa-Pro aminopeptidase 3	Xpnpep3	17.7426	0.430894				P10854	Hist1h2bm	Histone H2B type 1-M	Hist1h2bm	28.8649	0.787373
O88935	Syn1	Synapsin-1	Syn1	19.0531	0.550483			#N/A	O35730	Ring1	E3 ubiquitin-protein ligase RING1	Ring1	18.5483	0.365981			#N/A	B8JK39	Itga9	Integrin alpha-9	Itga9	16.6792	3.09268				P10922	H1f0	Histone H1.0	H1f0	25.267	0.43305
O88939	Zbtb7a	Zinc finger and BTB domain-containing protein 7A	Zbtb7a	17.1819	0.282272			#N/A	O35737	Hnrnph1	Heterogeneous nuclear ribonucleoprotein H	Hnrnph1	22.8377	0.380216			#N/A	B8ZXI1	Qtrt2	Queuine tRNA-ribosyltransferase accessory subunit 2	Qtrt2	17.2252	0.592307				P11031	Sub1	Activated RNA polymerase II transcriptional coactivator p15	Sub1	23.576	1.21674
O88952	Lin7c	Protein lin-7 homolog C	Lin7c	21.944	0.578441			#N/A	O35841	Api5	Apoptosis inhibitor 5	Api5	20.541	0.501976			#N/A	B9EJ80	Pdzd8	PDZ domain-containing protein 8	Pdzd8	18.277	0.190912				P11087	Col1a1	Collagen alpha-1(I) chain	Col1a1	28.679	0.538964
O88967	Yme1l1	ATP-dependent zinc metalloprotease YME1L1	Yme1l1	18.0833	0.373894			#N/A	O35855	Bcat2	Branched-chain-amino-acid aminotransferase, mitochondrial	Bcat2	20.826	0.520467			#N/A	B9EJ86	Osbpl8	Oxysterol-binding protein-related protein 8	Osbpl8	18.7757	0.582729				P11088	Flg	Filaggrin (Fragment)	Flg	22.5204	0.817623
O88983	Stx8	Syntaxin-8	Stx8	19.1539	0.407147			#N/A	O35857	Timm44	Mitochondrial import inner membrane translocase subunit TIM44	Timm44	19.7542	1.08335			#N/A	B9EJR8	Dnaaf5	Dynein assembly factor 5, axonemal	Dnaaf5	18.6248	0.43459				P11247	Mpo	Myeloperoxidase	Mpo	20.3634	1.36346
O88986	Gcat	2-amino-3-ketobutyrate coenzyme A ligase, mitochondrial	Gcat	17.58	1.43346			#N/A	O35864	Cops5	COP9 signalosome complex subunit 5	Cops5	20.3104	0.451755			#N/A	B9EKI3	Tmf1	TATA element modulatory factor	Tmf1	18.889	0.556849				P11352	Gpx1	Glutathione peroxidase 1	Gpx1	22.1646	0.778559
O88990	Actn3	Alpha-actinin-3	Actn3	23.3389	1.91553			#N/A	O35887	Calu	Calumenin	Calu	22.8361	0.248977			#N/A	C0HKD8;C0HKD9	Mfap1a;Mfap1b	Microfibrillar-associated protein 1A	Mfap1a	19.3384	0.268509				P11438	Lamp1	Lysosome-associated membrane glycoprotein 1	Lamp1	19.7101	0.960413
O89016	Abcd4	ATP-binding cassette sub-family D member 4	Abcd4	18.7271	0.243504			#N/A	O35900	Lsm2	U6 snRNA-associated Sm-like protein LSm2	Lsm2	19.454	0.927986			#N/A	C0HKE1;C0HKE2;C0HKE3;C0HKE4;C0HKE5;C0HKE6;C0HKE7;C0HKE8;C0HKE9;Q8BFU2;Q8CGP5;Q8CGP6;Q8CGP7	Hist1h2ab;Hist1h2ac;Hist1h2ad;Hist1h2ae;Hist1h2af;Hist1h2ag;Hist1h2ah;Hist1h2ai;Hist1h2ak;Hist1h2an;Hist1h2ao;Hist1h2ap;Hist3h2a	Histone H2A type 1-B	Hist1h2ab	29.2696	0.885884				P11440	Cdk1	Cyclin-dependent kinase 1	Cdk1	20.0573	1.1509
O89017	Lgmn	Legumain	Lgmn	17.0425	0.858148			#N/A	O35943	Fxn	Frataxin, mitochondrial	Fxn	17.9449	0.862248			#N/A	C0HKG5;C0HKG6	Rnaset2a;Rnaset2b	Ribonuclease T2-A	Rnaset2a	16.778	1.1184				P11499	Hsp90ab1	Heat shock protein HSP 90-beta	Hsp90ab1	25.4747	0.448931
O89023	Tpp1	Tripeptidyl-peptidase 1	Tpp1	18.8176	0.463971			#N/A	O35945	Aldh1a7	Aldehyde dehydrogenase, cytosolic 1	Aldh1a7	19.0937	0.307285			#N/A	D3YU50	Mybpc1	Myosin-binding protein C, slow-type	Mybpc1	22.186	0.900947				P11531	Dmd	Dystrophin	Dmd	20.1078	0.359614
O89029	Matn4	Matrilin-4	Matn4	19.4227	0.302709			#N/A	O35963	Rab33b	Ras-related protein Rab-33B	Rab33b	17.2734	0.940426			#N/A	D3YX43	Vsig10	V-set and immunoglobulin domain-containing protein 10	Vsig10	19.0892	0.473962				P11627	L1cam	Neural cell adhesion molecule L1	L1cam	20.6982	0.483567
O89051	Itm2b	Integral membrane protein 2B	Itm2b	19.3745	0.188224			#N/A	O35969	Gamt	Guanidinoacetate N-methyltransferase	Gamt	18.7302	0.539264			#N/A	D3YXJ5	Fam84b	Family with sequence similarity 84, member B	Fam84b	18.0322	1.12975				P11679	Krt8	Keratin, type II cytoskeletal 8	Krt8	28.9789	0.770991
O89053	Coro1a	Coronin-1A	Coro1a	22.1441	0.675468			#N/A	O35972	Mrpl23	39S ribosomal protein L23, mitochondrial	Mrpl23	18.3364	0.71631			#N/A	D3YXK1	Samd1	Atherin	Samd1	17.5266	0.479446				P11835	Itgb2	Integrin beta-2	Itgb2	19.9504	0.87983
O89079	Cope	Coatomer subunit epsilon	Cope	22.7316	0.409102			#N/A	O35988	Sdc4	Syndecan-4	Sdc4	20.1416	0.665057			#N/A	D3YZP9	Ccdc6	Coiled-coil domain-containing protein 6	Ccdc6	19.7438	0.271549				P11881	Itpr1	Inositol 1,4,5-trisphosphate receptor type 1	Itpr1	18.0474	0.367403
O89086	Rbm3	RNA-binding protein 3	Rbm3	23.6026	0.684823			#N/A	O54692	Zw10	Centromere/kinetochore protein zw10 homolog	Zw10	17.3411	0.741508			#N/A	D3YZZ5	Tmed7	Transmembrane p24-trafficking protein 7	Tmed7	19.4191	0.644129				P11928	Oas1a	2'-5'-oligoadenylate synthase 1A	Oas1a	19.3447	1.14705
O89094	Casp14	Caspase-14	Casp14	20.656	0.674176			#N/A	O54724	Cavin1	Caveolae-associated protein 1	Cavin1	24.1742	0.318063			#N/A	D3Z0M9	Ddx23	DEAD (Asp-Glu-Ala-Asp) box polypeptide 23	Ddx23	19.9978	0.255208				P11930	Nudt19	Nucleoside diphosphate-linked moiety X motif 19	Nudt19	19.8773	0.795224
O89104	Sypl2	Synaptophysin-like protein 2	Sypl2	17.6438	0.0914278			#N/A	O54734	Ddost	Dolichyl-diphosphooligosaccharide--protein glycosyltransferase 48 kDa subunit	Ddost	23.2639	0.382503			#N/A	D3Z286	Tmppe	Transmembrane protein with metallophosphoesterase domain	Tmppe	18.8718	0.640733				P11983	Tcp1	T-complex protein 1 subunit alpha	Tcp1	23.5463	0.400715
O89106	Fhit	Bis(5'-adenosyl)-triphosphatase	Fhit	18.2912	0.980684			#N/A	O54774	Ap3d1	AP-3 complex subunit delta-1	Ap3d1	19.9249	0.581344			#N/A	D3Z2H9	Tpm3-rs7	Uncharacterized protein	Tpm3-rs7	24.092	0.284336				P12023	App	Amyloid-beta A4 protein	App	18.418	0.575078
O89110	Casp8	Caspase-8	Casp8	19.2578	0.471492			#N/A	O54782	Man2b2	Epididymis-specific alpha-mannosidase	Man2b2	18.8972	0.535929			#N/A	D3Z3L3	Trim12c	Tripartite motif-containing 12C	Trim12c	19.4642	0.516531				P12246	Apcs	Serum amyloid P-component	Apcs	20.6515	2.00254
O89112	Lancl1	LanC-like protein 1	Lancl1	19.3204	0.437576			#N/A	O54784	Dapk3	Death-associated protein kinase 3	Dapk3	19.1828	0.737202			#N/A	D3Z3N4	Hnrnph3	Heterogeneous nuclear ribonucleoprotein H3	Hnrnph3	20.1797	0.277663				P12367	Prkar2a	cAMP-dependent protein kinase type II-alpha regulatory subunit	Prkar2a	21.0279	0.755152
O89114	Dnajb5	DnaJ homolog subfamily B member 5	Dnajb5	19.2286	0.61025			#N/A	O54785	Limk2	LIM domain kinase 2	Limk2	19.4076	0.519305			#N/A	D3Z4S3	Ptrhd1	Putative peptidyl-tRNA hydrolase PTRHD1	Ptrhd1	19.4359	0.478173				P12787	Cox5a	Cytochrome c oxidase subunit 5A, mitochondrial	Cox5a	24.3084	0.306614
P00158	Mt-Cyb	Cytochrome b	Mt-Cyb	19.0049	0.750817			#N/A	O54786	Dffa	DNA fragmentation factor subunit alpha	Dffa	18.3101	0.512854			#N/A	D3Z6P0	Pdia2	Protein disulfide-isomerase A2	Pdia2	19.656	1.86862				P12815	Pdcd6	Programmed cell death protein 6	Pdcd6	20.1256	0.747226
P00329	Adh1	Alcohol dehydrogenase 1	Adh1	25.9052	0.577038			#N/A	O54825	Bysl	Bystin	Bysl	18.3347	0.773795			#N/A	D3Z6V6	Enpp7	Ectonucleotide pyrophosphatase/phosphodiesterase 7	Enpp7	17.8826	1.68553				P12961	Scg5	Neuroendocrine protein 7B2	Scg5	20.9351	1.36531
P00375	Dhfr	Dihydrofolate reductase	Dhfr	20.1175	0.433647			#N/A	O54833	Csnk2a2	Casein kinase II subunit alpha'	Csnk2a2	20.0122	0.417692			#N/A	D3Z7X0	Acad12	Acyl-Coenzyme A dehydrogenase family, member 12	Acad12	19.5146	0.601664				P12970	Rpl7a	60S ribosomal protein L7a	Rpl7a	24.2338	0.381646
P00405	Mtco2	Cytochrome c oxidase subunit 2	Mtco2	25.9349	0.155227			#N/A	O54865	Gucy1b1	Guanylate cyclase soluble subunit beta-1	Gucy1b1	19.5128	1.11379			#N/A	D4AFX7	Dnajc13	DnaJ heat shock protein family (Hsp40) member C13	Dnajc13	20.1834	0.146963				P13011;P13516;Q99PL7	Scd1;Scd2;Scd3	Acyl-CoA desaturase 2	Scd1	18.572	0.9004
P00416	mt-Co3	Cytochrome c oxidase subunit 3	mt-Co3	19.4393	1.28463			#N/A	O54879	Hmgb3	High mobility group protein B3	Hmgb3	20.4898	0.614281			#N/A	E0CZ22	Mroh1	Maestro heat-like repeat family member 1	Mroh1	17.5649	0.53043				P13020	Gsn	Gelsolin	Gsn	25.0615	0.484323
P00493	Hprt1	Hypoxanthine-guanine phosphoribosyltransferase	Hprt1	21.1392	0.306186			#N/A	O54916	Reps1	RalBP1-associated Eps domain-containing protein 1	Reps1	18.2538	0.694318			#N/A	E2JF22	Piezo1	Piezo-type mechanosensitive ion channel component 1	Piezo1	17.521	0.568665				P13412	Tnni2	Troponin I, fast skeletal muscle	Tnni2	21.0564	1.64775
P00920	Ca2	Carbonic anhydrase 2	Ca2	25.8348	0.27873			#N/A	O54931	Akap2	A-kinase anchor protein 2	Akap2	20.7309	0.246897			#N/A	E9PUR0	Ankhd1	Ankyrin repeat and KH domain-containing 1	Ankhd1	18.8071	0.844341				P13439	Umps	Uridine 5'-monophosphate synthase	Umps	19.0355	0.878468
P01027	C3	Complement C3	C3	20.817	0.243782			#N/A	O54941	Smarce1	SWI/SNF-related matrix-associated actin-dependent regulator of chromatin subfamily E member 1	Smarce1	19.5002	0.548115			#N/A	E9PV24	Fga	Fibrinogen alpha chain	Fga	24.9914	0.969538				P13542	Myh8	Myosin-8	Myh8	23.6655	1.02013
P01029	C4b	Complement C4-B	C4b	18.6245	0.893704			#N/A	O54946	Dnajb6	DnaJ homolog subfamily B member 6	Dnajb6	19.1153	0.584982			#N/A	E9PV38	Ces2g	Carboxylic ester hydrolase	Ces2g	17	0.945485				P13595	Ncam1	Neural cell adhesion molecule 1	Ncam1	20.5776	0.615263
P01592	Jchain	Immunoglobulin J chain	Jchain	20.127	0.425053			#N/A	O54950	Prkag1	5'-AMP-activated protein kinase subunit gamma-1	Prkag1	20.0484	0.284694			#N/A	E9PVA8	Gcn1	eIF-2-alpha kinase activator GCN1	Gcn1	21.0827	0.289447				P13634	Ca1	Carbonic anhydrase 1	Ca1	24.8202	1.09135
P01631	-	Ig kappa chain V-II region 26-10	-	21.0189	0.725187			#N/A	O54962	Banf1	Barrier-to-autointegration factor	Banf1	22.4316	1.21709			#N/A	E9PVD3	Dchs1	Protocadherin-16	Dchs1	15.6797	0.707431				P13707	Gpd1	Glycerol-3-phosphate dehydrogenase [NAD(+)], cytoplasmic	Gpd1	21.9909	0.999805
P01633	Igk-V19-17	Ig kappa chain V19-17	Igk-V19-17	20.0856	1.15898			#N/A	O54974	Lgals7	Galectin-7	Lgals7	24.7246	1.04156			#N/A	E9PVG8	9530053A07Rik	RIKEN cDNA 9530053A07 gene	9530053A07Rik	17.7266	2.07667				P13745	Gsta1	Glutathione S-transferase A1	Gsta1	20.7818	0.582548
P01642	Gm10881	Ig kappa chain V-V region L7 (Fragment)	Gm10881	18.92	0.722455			#N/A	O54984	Asna1	ATPase Asna1	Asna1	20.892	0.756256			#N/A	E9PVX6	Mki67	Proliferation marker protein Ki-67	Mki67	19.2515	0.222717				P14069	S100a6	Protein S100-A6	S100a6	25.5238	0.924495
P01660	-	Ig kappa chain V-III region PC 3741/TEPC 111	-	18.1687	0.717354			#N/A	O54988	Slk	STE20-like serine/threonine-protein kinase	Slk	20.6054	0.83079			#N/A	E9PVZ8	Golgb1	Golgi autoantigen, golgin subfamily b, macrogolgin 1	Golgb1	19.6891	0.253556				P14094	Atp1b1	Sodium/potassium-transporting ATPase subunit beta-1	Atp1b1	23.5698	1.12681
P01680	-	Ig kappa chain V-IV region S107B	-	20.2726	0.117216			#N/A	O54992	Mapkapk5	MAP kinase-activated protein kinase 5	Mapkapk5	19.7494	0.686349			#N/A	E9PWG6	Ncapg	Non-SMC condensin I complex, subunit G	Ncapg	18.4702	0.881349				P14115	Rpl27a	60S ribosomal protein L27a	Rpl27a	23.4578	0.560786
P01723;P01727	-	Ig lambda-1 chain V region		20.8778	0.511154			#N/A	O55013	Trappc3	Trafficking protein particle complex subunit 3	Trappc3	21.2584	0.691854			#N/A	E9PWP9	4931408C20Rik	RIKEN cDNA 4931408C20 gene	4931408C20Rik	19.6832	0.608042				P14131	Rps16	40S ribosomal protein S16	Rps16	24.398	0.986414
P01831	Thy1	Thy-1 membrane glycoprotein	Thy1	20.7416	0.365671			#N/A	O55022	Pgrmc1	Membrane-associated progesterone receptor component 1	Pgrmc1	22.4776	0.425833			#N/A	E9PWQ3	Col6a3	Collagen, type VI, alpha 3	Col6a3	25.9999	0.279093				P14148	Rpl7	60S ribosomal protein L7	Rpl7	24.7394	0.419729
P01837	Igkc	Immunoglobulin kappa constant	Igkc	21.3652	0.286179			#N/A	O55023	Impa1	Inositol monophosphatase 1	Impa1	21.7653	0.704831			#N/A	E9PWW9	Rsf1	Remodeling and spacing factor 1	Rsf1	15.5664	0.522454				P14152	Mdh1	Malate dehydrogenase, cytoplasmic	Mdh1	23.9211	0.798403
P01864	-	Ig gamma-2A chain C region secreted form	-	17.7903	1.44208			#N/A	O55026	Entpd2	Ectonucleoside triphosphate diphosphohydrolase 2	Entpd2	21.2821	0.502436			#N/A	E9PWZ3	Rpl3l	Ribosomal protein L3-like	Rpl3l	18.7689	2.00678				P14206	Rpsa	40S ribosomal protein SA	Rpsa	24.1671	0.772847
P01867	Igh-3	Ig gamma-2B chain C region	Igh-3	20.2617	0.7171			#N/A	O55028	Bckdk	[3-methyl-2-oxobutanoate dehydrogenase [lipoamide]] kinase, mitochondrial	Bckdk	19.4981	1.3817			#N/A	E9PX68	Slc4a1ap	Solute carrier family 4 (anion exchanger), member 1, adaptor protein	Slc4a1ap	19.0901	0.703964				P14211	Calr	Calreticulin	Calr	23.5885	0.311483
P01869	Ighg1	Ig gamma-1 chain C region, membrane-bound form	Ighg1	18.9893	1.39033			#N/A	O55029	Copb2	Coatomer subunit beta'	Copb2	23.7156	0.119032			#N/A	E9PX95	Abca17	ATP-binding cassette sub-family A member 17	Abca17	20.8513	0.0420656				P14429	H2-Q7	H-2 class I histocompatibility antigen, Q7 alpha chain	H2-Q7	19.9484	1.54542
P01872	Ighm	Immunoglobulin heavy constant mu	Ighm	19.1311	1.69118			#N/A	O55033	Nck2	Cytoplasmic protein NCK2	Nck2	19.0364	0.457939			#N/A	E9PXF8	Sbf2	SET-binding factor 2	Sbf2	16.6485	0.324556				P14576	Srp54	Signal recognition particle 54 kDa protein	Srp54	19.6962	0.74205
P01887	B2m	Beta-2-microglobulin	B2m	23.5928	0.60793			#N/A	O55060	Tpmt	Thiopurine S-methyltransferase	Tpmt	17.784	1.8522			#N/A	E9PY03	Tstd1	Thiosulfate sulfurtransferase (rhodanese)-like domain-containing 1	Tstd1	18.5746	0.593564				P14602	Hspb1	Heat shock protein beta-1	Hspb1	25.01	0.732675
P01897	H2-L	H-2 class I histocompatibility antigen, L-D alpha chain	H2-L	20.4165	0.319523			#N/A	O55100	Syngr1	Synaptogyrin-1	Syngr1	17.7506	0.371954			#N/A	E9PY16	Adap1	ArfGAP with dual PH domains 1	Adap1	17.5522	0.357768				P14685	Psmd3	26S proteasome non-ATPase regulatory subunit 3	Psmd3	21.5623	0.181031
P01921	H2-Ab1	H-2 class II histocompatibility antigen, A-D beta chain	H2-Ab1	20.2459	0.744179			#N/A	O55101	Syngr2	Synaptogyrin-2	Syngr2	20.8371	0.629078			#N/A	E9PYB0	Ahnak2	AHNAK nucleoprotein 2 (Fragment)	Ahnak2	21.9786	0.393811				P14824	Anxa6	Annexin A6	Anxa6	23.5788	0.559962
P01942	Hba	Hemoglobin subunit alpha	Hba	25.3909	0.440441			#N/A	O55106	Strn	Striatin	Strn	20.5089	0.756721			#N/A	E9PYD1	Fam98c	Family with sequence similarity 98, member C	Fam98c	19.6037	0.513258				P14869	Rplp0	60S acidic ribosomal protein P0	Rplp0	23.0851	0.333216
P02463	Col4a1	Collagen alpha-1(IV) chain	Col4a1	22.927	0.523192			#N/A	O55111	Dsg2	Desmoglein-2	Dsg2	22.1171	0.426932			#N/A	E9PYF4	Lmo7	LIM domain only 7	Lmo7	21.2172	0.390293				P14873	Map1b	Microtubule-associated protein 1B	Map1b	19.8513	0.464333
P02468	Lamc1	Laminin subunit gamma-1	Lamc1	24.0444	0.178143			#N/A	O55125	Nipsnap1	Protein NipSnap homolog 1	Nipsnap1	22.7854	0.449664			#N/A	E9PYH6	Setd1a	SET domain-containing 1A	Setd1a	16.5693	0.57776				P15089	Cpa3	Mast cell carboxypeptidase A	Cpa3	19.2169	1.06358
P02469	Lamb1	Laminin subunit beta-1	Lamb1	22.7286	0.153743			#N/A	O55126	Nipsnap2	Protein NipSnap homolog 2	Nipsnap2	22.4916	0.461185			#N/A	E9PYK3	Parp4	Poly [ADP-ribose] polymerase	Parp4	19.5875	0.31947				P15208	Insr	Insulin receptor	Insr	18.5949	0.586312
P02535	Krt10	Keratin, type I cytoskeletal 10	Krt10	25.201	1.12864			#N/A	O55128	Sap18	Histone deacetylase complex subunit SAP18	Sap18	20.5468	0.838686			#N/A	E9PYP2	Nbeal1	Neurobeachin-like 1	Nbeal1	18.5079	0.374074				P15306	Thbd	Thrombomodulin	Thbd	17.605	0.837898
P03888	Mtnd1	NADH-ubiquinone oxidoreductase chain 1	Mtnd1	17.0293	0.990029			#N/A	O55131	2007-09-01	Septin-7	2007-09-01	22.5235	0.602559			#N/A	E9PZ26	Brd1	Bromodomain-containing 1	Brd1	16.9856	1.24588				P15327	Bpgm	Bisphosphoglycerate mutase	Bpgm	17.9814	0.703176
P03911	Mtnd4	NADH-ubiquinone oxidoreductase chain 4	Mtnd4	19.7808	0.658486			#N/A	O55142	Rpl35a	60S ribosomal protein L35a	Rpl35a	22.5868	0.386751			#N/A	E9PZJ8	Ascc3	Activating signal cointegrator 1 complex subunit 3	Ascc3	19.7297	1.30414				P15331	Prph	Peripherin	Prph	22.9894	0.436075
P03953	Cfd	Complement factor D	Cfd	18.1105	0.285284			#N/A	O55143	Atp2a2	Sarcoplasmic/endoplasmic reticulum calcium ATPase 2	Atp2a2	24.9576	1.09559			#N/A	E9PZM4	Chd2	Chromodomain-helicase-DNA-binding protein 2	Chd2	17.1078	0.790799				P15379	Cd44	CD44 antigen	Cd44	17.9954	1.20494
P03958	Ada	Adenosine deaminase	Ada	20.7178	1.08834			#N/A	O55222	Ilk	Integrin-linked protein kinase	Ilk	22.4063	0.311109			#N/A	E9PZM7	Scaf11	SR-related CTD-associated factor 11	Scaf11	18.3605	0.240688				P15508	Sptb	Spectrin beta chain, erythrocytic	Sptb	17.0431	0.517661
P03987	-	Ig gamma-3 chain C region	-	18.5097	1.37365			#N/A	O55229	Chkb	Choline/ethanolamine kinase	Chkb	18.5636	0.843903			#N/A	E9PZP8	Herc1	HECT and RLD domain-containing E3 ubiquitin protein ligase family member 1	Herc1	17.8317	0.29518				P15532	Nme1	Nucleoside diphosphate kinase A	Nme1	22.8148	1.01336
P03995	Gfap	Glial fibrillary acidic protein	Gfap	20.8155	0.300374			#N/A	O55234	Psmb5	Proteasome subunit beta type-5	Psmb5	22.6231	0.14835			#N/A	E9Q0B5	Fcgbp	Fc fragment of IgG-binding protein	Fcgbp	24.288	1.47427				P15626	Gstm2	Glutathione S-transferase Mu 2	Gstm2	21.4931	0.264545
P04104	Krt1	Keratin, type II cytoskeletal 1	Krt1	26.507	0.91444			#N/A	O70133	Dhx9	ATP-dependent RNA helicase A	Dhx9	22.0126	0.235905			#N/A	E9Q0F0	Krt78	Keratin 78	Krt78	21.8782	0.639565				P15702	Spn	Leukosialin	Spn	18.4612	0.596481
P04117	Fabp4	Fatty acid-binding protein, adipocyte	Fabp4	24.7616	0.493686			#N/A	O70152	Dpm1	Dolichol-phosphate mannosyltransferase subunit 1	Dpm1	20.539	0.213858			#N/A	E9Q137	Tex264	Testis-expressed gene 264	Tex264	19.2453	1.67296				P15864	Hist1h1c	Histone H1.2	Hist1h1c	24.8902	0.599708
P04247	Mb	Myoglobin	Mb	23.1949	1.57296			#N/A	O70172	Pip4k2a	Phosphatidylinositol 5-phosphate 4-kinase type-2 alpha	Pip4k2a	20.4683	0.978283			#N/A	E9Q166	Atad2b	ATPase family, AAA domain-containing 2B	Atad2b	21.0845	0.925547				P15920	Atp6v0a2	V-type proton ATPase 116 kDa subunit a isoform 2	Atp6v0a2	19.1024	0.66343
P04342;P04345;Q03740;Q9CXV3	Cryga;Crygd;Cryge;Crygf	Gamma-crystallin D	Cryga	22.8916	0.213595			#N/A	O70194	Eif3d	Eukaryotic translation initiation factor 3 subunit D	Eif3d	21.0209	0.380486			#N/A	E9Q1F5	Myo5c	Myosin VC	Myo5c	18.2777	0.707845				P15947	Klk1	Kallikrein-1	Klk1	22.6071	0.670831
P04627	Araf	Serine/threonine-protein kinase A-Raf	Araf	19.0737	0.594773			#N/A	O70209	Pdlim3	PDZ and LIM domain protein 3	Pdlim3	25.3562	0.582136			#N/A	E9Q1P8	Irf2bp2	Interferon regulatory factor 2-binding protein 2	Irf2bp2	20.4872	0.131212				P16014	Chgb	Secretogranin-1	Chgb	20.7889	0.529997
P04919	Slc4a1	Band 3 anion transport protein	Slc4a1	18.2505	0.842459			#N/A	O70228	Atp9a	Probable phospholipid-transporting ATPase IIA	Atp9a	19.3325	0.204566			#N/A	E9Q1W3	Neb	Nebulin	Neb	22.409	1.13238				P16015	Ca3	Carbonic anhydrase 3	Ca3	25.351	3.60366
P04925	Prnp	Major prion protein	Prnp	19.2938	0.538801			#N/A	O70250	Pgam2	Phosphoglycerate mutase 2	Pgam2	24.1764	0.75886			#N/A	E9Q1Z0	Krt90	Keratin 90	Krt90	18.7467	1.00668				P16045	Lgals1	Galectin-1	Lgals1	24.0619	0.566615
P05063	Aldoc	Fructose-bisphosphate aldolase C	Aldoc	19.1218	0.461037			#N/A	O70251	Eef1b	Elongation factor 1-beta	Eef1b	21.576	0.812657			#N/A	E9Q238	Kank1	KN motif and ankyrin repeat domains 1	Kank1	19.1544	0.457304				P16110	Lgals3	Galectin-3	Lgals3	24.1491	0.843651
P05064	Aldoa	Fructose-bisphosphate aldolase A	Aldoa	26.3473	0.62578			#N/A	O70258	Sgce	Epsilon-sarcoglycan	Sgce	20.2267	0.931209			#N/A	E9Q2E4	Hectd4	HECT domain E3 ubiquitin protein ligase 4	Hectd4	17.2682	0.279661				P16125	Ldhb	L-lactate dehydrogenase B chain	Ldhb	21.3545	0.506612
P05132	Prkaca	cAMP-dependent protein kinase catalytic subunit alpha	Prkaca	18.9561	0.779107			#N/A	O70274	Ptp4a2	Protein tyrosine phosphatase type IVA 2	Ptp4a2	20.4073	0.67205			#N/A	E9Q2I4	Elmsan1	ELM2 and Myb/SANT-like domain-containing 1	Elmsan1	15.8159	0.452326				P16254	Srp14	Signal recognition particle 14 kDa protein	Srp14	18.4035	1.23023
P05201	Got1	Aspartate aminotransferase, cytoplasmic	Got1	23.0957	0.348385			#N/A	O70305	Atxn2	Ataxin-2	Atxn2	19.0108	0.737726			#N/A	E9Q2M9	Wdfy4	WD repeat and FYVE domain-containing 4	Wdfy4	17.0798	0.622309				P16330	Cnp	2',3'-cyclic-nucleotide 3'-phosphodiesterase	Cnp	19.3707	0.977724
P05202	Got2	Aspartate aminotransferase, mitochondrial	Got2	24.1358	0.415258			#N/A	O70310	Nmt1	Glycylpeptide N-tetradecanoyltransferase 1	Nmt1	20.4712	1.01608			#N/A	E9Q309	Cep350	Centrosome-associated protein 350	Cep350	16.2823	0.518219				P16332	Mut	Methylmalonyl-CoA mutase, mitochondrial	Mut	19.6914	1.08844
P05366	Saa1	Serum amyloid A-1 protein	Saa1	20.2589	0.389243			#N/A	O70311	Nmt2	Glycylpeptide N-tetradecanoyltransferase 2	Nmt2	16.858	1.23357			#N/A	E9Q394	Akap13	A-kinase anchor protein 13	Akap13	18.8615	0.324224				P16406	Enpep	Glutamyl aminopeptidase	Enpep	19.1574	0.785575
P05555	Itgam	Integrin alpha-M	Itgam	18.082	0.0284798			#N/A	O70318	Epb41l2	Band 4.1-like protein 2	Epb41l2	21.9128	0.54049			#N/A	E9Q3A7	Cdh19	Cadherin 19, type 2	Cdh19	17.6245	0.129671				P16460	Ass1	Argininosuccinate synthase	Ass1	23.1104	0.139246
P05784	Krt18	Keratin, type I cytoskeletal 18	Krt18	25.75	0.28704			#N/A	O70325	Gpx4	Phospholipid hydroperoxide glutathione peroxidase	Gpx4	20.504	0.391714			#N/A	E9Q3E1	Aldh3b2	Aldehyde dehydrogenase family 3 member B2	Aldh3b2	18.5161	1.44224				P16546	Sptan1	Spectrin alpha chain, non-erythrocytic 1	Sptan1	23.4077	0.509968
P05977	Myl1	Myosin light chain 1/3, skeletal muscle isoform	Myl1	26.5265	1.32681			#N/A	O70370	Ctss	Cathepsin S	Ctss	20.9806	1.48269			#N/A	E9Q3G8	Nup153	Nucleoporin 153	Nup153	19.8469	0.243519				P16675	Ctsa	Lysosomal protective protein	Ctsa	20.2908	0.833512
P06151	Ldha	L-lactate dehydrogenase A chain	Ldha	26.8268	0.260039			#N/A	O70378	Emc8	ER membrane protein complex subunit 8	Emc8	20.9197	0.916402			#N/A	E9Q3L2	Pi4ka	Phosphatidylinositol 4-kinase alpha	Pi4ka	20.2169	0.26409				P16858	Gapdh	Glyceraldehyde-3-phosphate dehydrogenase	Gapdh	26.3513	0.43877
P06344	-	H-2 class II histocompatibility antigen, A-U beta chain	-	20.2867	0.838696			#N/A	O70400	Pdlim1	PDZ and LIM domain protein 1	Pdlim1	23.4369	0.645962			#N/A	E9Q409	Prss32	Protease, serine 32	Prss32	20.0669	0.772151				P17047	Lamp2	Lysosome-associated membrane glycoprotein 2	Lamp2	22.5128	0.868122
P06537	Nr3c1	Glucocorticoid receptor	Nr3c1	18.3279	0.569793			#N/A	O70404	Vamp8	Vesicle-associated membrane protein 8	Vamp8	19.5561	0.394132			#N/A	E9Q411	Nbas	Neuroblastoma-amplified sequence	Nbas	18.6316	0.565453				P17095	Hmga1	High mobility group protein HMG-I/HMG-Y	Hmga1	21.1525	1.43566
P06683	C9	Complement component C9	C9	17.3334	0.126289			#N/A	O70423	Aoc3	Membrane primary amine oxidase	Aoc3	24.6143	0.314465			#N/A	E9Q414	Apob	Apolipoprotein B-100	Apob	19.6805	0.664308				P17156	Hspa2	Heat shock-related 70 kDa protein 2	Hspa2	20.9008	0.212471
P06728	Apoa4	Apolipoprotein A-IV	Apoa4	21.1152	0.18119			#N/A	O70433	Fhl2	Four and a half LIM domains protein 2	Fhl2	19.5991	0.421829			#N/A	E9Q4N7	Arid1b	AT-rich interactive domain-containing protein 1B	Arid1b	18.219	1.2839				P17182	Eno1	Alpha-enolase	Eno1	24.0171	0.481043
P06745	Gpi	Glucose-6-phosphate isomerase	Gpi	23.9203	0.267538			#N/A	O70435	Psma3	Proteasome subunit alpha type-3	Psma3	22.292	0.244077			#N/A	E9Q4Z2	Acacb	Acetyl-CoA carboxylase 2	Acacb	17.9214	0.73628				P17183	Eno2	Gamma-enolase	Eno2	20.0531	0.789646
P06800	Ptprc	Receptor-type tyrosine-protein phosphatase C	Ptprc	19.084	0.786132			#N/A	O70439	Stx7	Syntaxin-7	Stx7	19.0349	0.752994			#N/A	E9Q512	Trip11	Thyroid hormone receptor interactor 11	Trip11	19.0356	0.50638				P17225	Ptbp1	Polypyrimidine tract-binding protein 1	Ptbp1	22.2634	0.650081
P06802	Enpp1	Ectonucleotide pyrophosphatase/phosphodiesterase family member 1	Enpp1	17.655	0.28469			#N/A	O70456	Sfn	14-3-3 protein sigma	Sfn	22.003	0.510822			#N/A	E9Q555	Rnf213	E3 ubiquitin-protein ligase RNF213	Rnf213	20.1337	0.167383				P17426	Ap2a1	AP-2 complex subunit alpha-1	Ap2a1	21.0731	0.538208
P06837	Gap43	Neuromodulin	Gap43	18.9418	0.697246			#N/A	O70475	Ugdh	UDP-glucose 6-dehydrogenase	Ugdh	23.6799	0.48577			#N/A	E9Q557	Dsp	Desmoplakin	Dsp	23.2427	0.42346				P17427	Ap2a2	AP-2 complex subunit alpha-2	Ap2a2	21.7985	1.1672
P06909	Cfh	Complement factor H	Cfh	19.1738	0.332078			#N/A	O70481	Ubr1	E3 ubiquitin-protein ligase UBR1	Ubr1	18.1858	0.629701			#N/A	E9Q634	Myo1e	Unconventional myosin-Ie	Myo1e	20.5224	0.117878				P17439	Gba	Glucosylceramidase	Gba	20.5441	0.51404
P07091	S100a4	Protein S100-A4	S100a4	22.5076	0.478396			#N/A	O70493	Snx12	Sorting nexin-12	Snx12	22.0791	0.277305			#N/A	E9Q6D8	C6	Complement component 6	C6	18.1334	0.761843				P17563	Selenbp1	Methanethiol oxidase	Selenbp1	23.9327	1.19695
P07214	Sparc	SPARC	Sparc	20.137	0.079816			#N/A	O70503	Hsd17b12	Very-long-chain 3-oxoacyl-CoA reductase	Hsd17b12	20.2801	0.88294			#N/A	E9Q6E5	Srsf11	Serine/arginine-rich-splicing factor 11	Srsf11	17.771	0.51579				P17665	Cox7c	Cytochrome c oxidase subunit 7C, mitochondrial	Cox7c	20.6161	0.584618
P07309	Ttr	Transthyretin	Ttr	22.5616	0.504577			#N/A	O70548	Tcap	Telethonin	Tcap	19.6538	1.08457			#N/A	E9Q6H8	Plekha5	Pleckstrin homology domain-containing, family A member 5	Plekha5	19.5896	0.351961				P17710	Hk1	Hexokinase-1	Hk1	23.484	0.327269
P07310	Ckm	Creatine kinase M-type	Ckm	27.688	1.101			#N/A	O70551	Srpk1	SRSF protein kinase 1	Srpk1	20.4856	0.461066			#N/A	E9Q6R7	Utrn	Utrophin	Utrn	20.8727	0.342122				P17742	Ppia	Peptidyl-prolyl cis-trans isomerase A	Ppia	24.9586	1.77
P07356	Anxa2	Annexin A2	Anxa2	25.4991	0.28492			#N/A	O70566	Diaph2	Protein diaphanous homolog 2	Diaph2	18.3962	0.165781			#N/A	E9Q735	Ube4a	Ubiquitin conjugation factor E4 A	Ube4a	19.2148	0.379691				P17751	Tpi1	Triosephosphate isomerase	Tpi1	24.1507	0.57565
P07607	Tyms	Thymidylate synthase	Tyms	18.2773	0.445249			#N/A	O70570	Pigr	Polymeric immunoglobulin receptor	Pigr	21.8169	0.522485			#N/A	E9Q784	Zc3h13	Zinc finger CCCH domain-containing protein 13	Zc3h13	18.2051	0.578333				P17809	Slc2a1	Solute carrier family 2, facilitated glucose transporter member 1	Slc2a1	20.6591	0.564322
P07724	Alb	Serum albumin	Alb	26.565	0.23354			#N/A	O70572	Smpd2	Sphingomyelin phosphodiesterase 2	Smpd2	20.6123	0.358004			#N/A	E9Q7E2	Arid2	AT-rich interactive domain-containing protein 2	Arid2	17.6578	0.211869				P17897	Lyz1	Lysozyme C-1	Lyz1	22.5291	1.19151
P07742	Rrm1	Ribonucleoside-diphosphate reductase large subunit	Rrm1	18.2548	0.32564			#N/A	O70583	Mid1	E3 ubiquitin-protein ligase Midline-1	Mid1	17.4912	0.567301			#N/A	E9Q7M2	Tsc22d2	TSC22 domain family, member 2	Tsc22d2	17.019	0.997152				P17918	Pcna	Proliferating cell nuclear antigen	Pcna	20.7517	0.476542
P07744	Krt4	Keratin, type II cytoskeletal 4	Krt4	21.725	0.894546			#N/A	O70589	Cask	Peripheral plasma membrane protein CASK	Cask	19.7955	0.744279			#N/A	E9Q7P9	Cdhr2	Cadherin-related family member 2	Cdhr2	19.7104	0.661888				P18052	Ptpra	Receptor-type tyrosine-protein phosphatase alpha	Ptpra	18.8442	0.22855
P07758	Serpina1a	Alpha-1-antitrypsin 1-1	Serpina1a	20.6517	0.503352			#N/A	O70591	Pfdn2	Prefoldin subunit 2	Pfdn2	20.6301	0.429809			#N/A	E9Q8D0	Dnajc21	DnaJ homolog subfamily C member 21	Dnajc21	17.4817	0.78623				P18242	Ctsd	Cathepsin D	Ctsd	21.8066	0.659382
P07759	Serpina3k	Serine protease inhibitor A3K	Serpina3k	20.6124	0.536983			#N/A	O88207	Col5a1	Collagen alpha-1(V) chain	Col5a1	22.104	0.908097			#N/A	E9Q8I7	Nfxl1	Nuclear transcription factor, X-box-binding-like 1	Nfxl1	18.3407	0.178837				P18419	Svs4	Seminal vesicle secretory protein 4	Svs4	21.9751	1.19391
P07901	Hsp90aa1	Heat shock protein HSP 90-alpha	Hsp90aa1	23.674	0.252266			#N/A	O88291	Znf326	DBIRD complex subunit ZNF326	Znf326	19.2137	0.372792			#N/A	E9Q8I9	Fry	Protein furry homolog	Fry	16.2095	0.93249				P18572	Bsg	Basigin	Bsg	23.6987	1.11719
P08030	Aprt	Adenine phosphoribosyltransferase	Aprt	21.8909	0.274699			#N/A	O88310	Itln1	Intelectin-1a	Itln1	19.2564	0.445905			#N/A	E9Q8T7	Dnah1	Dynein heavy chain 1, axonemal	Dnah1	21.3985	0.24936				P18653	Rps6ka1	Ribosomal protein S6 kinase alpha-1	Rps6ka1	21.826	0.50732
P08032	Spta1	Spectrin alpha chain, erythrocytic 1	Spta1	17.8043	0.73138			#N/A	O88312	Agr2	Anterior gradient protein 2 homolog	Agr2	26.5396	0.999478			#N/A	E9Q912	Rap1gds1	RAP1, GTP-GDP dissociation stimulator 1	Rap1gds1	19.8333	0.183652				P18760	Cfl1	Cofilin-1	Cfl1	25.2071	0.571124
P08071	Ltf	Lactotransferrin	Ltf	19.9297	0.665888			#N/A	O88322	Nid2	Nidogen-2	Nid2	21.4681	0.484047			#N/A	E9Q9B7	Kidins220	Kinase D-interacting substrate 220	Kidins220	16.0281	0.800869				P18872	Gnao1	Guanine nucleotide-binding protein G(o) subunit alpha	Gnao1	21.2361	0.497744
P08074	Cbr2	Carbonyl reductase [NADPH] 2	Cbr2	21.1988	0.330876			#N/A	O88325	Naglu	Alpha-N-acetylglucosaminidase	Naglu	19.0037	0.620704			#N/A	E9Q9K5	Trdn	Triadin	Trdn	20.0662	0.83143				P19001	Krt19	Keratin, type I cytoskeletal 19	Krt19	27.9364	0.734657
P08101	Fcgr2	Low affinity immunoglobulin gamma Fc region receptor II	Fcgr2	18.4538	0.470247			#N/A	O88327	Ctnnal1	Alpha-catulin	Ctnnal1	18.8567	1.04839			#N/A	E9Q9P8;Q8K5C8	Rdh16f1;Rdh9	RDH16 family member 1	Rdh16f1	17.6048	0.533948				P19096	Fasn	Fatty acid synthase	Fasn	22.9039	0.547836
P08113	Hsp90b1	Endoplasmin	Hsp90b1	24.222	0.183606			#N/A	O88329	Myo1a	Unconventional myosin-Ia	Myo1a	22.3402	0.232666			#N/A	E9QA15	Cald1	Caldesmon 1	Cald1	25.2711	0.362613				P19137	Lama1	Laminin subunit alpha-1	Lama1	21.5315	0.730963
P08121	Col3a1	Collagen alpha-1(III) chain	Col3a1	25.9377	0.444686			#N/A	O88342	Wdr1	WD repeat-containing protein 1	Wdr1	24.3825	0.342403			#N/A	E9QAB6	Ptar1	Protein prenyltransferase alpha subunit repeat-containing 1	Ptar1	19.2672	0.179637				P19157	Gstp1	Glutathione S-transferase P 1	Gstp1	23.6183	0.67356
P08207	S100a10	Protein S100-A10	S100a10	19.7813	0.47982			#N/A	O88343	Slc4a4	Electrogenic sodium bicarbonate cotransporter 1	Slc4a4	20.1854	0.169429			#N/A	E9QAE3	Btaf1	B-TFIID TATA-box-binding protein-associated factor 1	Btaf1	18.4189	0.828688				P19182	Ifrd1	Interferon-related developmental regulator 1	Ifrd1	16.6234	1.71499
P08226	Apoe	Apolipoprotein E	Apoe	20.4395	0.745009			#N/A	O88351	Ikbkb	Inhibitor of nuclear factor kappa-B kinase subunit beta	Ikbkb	19.2594	0.48781			#N/A	E9QAP7	Taf4	TATA-box-binding protein-associated factor 4	Taf4	17.6287	0.758263				P19221	F2	Prothrombin	F2	18.7918	2.22341
P08228	Sod1	Superoxide dismutase [Cu-Zn]	Sod1	23.5564	0.572179			#N/A	O88441	Mtx2	Metaxin-2	Mtx2	19.7114	0.633987			#N/A	F2Z3U3	Raph1	Ras association (RalGDS/AF-6) and pleckstrin homology domains 1	Raph1	22.2086	0.444698				P19253	Rpl13a	60S ribosomal protein L13a	Rpl13a	20.4123	0.792143
P08249	Mdh2	Malate dehydrogenase, mitochondrial	Mdh2	25.482	0.236642			#N/A	O88447	Klc1	Kinesin light chain 1	Klc1	19.9103	1.15896			#N/A	F2Z472	Svs3a	Seminal vesicle secretory protein 3A	Svs3a	21.158	1.2439				P19324	Serpinh1	Serpin H1	Serpinh1	20.9562	1.06582
P08551	Nefl	Neurofilament light polypeptide	Nefl	20.5056	0.405792			#N/A	O88448	Klc2	Kinesin light chain 2	Klc2	20.1158	0.54393			#N/A	F6ZDS4	Tpr	Nucleoprotein TPR	Tpr	21.0424	0.084768				P19426	Nelfe	Negative elongation factor E	Nelfe	18.4064	0.304166
P08553	Nefm	Neurofilament medium polypeptide	Nefm	20.0551	0.269227			#N/A	O88451	Rdh7	Retinol dehydrogenase 7	Rdh7	19.863	0.265266			#N/A	F7BJK1	Pcdh1	Protocadherin 1 (Fragment)	Pcdh1	17.4956	0.822816				P19467	Muc13	Mucin-13	Muc13	22.4681	1.56584
P08556	Nras	GTPase NRas	Nras	18.1894	0.341228			#N/A	O88456	Capns1	Calpain small subunit 1	Capns1	21.7295	0.587606			#N/A	F7BWT7	Tspan15	Tetraspanin-15	Tspan15	16.6888	0.440211				P19536	Cox5b	Cytochrome c oxidase subunit 5B, mitochondrial	Cox5b	20.0632	0.906265
P08730	Krt13	Keratin, type I cytoskeletal 13	Krt13	23.1936	1.2314			#N/A	O88487	Dync1i2	Cytoplasmic dynein 1 intermediate chain 2	Dync1i2	22.8164	0.260757			#N/A	F8VPN4	Agl	Amylo-1,6-glucosidase, 4-alpha-glucanotransferase	Agl	21.7305	0.628454				P19639	Gstm3	Glutathione S-transferase Mu 3	Gstm3	21.4221	0.438653
P08752	Gnai2	Guanine nucleotide-binding protein G(i) subunit alpha-2	Gnai2	19.3611	0.324323			#N/A	O88492	Plin4	Perilipin-4	Plin4	21.2799	0.65744			#N/A	F8VPP8	Zc3h7b	Zinc finger CCCH type-containing 7B	Zc3h7b	18.6091	1.58069				P19783	Cox4i1	Cytochrome c oxidase subunit 4 isoform 1, mitochondrial	Cox4i1	23.8272	0.624291
P08775	Polr2a	DNA-directed RNA polymerase II subunit RPB1	Polr2a	19.5345	0.329142			#N/A	O88512	Ap1g2	AP-1 complex subunit gamma-like 2	Ap1g2	20.268	0.640477			#N/A	F8VPU2	Farp1	FERM, ARHGEF and pleckstrin domain-containing protein 1	Farp1	19.2912	0.38842				P19973	Lsp1	Lymphocyte-specific protein 1	Lsp1	20.6277	0.809625
P09036	Spink1	Serine protease inhibitor Kazal-type 1	Spink1	22.1218	0.352707			#N/A	O88520	Shoc2	Leucine-rich repeat protein SHOC-2	Shoc2	18.6394	1.0726			#N/A	F8VQ05	Fryl	FRY-like transcription coactivator	Fryl	18.2017	0.278432				P20040	-	H-2 class II histocompatibility antigen, E-Q beta chain	-	19.8169	0.664611
P09055	Itgb1	Integrin beta-1	Itgb1	23.0982	0.333318			#N/A	O88531	Ppt1	Palmitoyl-protein thioesterase 1	Ppt1	18.6046	0.238342			#N/A	F8VQC1	Srp72	Signal recognition particle subunit SRP72	Srp72	20.1777	0.313849				P20060	Hexb	Beta-hexosaminidase subunit beta	Hexb	21.5095	0.727196
P09103	P4hb	Protein disulfide-isomerase	P4hb	24.3696	0.221072			#N/A	O88532	Zfr	Zinc finger RNA-binding protein	Zfr	18.8533	0.515877			#N/A	F8VQK3	Gucy1a2	Guanylate cyclase 1, soluble, alpha 2	Gucy1a2	16.6592	0.608761				P20065	Tmsb4x	Thymosin beta-4	Tmsb4x	21.5406	1.25715
P09405	Ncl	Nucleolin	Ncl	23.8867	0.192263			#N/A	O88533	Ddc	Aromatic-L-amino-acid decarboxylase	Ddc	19.7508	0.518225			#N/A	F8VQM5	Sis	Sucrase isomaltase (alpha-glucosidase)	Sis	18.5109	1.01642				P20108	Prdx3	Thioredoxin-dependent peroxide reductase, mitochondrial	Prdx3	23.906	0.652176
P09411	Pgk1	Phosphoglycerate kinase 1	Pgk1	24.7419	0.404843			#N/A	O88543	Cops3	COP9 signalosome complex subunit 3	Cops3	21.1593	0.440138			#N/A	G3UW81	Cyp4f40	Cytochrome P450, family 4, subfamily f, polypeptide 40	Cyp4f40	18.2915	0.813671				P20152	Vim	Vimentin	Vim	27.1337	0.580876
P09470	Ace	Angiotensin-converting enzyme	Ace	19.5195	0.683223			#N/A	O88544	Cops4	COP9 signalosome complex subunit 4	Cops4	21.2662	0.149927			#N/A	G3UW82	Myh2	MCG140437, isoform CRA_d	Myh2	23.919	1.24613				P20444	Prkca	Protein kinase C alpha type	Prkca	20.0035	0.303983
P09528	Fth1	Ferritin heavy chain	Fth1	22.3426	0.688932			#N/A	O88545	Cops6	COP9 signalosome complex subunit 6	Cops6	20.7183	0.332918			#N/A	G3X8U3	2210016F16Rik	Queuosine salvage protein	2210016F16Rik	21.5126	0.250017				P20491	Fcer1g	High affinity immunoglobulin epsilon receptor subunit gamma	Fcer1g	19.7371	1.34931
P09541	Myl4	Myosin light chain 4	Myl4	19.6171	1.35385			#N/A	O88569	Hnrnpa2b1	Heterogeneous nuclear ribonucleoproteins A2/B1	Hnrnpa2b1	24.5863	0.292935			#N/A	G3X939	Slc9a3	Sodium/hydrogen exchanger 3	Slc9a3	17.5283	0.511029				P20801	Tnnc2	Troponin C, skeletal muscle	Tnnc2	22.463	1.46011
P09542	Myl3	Myosin light chain 3	Myl3	25.9704	1.30655			#N/A	O88587	Comt	Catechol O-methyltransferase	Comt	20.9881	0.771789			#N/A	G3X972	Sec24c	SEC24 related gene family, member C (S. cerevisiae), isoform CRA_a	Sec24c	21.2125	0.16033				P20918	Plg	Plasminogen	Plg	21.3959	1.21604
P09602	Hmgn2	Non-histone chromosomal protein HMG-17	Hmgn2	20.7346	0.828464			#N/A	O88597	Becn1	Beclin-1	Becn1	18.7968	0.791945			#N/A	G3X982	Aox3	Aldehyde oxidase 3	Aox3	21.0438	0.473618				P21107	Tpm3	Tropomyosin alpha-3 chain	Tpm3	23.292	1.08242
P09803	Cdh1	Cadherin-1	Cdh1	22.4848	0.294871			#N/A	O88630	Gosr1	Golgi SNAP receptor complex member 1	Gosr1	20.6522	1.05215			#N/A	G3X987	Gimap9	GTPase, IMAP family member 9	Gimap9	17.674	0.543717				P21126	Ubl4a	Ubiquitin-like protein 4A	Ubl4a	20.1579	0.273362
P09925	Surf1	Surfeit locus protein 1	Surf1	20.3028	0.506038			#N/A	O88643	Pak1	Serine/threonine-protein kinase PAK 1	Pak1	18.42	0.777983			#N/A	G3X9C2	Nccrp1	F-box only protein 50	Nccrp1	19.6082	1.66848				P21271	Myo5b	Unconventional myosin-Vb	Myo5b	19.9464	0.58053
P0C0A3	Chmp6	Charged multivesicular body protein 6	Chmp6	19.2966	1.13045			#N/A	O88653	Lamtor3	Ragulator complex protein LAMTOR3	Lamtor3	18.2234	0.555856			#N/A	G3X9J0	Sipa1l3	Signal-induced proliferation-associated 1-like protein 3	Sipa1l3	17.4793	0.411149				P21278	Gna11	Guanine nucleotide-binding protein subunit alpha-11	Gna11	21.6452	0.350249
P0C5K1	Sbk2	Serine/threonine-protein kinase SBK2	Sbk2	20.5796	0.256406			#N/A	O88685	Psmc3	26S proteasome regulatory subunit 6A	Psmc3	21.3895	0.54008			#N/A	G3X9V8	Serpinb3a	MCG129038	Serpinb3a	20.305	1.65317				P21279	Gnaq	Guanine nucleotide-binding protein G(q) subunit alpha	Gnaq	19.4261	1.4048
P0C605	Prkg1	cGMP-dependent protein kinase 1	Prkg1	19.7258	0.317363			#N/A	O88696	Clpp	ATP-dependent Clp protease proteolytic subunit, mitochondrial	Clpp	22.1554	0.483084			#N/A	G3X9Y6	Akr1c19	Aldo-keto reductase family 1, member C19	Akr1c19	21.692	0.561965				P21447	Abcb1a	Multidrug resistance protein 1A	Abcb1a	20.6026	0.778182
P0C7T6	Atxn1l	Ataxin-1-like	Atxn1l	18.0679	0.244994			#N/A	O88712	Ctbp1	C-terminal-binding protein 1	Ctbp1	20.6147	0.428986			#N/A	G3X9Z4	Pcf11	Cleavage and polyadenylation factor subunit homolog (S. cerevisiae)	Pcf11	18.6211	0.401646				P21460	Cst3	Cystatin-C	Cst3	19.234	0.53658
P0CG14	Chtf8	Chromosome transmission fidelity protein 8 homolog isoform 2	Chtf8	18.6172	0.609313			#N/A	O88735	Map7	Ensconsin	Map7	20.568	0.477993			#N/A	G5E829	Atp2b1	Plasma membrane calcium-transporting ATPase 1	Atp2b1	21.1383	0.219519				P21550	Eno3	Beta-enolase	Eno3	21.6348	1.02844
P0CW02	Ly6c1	Lymphocyte antigen 6C1	Ly6c1	17.4733	0.240912			#N/A	O88736	Hsd17b7	3-keto-steroid reductase	Hsd17b7	17.2828	0.374442			#N/A	G5E870	Trip12	E3 ubiquitin-protein ligase TRIP12	Trip12	19.5537	0.213243				P21614	Gc	Vitamin D-binding protein	Gc	20.0807	1.00434
P0DN34	Ndufb1	NADH dehydrogenase [ubiquinone] 1 beta subcomplex subunit 1	Ndufb1	19.513	1.25413			#N/A	O88738	Birc6	Baculoviral IAP repeat-containing protein 6	Birc6	18.9478	0.768982			#N/A	G5E895	Akr1b10	Aldo-keto reductase family 1, member B10 (aldose reductase)	Akr1b10	20.9899	0.462527				P21619	Lmnb2	Lamin-B2	Lmnb2	21.9229	0.325064
P0DOV2	Ifi204	Interferon-activable protein 204	Ifi204	18.7738	0.123924			#N/A	O88746	Tom1	Target of Myb protein 1	Tom1	20.8137	0.618498			#N/A	G5E897	Kdelc2	KDEL (Lys-Asp-Glu-Leu) containing 2, isoform CRA_b	Kdelc2	19.2633	0.531896				P21956	Mfge8	Lactadherin	Mfge8	20.1725	0.914547
P0DP26;P0DP27;P0DP28	Calm1;Calm2;Calm3	Calmodulin-1	Calm1	26.411	1.03118			#N/A	O88796	Rpp30	Ribonuclease P protein subunit p30	Rpp30	17.1288	0.804707			#N/A	G5E8J6	Hrc	Histidine rich calcium binding protein, isoform CRA_a	Hrc	16.6995	0.833216				P22005	Penk	Proenkephalin-A	Penk	21.4862	1.93998
P10126	Eef1a1	Elongation factor 1-alpha 1	Eef1a1	27.3535	0.252808			#N/A	O88811	Stam2	Signal transducing adapter molecule 2	Stam2	20.1311	0.731998			#N/A	G5E8K5	Ank3	Ankyrin-3	Ank3	19.838	0.297416				P22315	Fech	Ferrochelatase, mitochondrial	Fech	19.2263	1.90469
P10493	Nid1	Nidogen-1	Nid1	24.2029	0.179247			#N/A	O88851	Rbbp9	Putative hydrolase RBBP9	Rbbp9	19.8071	0.763469			#N/A	G5E8V9	Arfip1	ADP-ribosylation factor-interacting protein 1	Arfip1	21.1015	0.404171				P22599	Serpina1b	Alpha-1-antitrypsin 1-2	Serpina1b	20.624	1.08598
P10518	Alad	Delta-aminolevulinic acid dehydratase	Alad	19.9793	0.480666			#N/A	O88874	Ccnk	Cyclin-K	Ccnk	18.6984	0.739071			#N/A	G5E8Z3	2310050C09Rik	MCG120169	2310050C09Rik	19.2824	1.65327				P22682	Cbl	E3 ubiquitin-protein ligase CBL	Cbl	18.7178	0.254594
P10605	Ctsb	Cathepsin B	Ctsb	20.8259	0.169379			#N/A	O88879	Apaf1	Apoptotic protease-activating factor 1	Apaf1	18.6619	0.706087			#N/A	H3BKP8	9930021J03Rik	RIKEN cDNA 9930021J03 gene	9930021J03Rik	20.7587	0.23564				P22892	Ap1g1	AP-1 complex subunit gamma-1	Ap1g1	20.5414	0.523671
P10630	Eif4a2	Eukaryotic initiation factor 4A-II	Eif4a2	21.0308	0.4648			#N/A	O88895	Hdac3	Histone deacetylase 3	Hdac3	17.5829	0.827485			#N/A	I7HPW8	Myo15b	Myosin XVB	Myo15b	19.9604	0.611784				P22907	Hmbs	Porphobilinogen deaminase	Hmbs	19.5012	0.207764
P10637	Mapt	Microtubule-associated protein tau	Mapt	19.1915	0.632948			#N/A	O88935	Syn1	Synapsin-1	Syn1	18.8435	0.363964			#N/A	J3QN89	Aamp	Angio-associated migratory protein	Aamp	19.0482	0.489495				P23116	Eif3a	Eukaryotic translation initiation factor 3 subunit A	Eif3a	21.3918	0.356998
P10639	Txn	Thioredoxin	Txn	26.3665	0.43994			#N/A	O88939	Zbtb7a	Zinc finger and BTB domain-containing protein 7A	Zbtb7a	17.3507	1.13784			#N/A	O08529	Capn2	Calpain-2 catalytic subunit	Capn2	22.4463	0.178133				P23249	Mov10	Putative helicase MOV-10	Mov10	19.5767	0.563611
P10649	Gstm1	Glutathione S-transferase Mu 1	Gstm1	25.6333	0.367231			#N/A	O88952	Lin7c	Protein lin-7 homolog C	Lin7c	21.2775	0.975096			#N/A	O08532	Cacna2d1	Voltage-dependent calcium channel subunit alpha-2/delta-1	Cacna2d1	22.0915	0.299655				P23475	Xrcc6	X-ray repair cross-complementing protein 6	Xrcc6	18.1307	0.891281
P10711	Tcea1	Transcription elongation factor A protein 1	Tcea1	20.9712	0.224899			#N/A	O88967	Yme1l1	ATP-dependent zinc metalloprotease YME1L1	Yme1l1	17.7414	1.17692			#N/A	O08539	Bin1	Myc box-dependent-interacting protein 1	Bin1	21.9928	0.300695				P23492	Pnp	Purine nucleoside phosphorylase	Pnp	22.0202	0.811208
P10833	Rras	Ras-related protein R-Ras	Rras	22.3531	0.448102			#N/A	O88968	Tcn2	Transcobalamin-2	Tcn2	17.8913	0.688919			#N/A	O08547	Sec22b	Vesicle-trafficking protein SEC22b	Sec22b	21.2269	0.293773				P23506	Pcmt1	Protein-L-isoaspartate(D-aspartate) O-methyltransferase	Pcmt1	19.298	0.518299
P10854	Hist1h2bm	Histone H2B type 1-M	Hist1h2bm	28.7525	0.508584			#N/A	O88983	Stx8	Syntaxin-8	Stx8	18.844	0.820195			#N/A	O08553	Dpysl2	Dihydropyrimidinase-related protein 2	Dpysl2	24.1676	0.216259				P23591	Tsta3	GDP-L-fucose synthase	Tsta3	21.5981	0.807175
P10922	H1f0	Histone H1.0	H1f0	25.8206	0.209378			#N/A	O88990	Actn3	Alpha-actinin-3	Actn3	23.7926	1.36494			#N/A	O08573	Lgals9	Galectin-9	Lgals9	21.7264	0.257127				P23780	Glb1	Beta-galactosidase	Glb1	20.3567	0.194934
P11031	Sub1	Activated RNA polymerase II transcriptional coactivator p15	Sub1	23.2892	0.453818			#N/A	O89016	Abcd4	ATP-binding cassette sub-family D member 4	Abcd4	18.3009	0.333572			#N/A	O08579	Emd	Emerin	Emd	20.4097	0.258832				P23927	Cryab	Alpha-crystallin B chain	Cryab	20.1405	0.691845
P11087	Col1a1	Collagen alpha-1(I) chain	Col1a1	30.1698	0.308448			#N/A	O89017	Lgmn	Legumain	Lgmn	17.0779	1.47385			#N/A	O08582	Gtpbp1	GTP-binding protein 1	Gtpbp1	18.4371	0.280734				P23950	Zfp36l1	mRNA decay activator protein ZFP36L1	Zfp36l1	18.6845	1.23071
P11088	Flg	Filaggrin (Fragment)	Flg	21.9029	2.05636			#N/A	O89023	Tpp1	Tripeptidyl-peptidase 1	Tpp1	18.6793	1.66316			#N/A	O08585	Clta	Clathrin light chain A	Clta	23.1998	0.457622				P24270	Cat	Catalase	Cat	21.2837	0.42537
P11152	Lpl	Lipoprotein lipase	Lpl	16.1928	0.986368			#N/A	O89029	Matn4	Matrilin-4	Matn4	19.9952	0.391119			#N/A	O08586	Pten	Phosphatidylinositol 3,4,5-trisphosphate 3-phosphatase and dual-specificity protein phosphatase PTEN	Pten	19.5362	0.237527				P24369	Ppib	Peptidyl-prolyl cis-trans isomerase B	Ppib	22.9008	0.775458
P11352	Gpx1	Glutathione peroxidase 1	Gpx1	22.607	0.427831			#N/A	O89051	Itm2b	Integral membrane protein 2B	Itm2b	19.0761	0.410398			#N/A	O08599	Stxbp1	Syntaxin-binding protein 1	Stxbp1	20.355	0.408961				P24452	Capg	Macrophage-capping protein	Capg	21.5459	0.608089
P11438	Lamp1	Lysosome-associated membrane glycoprotein 1	Lamp1	18.2565	0.495723			#N/A	O89053	Coro1a	Coronin-1A	Coro1a	21.3787	0.522431			#N/A	O08600	Endog	Endonuclease G, mitochondrial	Endog	20.3848	0.326506				P24472	Gsta4	Glutathione S-transferase A4	Gsta4	23.8479	0.662422
P11499	Hsp90ab1	Heat shock protein HSP 90-beta	Hsp90ab1	25.1376	0.291775			#N/A	O89079	Cope	Coatomer subunit epsilon	Cope	22.5222	0.434148			#N/A	O08601	Mttp	Microsomal triglyceride transfer protein large subunit	Mttp	21.2504	2.34478				P24527	Lta4h	Leukotriene A-4 hydrolase	Lta4h	22.0882	0.378425
P11531	Dmd	Dystrophin	Dmd	20.7261	0.194721			#N/A	O89086	Rbm3	RNA-binding protein 3	Rbm3	23.0112	1.34039			#N/A	O08638	Myh11	Myosin-11	Myh11	27.6974	0.309623				P24547	Impdh2	Inosine-5'-monophosphate dehydrogenase 2	Impdh2	21.2559	0.597423
P11589	Mup2	Major urinary protein 2	Mup2	19.2607	1.34345			#N/A	O89094	Casp14	Caspase-14	Casp14	20.3073	0.356617			#N/A	O08663	Metap2	Methionine aminopeptidase 2	Metap2	21.4928	0.343721				P24549	Aldh1a1	Retinal dehydrogenase 1	Aldh1a1	21.284	0.676719
P11627	L1cam	Neural cell adhesion molecule L1	L1cam	20.9305	0.428169			#N/A	O89106	Fhit	Bis(5'-adenosyl)-triphosphatase	Fhit	18.3867	0.988658			#N/A	O08664	Bcl7c	B-cell CLL/lymphoma 7 protein family member C	Bcl7c	19.2882	0.167648				P24668	M6pr	Cation-dependent mannose-6-phosphate receptor	M6pr	22.4246	0.948655
P11679	Krt8	Keratin, type II cytoskeletal 8	Krt8	29.1221	0.33243			#N/A	O89110	Casp8	Caspase-8	Casp8	19.5584	0.510245			#N/A	O08677	Kng1	Kininogen-1	Kng1	21.2458	0.8584				P24788	Cdk11b	Cyclin-dependent kinase 11B	Cdk11b	19.036	0.88586
P11725	Otc	Ornithine carbamoyltransferase, mitochondrial	Otc	19.7473	0.188884			#N/A	O89112	Lancl1	LanC-like protein 1	Lancl1	19.1106	0.871054			#N/A	O08688	Capn5	Calpain-5	Capn5	19.0749	0.560464				P25206	Mcm3	DNA replication licensing factor MCM3	Mcm3	21.2667	0.39106
P11835	Itgb2	Integrin beta-2	Itgb2	18.297	0.418721			#N/A	O89114	Dnajb5	DnaJ homolog subfamily B member 5	Dnajb5	19.2821	0.617978			#N/A	O08692	Ngp	Neutrophilic granule protein	Ngp	24.4463	1.03602				P25444	Rps2	40S ribosomal protein S2	Rps2	23.5058	0.746306
P11881	Itpr1	Inositol 1,4,5-trisphosphate receptor type 1	Itpr1	19.1221	1.031			#N/A	P00158	Mt-Cyb	Cytochrome b	Mt-Cyb	19.6335	0.864362			#N/A	O08709	Prdx6	Peroxiredoxin-6	Prdx6	24.8349	0.769131				P25911	Lyn	Tyrosine-protein kinase Lyn	Lyn	21.2456	0.202518
P11928	Oas1a	2'-5'-oligoadenylate synthase 1A	Oas1a	20.2984	0.597392			#N/A	P00329	Adh1	Alcohol dehydrogenase 1	Adh1	25.4323	1.54955			#N/A	O08715	Akap1	A-kinase anchor protein 1, mitochondrial	Akap1	18.5651	0.483565				P25976	Ubtf	Nucleolar transcription factor 1	Ubtf	20.1291	0.312752
P11930	Nudt19	Nucleoside diphosphate-linked moiety X motif 19	Nudt19	19.6706	0.825087			#N/A	P00375	Dhfr	Dihydrofolate reductase	Dhfr	20.0162	0.252109			#N/A	O08736	Casp12	Caspase-12	Casp12	16.4152	0.419638				P26040	Ezr	Ezrin	Ezr	23.4455	0.587011
P11983	Tcp1	T-complex protein 1 subunit alpha	Tcp1	23.195	0.296273			#N/A	P00397	Mtco1	Cytochrome c oxidase subunit 1	Mtco1	16.3919	1.89919			#N/A	O08739	Ampd3	AMP deaminase 3	Ampd3	20.7752	0.579336				P26041	Msn	Moesin	Msn	24.0896	0.539571
P12023	App	Amyloid-beta A4 protein	App	18.3143	0.36907			#N/A	P00405	Mtco2	Cytochrome c oxidase subunit 2	Mtco2	25.5895	0.436886			#N/A	O08746	Matn2	Matrilin-2	Matn2	19.2811	0.711686				P26043	Rdx	Radixin	Rdx	20.4046	0.53893
P12367	Prkar2a	cAMP-dependent protein kinase type II-alpha regulatory subunit	Prkar2a	21.3192	0.216381			#N/A	P00416	mt-Co3	Cytochrome c oxidase subunit 3	mt-Co3	20.0606	0.615586			#N/A	O08749	Dld	Dihydrolipoyl dehydrogenase, mitochondrial	Dld	23.7474	0.253168				P26231	Ctnna1	Catenin alpha-1	Ctnna1	23.0995	0.568127
P12787	Cox5a	Cytochrome c oxidase subunit 5A, mitochondrial	Cox5a	25.0749	0.3227			#N/A	P00493	Hprt1	Hypoxanthine-guanine phosphoribosyltransferase	Hprt1	20.6838	0.777399			#N/A	O08756	Hsd17b10	3-hydroxyacyl-CoA dehydrogenase type-2	Hsd17b10	21.6464	0.499338				P26339	Chga	Chromogranin-A	Chga	21.9348	0.793645
P12815	Pdcd6	Programmed cell death protein 6	Pdcd6	20.2967	0.348104			#N/A	P00920	Ca2	Carbonic anhydrase 2	Ca2	25.6869	0.51874			#N/A	O08759	Ube3a	Ubiquitin-protein ligase E3A	Ube3a	20.068	0.157078				P26350	Ptma	Prothymosin alpha	Ptma	23.6029	1.17018
P12960	Cntn1	Contactin-1	Cntn1	16.7259	0.257762			#N/A	P01027	C3	Complement C3	C3	20.4435	0.410864			#N/A	O08788	Dctn1	Dynactin subunit 1	Dctn1	20.8228	0.220391				P26369	U2af2	Splicing factor U2AF 65 kDa subunit	U2af2	21.027	1.01354
P12961	Scg5	Neuroendocrine protein 7B2	Scg5	20.0315	0.516644			#N/A	P01029	C4b	Complement C4-B	C4b	18.3735	0.266486			#N/A	O08795	Prkcsh	Glucosidase 2 subunit beta	Prkcsh	22.7427	0.31587				P26443	Glud1	Glutamate dehydrogenase 1, mitochondrial	Glud1	23.1423	0.618543
P12970	Rpl7a	60S ribosomal protein L7a	Rpl7a	24.3111	0.333506			#N/A	P01592	Jchain	Immunoglobulin J chain	Jchain	18.8152	1.56833			#N/A	O08796	Eef2k	Eukaryotic elongation factor 2 kinase	Eef2k	19.6537	0.390127				P26450	Pik3r1	Phosphatidylinositol 3-kinase regulatory subunit alpha	Pik3r1	19.0115	0.11013
P13020	Gsn	Gelsolin	Gsn	25.5185	0.183637			#N/A	P01631	-	Ig kappa chain V-II region 26-10	-	19.857	1.28783			#N/A	O08804	Serpinb6b	NK13	Serpinb6b	17.3979	0.563467				P26516	Psmd7	26S proteasome non-ATPase regulatory subunit 7	Psmd7	18.5325	0.378528
P13412	Tnni2	Troponin I, fast skeletal muscle	Tnni2	23.68	1.55903			#N/A	P01633	Igk-V19-17	Ig kappa chain V19-17	Igk-V19-17	18.2203	0.656287			#N/A	O08807	Prdx4	Peroxiredoxin-4	Prdx4	24.3781	0.192787				P26618	Pdgfra	Platelet-derived growth factor receptor alpha	Pdgfra	19.2724	0.753761
P13439	Umps	Uridine 5'-monophosphate synthase	Umps	19.3522	0.23957			#N/A	P01642	Gm10881	Ig kappa chain V-V region L7 (Fragment)	Gm10881	19.0216	1.05554			#N/A	O08808	Diaph1	Protein diaphanous homolog 1	Diaph1	20.3454	0.117779				P26638	Sars	Serine--tRNA ligase, cytoplasmic	Sars	21.6721	0.291504
P13541	Myh3	Myosin-3	Myh3	17.9058	1.80591			#N/A	P01644;P01645;P01646;P01647;P01648;P04946	-	Ig kappa chain V-V region HP R16.7	-	21.8878	1.10211			#N/A	O08810	Eftud2	116 kDa U5 small nuclear ribonucleoprotein component	Eftud2	21.0232	0.10496				P27046	Man2a1	Alpha-mannosidase 2	Man2a1	19.907	0.404265
P13542	Myh8	Myosin-8	Myh8	26.7842	1.30137			#N/A	P01723;P01727	-	Ig lambda-1 chain V region		18.0548	0.770381			#N/A	O08832	Galnt4	Polypeptide N-acetylgalactosaminyltransferase 4	Galnt4	19.4782	0.790649				P27546	Map4	Microtubule-associated protein 4	Map4	21.6956	0.660642
P13595	Ncam1	Neural cell adhesion molecule 1	Ncam1	20.8037	0.375802			#N/A	P01796;P01797;P01799;P01800;P01801;P01802;P01803;P01804	-	Ig heavy chain V-III region A4	-	16.988	0.53283			#N/A	O08848	Trove2	60 kDa SS-A/Ro ribonucleoprotein	Trove2	17.9307	0.287011				P27573	Mpz	Myelin protein P0	Mpz	21.3288	0.582412
P13634	Ca1	Carbonic anhydrase 1	Ca1	25.4136	0.372859			#N/A	P01831	Thy1	Thy-1 membrane glycoprotein	Thy1	20.9704	0.476034			#N/A	O08856	Ell	RNA polymerase II elongation factor ELL	Ell	17.6267	0.658717				P27601	Gna13	Guanine nucleotide-binding protein subunit alpha-13	Gna13	20.4253	0.356192
P13707	Gpd1	Glycerol-3-phosphate dehydrogenase [NAD(+)], cytoplasmic	Gpd1	23.1511	0.676892			#N/A	P01837	Igkc	Immunoglobulin kappa constant	Igkc	21.4477	0.307954			#N/A	O08912	Galnt1	Polypeptide N-acetylgalactosaminyltransferase 1	Galnt1	19.3921	0.417058				P27612	Plaa	Phospholipase A-2-activating protein	Plaa	20.6876	0.484758
P13745	Gsta1	Glutathione S-transferase A1	Gsta1	21.1244	0.375334			#N/A	P01867	Igh-3	Ig gamma-2B chain C region	Igh-3	19.7311	1.23252			#N/A	O08915	Aip	AH receptor-interacting protein	Aip	19.3298	0.248167				P27641	Xrcc5	X-ray repair cross-complementing protein 5	Xrcc5	20.1448	0.37081
P14069	S100a6	Protein S100-A6	S100a6	26.7586	0.736681			#N/A	P01869	Ighg1	Ig gamma-1 chain C region, membrane-bound form	Ighg1	17.5356	0.86956			#N/A	O08917	Flot1	Flotillin-1	Flot1	20.9227	0.531763				P27659	Rpl3	60S ribosomal protein L3	Rpl3	23.8449	0.429193
P14094	Atp1b1	Sodium/potassium-transporting ATPase subunit beta-1	Atp1b1	23.757	0.455867			#N/A	P01887	B2m	Beta-2-microglobulin	B2m	23.1016	0.575444			#N/A	O08919	Numbl	Numb-like protein	Numbl	17.9944	0.536389				P27773	Pdia3	Protein disulfide-isomerase A3	Pdia3	25.2783	0.259674
P14115	Rpl27a	60S ribosomal protein L27a	Rpl27a	23.0764	0.774949			#N/A	P01897	H2-L	H-2 class I histocompatibility antigen, L-D alpha chain	H2-L	21.1271	0.53834			#N/A	O08992	Sdcbp	Syntenin-1	Sdcbp	16.677	0.661957				P28293	Ctsg	Cathepsin G	Ctsg	19.8277	1.85026
P14131	Rps16	40S ribosomal protein S16	Rps16	23.8368	0.469946			#N/A	P01921	H2-Ab1	H-2 class II histocompatibility antigen, A-D beta chain	H2-Ab1	20.846	1.06084			#N/A	O08997	Atox1	Copper transport protein ATOX1	Atox1	22.0599	0.422428				P28474	Adh5	Alcohol dehydrogenase class-3	Adh5	21.4897	0.455748
P14142	Slc2a4	Solute carrier family 2, facilitated glucose transporter member 4	Slc2a4	20.1465	0.516661			#N/A	P01942	Hba	Hemoglobin subunit alpha	Hba	25.3119	0.34901			#N/A	O09005	Degs1	Sphingolipid delta(4)-desaturase DES1	Degs1	18.6157	0.76274				P28481	Col2a1	Collagen alpha-1(II) chain	Col2a1	17.8729	1.18322
P14148	Rpl7	60S ribosomal protein L7	Rpl7	24.3414	0.162641			#N/A	P02463	Col4a1	Collagen alpha-1(IV) chain	Col4a1	23.3876	0.533867			#N/A	O09012	Pex5	Peroxisomal targeting signal 1 receptor	Pex5	18.4286	0.471253				P28574	Max	Protein max	Max	20.2697	0.902058
P14152	Mdh1	Malate dehydrogenase, cytoplasmic	Mdh1	24.7565	0.147022			#N/A	P02468	Lamc1	Laminin subunit gamma-1	Lamc1	23.6674	0.463087			#N/A	O09043	Napsa	Napsin-A	Napsa	19.1253	0.471065				P28650	Adssl1	Adenylosuccinate synthetase isozyme 1	Adssl1	19.3354	1.04069
P14206	Rpsa	40S ribosomal protein SA	Rpsa	23.821	0.320901			#N/A	P02469	Lamb1	Laminin subunit beta-1	Lamb1	22.5332	0.318125			#N/A	O09044	Snap23	Synaptosomal-associated protein 23	Snap23	21.5564	0.319536				P28653	Bgn	Biglycan	Bgn	22.8528	0.837096
P14211	Calr	Calreticulin	Calr	23.2782	0.28195			#N/A	P02535	Krt10	Keratin, type I cytoskeletal 10	Krt10	25.3335	0.631784			#N/A	O09061	Psmb1	Proteasome subunit beta type-1	Psmb1	23.4314	0.439499				P28656	Nap1l1	Nucleosome assembly protein 1-like 1	Nap1l1	17.1434	1.15681
P14576	Srp54	Signal recognition particle 54 kDa protein	Srp54	19.1792	0.58556			#N/A	P03888	Mtnd1	NADH-ubiquinone oxidoreductase chain 1	Mtnd1	17.1194	1.50284			#N/A	O09106	Hdac1	Histone deacetylase 1	Hdac1	19.3037	0.35461				P28659	Celf1	CUGBP Elav-like family member 1	Celf1	20.0123	0.762075
P14602	Hspb1	Heat shock protein beta-1	Hspb1	25.3484	0.240014			#N/A	P03911	Mtnd4	NADH-ubiquinone oxidoreductase chain 4	Mtnd4	19.505	0.928155			#N/A	O09110	Map2k3	Dual specificity mitogen-activated protein kinase kinase 3	Map2k3	20.297	0.265239				P28660	Nckap1	Nck-associated protein 1	Nckap1	21.0958	0.234531
P14685	Psmd3	26S proteasome non-ATPase regulatory subunit 3	Psmd3	21.205	0.218283			#N/A	P03953	Cfd	Complement factor D	Cfd	17.4387	1.62652			#N/A	O09111	Ndufb11	NADH dehydrogenase [ubiquinone] 1 beta subcomplex subunit 11, mitochondrial	Ndufb11	20.0445	0.822595				P28665	Mug1	Murinoglobulin-1	Mug1	19.9715	0.739698
P14824	Anxa6	Annexin A6	Anxa6	24.0935	0.331308			#N/A	P03958	Ada	Adenosine deaminase	Ada	20.8874	0.532395			#N/A	O09116	Sprr3	Small proline-rich protein 3	Sprr3	18.1079	0.798061				P28740	Kif2a	Kinesin-like protein KIF2A	Kif2a	20.1876	0.469753
P14869	Rplp0	60S acidic ribosomal protein P0	Rplp0	22.3685	0.241062			#N/A	P03975	Iap	IgE-binding protein	Iap	20.0904	0.598022			#N/A	O09117	Sypl1	Synaptophysin-like protein 1	Sypl1	19.4155	0.46243				P28776	Ido1	Indoleamine 2,3-dioxygenase 1	Ido1	19.0672	1.76197
P14873	Map1b	Microtubule-associated protein 1B	Map1b	20.1937	0.235848			#N/A	P03987	-	Ig gamma-3 chain C region	-	18.6358	0.121164			#N/A	O09131	Gsto1	Glutathione S-transferase omega-1	Gsto1	23.3267	0.676289				P28825	Mep1a	Meprin A subunit alpha	Mep1a	19.4491	1.29059
P15089	Cpa3	Mast cell carboxypeptidase A	Cpa3	21.4486	0.55891			#N/A	P03995	Gfap	Glial fibrillary acidic protein	Gfap	20.9292	0.282662			#N/A	O09159	Man2b1	Lysosomal alpha-mannosidase	Man2b1	19.4732	0.306401				P28843	Dpp4	Dipeptidyl peptidase 4	Dpp4	19.5266	0.49671
P15208	Insr	Insulin receptor	Insr	18.8454	0.283845			#N/A	P04104	Krt1	Keratin, type II cytoskeletal 1	Krt1	26.1977	0.447706			#N/A	O09161	Casq2	Calsequestrin-2	Casq2	19.6003	0.726647				P28867	Prkcd	Protein kinase C delta type	Prkcd	21.4066	0.50737
P15261	Ifngr1	Interferon gamma receptor 1	Ifngr1	18.4993	0.24112			#N/A	P04117	Fabp4	Fatty acid-binding protein, adipocyte	Fabp4	24.6467	0.586361			#N/A	O09164	Sod3	Extracellular superoxide dismutase [Cu-Zn]	Sod3	19.5199	0.554392				P29341	Pabpc1	Polyadenylate-binding protein 1	Pabpc1	23.0988	0.54478
P15306	Thbd	Thrombomodulin	Thbd	18.3264	0.286802			#N/A	P04247	Mb	Myoglobin	Mb	23.3531	0.612842			#N/A	O09165	Casq1	Calsequestrin-1	Casq1	20.1398	2.22317				P29351	Ptpn6	Tyrosine-protein phosphatase non-receptor type 6	Ptpn6	20.9357	0.585777
P15327	Bpgm	Bisphosphoglycerate mutase	Bpgm	18.2131	0.792649			#N/A	P04342;P04345;Q03740;Q9CXV3	Cryga;Crygd;Cryge;Crygf	Gamma-crystallin D	Cryga	22.8765	1.16288			#N/A	O09172	Gclm	Glutamate--cysteine ligase regulatory subunit	Gclm	20.7187	0.46898				P29391	Ftl1	Ferritin light chain 1	Ftl1	23.7542	0.376614
P15331	Prph	Peripherin	Prph	22.9822	0.333232			#N/A	P04627	Araf	Serine/threonine-protein kinase A-Raf	Araf	19.1423	1.33334			#N/A	O09174	Amacr	Alpha-methylacyl-CoA racemase	Amacr	18.3823	0.690098				P29416	Hexa	Beta-hexosaminidase subunit alpha	Hexa	21.2121	1.34772
P15379	Cd44	CD44 antigen	Cd44	18.7163	0.907776			#N/A	P04919	Slc4a1	Band 3 anion transport protein	Slc4a1	17.9893	0.802977			#N/A	O35071	Kif1c	Kinesin-like protein KIF1C	Kif1c	19.2055	0.369557				P29452	Casp1	Caspase-1	Casp1	21.0774	0.956097
P15508	Sptb	Spectrin beta chain, erythrocytic	Sptb	18.5232	0.94943			#N/A	P04925	Prnp	Major prion protein	Prnp	19.7978	0.221827			#N/A	O35074	Ptgis	Prostacyclin synthase	Ptgis	21.317	0.294657				P29595	Nedd8	NEDD8	Nedd8	22.0434	1.35814
P15532	Nme1	Nucleoside diphosphate kinase A	Nme1	22.3871	0.703195			#N/A	P05063	Aldoc	Fructose-bisphosphate aldolase C	Aldoc	19.3371	0.762561			#N/A	O35075	Dscr3	Down syndrome critical region protein 3 homolog	Dscr3	19.6781	0.39228				P29699	Ahsg	Alpha-2-HS-glycoprotein	Ahsg	20.305	1.70049
P15535	B4galt1	Beta-1,4-galactosyltransferase 1	B4galt1	17.4095	0.247709			#N/A	P05064	Aldoa	Fructose-bisphosphate aldolase A	Aldoa	26.5761	0.800036			#N/A	O35083	Agpat1	1-acyl-sn-glycerol-3-phosphate acyltransferase alpha	Agpat1	19.5314	0.623372				P29758	Oat	Ornithine aminotransferase, mitochondrial	Oat	22.0272	0.518136
P15626	Gstm2	Glutathione S-transferase Mu 2	Gstm2	22.4629	0.451883			#N/A	P05132	Prkaca	cAMP-dependent protein kinase catalytic subunit alpha	Prkaca	19.2229	0.668365			#N/A	O35114	Scarb2	Lysosome membrane protein 2	Scarb2	20.5692	0.345613				P29788	Vtn	Vitronectin	Vtn	19.8589	1.41301
P15702	Spn	Leukosialin	Spn	16.3135	0.570055			#N/A	P05201	Got1	Aspartate aminotransferase, cytoplasmic	Got1	23.0914	0.642922			#N/A	O35127	Grcc10	Protein C10	Grcc10	16.6431	1.36788				P30115	Gsta3	Glutathione S-transferase A3	Gsta3	21.3698	1.10225
P15864	Hist1h1c	Histone H1.2	Hist1h1c	24.4734	0.58714			#N/A	P05202	Got2	Aspartate aminotransferase, mitochondrial	Got2	24.4831	0.336145			#N/A	O35129	Phb2	Prohibitin-2	Phb2	23.0089	0.330805				P30204	Msr1	Macrophage scavenger receptor types I and II	Msr1	19.1265	1.28322
P15920	Atp6v0a2	V-type proton ATPase 116 kDa subunit a isoform 2	Atp6v0a2	18.2729	0.823557			#N/A	P05366	Saa1	Serum amyloid A-1 protein	Saa1	20.2044	0.811596			#N/A	O35134	Polr1a	DNA-directed RNA polymerase I subunit RPA1	Polr1a	18.1292	0.419217				P30275	Ckmt1	Creatine kinase U-type, mitochondrial	Ckmt1	25.3835	1.05906
P15947	Klk1	Kallikrein-1	Klk1	24.3128	0.526214			#N/A	P05555	Itgam	Integrin alpha-M	Itgam	18.0546	0.774732			#N/A	O35136	Ncam2	Neural cell adhesion molecule 2	Ncam2	19.0539	0.192399				P30285	Cdk4	Cyclin-dependent kinase 4	Cdk4	19.3114	0.910832
P16014	Chgb	Secretogranin-1	Chgb	19.7837	0.620313			#N/A	P05784	Krt18	Keratin, type I cytoskeletal 18	Krt18	25.3384	0.415492			#N/A	O35143	ATP5IF1	ATPase inhibitor, mitochondrial	ATP5IF1	19.5618	1.82698				P30355	Alox5ap	Arachidonate 5-lipoxygenase-activating protein	Alox5ap	21.6754	0.728921
P16015	Ca3	Carbonic anhydrase 3	Ca3	28.0829	1.15175			#N/A	P05977	Myl1	Myosin light chain 1/3, skeletal muscle isoform	Myl1	27.7674	1.36848			#N/A	O35144	Terf2	Telomeric repeat-binding factor 2	Terf2	16.4203	1.05972				P30416	Fkbp4	Peptidyl-prolyl cis-trans isomerase FKBP4	Fkbp4	21.6988	0.467681
P16045	Lgals1	Galectin-1	Lgals1	23.9209	0.297834			#N/A	P06151	Ldha	L-lactate dehydrogenase A chain	Ldha	26.6458	0.576654			#N/A	O35166	Gosr2	Golgi SNAP receptor complex member 2	Gosr2	18.1545	0.362399				P30677	Gna14	Guanine nucleotide-binding protein subunit alpha-14	Gna14	19.6223	0.760763
P16110	Lgals3	Galectin-3	Lgals3	24.9708	0.996486			#N/A	P06344	-	H-2 class II histocompatibility antigen, A-U beta chain	-	20.6712	0.701632			#N/A	O35206	Col15a1	Collagen alpha-1(XV) chain	Col15a1	21.883	0.428394				P30681	Hmgb2	High mobility group protein B2	Hmgb2	21.802	0.573318
P16125	Ldhb	L-lactate dehydrogenase B chain	Ldhb	22.2598	0.166046			#N/A	P06537	Nr3c1	Glucocorticoid receptor	Nr3c1	17.9198	0.826074			#N/A	O35215	Ddt	D-dopachrome decarboxylase	Ddt	22.3335	0.500932				P30993	C5ar1	C5a anaphylatoxin chemotactic receptor 1	C5ar1	19.5477	0.981625
P16254	Srp14	Signal recognition particle 14 kDa protein	Srp14	19.0072	0.520393			#N/A	P06683	C9	Complement component C9	C9	17.4493	2.38681			#N/A	O35216	Cenpa	Histone H3-like centromeric protein A	Cenpa	18.0192	0.521019				P30999	Ctnnd1	Catenin delta-1	Ctnnd1	22.6994	0.777763
P16330	Cnp	2',3'-cyclic-nucleotide 3'-phosphodiesterase	Cnp	19.3661	0.235814			#N/A	P06728	Apoa4	Apolipoprotein A-IV	Apoa4	20.9763	0.640229			#N/A	O35218	Cpsf2	Cleavage and polyadenylation specificity factor subunit 2	Cpsf2	18.7319	0.388894				P31001	Des	Desmin	Des	27.4689	0.415161
P16332	Mut	Methylmalonyl-CoA mutase, mitochondrial	Mut	19.9986	0.263278			#N/A	P06745	Gpi	Glucose-6-phosphate isomerase	Gpi	24.1684	0.465511			#N/A	O35226	Psmd4	26S proteasome non-ATPase regulatory subunit 4	Psmd4	21.0967	0.298687				P31230	Aimp1	Aminoacyl tRNA synthase complex-interacting multifunctional protein 1	Aimp1	20.3844	1.03257
P16406	Enpep	Glutamyl aminopeptidase	Enpep	19.2527	1.20759			#N/A	P06800	Ptprc	Receptor-type tyrosine-protein phosphatase C	Ptprc	19.7023	0.906574			#N/A	O35239	Ptpn9	Tyrosine-protein phosphatase non-receptor type 9	Ptpn9	18.3066	0.616399				P31428	Dpep1	Dipeptidase 1	Dpep1	21.0637	1.15222
P16460	Ass1	Argininosuccinate synthase	Ass1	22.9605	0.0872694			#N/A	P06802	Enpp1	Ectonucleotide pyrophosphatase/phosphodiesterase family member 1	Enpp1	18.3726	0.717921			#N/A	O35245	Pkd2	Polycystin-2	Pkd2	18.9032	0.858083				P31725	S100a9	Protein S100-A9	S100a9	25.0707	1.48983
P16546	Sptan1	Spectrin alpha chain, non-erythrocytic 1	Sptan1	23.753	0.0490852			#N/A	P06837	Gap43	Neuromodulin	Gap43	18.3353	0.621309			#N/A	O35250	Exoc7	Exocyst complex component 7	Exoc7	18.7566	0.646389				P31750	Akt1	RAC-alpha serine/threonine-protein kinase	Akt1	18.3405	0.697449
P16675	Ctsa	Lysosomal protective protein	Ctsa	19.88	0.80291			#N/A	P06909	Cfh	Complement factor H	Cfh	19.0312	0.653768			#N/A	O35286	Dhx15	Pre-mRNA-splicing factor ATP-dependent RNA helicase DHX15	Dhx15	21.025	0.124315				P31809	Ceacam1	Carcinoembryonic antigen-related cell adhesion molecule 1	Ceacam1	21.4568	0.965827
P16858	Gapdh	Glyceraldehyde-3-phosphate dehydrogenase	Gapdh	26.9417	0.741617			#N/A	P07091	S100a4	Protein S100-A4	S100a4	21.6945	0.740332			#N/A	O35295	Purb	Transcriptional activator protein Pur-beta	Purb	21.9406	0.293778				P31938	Map2k1	Dual specificity mitogen-activated protein kinase kinase 1	Map2k1	22.2414	0.336783
P17012;P23607	Zfa;Zfx	Zinc finger X-chromosomal protein	Zfa	18.2376	0.0294781			#N/A	P07214	Sparc	SPARC	Sparc	20.1185	0.538719			#N/A	O35343	Kpna4	Importin subunit alpha-3	Kpna4	19.0182	0.501692				P31996	Cd68	Macrosialin	Cd68	22.0111	0.984649
P17047	Lamp2	Lysosome-associated membrane glycoprotein 2	Lamp2	22.3159	0.358207			#N/A	P07309	Ttr	Transthyretin	Ttr	22.3178	0.610033			#N/A	O35345	Kpna6	Importin subunit alpha-7	Kpna6	18.0636	0.811702				P32020	Scp2	Non-specific lipid-transfer protein	Scp2	20.8069	0.751825
P17095	Hmga1	High mobility group protein HMG-I/HMG-Y	Hmga1	20.6857	1.0166			#N/A	P07310	Ckm	Creatine kinase M-type	Ckm	27.5224	1.81258			#N/A	O35350	Capn1	Calpain-1 catalytic subunit	Capn1	21.7933	0.0992787				P32067	Ssb	Lupus La protein homolog	Ssb	22.0859	0.36441
P17156	Hspa2	Heat shock-related 70 kDa protein 2	Hspa2	20.8417	0.152194			#N/A	P07356	Anxa2	Annexin A2	Anxa2	25.2649	0.700424			#N/A	O35379	Abcc1	Multidrug resistance-associated protein 1	Abcc1	19.5817	0.564797				P32233	Drg1	Developmentally-regulated GTP-binding protein 1	Drg1	19.3986	0.432656
P17182	Eno1	Alpha-enolase	Eno1	24.2633	0.458018			#N/A	P07724	Alb	Serum albumin	Alb	26.0084	0.637066			#N/A	O35381	Anp32a	Acidic leucine-rich nuclear phosphoprotein 32 family member A	Anp32a	23.6458	0.294514				P32261	Serpinc1	Antithrombin-III	Serpinc1	20.6432	0.759672
P17183	Eno2	Gamma-enolase	Eno2	19.8766	0.334168			#N/A	P07742	Rrm1	Ribonucleoside-diphosphate reductase large subunit	Rrm1	18.8102	0.85163			#N/A	O35382	Exoc4	Exocyst complex component 4	Exoc4	19.7136	0.327744				P32507	Nectin2	Nectin-2	Nectin2	19.6754	0.355947
P17225	Ptbp1	Polypyrimidine tract-binding protein 1	Ptbp1	22.4365	0.337224			#N/A	P07744	Krt4	Keratin, type II cytoskeletal 4	Krt4	20.4337	0.762343			#N/A	O35386	Phyh	Phytanoyl-CoA dioxygenase, peroxisomal	Phyh	18.7339	0.474355				P32648	Vip	VIP peptides	Vip	20.2776	1.71584
P17426	Ap2a1	AP-2 complex subunit alpha-1	Ap2a1	20.7897	0.619171			#N/A	P07758	Serpina1a	Alpha-1-antitrypsin 1-1	Serpina1a	20.8787	0.310484			#N/A	O35387	Hax1	HCLS1-associated protein X-1	Hax1	17.3607	0.337102				P32848	Pvalb	Parvalbumin alpha	Pvalb	20.4471	1.87641
P17427	Ap2a2	AP-2 complex subunit alpha-2	Ap2a2	21.834	0.413878			#N/A	P07759	Serpina3k	Serine protease inhibitor A3K	Serpina3k	20.4734	0.234214			#N/A	O35400	Sult2b1	Sulfotransferase family cytosolic 2B member 1	Sult2b1	18.4581	0.485934				P32883	Kras	GTPase KRas	Kras	19.9598	1.22502
P17439	Gba	Glucosylceramidase	Gba	20.0873	0.20374			#N/A	P07901	Hsp90aa1	Heat shock protein HSP 90-alpha	Hsp90aa1	23.6845	0.231931			#N/A	O35405	Pld3	Phospholipase D3	Pld3	20.6504	0.336861				P34022	Ranbp1	Ran-specific GTPase-activating protein	Ranbp1	22.7054	0.794987
P17563	Selenbp1	Methanethiol oxidase	Selenbp1	25.2734	0.343071			#N/A	P08030	Aprt	Adenine phosphoribosyltransferase	Aprt	20.798	1.00611			#N/A	O35425	Bok	Bcl-2-related ovarian killer protein	Bok	18.5342	0.461905				P34152	Ptk2	Focal adhesion kinase 1	Ptk2	19.2441	0.567785
P17665	Cox7c	Cytochrome c oxidase subunit 7C, mitochondrial	Cox7c	21.0777	0.507657			#N/A	P08071	Ltf	Lactotransferrin	Ltf	20.2332	0.667626			#N/A	O35435	Dhodh	Dihydroorotate dehydrogenase (quinone), mitochondrial	Dhodh	19.5286	0.272918				P34914	Ephx2	Bifunctional epoxide hydrolase 2	Ephx2	19.1638	0.525364
P17710	Hk1	Hexokinase-1	Hk1	23.9047	0.139974			#N/A	P08074	Cbr2	Carbonyl reductase [NADPH] 2	Cbr2	21.0089	0.398671			#N/A	O35452	Tnxb	Tenascin X	Tnxb	21.5899	0.382557				P35123	Usp4	Ubiquitin carboxyl-terminal hydrolase 4	Usp4	19.0042	0.748091
P17742	Ppia	Peptidyl-prolyl cis-trans isomerase A	Ppia	25.0447	1.2828			#N/A	P08113	Hsp90b1	Endoplasmin	Hsp90b1	24.3107	0.222589			#N/A	O35459	Ech1	Delta(3,5)-Delta(2,4)-dienoyl-CoA isomerase, mitochondrial	Ech1	20.8233	0.137463				P35173	Stfa3	Stefin-3	Stfa3	20.4449	0.616881
P17751	Tpi1	Triosephosphate isomerase	Tpi1	24.7768	0.594504			#N/A	P08121	Col3a1	Collagen alpha-1(III) chain	Col3a1	24.1833	1.1954			#N/A	O35465	Fkbp8	Peptidyl-prolyl cis-trans isomerase FKBP8	Fkbp8	19.248	0.551772				P35230	Reg3b	Regenerating islet-derived protein 3-beta	Reg3b	20.6691	1.72567
P17809	Slc2a1	Solute carrier family 2, facilitated glucose transporter member 1	Slc2a1	20.1392	1.49178			#N/A	P08207	S100a10	Protein S100-A10	S100a10	19.8133	0.573796			#N/A	O35492	Clk3	Dual specificity protein kinase CLK3	Clk3	16.8023	0.287465				P35235	Ptpn11	Tyrosine-protein phosphatase non-receptor type 11	Ptpn11	20.7194	0.607969
P17897	Lyz1	Lysozyme C-1	Lyz1	20.9247	0.955272			#N/A	P08226	Apoe	Apolipoprotein E	Apoe	20.4902	0.466103			#N/A	O35551	Rabep1	Rab GTPase-binding effector protein 1	Rabep1	19.1355	0.406129				P35276	Rab3d	Ras-related protein Rab-3D	Rab3d	20.7667	0.7412
P17918	Pcna	Proliferating cell nuclear antigen	Pcna	20.253	0.676673			#N/A	P08228	Sod1	Superoxide dismutase [Cu-Zn]	Sod1	23.6706	0.845076			#N/A	O35593	Psmd14	26S proteasome non-ATPase regulatory subunit 14	Psmd14	22.1758	0.39415				P35278	Rab5c	Ras-related protein Rab-5C	Rab5c	22.213	0.697045
P18052	Ptpra	Receptor-type tyrosine-protein phosphatase alpha	Ptpra	18.5637	0.921991			#N/A	P08249	Mdh2	Malate dehydrogenase, mitochondrial	Mdh2	25.5567	0.436163			#N/A	O35598	Adam10	Disintegrin and metalloproteinase domain-containing protein 10	Adam10	20.7991	0.102494				P35279	Rab6a	Ras-related protein Rab-6A	Rab6a	22.2028	1.56199
P18242	Ctsd	Cathepsin D	Ctsd	21.6827	0.445451			#N/A	P08551	Nefl	Neurofilament light polypeptide	Nefl	19.8032	0.368832			#N/A	O35601	Fyb1	FYN-binding protein 1	Fyb1	18.2384	0.32955				P35282	Rab21	Ras-related protein Rab-21	Rab21	18.5327	0.910367
P18419	Svs4	Seminal vesicle secretory protein 4	Svs4	26.1404	3.0882			#N/A	P08553	Nefm	Neurofilament medium polypeptide	Nefm	19.1201	0.747203			#N/A	O35604	Npc1	NPC intracellular cholesterol transporter 1	Npc1	18.2106	0.949962				P35290	Rab24	Ras-related protein Rab-24	Rab24	17.8679	0.153019
P18572	Bsg	Basigin	Bsg	24.2573	0.221205			#N/A	P08556	Nras	GTPase NRas	Nras	18.1307	0.427208			#N/A	O35609	Scamp3	Secretory carrier-associated membrane protein 3	Scamp3	19.6216	0.576903				P35293	Rab18	Ras-related protein Rab-18	Rab18	21.5985	0.411909
P18653	Rps6ka1	Ribosomal protein S6 kinase alpha-1	Rps6ka1	21.9342	0.175948			#N/A	P08730	Krt13	Keratin, type I cytoskeletal 13	Krt13	19.9246	1.05002			#N/A	O35623	Bet1	BET1 homolog	Bet1	15.4974	0.885104				P35385	Hspb7	Heat shock protein beta-7	Hspb7	19.1466	1.26039
P18760	Cfl1	Cofilin-1	Cfl1	24.7034	0.407369			#N/A	P08752	Gnai2	Guanine nucleotide-binding protein G(i) subunit alpha-2	Gnai2	19.3299	1.19466			#N/A	O35638	Stag2	Cohesin subunit SA-2	Stag2	18.9404	0.448587				P35396	Ppard	Peroxisome proliferator-activated receptor delta	Ppard	20.772	1.70639
P18826	Phka1	Phosphorylase b kinase regulatory subunit alpha, skeletal muscle isoform	Phka1	17.5431	0.802307			#N/A	P08775	Polr2a	DNA-directed RNA polymerase II subunit RPB1	Polr2a	19.4675	0.664095			#N/A	O35639	Anxa3	Annexin A3	Anxa3	23.7529	0.184483				P35486	Pdha1	Pyruvate dehydrogenase E1 component subunit alpha, somatic form, mitochondrial	Pdha1	23.4337	0.266766
P18872	Gnao1	Guanine nucleotide-binding protein G(o) subunit alpha	Gnao1	20.9094	0.41595			#N/A	P09036	Spink1	Serine protease inhibitor Kazal-type 1	Spink1	21.8447	0.400358			#N/A	O35640	Anxa8	Annexin A8	Anxa8	21.29	0.380025				P35492	Hal	Histidine ammonia-lyase	Hal	18.6381	0.64761
P19001	Krt19	Keratin, type I cytoskeletal 19	Krt19	28.3036	0.178998			#N/A	P09055	Itgb1	Integrin beta-1	Itgb1	23.0598	0.395363			#N/A	O35643	Ap1b1	AP-1 complex subunit beta-1	Ap1b1	21.5565	0.06839				P35505	Fah	Fumarylacetoacetase	Fah	18.8076	0.738084
P19096	Fasn	Fatty acid synthase	Fasn	22.3863	0.155173			#N/A	P09103	P4hb	Protein disulfide-isomerase	P4hb	24.4911	0.23989			#N/A	O35654	Pold2	DNA polymerase delta subunit 2	Pold2	17.8177	0.854591				P35550	Fbl	rRNA 2'-O-methyltransferase fibrillarin	Fbl	22.3009	0.620927
P19137	Lama1	Laminin subunit alpha-1	Lama1	20.7761	0.413136			#N/A	P09405	Ncl	Nucleolin	Ncl	23.6082	0.778432			#N/A	O35680	Mrps12	28S ribosomal protein S12, mitochondrial	Mrps12	17.826	0.540704				P35564	Canx	Calnexin	Canx	22.5562	0.408702
P19157	Gstp1	Glutathione S-transferase P 1	Gstp1	24.3453	0.368018			#N/A	P09411	Pgk1	Phosphoglycerate kinase 1	Pgk1	24.9076	0.541519			#N/A	O35682	Myadm	Myeloid-associated differentiation marker	Myadm	19.5122	0.566878				P35585	Ap1m1	AP-1 complex subunit mu-1	Ap1m1	19.8766	1.44486
P19221	F2	Prothrombin	F2	18.122	0.241054			#N/A	P09470	Ace	Angiotensin-converting enzyme	Ace	19.1307	0.801751			#N/A	O35685	Nudc	Nuclear migration protein nudC	Nudc	21.1534	0.339877				P35700	Prdx1	Peroxiredoxin-1	Prdx1	25.9032	0.401225
P19246	Nefh	Neurofilament heavy polypeptide	Nefh	19.4326	0.332904			#N/A	P09528	Fth1	Ferritin heavy chain	Fth1	22.4915	0.830165			#N/A	O35730	Ring1	E3 ubiquitin-protein ligase RING1	Ring1	17.8516	0.31602				P35762	Cd81	CD81 antigen	Cd81	17.9696	0.080679
P19253	Rpl13a	60S ribosomal protein L13a	Rpl13a	20.2631	1.46021			#N/A	P09541	Myl4	Myosin light chain 4	Myl4	18.7623	1.29011			#N/A	O35737	Hnrnph1	Heterogeneous nuclear ribonucleoprotein H	Hnrnph1	23.0227	0.232285				P35821	Ptpn1	Tyrosine-protein phosphatase non-receptor type 1	Ptpn1	19.2656	1.09882
P19324	Serpinh1	Serpin H1	Serpinh1	21.4326	0.241209			#N/A	P09542	Myl3	Myosin light chain 3	Myl3	25.7921	1.08873			#N/A	O35841	Api5	Apoptosis inhibitor 5	Api5	20.6636	0.108482				P35822	Ptprk	Receptor-type tyrosine-protein phosphatase kappa	Ptprk	18.1444	0.860407
P19426	Nelfe	Negative elongation factor E	Nelfe	18.4001	0.287351			#N/A	P09602	Hmgn2	Non-histone chromosomal protein HMG-17	Hmgn2	20.1931	1.01867			#N/A	O35855	Bcat2	Branched-chain-amino-acid aminotransferase, mitochondrial	Bcat2	20.8472	0.337065				P35922	Fmr1	Synaptic functional regulator FMR1	Fmr1	18.8585	1.16917
P19467	Muc13	Mucin-13	Muc13	23.1567	0.519202			#N/A	P09803	Cdh1	Cadherin-1	Cdh1	22.1965	0.277813			#N/A	O35857	Timm44	Mitochondrial import inner membrane translocase subunit TIM44	Timm44	20.1744	0.185233				P35980	Rpl18	60S ribosomal protein L18	Rpl18	24.521	0.209851
P19536	Cox5b	Cytochrome c oxidase subunit 5B, mitochondrial	Cox5b	21.3014	0.454195			#N/A	P09925	Surf1	Surfeit locus protein 1	Surf1	20.0497	0.299519			#N/A	O35864	Cops5	COP9 signalosome complex subunit 5	Cops5	20.5002	0.319681				P36536	Sar1a	GTP-binding protein SAR1a	Sar1a	19.2369	0.408238
P19639	Gstm3	Glutathione S-transferase Mu 3	Gstm3	22.0033	0.444492			#N/A	P0C5K1	Sbk2	Serine/threonine-protein kinase SBK2	Sbk2	21.2618	1.26655			#N/A	O35887	Calu	Calumenin	Calu	22.3952	0.391689				P36552	Cpox	Oxygen-dependent coproporphyrinogen-III oxidase, mitochondrial	Cpox	20.5651	0.507028
P19783	Cox4i1	Cytochrome c oxidase subunit 4 isoform 1, mitochondrial	Cox4i1	24.1493	0.105237			#N/A	P0C605	Prkg1	cGMP-dependent protein kinase 1	Prkg1	19.6517	0.300242			#N/A	O35900	Lsm2	U6 snRNA-associated Sm-like protein LSm2	Lsm2	19.7132	0.391273				P36916	Gnl1	Guanine nucleotide-binding protein-like 1	Gnl1	19.0521	0.395667
P19973	Lsp1	Lymphocyte-specific protein 1	Lsp1	19.2228	0.53404			#N/A	P0CG14	Chtf8	Chromosome transmission fidelity protein 8 homolog isoform 2	Chtf8	18.2763	1.23389			#N/A	O35902	Dsg3	Desmoglein-3	Dsg3	18.7833	1.89935				P36993	Ppm1b	Protein phosphatase 1B	Ppm1b	19.655	0.586741
P20040	-	H-2 class II histocompatibility antigen, E-Q beta chain	-	19.3456	1.21228			#N/A	P0DN34	Ndufb1	NADH dehydrogenase [ubiquinone] 1 beta subcomplex subunit 1	Ndufb1	20.556	0.791317			#N/A	O35943	Fxn	Frataxin, mitochondrial	Fxn	17.3314	0.532915				P37040	Por	NADPH--cytochrome P450 reductase	Por	22.3515	0.27637
P20060	Hexb	Beta-hexosaminidase subunit beta	Hexb	22.2916	0.562291			#N/A	P0DP26;P0DP27;P0DP28	Calm1;Calm2;Calm3	Calmodulin-1	Calm1	26.2948	0.613292			#N/A	O35945	Aldh1a7	Aldehyde dehydrogenase, cytosolic 1	Aldh1a7	18.55	0.596332				P37804	Tagln	Transgelin	Tagln	27.2033	0.615975
P20065	Tmsb4x	Thymosin beta-4	Tmsb4x	20.8671	0.989883			#N/A	P10126	Eef1a1	Elongation factor 1-alpha 1	Eef1a1	27.969	0.495734			#N/A	O35963	Rab33b	Ras-related protein Rab-33B	Rab33b	17.5313	2.86807				P37889	Fbln2	Fibulin-2	Fbln2	19.7047	0.622072
P20108	Prdx3	Thioredoxin-dependent peroxide reductase, mitochondrial	Prdx3	24.488	0.22892			#N/A	P10493	Nid1	Nidogen-1	Nid1	24.299	0.25425			#N/A	O35969	Gamt	Guanidinoacetate N-methyltransferase	Gamt	19.4431	0.662034				P39053	Dnm1	Dynamin-1	Dnm1	19.2855	0.618563
P20152	Vim	Vimentin	Vim	26.5672	0.253519			#N/A	P10518	Alad	Delta-aminolevulinic acid dehydratase	Alad	20.0574	0.678027			#N/A	O35972	Mrpl23	39S ribosomal protein L23, mitochondrial	Mrpl23	18.6165	1.03472				P39054	Dnm2	Dynamin-2	Dnm2	22.5422	0.222987
P20352	F3	Tissue factor	F3	17.7794	0.733996			#N/A	P10605	Ctsb	Cathepsin B	Ctsb	20.7454	0.308492			#N/A	O35988	Sdc4	Syndecan-4	Sdc4	18.7033	1.02614				P39061	Col18a1	Collagen alpha-1(XVIII) chain	Col18a1	23.3112	0.640009
P20444	Prkca	Protein kinase C alpha type	Prkca	20.2679	0.207169			#N/A	P10630	Eif4a2	Eukaryotic initiation factor 4A-II	Eif4a2	20.9669	0.479432			#N/A	O54692	Zw10	Centromere/kinetochore protein zw10 homolog	Zw10	17.5155	0.459526				P39098	Man1a2	Mannosyl-oligosaccharide 1,2-alpha-mannosidase IB	Man1a2	19.4769	1.37217
P20801	Tnnc2	Troponin C, skeletal muscle	Tnnc2	25.1722	1.21707			#N/A	P10639	Txn	Thioredoxin	Txn	25.9069	0.834196			#N/A	O54724	Cavin1	Caveolae-associated protein 1	Cavin1	23.9509	0.353844				P39447	Tjp1	Tight junction protein ZO-1	Tjp1	21.1563	0.606909
P20918	Plg	Plasminogen	Plg	20.7427	0.331849			#N/A	P10649	Gstm1	Glutathione S-transferase Mu 1	Gstm1	25.7253	0.347475			#N/A	O54734	Ddost	Dolichyl-diphosphooligosaccharide--protein glycosyltransferase 48 kDa subunit	Ddost	23.4222	0.15995				P39749	Fen1	Flap endonuclease 1	Fen1	20.3065	0.455156
P21107	Tpm3	Tropomyosin alpha-3 chain	Tpm3	22.8627	0.54334			#N/A	P10711	Tcea1	Transcription elongation factor A protein 1	Tcea1	20.2718	0.760315			#N/A	O54774	Ap3d1	AP-3 complex subunit delta-1	Ap3d1	19.7233	0.377184				P40124	Cap1	Adenylyl cyclase-associated protein 1	Cap1	21.9779	0.392761
P21126	Ubl4a	Ubiquitin-like protein 4A	Ubl4a	19.7498	0.511944			#N/A	P10833	Rras	Ras-related protein R-Ras	Rras	22.6597	0.946745			#N/A	O54782	Man2b2	Epididymis-specific alpha-mannosidase	Man2b2	18.7846	0.437138				P40142	Tkt	Transketolase	Tkt	25.6548	0.5874
P21271	Myo5b	Unconventional myosin-Vb	Myo5b	20.0791	0.316704			#N/A	P10854	Hist1h2bm	Histone H2B type 1-M	Hist1h2bm	28.6849	0.342344			#N/A	O54784	Dapk3	Death-associated protein kinase 3	Dapk3	19.3621	0.407312				P40336	Vps26a	Vacuolar protein sorting-associated protein 26A	Vps26a	20.0525	0.696148
P21278	Gna11	Guanine nucleotide-binding protein subunit alpha-11	Gna11	22.096	0.340579			#N/A	P10922	H1f0	Histone H1.0	H1f0	25.3519	0.458113			#N/A	O54785	Limk2	LIM domain kinase 2	Limk2	19.3713	0.344158				P40630	Tfam	Transcription factor A, mitochondrial	Tfam	18.3449	0.849567
P21279	Gnaq	Guanine nucleotide-binding protein G(q) subunit alpha	Gnaq	19.7316	0.91547			#N/A	P11031	Sub1	Activated RNA polymerase II transcriptional coactivator p15	Sub1	22.3009	1.20431			#N/A	O54786	Dffa	DNA fragmentation factor subunit alpha	Dffa	17.9357	0.67816				P40936	Inmt	Indolethylamine N-methyltransferase	Inmt	20.256	0.79874
P21300	Akr1b7	Aldose reductase-related protein 1	Akr1b7	21.2113	1.83824			#N/A	P11087	Col1a1	Collagen alpha-1(I) chain	Col1a1	28.7358	0.917285			#N/A	O54825	Bysl	Bystin	Bysl	18.5628	0.33943				P41105	Rpl28	60S ribosomal protein L28	Rpl28	23.2579	0.878097
P21447	Abcb1a	Multidrug resistance protein 1A	Abcb1a	22.0084	0.455367			#N/A	P11088	Flg	Filaggrin (Fragment)	Flg	22.0592	1.96402			#N/A	O54833	Csnk2a2	Casein kinase II subunit alpha'	Csnk2a2	20.4944	0.274043				P41241	Csk	Tyrosine-protein kinase CSK	Csk	19.8853	0.501708
P21460	Cst3	Cystatin-C	Cst3	19.787	0.713485			#N/A	P11352	Gpx1	Glutathione peroxidase 1	Gpx1	22.2331	0.113085			#N/A	O54865	Gucy1b1	Guanylate cyclase soluble subunit beta-1	Gucy1b1	19.1718	0.333899				P42125	Eci1	Enoyl-CoA delta isomerase 1, mitochondrial	Eci1	20.463	0.36662
P21550	Eno3	Beta-enolase	Eno3	25.1863	0.973473			#N/A	P11440	Cdk1	Cyclin-dependent kinase 1	Cdk1	19.5485	1.2505			#N/A	O54879	Hmgb3	High mobility group protein B3	Hmgb3	20.0349	0.489922				P42128	Foxk1	Forkhead box protein K1	Foxk1	20.1933	0.58116
P21614	Gc	Vitamin D-binding protein	Gc	19.2973	0.646242			#N/A	P11499	Hsp90ab1	Heat shock protein HSP 90-beta	Hsp90ab1	25.2463	0.266217			#N/A	O54916	Reps1	RalBP1-associated Eps domain-containing protein 1	Reps1	18.7794	0.376914				P42208	2002-09-01	Septin-2	2002-09-01	20.5427	0.855397
P21619	Lmnb2	Lamin-B2	Lmnb2	22.503	0.139643			#N/A	P11531	Dmd	Dystrophin	Dmd	20.7214	0.367113			#N/A	O54931	Akap2	A-kinase anchor protein 2	Akap2	21.0243	0.616859				P42209	2001-09-01	Septin-1	2001-09-01	18.935	0.375814
P21812	Mcpt4	Mast cell protease 4	Mcpt4	19.3445	1.19181			#N/A	P11589	Mup2	Major urinary protein 2	Mup2	18.8403	0.790908			#N/A	O54941	Smarce1	SWI/SNF-related matrix-associated actin-dependent regulator of chromatin subfamily E member 1	Smarce1	20.268	0.381501				P42227	Stat3	Signal transducer and activator of transcription 3	Stat3	20.7235	0.50056
P21844	Cma1	Chymase	Cma1	18.9615	0.796988			#N/A	P11627	L1cam	Neural cell adhesion molecule L1	L1cam	20.07	1.08002			#N/A	O54946	Dnajb6	DnaJ homolog subfamily B member 6	Dnajb6	19.7847	0.686882				P42232	Stat5b	Signal transducer and activator of transcription 5B	Stat5b	19.3129	0.391909
P21956	Mfge8	Lactadherin	Mfge8	18.6247	0.932704			#N/A	P11679	Krt8	Keratin, type II cytoskeletal 8	Krt8	28.8605	0.434059			#N/A	O54950	Prkag1	5'-AMP-activated protein kinase subunit gamma-1	Prkag1	20.0261	0.151902				P42567	Eps15	Epidermal growth factor receptor substrate 15	Eps15	18.3838	0.6778
P22005	Penk	Proenkephalin-A	Penk	20.0979	1.88944			#N/A	P11725	Otc	Ornithine carbamoyltransferase, mitochondrial	Otc	20.3446	0.838152			#N/A	O54962	Banf1	Barrier-to-autointegration factor	Banf1	21.7159	0.475216				P42669	Pura	Transcriptional activator protein Pur-alpha	Pura	21.9484	0.186702
P22315	Fech	Ferrochelatase, mitochondrial	Fech	19.5197	1.17906			#N/A	P11835	Itgb2	Integrin beta-2	Itgb2	18.178	0.367087			#N/A	O54974	Lgals7	Galectin-7	Lgals7	24.7995	0.95237				P42859	Htt	Huntingtin	Htt	18.0365	0.565695
P22599	Serpina1b	Alpha-1-antitrypsin 1-2	Serpina1b	20.078	0.177282			#N/A	P11881	Itpr1	Inositol 1,4,5-trisphosphate receptor type 1	Itpr1	18.6522	0.412514			#N/A	O54984	Asna1	ATPase Asna1	Asna1	20.8687	0.505768				P42932	Cct8	T-complex protein 1 subunit theta	Cct8	23.2527	0.582024
P22682	Cbl	E3 ubiquitin-protein ligase CBL	Cbl	17.9519	0.404272			#N/A	P11928	Oas1a	2'-5'-oligoadenylate synthase 1A	Oas1a	20.4262	0.356132			#N/A	O54988	Slk	STE20-like serine/threonine-protein kinase	Slk	21.0248	0.178941				P43135	Nr2f2	COUP transcription factor 2	Nr2f2	18.3421	0.736652
P22892	Ap1g1	AP-1 complex subunit gamma-1	Ap1g1	20.7181	0.79637			#N/A	P11930	Nudt19	Nucleoside diphosphate-linked moiety X motif 19	Nudt19	20.2327	0.381014			#N/A	O54992	Mapkapk5	MAP kinase-activated protein kinase 5	Mapkapk5	19.6356	0.518332				P43247	Msh2	DNA mismatch repair protein Msh2	Msh2	18.7818	0.193399
P22907	Hmbs	Porphobilinogen deaminase	Hmbs	19.1621	0.495169			#N/A	P11983	Tcp1	T-complex protein 1 subunit alpha	Tcp1	23.3131	0.371526			#N/A	O54998	Fkbp7	Peptidyl-prolyl cis-trans isomerase FKBP7	Fkbp7	17.084	1.01349				P43275	Hist1h1a	Histone H1.1	Hist1h1a	26.3432	0.614643
P23116	Eif3a	Eukaryotic translation initiation factor 3 subunit A	Eif3a	20.9994	0.489082			#N/A	P12367	Prkar2a	cAMP-dependent protein kinase type II-alpha regulatory subunit	Prkar2a	21.1476	0.450248			#N/A	O55013	Trappc3	Trafficking protein particle complex subunit 3	Trappc3	21.6502	0.253997				P43276	Hist1h1b	Histone H1.5	Hist1h1b	25.4743	0.538385
P23249	Mov10	Putative helicase MOV-10	Mov10	19.0808	0.54946			#N/A	P12787	Cox5a	Cytochrome c oxidase subunit 5A, mitochondrial	Cox5a	24.7011	0.579371			#N/A	O55022	Pgrmc1	Membrane-associated progesterone receptor component 1	Pgrmc1	22.3231	0.169982				P45376	Akr1b1	Aldose reductase	Akr1b1	23.242	0.448358
P23475	Xrcc6	X-ray repair cross-complementing protein 6	Xrcc6	18.9208	0.445573			#N/A	P12815	Pdcd6	Programmed cell death protein 6	Pdcd6	20.4117	0.469388			#N/A	O55023	Impa1	Inositol monophosphatase 1	Impa1	21.779	0.347048				P45377	Akr1b8	Aldose reductase-related protein 2	Akr1b8	22.559	0.328686
P23492	Pnp	Purine nucleoside phosphorylase	Pnp	22.1006	0.232125			#N/A	P12960	Cntn1	Contactin-1	Cntn1	16.7266	0.483374			#N/A	O55026	Entpd2	Ectonucleoside triphosphate diphosphohydrolase 2	Entpd2	21.3681	0.720354				P45591	Cfl2	Cofilin-2	Cfl2	21.5537	0.811951
P23506	Pcmt1	Protein-L-isoaspartate(D-aspartate) O-methyltransferase	Pcmt1	18.8595	0.441093			#N/A	P12961	Scg5	Neuroendocrine protein 7B2	Scg5	19.2351	1.89369			#N/A	O55028	Bckdk	[3-methyl-2-oxobutanoate dehydrogenase [lipoamide]] kinase, mitochondrial	Bckdk	19.4564	1.07431				P45700	Man1a1	Mannosyl-oligosaccharide 1,2-alpha-mannosidase IA	Man1a1	20.4105	0.388256
P23591	Tsta3	GDP-L-fucose synthase	Tsta3	21.6972	0.429474			#N/A	P12970	Rpl7a	60S ribosomal protein L7a	Rpl7a	24.138	0.374565			#N/A	O55029	Copb2	Coatomer subunit beta'	Copb2	23.6879	0.14815				P45878	Fkbp2	Peptidyl-prolyl cis-trans isomerase FKBP2	Fkbp2	17.7469	1.68632
P23780	Glb1	Beta-galactosidase	Glb1	20.6234	0.697287			#N/A	P13011;P13516;Q99PL7	Scd1;Scd2;Scd3	Acyl-CoA desaturase 2	Scd1	17.9093	0.296723			#N/A	O55033	Nck2	Cytoplasmic protein NCK2	Nck2	18.8777	0.499416				P46061	Rangap1	Ran GTPase-activating protein 1	Rangap1	20.7471	0.667225
P23927	Cryab	Alpha-crystallin B chain	Cryab	20.824	0.716445			#N/A	P13020	Gsn	Gelsolin	Gsn	25.2878	0.592527			#N/A	O55057	Pde6d	Retinal rod rhodopsin-sensitive cGMP 3',5'-cyclic phosphodiesterase subunit delta	Pde6d	16.9856	1.29814				P46062	Sipa1	Signal-induced proliferation-associated protein 1	Sipa1	19.4405	0.802937
P23950	Zfp36l1	mRNA decay activator protein ZFP36L1	Zfp36l1	18.4911	0.836503			#N/A	P13412	Tnni2	Troponin I, fast skeletal muscle	Tnni2	23.5336	1.29351			#N/A	O55060	Tpmt	Thiopurine S-methyltransferase	Tpmt	17.7289	0.810952				P46096	Syt1	Synaptotagmin-1	Syt1	18.1035	0.722942
P23953	Ces1c	Carboxylesterase 1C	Ces1c	17.8252	0.34575			#N/A	P13439	Umps	Uridine 5'-monophosphate synthase	Umps	19.3975	0.737769			#N/A	O55091	Impact	Protein IMPACT	Impact	17.9771	0.470305				P46414	Cdkn1b	Cyclin-dependent kinase inhibitor 1B	Cdkn1b	20.2587	0.409194
P24270	Cat	Catalase	Cat	20.7763	0.544085			#N/A	P13541	Myh3	Myosin-3	Myh3	18.4783	2.88244			#N/A	O55098	Stk10	Serine/threonine-protein kinase 10	Stk10	18.0142	0.890997				P46460	Nsf	Vesicle-fusing ATPase	Nsf	21.626	0.179401
P24369	Ppib	Peptidyl-prolyl cis-trans isomerase B	Ppib	23.511	0.714876			#N/A	P13542	Myh8	Myosin-8	Myh8	26.8808	0.69301			#N/A	O55100	Syngr1	Synaptogyrin-1	Syngr1	17.6766	0.510894				P46467	Vps4b	Vacuolar protein sorting-associated protein 4B	Vps4b	20.5492	0.225401
P24452	Capg	Macrophage-capping protein	Capg	21.3484	0.45531			#N/A	P13595	Ncam1	Neural cell adhesion molecule 1	Ncam1	20.7513	0.406573			#N/A	O55101	Syngr2	Synaptogyrin-2	Syngr2	20.9179	0.434723				P46471	Psmc2	26S proteasome regulatory subunit 7	Psmc2	22.6943	0.217326
P24456	Cyp2d10	Cytochrome P450 2D10	Cyp2d10	17.5466	1.10462			#N/A	P13634	Ca1	Carbonic anhydrase 1	Ca1	25.7411	0.877792			#N/A	O55102	Bloc1s1	Biogenesis of lysosome-related organelles complex 1 subunit 1	Bloc1s1	15.8153	0.414116				P46638	Rab11b	Ras-related protein Rab-11B	Rab11b	23.8523	0.295678
P24472	Gsta4	Glutathione S-transferase A4	Gsta4	24.2472	0.379208			#N/A	P13707	Gpd1	Glycerol-3-phosphate dehydrogenase [NAD(+)], cytoplasmic	Gpd1	23.2472	1.19424			#N/A	O55106	Strn	Striatin	Strn	20.8802	0.152162				P46656	Fdx1	Adrenodoxin, mitochondrial	Fdx1	19.5044	0.737781
P24527	Lta4h	Leukotriene A-4 hydrolase	Lta4h	22.6082	0.290907			#N/A	P13745	Gsta1	Glutathione S-transferase A1	Gsta1	20.5163	0.35412			#N/A	O55111	Dsg2	Desmoglein-2	Dsg2	21.8165	0.38266				P46660	Ina	Alpha-internexin	Ina	20.2008	0.243437
P24547	Impdh2	Inosine-5'-monophosphate dehydrogenase 2	Impdh2	20.522	0.274839			#N/A	P14069	S100a6	Protein S100-A6	S100a6	26.1838	0.812693			#N/A	O55125	Nipsnap1	Protein NipSnap homolog 1	Nipsnap1	21.6514	0.452661				P46664	Adss	Adenylosuccinate synthetase isozyme 2	Adss	20.8855	0.628996
P24549	Aldh1a1	Retinal dehydrogenase 1	Aldh1a1	22.1252	0.385888			#N/A	P14094	Atp1b1	Sodium/potassium-transporting ATPase subunit beta-1	Atp1b1	24.04	0.328821			#N/A	O55126	Nipsnap2	Protein NipSnap homolog 2	Nipsnap2	22.1418	0.38444				P46735	Myo1b	Unconventional myosin-Ib	Myo1b	19.3739	0.31439
P24668	M6pr	Cation-dependent mannose-6-phosphate receptor	M6pr	22.2121	0.447261			#N/A	P14115	Rpl27a	60S ribosomal protein L27a	Rpl27a	23.7337	0.539776			#N/A	O55128	Sap18	Histone deacetylase complex subunit SAP18	Sap18	20.9145	0.307286				P46737	Brcc3	Lys-63-specific deubiquitinase BRCC36	Brcc3	19.7478	0.667879
P24788	Cdk11b	Cyclin-dependent kinase 11B	Cdk11b	19.0788	0.226617			#N/A	P14131	Rps16	40S ribosomal protein S16	Rps16	24.0564	0.187618			#N/A	O55131	2007-09-01	Septin-7	2007-09-01	23.2539	0.225799				P46935	Nedd4	E3 ubiquitin-protein ligase NEDD4	Nedd4	21.5856	0.338263
P25206	Mcm3	DNA replication licensing factor MCM3	Mcm3	20.9314	0.32617			#N/A	P14142	Slc2a4	Solute carrier family 2, facilitated glucose transporter member 4	Slc2a4	20.311	0.66207			#N/A	O55142	Rpl35a	60S ribosomal protein L35a	Rpl35a	23.1606	0.997726				P46938	Yap1	Transcriptional coactivator YAP1	Yap1	18.7663	1.39303
P25444	Rps2	40S ribosomal protein S2	Rps2	23.0165	0.480366			#N/A	P14148	Rpl7	60S ribosomal protein L7	Rpl7	24.3707	0.384643			#N/A	O55143	Atp2a2	Sarcoplasmic/endoplasmic reticulum calcium ATPase 2	Atp2a2	25.1527	0.257477				P46978	Stt3a	Dolichyl-diphosphooligosaccharide--protein glycosyltransferase subunit STT3A	Stt3a	22.3556	0.329482
P25911	Lyn	Tyrosine-protein kinase Lyn	Lyn	20.7252	0.285167			#N/A	P14152	Mdh1	Malate dehydrogenase, cytoplasmic	Mdh1	24.3162	0.908299			#N/A	O55222	Ilk	Integrin-linked protein kinase	Ilk	22.7509	0.360842				P47199	Cryz	Quinone oxidoreductase	Cryz	18.4314	0.740643
P25976	Ubtf	Nucleolar transcription factor 1	Ubtf	19.9951	0.104406			#N/A	P14206	Rpsa	40S ribosomal protein SA	Rpsa	23.932	0.52416			#N/A	O55229	Chkb	Choline/ethanolamine kinase	Chkb	18.3876	0.877932				P47226	Tes	Testin	Tes	22.4489	0.440384
P26040	Ezr	Ezrin	Ezr	23.896	0.227175			#N/A	P14211	Calr	Calreticulin	Calr	23.4515	0.273599			#N/A	O55234	Psmb5	Proteasome subunit beta type-5	Psmb5	22.3896	0.287855				P47713	Pla2g4a	Cytosolic phospholipase A2	Pla2g4a	19.6496	0.300569
P26041	Msn	Moesin	Msn	23.6846	0.289543			#N/A	P14432	H2-T3	H-2 class I histocompatibility antigen, TLA(B) alpha chain	H2-T3	18.6638	1.18133			#N/A	O70133	Dhx9	ATP-dependent RNA helicase A	Dhx9	22.3421	0.0524046				P47738	Aldh2	Aldehyde dehydrogenase, mitochondrial	Aldh2	24.9332	0.709673
P26043	Rdx	Radixin	Rdx	20.7179	0.36715			#N/A	P14576	Srp54	Signal recognition particle 54 kDa protein	Srp54	19.2991	0.55797			#N/A	O70138	Mmp8	Neutrophil collagenase	Mmp8	19.1588	0.48318				P47740	Aldh3a2	Fatty aldehyde dehydrogenase	Aldh3a2	20.4941	0.406791
P26150	Hsd3b3	3 beta-hydroxysteroid dehydrogenase/Delta 5-->4-isomerase type 3	Hsd3b3	18.8783	0.410582			#N/A	P14602	Hspb1	Heat shock protein beta-1	Hspb1	25.1096	0.420325			#N/A	O70152	Dpm1	Dolichol-phosphate mannosyltransferase subunit 1	Dpm1	20.8062	0.11159				P47753	Capza1	F-actin-capping protein subunit alpha-1	Capza1	21.8313	0.944465
P26231	Ctnna1	Catenin alpha-1	Ctnna1	23.2453	0.208057			#N/A	P14685	Psmd3	26S proteasome non-ATPase regulatory subunit 3	Psmd3	21.1185	0.464141			#N/A	O70172	Pip4k2a	Phosphatidylinositol 5-phosphate 4-kinase type-2 alpha	Pip4k2a	21.1733	0.741374				P47754	Capza2	F-actin-capping protein subunit alpha-2	Capza2	23.3185	0.852563
P26262	Klkb1	Plasma kallikrein	Klkb1	18.0526	0.153569			#N/A	P14824	Anxa6	Annexin A6	Anxa6	24.0299	0.290567			#N/A	O70194	Eif3d	Eukaryotic translation initiation factor 3 subunit D	Eif3d	21.5085	0.182185				P47757	Capzb	F-actin-capping protein subunit beta	Capzb	22.8327	0.542611
P26339	Chga	Chromogranin-A	Chga	21.3922	0.623607			#N/A	P14873	Map1b	Microtubule-associated protein 1B	Map1b	19.7691	0.447275			#N/A	O70209	Pdlim3	PDZ and LIM domain protein 3	Pdlim3	24.5076	0.498025				P47758	Srprb	Signal recognition particle receptor subunit beta	Srprb	20.0285	0.131149
P26350	Ptma	Prothymosin alpha	Ptma	22.7762	0.909962			#N/A	P15089	Cpa3	Mast cell carboxypeptidase A	Cpa3	21.0123	1.03005			#N/A	O70228	Atp9a	Probable phospholipid-transporting ATPase IIA	Atp9a	19.506	0.368111				P47802	Mtx1	Metaxin-1	Mtx1	20.7185	0.734872
P26369	U2af2	Splicing factor U2AF 65 kDa subunit	U2af2	20.6403	0.462234			#N/A	P15208	Insr	Insulin receptor	Insr	18.4482	0.533987			#N/A	O70250	Pgam2	Phosphoglycerate mutase 2	Pgam2	22.659	1.15766				P47809	Map2k4	Dual specificity mitogen-activated protein kinase kinase 4	Map2k4	19.6285	1.1122
P26443	Glud1	Glutamate dehydrogenase 1, mitochondrial	Glud1	23.4585	0.148076			#N/A	P15261	Ifngr1	Interferon gamma receptor 1	Ifngr1	18.352	1.31134			#N/A	O70251	Eef1b	Elongation factor 1-beta	Eef1b	22.9733	0.196208				P47811	Mapk14	Mitogen-activated protein kinase 14	Mapk14	19.7365	0.548065
P26450	Pik3r1	Phosphatidylinositol 3-kinase regulatory subunit alpha	Pik3r1	18.7215	0.539452			#N/A	P15327	Bpgm	Bisphosphoglycerate mutase	Bpgm	18.4546	0.168298			#N/A	O70258	Sgce	Epsilon-sarcoglycan	Sgce	20.3957	0.44375				P47856	Gfpt1	Glutamine--fructose-6-phosphate aminotransferase [isomerizing] 1	Gfpt1	23.4077	1.00736
P26516	Psmd7	26S proteasome non-ATPase regulatory subunit 7	Psmd7	19.8419	0.53195			#N/A	P15331	Prph	Peripherin	Prph	22.6232	0.566073			#N/A	O70274	Ptp4a2	Protein tyrosine phosphatase type IVA 2	Ptp4a2	20.3597	0.459252				P47857	Pfkm	ATP-dependent 6-phosphofructokinase, muscle type	Pfkm	19.7586	0.724369
P26618	Pdgfra	Platelet-derived growth factor receptor alpha	Pdgfra	18.0876	0.371426			#N/A	P15379	Cd44	CD44 antigen	Cd44	18.5086	1.03642			#N/A	O70279	Ess2	Splicing factor ESS-2 homolog	Ess2	17.0094	0.179253				P47867	Scg3	Secretogranin-3	Scg3	17.6527	0.909438
P26638	Sars	Serine--tRNA ligase, cytoplasmic	Sars	21.5006	0.235359			#N/A	P15508	Sptb	Spectrin beta chain, erythrocytic	Sptb	18.4098	0.563252			#N/A	O70293	Grk6	G protein-coupled receptor kinase 6	Grk6	17.1151	0.747038				P47879	Igfbp4	Insulin-like growth factor-binding protein 4	Igfbp4	17.9221	2.23075
P26883	Fkbp1a	Peptidyl-prolyl cis-trans isomerase FKBP1A	Fkbp1a	19.7327	0.451421			#N/A	P15532	Nme1	Nucleoside diphosphate kinase A	Nme1	22.8075	0.586091			#N/A	O70305	Atxn2	Ataxin-2	Atxn2	19.1923	0.685418				P47911	Rpl6	60S ribosomal protein L6	Rpl6	24.7155	0.218641
P27046	Man2a1	Alpha-mannosidase 2	Man2a1	19.5696	0.320921			#N/A	P15535	B4galt1	Beta-1,4-galactosyltransferase 1	B4galt1	17.5036	0.350408			#N/A	O70310	Nmt1	Glycylpeptide N-tetradecanoyltransferase 1	Nmt1	20.5969	0.611808				P47915	Rpl29	60S ribosomal protein L29	Rpl29	23.3642	1.1382
P27546	Map4	Microtubule-associated protein 4	Map4	22.0421	0.127241			#N/A	P15626	Gstm2	Glutathione S-transferase Mu 2	Gstm2	22.688	0.5913			#N/A	O70311	Nmt2	Glycylpeptide N-tetradecanoyltransferase 2	Nmt2	17.192	1.10662				P47934	Crat	Carnitine O-acetyltransferase	Crat	19.075	0.415175
P27573	Mpz	Myelin protein P0	Mpz	21.5344	0.8041			#N/A	P15864	Hist1h1c	Histone H1.2	Hist1h1c	24.611	0.601969			#N/A	O70318	Epb41l2	Band 4.1-like protein 2	Epb41l2	22.4942	0.217842				P47941	Crkl	Crk-like protein	Crkl	18.9219	0.546113
P27601	Gna13	Guanine nucleotide-binding protein subunit alpha-13	Gna13	20.614	0.344267			#N/A	P15947	Klk1	Kallikrein-1	Klk1	23.9599	0.37056			#N/A	O70325	Gpx4	Phospholipid hydroperoxide glutathione peroxidase	Gpx4	20.5442	0.411989				P47962	Rpl5	60S ribosomal protein L5	Rpl5	23.6411	0.48938
P27612	Plaa	Phospholipase A-2-activating protein	Plaa	20.6449	0.232974			#N/A	P16014	Chgb	Secretogranin-1	Chgb	19.4334	0.799846			#N/A	O70326	Grem1	Gremlin-1	Grem1	18.5417	1.19103				P47963	Rpl13	60S ribosomal protein L13	Rpl13	23.8324	0.564544
P27641	Xrcc5	X-ray repair cross-complementing protein 5	Xrcc5	20.5996	0.293719			#N/A	P16015	Ca3	Carbonic anhydrase 3	Ca3	27.7191	3.64099			#N/A	O70362	Gpld1	Phosphatidylinositol-glycan-specific phospholipase D	Gpld1	15.7872	1.41088				P47964	Rpl36	60S ribosomal protein L36	Rpl36	22.8502	0.362764
P27659	Rpl3	60S ribosomal protein L3	Rpl3	23.518	0.282213			#N/A	P16045	Lgals1	Galectin-1	Lgals1	24.0413	0.313006			#N/A	O70370	Ctss	Cathepsin S	Ctss	21.3771	0.564361				P47968	Rpia	Ribose-5-phosphate isomerase	Rpia	19.975	0.556366
P27773	Pdia3	Protein disulfide-isomerase A3	Pdia3	24.9268	0.220171			#N/A	P16110	Lgals3	Galectin-3	Lgals3	24.7733	0.395634			#N/A	O70373	Xirp1	Xin actin-binding repeat-containing protein 1	Xirp1	18.2696	1.46946				P48024	Eif1	Eukaryotic translation initiation factor 1	Eif1	21.3289	0.655353
P27808	Mgat1	Alpha-1,3-mannosyl-glycoprotein 2-beta-N-acetylglucosaminyltransferase	Mgat1	17.4617	0.685973			#N/A	P16125	Ldhb	L-lactate dehydrogenase B chain	Ldhb	21.6363	0.546192			#N/A	O70378	Emc8	ER membrane protein complex subunit 8	Emc8	21.1477	0.284766				P48036	Anxa5	Annexin A5	Anxa5	24.1739	0.791493
P28474	Adh5	Alcohol dehydrogenase class-3	Adh5	21.9172	0.17195			#N/A	P16254	Srp14	Signal recognition particle 14 kDa protein	Srp14	17.7135	0.191101			#N/A	O70400	Pdlim1	PDZ and LIM domain protein 1	Pdlim1	23.2627	0.338263				P48410	Abcd1	ATP-binding cassette sub-family D member 1	Abcd1	18.9733	0.492203
P28481	Col2a1	Collagen alpha-1(II) chain	Col2a1	20.046	0.611199			#N/A	P16330	Cnp	2',3'-cyclic-nucleotide 3'-phosphodiesterase	Cnp	19.3128	0.370389			#N/A	O70404	Vamp8	Vesicle-associated membrane protein 8	Vamp8	20.3941	0.264366				P48428	Tbca	Tubulin-specific chaperone A	Tbca	21.9863	1.067
P28574	Max	Protein max	Max	19.8773	0.408691			#N/A	P16332	Mut	Methylmalonyl-CoA mutase, mitochondrial	Mut	20.0297	0.409963			#N/A	O70421	Fzd1	Frizzled-1	Fzd1	19.8589	0.697826				P48453	Ppp3cb	Serine/threonine-protein phosphatase 2B catalytic subunit beta isoform	Ppp3cb	19.0091	0.367637
P28650	Adssl1	Adenylosuccinate synthetase isozyme 1	Adssl1	21.8157	1.26512			#N/A	P16406	Enpep	Glutamyl aminopeptidase	Enpep	19.456	0.596945			#N/A	O70423	Aoc3	Membrane primary amine oxidase	Aoc3	24.3828	0.441256				P48758	Cbr1	Carbonyl reductase [NADPH] 1	Cbr1	24.611	0.829918
P28653	Bgn	Biglycan	Bgn	23.3004	0.308977			#N/A	P16460	Ass1	Argininosuccinate synthase	Ass1	22.7309	0.223118			#N/A	O70433	Fhl2	Four and a half LIM domains protein 2	Fhl2	20.3654	0.558046				P48771	Cox7a2	Cytochrome c oxidase subunit 7A2, mitochondrial	Cox7a2	22.7108	0.499833
P28656	Nap1l1	Nucleosome assembly protein 1-like 1	Nap1l1	18.5046	0.152086			#N/A	P16546	Sptan1	Spectrin alpha chain, non-erythrocytic 1	Sptan1	23.4831	0.196126			#N/A	O70435	Psma3	Proteasome subunit alpha type-3	Psma3	22.6013	0.257736				P48774	Gstm5	Glutathione S-transferase Mu 5	Gstm5	19.3155	0.500833
P28659	Celf1	CUGBP Elav-like family member 1	Celf1	20.3292	0.857147			#N/A	P16675	Ctsa	Lysosomal protective protein	Ctsa	19.6418	0.953109			#N/A	O70439	Stx7	Syntaxin-7	Stx7	19.7526	0.287005				P48787	Tnni3	Troponin I, cardiac muscle	Tnni3	19.2388	0.474986
P28660	Nckap1	Nck-associated protein 1	Nckap1	20.9758	0.270104			#N/A	P16858	Gapdh	Glyceraldehyde-3-phosphate dehydrogenase	Gapdh	27.0331	0.451162			#N/A	O70456	Sfn	14-3-3 protein sigma	Sfn	22.4511	0.933829				P48962	Slc25a4	ADP/ATP translocase 1	Slc25a4	22.9265	0.529554
P28661	2004-09-01	Septin-4	2004-09-01	18.4901	0.304204			#N/A	P17012;P23607	Zfa;Zfx	Zinc finger X-chromosomal protein	Zfa	17.6452	1.72473			#N/A	O70475	Ugdh	UDP-glucose 6-dehydrogenase	Ugdh	22.4876	0.345442				P49025	Cit	Citron Rho-interacting kinase	Cit	22.4549	0.980222
P28665	Mug1	Murinoglobulin-1	Mug1	20.0398	0.236473			#N/A	P17047	Lamp2	Lysosome-associated membrane glycoprotein 2	Lamp2	21.8736	1.06684			#N/A	O70481	Ubr1	E3 ubiquitin-protein ligase UBR1	Ubr1	18.8907	0.673187				P49070	Camlg	Calcium signal-modulating cyclophilin ligand	Camlg	17.9344	0.323622
P28704	Rxrb	Retinoic acid receptor RXR-beta	Rxrb	16.0112	1.06724			#N/A	P17095	Hmga1	High mobility group protein HMG-I/HMG-Y	Hmga1	20.4014	1.20396			#N/A	O70493	Snx12	Sorting nexin-12	Snx12	21.8298	0.21446				P49138	Mapkapk2	MAP kinase-activated protein kinase 2	Mapkapk2	19.0903	0.429763
P28740	Kif2a	Kinesin-like protein KIF2A	Kif2a	19.9376	0.562392			#N/A	P17156	Hspa2	Heat shock-related 70 kDa protein 2	Hspa2	20.6516	1.09267			#N/A	O70503	Hsd17b12	Very-long-chain 3-oxoacyl-CoA reductase	Hsd17b12	21.2803	0.285519				P49290	Epx	Eosinophil peroxidase	Epx	22.1586	0.444411
P28776	Ido1	Indoleamine 2,3-dioxygenase 1	Ido1	21.4929	1.93631			#N/A	P17182	Eno1	Alpha-enolase	Eno1	24.231	0.435416			#N/A	O70548	Tcap	Telethonin	Tcap	19.1883	1.22173				P49312	Hnrnpa1	Heterogeneous nuclear ribonucleoprotein A1	Hnrnpa1	20.154	1.13511
P28825	Mep1a	Meprin A subunit alpha	Mep1a	19.4973	0.767566			#N/A	P17183	Eno2	Gamma-enolase	Eno2	19.1816	0.549908			#N/A	O70551	Srpk1	SRSF protein kinase 1	Srpk1	20.2709	0.323287				P49442	Inpp1	Inositol polyphosphate 1-phosphatase	Inpp1	18.771	0.530128
P28843	Dpp4	Dipeptidyl peptidase 4	Dpp4	20.173	0.401292			#N/A	P17225	Ptbp1	Polypyrimidine tract-binding protein 1	Ptbp1	22.0901	0.269775			#N/A	O70566	Diaph2	Protein diaphanous homolog 2	Diaph2	18.8064	0.29113				P49443	Ppm1a	Protein phosphatase 1A	Ppm1a	20.615	0.324188
P28867	Prkcd	Protein kinase C delta type	Prkcd	21.6682	0.562618			#N/A	P17426	Ap2a1	AP-2 complex subunit alpha-1	Ap2a1	20.7183	0.964349			#N/A	O70570	Pigr	Polymeric immunoglobulin receptor	Pigr	21.7719	0.869569				P49615	Cdk5	Cyclin-dependent-like kinase 5	Cdk5	18.8633	1.20878
P29341	Pabpc1	Polyadenylate-binding protein 1	Pabpc1	23.1252	0.379916			#N/A	P17427	Ap2a2	AP-2 complex subunit alpha-2	Ap2a2	20.9163	0.417833			#N/A	O70571	Pdk4	[Pyruvate dehydrogenase (acetyl-transferring)] kinase isozyme 4, mitochondrial	Pdk4	17.35	0.665283				P49717	Mcm4	DNA replication licensing factor MCM4	Mcm4	20.0497	0.480384
P29351	Ptpn6	Tyrosine-protein phosphatase non-receptor type 6	Ptpn6	19.6943	0.580356			#N/A	P17439	Gba	Glucosylceramidase	Gba	19.9706	0.354861			#N/A	O70572	Smpd2	Sphingomyelin phosphodiesterase 2	Smpd2	20.1339	0.487627				P49718	Mcm5	DNA replication licensing factor MCM5	Mcm5	21.0489	0.729414
P29391	Ftl1	Ferritin light chain 1	Ftl1	23.8291	0.397528			#N/A	P17563	Selenbp1	Methanethiol oxidase	Selenbp1	25.1824	0.370644			#N/A	O70583	Mid1	E3 ubiquitin-protein ligase Midline-1	Mid1	18.0896	0.401495				P49722	Psma2	Proteasome subunit alpha type-2	Psma2	23.3382	0.284724
P29416	Hexa	Beta-hexosaminidase subunit alpha	Hexa	21.3472	0.758399			#N/A	P17665	Cox7c	Cytochrome c oxidase subunit 7C, mitochondrial	Cox7c	21.2398	0.866645			#N/A	O70589	Cask	Peripheral plasma membrane protein CASK	Cask	19.2443	0.488234				P49769	Psen1	Presenilin-1	Psen1	18.5889	0.880862
P29452	Casp1	Caspase-1	Casp1	21.556	0.45377			#N/A	P17710	Hk1	Hexokinase-1	Hk1	23.5962	0.641114			#N/A	O70591	Pfdn2	Prefoldin subunit 2	Pfdn2	21.0977	0.344523				P49935	Ctsh	Pro-cathepsin H	Ctsh	19.1818	1.41908
P29595	Nedd8	NEDD8	Nedd8	22.051	0.871997			#N/A	P17742	Ppia	Peptidyl-prolyl cis-trans isomerase A	Ppia	24.8407	0.661265			#N/A	O70628	Pde9a	High affinity cGMP-specific 3',5'-cyclic phosphodiesterase 9A	Pde9a	16.7052	1.18846				P50136	Bckdha	2-oxoisovalerate dehydrogenase subunit alpha, mitochondrial	Bckdha	18.7473	0.822785
P29699	Ahsg	Alpha-2-HS-glycoprotein	Ahsg	20.3172	0.505485			#N/A	P17751	Tpi1	Triosephosphate isomerase	Tpi1	24.7758	0.635714			#N/A	O88207	Col5a1	Collagen alpha-1(V) chain	Col5a1	23.2368	0.457868				P50171	Hsd17b8	Estradiol 17-beta-dehydrogenase 8	Hsd17b8	20.5984	0.536506
P29758	Oat	Ornithine aminotransferase, mitochondrial	Oat	22.8113	0.286743			#N/A	P17897	Lyz1	Lysozyme C-1	Lyz1	19.2666	0.662121			#N/A	O88286	Wiz	Protein Wiz	Wiz	17.6138	0.568691				P50247	Ahcy	Adenosylhomocysteinase	Ahcy	23.4989	0.558511
P29788	Vtn	Vitronectin	Vtn	18.6819	0.306617			#N/A	P17918	Pcna	Proliferating cell nuclear antigen	Pcna	20.0079	0.384689			#N/A	O88291	Znf326	DBIRD complex subunit ZNF326	Znf326	18.6115	0.202671				P50285	Fmo1	Dimethylaniline monooxygenase [N-oxide-forming] 1	Fmo1	17.4856	1.34912
P30115	Gsta3	Glutathione S-transferase A3	Gsta3	22.375	0.990321			#N/A	P18052	Ptpra	Receptor-type tyrosine-protein phosphatase alpha	Ptpra	18.9086	1.07616			#N/A	O88312	Agr2	Anterior gradient protein 2 homolog	Agr2	26.1568	0.901471				P50295	Nat2	Arylamine N-acetyltransferase 2	Nat2	20.2753	0.732901
P30275	Ckmt1	Creatine kinase U-type, mitochondrial	Ckmt1	26.4238	0.512386			#N/A	P18242	Ctsd	Cathepsin D	Ctsd	20.9751	1.02251			#N/A	O88322	Nid2	Nidogen-2	Nid2	22.1101	0.238994				P50427	Sts	Steryl-sulfatase	Sts	20.1549	0.5819
P30285	Cdk4	Cyclin-dependent kinase 4	Cdk4	18.6077	0.219532			#N/A	P18419	Svs4	Seminal vesicle secretory protein 4	Svs4	26.0747	1.22469			#N/A	O88325	Naglu	Alpha-N-acetylglucosaminidase	Naglu	19.2425	0.852599				P50429	Arsb	Arylsulfatase B	Arsb	17.8138	0.338764
P30355	Alox5ap	Arachidonate 5-lipoxygenase-activating protein	Alox5ap	20.4031	1.20097			#N/A	P18572	Bsg	Basigin	Bsg	23.9436	1.40623			#N/A	O88327	Ctnnal1	Alpha-catulin	Ctnnal1	19.3643	0.586342				P50431	Shmt1	Serine hydroxymethyltransferase, cytosolic	Shmt1	21.6265	0.589559
P30416	Fkbp4	Peptidyl-prolyl cis-trans isomerase FKBP4	Fkbp4	21.3414	0.251155			#N/A	P18653	Rps6ka1	Ribosomal protein S6 kinase alpha-1	Rps6ka1	21.8975	0.222191			#N/A	O88329	Myo1a	Unconventional myosin-Ia	Myo1a	21.8271	0.618771				P50446	Krt6a	Keratin, type II cytoskeletal 6A	Krt6a	24.9078	1.22705
P30677	Gna14	Guanine nucleotide-binding protein subunit alpha-14	Gna14	18.95	0.297408			#N/A	P18760	Cfl1	Cofilin-1	Cfl1	24.4644	0.394105			#N/A	O88342	Wdr1	WD repeat-containing protein 1	Wdr1	24.3305	0.118239				P50462	Csrp3	Cysteine and glycine-rich protein 3	Csrp3	19.6115	2.03507
P30681	Hmgb2	High mobility group protein B2	Hmgb2	21.768	0.663752			#N/A	P18826	Phka1	Phosphorylase b kinase regulatory subunit alpha, skeletal muscle isoform	Phka1	18.1269	0.902585			#N/A	O88343	Slc4a4	Electrogenic sodium bicarbonate cotransporter 1	Slc4a4	18.5345	0.602283				P50516	Atp6v1a	V-type proton ATPase catalytic subunit A	Atp6v1a	22.5788	0.375089
P30933	Svs5	Seminal vesicle secretory protein 5	Svs5	21.7393	3.46909			#N/A	P18872	Gnao1	Guanine nucleotide-binding protein G(o) subunit alpha	Gnao1	21.3168	0.190984			#N/A	O88351	Ikbkb	Inhibitor of nuclear factor kappa-B kinase subunit beta	Ikbkb	20.1114	0.198187				P50518	Atp6v1e1	V-type proton ATPase subunit E 1	Atp6v1e1	21.7251	0.708156
P30999	Ctnnd1	Catenin delta-1	Ctnnd1	22.7683	0.159674			#N/A	P19001	Krt19	Keratin, type I cytoskeletal 19	Krt19	28.3802	0.14813			#N/A	O88379	Baz1a	Bromodomain adjacent to zinc finger domain protein 1A	Baz1a	17.7675	0.469655				P50543	S100a11	Protein S100-A11	S100a11	18.9452	0.591423
P31001	Des	Desmin	Des	28.2953	0.251595			#N/A	P19096	Fasn	Fatty acid synthase	Fasn	22.7481	0.106838			#N/A	O88393	Tgfbr3	Transforming growth factor beta receptor type 3	Tgfbr3	18.7938	0.585859				P50544	Acadvl	Very long-chain specific acyl-CoA dehydrogenase, mitochondrial	Acadvl	22.3151	0.514707
P31230	Aimp1	Aminoacyl tRNA synthase complex-interacting multifunctional protein 1	Aimp1	20.4208	0.247693			#N/A	P19137	Lama1	Laminin subunit alpha-1	Lama1	20.5873	0.433151			#N/A	O88398	Avil	Advillin	Avil	17.7615	0.367079				P51125	Cast	Calpastatin	Cast	21.033	0.481828
P31428	Dpep1	Dipeptidase 1	Dpep1	21.0554	0.425238			#N/A	P19157	Gstp1	Glutathione S-transferase P 1	Gstp1	24.1968	0.372259			#N/A	O88441	Mtx2	Metaxin-2	Mtx2	19.6241	0.693545				P51150	Rab7a	Ras-related protein Rab-7a	Rab7a	22.7986	0.330109
P31725	S100a9	Protein S100-A9	S100a9	18.4328	0.978428			#N/A	P19221	F2	Prothrombin	F2	17.4232	0.719647			#N/A	O88447	Klc1	Kinesin light chain 1	Klc1	19.242	0.928589				P51162	Fabp6	Gastrotropin	Fabp6	20.365	1.76615
P31750	Akt1	RAC-alpha serine/threonine-protein kinase	Akt1	18.5548	0.445603			#N/A	P19253	Rpl13a	60S ribosomal protein L13a	Rpl13a	20.7029	0.862517			#N/A	O88448	Klc2	Kinesin light chain 2	Klc2	20.1077	0.194468				P51174	Acadl	Long-chain specific acyl-CoA dehydrogenase, mitochondrial	Acadl	21.9996	0.626182
P31809	Ceacam1	Carcinoembryonic antigen-related cell adhesion molecule 1	Ceacam1	20.9072	0.539141			#N/A	P19324	Serpinh1	Serpin H1	Serpinh1	21.5741	0.631039			#N/A	O88451	Rdh7	Retinol dehydrogenase 7	Rdh7	18.9753	0.773197				P51175	Ppox	Protoporphyrinogen oxidase	Ppox	17.5448	1.19374
P31938	Map2k1	Dual specificity mitogen-activated protein kinase kinase 1	Map2k1	22.3908	0.274998			#N/A	P19426	Nelfe	Negative elongation factor E	Nelfe	18.2711	0.59163			#N/A	O88456	Capns1	Calpain small subunit 1	Capns1	21.3901	0.290993				P51410	Rpl9	60S ribosomal protein L9	Rpl9	23.2755	0.719804
P31996	Cd68	Macrosialin	Cd68	20.1759	0.386184			#N/A	P19467	Muc13	Mucin-13	Muc13	22.7683	0.915422			#N/A	O88487	Dync1i2	Cytoplasmic dynein 1 intermediate chain 2	Dync1i2	22.7077	0.186583				P51432	Plcb3	1-phosphatidylinositol 4,5-bisphosphate phosphodiesterase beta-3	Plcb3	22.1946	0.693003
P32020	Scp2	Non-specific lipid-transfer protein	Scp2	20.8364	0.17729			#N/A	P19536	Cox5b	Cytochrome c oxidase subunit 5B, mitochondrial	Cox5b	20.8944	1.49689			#N/A	O88492	Plin4	Perilipin-4	Plin4	20.9517	0.359407				P51658	Hsd17b2	Estradiol 17-beta-dehydrogenase 2	Hsd17b2	20.6064	1.22337
P32067	Ssb	Lupus La protein homolog	Ssb	21.8131	0.387465			#N/A	P19639	Gstm3	Glutathione S-transferase Mu 3	Gstm3	22.1109	0.458605			#N/A	O88512	Ap1g2	AP-1 complex subunit gamma-like 2	Ap1g2	20.3666	0.435483				P51660	Hsd17b4	Peroxisomal multifunctional enzyme type 2	Hsd17b4	21.7174	0.3167
P32233	Drg1	Developmentally-regulated GTP-binding protein 1	Drg1	19.4084	0.449919			#N/A	P19783	Cox4i1	Cytochrome c oxidase subunit 4 isoform 1, mitochondrial	Cox4i1	24.0611	0.425797			#N/A	O88520	Shoc2	Leucine-rich repeat protein SHOC-2	Shoc2	19.102	0.170657				P51661	Hsd11b2	Corticosteroid 11-beta-dehydrogenase isozyme 2	Hsd11b2	21.9836	0.693287
P32261	Serpinc1	Antithrombin-III	Serpinc1	21.7363	0.196015			#N/A	P19973	Lsp1	Lymphocyte-specific protein 1	Lsp1	19.0267	0.628769			#N/A	O88531	Ppt1	Palmitoyl-protein thioesterase 1	Ppt1	18.5663	0.479041				P51667	Myl2	Myosin regulatory light chain 2, ventricular/cardiac muscle isoform	Myl2	21.7873	0.911168
P32507	Nectin2	Nectin-2	Nectin2	19.4559	0.188691			#N/A	P20060	Hexb	Beta-hexosaminidase subunit beta	Hexb	22.0782	0.568051			#N/A	O88532	Zfr	Zinc finger RNA-binding protein	Zfr	18.5488	0.180079				P51807	Dynlt1	Dynein light chain Tctex-type 1	Dynlt1	18.6017	0.366153
P32648	Vip	VIP peptides	Vip	20.994	0.990289			#N/A	P20108	Prdx3	Thioredoxin-dependent peroxide reductase, mitochondrial	Prdx3	24.1614	0.449253			#N/A	O88533	Ddc	Aromatic-L-amino-acid decarboxylase	Ddc	18.3003	1.24773				P51855	Gss	Glutathione synthetase	Gss	22.2455	0.652596
[truncated: 4,826 more rows]
[truncated: 21 more columns]

## Sheet: 02_Venn_CellType_counting(mean)
		Control (5288)				MNP (5207)				DSS (6148)				DSS+MNP (4568)
[truncated: 28 more rows]

[truncated: 6 more sheets: 04a_cluster 296, 04b_cluster 900, 04c_cluster 510, 04d_cluster 3- 1315, 04e_cluster2-1245, 04f_cluster1-1329 prot]
