# Supplementary material for: Polystyrene micro- and nanoplastics in a colitis mouse model – effects on biodistribution, macrophage polarization, and gut microbiome
Source: Research Square preprint supplement (doi:10.21203/rs.3.rs-7175706/v1), 2025-08-29
Supplement: Supplementary file 2 [file 3ec07671ce84eb4d58c677c3.xlsx]

## Sheet: Description
	Supplementary data 2: Macrophage M1 and M2 protein signatures in colon
	sheet 01a	"Statistics all data": Raw-data with Cell-type signature annotations*, results from pairwise comparative analysis
	sheet 01b	list of significant upregulated proteins-->Input for Venn-Diagram Fig. 5D upper
	sheet 01c	list of significant downregulated proteins-->Input for Venn-Diagram Fig. 5D lower
	sheet 02	Qualitative and quantitative comparisons MNP vs ctrl-->Supl. Figure 3D
	sheet 03	Qualitative and quantitative comparisons DSS vs ctrl-->Supl. Figure 3E
	sheet 04	Qualitative and quantitative comparisons DSS+MNP vs DSS-->Supl. Figure 3G
	sheet 05	Qualitative and quantitative comparisons DSS+MNP vs MNP-->Supl. Figure 3F
	sheet 06	Qualitative and quantitative comparisons DSS+MNP vs ctrl
	sheet 07	Qualitative and quantitative comparisons DSS vs MNP
	sheet 08a	Venn(4): Interesctions of upregulated proteins (MNP vs Ctrl, DSS vs Ctrl, DSSMNP vs DSS, DSS+MNP vs MNP)-> Figure 5D upper
	sheet 08b	Venn(4): Interesctions of downregulated proteins (MNP vs Ctrl, DSS vs Ctrl, DSSMNP vs DSS, DSS+MNP vs MNP)->Figure 5D lower
	sheet 09a	Venn(3): Intersection of upregulated proteins (MNP vs Ctrl, DSS vs Ctrl, DSSMNP vs DSS)->Supl Figure 3
	sheet 09b	Venn(3): Intersection of downregulated proteins (MNP vs Ctrl, DSS vs Ctrl, DSSMNP vs DSS)-->Supl Figure 3
	sheet 10	Heatmap sigM1_data-->Figure 5E
	sheet 11	Heatmap sigM2_data-->Figue 5E
	sheet 12	CellTypes-individual samples-->Source Data for Figure 5B
	* Cell-type signatures annotations
	Categories M1_M2 Orecchioni M et al. 2019, doi: 10.3389/fimmu.2019.01084
	Categories Yin J et al. 2023, doi.org/10.1038/s41421-023-00578-4
	Categories Duguet F et al. 2017, DOI: 10.1074/mcp.M116.062745
	Category in-vitro (in-house), unpublished

## Sheet: 01a_Statistcsall Data
				Comparisons MNP vs Control								Comparisons DSS vs Control								Comparisons DSS+MNP vs DSS								Comparisons DSS+MNP vs MNP								Comparisons DSS+MNP vs Control								Comparisons DSS vs MNP
Protein.Group	Genes	First.Protein.Description	Gene	FC (lg2) MNP vs Ctrl	p-value MNP vs Ctrl	q-Value MNP vs Ctrl	T-test statMNP vs Ctrl	MNP vs Ctrl: sig.FC>0	MNP vs Ctrl: sig.FC<0	471 ctrl (MNP) only	255 MNP only	FC (lg2) DSS vs Ctrl	p-Value DSS vs Ctrl	q-Value DSS vs Ctrl	T-test statDSS vs Ctrl	DSS vs Ctrl: sig.FC>0	DSS vs Ctrl: sig.FC<0	109 ctrl (DSS) only	969 DSS only	FC (lg2) DSS+MNP vs DSS	p-Value DSS+MNP vs DSS	q-Value DSS+MNP vs DSS	T-test stat DSS+MNP vs DSS	DSS+MNP vs DSS: sig.FC>0	DSS+MNP vs DSS: sig.FC<0	1607 DSS(DM) only	27 DM (DSS) only	FC (lg2) DSSMNP vs MNP	p-value DSSMNP vs MNP	q-value DSSMNP vs MNP	T-test Test stat DSSMNP vs MNP	DSSMNP vs MNP: sig.FC>0	DSSMNP vs MNP: sig.FC<0	336 DSSMNP only (vs MNP)	840 MNP only (vs DSSMNP)	FC (lg2) DSSMNP vs Ctrl	p-Value DSSMNP vs Ctrl	q-Value DSSMNP vs Ctrl	T-test statDSSMNP vs Ctrl	DSS+MNP vs Ctrl: sig.FC>0	DSS+MNP vs Ctrl: sig.FC<0	945 ctrl(DM) only	225 DM only	FC (lg2) DSS vs MNP	p-value DSS vs MNP	q-value DSS vs MNP	T-test Test stat DSS vs MNP	DSS vs MNP: sig.FC>0	DSS vs MNP: sig.FC<0
Q61830	Mrc1	Macrophage mannose receptor 1	Mrc1	-0.524689	1.60601	0.483798	-2.75742	-	-			0.473242	0.642132	0.424432	1.29375	-	-			-0.16006	0.153845	0.960658	-0.39547	-	-			0.837859	1.8483	0.137234	3.12223					0.313182	0.495076	0.690787	1.08438	-	-			0.997948	2.07622	0.0361231	3.20429	+
A0A286YCV9	Kif13b	Kinesin family member 13B	Kif13b	0.198143	0.415195	0.845078	0.909627	-	-			-0.36016	0.938087	0.264427	-1.70981	-	-			-0.258468	0.295263	0.908493	-0.68447	-	-			-0.816769	1.16157	0.3013	-2.01561					-0.618628	0.740352	0.531601	-1.4253	-	-			-0.558297	2.62769	0.0137778	-3.92885		+
A2ASQ1	Agrn	Agrin	Agrn	0.258486	0.2911	0.904785	0.680618	-	-			0.337811	0.442316	0.580885	0.952825	-	-			-0.631532	1.04515	0.630014	-1.85793	-	-			-0.5522	0.796415	0.453649	-1.51869					-0.293721	0.301796	0.815077	-0.701285	-	-			0.0793383	0.0993893	0.886544	0.265617
A7UAK5	Pfkfb3	6-phosphofructo-2-kinase/fructose-2, 6-biphosphatase 3 splice variant 2	Pfkfb3					-	-							-	-			0			0	-	-			NaN	NaN	NaN	NaN									-	-			NaN	NaN	NaN	NaN
E9Q236	Abcc4	ATP-binding cassette, sub-family C (CFTR/MRP), member 4	Abcc4	0.305417	0.317319	0.89384	0.73801	-	-			0.618026	1.45493	0.110228	2.47844	-	-			-0.313691	0.666453	0.755912	-1.33218	-	-			-0.00108322	0.000901454	0.994897	-0.00268106					0.304335	0.451748	0.721353	1.00568	-	-			0.312602	0.471179	0.542377	1.00189
E9QAM5	Helz2	Helicase with zinc finger domain 2	Helz2	-0.170142	0.1696	0.952474	-0.43493	-	-			0.115996	0.205722	0.790947	0.509441	-	-			-0.0675937	0.102912	0.975433	-0.275678	-	-			0.218535	0.216464	0.85564	0.537641					0.0484028	0.0534314	0.960916	0.151911	-	-			0.286131	0.449681	0.560245	0.96968
F7BJB9	Morc3	MORC family CW-type zinc finger protein 3	Morc3					-	-							-	-			0			0	-	-			NaN	NaN	NaN	NaN									-	-			NaN	NaN	NaN	NaN
G3UZ78	Adgb	Androglobin	Adgb					-	-							-	-			0			0	-	-			NaN	NaN	NaN	NaN				+					-	-			1.18638	0.51329	0.504721	1.11705
H3BJD6	Ppp1r9a	Protein phosphatase 1, regulatory subunit 9A	Ppp1r9a					-	-							-	-			0			0	-	-			NaN	NaN	NaN	NaN				+					-	-			NaN	NaN	NaN	NaN
O08528	Hk2	Hexokinase-2	Hk2	-0.343315	0.546825	0.789968	-1.13235	-	-			-0.260427	0.700935	0.385771	-1.36639	-	-			0.0264969	0.0422452	0.990989	0.118918	-	-			0.109354	0.133159	0.9195	0.345907					-0.23393	0.468074	0.710644	-0.996657	-	-			0.0828832	0.109837	0.877957	0.290902
O08691	Arg2	Arginase-2, mitochondrial	Arg2					-	-							-	-		+	0			0	-	-	+		NaN	NaN	NaN	NaN									-	-			NaN	NaN	NaN	NaN
O08784	Tcof1	Treacle protein	Tcof1	-0.00590483	0.00471565	0.993676	-0.0139641	-	-			0.316575	0.7537	0.35692	1.44506	-	-			0.0554715	0.0818435	0.98145	0.222186	-	-			0.377925	0.368072	0.747495	0.834003					0.372046	0.683556	0.567808	1.34856	-	-			0.32246	0.374763	0.623244	0.841381
O35099	Map3k5	Mitogen-activated protein kinase kinase kinase 5	Map3k5					-	-							-	-			0			0	-	-			NaN	NaN	NaN	NaN									-	-			NaN	NaN	NaN	NaN
O35309	Nmi	N-myc-interactor	Nmi	-0.0896284	0.0899796	0.967055	-0.244673	-	-			0.147276	0.428751	0.593197	0.938261	-	-			-0.0198958	0.0408044	0.991242	-0.115516	-	-			0.217026	0.266058	0.82325	0.633886					0.12738	0.309899	0.812318	0.72861	-	-			0.236895	0.366897	0.629774	0.819979
O35344	Kpna3	Importin subunit alpha-4	Kpna3	0.14018	0.16819	0.95128	0.429481	-	-			0.349552	0.732751	0.368839	1.43528	-	-			-0.556922	1.22115	0.592166	-2.18812	-	-			-0.347567	0.441856	0.68843	-0.976108					-0.207371	0.299854	0.817452	-0.724277	-	-			0.209366	0.35617	0.639571	0.800474
O35424	H2-Ob	Histocompatibility 2, O region beta locus	H2-Ob					-	-							-	-			0			0	-	-			NaN	NaN	NaN	NaN									-	-			NaN	NaN	NaN	NaN
O35448	Ppt2	Lysosomal thioesterase PPT2	Ppt2					-	-							-	-			0			0	-	-			NaN	NaN	NaN	NaN									-	-			NaN	NaN	NaN	NaN
O35657	Neu1	Sialidase-1	Neu1	-0.0818564	0.0689226	0.970304	-0.189814	-	-			-1.11849	1.51534	0.0997423	-2.4809	-	-			0.752322	0.963474	0.645897	1.78001	-	-			-0.28435	0.347928	0.761532	-0.796337					-0.366169	0.289477	0.821903	-0.683695	-	-			-1.03664	1.93994	0.0448161	-3.02836
O35711	Ppfibp2	Liprin-beta-2	Ppfibp2					-	-							-	-			0			0	-	-			NaN	NaN	NaN	NaN				+					-	-			-0.849016	0.594273	0.443666	-1.28678
O35892	Sp100	Nuclear autoantigen Sp-100	Sp100	-0.758485	0.72325	0.714487	-1.43528	-	-			1.19762	1.99462	0.0464652	3.16198	-	-			-0.494243	0.360553	0.882306	-0.811515	-	-			1.46188	1.00712	0.354383	1.87022					0.703376	0.424544	0.735692	0.93689	-	-			1.9561	3.05091	0.00689503	4.66363	+
O35954	Pitpnm1	Membrane-associated phosphatidylinositol transfer protein 1	Pitpnm1	0.0147966	0.00721769	0.992828	0.0217114	-	-			0.532322	0.731044	0.368613	1.49412	-	-			-0.278153	0.440906	0.851541	-0.985753	-	-			0.239366	0.141824	0.912702	0.37735					0.254169	0.259678	0.841347	0.652035	-	-			0.51754	0.469225	0.543753	1.02506
O35955	Psmb10	Proteasome subunit beta type-10	Psmb10	-0.33998	0.223896	0.934524	-0.545784	-	-			0.393326	0.50292	0.525018	1.05486	-	-			0.257474	0.285956	0.909495	0.666567	-	-			0.990765	0.888716	0.410049	1.64026					0.6508	1.16152	0.320786	2.01555	-	-			0.733307	0.567656	0.46201	1.15999
O54901	Cd200	OX-2 membrane glycoprotein	Cd200	0.370143	0.22058	0.936575	0.550654	-	-			0.663488	0.867083	0.298755	1.68526	-	-			-0.706212	0.46413	0.842977	-1.01599	-	-			-0.412867	0.172746	0.886525	-0.445149					-0.0427246	0.01503	0.986125	-0.045374	-	-			0.293366	0.234065	0.751767	0.568872
O55135	Eif6	Eukaryotic translation initiation factor 6	Eif6	-0.477177	1.99766	0.403795	-3.16611	-	-			-0.23714	0.563222	0.476228	-1.15291	-	-			-0.181742	0.259378	0.917135	-0.614548	-	-			0.0582907	0.0753546	0.948788	0.205797					-0.418882	0.759407	0.517863	-1.45348	-	-			0.240019	0.59798	0.44065	1.20805
O70622	Rtn2	Reticulon-2	Rtn2	-0.101363	0.0759782	0.970406	-0.211495	-	-			-0.248199	0.118164	0.868375	-0.320162	-	-			0			0	-	-			NaN	NaN	NaN	NaN				+					-	-			-0.146845	0.084797	0.901007	-0.232733
O88792	F11r	Junctional adhesion molecule A	F11r	-0.562452	0.959338	0.625637	-1.75485	-	-			-0.34579	0.836745	0.312917	-1.56606	-	-			-0.175917	0.136034	0.966338	-0.351809	-	-			0.0407528	0.0245656	0.982246	0.0705714					-0.521707	0.44435	0.724697	-0.956313	-	-			0.216653	0.326085	0.66856	0.74486
O89001	Cpd	Carboxypeptidase D	Cpd	0.062288	0.12509	0.961766	0.328924	-	-			-0.133602	0.20829	0.788774	-0.513095	-	-			-0.364536	0.384421	0.87761	-0.854847	-	-			-0.560423	0.680193	0.525205	-1.35373					-0.498138	0.501206	0.68662	-1.07115	-	-			-0.195898	0.387293	0.612856	-0.856622
O89116	Vti1a	Vesicle transport through interaction with t-SNAREs homolog 1A	Vti1a	0.797822	1.38686	0.517622	2.59323	-	-			0.683373	1.23857	0.158605	2.26699	-	-			0.562806	0.48406	0.83162	1.0416	-	-			0.44838	0.326588	0.779461	0.761152					1.24618	0.723876	0.542582	1.52054	-	-			-0.11442	0.245931	0.738951	-0.593228
P01901	H2-K1	H-2 class I histocompatibility antigen, K-B alpha chain	H2-K1	-0.0259879	0.0552753	0.97761	-0.154238	-	-			1.32735	3.67861	0.00548315	5.42181	+	-			-0.509408	0.478298	0.835353	-1.00999	-	-			0.843926	0.888804	0.410287	1.64039					0.817942	0.865648	0.456054	1.60746	-	-			1.35331	3.58483	0.0041165	5.28041	+
P04186	Cfb	Complement factor B	Cfb	0.439657	0.604387	0.772493	1.24414	-	-			1.55495	3.18319	0.0103791	4.69459	+	-			-0.773806	0.711426	0.744348	-1.37472	-	-			0.341468	0.190004	0.871621	0.475661					0.781146	0.622666	0.603299	1.24666	-	-			1.11528	2.52877	0.0161576	4.033	+
P04918	Saa3	Serum amyloid A-3 protein	Saa3					-	-							-	-		+	1.02032	0.365497	0.878733	0.835502	-	-			NaN	NaN	NaN	NaN			+						-	-		+	NaN	NaN	NaN	NaN
P05480	Src	Neuronal proto-oncogene tyrosine-protein kinase Src	Src	-0.0502764	0.0732946	0.97104	-0.201029	-	-			-0.0272578	0.0603613	0.937435	-0.16721	-	-			0.120719	0.304676	0.902845	0.702416	-	-			0.143719	0.242018	0.836208	0.581277					0.093461	0.161195	0.900945	0.409645	-	-			0.023005	0.043243	0.945231	0.121836
P05622	Pdgfrb	Platelet-derived growth factor receptor beta	Pdgfrb	0.432758	0.214342	0.938245	0.551801	-	-			0.937677	0.735723	0.367107	1.47478	-	-			0			0	-	-			NaN	NaN	NaN	NaN				+					-	-			0.504966	0.331337	0.663013	0.770339
P06801	Me1	NADP-dependent malic enzyme	Me1	-0.899387	0.998878	0.610994	-1.81088	-	-			-0.110934	0.0910579	0.900979	-0.245151	-	-			-0.0812342	0.117421	0.972665	-0.308999	-	-			0.707217	1.43701	0.211626	2.41199					-0.192168	0.171623	0.894846	-0.433916	-	-			0.788448	1.42105	0.107495	2.3583
P08103	Hck	Tyrosine-protein kinase HCK	Hck	-0.527901	0.67146	0.739636	-1.39287	-	-			-0.0381367	0.0635931	0.933404	-0.176528	-	-			0.0308042	0.0723148	0.986357	0.199812	-	-			0.52055	0.758826	0.47627	1.58309					-0.00733252	0.00961894	0.988084	-0.028453	-	-			0.489734	0.938151	0.249792	1.7975
P08122	Col4a2	Collagen alpha-2(IV) chain	Col4a2	0.137683	0.206519	0.940699	0.50935	-	-			0.283477	0.400741	0.614122	0.880479	-	-			0.00122125	0.00127506	0.999505	0.00375152	-	-			0.147019	0.207276	0.86205	0.50949					0.284698	0.412016	0.749905	0.900305	-	-			0.14579	0.200178	0.785354	0.494473
P09450	Junb	Transcription factor jun-B	Junb					-	-							-	-		+	-1.24994	0.681699	0.749126	-1.38661	-	-			NaN	NaN	NaN	NaN			+						-	-		+	NaN	NaN	NaN	NaN
P09671	Sod2	Superoxide dismutase [Mn], mitochondrial	Sod2	0.639639	1.24426	0.565146	2.15086	-	-			0.24048	0.35717	0.652175	0.802299	-	-			-0.198677	0.321852	0.896713	-0.734771	-	-			-0.597848	1.33078	0.242817	-2.24014					0.041803	0.042724	0.967167	0.120437	-	-			-0.399162	1.13599	0.177676	-1.98123
P10810	Cd14	Monocyte differentiation antigen CD14	Cd14					-	-							-	-		+	0			0	-	-	+		NaN	NaN	NaN	NaN									-	-			NaN	NaN	NaN	NaN
P10852	Slc3a2	4F2 cell-surface antigen heavy chain	Slc3a2	-0.190898	0.574864	0.786474	-1.17777	-	-			0.587037	3.14729	0.0114177	4.64368	+	-			-0.13137	0.371716	0.878241	-0.826046	-	-			0.646536	2.22968	0.0904156	3.40348	+				0.455667	1.70539	0.168111	2.72635	-	-			0.777907	3.40031	0.00433588	5.00746	+
P11404	Fabp3	Fatty acid-binding protein, heart	Fabp3	-0.0758247	0.0754449	0.970592	-0.206514	-	-			0.14758	0.160878	0.833206	0.408939	-	-			0.0279157	0.0154079	0.998142	0.0446202	-	-			0.251352	0.146399	0.911557	0.376314					0.175495	0.102464	0.932059	0.273102	-	-			0.223424	0.228002	0.759288	0.552645
P11672	Lcn2	Neutrophil gelatinase-associated lipocalin	Lcn2					-	-							-	-			0			0	-	-			NaN	NaN	NaN	NaN									-	-			NaN	NaN	NaN	NaN
P11688	Itga5	Integrin alpha-5	Itga5	-0.344949	0.483703	0.820915	-1.02767	-	-			0.267464	0.639966	0.425873	1.27347	-	-			-0.320102	0.627336	0.762959	-1.24791	-	-			0.2923	0.36393	0.748775	0.814601					-0.0526378	0.0625985	0.952145	-0.173034	-	-			0.612414	1.27058	0.141299	2.16078
P12382	Pfkl	ATP-dependent 6-phosphofructokinase, liver type	Pfkl	0.900727	1.18445	0.571496	2.06898	-	-			0.506837	0.623874	0.435974	1.24854	-	-			-0.727971	0.988173	0.655957	-1.77953	-	-			-1.12183	1.54453	0.186694	-2.55656					-0.221134	0.142059	0.914145	-0.367355	-	-			-0.393874	1.67661	0.0706533	-2.68927
P12804	Fgl2	Fibroleukin	Fgl2	-0.275256	0.533627	0.790745	-1.17564	-	-			0.439944	1.34263	0.13431	2.42982	-	-			-0.258245	0.370024	0.878196	-0.844024	-	-			0.456959	0.527212	0.625611	1.16378					0.181698	0.161082	0.900938	0.428865	-	-			0.715192	2.24148	0.0274751	3.73641	+
P13597	Icam1	Intercellular adhesion molecule 1	Icam1	-0.582405	1.09929	0.586446	-2.04972	-	-			1.74475	3.72131	0.00549398	6.05221	+	-			-0.474926	0.406558	0.870386	-0.894371	-	-			1.85224	1.77396	0.149204	3.00943					1.26983	0.973148	0.39646	1.85249	-	-			2.32718	5.1747	0	8.5295	+
P14901	Hmox1	Heme oxygenase 1	Hmox1					-	-							-	-		+	0			0	-	-	+		NaN	NaN	NaN	NaN									-	-			NaN	NaN	NaN	NaN
P15307	Rel	Proto-oncogene c-Rel	Rel					-	-			0.473407	1.35255	0.132192	2.53453	-	-			0.0242689	0.0332611	0.993373	0.0964911	-	-			NaN	NaN	NaN	NaN			+		0.497676	0.690043	0.563678	1.5158	-	-			NaN	NaN	NaN	NaN
P17879	Hspa1b	Heat shock 70 kDa protein 1B	Hspa1b	-0.794641	1.64416	0.4728	-2.69024	-	-			-0.354803	0.938998	0.26452	-1.71109	-	-			-0.332794	0.44242	0.852208	-0.949576	-	-			0.107031	0.0951573	0.935546	0.255256					-0.687597	1.00044	0.38419	-1.79649	-	-			0.439845	0.885389	0.27416	1.63554
P18155	Mthfd2	Bifunctional methylenetetrahydrofolate dehydrogenase/cyclohydrolase, mitochondrial	Mthfd2					-	-							-	-			0			0	-	-			NaN	NaN	NaN	NaN									-	-			NaN	NaN	NaN	NaN
P19123	Tnnc1	Troponin C, slow skeletal and cardiac muscles	Tnnc1					-	-							-	-		+	0.310626	0.0856069	0.981311	0.23369	-	-			NaN	NaN	NaN	NaN			+						-	-		+	NaN	NaN	NaN	NaN
P20029	Hspa5	Endoplasmic reticulum chaperone BiP	Hspa5	0.098718	0.242635	0.930109	0.584307	-	-			0.287226	0.933009	0.266759	1.7027	-	-			-0.0139484	0.0194678	0.995977	-0.0561281	-	-			0.174555	0.284888	0.808034	0.666326					0.273277	0.597306	0.620597	1.20699	-	-			0.188527	0.400878	0.602429	0.880721
P21958	Tap1	Antigen peptide transporter 1	Tap1	-0.735192	0.799947	0.690023	-1.57828	-	-			1.44659	2.51299	0.0223059	4.00887	+	-			-0.500563	0.643114	0.762887	-1.27832	-	-			1.68122	2.13562	0.0979545	3.44626	+				0.946029	0.80145	0.493914	1.55752	-	-			2.18177	5.35245	0	8.92935	+
P21981	Tgm2	Protein-glutamine gamma-glutamyltransferase 2	Tgm2	-0.0532935	0.107859	0.964283	-0.286848	-	-			0.468796	1.90423	0.0533519	2.98235	-	-			-0.175033	0.234259	0.926001	-0.564068	-	-			0.347038	0.475591	0.662287	1.00931					0.293762	0.372931	0.77438	0.830879	-	-			0.522067	2.60488	0.01416	3.89831	+
P22366	Myd88	Myeloid differentiation primary response protein MyD88	Myd88	0.254463	0.325984	0.893836	0.754663	-	-			0.427025	1.09093	0.202862	1.93979	-	-			-0.0353087	0.0503676	0.992194	-0.141225	-	-			0.13724	0.144084	0.912956	0.374652					0.391717	0.693398	0.562153	1.38795	-	-			0.17256	0.244907	0.739145	0.588926
P24063	Itgal	Integrin alpha-L	Itgal					-	-							-	-		+	0.506878	0.395708	0.873609	0.875077	-	-			NaN	NaN	NaN	NaN			+						-	-		+	NaN	NaN	NaN	NaN
P24638	Acp2	Lysosomal acid phosphatase	Acp2	-0.147253	0.229124	0.930516	-0.564505	-	-			-0.319164	1.84384	0.0587302	-3.02653	-	-			-0.250992	0.288419	0.909637	-0.678151	-	-			-0.422915	0.367959	0.747454	-0.840141					-0.570156	0.50529	0.684387	-1.10273	-	-			-0.171926	0.429011	0.576768	-0.933849
P25085	Il1rn	Interleukin-1 receptor antagonist protein	Il1rn	-0.463523	1.13742	0.571769	-2.1092	-	-							-	-	+		0			0	-	-		+	0.0245637	0.0247626	0.982559	0.0714824					-0.438971	0.606083	0.614399	-1.24692	-	-			NaN	NaN	NaN	NaN
P25799	Nfkb1	Nuclear factor NF-kappa-B p105 subunit	Nfkb1	0.216875	0.231602	0.928389	0.566369	-	-			0.404344	1.85371	0.0579181	3.04056	-	-			-0.193907	0.465767	0.841462	-0.992761	-	-			-0.00643285	0.00617991	0.991221	-0.0181567					0.210436	0.325019	0.805626	0.752812	-	-			0.187458	0.293931	0.693962	0.683817
P26645	Marcks	Myristoylated alanine-rich C-kinase substrate	Marcks	0.120841	0.0785069	0.971138	0.215688	-	-			-0.527903	0.382581	0.630279	-0.848207	-	-			1.38067	1.27207	0.566758	2.16275	-	-			0.731908	0.598804	0.576309	1.23497					0.852762	0.834514	0.473469	1.57479	-	-			-0.648739	0.411272	0.593975	-0.907276
P27870	Vav1	Proto-oncogene vav	Vav1	0.0876129	0.0525731	0.979423	0.147504	-	-			1.15405	1.67178	0.0759715	2.7273	-	-			0.337658	0.473728	0.838788	1.00618	-	-			1.4041	1.74058	0.15282	2.81962					1.49171	1.7968	0.153247	2.95974	-	-			1.06644	1.53609	0.0891398	2.50778
P28033	Cebpb	CCAAT/enhancer-binding protein beta	Cebpb					-	-							-	-		+	0			0	-	-	+		NaN	NaN	NaN	NaN									-	-			NaN	NaN	NaN	NaN
P28063	Psmb8	Proteasome subunit beta type-8	Psmb8	0.411392	0.957026	0.627435	1.75156	-	-			0.611377	1.63505	0.080352	2.63568	-	-			0.0628569	0.0454096	0.992594	0.127416	-	-			0.262869	0.201106	0.866344	0.496444					0.674234	0.655803	0.580277	1.29783	-	-			0.199998	0.349772	0.646076	0.788761
P28076	Psmb9	Proteasome subunit beta type-9	Psmb9	-1.02916	1.76378	0.481109	-2.85077	-	-			0.828669	1.94289	0.049939	3.03215	-	-			-0.0248869	0.0229441	0.995466	-0.0660277	-	-			1.83295	2.59781	0.0712405	3.99847	+				0.803782	0.957539	0.405967	1.75229	-	-			1.85784	4.53435	0.000285714	6.80818	+
P28301	Lox	Protein-lysine 6-oxidase	Lox					-	-							-	-			0			0	-	-			NaN	NaN	NaN	NaN									-	-			NaN	NaN	NaN	NaN
P28654	Dcn	Decorin	Dcn	-0.135172	0.117923	0.961751	-0.310964	-	-			-0.0391301	0.0343627	0.962721	-0.0977024	-	-			-0.939757	0.826296	0.689931	-1.551	-	-			-0.843717	0.639938	0.550813	-1.28095					-0.978887	0.7331	0.536321	-1.42403	-	-			0.0960664	0.100691	0.885576	0.268791
P28667	Marcksl1	MARCKS-related protein	Marcksl1					-	-							-	-		+	0			0	-	-	+		NaN	NaN	NaN	NaN									-	-			NaN	NaN	NaN	NaN
P29477	Nos2	Nitric oxide synthase, inducible	Nos2					-	-							-	-		+	0			0	-	-	+		NaN	NaN	NaN	NaN									-	-			NaN	NaN	NaN	NaN
P29533	Vcam1	Vascular cell adhesion protein 1	Vcam1					-	-							-	-			0.569436	0.181156	0.951583	0.45829	-	-			NaN	NaN	NaN	NaN			+						-	-			NaN	NaN	NaN	NaN
P31266	Rbpj	Recombining binding protein suppressor of hairless	Rbpj					-	-							-	-			0			0	-	-			NaN	NaN	NaN	NaN									-	-			NaN	NaN	NaN	NaN
P31324	Prkar2b	cAMP-dependent protein kinase type II-beta regulatory subunit	Prkar2b	-0.0785984	0.0960859	0.965139	-0.261115	-	-			-0.173389	0.178194	0.818713	-0.449866	-	-			0.0579459	0.0518428	0.991429	0.145559	-	-			-0.0368451	0.0396433	0.973896	-0.113579					-0.115443	0.151457	0.907393	-0.396326	-	-			-0.0947912	0.0949102	0.890777	-0.255264
P32037	Slc2a3	Solute carrier family 2, facilitated glucose transporter member 3	Slc2a3					-	-							-	-			-1.9242	1.36005	0.527074	-2.54735	-	-			NaN	NaN	NaN	NaN			+						-	-			NaN	NaN	NaN	NaN
P32921	Wars	Tryptophan--tRNA ligase, cytoplasmic	Wars	0.164124	0.300448	0.900365	0.698691	-	-			0.220702	0.60934	0.444781	1.22587	-	-			-0.0148672	0.0267747	0.995264	-0.0765913	-	-			0.0417067	0.0622571	0.95637	0.172146					0.205835	0.395488	0.760669	0.871188	-	-			0.0565783	0.114133	0.873652	0.301178
P35441	Thbs1	Thrombospondin-1	Thbs1	-0.536356	1.76541	0.483017	-3.92586	-	-			1.43051	1.25699	0.154153	2.24104	-	-			-0.0679409	0.0412361	0.991754	-0.116419	-	-			1.89893	1.74071	0.153253	3.06609					1.36257	1.19424	0.308281	2.19781	-	-			1.96687	1.823	0.0543684	3.08374
P35831	Ptpn12	Tyrosine-protein phosphatase non-receptor type 12	Ptpn12					-	-			0.521773	0.458888	0.565835	0.9909	-	-			-0.857009	0.970852	0.639074	-1.79076	-	-			NaN	NaN	NaN	NaN			+		-0.335236	0.271498	0.834921	-0.657619	-	-			NaN	NaN	NaN	NaN
P36371	Tap2	Antigen peptide transporter 2	Tap2	-0.188435	0.18578	0.948111	-0.474443	-	-			1.01952	2.05999	0.0420253	3.33641	+	-			-0.1167	0.141728	0.965477	-0.365653	-	-			1.09126	1.50227	0.195496	2.60327					0.902816	1.32384	0.267415	2.33964	-	-			1.20796	2.20577	0.0290526	3.54894	+
P38647	Hspa9	Stress-70 protein, mitochondrial	Hspa9	-0.406491	1.32212	0.548904	-2.25676	-	-			-0.157094	0.630892	0.431828	-1.25943	-	-			-0.0318789	0.0446833	0.992442	-0.12547	-	-			0.2175	0.319608	0.781681	0.732703					-0.188973	0.307794	0.812626	-0.71035	-	-			0.2494	0.706526	0.367792	1.3748
P39429	Traf2	TNF receptor-associated factor 2	Traf2	0.225225	0.197794	0.943904	0.506306	-	-			0.805965	0.943584	0.261783	1.84948	-	-			0			0	-	-			NaN	NaN	NaN	NaN				+					-	-			0.58078	0.910192	0.262937	1.75345
P40237	Cd82	CD82 antigen	Cd82					-	-							-	-			0			0	-	-			NaN	NaN	NaN	NaN									-	-			NaN	NaN	NaN	NaN
P41216	Acsl1	Long-chain-fatty-acid--CoA ligase 1	Acsl1	-0.179576	0.379751	0.866939	-0.855596	-	-			-0.317755	0.58702	0.458158	-1.20533	-	-			-0.209245	0.208313	0.934079	-0.514951	-	-			-0.347417	0.389587	0.731433	-0.87365					-0.527001	0.565672	0.639975	-1.20981	-	-			-0.138159	0.220484	0.76592	-0.537108
P42225	Stat1	Signal transducer and activator of transcription 1	Stat1	-0.149159	0.160127	0.952308	-0.408343	-	-			1.96678	4.05898	0.004	6.01548	+	-			-0.588197	0.594122	0.773761	-1.19649	-	-			1.52773	1.78616	0.14659	2.83035					1.37858	1.66109	0.179277	2.66926	-	-			2.11592	3.94547	0.00164706	5.83477	+
P42230	Stat5a	Signal transducer and activator of transcription 5A	Stat5a					-	-							-	-			0			0	-	-			NaN	NaN	NaN	NaN									-	-			NaN	NaN	NaN	NaN
P43346	Dck	Deoxycytidine kinase	Dck	0.256078	0.2568	0.924448	0.63457	-	-			0.280332	0.251869	0.747952	0.616964	-	-			0			0	-	-			NaN	NaN	NaN	NaN				+					-	-			0.0242701	0.0206903	0.970407	0.0604645
P43406	Itgav	Integrin alpha-V	Itgav	-0.0289872	0.0868913	0.967509	-0.235373	-	-			-0.0317695	0.0891909	0.902833	-0.240526	-	-			-0.464082	1.13079	0.605598	-1.97422	-	-			-0.466849	1.06705	0.331351	-1.90654					-0.495852	1.05214	0.360434	-1.8857	-	-			-0.00276134	0.00960522	0.985394	-0.0280484
P47791	Gsr	Glutathione reductase, mitochondrial	Gsr	0.0351702	0.0538917	0.978738	0.150581	-	-			-0.438885	1.247	0.155857	-2.12955	-	-			0.109313	0.160593	0.95869	0.408302	-	-			-0.364733	0.602305	0.573498	-1.22164					-0.329572	0.541545	0.660349	-1.12373	-	-			-0.474062	1.32455	0.127328	-2.23196
P48025	Syk	Tyrosine-protein kinase SYK	Syk	-0.598819	0.73078	0.713583	-1.49368	-	-			0.331337	0.626311	0.434741	1.26857	-	-			0.285519	0.478871	0.836553	1.02529	-	-			1.21565	1.55027	0.187702	2.87705					0.616857	1.49307	0.22171	2.77682	-	-			0.930171	1.48691	0.0960081	2.52332
P48722	Hspa4l	Heat shock 70 kDa protein 4L	Hspa4l	-0.123391	0.172736	0.952372	-0.436372	-	-			-0.13112	0.187676	0.808339	-0.467713	-	-			0.117331	0.166567	0.957385	0.421585	-	-			0.109616	0.152403	0.907659	0.390943					-0.0137892	0.0165898	0.986185	-0.0481806	-	-			-0.00771436	0.00959479	0.985222	-0.0280183
P49710	Hcls1	Hematopoietic lineage cell-specific protein	Hcls1	-0.548934	0.73943	0.710007	-1.48079	-	-			1.28655	2.68644	0.0186273	4.12561	+	-			-0.00557232	0.00634318	0.999835	-0.0185908	-	-			1.82988	3.0192	0.0566154	5.07693	+				1.28097	2.15366	0.108608	3.47259	+	-			1.83547	3.81297	0.00285714	6.2269	+
P49817	Cav1	Caveolin-1	Cav1	-0.322933	0.371709	0.871762	-0.831865	-	-			-0.114288	0.198558	0.796387	-0.491029	-	-			-0.468499	0.61026	0.766028	-1.22158	-	-			-0.259893	0.213743	0.855768	-0.523064					-0.582786	0.857558	0.462203	-1.5959	-	-			0.208607	0.207242	0.777692	0.509418
P50396	Gdi1	Rab GDP dissociation inhibitor alpha	Gdi1	-0.024704	0.0365969	0.981307	-0.104052	-	-			0.0349175	0.0596517	0.93832	0.165358	-	-			-0.533595	1.52573	0.478086	-2.49436	-	-			-0.473967	1.11428	0.318294	-1.9722					-0.498678	1.90022	0.137657	-3.03437	-	-			0.0596095	0.0827379	0.903239	0.224431
P50637	Tspo	Translocator protein	Tspo					-	-							-	-			0.157149	0.0936048	0.975205	0.253719	-	-			0.375425	0.228342	0.844766	0.567287									-	-			0.218267	0.199315	0.786043	0.497896
P51437	Camp	Cathelicidin antimicrobial peptide	Camp					-	-							-	-			0.947323	0.616764	0.764673	1.27895	-	-			NaN	NaN	NaN	NaN			+						-	-			NaN	NaN	NaN	NaN
P53690	Mmp14	Matrix metalloproteinase-14	Mmp14					-	-							-	-			-0.512273	0.979813	0.65312	-1.86294	-	-			0.754333	1.40324	0.221896	3.0109									-	-			1.2666	2.8359	0.0101239	5.06257	+
P55041	Gem	GTP-binding protein GEM	Gem					-	-							-	-			0			0	-	-			NaN	NaN	NaN	NaN									-	-			NaN	NaN	NaN	NaN
P56375	Acyp2	Acylphosphatase-2	Acyp2	0.600096	0.524648	0.793552	1.15904	-	-			-0.126779	0.117264	0.869403	-0.311516	-	-			-0.40497	0.291841	0.906928	-0.692913	-	-			-1.13183	0.632606	0.55472	-1.40391					-0.531749	0.310083	0.812533	-0.745183	-	-			-0.726884	0.84525	0.293423	-1.65059
P56528	Cd38	ADP-ribosyl cyclase/cyclic ADP-ribose hydrolase 1	Cd38	0.185306	0.246335	0.930411	0.596855	-	-			0.0377484	0.0280096	0.968793	0.0805775	-	-			0.152458	0.0878682	0.979851	0.238507	-	-			0.00489171	0.00290487	0.993119	0.00861974					0.190207	0.0979975	0.934331	0.267558	-	-			-0.147576	0.151457	0.833329	-0.387785
P57016	Lad1	Ladinin-1	Lad1	-0.246521	0.820324	0.68644	-1.55397	-	-			-0.639961	2.30307	0.0298071	-3.49928	-	+			0.144034	0.183417	0.950033	0.457455	-	-			-0.249417	0.339524	0.770321	-0.769874					-0.495928	0.904406	0.440202	-1.66246	-	-			-0.39346	0.981265	0.232835	-1.76996
P58069	Rasa2	Ras GTPase-activating protein 2	Rasa2					-	-			-0.0925749	0.0749728	0.921624	-0.208887	-	-			-0.0591165	0.0365074	0.992046	-0.105556	-	-			NaN	NaN	NaN	NaN			+		-0.151691	0.11418	0.928814	-0.314573	-	-			NaN	NaN	NaN	NaN
P62915	Gtf2b	Transcription initiation factor IIB	Gtf2b	-0.710105	0.781148	0.691398	-1.54812	-	-			-0.0689646	0.189008	0.807575	-0.473501	-	-			0.306817	0.847564	0.687351	1.6286	-	-			0.947973	0.87094	0.415496	1.72866					0.237852	0.440124	0.725911	1.00055	-	-			0.64114	1.04953	0.205451	1.88205
P63300	Selenow	Selenoprotein W	Selenow					-	-							-	-			0			0	-	-			NaN	NaN	NaN	NaN									-	-			NaN	NaN	NaN	NaN
P70122	Sbds	Ribosome maturation protein SBDS	Sbds	-0.420261	0.984121	0.617	-1.79002	-	-			-0.073107	0.138231	0.85469	-0.357623	-	-			0.036702	0.0359462	0.992147	0.102557	-	-			0.383901	0.434716	0.690753	0.955039					-0.0364051	0.0393334	0.970592	-0.112222	-	-			0.347179	0.651829	0.401745	1.29173
P70380	Il18	Interleukin-18	Il18	-0.34986	0.322495	0.894459	-0.753209	-	-			-1.20834	1.17516	0.176989	-2.16805	-	-			0			0	-	-			NaN	NaN	NaN	NaN				+					-	-			-0.85848	0.850437	0.290426	-1.633
P70460	Vasp	Vasodilator-stimulated phosphoprotein	Vasp	0.162745	0.389616	0.859933	0.864178	-	-			0.029351	0.0775338	0.918198	0.211322	-	-			-0.275202	0.52516	0.803486	-1.08691	-	-			-0.408619	0.716666	0.50227	-1.39					-0.245851	0.368928	0.774387	-0.823653	-	-			-0.133405	0.491052	0.523516	-1.03517
P82198	Tgfbi	Transforming growth factor-beta-induced protein ig-h3	Tgfbi	-0.43675	1.4727	0.50484	-2.46003	-	-			0.404051	1.32865	0.137565	2.23735	-	-			-0.788689	1.43729	0.513452	-2.35267	-	-			0.0521188	0.0524268	0.963189	0.146361					-0.384638	0.565813	0.640135	-1.15705	-	-			0.840819	2.53264	0.0162324	3.80196	+
P97360	Etv6	Transcription factor ETV6	Etv6	0.234022	0.195401	0.942734	0.492146	-	-			0.924324	1.68886	0.0744593	2.80718	-	-			-0.0680153	0.138298	0.966837	-0.359819	-	-			0.622335	0.941994	0.38795	1.80355					0.856308	0.903874	0.439943	1.78348	-	-			0.690317	1.8567	0.0512182	2.97572
P97364	Sephs2	Selenide, water dikinase 2	Sephs2	-0.2449	0.140949	0.959776	-0.367395	-	-			-1.30058	0.70264	0.38481	-1.48247	-	-			0			0	-	-			NaN	NaN	NaN	NaN				+					-	-			-1.05565	0.569701	0.461732	-1.19954
P97372	Psme2	Proteasome activator complex subunit 2	Psme2	-0.592799	1.4205	0.514154	-2.38975	-	-			0.289071	1.0258	0.227915	1.83141	-	-			-0.0898514	0.197972	0.941615	-0.489781	-	-			0.792034	1.8406	0.136448	2.95405					0.199219	0.466625	0.712107	0.99871	-	-			0.88189	2.5815	0.0147267	3.86706	+
P97430	Slpi	Antileukoproteinase	Slpi					-	-							-	-			1.23233	1.1875	0.591782	2.18729	-	-			NaN	NaN	NaN	NaN			+						-	-			NaN	NaN	NaN	NaN
P97864	Casp7	Caspase-7	Casp7	0.207737	0.316773	0.893321	0.7299	-	-			-0.0980361	0.112881	0.875012	-0.29819	-	-			0.144973	0.143303	0.966791	0.368461	-	-			-0.160793	0.168041	0.892548	-0.424848					0.0469374	0.0407609	0.969327	0.115133	-	-			-0.305764	0.498739	0.516004	-1.04794
P98078	Dab2	Disabled homolog 2	Dab2	0.558069	0.996243	0.613225	1.80716	-	-			1.04418	2.42992	0.0248541	3.66591	+	-			-0.427516	0.833844	0.687113	-1.56188	-	-			0.0586166	0.0719488	0.950485	0.197586					0.61666	0.957717	0.406181	1.75255	-	-			0.486124	1.26579	0.142455	2.15444
P99029	Prdx5	Peroxiredoxin-5, mitochondrial	Prdx5	-0.105501	0.220539	0.936348	-0.5388	-	-			-0.323321	0.579135	0.463781	-1.17827	-	-			-0.732086	1.00188	0.647307	-1.79848	-	-			-0.949867	1.49555	0.197051	-2.49076					-1.05541	1.75624	0.160512	-2.84064	-	-			-0.217805	0.335687	0.658451	-0.76276
Q00651	Itga4	Integrin alpha-4	Itga4					-	-	+		0.149922	0.247621	0.751109	0.60315	-	-			-0.101375	0.0693484	0.989511	-0.192145	-	-			NaN	NaN	NaN	NaN			+		0.0485473	0.0221055	0.985358	0.0654211	-	-			NaN	NaN	NaN	NaN
Q00993	Axl	Tyrosine-protein kinase receptor UFO	Axl					-	-							-	-			0			0	-	-			NaN	NaN	NaN	NaN									-	-			NaN	NaN	NaN	NaN
Q03963	Eif2ak2	Interferon-induced, double-stranded RNA-activated protein kinase	Eif2ak2	-0.205513	0.109978	0.963672	-0.293939	-	-			-0.222244	0.137781	0.854811	-0.357501	-	-			-0.220734	0.170487	0.956876	-0.431407	-	-			-0.23746	0.16777	0.892492	-0.428539					-0.442978	0.253289	0.842153	-0.611091	-	-			-0.0167375	0.0117837	0.982424	-0.0344043
Q04207	Rela	Transcription factor p65	Rela	-0.431482	1.41704	0.510946	-2.42526	-	-			0.288788	0.521545	0.507591	1.09085	-	-			0.460481	0.781551	0.712934	1.486	-	-			1.18073	2.88487	0.06	4.41532	+				0.749269	1.48701	0.222744	2.52346	-	-			0.720238	1.9311	0.0452521	3.01696
Q04750	Top1	DNA topoisomerase 1	Top1	-0.159148	0.44389	0.837791	-0.964824	-	-			0.332253	3.24199	0.00980822	4.95671	+	-			-0.321224	1.31362	0.550099	-2.19499	-	-			0.170171	0.381636	0.737927	0.846514					0.0110289	0.0217222	0.985252	0.0627358	-	-			0.491385	2.37213	0.0214677	3.58983	+
Q05117	Acp5	Tartrate-resistant acid phosphatase type 5	Acp5	0.525343	0.481964	0.821365	1.03797	-	-			0.827642	1.06257	0.213944	1.95305	-	-			0.0470015	0.0312685	0.993869	0.0903599	-	-			0.3493	0.23171	0.842626	0.569951					0.874643	0.718426	0.546078	1.51078	-	-			0.302266	0.293604	0.693806	0.685475
Q05144	Rac2	Ras-related C3 botulinum toxin substrate 2	Rac2	-0.105146	0.163772	0.953023	-0.416493	-	-			0.562072	2.32203	0.0289688	3.5241	+	-			-0.248373	0.622193	0.76415	-1.24	-	-			0.418838	0.805911	0.449437	1.5215					0.313699	0.827483	0.478442	1.55272	-	-			0.667195	1.69646	0.0684929	2.71485
Q05769	Ptgs2	Prostaglandin G/H synthase 2	Ptgs2					-	-							-	-		+	0			0	-	-	+		NaN	NaN	NaN	NaN									-	-			NaN	NaN	NaN	NaN
Q05915	Gch1	GTP cyclohydrolase 1	Gch1	1.17311	1.17038	0.578437	2.32597	-	-			1.87614	2.62517	0.0193378	4.6397	+	-			-0.22678	0.354331	0.885767	-0.814372	-	-			0.47625	0.662748	0.534795	1.41075					1.64936	1.55844	0.203542	3.38563	-	-			0.70305	1.27652	0.139814	2.26984
Q06180	Ptpn2	Tyrosine-protein phosphatase non-receptor type 2	Ptpn2					-	-							-	-			0			0	-	-			NaN	NaN	NaN	NaN									-	-			NaN	NaN	NaN	NaN
Q09014	Ncf1	Neutrophil cytosol factor 1	Ncf1					-	-							-	-			-0.496493	0.502847	0.818246	-1.0598	-	-			NaN	NaN	NaN	NaN			+						-	-			NaN	NaN	NaN	NaN
Q09199	B4galnt2	Beta-1,4 N-acetylgalactosaminyltransferase 2	B4galnt2	0.121049	0.144339	0.957759	0.372582	-	-			-0.0579999	0.0722613	0.924103	-0.19792	-	-			0.411174	0.443563	0.852432	0.951523	-	-			0.232141	0.198351	0.868397	0.490587					0.353174	0.367773	0.773756	0.821564	-	-			-0.17906	0.205851	0.778763	-0.506486
Q0VGB7	Ppp4r2	Serine/threonine-protein phosphatase 4 regulatory subunit 2	Ppp4r2					-	-			0.128886	0.0945386	0.897099	0.257255	-	-			0.932691	0.864333	0.683148	1.71765	-	-			NaN	NaN	NaN	NaN			+		1.06158	1.00196	0.382746	2.01859	-	-			NaN	NaN	NaN	NaN
Q2TBA3	Malt1	Mucosa-associated lymphoid tissue lymphoma translocation protein 1 homolog	Malt1					-	-							-	-			0			0	-	-			NaN	NaN	NaN	NaN									-	-			NaN	NaN	NaN	NaN
Q3THS6	Mat2a	S-adenosylmethionine synthase isoform type-2	Mat2a	0.453703	1.65223	0.474112	2.70107	-	-			-0.228566	0.796513	0.332371	-1.50784	-	-			0.241001	0.548823	0.796214	1.12496	-	-			-0.441279	1.06151	0.333615	-1.88029					0.0124344	0.0157226	0.9859	0.0456019	-	-			-0.68225	6.63086	0	-11.2078		+
Q3TJD7	Pdlim7	PDZ and LIM domain protein 7	Pdlim7	-0.595585	0.575642	0.786331	-1.17902	-	-			-0.364734	0.479114	0.545674	-1.01523	-	-			-0.0967933	0.0688665	0.989867	-0.188856	-	-			0.134043	0.0781185	0.946059	0.2128					-0.461527	0.39058	0.763551	-0.862475	-	-			0.230815	0.189494	0.79521	0.471632
Q3TKY6	Cwc27	Spliceosome-associated protein CWC27 homolog	Cwc27	0.0330728	0.0469096	0.980414	0.13342	-	-			0.164779	0.426763	0.593923	0.940858	-	-			-0.0014772	0.00318208	1	-0.00943933	-	-			0.130233	0.227129	0.844838	0.560295					0.163301	0.487883	0.698	1.12064	-	-			0.131691	0.320248	0.671908	0.733907
Q3TN34	Micall2	MICAL-like protein 2	Micall2	0.376391	0.181289	0.949117	0.469107	-	-			-0.444849	0.337471	0.670608	-0.772261	-	-			-0.292053	0.141922	0.965343	-0.368198	-	-			-1.11328	0.402421	0.718869	-0.928222					-0.736902	0.27827	0.832853	-0.671489	-	-			-0.821248	0.724954	0.35799	-1.43797
Q3TVI8	Pbxip1	Pre-B-cell leukemia transcription factor-interacting protein 1	Pbxip1	-0.329071	0.419326	0.843504	-0.916893	-	-			-0.708705	1.19369	0.171527	-2.0586	-	-			-0.36336	0.332521	0.893048	-0.756874	-	-			-0.742967	0.75239	0.480892	-1.45307					-1.07207	1.20399	0.30287	-2.09578	-	-			-0.379638	0.53269	0.489036	-1.10366
Q3U5Q7	Cmpk2	UMP-CMP kinase 2, mitochondrial	Cmpk2	-0.469852	0.587929	0.783094	-1.23045	-	-			0.0891314	0.17659	0.819134	0.446334	-	-			-0.803864	1.3624	0.527338	-2.31131	-	-			-0.24488	0.198256	0.868334	-0.49561					-0.714733	0.67488	0.573805	-1.3754	-	-			0.558997	1.42064	0.107515	2.38993
Q3UW53	Fam129a	Protein Niban	Fam129a	-0.14822	0.403349	0.852915	-0.88868	-	-			-0.127023	0.29773	0.704059	-0.691121	-	-			-0.36271	1.04429	0.628366	-1.84204	-	-			-0.341507	1.01157	0.353054	-1.81184					-0.489733	1.25454	0.290462	-2.13954	-	-			0.021207	0.05878	0.928092	0.163079
Q3UZA1	Rcsd1	CapZ-interacting protein	Rcsd1	-0.792745	0.279037	0.910484	-0.673054	-	-			-0.730214	0.230946	0.766162	-0.565001	-	-			0.641223	0.206958	0.934554	0.514324	-	-			0.703747	0.262321	0.824463	0.638697					-0.0889918	0.0207594	0.985068	-0.0622847	-	-			0.0625232	0.0215318	0.970215	0.0621987
Q4VBD2	Tapt1	Transmembrane anterior posterior transformation protein 1	Tapt1					-	-	+		0.478671	0.467843	0.557101	1.05303	-	-			0			0	-	-	+		NaN	NaN	NaN	NaN									-	-	+		NaN	NaN	NaN	NaN
Q5EBG6	Hspb6	Heat shock protein beta-6	Hspb6	0.117557	0.220052	0.935251	0.537784	-	-			-0.431819	0.972243	0.24929	-1.75744	-	-			-0.539362	0.954197	0.652068	-1.71984	-	-			-1.08871	2.31136	0.0837333	-3.51013		+			-0.971182	1.96602	0.130943	-3.06197	-	-			-0.549371	1.39332	0.112416	-2.32211
Q5RKZ7	Mocs1	Molybdenum cofactor biosynthesis protein 1	Mocs1					-	-			-0.408338	0.288031	0.711368	-0.691348	-	-			0.194911	0.0981059	0.976159	0.267829	-	-			NaN	NaN	NaN	NaN			+		-0.213428	0.110219	0.928123	-0.304607	-	-			NaN	NaN	NaN	NaN
Q5SUA5	Myo1g	Unconventional myosin-Ig	Myo1g	-0.388248	0.368723	0.874546	-0.862496	-	-			0.970574	1.74358	0.0690611	2.88442	-	-			-0.465136	0.451137	0.846654	-0.964386	-	-			0.893686	0.593928	0.578298	1.22694					0.505438	0.333943	0.800469	0.765619	-	-			1.35883	2.70634	0.0118935	4.51363	+
Q60590	Orm1	Alpha-1-acid glycoprotein 1	Orm1					-	-							-	-			0			0	-	-			NaN	NaN	NaN	NaN									-	-			NaN	NaN	NaN	NaN
Q60710	Samhd1	Deoxynucleoside triphosphate triphosphohydrolase SAMHD1	Samhd1	-0.300085	1.01602	0.604236	-1.83504	-	-			0.976334	3.09307	0.012	4.56718	+	-			-0.102454	0.17556	0.954255	-0.44039	-	-			1.17396	3.9293	0.0465	5.80928	+				0.87388	2.60547	0.0905846	3.89909	+	-			1.27644	4.47088	0.000242424	6.69879	+
Q60715	P4ha1	Prolyl 4-hydroxylase subunit alpha-1	P4ha1	1.09212	0.559395	0.793366	1.22305	-	-			1.55601	1.08251	0.205811	2.02355	-	-			-0.336513	0.288119	0.909911	-0.681013	-	-			0.127376	0.0890315	0.940435	0.244967					1.2195	0.739365	0.532229	1.54827	-	-			0.463892	0.358422	0.637647	0.816027
Q60766	Irgm1	Immunity-related GTPase family M protein 1	Irgm1	0.722828	1.51716	0.519714	2.56578	-	-			1.29681	2.95314	0.0145833	4.51673	+	-			0.0160292	0.019992	0.99621	0.057847	-	-			0.590003	1.2491	0.270384	2.1889					1.31284	2.51057	0.0957436	4.17844	+	-			0.573983	1.3765	0.115611	2.3001
Q60778	Nfkbib	NF-kappa-B inhibitor beta	Nfkbib					-	-							-	-		+	0			0	-	-	+		NaN	NaN	NaN	NaN									-	-			NaN	NaN	NaN	NaN
Q60780	Gas7	Growth arrest-specific protein 7	Gas7					-	-							-	-			0.235636	0.150486	0.963934	0.391385	-	-			NaN	NaN	NaN	NaN			+						-	-			NaN	NaN	NaN	NaN
Q60787	Lcp2	Lymphocyte cytosolic protein 2	Lcp2					-	-							-	-		+	-0.248491	0.162231	0.959063	-0.414396	-	-			NaN	NaN	NaN	NaN			+						-	-		+	NaN	NaN	NaN	NaN
Q60864	Stip1	Stress-induced-phosphoprotein 1	Stip1	0.354278	1.75441	0.47977	2.83818	-	-			0.422013	2.85327	0.0162545	4.23443	+	-			0.0179086	0.0425939	0.991417	0.119857	-	-			0.0856504	0.20175	0.865824	0.49781					0.439922	1.55058	0.20397	2.52654	-	-			0.0677508	0.305299	0.684356	0.705599
Q60963	Pla2g7	Platelet-activating factor acetylhydrolase	Pla2g7					-	-							-	-		+	0			0	-	-	+		NaN	NaN	NaN	NaN									-	-			NaN	NaN	NaN	NaN
Q60974	Ncor1	Nuclear receptor corepressor 1	Ncor1	0.613916	0.745083	0.71159	1.51784	-	-			0.227368	0.523094	0.507206	1.10851	-	-			0.0715157	0.133603	0.96728	0.352016	-	-			-0.315033	0.288345	0.807573	-0.700575					0.298884	0.382334	0.770034	0.889177	-	-			-0.38655	0.670109	0.390083	-1.35073
Q61024	Asns	Asparagine synthetase [glutamine-hydrolyzing]	Asns	-0.077903	0.0970219	0.964824	-0.262198	-	-			1.19603	3.75964	0.00503896	6.12487	+	-			-0.331668	0.583288	0.77765	-1.17953	-	-			0.942245	1.73146	0.153115	2.75992					0.864365	1.48666	0.222645	2.52297	-	-			1.27392	3.38059	0.00438806	4.97869	+
Q61093	Cybb	Cytochrome b-245 heavy chain	Cybb					-	-			1.47369	2.10032	0.039924	3.51207	+	-			-0.354254	0.392874	0.875379	-0.874275	-	-			NaN	NaN	NaN	NaN			+		1.11943	1.44761	0.229545	2.85349	-	-			NaN	NaN	NaN	NaN
Q61147	Cp	Ceruloplasmin	Cp	0.36621	0.659937	0.744597	1.31209	-	-			2.17214	4.44915	0.00296774	6.66161	+	-			-0.535184	0.414215	0.865002	-0.901054	-	-			1.27072	1.20321	0.285708	2.07131					1.63695	1.66424	0.178886	2.67333	-	-			1.80595	3.73137	0.00331034	5.5022	+
Q61235	Sntb2	Beta-2-syntrophin	Sntb2	-0.129412	0.222842	0.935518	-0.543594	-	-			0.452921	1.02177	0.228629	1.82588	-	-			-0.600344	1.42015	0.507529	-2.38927	-	-			-0.0179834	0.0265657	0.981296	-0.0765406					-0.147423	0.260781	0.840464	-0.623304	-	-			0.582331	1.42027	0.107538	2.35729
Q61271	Acvr1b	Activin receptor type-1B	Acvr1b					-	-							-	-			0			0	-	-			NaN	NaN	NaN	NaN				+					-	-			NaN	NaN	NaN	NaN
Q61333	Tnfaip2	Tumor necrosis factor alpha-induced protein 2	Tnfaip2					-	-							-	-		+	0			0	-	-	+		NaN	NaN	NaN	NaN									-	-			NaN	NaN	NaN	NaN
Q61510	Trim25	E3 ubiquitin/ISG15 ligase TRIM25	Trim25	-0.0251239	0.0403957	0.980165	-0.114727	-	-			0.297006	0.956687	0.255209	1.75108	-	-			-0.683874	1.52764	0.477942	-2.53387	-	-			-0.361746	0.548372	0.60863	-1.14207					-0.386868	0.516035	0.678629	-1.0965	-	-			0.322133	1.24818	0.145894	2.13111
Q61553	Fscn1	Fascin	Fscn1	-0.505761	0.588665	0.78439	-1.19991	-	-			0.750066	2.63638	0.0192388	3.9405	+	-			-0.418741	0.79864	0.706935	-1.50184	-	-			0.83709	1.03649	0.345577	1.84609					0.331326	0.47897	0.70467	1.01499	-	-			1.25583	2.23802	0.0276494	3.41434	+
Q61635	Ifi47	GTP-binding protein	Ifi47					-	-							-	-			-0.31758	0.347863	0.888077	-0.788153	-	-			NaN	NaN	NaN	NaN			+						-	-			NaN	NaN	NaN	NaN
Q61646	Hp	Haptoglobin	Hp					-	-							-	-		+	0.513531	0.269692	0.91358	0.634898	-	-			NaN	NaN	NaN	NaN			+						-	-		+	NaN	NaN	NaN	NaN
Q61712	Dnajc1	DnaJ homolog subfamily C member 1	Dnajc1					-	-							-	-			0			0	-	-			NaN	NaN	NaN	NaN									-	-			NaN	NaN	NaN	NaN
Q62011	Pdpn	Podoplanin	Pdpn					-	-			0.867807	1.43362	0.114056	2.50168	-	-			0.210606	0.146047	0.96534	0.379183	-	-			NaN	NaN	NaN	NaN			+		1.07841	0.879309	0.45663	1.7426	-	-			NaN	NaN	NaN	NaN
Q62059	Vcan	Versican core protein	Vcan	0.357413	0.694475	0.726547	1.38966	-	-			0.837228	2.94664	0.014715	4.50705	+	-			0.257868	0.377395	0.880174	0.836209	-	-			0.737708	1.07596	0.329327	1.91895					1.0951	1.94066	0.134588	3.08897	-	-			0.479836	1.1464	0.17528	2.0166
Q62191	Trim21	E3 ubiquitin-protein ligase TRIM21	Trim21					-	-							-	-			0			0	-	-			NaN	NaN	NaN	NaN									-	-			NaN	NaN	NaN	NaN
Q63850	Nup62	Nuclear pore glycoprotein p62	Nup62	0.654176	0.568464	0.789795	1.1751	-	-			0.660218	0.817879	0.321735	1.55037	-	-			-0.829282	1.3788	0.512674	-2.37156	-	-			-0.823192	0.825229	0.439525	-1.59426					-0.169064	0.0993133	0.933946	-0.269136	-	-			0.00608303	0.00598544	0.989748	0.0175494
Q64112	Ifit2	Interferon-induced protein with tetratricopeptide repeats 2	Ifit2					-	-							-	-		+	0			0	-	-	+		NaN	NaN	NaN	NaN									-	-			NaN	NaN	NaN	NaN
Q64282	Ifit1	Interferon-induced protein with tetratricopeptide repeats 1	Ifit1					-	-							-	-		+	0			0	-	-	+		NaN	NaN	NaN	NaN									-	-			NaN	NaN	NaN	NaN
Q64310	Surf4	Surfeit locus protein 4	Surf4					-	-			0.707597	0.423322	0.595475	0.934702	-	-			0			0	-	-			NaN	NaN	NaN	NaN									-	-			NaN	NaN	NaN	NaN
Q64321	Zbtb7b	Zinc finger and BTB domain-containing protein 7B	Zbtb7b	0.695608	1.05785	0.597481	2.25121	-	-			0.633601	1.30523	0.142559	2.57856	-	-			0			0	-	-			NaN	NaN	NaN	NaN				+					-	-			-0.0619995	0.200091	0.785299	-0.511433
Q64455	Ptprj	Receptor-type tyrosine-protein phosphatase eta	Ptprj					-	-							-	-			0			0	-	-			NaN	NaN	NaN	NaN									-	-			NaN	NaN	NaN	NaN
Q64471	Gstt1	Glutathione S-transferase theta-1	Gstt1	0.694845	1.16844	0.577342	2.04697	-	-			0.0831299	0.0746299	0.922006	0.203956	-	-			-0.670663	0.58241	0.777306	-1.17815	-	-			-1.28235	1.36731	0.232504	-2.28808					-0.587533	0.44835	0.722951	-0.963158	-	-			-0.611683	1.04682	0.206278	-1.86023
Q64521	Gpd2	Glycerol-3-phosphate dehydrogenase, mitochondrial	Gpd2	0.282779	0.362901	0.876747	0.815811	-	-			0.30291	0.425629	0.5943	0.924035	-	-			0.0184007	0.0420482	0.99095	0.118387	-	-			0.0385312	0.0957876	0.936234	0.256804					0.321311	0.453355	0.719878	0.971699	-	-			0.0201168	0.050049	0.9368	0.140052
Q6DIB4	Nol4l	Nucleolar protein 4-like	Nol4l					-	-							-	-			0			0	-	-			NaN	NaN	NaN	NaN									-	-			NaN	NaN	NaN	NaN
Q6EDY6	Carmil1	F-actin-uncapping protein LRRC16A	Carmil1	0.101961	0.102546	0.963553	0.277132	-	-			-0.128397	0.143308	0.849537	-0.37286	-	-			0.22785	0.35989	0.882472	0.824912	-	-			-0.00245921	0.00290501	0.993355	-0.00870947					0.0994525	0.0890339	0.938456	0.247121	-	-			-0.230343	0.3817	0.617811	-0.85403
Q6PDH0	Phldb1	Pleckstrin homology-like domain family B member 1	Phldb1	-0.221521	1.39712	0.511918	-2.44777	-	-			-0.327145	2.09434	0.0402113	-3.50267	-	+			-0.44544	1.31133	0.550417	-2.3212	-	-			-0.551058	1.69654	0.1598	-2.89282					-0.772585	1.83712	0.147556	-3.39695	-	-			-0.105633	0.57144	0.460573	-1.17226
Q6Q899	Ddx58	Probable ATP-dependent RNA helicase DDX58	Ddx58	-0.41159	0.391514	0.85985	-0.877172	-	-			0.291367	0.553118	0.48475	1.1499	-	-			-0.297461	0.396822	0.874642	-0.881393	-	-			0.405475	0.332452	0.774608	0.767018					-0.00609398	0.00539373	0.991148	-0.0161253	-	-			0.702957	1.04046	0.208251	1.85152
Q6ZPF4	Fmnl3	Formin-like protein 3	Fmnl3					-	-			1.0181	0.680453	0.39755	1.40823	-	-			0			0	-	-			NaN	NaN	NaN	NaN									-	-			NaN	NaN	NaN	NaN
Q6ZQ58	Larp1	La-related protein 1	Larp1	-0.102306	0.133793	0.962498	-0.348261	-	-			-0.0780538	0.109933	0.878151	-0.291132	-	-			-0.483314	0.940136	0.658841	-1.70052	-	-			-0.459079	0.776308	0.462063	-1.47832					-0.561367	0.811928	0.486469	-1.53023	-	-			0.0242354	0.0470127	0.940037	0.131955
Q6ZQL4	Wdr43	WD repeat-containing protein 43	Wdr43	-0.119466	0.183111	0.949774	-0.465106	-	-			0.352316	0.653768	0.415921	1.31218	-	-			-0.306219	0.351979	0.885928	-0.799383	-	-			0.165555	0.151932	0.907816	0.394714					0.0460973	0.0330532	0.975588	0.0959087	-	-			0.471794	1.13759	0.177188	2.00444
Q78YZ6	Scoc	Short coiled-coil protein	Scoc					-	-							-	-			0			0	-	-			NaN	NaN	NaN	NaN				+					-	-			-0.779501	0.538784	0.484849	-1.1624
Q793I8	Tifa	TRAF-interacting protein with FHA domain-containing protein A	Tifa					-	-							-	-			0			0	-	-			NaN	NaN	NaN	NaN									-	-			NaN	NaN	NaN	NaN
Q7TSF4	Lrrc75a	Leucine-rich repeat-containing protein 75A	Lrrc75a					-	-							-	-			0			0	-	-			NaN	NaN	NaN	NaN				+					-	-			-0.739125	0.344818	0.651458	-0.804039
Q80TM9	Nisch	Nischarin	Nisch	-0.0422486	0.0569576	0.976693	-0.162753	-	-			0.0903136	0.235433	0.760683	0.582374	-	-			-0.051384	0.0655872	0.991411	-0.183205	-	-			0.0811496	0.0820721	0.942395	0.22721					0.0389296	0.0325299	0.97555	0.0952265	-	-			0.13252	0.378951	0.618801	0.860755
Q80UW5	Cdc42bpg	Serine/threonine-protein kinase MRCK gamma	Cdc42bpg	0.50958	0.657515	0.746097	1.34675	-	-			-0.0493042	0.0665497	0.929707	-0.184217	-	-			0.363859	0.580429	0.777821	1.20464	-	-			-0.195033	0.174623	0.885241	-0.449394					0.314555	1.0209	0.374038	2.05281	-	-			-0.558871	0.851737	0.289971	-1.59996
Q80WJ7	Mtdh	Protein LYRIC	Mtdh	-0.277135	0.678645	0.735484	-1.341	-	-			0.232486	0.935759	0.265218	1.70655	-	-			-0.164749	0.369065	0.877795	-0.821286	-	-			0.344881	0.691502	0.517759	1.35216					0.0677364	0.118045	0.926115	0.31048	-	-			0.509624	1.67365	0.071183	2.68545
Q80WT5	Aftph	Aftiphilin	Aftph	-0.1144	0.192564	0.943487	-0.485938	-	-			-0.223255	0.459164	0.565662	-0.985965	-	-			0.0658275	0.0589364	0.991311	0.164918	-	-			-0.043042	0.0282795	0.980109	-0.0831496					-0.157427	0.155457	0.90606	-0.400732	-	-			-0.10885	0.170168	0.814329	-0.43621
Q80X90	Flnb	Filamin-B	Flnb	-0.193367	0.977496	0.621581	-1.78064	-	-			-0.142235	0.754883	0.356135	-1.44681	-	-			0.180199	0.543863	0.795115	1.11703	-	-			0.231324	0.665668	0.533289	1.31292					0.0379646	0.0821724	0.940681	0.223012	-	-			0.0511381	0.189754	0.795517	0.472191
Q810U5	Ccdc50	Coiled-coil domain-containing protein 50	Ccdc50					-	-			-0.483063	0.186863	0.809249	-0.476858	-	-			0			0	-	-			NaN	NaN	NaN	NaN									-	-			NaN	NaN	NaN	NaN
Q8BG95	Ppp1r12b	Protein phosphatase 1 regulatory subunit 12B	Ppp1r12b	0.483714	0.543298	0.790667	1.1266	-	-			-0.378791	1.04168	0.22264	-1.85319	-	-			-0.155746	0.457999	0.845345	-0.979599	-	-			-1.01825	1.50862	0.194623	-2.50833					-0.534537	1.4275	0.2359	-2.39918	-	-			-0.862524	1.3868	0.113538	-2.31358
Q8BGQ7	Aars	Alanine--tRNA ligase, cytoplasmic	Aars	-0.145882	0.463784	0.826221	-0.993863	-	-			0.800484	4.07624	0.0042449	6.04322	+	-			-0.622677	1.68476	0.410541	-2.6633	-	-			0.323691	0.635924	0.551819	1.26722					0.177807	0.322194	0.808251	0.737564	-	-			0.946376	4.06484	0.00106667	6.02489	+
Q8BH59	Slc25a12	Calcium-binding mitochondrial carrier protein Aralar1	Slc25a12	-0.296568	0.25046	0.929154	-0.60017	-	-			-0.23261	0.620047	0.43908	-1.24258	-	-			-0.321809	2.053	0.4355	-3.12023	-	+			-0.257853	0.252144	0.829587	-0.601699					-0.554419	2.10001	0.114844	-3.23508	-	+			0.0639615	0.0526687	0.933478	0.147001
Q8BTY2	Slc4a7	Sodium bicarbonate cotransporter 3	Slc4a7	0.115956	0.110576	0.964171	0.295388	-	-			0.0786547	0.172802	0.823065	0.437963	-	-			0.194164	0.296802	0.907572	0.687414	-	-			0.156837	0.15516	0.9051	0.396131					0.272819	0.355973	0.780855	0.806797	-	-			-0.0373048	0.0409967	0.948231	-0.115771
Q8BYI6	Lpcat2	Lysophosphatidylcholine acyltransferase 2	Lpcat2	-1.15384	1.67318	0.477342	-2.95605	-	-			0.739098	1.69636	0.073774	2.81775	-	-			0.114824	0.157603	0.960061	0.402676	-	-			2.00774	3.00298	0.0558049	5.04682	+				0.853922	0.919185	0.431485	1.76763	-	-			1.89293	5.67688	0	9.69777	+
Q8BYY4	Ttc39b	Tetratricopeptide repeat protein 39B	Ttc39b	0.0469608	0.0368345	0.98099	0.106467	-	-			0.416918	0.770335	0.347313	1.50917	-	-			0.00834656	0.0138214	0.998688	0.040694	-	-			0.378291	0.396683	0.72524	0.917107					0.425265	0.495525	0.691002	1.10493	-	-			0.369942	0.614337	0.427064	1.26044
Q8BYZ1	Abi3	ABI gene family member 3	Abi3					-	-							-	-			0			0	-	-			NaN	NaN	NaN	NaN									-	-			NaN	NaN	NaN	NaN
Q8BZ20	Parp12	Poly [ADP-ribose] polymerase 12	Parp12	-0.118951	0.11384	0.962605	-0.303279	-	-			0.675243	4.20385	0.00390909	7.01021	+	-			-0.26273	0.779231	0.71523	-1.50631	-	-			0.531476	0.611596	0.56863	1.25595					0.412513	0.992337	0.388435	1.93045	-	-			0.794193	1.67553	0.0708105	2.68787
Q8C025	Chpt1	Cholinephosphotransferase 1	Chpt1	-0.857417	0.490834	0.817843	-1.07674	-	-			-1.12315	2.3411	0.0281268	-4.1024	-	+			0			0	-	-			NaN	NaN	NaN	NaN				+					-	-			-0.265733	0.185014	0.799713	-0.464806
Q8C0T5	Sipa1l1	Signal-induced proliferation-associated 1-like protein 1	Sipa1l1					-	-	+		0.0601149	0.0647218	0.931872	0.18204	-	-			0			0	-	-	+		NaN	NaN	NaN	NaN									-	-	+		NaN	NaN	NaN	NaN
Q8C4Q6	Aida	Axin interactor, dorsalization-associated protein	Aida	-0.324064	0.853605	0.665453	-1.75241	-	-			0.336866	0.711095	0.3803	1.43473	-	-			-0.513709	0.979902	0.654956	-1.86308	-	-			0.147242	0.2236	0.850166	0.56325					-0.176843	0.237774	0.851001	-0.604049	-	-			0.660942	1.86902	0.0502304	3.15383
Q8C4V1	Arhgap24	Rho GTPase-activating protein 24	Arhgap24					-	-							-	-			0			0	-	-			NaN	NaN	NaN	NaN									-	-			NaN	NaN	NaN	NaN
Q8CAS9	Parp9	Poly [ADP-ribose] polymerase 9	Parp9	0.774963	0.890705	0.646395	1.65651	-	-			0.816706	1.48234	0.105004	2.43807	-	-			0.00820051	0.020541	0.995696	0.0595651	-	-			0.0499417	0.0444189	0.969404	0.126082					0.824907	0.956395	0.406822	1.794	-	-			0.0417381	0.051947	0.934602	0.14509
Q8CBY8	Dctn4	Dynactin subunit 4	Dctn4	-0.657942	0.701598	0.724373	-1.41922	-	-			-0.23477	0.200165	0.795047	-0.497568	-	-			-0.506799	0.594064	0.773364	-1.21675	-	-			-0.0836655	0.0804229	0.943911	-0.221596					-0.74157	0.797014	0.495729	-1.60515	-	-			0.423189	0.49576	0.5196	1.04795
Q8CI15	Sphk1	Sphingosine kinase 1	Sphk1					-	-							-	-			0			0	-	-			NaN	NaN	NaN	NaN									-	-			NaN	NaN	NaN	NaN
Q8JZZ7	Adgrl2	Adhesion G protein-coupled receptor L2	Adgrl2					-	-							-	-			0			0	-	-			NaN	NaN	NaN	NaN									-	-			NaN	NaN	NaN	NaN
Q8K012	Fnbp1l	Formin-binding protein 1-like	Fnbp1l	0.458496	0.242831	0.930384	0.604809	-	-			-0.333128	0.337068	0.670885	-0.788925	-	-			0			0	-	-			NaN	NaN	NaN	NaN				+					-	-			-0.79164	0.580406	0.453253	-1.21772
Q8K094	Pvr	Poliovirus receptor	Pvr					-	-							-	-			0			0	-	-			NaN	NaN	NaN	NaN									-	-			NaN	NaN	NaN	NaN
Q8K1H1	Tdrd7	Tudor domain-containing protein 7	Tdrd7					-	-			0.805213	1.60399	0.085069	2.97212	-	-			0			0	-	-			NaN	NaN	NaN	NaN									-	-			NaN	NaN	NaN	NaN
Q8K3H0	Appl1	DCC-interacting protein 13-alpha	Appl1	-0.256865	0.329602	0.892965	-0.754118	-	-			0.419203	1.17609	0.176859	2.03507	-	-			-0.681032	0.923171	0.657054	-1.67712	-	-			-0.00494812	0.00336264	0.993508	-0.00988871					-0.261829	0.236213	0.851477	-0.569471	-	-			0.676095	1.42952	0.105702	2.36935
Q8K482	Emilin2	EMILIN-2	Emilin2					-	-							-	-		+	0.0767685	0.0270642	0.995051	0.0782067	-	-			NaN	NaN	NaN	NaN			+						-	-		+	NaN	NaN	NaN	NaN
Q8R138	Tmem119	Transmembrane protein 119	Tmem119	0.293294	0.202121	0.940657	0.510575	-	-			0.728046	1.27066	0.15089	2.31712	-	-			0.0166826	0.00972453	0.999976	0.028762	-	-			0.451433	0.229929	0.843977	0.570672					0.744729	0.417399	0.741856	0.980229	-	-			0.434767	0.445289	0.563665	0.967266
Q8R151	Znfx1	NFX1-type zinc finger-containing protein 1	Znfx1	0.0879279	0.184528	0.94859	0.468242	-	-			0.183792	0.264665	0.733275	0.631097	-	-			0.18666	0.232094	0.926822	0.564798	-	-			0.28252	0.488264	0.654187	1.05871					0.370453	0.613073	0.609651	1.29245	-	-			0.0958772	0.139011	0.846515	0.360341
Q8R1B4	Eif3c	Eukaryotic translation initiation factor 3 subunit C	Eif3c	0.0443896	0.0578556	0.975829	0.16149	-	-			0.633165	2.93327	0.0148889	4.48713	+	-			-0.433341	1.26587	0.56951	-2.15455	-	-			0.155417	0.21012	0.859432	0.516958					0.199824	0.312708	0.812923	0.725236	-	-			0.588767	1.86842	0.0501101	2.93623
Q8R2Q8	Bst2	Bone marrow stromal antigen 2	Bst2	-0.858887	0.830064	0.682473	-1.79036	-	-			0.014039	0.0192711	0.97846	0.0564033	-	-			0.175536	0.235639	0.926707	0.574768	-	-			1.04847	1.00389	0.354954	2.02206					0.189575	0.204102	0.873629	0.520358	-	-			0.872916	1.25334	0.144537	2.29006
Q8R373	Clmp	CXADR-like membrane protein	Clmp					-	-							-	-			0			0	-	-			NaN	NaN	NaN	NaN									-	-			NaN	NaN	NaN	NaN
Q8R3E3	Wipi1	WD repeat domain phosphoinositide-interacting protein 1	Wipi1					-	-			0.729171	0.562918	0.476231	1.16601	-	-			-0.629323	0.544017	0.795268	-1.13487	-	-			NaN	NaN	NaN	NaN			+		0.0998483	0.0424406	0.967314	0.121977	-	-			NaN	NaN	NaN	NaN
Q8R3U1	Pla2g16	HRAS-like suppressor 3	Pla2g16	-0.172286	0.566839	0.79037	-1.23669	-	-			-0.28158	1.41018	0.119215	-2.53603	-	-			0			0	-	-	+		NaN	NaN	NaN	NaN				+					-	-	+		-0.1093	0.429129	0.576773	-0.945084
Q8R5A3	Apbb1ip	Amyloid beta A4 precursor protein-binding family B member 1-interacting protein	Apbb1ip					-	-							-	-			0			0	-	-			NaN	NaN	NaN	NaN									-	-			NaN	NaN	NaN	NaN
Q8R5F7	Ifih1	Interferon-induced helicase C domain-containing protein 1	Ifih1	-0.950234	1.24977	0.56981	-2.18985	-	-			-0.290962	0.725418	0.371746	-1.41242	-	-			-0.153713	0.161554	0.959649	-0.411537	-	-			0.50557	0.41701	0.705287	0.917486					-0.444675	0.437261	0.727347	-0.959561	-	-			0.659293	1.05738	0.204092	1.87466
Q8VC88	Gca	Grancalcin	Gca					-	-							-	-			0			0	-	-			NaN	NaN	NaN	NaN									-	-			NaN	NaN	NaN	NaN
Q8VD31	Tapbpl	Tapasin-related protein	Tapbpl					-	-							-	-		+	-0.186224	0.143903	0.966356	-0.37276	-	-			NaN	NaN	NaN	NaN			+						-	-		+	NaN	NaN	NaN	NaN
Q8VDC1	Fyco1	FYVE and coiled-coil domain-containing protein 1	Fyco1	0.25773	0.128605	0.96267	0.345619	-	-			-0.24151	0.423888	0.595045	-0.943585	-	-			0			0	-	-	+		NaN	NaN	NaN	NaN				+					-	-	+		-0.499242	0.498759	0.516154	-1.06695
Q8VDI1	Epsti1	Epithelial-stromal interaction protein 1	Epsti1					-	-							-	-			0			0	-	-			NaN	NaN	NaN	NaN									-	-			NaN	NaN	NaN	NaN
Q8VDV8	Mitd1	MIT domain-containing protein 1	Mitd1					-	-			0.260265	0.258196	0.741017	0.624942	-	-			-0.485957	0.428839	0.855411	-0.952578	-	-			NaN	NaN	NaN	NaN			+		-0.225692	0.12978	0.918815	-0.353317	-	-			NaN	NaN	NaN	NaN
Q8VI94	Oasl1	2'-5'-oligoadenylate synthase-like protein 1	Oasl1	0.0390826	0.0338618	0.982834	0.0981729	-	-			0.699432	1.36799	0.128411	2.40478	-	-			0.316522	0.248226	0.922993	0.597906	-	-			0.97686	0.738582	0.488954	1.47942					1.01595	0.534374	0.667558	1.17702	-	-			0.66036	1.61096	0.0793154	2.64571
Q91VC9	Ghitm	Growth hormone-inducible transmembrane protein	Ghitm	0.221889	0.173258	0.952477	0.45077	-	-			-0.186868	0.154461	0.840981	-0.403292	-	-			0			0	-	-			NaN	NaN	NaN	NaN				+					-	-			-0.40878	0.349641	0.646104	-0.805448
Q91W36	Usp3	Ubiquitin carboxyl-terminal hydrolase 3	Usp3	0.273434	0.283949	0.908444	0.683061	-	-			0.130765	0.420059	0.598231	0.936612	-	-			0			0	-	-			NaN	NaN	NaN	NaN				+					-	-			-0.14268	0.208655	0.777024	-0.515677
Q91XB0	Trex1	Three-prime repair exonuclease 1	Trex1					-	-							-	-		+	-1.06126	0.979411	0.650777	-1.80322	-	-			NaN	NaN	NaN	NaN			+						-	-		+	NaN	NaN	NaN	NaN
Q91YT8	Tmem63a	CSC1-like protein 1	Tmem63a	-0.749712	0.797205	0.689863	-1.53353	-	-			0.512653	1.26884	0.151347	2.15848	-	-			-0.614601	1.12233	0.6003	-1.9628	-	-			0.64777	0.573952	0.58875	1.18407					-0.101948	0.0944458	0.93662	-0.254119	-	-			1.26236	2.02693	0.0387076	3.2058	+
Q91Z40	Gbp7	Gbp6 protein	Gbp7	0.63083	0.676764	0.736251	1.3785	-	-			0.988709	2.22483	0.0322954	3.57696	+	-			-0.280811	0.258728	0.916878	-0.619171	-	-			0.0770549	0.0426644	0.971109	0.121862					0.707899	0.547062	0.656944	1.17704	-	-			0.357909	0.475999	0.538168	1.01464
Q91ZR2	Snx18	Sorting nexin-18	Snx18	-0.316717	0.236458	0.929465	-0.576467	-	-			0.743449	1.53992	0.0957347	2.59773	-	-			-0.347628	0.462842	0.843317	-0.992255	-	-			0.7125	0.63916	0.550946	1.28903					0.395821	0.545225	0.65747	1.15771	-	-			1.06017	1.37567	0.115681	2.29902
Q91ZU6	Dst	Dystonin	Dst	0.176647	0.150314	0.956868	0.390988	-	-			0.181017	0.518688	0.509966	1.0927	-	-			-0.585923	1.48899	0.497892	-2.5836	-	-			-0.581547	0.479464	0.660894	-1.05619					-0.404905	1.13497	0.326087	-2.26071	-	-			0.00436281	0.00412379	0.991863	0.012144
Q921T2	Tor1aip1	Torsin-1A-interacting protein 1	Tor1aip1	0.066116	0.102448	0.963252	0.274545	-	-			0.497678	1.17507	0.176892	2.05609	-	-			-0.65371	1.62317	0.428778	-2.62035	-	-			-0.22215	0.396585	0.725099	-0.876642					-0.156032	0.215415	0.863239	-0.529973	-	-			0.431579	1.22125	0.153252	2.09534
Q925J9	Med1	Mediator of RNA polymerase II transcription subunit 1	Med1					-	-							-	-			0			0	-	-			NaN	NaN	NaN	NaN									-	-			NaN	NaN	NaN	NaN
Q99J10	Ctu1	Cytoplasmic tRNA 2-thiolation protein 1	Ctu1	1.28704	1.32925	0.547009	2.30189	-	-			-0.193635	0.204946	0.790848	-0.510012	-	-			0.650795	0.556802	0.790353	1.15597	-	-			-0.82985	0.640614	0.550202	-1.28201					0.457161	0.321086	0.808942	0.741254	-	-			-1.48065	1.80127	0.0562386	-2.96608
Q99JF5	Mvd	Diphosphomevalonate decarboxylase	Mvd	0.927463	1.15318	0.571527	2.08762	-	-			0.247546	0.238432	0.757837	0.577871	-	-			0.0749474	0.0667632	0.990843	0.184771	-	-			-0.604966	0.730853	0.493604	-1.44727					0.322493	0.800266	0.494289	1.6106	-	-			-0.679924	0.807349	0.312412	-1.52359
Q99KQ4	Nampt	Nicotinamide phosphoribosyltransferase	Nampt	0.460102	0.501403	0.812629	1.05739	-	-			0.726328	1.0855	0.204738	1.91295	-	-			-0.480483	1.38198	0.50971	-2.28241	-	-			-0.214231	0.36762	0.746739	-0.821287					0.245845	0.236357	0.851524	0.569765	-	-			0.266226	0.8957	0.268906	1.65015
Q99L45	Eif2s2	Eukaryotic translation initiation factor 2 subunit 2	Eif2s2	-0.447082	0.680164	0.73613	-1.34334	-	-			0.181868	0.702285	0.385	1.36842	-	-			0.0181137	0.052001	0.992041	0.145233	-	-			0.64705	1.11011	0.318931	1.96641					0.199981	0.712785	0.546637	1.39325	-	-			0.628943	1.20768	0.157012	2.07728
Q99LL5	Pwp1	Periodic tryptophan protein 1 homolog	Pwp1	-0.041431	0.067525	0.970548	-0.187414	-	-			0.677109	2.95698	0.0146737	4.71025	+	-			0.369653	0.326018	0.895437	0.747379	-	-			1.08819	1.06664	0.331253	1.92926					1.04676	1.08568	0.344962	1.95657	-	-			0.718553	1.91877	0.0458869	3.13334
Q99M15	Pstpip2	Proline-serine-threonine phosphatase-interacting protein 2	Pstpip2					-	-	+		1.60242	1.11483	0.195142	2.22375	-	-			0			0	-	-	+		NaN	NaN	NaN	NaN									-	-	+		NaN	NaN	NaN	NaN
Q99M51	Nck1	Cytoplasmic protein NCK1	Nck1	-0.0111513	0.0111366	0.990738	-0.0325383	-	-			0.201843	0.295678	0.705634	0.687179	-	-			-0.148283	0.171087	0.956738	-0.432732	-	-			0.0647133	0.0583235	0.959065	0.162722					0.0535597	0.0452004	0.966032	0.127751	-	-			0.212976	0.346257	0.65023	0.7823
Q99MK8	Grk2	Beta-adrenergic receptor kinase 1	Grk2	0.00684255	0.00624712	0.993347	0.0184036	-	-			0.813466	2.74348	0.0173961	4.20816	+	-			-0.380836	0.699353	0.744692	-1.37277	-	-			0.42576	0.457848	0.677546	0.989099					0.43263	0.59116	0.624487	1.22238	-	-			0.806614	1.69801	0.0685567	2.71684
Q99MU3	Adar	Double-stranded RNA-specific adenosine deaminase	Adar					-	-							-	-			0			0	-	-			NaN	NaN	NaN	NaN									-	-			NaN	NaN	NaN	NaN
Q99N57	Raf1	RAF proto-oncogene serine/threonine-protein kinase	Raf1	0.729973	0.771359	0.695586	1.56209	-	-			0.38671	0.492567	0.533673	1.05629	-	-			-0.295157	0.525864	0.802494	-1.12433	-	-			-0.638424	1.00801	0.353851	-2.02952					0.0915534	0.0841759	0.939847	0.231157	-	-			-0.3433	0.50579	0.510546	-1.10363
Q99PG2	Ogfr	Opioid growth factor receptor	Ogfr	-0.246627	0.260748	0.920212	-0.623237	-	-			-0.248266	0.349999	0.657905	-0.792101	-	-			0.117787	0.219651	0.927856	0.536949	-	-			0.116157	0.143958	0.912405	0.372886					-0.130478	0.152641	0.906942	-0.394311	-	-			-0.00162561	0.00188153	0.994563	-0.00554251
Q9CQA9	Ntpcr	Cancer-related nucleoside-triphosphatase homolog	Ntpcr					-	-							-	-			0			0	-	-			NaN	NaN	NaN	NaN				+					-	-			-0.280742	0.123418	0.865414	-0.333019
Q9CQJ6	Denr	Density-regulated protein	Denr	-0.647025	0.554564	0.790629	-1.14495	-	-			-0.0150698	0.0252774	0.972974	-0.072561	-	-			-0.0236576	0.0531256	0.992007	-0.148553	-	-			0.60827	0.473798	0.662995	1.0166					-0.0387274	0.0674766	0.949917	-0.186619	-	-			0.631921	0.616933	0.425614	1.23773
Q9CQW9	Ifitm3	Interferon-induced transmembrane protein 3	Ifitm3	-0.217429	0.198432	0.943378	-0.492147	-	-			1.97223	5.15091	0.0016	7.93428	+	-			-1.30385	1.13587	0.604017	-1.98106	-	-			0.8858	0.534066	0.618181	1.11148					0.668373	0.453713	0.719953	0.976617	-	-			2.18967	3.30233	0.00476596	4.86521	+
Q9CRY7	Gdpd1	Lysophospholipase D GDPD1	Gdpd1	0.204903	0.219042	0.935312	0.535678	-	-			-0.682882	1.56915	0.0915076	-2.55057	-	-			0.0907017	0.1021	0.974733	0.272219	-	-			-0.79705	1.0016	0.355294	-1.81472					-0.59218	0.870972	0.456514	-1.62794	-	-			-0.887791	1.55567	0.0866431	-2.53312
Q9CZD3	Gars	Glycine--tRNA ligase	Gars	-0.677068	1.44322	0.510069	-2.42036	-	-			0.0478216	0.106302	0.88282	0.282393	-	-			-0.100512	0.12689	0.969875	-0.330612	-	-			0.624381	0.881952	0.411879	1.63066					-0.0526907	0.0598911	0.953534	-0.165983	-	-			0.72491	1.65043	0.0734161	2.65552
Q9CZE3	Rab32	Ras-related protein Rab-32	Rab32	-0.587171	1.06944	0.589854	-1.96329	-	-			0.483808	0.886761	0.290487	1.63749	-	-			0.0540129	0.0538169	0.992421	0.150036	-	-			1.12502	1.59894	0.180419	2.74687					0.53782	0.72713	0.540395	1.41501	-	-			1.07101	2.2638	0.0263925	3.63448	+
Q9D0Q7	Mrpl45	39S ribosomal protein L45, mitochondrial	Mrpl45	0.45306	0.912094	0.639368	1.68732	-	-			0.363178	0.766348	0.34951	1.4637	-	-			-0.0963279	0.134748	0.967076	-0.348844	-	-			-0.186203	0.262676	0.824416	-0.622714					0.26685	0.356549	0.780395	0.801167	-	-			-0.089874	0.179123	0.805556	-0.449171
Q9D0R2	Tars	Threonine--tRNA ligase, cytoplasmic	Tars	-0.491383	1.65278	0.476525	-2.7018	-	-			0.00164327	0.00524566	0.991112	0.0153933	-	-			-0.102007	0.307044	0.901242	-0.706906	-	-			0.391007	1.09648	0.320285	1.92784					-0.100364	0.331177	0.802062	-0.754371	-	-			0.493021	1.63969	0.0746426	2.64167
Q9D1M4	Eef1e1	Eukaryotic translation elongation factor 1 epsilon-1	Eef1e1	0.442228	1.27217	0.552393	2.26343	-	-			0.296378	1.17126	0.177614	2.07866	-	-			-0.331783	0.401894	0.872281	-0.886094	-	-			-0.477627	0.543337	0.612735	-1.13375					-0.0354051	0.0241868	0.984364	-0.0704183	-	-			-0.145839	0.424287	0.581504	-0.921705
Q9D281	Fam114a1	Protein Noxp20	Fam114a1	0.0961285	0.0968413	0.965035	0.264662	-	-			-0.117997	0.14892	0.844941	-0.387769	-	-			0.251159	0.438447	0.849615	0.961668	-	-			0.0370503	0.041633	0.972319	0.11904					0.133162	0.136247	0.917293	0.35824	-	-			-0.21411	0.424832	0.58135	-0.945302
Q9D2Y4	Mlkl	Mixed lineage kinase domain-like protein	Mlkl					-	-			0.864754	1.25225	0.155631	2.23403	-	-			-0.341957	0.428154	0.856438	-0.937209	-	-			NaN	NaN	NaN	NaN			+		0.522797	0.558918	0.645379	1.22217	-	-			NaN	NaN	NaN	NaN
Q9D620	Rab11fip1	Rab11 family-interacting protein 1	Rab11fip1	-0.366387	0.44618	0.836295	-0.983887	-	-			-0.452715	0.614393	0.441961	-1.26053	-	-			0			0	-	-	+		NaN	NaN	NaN	NaN				+					-	-	+		-0.0863266	0.105598	0.881496	-0.282223
Q9D820	Prorsd1	Prolyl-tRNA synthetase associated domain-containing protein 1	Prorsd1	-0.401626	0.51208	0.802998	-1.08161	-	-			9.2e-05	0.000117133	0.996672	0.000345742	-	-			-0.460002	1.18054	0.596047	-2.02256	-	-			-0.0583001	0.0653184	0.95368	-0.180504					-0.45991	0.665186	0.576548	-1.31219	-	-			0.401714	1.12548	0.181351	1.9877
Q9D832	Dnajb4	DnaJ homolog subfamily B member 4	Dnajb4	-0.517352	1.37929	0.518172	-2.33413	-	-			-0.256687	0.713219	0.379139	-1.38484	-	-			-0.179956	0.366452	0.878973	-0.822297	-	-			0.0806938	0.11765	0.923566	0.311257					-0.436643	1.21816	0.298003	-2.14515	-	-			0.260662	0.555986	0.47152	1.14131
Q9D8C4	Ifi35	Interferon-induced 35 kDa protein homolog	Ifi35	-0.551355	0.67938	0.736379	-1.36558	-	-			0.444846	1.35176	0.132126	2.33355	-	-			-0.181861	0.434621	0.854413	-0.94859	-	-			0.814308	1.10338	0.319499	2.01377					0.262986	0.548914	0.655278	1.18031	-	-			0.996205	2.09766	0.0350413	3.23205	+
Q9DAI2	Ift22	Intraflagellar transport protein 22 homolog	Ift22					-	-							-	-			0			0	-	-			NaN	NaN	NaN	NaN				+					-	-			NaN	NaN	NaN	NaN
Q9DAM7	Tmem263	Transmembrane protein 263	Tmem263					-	-			0.953752	2.71224	0.0181985	4.81174	+	-			-0.553634	0.973606	0.645738	-1.81992	-	-			NaN	NaN	NaN	NaN			+		0.400118	0.442882	0.725222	1.0058	-	-			NaN	NaN	NaN	NaN
Q9DBC3	Cmtr1	Cap-specific mRNA (nucleoside-2'-O-)-methyltransferase 1	Cmtr1	0.196779	0.307678	0.896691	0.715567	-	-			0.313139	0.827677	0.317027	1.56477	-	-			0.0182757	0.0533072	0.99206	0.148689	-	-			0.134683	0.283841	0.808201	0.666475					0.331415	0.804601	0.491993	1.54469	-	-			0.1164	0.259989	0.726007	0.617373
Q9DBK7	Uba7	MCG18845, isoform CRA_d	Uba7	-0.052893	0.0280068	0.986376	-0.0803459	-	-			0.819368	1.01195	0.2323	1.81237	-	-			-0.206858	0.419551	0.861646	-0.913467	-	-			0.665383	0.668572	0.531129	1.32546					0.612511	0.618297	0.604578	1.24696	-	-			0.872238	1.06712	0.200889	1.88794
Q9DBR3	Armc8	Armadillo repeat-containing protein 8	Armc8	-0.571021	0.545366	0.789283	-1.17405	-	-			0.524129	2.76198	0.0173279	4.23506	+	-			-0.0298312	0.0754785	0.985593	-0.207196	-	-			1.0653	0.937076	0.390019	1.90183					0.494298	1.23944	0.294182	2.26834	-	-			1.09513	1.70061	0.0683839	2.89892
Q9DBS9	Osbpl3	Oxysterol-binding protein-related protein 3	Osbpl3					-	-	+		0.406274	0.405509	0.610674	0.956268	-	-			0			0	-	-	+		NaN	NaN	NaN	NaN									-	-	+		NaN	NaN	NaN	NaN
Q9DBX3	Susd2	Sushi domain-containing protein 2	Susd2	-0.141083	0.46128	0.826159	-0.989585	-	-			0.0845389	0.448868	0.575057	0.964044	-	-			0.0303116	0.0301171	0.99401	0.0858483	-	-			0.255967	0.274682	0.816752	0.646402					0.11485	0.114434	0.929339	0.301896	-	-			0.225624	0.863815	0.285376	1.60484
Q9DCE9	Igtp	Interferon gamma-induced GTPase	Igtp	-0.140736	0.130842	0.962287	-0.34779	-	-			2.11718	4.27407	0.00361905	7.15794	+	-			-0.405696	0.382795	0.878886	-0.85192	-	-			1.85219	1.60684	0.180397	2.84893					1.71148	1.58931	0.196011	2.82076	-	-			2.25792	3.90142	0.00219718	6.39859	+
Q9ERD6	Ralgps2	Ras-specific guanine nucleotide-releasing factor RalGPS2	Ralgps2					-	-							-	-			0			0	-	-			NaN	NaN	NaN	NaN									-	-			NaN	NaN	NaN	NaN
Q9ERI2	Rab27a	Ras-related protein Rab-27A	Rab27a	0.125647	0.097664	0.965006	0.263786	-	-			0.597025	0.854574	0.304537	1.61958	-	-			-0.298819	0.850713	0.685619	-1.61383	-	-			0.172558	0.214728	0.855438	0.53088					0.298206	0.222269	0.859578	0.554283	-	-			0.471368	1.2818	0.138437	2.1756
Q9ET26	Rnf114	E3 ubiquitin-protein ligase RNF114	Rnf114	-0.680834	0.780393	0.691945	-1.50807	-	-			0.425681	0.986204	0.243518	1.77681	-	-			-0.175917	0.243357	0.925486	-0.583989	-	-			0.930586	1.01405	0.35257	1.85347					0.249763	0.291043	0.820283	0.680507	-	-			1.10651	1.81581	0.0551001	2.9207
Q9JHK5	Plek	Pleckstrin	Plek					-	-							-	-		+	0			0	-	-	+		NaN	NaN	NaN	NaN									-	-			NaN	NaN	NaN	NaN
Q9JHQ5	Lztfl1	Leucine zipper transcription factor-like protein 1	Lztfl1					-	-							-	-			0			0	-	-			NaN	NaN	NaN	NaN									-	-			NaN	NaN	NaN	NaN
Q9JI90	Rnf14	E3 ubiquitin-protein ligase RNF14	Rnf14	0.163942	0.34871	0.885213	0.822912	-	-			0.175871	0.284227	0.715762	0.669922	-	-			0			0	-	-			NaN	NaN	NaN	NaN				+					-	-			0.01189	0.0138078	0.979312	0.0404747
Q9JIB4	Gtf2h2	General transcription factor IIH subunit 2	Gtf2h2	-0.0157979	0.00931464	0.991385	-0.0282972	-	-			0.180887	0.154003	0.841078	0.399475	-	-			0			0	-	-			NaN	NaN	NaN	NaN				+					-	-			0.196716	0.248279	0.737642	0.604513
Q9JIK5	Ddx21	Nucleolar RNA helicase 2	Ddx21	-0.390495	0.788392	0.691387	-1.5068	-	-			1.09374	4.08104	0.00433333	6.05095	+	-			-0.254613	0.900595	0.672856	-1.64582	-	-			1.22964	3.64872	0.0412308	5.37654	+				0.839131	3.02876	0.098	4.47706	+	-			1.48425	4.44105	0.000235294	6.64778	+
Q9JIY5	Htra2	Serine protease HTRA2, mitochondrial	Htra2	-0.575923	0.335523	0.888795	-0.772864	-	-			-0.456152	0.407639	0.609288	-0.900793	-	-			0.767588	0.703101	0.743922	1.40338	-	-			0.88735	0.488922	0.653454	1.05987					0.311436	0.181106	0.890228	0.468693	-	-			0.11975	0.0757953	0.910925	0.206916
Q9JJ89	Ccdc86	Coiled-coil domain-containing protein 86	Ccdc86					-	-							-	-		+	0			0	-	-	+		NaN	NaN	NaN	NaN									-	-			NaN	NaN	NaN	NaN
Q9JJF9	Sppl2a	Signal peptide peptidase-like 2A	Sppl2a					-	-			0.263667	0.362898	0.647745	0.830598	-	-			0			0	-	-			NaN	NaN	NaN	NaN									-	-			NaN	NaN	NaN	NaN
Q9JJT0	Rcl1	RNA 3'-terminal phosphate cyclase-like protein	Rcl1					-	-							-	-			0			0	-	-			NaN	NaN	NaN	NaN									-	-			NaN	NaN	NaN	NaN
Q9JKL4	Ndufaf3	NADH dehydrogenase [ubiquinone] 1 alpha subcomplex assembly factor 3	Ndufaf3					-	-							-	-			0			0	-	-			NaN	NaN	NaN	NaN									-	-			NaN	NaN	NaN	NaN
Q9JL16	Isg20	Interferon-stimulated gene 20 kDa protein	Isg20					-	-							-	-		+	0			0	-	-	+		NaN	NaN	NaN	NaN									-	-			NaN	NaN	NaN	NaN
Q9JL56	Gde1	Glycerophosphodiester phosphodiesterase 1	Gde1					-	-			0.100444	0.076729	0.918844	0.212127	-	-			0			0	-	-			NaN	NaN	NaN	NaN									-	-			NaN	NaN	NaN	NaN
Q9JM13	Rabgef1	Rab5 GDP/GTP exchange factor	Rabgef1	-1.25206	1.34835	0.538832	-2.66084	-	-			0.115767	0.124679	0.864726	0.327951	-	-			-0.0352046	0.0260325	0.995038	-0.0750467	-	-			1.33265	0.953064	0.382017	1.93054					0.0805626	0.0598383	0.953411	0.169083	-	-			1.36784	1.58822	0.0814636	2.73091
Q9JM51	Ptges	Prostaglandin E synthase	Ptges	0.393271	0.24195	0.929429	0.613257	-	-			2.15072	2.09179	0.0404218	3.49867	+	-			-0.298912	0.223316	0.924414	-0.542977	-	-			1.45853	1.11817	0.318648	2.07917					1.8518	1.388	0.249731	2.50111	-	-			1.75743	1.80341	0.05624	3.05401
Q9JMH6	Txnrd1	Thioredoxin reductase 1, cytoplasmic	Txnrd1	-0.28428	0.450564	0.833901	-0.971201	-	-			0.158887	0.570285	0.470406	1.16419	-	-			-0.175475	0.295545	0.908654	-0.685009	-	-			0.267705	0.322918	0.781225	0.738925					-0.0165873	0.0208111	0.985214	-0.0600272	-	-			0.443176	0.884648	0.274249	1.63449
Q9QUH0	Glrx	Glutaredoxin-1	Glrx	-0.715793	0.559212	0.791675	-1.15993	-	-			-0.549283	0.432353	0.590558	-0.944604	-	-			-0.282562	0.131507	0.968304	-0.347065	-	-			-0.116034	0.0475289	0.966549	-0.135099					-0.831845	0.348315	0.788108	-0.810836	-	-			0.166483	0.134553	0.851043	0.350027
Q9QUK4	Naip2	Baculoviral IAP repeat-containing protein 1b	Naip2					-	-			-0.262543	0.700656	0.385499	-1.53649	-	-			0			0	-	-			NaN	NaN	NaN	NaN									-	-			NaN	NaN	NaN	NaN
Q9QUN7	Tlr2	Toll-like receptor 2	Tlr2					-	-							-	-			0			0	-	-			NaN	NaN	NaN	NaN									-	-			NaN	NaN	NaN	NaN
Q9QY24	Zbp1	Z-DNA-binding protein 1	Zbp1					-	-							-	-		+	-0.265724	0.262663	0.91647	-0.627084	-	-			NaN	NaN	NaN	NaN			+						-	-		+	NaN	NaN	NaN	NaN
Q9QYF1	Rdh11	Retinol dehydrogenase 11	Rdh11	0.281477	0.26763	0.918041	0.644203	-	-			0.319214	0.427748	0.593257	0.936492	-	-			0			0	-	-			NaN	NaN	NaN	NaN				+					-	-			0.0377398	0.0330117	0.95705	0.0942078
Q9QYI5	Dnajb2	DnaJ homolog subfamily B member 2	Dnajb2	-0.257592	0.231594	0.928108	-0.566352	-	-			0.395393	0.842127	0.310616	1.57379	-	-			-0.0527813	0.0763515	0.985223	-0.209424	-	-			0.6002	0.54037	0.61463	1.16521					0.342611	0.533051	0.668491	1.12538	-	-			0.652975	0.865893	0.284495	1.63643
Q9QZ85	Iigp1	Interferon-inducible GTPase 1	Iigp1					-	-	+		2.77224	3.38415	0.00787302	5.78341	+	-			-0.661134	0.460082	0.845557	-0.992966	-	-			NaN	NaN	NaN	NaN			+		2.1111	1.04747	0.36115	2.10095	-	-			NaN	NaN	NaN	NaN
Q9QZD8	Slc25a10	Mitochondrial dicarboxylate carrier	Slc25a10	0.0866167	0.0917806	0.965774	0.249174	-	-			-1.08436	2.90469	0.0155169	-4.62504	-	+			0.372179	0.539637	0.797726	1.12061	-	-			-0.798793	1.05559	0.336371	-1.91337					-0.712185	1.04047	0.364105	-1.95789	-	-			-1.17096	2.48784	0.0171182	-3.74249		+
Q9R118	Htra1	Serine protease HTRA1	Htra1	-0.0710249	0.0349975	0.982384	-0.100746	-	-			0.73462	0.331495	0.674379	0.770644	-	-			0			0	-	-			NaN	NaN	NaN	NaN				+					-	-			0.805659	0.475992	0.53798	1.0276
Q9R233	Tapbp	Tapasin	Tapbp	-0.0596644	0.0332765	0.982567	-0.0955347	-	-			1.20064	2.26238	0.0312232	3.63238	+	-			-0.349104	0.438386	0.849342	-0.955195	-	-			0.911191	0.705757	0.508875	1.40759					0.851534	0.880466	0.456126	1.74452	-	-			1.26029	1.69221	0.0689451	2.70937
Q9WTK0	Nupr1	Nuclear protein 1	Nupr1					-	-							-	-			0			0	-	-			NaN	NaN	NaN	NaN				+					-	-			-2.53883	2.48907	0.0171329	-5.28079		+
Q9WTK5	Nfkb2	Nuclear factor NF-kappa-B p100 subunit	Nfkb2	-0.279472	0.330249	0.893454	-0.762818	-	-			0.881308	2.68672	0.0186963	4.27759	+	-			-0.332724	0.7	0.746532	-1.36498	-	-			0.82805	1.39302	0.224506	2.35267					0.548584	1.10246	0.341305	2.0124	-	-			1.16077	2.55473	0.0155346	3.83136	+
Q9WUU8	Tnip1	TNFAIP3-interacting protein 1	Tnip1					-	-			0.0366964	0.0341611	0.962574	0.0990102	-	-			0.0263618	0.0346673	0.992785	0.100425	-	-			NaN	NaN	NaN	NaN			+		0.0630582	0.0587006	0.954816	0.169577	-	-			NaN	NaN	NaN	NaN
Q9WV86	Katna1	Katanin p60 ATPase-containing subunit A1	Katna1					-	-			-0.309725	0.222891	0.774968	-0.555619	-	-			0			0	-	-			NaN	NaN	NaN	NaN									-	-			NaN	NaN	NaN	NaN
Q9WV92	Epb41l3	Band 4.1-like protein 3	Epb41l3	0.310089	0.443758	0.837305	0.959461	-	-			-0.941309	1.90481	0.0533725	-2.98309	-	-			0.315297	0.382742	0.878584	0.851825	-	-			-0.9361	1.4328	0.210475	-2.44738					-0.626011	1.14075	0.326436	-2.03524	-	-			-1.25139	2.22887	0.0280268	-3.40242		+
Q9WVB0	Rbpms	RNA-binding protein with multiple splicing	Rbpms	-0.136963	0.113479	0.963178	-0.30127	-	-			0.213269	0.55651	0.481736	1.14811	-	-			-0.034028	0.0431646	0.992504	-0.121625	-	-			0.3162	0.281456	0.80964	0.661809					0.179241	0.207605	0.870586	0.513446	-	-			0.350209	0.438752	0.569682	0.946703
Q9WVK4	Ehd1	EH domain-containing protein 1	Ehd1	0.176083	0.250503	0.929394	0.600257	-	-			0.404741	1.25713	0.154337	2.14298	-	-			-0.752605	1.21354	0.588618	-2.06562	-	-			-0.523931	0.586521	0.583191	-1.18997					-0.347864	0.361932	0.777302	-0.810972	-	-			0.228684	0.513159	0.504681	1.07173
Q9WVL2	Stat2	Signal transducer and activator of transcription 2	Stat2	0.778465	0.712402	0.717753	1.55941	-	-			0.927292	1.75722	0.0673879	2.98414	-	-			-0.597475	0.840321	0.689909	-1.61747	-	-			-0.4486	0.303892	0.79455	-0.746751					0.329817	0.359002	0.778121	0.861548	-	-			0.148819	0.136778	0.848973	0.357687
Q9Z0E6	Gbp2	Guanylate-binding protein 2	Gbp2	-0.101804	0.111586	0.964916	-0.29928	-	-			1.36768	2.45856	0.0238111	3.92604	+	-			-0.291633	0.256131	0.917597	-0.613932	-	-			1.17786	1.24032	0.272112	2.26972					1.07604	1.16013	0.320299	2.20981	-	-			1.4695	2.53418	0.0162577	3.90797	+
Q9Z0H7	Bcl10	B-cell lymphoma/leukemia 10	Bcl10					-	-							-	-			0			0	-	-			NaN	NaN	NaN	NaN									-	-			NaN	NaN	NaN	NaN
Q9Z2B9	Rps6ka4	Ribosomal protein S6 kinase alpha-4	Rps6ka4	-0.357073	0.689395	0.731546	-1.38157	-	-			0.388252	0.877087	0.294115	1.65304	-	-			-0.100731	0.130205	0.969657	-0.340957	-	-			0.644584	1.0861	0.324332	1.98808					0.287521	0.468385	0.711171	1.03608	-	-			0.745305	1.83524	0.0531674	2.89352
Q9Z2X2	Psmd10	26S proteasome non-ATPase regulatory subunit 10	Psmd10					-	-							-	-			0			0	-	-			NaN	NaN	NaN	NaN									-	-			NaN	NaN	NaN	NaN
A0A0A6YY83	Pcdh7	Protocadherin 7	Pcdh7	0.0720139	0.0998923	0.96389	0.274714	-	-			0.537946	0.960517	0.254691	1.7757	-	-			-0.0650184	0.0426633	0.991741	-0.120889	-	-			0.400908	0.203519	0.86526	0.519063					0.472928	0.297812	0.817226	0.711094	-	-			0.465905	0.689951	0.378573	1.38246
A1L3P4	Slc9a6	Sodium/hydrogen exchanger	Slc9a6					-	-							-	-			0			0	-	-			NaN	NaN	NaN	NaN				+					-	-			0.20192	0.111825	0.87638	0.298413
A2A8Z1	Osbpl9	Oxysterol-binding protein-related protein 9	Osbpl9	0.0329037	0.0254621	0.986341	0.074031	-	-			-0.0952345	0.0503803	0.948954	-0.141657	-	-			-0.240805	0.124592	0.968512	-0.327747	-	-			-0.368934	0.268146	0.821612	-0.645252					-0.336039	0.278529	0.833281	-0.672018	-	-			-0.128131	0.0714081	0.916769	-0.196201
A2AJ88	Pnpla7	Patatin-like phospholipase domain-containing protein 7	Pnpla7	0.641523	0.870045	0.655407	1.86967	-	-			0.560894	1.08301	0.205846	2.08116	-	-			0			0	-	-			NaN	NaN	NaN	NaN				+					-	-			-0.0806202	0.295628	0.693044	-0.706698
A6H8H2	Dennd4c	DENN domain-containing protein 4C	Dennd4c	0.0607061	0.0783959	0.970902	0.214008	-	-			0.220429	0.749623	0.360105	1.43903	-	-			-0.149815	0.446705	0.850871	-0.964551	-	-			0.0099069	0.0110851	0.986152	0.0324795					0.0706138	0.114563	0.929285	0.303872	-	-			0.159695	0.30822	0.68302	0.71116
B1AZP2	Dlgap4	Disks large-associated protein 4	Dlgap4					-	-			-0.215267	0.465091	0.559347	-1.01771	-	-			0.00192483	0.00223894	0.999987	0.00667822	-	-			NaN	NaN	NaN	NaN			+		-0.213343	0.258259	0.843224	-0.648949	-	-			NaN	NaN	NaN	NaN
B2RQC6	Cad	CAD protein	Cad	0.302439	0.65609	0.742896	1.30612	-	-			0.741998	2.80782	0.0168139	4.17232	+	-			-0.0757664	0.160098	0.958625	-0.4063	-	-			0.363797	0.829092	0.437166	1.55504					0.666231	1.56941	0.200103	2.5509	-	-			0.439554	2.12147	0.0337661	3.26288	+
D3Z7P3	Gls	Glutaminase kidney isoform, mitochondrial	Gls	0.173374	0.124006	0.960347	0.327613	-	-			-0.460999	0.937167	0.264952	-1.74156	-	-			0.330306	0.620056	0.764346	1.25857	-	-			-0.304084	0.236265	0.840044	-0.576068					-0.130693	0.104219	0.931048	-0.283052	-	-			-0.634362	1.00555	0.223021	-1.80355
E9PWR4	Dip2c	Disco-interacting protein 2 homolog C	Dip2c	0.0625909	0.116641	0.962795	0.320738	-	-			-0.030337	0.0639287	0.932829	-0.178852	-	-			-0.703446	1.56185	0.45308	-2.77678	-	-			-0.7964	1.0776	0.328672	-2.29239					-0.733783	1.16819	0.31813	-2.48439	-	-			-0.0929333	0.175253	0.809677	-0.447615
E9PYG6	Rasa1	RAS p21 protein activator 1	Rasa1	-0.564811	1.19656	0.574926	-2.54567	-	-			-0.320861	0.780957	0.340999	-1.52571	-	-			-0.340767	0.509541	0.813794	-1.07734	-	-			-0.0968409	0.0742402	0.948937	-0.208767					-0.661628	0.714324	0.545591	-1.50342	-	-			0.243977	0.482264	0.531676	1.03849
E9PZQ0	Ryr1	Ryanodine receptor 1	Ryr1	0.00499573	0.00282568	0.993433	0.0083855	-	-			-0.0696487	0.0418777	0.956094	-0.119174	-	-			0			0	-	-	+		NaN	NaN	NaN	NaN				+					-	-	+		-0.0746403	0.0477352	0.939195	-0.135047
E9Q0S6	Tns1	Tensin 1	Tns1	0.431664	1.27088	0.550063	2.18714	-	-			-0.42031	0.87085	0.297115	-1.61487	-	-			-0.142991	0.259186	0.916896	-0.614167	-	-			-0.994931	3.93764	0.052	-5.82243		+			-0.563301	1.71754	0.167683	-2.742	-	-			-0.851974	2.4113	0.0198617	-3.64136		+
E9Q5C9	Nolc1	Nucleolar and coiled-body phosphoprotein 1	Nolc1	0.113026	0.157107	0.954291	0.402857	-	-			0.414772	1.06039	0.214989	1.89723	-	-			-0.302009	0.526544	0.802621	-1.09365	-	-			-0.000283241	0.000291021	0.994755	-0.000860784					0.112763	0.123284	0.921964	0.324651	-	-			0.30173	0.714895	0.363881	1.38735
E9Q616	Ahnak	AHNAK nucleoprotein (desmoyokin)	Ahnak	-0.703647	2.47151	0.579059	-3.81943	-	+			-0.371763	2.5766	0.0201761	-3.86051	-	+			-0.222127	0.884539	0.676249	-1.62344	-	-			0.109743	0.221252	0.852084	0.5387					-0.593889	2.90847	0.0966061	-4.31026	-	+			0.3319	1.04777	0.205887	1.86153
E9Q7G0	Numa1	Nuclear mitotic apparatus protein 1	Numa1	0.0968863	0.293974	0.903451	0.686191	-	-			0.123856	0.418931	0.599253	0.912388	-	-			0.0708545	0.255026	0.917897	0.605896	-	-			0.097781	0.361566	0.751094	0.810306					0.194711	0.584152	0.628845	1.18622	-	-			0.0269524	0.133461	0.851878	0.346608
E9QAS7	Inpp5a	Inositol polyphosphate-5-phosphatase A	Inpp5a	-0.58367	0.239699	0.928949	-0.586684	-	-			-0.388752	0.572045	0.468893	-1.18095	-	-			-0.446613	0.482159	0.833219	-1.03091	-	-			-0.251675	0.08737	0.93959	-0.239247					-0.835364	0.970266	0.398818	-1.8938	-	-			0.194914	0.093845	0.891725	0.252637
O08583	Alyref	THO complex subunit 4	Alyref	0.366362	0.428513	0.840251	0.937841	-	-			-0.0521169	0.0575705	0.939455	-0.160283	-	-			-0.0485186	0.0388993	0.990912	-0.110084	-	-			-0.467034	0.42681	0.697321	-0.930005					-0.100636	0.0716023	0.94849	-0.197265	-	-			-0.418507	0.59836	0.440351	-1.20865
O08738	Casp6	Caspase-6	Casp6	0.144425	0.134014	0.963083	0.351225	-	-			0.0143012	0.0214216	0.975915	0.0620596	-	-			0.23149	0.492548	0.828637	1.04861	-	-			0.101392	0.0922994	0.937588	0.250468					0.245791	0.364164	0.775475	0.841442	-	-			-0.130112	0.167877	0.816189	-0.424484
O35566	Cd151	CD151 antigen	Cd151	-0.249594	0.168739	0.952214	-0.43071	-	-			-0.11705	0.166849	0.828499	-0.424731	-	-			0.374435	0.502513	0.818385	1.07339	-	-			0.506967	0.310613	0.788905	0.73001					0.257385	0.289562	0.822043	0.703089	-	-			0.132567	0.110143	0.878152	0.291636
O35678	Mgll	Monoglyceride lipase	Mgll	0.414097	0.544719	0.789635	1.12892	-	-			0.939278	1.42069	0.117083	2.35784	-	-			-1.67349	2.63048	0.5368	-4.04518	-	+			-1.14828	1.88874	0.131063	-3.09046					-0.73421	1.04194	0.363977	-1.89372	-	-			0.525188	0.693411	0.376009	1.35505
O35744	Chil3	Chitinase-like protein 3	Chil3					-	-							-	-		+	-0.528991	0.304043	0.903404	-0.703204	-	-			NaN	NaN	NaN	NaN			+						-	-		+	NaN	NaN	NaN	NaN
O54890	Itgb3	Integrin beta-3	Itgb3	0.156686	0.555659	0.790106	1.14673	-	-			-0.0852015	0.167943	0.827823	-0.424629	-	-			-0.168331	0.237973	0.926924	-0.574794	-	-			-0.410236	0.835789	0.43406	-1.59154					-0.253532	0.430428	0.732076	-0.941216	-	-			-0.241874	0.640421	0.409143	-1.27417
O70145	Ncf2	Neutrophil cytosol factor 2	Ncf2	-0.0995317	0.102722	0.963628	-0.279337	-	-			2.46864	4.72578	0.00235294	8.16467	+	-			-0.596332	0.665669	0.754444	-1.33094	-	-			1.97185	1.84059	0.135957	3.40343					1.87231	1.73877	0.165281	3.21513	-	-			2.56816	4.89923	0	8.5791	+
O70161	Pip5k1c	Phosphatidylinositol 4-phosphate 5-kinase type-1 gamma	Pip5k1c					-	-							-	-			0			0	-	-			NaN	NaN	NaN	NaN									-	-			NaN	NaN	NaN	NaN
O70309	Itgb5	Integrin beta-5	Itgb5	-0.217397	0.61668	0.771621	-1.26426	-	-			0.26663	0.352466	0.655902	0.796654	-	-			0.392728	0.274953	0.910876	0.651605	-	-			0.876736	0.723703	0.496932	1.45526					0.659358	0.515588	0.679148	1.1065	-	-			0.484018	0.730292	0.355599	1.41979
O70480	Vamp4	Vesicle-associated membrane protein 4	Vamp4					-	-							-	-			0			0	-	-			NaN	NaN	NaN	NaN									-	-			NaN	NaN	NaN	NaN
O88428	Papss2	Bifunctional 3'-phosphoadenosine 5'-phosphosulfate synthase 2	Papss2	0.621709	1.05305	0.597644	1.88697	-	-			-0.583462	1.14986	0.184323	-1.99989	-	-			0.118345	0.114105	0.971351	0.300492	-	-			-1.08684	1.52583	0.190693	-2.49449					-0.465117	0.610578	0.611039	-1.22781	-	-			-1.20519	2.16874	0.0308285	-3.32422		+
O88455	Dhcr7	7-dehydrocholesterol reductase	Dhcr7	0.0250365	0.0313261	0.983828	0.089555	-	-			-0.49121	1.46094	0.109197	-2.41025	-	-			0.149742	0.143169	0.96653	0.368157	-	-			-0.366498	0.345801	0.764403	-0.781461					-0.341469	0.371086	0.772481	-0.827552	-	-			-0.516226	0.937621	0.249858	-1.70916
O88844	Idh1	Isocitrate dehydrogenase [NADP] cytoplasmic	Idh1	-0.32215	0.999828	0.611971	-1.81222	-	-			-0.381057	2.18902	0.0343184	-3.35056	-	+			0.00123242	0.00171936	0.999415	0.00505617	-	-			-0.0576858	0.0727156	0.949746	-0.199079					-0.379825	0.808497	0.488368	-1.52526	-	-			-0.0589147	0.120147	0.866943	-0.315455
O88876	Dhrs3	Short-chain dehydrogenase/reductase 3	Dhrs3	0.544101	0.295559	0.90255	0.700305	-	-			1.2684	3.13715	0.0112593	5.29908	+	-			-0.679048	0.609902	0.766211	-1.24228	-	-			0.0452602	0.0175411	0.984394	0.0512084					0.589352	0.360146	0.779002	0.825396	-	-			0.724323	0.590002	0.446588	1.21017
O88958	Gnpda1	Glucosamine-6-phosphate isomerase 1	Gnpda1	0.0478271	0.0397722	0.98003	0.113934	-	-			-0.116022	0.150863	0.843819	-0.38869	-	-			0.104472	0.0964821	0.975518	0.2599	-	-			-0.0593399	0.0389067	0.97385	-0.111552					-0.0115504	0.0091681	0.988203	-0.0272933	-	-			-0.16384	0.168509	0.815094	-0.427027
P01910	H2-Aa	H-2 class II histocompatibility antigen, A-K alpha chain	H2-Aa	-0.420024	0.248491	0.929334	-0.609897	-	-			-0.58931	0.383997	0.629083	-0.858205	-	-			1.11298	0.677275	0.750858	1.36221	-	-			0.943683	0.502654	0.643433	1.11822					0.523674	0.326539	0.804312	0.778525	-	-			-0.169264	0.082275	0.90352	-0.224452
P04230	H2-Eb1	H-2 class II histocompatibility antigen, E-B beta chain	H2-Eb1					-	-							-	-			0			0	-	-			NaN	NaN	NaN	NaN									-	-			NaN	NaN	NaN	NaN
P04370	Mbp	Myelin basic protein	Mbp	-0.428261	0.368119	0.874144	-0.83409	-	-			-1.47673	2.25334	0.031489	-3.61901	-	+			-0.849855	0.589856	0.773763	-1.25211	-	-			-1.89833	1.12357	0.318122	-2.23976					-2.32659	2.01355	0.127649	-3.52266	-	+			-1.04844	1.0885	0.193486	-2.03289
P04441	Cd74	H-2 class II histocompatibility antigen gamma chain	Cd74	-0.240447	0.114765	0.962355	-0.306996	-	-			1.04567	1.05621	0.216698	1.8914	-	-			0.211049	0.187294	0.947762	0.468185	-	-			1.49714	1.26382	0.265757	2.30643					1.25672	1.2383	0.293847	2.21344	-	-			1.2861	1.15071	0.174373	2.04942
P06797	Ctsl	Cathepsin L1	Ctsl					-	-	+						-	-	+		0			0	-	-			NaN	NaN	NaN	NaN									-	-	+		NaN	NaN	NaN	NaN
P08003	Pdia4	Protein disulfide-isomerase A4	Pdia4	-0.132395	0.355768	0.883001	-0.802733	-	-			0.0788752	0.255884	0.743717	0.609187	-	-			0.180947	0.270379	0.914544	0.636246	-	-			0.392216	0.61156	0.568012	1.22934					0.259822	0.386812	0.767192	0.855764	-	-			0.211302	0.658037	0.398015	1.30125
P0C0S6;Q3THW5	H2afv;H2afz	Histone H2A.Z	H2afv	-0.195266	0.23578	0.927802	-0.570302	-	-			-0.46432	0.76683	0.349245	-1.46441	-	-			-0.103027	0.113235	0.970803	-0.299776	-	-			-0.372096	0.464945	0.670061	-1.00136					-0.567348	0.633892	0.596611	-1.28066	-	-			-0.269074	0.527551	0.49319	-1.09529
P10107	Anxa1	Annexin A1	Anxa1	-0.422679	1.26292	0.557264	-2.17629	-	-			0.801793	2.96825	0.0145397	4.39288	+	-			-0.220035	0.451548	0.847977	-0.965082	-	-			1.00444	2.75594	0.0612063	4.10177	+				0.581757	1.95065	0.13244	3.04215	-	-			1.22446	3.49176	0.00417544	5.14188	+
P10417	Bcl2	Apoptosis regulator Bcl-2	Bcl2					-	-							-	-			0			0	-	-			NaN	NaN	NaN	NaN				+					-	-			0.814175	0.760612	0.337613	1.54401
P11103	Parp1	Poly [ADP-ribose] polymerase 1	Parp1	0.175717	0.360116	0.878566	0.814464	-	-			0.0400701	0.0740375	0.92316	0.202926	-	-			0.0873098	0.104475	0.974433	0.277978	-	-			-0.0483163	0.0503704	0.965074	-0.141232					0.12738	0.146634	0.911665	0.379029	-	-			-0.13564	0.2465	0.738715	-0.590343
P11276	Fn1	Fibronectin	Fn1	-0.240824	0.539519	0.789577	-1.12042	-	-			0.990013	2.65605	0.018662	3.96691	+	-			-0.542643	1.0969	0.608802	-1.9123	-	-			0.688208	1.58185	0.181565	2.56698					0.44737	0.983714	0.393191	1.77336	-	-			1.23086	3.14118	0.00596364	4.63502	+
P12265	Gusb	Beta-glucuronidase	Gusb	0.188978	0.164141	0.952473	0.420389	-	-			0.618391	0.718132	0.376277	1.41274	-	-			-0.154164	0.113227	0.970556	-0.299757	-	-			0.275263	0.205075	0.864283	0.508063					0.464227	0.341889	0.794968	0.790635	-	-			0.429398	0.485221	0.528616	1.02545
P13808	Slc4a2	Anion exchange protein 2	Slc4a2					-	-							-	-			0.00662327	0.0124031	0.999493	0.0365752	-	-			-0.339101	0.87039	0.415718	-1.78241									-	-			-0.345751	1.3838	0.113855	-2.42811
P13864	Dnmt1	DNA (cytosine-5)-methyltransferase 1	Dnmt1	0.587194	1.14306	0.572728	2.07263	-	-			0.939559	3.79336	0.00508108	6.18925	+	-			-0.485429	0.938111	0.656916	-1.70984	-	-			-0.13305	0.143247	0.911868	-0.370082					0.45413	0.61957	0.604771	1.26898	-	-			0.352338	0.794883	0.318802	1.50546
P14733	Lmnb1	Lamin-B1	Lmnb1	-0.614661	2.42422	0.458	-3.75301	-	+			0.0352056	0.12601	0.863901	0.329247	-	-			0.0115356	0.0232858	0.995544	0.0668595	-	-			0.661399	1.97296	0.118505	3.07093					0.0467412	0.10772	0.9291	0.285811	-	-			0.649842	2.44538	0.0187692	3.68632	+
P15105	Glul	Glutamine synthetase	Glul	0.259554	0.460647	0.825951	0.988503	-	-			0.138963	0.14834	0.845534	0.380725	-	-			-0.687622	0.836612	0.687281	-1.56587	-	-			-0.8082	1.25344	0.269192	-2.16338					-0.54866	0.61283	0.609605	-1.23833	-	-			-0.120586	0.162616	0.822287	-0.412811
P18654	Rps6ka3	Ribosomal protein S6 kinase alpha-3	Rps6ka3	0.25666	0.430084	0.840681	0.94061	-	-			0.085946	0.142766	0.850436	0.368979	-	-			-0.00505496	0.00642435	0.999898	-0.0188697	-	-			-0.175763	0.234369	0.841592	-0.569499					0.080891	0.0834932	0.93977	0.228353	-	-			-0.17074	0.387464	0.612976	-0.856927
P18828	Sdc1	Syndecan-1	Sdc1					-	-			0.244326	0.188904	0.807364	0.475291	-	-			0.825744	0.835237	0.685271	1.59071	-	-			NaN	NaN	NaN	NaN			+		1.07007	1.0848	0.344935	2.16886	-	-			NaN	NaN	NaN	NaN
P22437	Ptgs1	Prostaglandin G/H synthase 1	Ptgs1	-0.0131512	0.0306089	0.984507	-0.0875706	-	-			0.133422	0.219318	0.779516	0.534687	-	-			0.264643	0.325372	0.895296	0.743526	-	-			0.411217	0.657197	0.54037	1.30784					0.398065	0.695855	0.560229	1.36742	-	-			0.146552	0.220943	0.765449	0.538059
P23198	Cbx3	Chromobox protein homolog 3	Cbx3	-0.0827538	0.13576	0.96387	-0.352826	-	-			-0.47495	0.802291	0.329037	-1.51624	-	-			0.406328	0.463807	0.842261	0.985759	-	-			0.0141335	0.0125753	0.986943	0.0366002					-0.0686218	0.0626486	0.952298	-0.173164	-	-			-0.392195	0.661067	0.39573	-1.30589
P23949	Zfp36l2	mRNA decay activator protein ZFP36L2	Zfp36l2					-	-							-	-			0			0	-	-			NaN	NaN	NaN	NaN									-	-			NaN	NaN	NaN	NaN
P26039	Tln1	Talin-1	Tln1	-0.391689	1.74242	0.466543	-2.82208	-	-			0.0060542	0.0148327	0.981147	0.0430629	-	-			-0.477173	1.87378	0.410557	-2.89813	-	-			-0.0794403	0.188874	0.872493	-0.470295					-0.471119	1.9657	0.130592	-3.06156	-	-			0.397746	1.55717	0.0865144	2.53507
P27784	Ccl6	C-C motif chemokine 6	Ccl6	0.175535	0.138389	0.962236	0.358906	-	-			-1.1317	1.01817	0.230095	-1.82092	-	-			0.192248	0.126564	0.969195	0.331378	-	-			-1.11501	1.86522	0.134885	-3.05694					-0.939451	1.10537	0.339559	-1.98476	-	-			-1.30725	1.37546	0.115666	-2.29875
P28078	H2-DMa	Class II histocompatibility antigen, M alpha chain	H2-DMa	-0.966682	1.49102	0.510341	-2.77326	-	-			0.581947	0.712779	0.379188	1.40446	-	-			0.916028	1.02352	0.644034	1.86715	-	-			2.46467	2.4895	0.0733861	4.72546	+				1.49798	1.89169	0.138173	3.1885	-	-			1.54867	1.95694	0.043843	3.42617
P28271	Aco1	Cytoplasmic aconitate hydratase	Aco1	-0.0417121	0.169329	0.952494	-0.428843	-	-			-0.419989	2.4315	0.0248672	-3.668	-	+			-0.158902	0.223694	0.925531	-0.542423	-	-			-0.53719	0.953331	0.382081	-1.73112					-0.578891	1.04916	0.361538	-1.86343	-	-			-0.378276	2.17366	0.0305516	-3.3306		+
P28352	Apex1	DNA-(apurinic or apyrimidinic site) lyase	Apex1	0.0624189	0.119083	0.962958	0.313718	-	-			0.17965	0.494669	0.532328	1.04119	-	-			0.140632	0.201386	0.939618	0.495865	-	-			0.25787	0.36734	0.745954	0.82078					0.320282	0.496032	0.69048	1.04345	-	-			0.117226	0.268054	0.717977	0.63336
P28658	Atxn10	Ataxin-10	Atxn10	-0.900331	0.737788	0.708124	-1.54545	-	-			0.185353	0.261371	0.737238	0.624489	-	-			0.0952106	0.0739759	0.986009	0.204087	-	-			1.18087	0.608244	0.569332	1.35645					0.280564	0.176537	0.892217	0.458277	-	-			1.08569	1.3853	0.113807	2.43032
P29387	Gnb4	Guanine nucleotide-binding protein subunit beta-4	Gnb4	-0.392803	0.552993	0.790428	-1.18751	-	-			-0.252998	0.38838	0.626623	-0.871441	-	-			-0.402846	0.396026	0.873293	-0.879959	-	-			-0.26306	0.191179	0.871004	-0.482899					-0.655845	0.453562	0.719874	-1.02606	-	-			0.139783	0.190256	0.794931	0.474589
P35979	Rpl12	60S ribosomal protein L12	Rpl12	0.306665	0.462444	0.825196	1.00397	-	-			-0.00505052	0.00247043	0.994258	-0.00730898	-	-			1.16827	0.714021	0.743345	1.42069	-	-			0.856583	1.16647	0.298186	2.1545					1.16322	1.91837	0.139736	3.84454	-	-			-0.311745	0.216326	0.770186	-0.528459
P38060	Hmgcl	Hydroxymethylglutaryl-CoA lyase, mitochondrial	Hmgcl	-0.323029	0.218876	0.935357	-0.537252	-	-			0.0210467	0.0217085	0.975833	0.0626974	-	-			0.0480036	0.0637502	0.992192	0.176434	-	-			0.392067	0.298553	0.798308	0.697917					0.0690502	0.0539054	0.960294	0.151578	-	-			0.344052	0.345993	0.650301	0.781816
P40240	Cd9	CD9 antigen	Cd9	-0.314176	0.531502	0.793204	-1.10727	-	-			-0.55506	2.4972	0.0227674	-3.7549	-	+			-0.0453922	0.0973588	0.975937	-0.260655	-	-			-0.28625	0.439014	0.690269	-0.951248					-0.600452	1.51209	0.218184	-2.51299	-	-			-0.240859	0.515831	0.502159	-1.07612
P41245	Mmp9	Matrix metalloproteinase-9	Mmp9					-	-							-	-			-0.420868	0.294995	0.908303	-0.694562	-	-			NaN	NaN	NaN	NaN			+						-	-			NaN	NaN	NaN	NaN
P45952	Acadm	Medium-chain specific acyl-CoA dehydrogenase, mitochondrial	Acadm	-0.287612	0.555548	0.789888	-1.14655	-	-			-0.902526	2.93585	0.0148629	-4.34803	-	+			0.275549	0.559392	0.791264	1.1418	-	-			-0.339369	0.598239	0.575838	-1.20846					-0.626977	1.72154	0.167323	-2.74714	-	-			-0.614897	1.39661	0.111725	-2.32641
P48678	Lmna	Prelamin-A/C	Lmna	-0.441437	1.07597	0.586318	-1.91896	-	-			-0.378926	2.15553	0.036246	-3.30706	-	+			0.0670359	0.117247	0.972481	0.307949	-	-			0.129535	0.173924	0.886141	0.437803					-0.31189	0.658058	0.579803	-1.30128	-	-			0.0624924	0.113883	0.873804	0.300581
P49300	Clec10a	C-type lectin domain family 10 member A	Clec10a					-	-	+		0.611311	0.822149	0.318937	1.58951	-	-			-0.0352272	0.0223209	0.995211	-0.0648267	-	-			NaN	NaN	NaN	NaN			+		0.576084	0.370448	0.772373	0.885022	-	-			NaN	NaN	NaN	NaN
P49446	Ptpre	Receptor-type tyrosine-protein phosphatase epsilon	Ptpre	0.775277	0.56058	0.792321	1.26343	-	-			0.513519	1.52951	0.0972973	2.64365	-	-			0			0	-	-	+		NaN	NaN	NaN	NaN				+					-	-	+		-0.261777	0.280482	0.70617	-0.66587
P49586	Pcyt1a	Choline-phosphate cytidylyltransferase A	Pcyt1a	0.213133	0.337507	0.889449	0.772328	-	-			-0.0412833	0.105845	0.883262	-0.281978	-	-			-0.203134	0.775323	0.71726	-1.48736	-	-			-0.45758	0.905762	0.406238	-1.69542					-0.244417	0.623235	0.602812	-1.27496	-	-			-0.254429	0.574459	0.457852	-1.17084
P50580	Pa2g4	Proliferation-associated protein 2G4	Pa2g4	-0.500842	1.38026	0.518472	-2.33544	-	-			0.199732	0.535216	0.497559	1.10777	-	-			0.0312143	0.0644243	0.991963	0.177423	-	-			0.731788	2.32899	0.0834769	3.53322	+				0.230946	0.446651	0.723716	0.960253	-	-			0.700559	3.58918	0.00415686	5.28693	+
P51912	Slc1a5	Neutral amino acid transporter B(0)	Slc1a5	-0.0110649	0.0166398	0.991044	-0.0486251	-	-			-0.183885	0.250614	0.749023	-0.600482	-	-			-0.374867	0.39333	0.875216	-0.870828	-	-			-0.5477	0.621727	0.562446	-1.2725					-0.558752	0.571526	0.637801	-1.18987	-	-			-0.17282	0.278022	0.709207	-0.655071
P53808	Pctp	Phosphatidylcholine transfer protein	Pctp	0.0534878	0.0732887	0.97082	0.20232	-	-			-0.494253	0.769973	0.347298	-1.5086	-	-			0			0	-	-			NaN	NaN	NaN	NaN				+					-	-			-0.547717	0.9617	0.240488	-1.75821
P57759	Erp29	Endoplasmic reticulum resident protein 29	Erp29	-0.377679	0.470731	0.822506	-1.01133	-	-			0.0177761	0.0230256	0.975085	0.0664071	-	-			0.053921	0.0774006	0.985659	0.210569	-	-			0.449345	0.673576	0.529354	1.32498					0.0716971	0.11156	0.928085	0.29576	-	-			0.395431	0.540171	0.484563	1.1158
P59759	Mkl2	MKL/myocardin-like protein 2	Mkl2	0.470979	0.52737	0.794691	1.11577	-	-			0.165987	0.248481	0.750923	0.594335	-	-			0.148186	0.195381	0.943798	0.484253	-	-			-0.156817	0.131178	0.920193	-0.344568					0.314173	0.361096	0.778302	0.81251	-	-			-0.304986	0.447015	0.56177	-0.970276
P62071	Rras2	Ras-related protein R-Ras2	Rras2	0.744054	0.344163	0.884954	0.802765	-	-			-0.036304	0.0345475	0.9625	-0.099053	-	-			-0.039526	0.0481188	0.991939	-0.136695	-	-			-0.8199	0.339541	0.770592	-0.804627					-0.07583	0.0641618	0.950691	-0.1821	-	-			-0.780366	0.507363	0.510557	-1.0817
P62631	Eef1a2	Elongation factor 1-alpha 2	Eef1a2	0.508077	0.370244	0.872669	0.833107	-	-			-0.556895	0.331797	0.674485	-0.758236	-	-			1.51139	0.785625	0.712458	1.53297	-	-			0.446434	0.215521	0.855102	0.535625					0.954495	0.381008	0.771107	0.873647	-	-			-1.06495	1.02502	0.214325	-1.83034
P63254	Crip1	Cysteine-rich protein 1	Crip1	-0.523066	0.966273	0.626397	-1.76471	-	-			-1.35785	4.24613	0.00362791	-6.3204	-	+			0.619973	1.85528	0.412554	2.87519	-	-			-0.214805	0.326584	0.779155	-0.745794					-0.737877	2.10696	0.11529	-3.24408	-	+			-0.834777	1.9187	0.0458258	-3.00097
P63328	Ppp3ca	Serine/threonine-protein phosphatase 2B catalytic subunit alpha isoform	Ppp3ca	-0.277455	0.973912	0.621628	-1.77555	-	-			0.116903	0.493183	0.533436	1.03872	-	-			-0.328901	0.636231	0.76376	-1.26155	-	-			0.0654522	0.0810902	0.942954	0.220293					-0.211998	0.330594	0.802547	-0.753284	-	-			0.394352	1.66537	0.0717083	2.67478
P68368	Tuba4a	Tubulin alpha-4A chain	Tuba4a	-0.444789	0.579452	0.78545	-1.18515	-	-			-0.0953271	0.209697	0.789071	-0.514582	-	-			-0.407903	0.76666	0.720552	-1.4557	-	-			-0.0584597	0.049581	0.965413	-0.138807					-0.50323	0.965835	0.401827	-1.74854	-	-			0.349469	0.454424	0.555925	0.973519
P70175	Dlg3	Disks large homolog 3	Dlg3	0.226023	0.335509	0.888498	0.772838	-	-			-0.557064	1.30849	0.141657	-2.27267	-	-			-0.11992	0.158224	0.959733	-0.405379	-	-			-0.902992	1.51744	0.191502	-2.62575					-0.676984	0.876333	0.45791	-1.73764	-	-			-0.783081	2.26918	0.0262347	-3.455		+
P70255	Nfic	Nuclear factor 1 C-type	Nfic					-	-			-0.326654	0.414214	0.602176	-0.92594	-	-			0			0	-	-			NaN	NaN	NaN	NaN									-	-			NaN	NaN	NaN	NaN
P70271	Pdlim4	PDZ and LIM domain protein 4	Pdlim4	-0.260409	0.307908	0.8969	-0.713007	-	-			-0.328392	0.617171	0.441447	-1.2381	-	-			-0.0316533	0.0522777	0.992187	-0.145966	-	-			-0.0996497	0.116014	0.92404	-0.306416					-0.360046	0.577665	0.633155	-1.18228	-	-			-0.0679716	0.0883027	0.897347	-0.238321
P81122	Irs2	Insulin receptor substrate 2	Irs2					-	-							-	-			0			0	-	-			NaN	NaN	NaN	NaN				+					-	-			-0.4407	0.185193	0.799572	-0.485306
P84091	Ap2m1	AP-2 complex subunit mu	Ap2m1	0.342847	0.545753	0.789921	1.13061	-	-			0.809835	1.95734	0.0492632	3.05078	-	-			-0.606725	1.02287	0.642938	-1.81322	-	-			-0.139767	0.145485	0.91193	-0.374233					0.203111	0.193109	0.882032	0.479393	-	-			0.46699	1.66672	0.0717122	2.67652
P97302	Bach1	Transcription regulator protein BACH1	Bach1	-0.073686	0.0519431	0.979419	-0.151017	-	-			0.877282	1.11331	0.195346	2.22097	-	-			-0.426558	0.557046	0.79089	-1.21874	-	-			0.524366	0.529428	0.622982	1.20242					0.450724	0.318665	0.812044	0.777841	-	-			0.950917	2.02373	0.03881	4.08769	+
P97429	Anxa4	Annexin A4	Anxa4	0.00380135	0.0109824	0.990849	0.0320933	-	-			-0.345938	1.12481	0.192396	-1.96616	-	-			-0.0104986	0.0129794	0.999142	-0.0376882	-	-			-0.360243	0.681525	0.52492	-1.33706					-0.356436	0.694587	0.560876	-1.35682	-	-			-0.349743	1.06272	0.202723	-1.88194
P97449	Anpep	Aminopeptidase N	Anpep	-0.067297	0.288819	0.905427	-0.676184	-	-			-0.0273851	0.0625613	0.934236	-0.172937	-	-			-0.0223152	0.0310197	0.993931	-0.0883374	-	-			0.0175955	0.0252999	0.982576	0.0726238					-0.0497002	0.0731428	0.946243	-0.200169	-	-			0.0398954	0.100449	0.885612	0.268201
P97499	Tep1	Telomerase protein component 1	Tep1	0.359901	0.446193	0.836674	0.968842	-	-			0.255441	0.405241	0.610665	0.892037	-	-			-0.39051	0.452931	0.847429	-0.970975	-	-			-0.494983	0.493416	0.649369	-1.04402					-0.135069	0.0943279	0.936344	-0.254578	-	-			-0.104486	0.164718	0.819808	-0.417484
P97742	Cpt1a	Carnitine O-palmitoyltransferase 1, liver isoform	Cpt1a	0.0761995	0.10855	0.963751	0.288517	-	-			-0.0387934	0.0837052	0.910772	-0.226854	-	-			-0.137434	0.192783	0.945572	-0.477579	-	-			-0.252431	0.305999	0.792863	-0.706934					-0.176227	0.208098	0.870762	-0.511221	-	-			-0.115002	0.246606	0.73892	-0.590555
P97855	G3bp1	Ras GTPase-activating protein-binding protein 1	G3bp1	-0.392045	0.884068	0.647474	-1.64691	-	-			0.164876	0.386214	0.628174	0.854698	-	-			0.102742	0.10974	0.972214	0.290072	-	-			0.659657	0.899075	0.408539	1.65493					0.267617	0.288543	0.822162	0.673412	-	-			0.5569	1.80189	0.0563476	2.85058
Q00560	Il6st	Interleukin-6 receptor subunit beta	Il6st					-	-							-	-			0.0363272	0.0507988	0.992228	0.143279	-	-			0.8078	1.50648	0.195482	3.25749									-	-			0.771486	2.18841	0.0299443	3.65151	+
Q02248	Ctnnb1	Catenin beta-1	Ctnnb1	0.259581	0.443997	0.838411	0.959874	-	-			-0.114593	0.163216	0.8319	-0.414147	-	-			-0.540288	0.599834	0.770177	-1.20539	-	-			-0.914455	1.10408	0.319961	-1.93814					-0.654881	0.678021	0.572688	-1.33174	-	-			-0.374169	0.834196	0.299456	-1.56239
Q08857	Cd36	Platelet glycoprotein 4	Cd36	-0.638829	0.825165	0.687174	-1.6186	-	-			-0.219659	0.333258	0.674164	-0.768554	-	-			-0.626127	0.743373	0.730899	-1.4516	-	-			-0.20696	0.154037	0.905818	-0.397497					-0.845786	0.984031	0.393328	-1.86956	-	-			0.41916	0.501893	0.513606	1.06444
Q09200	B4galnt1	Beta-1,4 N-acetylgalactosaminyltransferase 1	B4galnt1					-	-			0.900594	0.974508	0.248686	1.79609	-	-			0.0691253	0.0587906	0.990901	0.163951	-	-			NaN	NaN	NaN	NaN			+		0.969719	0.871277	0.456602	1.72922	-	-			NaN	NaN	NaN	NaN
Q32NY4	Cnnm3	Metal transporter CNNM3	Cnnm3					-	-			0.676168	2.28666	0.0303464	3.80924	+	-			0			0	-	-			NaN	NaN	NaN	NaN									-	-			NaN	NaN	NaN	NaN
Q3TB82	Plekhf1	Pleckstrin homology domain-containing family F member 1	Plekhf1					-	-							-	-			0			0	-	-			NaN	NaN	NaN	NaN				+					-	-			0.15231	0.130934	0.855992	0.345711
Q3TEA8	Hp1bp3	Heterochromatin protein 1-binding protein 3	Hp1bp3	-0.2517	0.66805	0.740115	-1.32466	-	-			0.0826552	0.273437	0.726163	0.64396	-	-			0.205572	0.658726	0.755044	1.29579	-	-			0.539905	1.59295	0.18012	2.58132					0.288227	0.718979	0.546	1.39346	-	-			0.334333	1.55459	0.0867903	2.53173
Q3TIU4	Pde12	2',5'-phosphodiesterase 12	Pde12					-	-							-	-			0			0	-	-			NaN	NaN	NaN	NaN				+					-	-			0.0393536	0.0151201	0.977312	0.0447173
Q3TWW8	Srsf6	Serine/arginine-rich splicing factor 6	Srsf6	-0.465432	1.09497	0.584035	-1.9454	-	-			0.178531	1.0066	0.233711	1.80499	-	-			0.0787078	0.238505	0.927117	0.572696	-	-			0.722669	1.86309	0.134455	2.92937					0.257239	1.00433	0.382834	1.80186	-	-			0.643984	1.81891	0.0548239	2.8725
Q3UHC7	Dab2ip	Disabled homolog 2-interacting protein	Dab2ip	0.0869911	0.0759355	0.970251	0.209116	-	-			-0.194674	0.190583	0.805585	-0.475295	-	-			0			0	-	-			NaN	NaN	NaN	NaN				+					-	-			-0.281648	0.259783	0.726168	-0.618908
Q3USJ8	Fchsd2	F-BAR and double SH3 domains protein 2	Fchsd2					-	-							-	-		+	0			0	-	-	+		NaN	NaN	NaN	NaN									-	-			NaN	NaN	NaN	NaN
Q3UV70	Pdp1	[Pyruvate dehydrogenase [acetyl-transferring]]-phosphatase 1, mitochondrial	Pdp1	0.334142	0.420923	0.843008	0.930404	-	-			-0.199566	0.308142	0.695134	-0.720245	-	-			-1.14362	2.35246	0.465833	-3.76631	-	+			-1.67729	2.88836	0.0609796	-4.59859		+			-1.34319	1.70999	0.168525	-3.0159	-	-			-0.533699	1.33403	0.12446	-2.27291
Q3V3Q7	Pacs2	Phosphofurin acidic cluster sorting protein 2	Pacs2	-0.531865	0.171463	0.952175	-0.453337	-	-			-0.229263	0.151802	0.843045	-0.400954	-	-			0			0	-	-			NaN	NaN	NaN	NaN				+					-	-			0.302617	0.101983	0.885132	0.279977
Q3V3R4	Itga1	Integrin alpha-1	Itga1	-0.245361	0.530243	0.793465	-1.1052	-	-			-0.107483	0.253652	0.745591	-0.60472	-	-			-0.190838	0.56848	0.785721	-1.15621	-	-			-0.0529714	0.096206	0.936133	-0.25783					-0.29832	0.852997	0.462988	-1.58938	-	-			0.137886	0.303458	0.685463	0.702086
Q5M8N0	Cnrip1	CB1 cannabinoid receptor-interacting protein 1	Cnrip1	-0.440909	0.397084	0.855906	-0.917883	-	-			0.335242	0.938961	0.264392	1.76769	-	-			0			0	-	-			NaN	NaN	NaN	NaN				+					-	-			0.776166	1.21186	0.155746	2.22529
Q5SW19	Cluh	Clustered mitochondria protein homolog	Cluh	0.0481685	0.125079	0.961526	0.327889	-	-			0.0934781	0.308595	0.69453	0.711872	-	-			0.0538692	0.0736371	0.985496	0.201033	-	-			0.0991879	0.129995	0.920258	0.338556					0.147347	0.208116	0.871306	0.511259	-	-			0.045302	0.122161	0.866038	0.320206
Q5SWD9	Tsr1	Pre-rRNA-processing protein TSR1 homolog	Tsr1	-0.238234	0.213931	0.937956	-0.536304	-	-			0.453255	0.84167	0.310651	1.60033	-	-			0			0	-	-			NaN	NaN	NaN	NaN				+					-	-			0.691493	1.88296	0.0489627	3.08222
Q5SYD0	Myo1d	Unconventional myosin-Id	Myo1d	-0.0600274	0.256679	0.924393	-0.612688	-	-			-0.432625	1.20692	0.167371	-2.07626	-	-			0.268154	0.40423	0.871066	0.883642	-	-			-0.104443	0.150313	0.907944	-0.385196					-0.164471	0.253125	0.84186	-0.603666	-	-			-0.372585	1.00508	0.22323	-1.80289
Q60598	Cttn	Src substrate cortactin	Cttn	-0.243026	0.600387	0.775868	-1.2186	-	-			-0.150155	1.15847	0.181124	-2.01145	-	-			-0.0112	0.0257399	0.995179	-0.0737121	-	-			0.0816525	0.13375	0.918763	0.347278					-0.161355	0.465562	0.711461	-0.992413	-	-			0.0928816	0.203085	0.780962	0.500638
Q60664	Lrmp	Lymphoid-restricted membrane protein	Lrmp	-0.946139	1.41224	0.509865	-3.032	-	-			-0.0907253	0.107254	0.881808	-0.288704	-	-			-0.209029	0.297066	0.908095	-0.703294	-	-			0.6464	1.12463	0.318036	2.3914					-0.299754	0.545344	0.657612	-1.23362	-	-			0.85545	1.47781	0.0971153	2.64295
Q60790	Rasa3	Ras GTPase-activating protein 3	Rasa3	0.113378	0.110527	0.964026	0.298615	-	-			0.67943	0.582303	0.46144	1.20775	-	-			0.0129797	0.00732931	1	0.0215653	-	-			0.57901	0.491438	0.650651	1.0643					0.692409	0.526695	0.672131	1.16283	-	-			0.566045	0.567144	0.461899	1.16533
Q60793	Klf4	Krueppel-like factor 4	Klf4					-	-							-	-			0			0	-	-			NaN	NaN	NaN	NaN									-	-			NaN	NaN	NaN	NaN
Q60994	Adipoq	Adiponectin	Adipoq	0.369682	0.472981	0.824546	1.00952	-	-			-0.134727	0.135491	0.857305	-0.351305	-	-			-0.217432	0.186196	0.948854	-0.463452	-	-			-0.72185	0.803215	0.450558	-1.51759					-0.352159	0.282614	0.82863	-0.661903	-	-			-0.504436	0.916141	0.260386	-1.679
Q60996	Ppp2r5c	Serine/threonine-protein phosphatase 2A 56 kDa regulatory subunit gamma isoform	Ppp2r5c	0.657876	0.364448	0.875438	0.872732	-	-			-0.0618477	0.0454467	0.954111	-0.129448	-	-			-0.0314484	0.0260835	0.995173	-0.0757877	-	-			-0.751167	0.495569	0.648272	-1.13582					-0.0932961	0.079671	0.942639	-0.225843	-	-			-0.7197	0.587434	0.448555	-1.22962
Q61176	Arg1	Arginase-1	Arg1	-0.584323	0.344514	0.885028	-0.814556	-	-			0.543782	0.330929	0.674693	0.764114	-	-			-0.0674615	0.0322586	0.993985	-0.092131	-	-			1.06065	0.588493	0.582906	1.2314					0.476321	0.16242	0.900208	0.421626	-	-			1.12812	1.30191	0.132941	2.2634
Q61193	Rgl2	Ral guanine nucleotide dissociation stimulator-like 2	Rgl2	-1.20244	1.13845	0.571399	-2.2671	-	-			-0.602463	0.723441	0.373226	-1.45484	-	-			0.406231	0.423999	0.857725	0.943787	-	-			1.00619	0.894452	0.409135	1.82545					-0.196232	0.257061	0.843561	-0.646343	-	-			0.599975	0.605496	0.434998	1.24596
Q61263	Soat1	Sterol O-acyltransferase 1	Soat1	0.188244	0.0715347	0.970545	0.197799	-	-			0.490102	0.318053	0.68509	0.744561	-	-			0			0	-	-			NaN	NaN	NaN	NaN				+					-	-			0.301867	0.135744	0.850566	0.35389
Q61425	Hadh	Hydroxyacyl-coenzyme A dehydrogenase, mitochondrial	Hadh	-0.671767	1.33673	0.546987	-2.27657	-	-			-1.62038	6.17067	0	-10.0913	-	+			0.200335	0.23525	0.926788	0.566085	-	-			-0.74827	0.924907	0.395248	-1.69133					-1.42005	2.62605	0.0903226	-3.92666	-	+			-0.948597	2.03365	0.0385328	-3.14925		+
Q61753	Phgdh	D-3-phosphoglycerate dehydrogenase	Phgdh	-0.191759	0.346859	0.884005	-0.786294	-	-			0.737898	3.00905	0.0142921	4.44958	+	-			-0.213764	0.390036	0.875465	-0.861507	-	-			0.715916	1.32885	0.24291	2.26588					0.524134	1.25076	0.291807	2.15972	-	-			0.929648	2.47984	0.0174743	3.73189	+
Q61823	Pdcd4	Programmed cell death protein 4	Pdcd4	-0.290868	0.817066	0.689155	-1.54917	-	-			-0.322171	0.825327	0.317657	-1.54961	-	-			-0.131758	0.115154	0.971528	-0.303612	-	-			-0.16305	0.138102	0.91612	-0.358243					-0.453929	0.473098	0.709161	-1.00972	-	-			-0.0312975	0.0513976	0.935239	-0.143633
Q62165	Dag1	Dystroglycan	Dag1	-0.179096	0.34348	0.885505	-0.780029	-	-			-0.264691	0.88768	0.289952	-1.63879	-	-			-0.101829	0.114316	0.971421	-0.300993	-	-			-0.187426	0.192508	0.870764	-0.478105					-0.366519	0.453985	0.719843	-0.972771	-	-			-0.0855833	0.175013	0.809534	-0.440191
Q62172	Ralbp1	RalA-binding protein 1	Ralbp1					-	-			0.651108	0.357521	0.651984	0.820425	-	-			0			0	-	-			NaN	NaN	NaN	NaN									-	-			NaN	NaN	NaN	NaN
Q62179	Sema4b	Semaphorin-4B	Sema4b	0.336801	0.320275	0.893584	0.74889	-	-			-0.195299	0.224304	0.773485	-0.548609	-	-			-0.0100232	0.00658788	1	-0.0194	-	-			-0.542115	0.372114	0.745672	-0.847949					-0.205322	0.126476	0.92036	-0.337339	-	-			-0.532097	0.658243	0.397963	-1.30947
Q62351	Tfrc	Transferrin receptor protein 1	Tfrc	0.277649	0.455846	0.828349	0.992394	-	-			1.82675	4.53722	0.00224	7.73216	+	-			-0.653414	1.46511	0.497283	-2.38787	-	-			0.895685	1.84728	0.135883	2.90901					1.17334	2.35101	0.102248	3.76414	+	-			1.5491	4.00817	0.00141538	5.9342	+
Q62465	Vat1	Synaptic vesicle membrane protein VAT-1 homolog	Vat1	0.304346	0.3159	0.89354	0.740359	-	-			0.235478	0.321709	0.682338	0.746461	-	-			-0.45212	0.533726	0.800848	-1.12652	-	-			-0.520995	0.484801	0.656974	-1.05262					-0.216642	0.179809	0.891958	-0.461076	-	-			-0.0688538	0.070576	0.917041	-0.194624
Q63943	Mef2d	Myocyte-specific enhancer factor 2D	Mef2d					-	-			0.932747	2.49051	0.0226934	4.72771	+	-			0			0	-	-			NaN	NaN	NaN	NaN									-	-			NaN	NaN	NaN	NaN
Q64685	St6gal1	Beta-galactoside alpha-2,6-sialyltransferase 1	St6gal1	-0.296465	0.244029	0.929626	-0.5957	-	-							-	-			0			0	-	-			NaN	NaN	NaN	NaN				+					-	-			NaN	NaN	NaN	NaN
Q64727	Vcl	Vinculin	Vcl	-0.250478	0.592332	0.781377	-1.20576	-	-			0.0389719	0.0854135	0.908533	0.231125	-	-			-0.500974	1.86379	0.40852	-2.88575	-	-			-0.211531	0.477729	0.661718	-1.0129					-0.462002	1.44585	0.228851	-2.39062	-	-			0.289441	0.828239	0.30283	1.55381
Q6DFW4	Nop58	Nucleolar protein 58	Nop58	-0.0476122	0.0342866	0.982653	-0.0987722	-	-			0.0624236	0.0790554	0.916329	0.216303	-	-			-0.30203	0.321444	0.896861	-0.738747	-	-			-0.19198	0.126974	0.921186	-0.334652					-0.239606	0.153711	0.907896	-0.398806	-	-			0.110029	0.134743	0.850853	0.350467
Q6NT99	Dusp23	Dual specificity protein phosphatase 23	Dusp23	0.270075	0.279294	0.910552	0.663506	-	-			-0.822051	0.577626	0.46468	-1.2	-	-			0			0	-	-	+		NaN	NaN	NaN	NaN				+					-	-	+		-1.09212	1.25194	0.14479	-2.16133
Q6P5G3	Mbtd1	MBT domain-containing protein 1	Mbtd1					-	-							-	-			0			0	-	-			NaN	NaN	NaN	NaN									-	-			NaN	NaN	NaN	NaN
Q6P5H2	Nes	Nestin	Nes	0.233433	0.214209	0.938272	0.529779	-	-			0.212116	0.206548	0.790281	0.513446	-	-			0.164001	0.103773	0.975444	0.276953	-	-			0.142684	0.0871214	0.939865	0.235947					0.376117	0.212334	0.865671	0.525794	-	-			-0.0213159	0.0191693	0.972557	-0.055516
Q6P9S7	Galnt10	Polypeptide N-acetylgalactosaminyltransferase 10	Galnt10	0.452533	0.476332	0.822278	1.03766	-	-			-0.572853	0.361492	0.648395	-0.836305	-	-			0			0	-	-			NaN	NaN	NaN	NaN				+					-	-			-1.02535	0.980064	0.232783	-1.80417
Q6PD10	Ip6k1	Inositol hexakisphosphate kinase 1	Ip6k1					-	-							-	-		+	0			0	-	-	+		NaN	NaN	NaN	NaN									-	-			NaN	NaN	NaN	NaN
Q6PDY2	Ado	2-aminoethanethiol dioxygenase	Ado	-0.235625	0.300473	0.90063	-0.698739	-	-			0.0999318	0.167088	0.828596	0.422739	-	-			-0.251896	0.570803	0.782246	-1.17123	-	-			0.0836768	0.0920279	0.937875	0.248875					-0.151964	0.176817	0.892418	-0.446834	-	-			0.335588	0.752443	0.343129	1.4432
Q6PGB6	Naa50	N-alpha-acetyltransferase 50	Naa50	0.295077	0.502724	0.812917	1.07375	-	-			-0.0164018	0.0468116	0.953397	-0.132091	-	-			-0.799389	1.21129	0.587518	-2.08209	-	-			-1.11087	1.44096	0.211153	-2.41731					-0.81579	0.82081	0.480284	-1.58744	-	-			-0.311486	0.763683	0.336462	-1.45978
Q71FD5	Znrf2	E3 ubiquitin-protein ligase ZNRF2	Znrf2	0.208031	0.131205	0.962577	0.344631	-	-			0.354956	0.551659	0.485922	1.1567	-	-			0.164925	0.259627	0.91688	0.620981	-	-			0.31185	0.243056	0.835913	0.587354					0.519882	0.641275	0.590766	1.31983	-	-			0.146934	0.121855	0.866114	0.320286
Q7SIG6	Asap2	Arf-GAP with SH3 domain, ANK repeat and PH domain-containing protein 2	Asap2	-1.17674	1.591	0.490923	-2.61893	-	-			-1.1326	1.71974	0.0716806	-2.74483	-	-			0.963822	1.16169	0.597154	1.99785	-	-			1.00797	1.09171	0.321847	1.92137					-0.168775	0.106285	0.928473	-0.282352	-	-			0.0441431	0.0532962	0.933436	0.14866
Q7TN05	Ap1s3	AP-1 complex subunit sigma-3	Ap1s3	-0.431448	0.649973	0.749581	-1.35607	-	-			-1.45449	2.07758	0.0411682	-3.63304	-	+			0			0	-	-			NaN	NaN	NaN	NaN				+					-	-			-1.02305	1.1518	0.173879	-2.13161
Q7TN29	Smap2	Stromal membrane-associated protein 2	Smap2	0.12478	0.0765998	0.970676	0.210816	-	-			0.154201	0.161719	0.833251	0.413248	-	-			0.833903	1.18504	0.592962	2.09821	-	-			0.863299	0.709894	0.507768	1.41416					0.988104	0.903827	0.439536	1.7834	-	-			0.0293927	0.0236082	0.968715	0.0678904
Q7TSJ2	Map6	Microtubule-associated protein 6	Map6	0.204665	0.248663	0.929621	0.601631	-	-			0.0322245	0.0427195	0.955007	0.121466	-	-			-0.309204	0.414294	0.8661	-0.912658	-	-			-0.481657	0.610084	0.568751	-1.24258					-0.276979	0.298863	0.817382	-0.706855	-	-			-0.172434	0.240568	0.743535	-0.580095
Q80UK0	Sestd1	SEC14 domain and spectrin repeat-containing protein 1	Sestd1	-0.6259	0.606947	0.772877	-1.35392	-	-			-0.145842	0.451998	0.571841	-1.00614	-	-			0			0	-	-			NaN	NaN	NaN	NaN				+					-	-			0.480099	0.676808	0.386085	1.40201
Q80UP3	Dgkz	Diacylglycerol kinase zeta	Dgkz	0.327862	0.235958	0.928616	0.590037	-	-			-0.0799571	0.0778241	0.917728	-0.216272	-	-			0			0	-	-			NaN	NaN	NaN	NaN				+					-	-			-0.407815	0.406761	0.597501	-0.912277
Q80UW8	Polr2e	DNA-directed RNA polymerases I, II, and III subunit RPABC1	Polr2e	-0.275346	1.02671	0.599259	-1.89953	-	-			0.151324	0.356431	0.652401	0.803952	-	-			-0.249423	0.327357	0.895595	-0.74724	-	-			0.17724	0.192013	0.870616	0.480013					-0.0980994	0.0983473	0.934632	-0.264494	-	-			0.426654	1.35435	0.120402	2.30041
Q80YQ8	Rmnd5a	E3 ubiquitin-protein ligase RMND5A	Rmnd5a	0.616406	0.466817	0.825509	1.03322	-	-			0.182445	0.215854	0.782339	0.533268	-	-			0			0	-	-			NaN	NaN	NaN	NaN				+					-	-			-0.433958	0.45388	0.556309	-0.988936
Q810D6	Grwd1	Glutamate-rich WD repeat-containing protein 1	Grwd1	-0.440395	0.275857	0.912429	-0.666555	-	-			0.856027	3.12242	0.0117576	5.27102	+	-			-0.195197	0.735437	0.736431	-1.43941	-	-			1.10122	1.04457	0.342737	1.96429					0.66083	2.24446	0.106229	4.62769	+	-			1.29641	1.93623	0.0450116	3.08299
Q8BGI5	Pex26	Peroxisome assembly protein 26	Pex26					-	-							-	-		+	0			0	-	-	+		NaN	NaN	NaN	NaN									-	-			NaN	NaN	NaN	NaN
Q8BGR6	Arl15	ADP-ribosylation factor-like protein 15	Arl15					-	-	+		0.681724	1.16789	0.178413	2.22278	-	-			0			0	-	-	+		NaN	NaN	NaN	NaN									-	-	+		NaN	NaN	NaN	NaN
Q8BH95	Echs1	Enoyl-CoA hydratase, mitochondrial	Echs1	-0.505517	0.845144	0.671128	-1.59034	-	-			-0.687353	2.11686	0.0386154	-3.25691	-	+			-0.514416	0.484133	0.832396	-1.01969	-	-			-0.69624	0.58741	0.582921	-1.19138					-1.20177	1.30613	0.27243	-2.2077	-	-			-0.181826	0.254754	0.732639	-0.606927
Q8BHD8	Pcmtd2	Protein-L-isoaspartate O-methyltransferase domain-containing protein 2	Pcmtd2	-0.564963	0.376959	0.868243	-0.865937	-	-			0.427517	0.51914	0.509668	1.11268	-	-			0			0	-	-			NaN	NaN	NaN	NaN				+					-	-			0.992484	1.02189	0.215337	1.92884
Q8BHJ5	Tbl1xr1	F-box-like/WD repeat-containing protein TBL1XR1	Tbl1xr1	0.334311	0.281654	0.909979	0.67254	-	-			0.121645	0.158118	0.836249	0.406781	-	-			0.21792	0.184317	0.950489	0.467777	-	-			0.00527267	0.0025946	0.993306	0.00778159					0.339565	0.243598	0.84733	0.606453	-	-			-0.21266	0.208058	0.777258	-0.514411
Q8BJ56	Pnpla2	Patatin-like phospholipase domain-containing protein 2	Pnpla2					-	-							-	-			0			0	-	-			NaN	NaN	NaN	NaN									-	-			NaN	NaN	NaN	NaN
Q8BKS9	Pum3	Pumilio homolog 3	Pum3	1.0428	0.723257	0.715058	1.51943	-	-			1.53081	3.99082	0.004	7.09857	+	-			-0.0417732	0.0684147	0.989527	-0.189047	-	-			0.446199	0.31176	0.788	0.739					1.48904	2.54347	0.0933151	5.43466	+	-			0.487992	0.522773	0.496557	1.09954
Q8BMK4	Ckap4	Cytoskeleton-associated protein 4	Ckap4	-0.185461	0.894432	0.648324	-1.66189	-	-			0.987206	3.99401	0.00406897	5.91167	+	-			-0.689483	1.76597	0.406123	-2.76434	-	-			0.483188	1.17917	0.291398	2.0392					0.297723	0.628633	0.598591	1.25593	-	-			1.17264	4.65967	0.000421053	7.0276	+
Q8BNU0	Armc6	Armadillo repeat-containing protein 6	Armc6					-	-			0.360535	0.232936	0.763594	0.572527	-	-			0			0	-	-			NaN	NaN	NaN	NaN									-	-			NaN	NaN	NaN	NaN
Q8BVI4	Qdpr	Dihydropteridine reductase	Qdpr	0.447312	0.215851	0.937428	0.529004	-	-			-0.233354	0.11595	0.870704	-0.305507	-	-			0.873092	1.42262	0.509862	2.43309	-	-			0.192433	0.173087	0.886092	0.440415					0.639738	0.273698	0.834996	0.652333	-	-			-0.68066	0.90674	0.264112	-1.66575
Q8BYW1	Arhgap25	Rho GTPase-activating protein 25	Arhgap25					-	-							-	-			0			0	-	-			NaN	NaN	NaN	NaN									-	-			NaN	NaN	NaN	NaN
Q8C0D4	Arhgap12	Rho GTPase-activating protein 12	Arhgap12	-0.428107	0.260004	0.920751	-0.628645	-	-			-1.27421	1.1539	0.182913	-2.08869	-	-			0.936669	0.67528	0.752245	1.37606	-	-			0.09058	0.0412379	0.972273	0.118664					-0.337539	0.272957	0.835332	-0.668575	-	-			-0.846104	0.605547	0.435102	-1.23528
Q8C3J5	Dock2	Dedicator of cytokinesis protein 2	Dock2					-	-							-	-			-0.0579814	0.0409554	0.991418	-0.11625	-	-			NaN	NaN	NaN	NaN			+						-	-			NaN	NaN	NaN	NaN
Q8C6B0	Mettl7a1	MCG20149, isoform CRA_a	Mettl7a1	-0.765529	1.05339	0.597923	-1.88745	-	-			-1.0954	3.77052	0.00517333	-5.56223	-	+			0.385606	0.934284	0.654683	1.70448	-	-			0.0557671	0.0468195	0.96717	0.131741					-0.709794	2.1511	0.10795	-3.37502	-	+			-0.329854	0.380291	0.617798	-0.844107
Q8C6G8	Wdr26	WD repeat-containing protein 26	Wdr26	0.627064	0.899606	0.64984	1.70805	-	-			0.756677	2.11899	0.0384277	3.42204	+	-			-0.563932	1.93348	0.412585	-3.07926	-	-			-0.434346	0.694402	0.515772	-1.37592					0.192745	0.390064	0.763787	0.881449	-	-			0.129591	0.184041	0.800908	0.459857
Q8C7K6	Pcyox1l	Prenylcysteine oxidase-like	Pcyox1l	0.142914	0.124363	0.960554	0.332257	-	-			0.794519	1.39737	0.122105	2.61126	-	-			0			0	-	-			NaN	NaN	NaN	NaN				+					-	-			0.6516	0.994084	0.226991	1.93335
Q8CBH5	Mfsd6	Major facilitator superfamily domain-containing protein 6	Mfsd6					-	-			-0.395405	0.881757	0.292607	-1.68088	-	-			0			0	-	-			NaN	NaN	NaN	NaN									-	-			NaN	NaN	NaN	NaN
Q8CHP8	Pgp	Glycerol-3-phosphate phosphatase	Pgp	-0.395369	0.92503	0.638119	-1.70588	-	-			-0.376567	1.11332	0.195474	-1.95064	-	-			-0.060554	0.0911249	0.978038	-0.244826	-	-			-0.0417735	0.0528005	0.962885	-0.147349					-0.437121	1.10244	0.340949	-1.93592	-	-			0.0188124	0.0253858	0.967179	0.0728638
Q8CHY6	Gatad2a	Transcriptional repressor p66 alpha	Gatad2a	-0.292542	0.282073	0.911468	-0.669033	-	-			0.434161	0.648318	0.420388	1.29403	-	-			-0.499434	1.17369	0.595301	-2.0542	-	-			0.22726	0.285263	0.808548	0.675363					-0.0652729	0.04922	0.965204	-0.139043	-	-			0.726677	2.36838	0.0217216	3.67498	+
Q8CIZ8	Vwf	von Willebrand factor	Vwf	0.283563	0.395125	0.857577	0.883762	-	-			1.09259	3.28848	0.00926619	5.59261	+	-			-0.938056	1.38307	0.510076	-2.37756	-	-			-0.12906	0.10638	0.933324	-0.284123					0.154537	0.118564	0.925821	0.316175	-	-			0.809033	1.92778	0.0455369	3.07157
Q8K0J2	B3gnt7	UDP-GlcNAc:betaGal beta-1,3-N-acetylglucosaminyltransferase 7	B3gnt7	-0.00176382	0.00166893	0.993681	-0.00498129	-	-			-0.626986	0.461525	0.563025	-0.99546	-	-			1.19091	0.782831	0.712862	1.52863	-	-			0.565714	0.495346	0.647899	1.08487					0.563928	0.447794	0.7222	1.01513	-	-			-0.625234	0.524311	0.495867	-1.09542
Q8K0Q5	Arhgap18	Rho GTPase-activating protein 18	Arhgap18	-0.387705	1.33912	0.545768	-2.42431	-	-			-0.43231	0.825431	0.317885	-1.59457	-	-			0.376859	0.364368	0.878724	0.833373	-	-			0.33226	0.352756	0.757824	0.819442					-0.0554511	0.0437862	0.966221	-0.126728	-	-			-0.0445903	0.0624653	0.925436	-0.173585
Q8K157	Galm	Aldose 1-epimerase	Galm	0.581953	0.731254	0.713138	1.43298	-	-			-0.350393	0.314154	0.6887	-0.736946	-	-			-0.809898	0.501247	0.818867	-1.1156	-	-			-1.74223	1.63923	0.17212	-2.90112					-1.16029	0.851715	0.462855	-1.69661	-	-			-0.932325	1.26134	0.143023	-2.24745
Q8K352	Sash3	SAM and SH3 domain-containing protein 3	Sash3					-	-							-	-			0			0	-	-			NaN	NaN	NaN	NaN									-	-			NaN	NaN	NaN	NaN
Q8K353	Cystm1	Cysteine-rich and transmembrane domain-containing protein 1	Cystm1					-	-							-	-			0.735281	0.243014	0.925535	0.605202	-	-			-0.9083	0.314121	0.786166	-0.768306									-	-			-1.64357	0.516866	0.501505	-1.14463
Q8K354	Cbr3	Carbonyl reductase [NADPH] 3	Cbr3	0.156742	0.239922	0.929388	0.578776	-	-			-1.06977	2.00004	0.0465793	-3.10586	-	+			0.148293	0.125102	0.969034	0.326436	-	-			-1.0782	1.52408	0.190945	-2.49223					-0.921478	1.14682	0.325547	-1.9958	-	-			-1.2265	2.70286	0.0119697	-4.02996		+
Q8K3A0	Hscb	Iron-sulfur cluster co-chaperone protein HscB, mitochondrial	Hscb					-	-							-	-			0			0	-	-			NaN	NaN	NaN	NaN									-	-			NaN	NaN	NaN	NaN
Q8K3G9	Appl2	DCC-interacting protein 13-beta	Appl2	-0.114506	0.128212	0.961721	-0.335243	-	-			-0.460039	0.836492	0.313001	-1.56569	-	-			-0.307496	0.316029	0.896254	-0.723857	-	-			-0.653008	0.706912	0.509386	-1.37538					-0.767535	0.844057	0.467972	-1.57656	-	-			-0.345493	0.633719	0.413313	-1.26381
Q8QZY6	Tspan14	Tetraspanin-14	Tspan14					-	-							-	-			0			0	-	-			NaN	NaN	NaN	NaN				+					-	-			NaN	NaN	NaN	NaN
Q8R1F1	Fam129b	Niban-like protein 1	Fam129b	0.1471	0.235784	0.928094	0.570312	-	-			0.361591	1.09581	0.200964	1.92693	-	-			-0.0601335	0.256574	0.917695	-0.608979	-	-			0.154364	0.387291	0.734182	0.856618					0.301458	0.810954	0.486617	1.52882	-	-			0.214478	0.633671	0.413204	1.26374
Q8R361	Rab11fip5	Rab11 family-interacting protein 5	Rab11fip5	0.12564	0.12379	0.960355	0.3271	-	-			0.0298888	0.0192423	0.978338	0.0558776	-	-			-0.0496332	0.0303563	0.99374	-0.0871131	-	-			-0.145401	0.125244	0.920459	-0.330553					-0.0197444	0.00962809	0.98829	-0.028648	-	-			-0.0957569	0.0999768	0.885768	-0.267051
Q8R3T5	Stxbp6	Syntaxin-binding protein 6	Stxbp6	0.262146	0.162987	0.952782	0.41779	-	-			-0.510065	1.35375	0.132007	-2.2996	-	-			0.192341	0.578735	0.777228	1.19186	-	-			-0.579874	0.379732	0.739935	-0.862213					-0.317724	0.421966	0.737607	-0.940086	-	-			-0.772214	0.85993	0.286774	-1.6119
Q8R570	Snap47	Synaptosomal-associated protein 47	Snap47	0.237247	0.159712	0.952353	0.419465	-	-			0.18882	0.382369	0.630439	0.876236	-	-			0			0	-	-			NaN	NaN	NaN	NaN				+					-	-			-0.0484197	0.0368883	0.953134	-0.105983
Q8R5A0	Smyd2	N-lysine methyltransferase SMYD2	Smyd2					-	-							-	-			0			0	-	-			NaN	NaN	NaN	NaN									-	-			NaN	NaN	NaN	NaN
Q8VBW1	Slc6a8	Sodium- and chloride-dependent creatine transporter 1	Slc6a8					-	-							-	-			0			0	-	-			NaN	NaN	NaN	NaN									-	-			NaN	NaN	NaN	NaN
Q8VCB1	Ndc1	Nucleoporin NDC1	Ndc1					-	-							-	-			0			0	-	-			NaN	NaN	NaN	NaN									-	-			NaN	NaN	NaN	NaN
Q8VCG1	Dut	Deoxyuridine triphosphatase	Dut	-0.210191	0.0936697	0.966145	-0.258957	-	-			-0.612108	0.561402	0.477573	-1.173	-	-			0.42332	0.478786	0.836255	1.01936	-	-			0.0213949	0.0115732	0.985959	0.0341594					-0.188788	0.22321	0.859228	-0.556304	-	-			-0.401911	0.263152	0.721806	-0.628064
Q8VCI0	Plbd1	Phospholipase B-like 1	Plbd1	0.162582	0.111196	0.964776	0.295775	-	-			0.0165228	0.0137542	0.981956	0.0400699	-	-			0.179826	0.388569	0.87566	0.871788	-	-			0.0337496	0.0243579	0.98199	0.0709036					0.196348	0.110894	0.928197	0.299516	-	-			-0.146065	0.1932	0.793489	-0.479588
Q8VD57	Sft2d2	Vesicle transport protein SFT2B	Sft2d2					-	-			0.045879	0.0432333	0.955415	0.123416	-	-			0			0	-	-			NaN	NaN	NaN	NaN									-	-			NaN	NaN	NaN	NaN
Q8VD66	Abhd4	Protein ABHD4	Abhd4					-	-							-	-			0			0	-	-			NaN	NaN	NaN	NaN				+					-	-			-0.439466	0.223613	0.762501	-0.552854
Q8VD75	Hip1	Huntingtin-interacting protein 1	Hip1	-0.665269	0.761056	0.696787	-1.65455	-	-			-0.00652218	0.00295243	0.99406	-0.00879923	-	-			0			0	-	-			NaN	NaN	NaN	NaN				+					-	-			0.65875	0.369104	0.628293	0.842293
Q8VDN2	Atp1a1	Sodium/potassium-transporting ATPase subunit alpha-1	Atp1a1	0.0282256	0.0732438	0.970697	0.2009	-	-			-0.525979	1.53176	0.0967908	-2.50217	-	-			0.0791272	0.115758	0.972146	0.30442	-	-			-0.4751	1.20755	0.285727	-2.07709					-0.446851	0.973606	0.396332	-1.75934	-	-			-0.554186	1.99397	0.0408656	-3.09802
Q8VDP3	Mical1	[F-actin]-monooxygenase MICAL1	Mical1	-0.0411409	0.0719425	0.970438	-0.19757	-	-			0.522164	2.7543	0.017424	4.09955	+	-			-0.543253	0.897253	0.672422	-1.64117	-	-			0.0200691	0.0179165	0.984031	0.0518407					-0.0210884	0.0199261	0.984512	-0.0575295	-	-			0.563313	2.04393	0.0382007	3.16254	+
Q8VEG6	Cnot6l	CCR4-NOT transcription complex subunit 6-like	Cnot6l	0.179904	0.281671	0.910277	0.699481	-	-			0.364305	0.632002	0.431448	1.32516	-	-			-0.139045	0.123302	0.969679	-0.329702	-	-			0.0453669	0.0300658	0.979607	0.089331					0.22526	0.152138	0.907453	0.407555	-	-			0.184387	0.354534	0.641067	0.822881
Q91VH2	Snx9	Sorting nexin-9	Snx9	-0.474004	1.24521	0.566758	-2.15215	-	-			0.308187	2.00748	0.0460488	3.11547	+	-			-0.406848	0.838693	0.688808	-1.55895	-	-			0.375329	0.544765	0.61148	1.12323					-0.0986605	0.131731	0.919359	-0.342593	-	-			0.782172	2.6701	0.0126545	3.9858	+
Q91VI7	Rnh1	Ribonuclease inhibitor	Rnh1	0.043369	0.10577	0.963784	0.281796	-	-			0.434263	2.08782	0.0406742	3.2193	+	-			-0.37568	1.01126	0.645854	-1.79753	-	-			0.0152473	0.0229239	0.982948	0.065971					0.058583	0.0854564	0.940614	0.231232	-	-			0.390919	3.07046	0.00691525	4.53541	+
Q91VK1	Bzw2	Basic leucine zipper and W2 domain-containing protein 2	Bzw2	-0.197932	0.248887	0.929501	-0.596993	-	-			0.569559	2.08877	0.0407519	3.22053	+	-			-0.545875	1.67949	0.41345	-2.65673	-	-			0.221595	0.283639	0.807658	0.663898					0.0236833	0.0309374	0.978544	0.0882783	-	-			0.767466	1.82944	0.0539233	2.88605
Q91WC9	Daglb	Sn1-specific diacylglycerol lipase beta	Daglb	-0.0211573	0.0148914	0.992389	-0.0440519	-	-			0.262731	0.263487	0.734863	0.635765	-	-			-0.553047	0.593169	0.772617	-1.2393	-	-			-0.26914	0.207285	0.862313	-0.521863					-0.290316	0.149213	0.908417	-0.400541	-	-			0.283893	0.430674	0.575824	0.941648
Q91WG4	Elp2	Elongator complex protein 2	Elp2	0.0804944	0.118754	0.962639	0.315088	-	-			0.520535	1.10843	0.196603	1.98913	-	-			-0.560248	1.21927	0.592176	-2.14672	-	-			-0.120217	0.187482	0.874138	-0.472183					-0.0397134	0.0440664	0.966509	-0.126444	-	-			0.440047	1.19098	0.161745	2.05498
Q91XC8	Dap	Death-associated protein 1	Dap	-0.183957	0.184244	0.948674	-0.463126	-	-			-0.178633	0.21904	0.779118	-0.535673	-	-			0.042354	0.0255201	0.99502	0.0730999	-	-			0.0476737	0.0258119	0.98175	0.0740532					-0.136279	0.0750414	0.943101	-0.205486	-	-			0.00534553	0.0047857	0.991219	0.0140508
Q91Y74	St3gal4	CMP-N-acetylneuraminate-beta-galactosamide-alpha-2,3-sialyltransferase 4	St3gal4	-0.591716	0.532582	0.791754	-1.15141	-	-			-1.31523	1.33177	0.137124	-2.49913	-	-			0.714049	0.532018	0.80188	1.17267	-	-			-0.00947475	0.00529166	0.991299	-0.0159523					-0.601177	0.616268	0.606242	-1.32675	-	-			-0.723475	0.543146	0.482445	-1.17012
Q91YU8	Ppan	Suppressor of SWI4 1 homolog	Ppan					-	-	+		0.794938	1.74323	0.0689339	2.96304	-	-			0.131185	0.16817	0.957281	0.427676	-	-			NaN	NaN	NaN	NaN			+		0.926124	1.04462	0.361986	2.09577	-	-			NaN	NaN	NaN	NaN
Q921E2	Rab31	Ras-related protein Rab-31	Rab31					-	-							-	-			-0.626366	0.895088	0.672639	-1.7296	-	-			NaN	NaN	NaN	NaN			+						-	-			NaN	NaN	NaN	NaN
Q922J3	Clip1	CAP-Gly domain-containing linker protein 1	Clip1	-0.42569	0.7271	0.71415	-1.44136	-	-			-0.177304	0.434097	0.58935	-0.94767	-	-			-0.161442	0.32049	0.896323	-0.740117	-	-			0.0869336	0.100954	0.932902	0.271898					-0.338747	0.482549	0.70119	-1.06178	-	-			0.248398	0.587803	0.44836	1.192
Q99J09	Wdr77	Methylosome protein 50	Wdr77	-0.205548	0.162776	0.952951	-0.41562	-	-			0.232108	0.316547	0.686184	0.729469	-	-			-0.00158723	0.00148103	0.999273	-0.00436475	-	-			0.43605	0.386118	0.73464	0.8579					0.23052	0.16595	0.897867	0.422724	-	-			0.437633	0.7328	0.354225	1.41408
Q99JW2	Acy1	Aminoacylase-1	Acy1	0.130789	0.314693	0.894493	0.725947	-	-			-0.719307	1.95472	0.0492268	-3.04741	-	-			0.0222825	0.0229885	0.995576	0.0661523	-	-			-0.8278	1.58177	0.181132	-2.60654					-0.697025	1.22748	0.296178	-2.12794	-	-			-0.850085	2.5244	0.0162659	-3.79101		+
Q99JY0	Hadhb	Trifunctional enzyme subunit beta, mitochondrial	Hadhb	-0.299546	0.777616	0.692904	-1.49078	-	-			-0.398667	1.8048	0.0620413	-2.85434	-	-			-0.226681	0.853386	0.68697	-1.57971	-	-			-0.325802	0.896787	0.40945	-1.65169					-0.625348	2.54538	0.0941667	-3.81891	-	+			-0.0991024	0.230352	0.755998	-0.557475
Q99K85	Psat1	Phosphoserine aminotransferase	Psat1	-0.0188036	0.0123704	0.992007	-0.0366959	-	-			1.21095	2.00173	0.046609	3.25232	+	-			-0.230072	0.405129	0.871641	-0.891838	-	-			0.99967	1.60653	0.180031	2.84843					0.980876	1.16809	0.317738	2.15702	-	-			1.22974	2.69988	0.0120604	4.29823	+
Q99LR1	Abhd12	Monoacylglycerol lipase ABHD12	Abhd12	-0.0761982	0.0659866	0.971351	-0.183409	-	-			0.207279	0.414315	0.602207	0.912696	-	-			0.148132	0.575631	0.778812	1.17901	-	-			0.431604	0.653168	0.544273	1.31123					0.355411	0.791561	0.498315	1.525	-	-			0.283503	0.391826	0.609441	0.872383
Q99LS3	Psph	Phosphoserine phosphatase	Psph					-	-							-	-			-0.913721	1.19067	0.593592	-2.14309	-	-			0.0788994	0.0548977	0.961695	0.159159									-	-			0.992623	1.61965	0.0779479	2.77775
Q99N69	Lpxn	Leupaxin	Lpxn					-	-			0.932131	1.01007	0.232632	1.91035	-	-			0.0717049	0.0582977	0.990734	0.163976	-	-			NaN	NaN	NaN	NaN			+		1.00384	0.70784	0.55034	1.55051	-	-			NaN	NaN	NaN	NaN
Q9CQ73	Pkp2	Plakophilin 2	Pkp2	0.115748	0.226506	0.933381	0.553199	-	-			-0.744075	1.64412	0.0791465	-2.69019	-	-			0.412833	0.471716	0.837312	1.0028	-	-			-0.447017	0.533098	0.618471	-1.10989					-0.331242	0.34764	0.788796	-0.791303	-	-			-0.85985	1.96853	0.0428199	-3.06521
Q9CQF3	Nudt21	Cleavage and polyadenylation specificity factor subunit 5	Nudt21	0.558292	0.753884	0.704833	1.46769	-	-			0.653051	2.07936	0.0411037	3.27709	+	-			-0.17158	0.270118	0.913748	-0.639477	-	-			-0.0767934	0.0647317	0.953653	-0.179494					0.48147	0.794468	0.497045	1.5467	-	-			0.0947673	0.110789	0.877561	0.293184
Q9CQF9	Pcyox1	Prenylcysteine oxidase	Pcyox1	0.587521	0.552361	0.789725	1.15788	-	-			0.458374	0.795759	0.33259	1.53134	-	-			-0.764536	0.984749	0.657011	-1.79091	-	-			-0.8937	0.80523	0.44918	-1.54564					-0.306162	0.177536	0.892507	-0.452713	-	-			-0.129143	0.172268	0.812411	-0.434165
Q9CR57	Rpl14	60S ribosomal protein L14	Rpl14	0.818399	0.925241	0.638606	1.70618	-	-			0.92265	1.30463	0.142713	2.20573	-	-			-0.207751	0.181516	0.951416	-0.453341	-	-			-0.103507	0.0731349	0.949775	-0.200149					0.7149	0.588614	0.625859	1.19328	-	-			0.104236	0.139586	0.846125	0.360738
Q9CWJ9	Atic	Bifunctional purine biosynthesis protein PURH	Atic	-0.0179602	0.0269405	0.986526	-0.0773743	-	-			0.28135	0.86008	0.302555	1.59951	-	-			-0.482143	1.54301	0.467627	-2.486	-	-			-0.182827	0.330298	0.776034	-0.752732					-0.200793	0.32841	0.803222	-0.749209	-	-			0.299316	1.3187	0.128668	2.22426
Q9CY66	Gar1	H/ACA ribonucleoprotein complex subunit 1	Gar1	-0.319394	0.45242	0.832205	-0.974394	-	-			0.153058	0.33878	0.669911	0.768496	-	-			0.261753	0.350426	0.886897	0.787535	-	-			0.734211	0.947483	0.38494	1.72295					0.414812	0.664272	0.576443	1.31079	-	-			0.472497	0.695182	0.37506	1.35772
Q9CZV8	Fbxl20	F-box/LRR-repeat protein 20	Fbxl20					-	-	+		0.132754	0.069724	0.926526	0.195199	-	-			0			0	-	-	+		NaN	NaN	NaN	NaN									-	-	+		NaN	NaN	NaN	NaN
Q9D0K2	Oxct1	Succinyl-CoA:3-ketoacid coenzyme A transferase 1, mitochondrial	Oxct1	-1.1542	1.07354	0.586496	-1.91558	-	-			-0.691178	1.6695	0.0762607	-2.6801	-	-			-0.0471681	0.0543506	0.992728	-0.151444	-	-			0.415867	0.279631	0.811395	0.658231					-0.738346	1.17191	0.315932	-2.05174	-	-			0.463048	0.385695	0.613763	0.853772
Q9D1R2	Kti12	Protein KTI12 homolog	Kti12	0.276025	0.348835	0.885315	0.823161	-	-			0.421237	1.78052	0.0648757	3.01935	-	-			-0.0385256	0.0874177	0.979603	-0.239368	-	-			0.106666	0.0957267	0.936097	0.267679					0.382712	1.50849	0.218647	2.97408	-	-			0.1452	0.198629	0.786994	0.499186
Q9D1T5	Prr15	Proline-rich protein 15	Prr15	0.112944	0.160755	0.953013	0.411081	-	-			-1.01734	1.96502	0.0485083	-3.12191	-	-			0.00605542	0.00383757	1	0.0112793	-	-			-1.12425	1.17268	0.294146	-2.0528					-1.01129	0.893277	0.448204	-1.677	-	-			-1.13032	2.51973	0.0164084	-3.78481		+
Q9D379	Ephx1	Epoxide hydrolase 1	Ephx1	-0.193844	0.489031	0.817465	-1.03665	-	-			-0.503331	2.77157	0.0173663	-4.12298	-	+			-0.768869	1.28658	0.566083	-2.16022	-	-			-1.07837	1.65408	0.169144	-2.66022					-1.2722	2.22102	0.105418	-3.39219	-	+			-0.309495	0.843483	0.293976	-1.57574
Q9D4H7	Lonrf3	LON peptidase N-terminal domain and RING finger protein 3	Lonrf3					-	-							-	-			0			0	-	-			NaN	NaN	NaN	NaN									-	-			NaN	NaN	NaN	NaN
Q9D7G0	Prps1	Ribose-phosphate pyrophosphokinase 1	Prps1	-0.205898	0.194818	0.943091	-0.484408	-	-			0.138977	0.399971	0.614668	0.879121	-	-			-0.111964	0.175141	0.954309	-0.440471	-	-			0.2329	0.196576	0.868778	0.488178					0.0270125	0.0335211	0.97555	0.0956109	-	-			0.344857	0.406811	0.597607	0.891174
Q9D7X3	Dusp3	Dual specificity protein phosphatase 3	Dusp3	-0.0875773	0.0378875	0.980741	-0.108257	-	-			-0.257339	0.390255	0.624668	-0.874872	-	-			-0.412764	0.470505	0.837497	-1.02733	-	-			-0.582517	0.24645	0.833862	-0.600724					-0.670103	0.98564	0.392072	-1.98915	-	-			-0.16975	0.0926994	0.893852	-0.249806
Q9D8U8	Snx5	Sorting nexin-5	Snx5	-0.4788	0.985405	0.617278	-1.79184	-	-			0.232149	0.53035	0.502005	1.09985	-	-			-0.0959954	0.227445	0.926414	-0.5515	-	-			0.61495	1.60202	0.180113	2.63371					0.136154	0.237144	0.850507	0.573099	-	-			0.710936	2.25103	0.0271264	3.43131	+
Q9DBS5	Klc4	Kinesin light chain 4	Klc4	0.183218	0.435168	0.844066	0.944572	-	-			-0.459373	1.37447	0.126817	-2.29745	-	-			0.231775	0.258191	0.915647	0.613792	-	-			-0.4108	0.484881	0.657482	-1.02966					-0.227599	0.226232	0.858635	-0.550628	-	-			-0.642612	2.45762	0.0183175	-3.7025		+
Q9DBT5	Ampd2	AMP deaminase 2	Ampd2	0.275444	0.496313	0.813233	1.055	-	-			0.615643	1.29996	0.143327	2.22668	-	-			-0.684245	0.956703	0.650618	-1.73582	-	-			-0.34405	0.379318	0.739679	-0.845648					-0.0686024	0.0483768	0.964828	-0.136295	-	-			0.340171	1.18872	0.162572	2.05196
Q9DC11	Plxdc2	Plexin domain-containing protein 2	Plxdc2					-	-		+					-	-		+	0.154607	0.103461	0.97581	0.279387	-	-			-0.351	0.206079	0.863116	-0.533131									-	-		+	-0.505633	0.721103	0.360925	-1.45103
Q9DCL9	Paics	Multifunctional protein ADE2	Paics	-0.85818	1.89475	0.458136	-3.027	-	-			0.0635375	0.327639	0.678067	0.747767	-	-			-0.112566	0.240502	0.92749	-0.576739	-	-			0.809121	1.52184	0.191796	2.48931					-0.0490282	0.0817939	0.94122	-0.222061	-	-			0.921707	2.41013	0.0198201	3.63982	+
Q9DCZ1	Gmpr	GMP reductase 1	Gmpr	0.335546	0.510766	0.803955	1.07299	-	-			-0.548033	1.00918	0.232728	-1.80855	-	-			-0.155395	0.149017	0.963744	-0.386012	-	-			-1.039	1.39557	0.224044	-2.51302					-0.703429	0.996452	0.385655	-1.88902	-	-			-0.883567	1.71038	0.067178	-2.73278
Q9EQ08	Sgsh	Heparan N-sulfatase	Sgsh	-0.99677	0.251718	0.92814	-0.616649	-	-			-1.27885	0.327543	0.678029	-0.780548	-	-			0			0	-	-			NaN	NaN	NaN	NaN				+					-	-			-0.282115	0.0678036	0.919828	-0.189003
Q9EQI5	Ppbp	Chemokine (C-X-C motif) ligand 7, isoform CRA_b	Ppbp					-	-							-	-			0			0	-	-			NaN	NaN	NaN	NaN									-	-			NaN	NaN	NaN	NaN
Q9ERT9	Ppp1r1a	Protein phosphatase 1 regulatory subunit 1A	Ppp1r1a	0.34978	0.256306	0.924576	0.633524	-	-							-	-			0			0	-	-			NaN	NaN	NaN	NaN				+					-	-			NaN	NaN	NaN	NaN
Q9ES52	Inpp5d	Phosphatidylinositol 3,4,5-trisphosphate 5-phosphatase 1	Inpp5d					-	-							-	-			-0.713055	0.617283	0.765358	-1.24536	-	-			NaN	NaN	NaN	NaN			+						-	-			NaN	NaN	NaN	NaN
Q9ES70	Nek6	Serine/threonine-protein kinase Nek6	Nek6					-	-	+		1.50991	2.4902	0.0226971	5.28395	+	-			0			0	-	-	+		NaN	NaN	NaN	NaN									-	-	+		NaN	NaN	NaN	NaN
Q9ESX5	Dkc1	H/ACA ribonucleoprotein complex subunit DKC1	Dkc1	-0.295675	0.472177	0.823165	-1.00816	-	-			0.209273	0.821143	0.319585	1.54357	-	-			0.013401	0.0399499	0.990489	0.11272	-	-			0.51831	1.10993	0.318678	1.94606					0.222674	0.628345	0.59829	1.25548	-	-			0.504952	1.22416	0.152835	2.09922
Q9ESY9	Ifi30	Gamma-interferon-inducible lysosomal thiol reductase	Ifi30					-	-							-	-			0			0	-	-			NaN	NaN	NaN	NaN									-	-			NaN	NaN	NaN	NaN
Q9ESZ8	Gtf2i	General transcription factor II-I	Gtf2i	-0.213748	0.456864	0.828072	-0.987394	-	-			-0.0177452	0.0529076	0.946364	-0.147975	-	-			-0.635667	0.662406	0.75469	-1.31592	-	-			-0.439673	0.348796	0.760487	-0.793458					-0.653412	0.524334	0.672575	-1.11062	-	-			0.196024	0.561126	0.466963	1.14955
Q9ET30	Tm9sf3	Transmembrane 9 superfamily member 3	Tm9sf3	0.339615	0.738227	0.709139	1.43177	-	-			-0.270834	0.890793	0.288444	-1.6432	-	-			-0.0326966	0.0574034	0.990743	-0.159165	-	-			-0.643155	1.4741	0.201951	-2.42736					-0.303531	0.600999	0.618532	-1.21279	-	-			-0.610455	2.13134	0.0333442	-3.27568		+
Q9JJD0	Thap11	THAP domain-containing protein 11	Thap11	-0.367894	0.379703	0.86666	-0.86216	-	-			0.378881	0.220758	0.777609	0.546792	-	-			0			0	-	-			NaN	NaN	NaN	NaN				+					-	-			0.74678	0.579517	0.453638	1.20313
Q9JJG0	Tacc2	Transforming acidic coiled-coil-containing protein 2	Tacc2	-0.697202	0.654535	0.744254	-1.32569	-	-			-0.550083	1.99633	0.0464804	-3.24455	-	-			0.0460647	0.0445985	0.991945	0.126569	-	-			0.19317	0.103974	0.93351	0.280649					-0.504019	0.669875	0.577075	-1.36715	-	-			0.147104	0.112329	0.875729	0.298505
Q9JJZ2	Tuba8	Tubulin alpha-8 chain	Tuba8	-0.434849	0.325975	0.89352	-0.76715	-	-			-0.551649	0.522502	0.507815	-1.11851	-	-			0			0	-	-	+		NaN	NaN	NaN	NaN				+					-	-	+		-0.116797	0.0804328	0.905546	-0.219795
Q9JL62	Gltp	Glycolipid transfer protein	Gltp	-0.428638	0.594981	0.778086	-1.20999	-	-			-0.109594	0.146673	0.847297	-0.376938	-	-			-0.0191722	0.0366371	0.991979	-0.103924	-	-			0.29985	0.570105	0.590312	1.17011					-0.128766	0.190514	0.884228	-0.475146	-	-			0.319026	0.556745	0.470774	1.14253
Q9JLM8	Dclk1	Serine/threonine-protein kinase DCLK1	Dclk1	-0.344635	0.249026	0.929487	-0.611017	-	-			1.37593	2.45812	0.0237238	3.92537	+	-			-1.05322	0.873204	0.680898	-1.64728	-	-			0.667325	0.301211	0.797252	0.717921					0.322708	0.152749	0.907528	0.399325	-	-			1.72056	2.21451	0.028633	3.56178	+
Q9JMG3	Tmub1	Transmembrane and ubiquitin-like domain-containing protein 1	Tmub1					-	-			-0.374382	0.782559	0.339766	-1.55039	-	-			0.0768329	0.101487	0.974775	0.273208	-	-			NaN	NaN	NaN	NaN			+		-0.297549	0.367579	0.772858	-0.860246	-	-			NaN	NaN	NaN	NaN
Q9QX60	Dguok	Deoxyguanosine kinase, mitochondrial	Dguok	-0.855693	0.869942	0.654851	-1.66285	-	-			-0.0933928	0.267594	0.73075	-0.636956	-	-			-1.12579	1.05882	0.623487	-1.89504	-	-			-0.363523	0.18263	0.87732	-0.459599					-1.21919	0.998411	0.384417	-1.83081	-	-			0.76231	0.901543	0.266334	1.6892
Q9QXE0	Hacl1	2-hydroxyacyl-CoA lyase 1	Hacl1					-	-							-	-			0			0	-	-			NaN	NaN	NaN	NaN				+					-	-			0.676453	0.467524	0.545116	1.03451
Q9QXH4	Itgax	Integrin alpha-X	Itgax					-	-							-	-		+	0			0	-	-	+		NaN	NaN	NaN	NaN									-	-			NaN	NaN	NaN	NaN
Q9QXS1	Plec	Plectin	Plec	-0.326003	0.872565	0.654327	-1.63025	-	-			0.128611	1.28897	0.145659	2.18508	-	-			-0.250687	1.05005	0.630423	-1.84977	-	-			0.203943	0.408635	0.713719	0.894377					-0.122077	0.402442	0.754866	-0.883482	-	-			0.454586	1.44057	0.103388	2.38375
Q9QXX4	Slc25a13	Calcium-binding mitochondrial carrier protein Aralar2	Slc25a13	-0.0606562	0.10504	0.963573	-0.280865	-	-			-0.802439	1.91628	0.0523756	-3.05605	-	-			0.463515	0.728523	0.737927	1.42877	-	-			-0.278283	0.449362	0.684895	-0.980977					-0.338924	0.538824	0.661789	-1.1467	-	-			-0.741783	1.90497	0.0470191	-2.98329
Q9QYB5	Add3	Gamma-adducin	Add3	-0.431788	0.873763	0.652902	-1.63199	-	-			-0.38144	1.93166	0.0511683	-3.01767	-	-			-0.0934151	0.292798	0.907188	-0.679744	-	-			-0.0430359	0.0607549	0.957128	-0.168236					-0.474855	1.97077	0.131828	-3.06809	-	-			0.0503784	0.0770789	0.909831	0.21017
Q9QZF2	Gpc1	Glypican-1	Gpc1	-0.183705	0.115205	0.962809	-0.306569	-	-			0.130866	0.0969168	0.894399	0.261938	-	-			0			0	-	-			NaN	NaN	NaN	NaN				+					-	-			0.314567	0.248458	0.737724	0.596125
Q9QZK2	Bcar3	Breast cancer anti-estrogen resistance protein 3	Bcar3					-	-							-	-			0			0	-	-			NaN	NaN	NaN	NaN									-	-			NaN	NaN	NaN	NaN
Q9R045	Angptl2	Angiopoietin-related protein 2	Angptl2					-	-			0.183973	0.177928	0.818426	0.461454	-	-			0			0	-	-			NaN	NaN	NaN	NaN									-	-			NaN	NaN	NaN	NaN
Q9R0Y5	Ak1	Adenylate kinase isoenzyme 1	Ak1	0.217248	0.170076	0.952791	0.430498	-	-			-0.743968	0.662983	0.408458	-1.30882	-	-			-0.996918	0.899125	0.670989	-1.655	-	-			-1.95812	2.28892	0.0850496	-3.56465		+			-1.74089	2.03441	0.126538	-3.21595	-	+			-0.961202	0.911218	0.262655	-1.67207
Q9R111	Gda	Guanine deaminase	Gda	0.430623	0.95101	0.630078	1.743	-	-			1.54909	4.55123	0.00216667	6.83747	+	-			-0.615494	1.42379	0.514179	-2.33555	-	-			0.502962	0.969415	0.374051	1.75351					0.933592	1.80115	0.153964	2.84964	-	-			1.11846	4.58742	0.000333333	6.90055	+
Q9WU03	Spint2	Kunitz-type protease inhibitor 2	Spint2	0.567826	0.559343	0.792942	1.22295	-	-			0.130443	0.133369	0.859814	0.351464	-	-			0.139449	0.0743518	0.986415	0.206003	-	-			-0.297917	0.123682	0.920878	-0.333662					0.269893	0.140366	0.915682	0.370375	-	-			-0.437367	0.399741	0.603058	-0.909095
Q9WUA3	Pfkp	ATP-dependent 6-phosphofructokinase, platelet type	Pfkp	-0.10106	0.291302	0.904969	-0.68101	-	-			0.0258106	0.0705035	0.92593	0.193424	-	-			-0.230565	0.654937	0.756112	-1.29004	-	-			-0.103678	0.216185	0.854581	-0.528163					-0.204755	0.502297	0.686222	-1.05383	-	-			0.126864	0.429363	0.576805	0.930505
Q9WUK4	Rfc2	Replication factor C subunit 2	Rfc2	0.275112	0.190386	0.945222	0.481157	-	-			1.00113	1.6156	0.0830034	2.65192	-	-			-0.525264	1.42346	0.512558	-2.39373	-	-			0.200765	0.207493	0.862748	0.518391					0.475863	0.44123	0.726238	0.966602	-	-			0.726039	1.62088	0.0777272	2.71147
Q9WUM4	Coro1c	Coronin-1C	Coro1c	0.242507	0.30805	0.896977	0.71328	-	-			0.0633325	0.0774357	0.91821	0.211073	-	-			-0.868881	1.71614	0.419139	-2.70238	-	-			-1.04807	1.84803	0.136266	-2.90998					-0.805549	1.03595	0.36684	-1.84534	-	-			-0.179202	0.499313	0.515554	-1.04889
Q9WVA2	Timm8a1	Mitochondrial import inner membrane translocase subunit Tim8 A	Timm8a1	-0.797907	0.940529	0.631552	-1.74649	-	-			-0.898456	1.19836	0.17006	-2.15446	-	-			0.86975	0.833395	0.68639	1.63172	-	-			0.76914	0.689017	0.519628	1.38097					-0.0287066	0.0205522	0.9846	-0.0595969	-	-			-0.10059	0.0728973	0.915078	-0.202243
Q9Z0M5	Lipa	Lysosomal acid lipase/cholesteryl ester hydrolase	Lipa	1.107	0.602747	0.774214	1.25543	-	-			1.90161	1.69138	0.0744725	2.81073	-	-			0.235967	0.334848	0.890909	0.771581	-	-			1.03053	0.997145	0.357201	1.93844					2.13758	1.00221	0.383363	2.01904	-	-			0.794603	1.22915	0.151615	2.13022
Q9Z1G4	Atp6v0a1	V-type proton ATPase 116 kDa subunit a isoform 1	Atp6v0a1	-0.0948191	0.124911	0.961171	-0.3285	-	-			0.0797697	0.0967548	0.894381	0.259804	-	-			-0.59796	0.574875	0.778162	-1.17779	-	-			-0.423366	0.354228	0.756915	-0.80356					-0.51819	0.392321	0.763549	-0.878646	-	-			0.17459	0.273799	0.712318	0.64467
Q9Z1K5	Arih1	E3 ubiquitin-protein ligase ARIH1	Arih1	0.398559	0.319784	0.893201	0.754926	-	-			0.123745	0.142128	0.850631	0.372004	-	-			0.173094	0.223337	0.924691	0.552268	-	-			-0.101727	0.0708912	0.952054	-0.198254					0.296839	0.455033	0.71935	1.05551	-	-			-0.274827	0.288194	0.699709	-0.67771
Q9Z2S7	Tsc22d3	TSC22 domain family protein 3	Tsc22d3					-	-			-0.99559	1.15982	0.180691	-2.14412	-	-			0			0	-	-			NaN	NaN	NaN	NaN									-	-			NaN	NaN	NaN	NaN
A0A075B5S2	Ighv7-1	Uncharacterized protein (Fragment)	Ighv7-1					-	-							-	-			0			0	-	-			NaN	NaN	NaN	NaN									-	-			NaN	NaN	NaN	NaN
A0A075B5T2	Ighv6-3	Immunoglobulin heavy variable 6-3 (Fragment)	Ighv6-3					-	-							-	-			0			0	-	-			NaN	NaN	NaN	NaN									-	-			NaN	NaN	NaN	NaN
A0A087WQ44	Srcap	Snf2-related CREBBP activator protein	Srcap	0.469958	0.428328	0.839808	0.962499	-	-			0.739763	0.71357	0.379501	1.43876	-	-			0			0	-	-			NaN	NaN	NaN	NaN				+					-	-			0.269815	0.324083	0.669223	0.756295
A0A087WR45	Prob1	Proline-rich basic protein 1	Prob1					-	-							-	-			0			0	-	-			NaN	NaN	NaN	NaN				+					-	-			-0.863199	0.501982	0.513672	-1.14846
A0A0A6YVW3;A0A0A6YXA5	Ighv1-15;Ighv1-23	Immunoglobulin heavy variable V1-23 (Fragment)	Ighv1-15	-0.567501	0.798566	0.689347	-1.53558	-	-			-0.13068	0.201289	0.795134	-0.496832	-	-			-0.76139	0.857138	0.688208	-1.6234	-	-			-0.324575	0.210825	0.859358	-0.52556					-0.892071	0.82087	0.480625	-1.58754	-	-			0.4368	0.814724	0.308116	1.54573
A0A0A6YXW6	Igha	Immunoglobulin heavy constant alpha (Fragment)	Igha	-0.208666	0.179532	0.948802	-0.451295	-	-			-1.45763	3.41325	0.00740984	-5.02639	-	+			0.657043	1.07654	0.618315	1.88519	-	-			-0.591943	0.598255	0.576153	-1.20848					-0.800588	1.7023	0.167244	-2.72237	-	-			-1.24896	1.57843	0.0828076	-2.56256
A0A0B4J1F9	Tchh	Trichohyalin	Tchh	-1.57103	1.60758	0.487159	-2.97851	-	-			-1.11627	0.853095	0.305089	-1.69891	-	-			0			0	-	-			NaN	NaN	NaN	NaN				+					-	-			0.45475	0.248501	0.737841	0.609917
A0A0B4J1G0	Fcgr4	Low affinity immunoglobulin gamma Fc region receptor IV	Fcgr4					-	-							-	-		+	-0.486593	0.263489	0.915812	-0.635768	-	-			NaN	NaN	NaN	NaN			+						-	-		+	NaN	NaN	NaN	NaN
A0A0B4J1H7	Igkv1-135	Immunoglobulin kappa variable 1-135 (Fragment)	Igkv1-135					-	-							-	-			0			0	-	-			NaN	NaN	NaN	NaN									-	-			NaN	NaN	NaN	NaN
A0A0B4J1J6	Ighv10-1	Immunoglobulin heavy variable 10-1 (Fragment)	Ighv10-1	1.20311	0.5255	0.794109	1.1237	-	-			-1.03356	1.7587	0.067255	-3.49215	-	-			0			0	-	-			NaN	NaN	NaN	NaN				+					-	-			-2.23668	1.40676	0.110138	-2.46201
A0A0G2JG52	Crybg1	Crystallin beta-gamma domain-containing 1	Crybg1	0.11233	0.292933	0.903747	0.690507	-	-			0.32812	0.775848	0.343595	1.50117	-	-			0.302095	0.705477	0.74339	1.38212	-	-			0.51788	1.72349	0.154385	2.85604					0.630215	1.6047	0.193924	2.84549	-	-			0.2158	0.596488	0.441988	1.2057
A0A0J9YUD5	Nup205	Nucleoporin 205	Nup205	-0.0129197	0.013795	0.992839	-0.0401872	-	-			-0.0691693	0.149947	0.843818	-0.384368	-	-			0.154351	0.25632	0.917909	0.608473	-	-			0.0981188	0.101675	0.932686	0.271185					0.0851812	0.131003	0.917972	0.3409	-	-			-0.0562383	0.06416	0.924031	-0.177084
A0A0U1RNF2	Lcmt1	Leucine carboxyl methyltransferase 1	Lcmt1	0.104764	0.1146	0.96245	0.305112	-	-			-0.376261	0.855794	0.304431	-1.64121	-	-			-0.304735	0.705334	0.743048	-1.40692	-	-			-0.785775	1.32773	0.242807	-2.34539					-0.680996	1.54338	0.207146	-2.86492	-	-			-0.481033	0.900704	0.266278	-1.67093
A0A140LIF8	Irgm2	Immunity-related GTPase family M member 2	Irgm2					-	-							-	-			0			0	-	-			NaN	NaN	NaN	NaN									-	-			NaN	NaN	NaN	NaN
A0A140LIJ4	Dnah14	Dynein, axonemal, heavy chain 14	Dnah14	-1.336	1.09679	0.583338	-1.94793	-	-			-0.390123	0.718304	0.376284	-1.413	-	-			-0.0305973	0.0368588	0.9927	-0.105902	-	-			0.915284	0.512202	0.636206	1.08997					-0.42072	0.588001	0.626217	-1.21717	-	-			0.945883	0.642265	0.4083	1.29396
A0A140T8M2	Igkv12-44	Immunoglobulin kappa variable 12-44 (Fragment)	Igkv12-44					-	-							-	-			0			0	-	-			NaN	NaN	NaN	NaN									-	-			NaN	NaN	NaN	NaN
A0A140T8N9	Igkv6-32	Immunoglobulin kappa variable 6-32 (Fragment)	Igkv6-32					-	-							-	-			0			0	-	-			NaN	NaN	NaN	NaN									-	-			NaN	NaN	NaN	NaN
A0A140T8P6	Igkv12-46	Immunoglobulin kappa variable 12-46 (Fragment)	Igkv12-46					-	-							-	-			0			0	-	-			NaN	NaN	NaN	NaN									-	-			NaN	NaN	NaN	NaN
A0A1L1SQU7	Fat1	FAT atypical cadherin 1	Fat1	-0.062325	0.0553249	0.977777	-0.157006	-	-			-0.554311	2.62287	0.0192617	-4.63519	-	+			0.302826	0.833484	0.687027	1.66618	-	-			-0.189125	0.146173	0.911721	-0.387674					-0.251484	0.62492	0.602278	-1.34243	-	-			-0.491965	0.680949	0.383757	-1.38538
A0A2I3BQG2	Crybg2	Crystallin beta-gamma domain-containing 2	Crybg2	-0.603895	0.738118	0.708771	-1.60965	-	-			-0.55787	1.05775	0.215902	-2.25099	-	-			0			0	-	-			NaN	NaN	NaN	NaN				+					-	-			0.0460008	0.0473878	0.939581	0.138379
A0A2I3BR81	Nt5dc2	5'-nucleotidase domain-containing 2	Nt5dc2					-	-							-	-			0			0	-	-			NaN	NaN	NaN	NaN									-	-			NaN	NaN	NaN	NaN
A0A2R8VHP3	Gm5478	Uncharacterized protein	Gm5478	-1.14694	0.431702	0.842568	-0.93854	-	-			-0.305041	0.125142	0.864356	-0.327213	-	-			-0.148724	0.0711619	0.987396	-0.194728	-	-			0.693185	0.285091	0.808617	0.666719					-0.453765	0.149419	0.908502	-0.383173	-	-			0.841914	0.55373	0.473025	1.13768
A1L314	Mpeg1	Macrophage-expressed gene 1 protein	Mpeg1					-	-							-	-			0.886502	0.768951	0.719076	1.52849	-	-			NaN	NaN	NaN	NaN			+						-	-			NaN	NaN	NaN	NaN
A2A432	Cul4b	Cullin-4B	Cul4b	0.464836	0.500078	0.812652	1.07945	-	-			0.422909	1.32405	0.138511	2.33996	-	-			-0.39546	0.600355	0.770762	-1.23752	-	-			-0.437405	0.367874	0.747276	-0.839979					0.0274491	0.0232445	0.984441	0.0681446	-	-			-0.0419468	0.0430993	0.945364	-0.12207
A2A484	Zmynd8	Zinc finger, MYND-type-containing 8	Zmynd8	-0.655757	0.522904	0.793245	-1.18962	-	-			-0.258141	0.360336	0.649147	-0.834079	-	-			0.031817	0.0279668	0.994667	0.0810983	-	-			0.429417	0.292659	0.803198	0.709481					-0.226324	0.15088	0.908119	-0.398784	-	-			0.397567	0.506468	0.511296	1.10484
A2A4P0	Dhx8	ATP-dependent RNA helicase DHX8	Dhx8					-	-							-	-			0.12224	0.0969256	0.975064	0.263206	-	-			-0.445967	0.268654	0.821536	-0.671483									-	-			-0.568199	0.403421	0.600205	-0.906135
A2A5R2	Arfgef2	Brefeldin A-inhibited guanine nucleotide-exchange protein 2	Arfgef2	0.643579	1.29893	0.552991	2.3029	-	-			0.0643544	0.0630709	0.933778	0.174667	-	-			-0.493005	0.532845	0.801128	-1.10391	-	-			-1.07224	1.43658	0.210984	-2.45269					-0.42865	0.389972	0.763323	-0.869033	-	-			-0.57922	1.07051	0.200054	-1.91135
A2A6A1	Gpatch8	G patch domain-containing protein 8	Gpatch8					-	-			-0.285761	0.331964	0.674417	-0.766089	-	-			0			0	-	-			NaN	NaN	NaN	NaN									-	-			NaN	NaN	NaN	NaN
A2A6T1	Cdr2l	Cerebellar degeneration-related protein 2-like	Cdr2l					-	-							-	-			0			0	-	-			NaN	NaN	NaN	NaN									-	-			NaN	NaN	NaN	NaN
A2A716	Osbpl7	Oxysterol-binding protein	Osbpl7					-	-							-	-			0			0	-	-			NaN	NaN	NaN	NaN				+					-	-			0.11715	0.0327861	0.957186	0.0951598
A2A7S8	Kiaa1522	Uncharacterized protein KIAA1522	Kiaa1522	0.0260003	0.0268819	0.986445	0.0772108	-	-			-0.489431	0.883526	0.291924	-1.6329	-	-			0.462968	0.84348	0.685535	1.60304	-	-			-0.0524502	0.0562642	0.961118	-0.157848					-0.0264624	0.0215014	0.984793	-0.0625015	-	-			-0.515414	1.33548	0.12444	-2.24631
A2A863	Itgb4	Integrin beta-4	Itgb4	0.124991	1.04704	0.597696	1.87858	-	-			-0.0146982	0.0425636	0.95504	-0.120005	-	-			-0.0811269	0.155513	0.960541	-0.396057	-	-			-0.220801	0.547681	0.609213	-1.12794					-0.0958251	0.200804	0.874017	-0.495802	-	-			-0.139686	0.533783	0.488986	-1.10544
A2A8L5	Ptprf	Receptor-type tyrosine-protein phosphatase F	Ptprf	0.6471	0.740238	0.710599	1.4821	-	-			0.474809	0.691167	0.389822	1.36024	-	-			-0.311362	0.407077	0.870993	-0.899789	-	-			-0.483625	0.526899	0.625391	-1.14131					0.163448	0.107313	0.927966	0.288848	-	-			-0.172293	0.444994	0.563685	-0.966751
A2A8U2	Tmem201	Transmembrane protein 201	Tmem201	0.684823	0.836082	0.679754	1.67051	-	-			0.05346	0.0432531	0.955564	0.125251	-	-			0			0	-	-			NaN	NaN	NaN	NaN				+					-	-			-0.631386	0.878657	0.277501	-1.70361
A2A9K7	Cnksr1	Connector enhancer of kinase suppressor of Ras 1	Cnksr1					-	-			0.0604916	0.0485559	0.951461	0.141629	-	-			0			0	-	-			NaN	NaN	NaN	NaN									-	-			NaN	NaN	NaN	NaN
A2AAE1	Kiaa1109	Transmembrane protein KIAA1109	Kiaa1109					-	-							-	-			0			0	-	-			NaN	NaN	NaN	NaN									-	-			NaN	NaN	NaN	NaN
A2AAJ9	Obscn	Obscurin	Obscn	0.497395	0.281318	0.910401	0.667533	-	-			0.0913512	0.0435618	0.955459	0.122977	-	-			0			0	-	-			NaN	NaN	NaN	NaN				+					-	-			-0.406049	0.306818	0.683208	-0.710921
A2AAY5	Sh3pxd2b	SH3 and PX domain-containing protein 2B	Sh3pxd2b					-	-							-	-			-0.478423	0.453892	0.846387	-0.982239	-	-			-0.0781755	0.0544828	0.961816	-0.15605									-	-			0.400257	0.403427	0.600394	0.898855
A2AB59	Arhgap27	Rho GTPase-activating protein 27	Arhgap27	-0.523755	0.577666	0.784215	-1.20006	-	-			-0.693853	0.705649	0.383214	-1.3934	-	-			0.246333	0.174109	0.953615	0.442689	-	-			0.0762332	0.0568005	0.960664	0.159995					-0.44752	0.29658	0.816339	-0.717553	-	-			-0.170081	0.170994	0.813279	-0.431362
A2ABU4	Myom3	Myomesin-3	Myom3	0.086924	0.0521136	0.97972	0.146797	-	-			-0.671209	0.567787	0.472788	-1.16637	-	-			-1.39773	1.38918	0.508898	-2.34749	-	-			-2.15584	2.07731	0.103118	-3.47594		+			-2.06893	1.45287	0.229007	-2.53014	-	-			-0.758117	1.17242	0.168224	-2.05245
A2ABV5	Med14	Mediator of RNA polymerase II transcription subunit 14	Med14					-	-							-	-			0			0	-	-			NaN	NaN	NaN	NaN									-	-			NaN	NaN	NaN	NaN
A2ACP1	Ttc39a	Tetratricopeptide repeat protein 39A	Ttc39a	-0.358887	0.525665	0.794276	-1.09765	-	-			-0.149729	0.207157	0.790358	-0.509238	-	-			0.15417	0.12366	0.969144	0.323058	-	-			0.363329	0.29999	0.797368	0.695455					0.00444094	0.00326256	0.99092	0.00959551	-	-			0.209129	0.226159	0.760113	0.548848
A2ADY9	Ddi2	Protein DDI1 homolog 2	Ddi2	-0.130229	0.176508	0.950072	-0.444672	-	-			0.403364	1.15057	0.184136	2.00085	-	-			0.100697	0.179962	0.953531	0.451	-	-			0.6343	1.16331	0.300689	2.03991					0.504062	1.03691	0.366661	1.86438	-	-			0.533612	1.27642	0.139731	2.1685
A2AF47	Dock11	Dedicator of cytokinesis protein 11	Dock11	0.328058	0.32332	0.894467	0.77203	-	-			0.881189	0.779363	0.341592	1.52323	-	-			0			0	-	-			NaN	NaN	NaN	NaN				+					-	-			0.553115	0.608584	0.431954	1.24016
A2AFS3	Kiaa1324	UPF0577 protein KIAA1324	Kiaa1324	0.27478	0.188289	0.946174	0.476545	-	-			-0.621684	0.528142	0.504298	-1.12827	-	-			0.785801	0.60858	0.765557	1.28467	-	-			-0.110653	0.0609199	0.957252	-0.171962					0.164117	0.157144	0.904668	0.413473	-	-			-0.89644	0.710236	0.365537	-1.4147
A2AGH6	Med12	Mediator of RNA polymerase II transcription subunit 12	Med12					-	-							-	-			0			0	-	-			NaN	NaN	NaN	NaN									-	-			NaN	NaN	NaN	NaN
A2AGT5	Ckap5	Cytoskeleton-associated protein 5	Ckap5	0.372334	0.981692	0.618731	1.78658	-	-			0.137522	0.390455	0.624551	0.862253	-	-			-0.130765	0.758796	0.725841	-1.45258	-	-			-0.365567	1.43975	0.21055	-2.41568					0.0067571	0.0131292	0.985579	0.0382756	-	-			-0.234807	0.95125	0.24431	-1.72821
A2AI08	Tprn	Taperin	Tprn	-0.142638	0.16494	0.952428	-0.422186	-	-			-0.202843	0.208511	0.788978	-0.515371	-	-			0.385622	0.492281	0.828208	1.04815	-	-			0.325425	0.506297	0.641481	1.07987					0.182779	0.276343	0.835056	0.667549	-	-			-0.0601994	0.0619038	0.926261	-0.171228
A2AIV2	Virma	Protein virilizer homolog	Virma					-	-			0.217307	0.298255	0.703715	0.711984	-	-			0			0	-	-			NaN	NaN	NaN	NaN									-	-			NaN	NaN	NaN	NaN
A2AIX1	Sec16a	Protein transport protein sec16	Sec16a	0.432866	0.916469	0.640393	1.73365	-	-			0.378048	1.40307	0.120903	2.40564	-	-			-0.0672469	0.165275	0.957629	-0.418721	-	-			-0.122016	0.219754	0.853294	-0.537164					0.310801	0.982975	0.392345	1.834	-	-			-0.0547806	0.0976161	0.888502	-0.261285
A2AJ15	Man1b1	Endoplasmic reticulum mannosyl-oligosaccharide 1,2-alpha-mannosidase	Man1b1					-	-							-	-			0			0	-	-			NaN	NaN	NaN	NaN									-	-			NaN	NaN	NaN	NaN
A2AJ76	Hmcn2	Hemicentin-2	Hmcn2	-0.0301018	0.0398177	0.980143	-0.113548	-	-			0.568718	1.00165	0.236168	1.8355	-	-			-0.826108	1.09496	0.60833	-1.96987	-	-			-0.2273	0.227876	0.844256	-0.558586					-0.25739	0.264558	0.837781	-0.643323	-	-			0.598821	1.09057	0.192471	1.91983
A2AJI0	Map7d1	MAP7 domain-containing protein 1	Map7d1	0.700397	0.892474	0.649467	1.72547	-	-			0.825809	1.05464	0.217422	1.98003	-	-			-0.313605	0.524319	0.803634	-1.12165	-	-			-0.1882	0.303762	0.79451	-0.716535					0.512203	0.434517	0.728307	1.01457	-	-			0.125434	0.20313	0.781099	0.502161
A2AKG8	Focad	Focadhesin	Focad	0.682756	0.627043	0.764637	1.39308	-	-			0.796808	0.801765	0.329176	1.61311	-	-			0			0	-	-			NaN	NaN	NaN	NaN				+					-	-			0.114046	0.122721	0.865536	0.328301
A2ALK8	Ptpn3	Tyrosine-protein phosphatase non-receptor type 3	Ptpn3	-0.139329	0.110374	0.963867	-0.29824	-	-			-1.15482	1.24591	0.156065	-2.22468	-	-			0			0	-	-			NaN	NaN	NaN	NaN				+					-	-			-1.0155	0.979274	0.232854	-1.82844
A2ALU4	Shroom2	Protein Shroom2	Shroom2					-	-							-	-			0			0	-	-			NaN	NaN	NaN	NaN									-	-			NaN	NaN	NaN	NaN
A2AMM0	Cavin4	Caveolae-associated protein 4	Cavin4	-0.234156	0.151494	0.956739	-0.400229	-	-			-1.24689	1.64776	0.0789374	-3.05031	-	-			0			0	-	-			NaN	NaN	NaN	NaN				+					-	-			-1.01274	0.708049	0.366948	-1.49217
A2AN08	Ubr4	E3 ubiquitin-protein ligase UBR4	Ubr4	0.257315	0.938842	0.630185	1.72564	-	-			0.307166	1.10152	0.198484	1.93467	-	-			-0.324236	0.94971	0.651493	-1.72606	-	-			-0.274383	0.773209	0.463944	-1.48421					-0.0170698	0.0309093	0.978366	-0.0884022	-	-			0.0498362	0.127033	0.861203	0.331642
A2ANX3	Atp8b4	Phospholipid-transporting ATPase	Atp8b4	-0.663504	0.494171	0.814228	-1.05136	-	-			-0.239576	0.13097	0.860887	-0.342748	-	-			0.525379	0.316099	0.897158	0.728619	-	-			0.949317	0.731376	0.493947	1.42143					0.285803	0.127731	0.919936	0.335148	-	-			0.423933	0.379797	0.617869	0.846512
A2ANY6	Mdn1	Midasin	Mdn1					-	-							-	-			0.117596	0.112699	0.970896	0.303939	-	-			NaN	NaN	NaN	NaN			+						-	-			NaN	NaN	NaN	NaN
A2APY7	Ndufaf5	Arginine-hydroxylase NDUFAF5, mitochondrial	Ndufaf5	0.777818	1.25887	0.560831	2.49095	-	-			-0.328983	0.348083	0.659812	-0.810384	-	-			0			0	-	-			NaN	NaN	NaN	NaN				+					-	-			-1.10679	1.93062	0.0453026	-3.38165
A2AQ19	Rtf1	RNA polymerase-associated protein RTF1 homolog	Rtf1					-	-			-0.125048	0.152374	0.842236	-0.40812	-	-			0			0	-	-			NaN	NaN	NaN	NaN									-	-			NaN	NaN	NaN	NaN
A2AQ25	Skt	Sickle tail protein	Skt	-0.456927	1.04664	0.596555	-1.878	-	-			-0.864328	4.06275	0.00416	-6.02152	-	+			0.0450764	0.0528587	0.991834	0.147219	-	-			-0.362307	0.451042	0.682954	-0.967756					-0.819252	1.64611	0.181773	-2.64994	-	-			-0.407393	0.857365	0.288032	-1.59563
A2AQ99	Duox2	Dual oxidase 2	Duox2	-0.535489	0.438472	0.839206	-0.961711	-	-			0.673487	1.99632	0.0464014	3.24455	-	-			0.0575592	0.076451	0.985252	0.209678	-	-			1.26656	1.19218	0.288204	2.14531					0.731046	1.56193	0.203364	2.8976	-	-			1.20898	1.71652	0.0661732	2.74068
A2AR02	Ppig	Peptidyl-prolyl cis-trans isomerase G	Ppig	0.339702	0.182576	0.948922	0.463921	-	-			-0.290809	0.377282	0.635498	-0.857634	-	-			0			0	-	-			NaN	NaN	NaN	NaN				+					-	-			-0.630517	0.572176	0.459907	-1.17345
A2ARI4	Lgr4	Leucine-rich repeat-containing G-protein coupled receptor 4	Lgr4	0.39747	0.32127	0.894995	0.783298	-	-			0.281061	0.393653	0.621655	0.911225	-	-			0			0	-	-			NaN	NaN	NaN	NaN				+					-	-			-0.116425	0.0869989	0.898776	-0.241899
A2ARJ3	Tmem236	Transmembrane protein 236	Tmem236					-	-							-	-			0			0	-	-			NaN	NaN	NaN	NaN									-	-			NaN	NaN	NaN	NaN
A2ASS6	Ttn	Titin	Ttn	0.554558	0.373152	0.869855	0.834485	-	-			-0.307643	0.183644	0.813014	-0.458997	-	-			-1.74057	2.22346	0.420324	-3.33183	-	+			-2.60278	3.56228	0.0381333	-5.24669		+			-2.04821	2.02876	0.126243	-3.14294	-	+			-0.862191	0.900763	0.266393	-1.65731
A2AT37	Upf2	UPF2 regulator of nonsense transcripts homolog (Yeast)	Upf2					-	-			0.889438	0.559371	0.479544	1.223	-	-			0			0	-	-			NaN	NaN	NaN	NaN									-	-			NaN	NaN	NaN	NaN
A2AUA2;Q7TQZ3	Olfr1251;Olfr1253	Olfactory receptor	Olfr1251					-	-							-	-			0			0	-	-			NaN	NaN	NaN	NaN									-	-			NaN	NaN	NaN	NaN
A2AUC9	Klhl41	Kelch-like protein 41	Klhl41	0.69592	0.547611	0.791585	1.14082	-	-			-0.559229	0.394945	0.619996	-0.870227	-	-			0			0	-	-			NaN	NaN	NaN	NaN				+					-	-			-1.25515	1.37749	0.115457	-2.33171
A2AVA0	Svep1	Sushi, von Willebrand factor type A, EGF and pentraxin domain-containing protein 1	Svep1					-	-							-	-			0			0	-	-			NaN	NaN	NaN	NaN									-	-			NaN	NaN	NaN	NaN
A2AWA9	Rabgap1	Rab GTPase-activating protein 1	Rabgap1	-0.795656	0.601981	0.774783	-1.27321	-	-			0.340374	0.692494	0.389081	1.37295	-	-			-0.117533	0.136845	0.966817	-0.357843	-	-			1.01849	0.623241	0.561809	1.33939					0.222842	0.200106	0.874901	0.502397	-	-			1.13602	1.26209	0.143063	2.30372
A2AWP8	Arhgef10l	Rho guanine nucleotide exchange factor 10-like protein	Arhgef10l	0.551619	0.559507	0.793704	1.18217	-	-			0.726005	1.04725	0.220855	1.90137	-	-			-0.394476	0.742399	0.730737	-1.4501	-	-			-0.220116	0.274316	0.817244	-0.657756					0.33153	0.285223	0.826591	0.68565	-	-			0.174388	0.262429	0.72292	0.624194
A2AX52	Col6a4	Collagen alpha-4(VI) chain	Col6a4	-0.105851	0.154464	0.955435	-0.398472	-	-			-0.180336	0.366833	0.644986	-0.826843	-	-			-0.211696	0.258918	0.917163	-0.61524	-	-			-0.286183	0.322726	0.781342	-0.741169					-0.392033	0.412421	0.749852	-0.915116	-	-			-0.0744837	0.118254	0.86863	-0.310975
A2BDX3	Mocs3	Adenylyltransferase and sulfurtransferase MOCS3	Mocs3					-	-			0.977985	0.816284	0.322597	1.63742	-	-			0			0	-	-			NaN	NaN	NaN	NaN									-	-			NaN	NaN	NaN	NaN
A2BE28	Las1l	Ribosomal biogenesis protein LAS1L	Las1l					-	-							-	-			0.0233019	0.0113019	0.999893	0.0332212	-	-			0.1177	0.069882	0.953119	0.199819									-	-			0.0944098	0.047218	0.939777	0.133652
A2BH40	Arid1a	AT-rich interactive domain-containing protein 1A	Arid1a	0.389652	0.316621	0.893323	0.758472	-	-			-0.0256467	0.0468951	0.953815	-0.132781	-	-			0.0920204	0.176831	0.954577	0.44538	-	-			-0.323261	0.321472	0.78104	-0.75122					0.0663737	0.0845735	0.939922	0.233615	-	-			-0.415286	0.604094	0.436244	-1.23294
A2RSY1	Kansl3	KAT8 regulatory NSL complex subunit 3	Kansl3					-	-							-	-			0			0	-	-			NaN	NaN	NaN	NaN									-	-			NaN	NaN	NaN	NaN
A2RT67	Dennd3	DENN domain-containing protein 3	Dennd3					-	-							-	-			0			0	-	-			NaN	NaN	NaN	NaN									-	-			NaN	NaN	NaN	NaN
A2RTL5	Rsrc2	Arginine/serine-rich coiled-coil protein 2	Rsrc2					-	-							-	-			0			0	-	-			NaN	NaN	NaN	NaN									-	-			NaN	NaN	NaN	NaN
A3KFX0	Nt5c1a	Cytosolic 5'-nucleotidase 1A	Nt5c1a					-	-							-	-			-0.483337	0.586127	0.77455	-1.24561	-	-			NaN	NaN	NaN	NaN			+						-	-			NaN	NaN	NaN	NaN
A3KGB4	Tbc1d8b	TBC1 domain family member 8B	Tbc1d8b	-0.0743744	0.0635526	0.972983	-0.177863	-	-			-0.190633	0.292104	0.708472	-0.685358	-	-			0.0309004	0.037737	0.992209	0.107844	-	-			-0.0853736	0.066877	0.953778	-0.187724					-0.159733	0.283492	0.828177	-0.690522	-	-			-0.116226	0.12554	0.862394	-0.328973
A3KGF9	Ccdc9b	Coiled-coil domain-containing protein 9B	Ccdc9b					-	-			-0.289556	0.522184	0.507482	-1.13292	-	-			0			0	-	-			NaN	NaN	NaN	NaN									-	-			NaN	NaN	NaN	NaN
A3KGS3	Ralgapa2	Ral GTPase-activating protein subunit alpha-2	Ralgapa2	0.361214	0.32998	0.8936	0.80149	-	-			0.156795	0.140715	0.8522	0.371197	-	-			0			0	-	-			NaN	NaN	NaN	NaN				+					-	-			-0.20442	0.218802	0.767695	-0.546826
A3KMP2	Ttc38	Tetratricopeptide repeat protein 38	Ttc38	-0.433974	1.09769	0.584269	-1.94918	-	-			-0.796046	2.48265	0.0230255	-3.73561	-	+			-0.136469	0.209951	0.933119	-0.515116	-	-			-0.49855	0.973264	0.37177	-1.77463					-0.932515	2.93199	0.0965	-4.48522	-	+			-0.362053	0.668512	0.3909	-1.31726
A6H584	Col6a5	Collagen alpha-5(VI) chain	Col6a5	-0.107128	0.0973812	0.964808	-0.268373	-	-			0.117781	0.1212	0.865764	0.320933	-	-			-1.25102	1.77227	0.411873	-3.00686	-	-			-1.02613	1.03118	0.346819	-2.07142					-1.13324	1.46337	0.226511	-2.72517	-	-			0.2249	0.208449	0.777057	0.52045
A6H5Y3	Mtr	Methionine synthase	Mtr	0.541844	0.931803	0.634032	1.99334	-	-			0.594783	1.13253	0.189827	2.16369	-	-			-0.381995	0.37392	0.879238	-0.860134	-	-			-0.329033	0.235359	0.840649	-0.598709					0.212788	0.156059	0.905878	0.416923	-	-			0.0529399	0.05994	0.927041	0.169354
A6H5Z3	Exoc6b	Exocyst complex component 6B	Exoc6b	-0.663921	0.876891	0.650775	-1.88331	-	-			-0.349108	0.438695	0.584556	-0.970408	-	-			0			0	-	-			NaN	NaN	NaN	NaN				+					-	-			0.3148	0.381404	0.617748	0.865334
A6H611	Mipep	Mitochondrial intermediate peptidase	Mipep	-0.14431	0.117795	0.96155	-0.314319	-	-			-0.391473	0.901178	0.282898	-1.73922	-	-			0			0	-	-			NaN	NaN	NaN	NaN				+					-	-			-0.24716	0.226272	0.760318	-0.555227
A6H619	Phrf1	PHD and RING finger domain-containing protein 1	Phrf1					-	-	+						-	-	+		0			0	-	-			NaN	NaN	NaN	NaN									-	-	+		NaN	NaN	NaN	NaN
A6H6A9	Rabgap1l	Rab GTPase-activating protein 1-like	Rabgap1l	-0.546908	0.349447	0.885512	-0.813031	-	-			-0.106216	0.115568	0.870925	-0.306279	-	-			-0.576962	0.704123	0.743284	-1.405	-	-			-0.13625	0.0596351	0.957953	-0.169972					-0.683178	1.40213	0.243112	-2.76465	-	-			0.440707	0.330024	0.663628	0.758218
A6H6E2	Mmrn2	Multimerin-2	Mmrn2					-	-							-	-			0			0	-	-			NaN	NaN	NaN	NaN									-	-			NaN	NaN	NaN	NaN
A6PWY0	Gm15557	Growth differentiation factor 5 opposite strand	Gm15557					-	-							-	-			0			0	-	-			NaN	NaN	NaN	NaN			+						-	-			NaN	NaN	NaN	NaN
A6X919	Dpy19l1	Probable C-mannosyltransferase DPY19L1	Dpy19l1					-	-							-	-			0			0	-	-			NaN	NaN	NaN	NaN									-	-			NaN	NaN	NaN	NaN
A6X935	Itih4	Inter alpha-trypsin inhibitor, heavy chain 4	Itih4	-0.125475	0.0503969	0.980745	-0.143707	-	-			3.18892	4.09392	0.00442553	6.78336	+	-			-0.838584	0.606402	0.766542	-1.22127	-	-			2.47582	1.34872	0.238979	2.37634					2.35034	1.61194	0.191322	2.76625	-	-			3.3144	2.87141	0.00969302	4.5712	+
A6ZI47	Aldoart2	Fructose-bisphosphate aldolase	Aldoart2	0.551912	0.321775	0.894975	0.746588	-	-			0.154586	0.0797646	0.915315	0.218893	-	-			-1.1349	0.752958	0.728337	-1.50269	-	-			-1.53223	1.0172	0.353074	-1.92151					-0.980311	0.368005	0.774657	-0.861083	-	-			-0.3973	0.355181	0.640409	-0.801653
A8C756	Thada	Thyroid adenoma-associated protein homolog	Thada					-	-							-	-			0			0	-	-			NaN	NaN	NaN	NaN									-	-			NaN	NaN	NaN	NaN
A8DUK4	Hbb-bs	Beta-globin	Hbb-bs	-0.084444	0.115145	0.962694	-0.304343	-	-			-0.849258	1.97033	0.0479207	-3.06753	-	-			-0.00561796	0.0053205	1	-0.0155821	-	-			-0.770424	1.1833	0.290477	-2.04473					-0.854876	1.28621	0.279506	-2.18144	-	-			-0.764838	1.91723	0.0458714	-2.99909
A9JSM3	Tmem238	Transmembrane protein 238	Tmem238	0.332721	0.64041	0.755269	1.33964	-	-			-0.00834846	0.00805749	0.988003	-0.0240168	-	-			0.145345	0.142002	0.965454	0.374226	-	-			-0.1957	0.265984	0.822785	-0.646266					0.136996	0.142145	0.914501	0.374563	-	-			-0.341075	0.568828	0.461925	-1.21535
B1AQ75	Krt36	Keratin, type I cuticular Ha6	Krt36	-0.341793	0.114482	0.962481	-0.315329	-	-			0.0506596	0.0189505	0.978254	0.0558128	-	-			0			0	-	-			NaN	NaN	NaN	NaN				+					-	-			0.39244	0.163611	0.821302	0.424353
B1AR13	Cisd3	CDGSH iron-sulfur domain-containing protein 3, mitochondrial	Cisd3					-	-							-	-			0			0	-	-			NaN	NaN	NaN	NaN									-	-			NaN	NaN	NaN	NaN
B1AR17	Chd3	Chromodomain helicase DNA-binding protein 3	Chd3					-	-							-	-			0			0	-	-			NaN	NaN	NaN	NaN									-	-			NaN	NaN	NaN	NaN
B1AR69	Myh13	Myosin, heavy polypeptide 13, skeletal muscle	Myh13	0.549741	0.21776	0.935544	0.540407	-	-			-0.776008	0.356925	0.652159	-0.808561	-	-			0			0	-	-			NaN	NaN	NaN	NaN				+					-	-			-1.32574	0.95552	0.242265	-1.74942
B1ARD6	Slfn9	Schlafen family member 9	Slfn9					-	-							-	-		+	0.510924	0.280432	0.910756	0.675902	-	-			NaN	NaN	NaN	NaN			+						-	-		+	NaN	NaN	NaN	NaN
B1ART2	Vps13d	Vacuolar protein sorting 13D	Vps13d	0.670968	0.36848	0.874224	0.880994	-	-			-0.0785618	0.184209	0.812694	-0.470934	-	-			-0.898032	0.90155	0.673046	-1.77961	-	-			-1.64753	0.755244	0.479637	-1.64317					-0.976594	0.675467	0.574574	-1.48739	-	-			-0.74952	0.615565	0.426099	-1.29677
B1AUN2	Eif2b3	Eukaryotic translation initiation factor 2B, subunit 3	Eif2b3	0.531963	0.701852	0.72447	1.4014	-	-			0.379005	1.49987	0.102145	2.49656	-	-			-0.0652511	0.189903	0.945881	-0.475443	-	-			-0.21819	0.212673	0.857141	-0.529528					0.313754	1.01733	0.374815	1.9217	-	-			-0.152939	0.195159	0.791379	-0.48514
B1AUY3	Arhgap4	Rho GTPase-activating protein 4	Arhgap4					-	-							-	-			0			0	-	-			NaN	NaN	NaN	NaN									-	-			NaN	NaN	NaN	NaN
B1AVH7	Tbc1d2	TBC1 domain family member 2A	Tbc1d2	-0.287251	0.699587	0.724845	-1.44081	-	-			-0.409481	1.41643	0.11779	-2.4244	-	-			0.482982	0.710331	0.742584	1.41485	-	-			0.360724	0.332894	0.77564	0.791309					0.073501	0.0637589	0.951131	0.181024	-	-			-0.122261	0.238966	0.746154	-0.578968
B1AVK5	Col4a6	Collagen, type IV, alpha 6	Col4a6	0.0750495	0.0989588	0.964581	0.265997	-	-			-0.32032	0.615681	0.44125	-1.25156	-	-			-0.0457211	0.0465214	0.992622	-0.13131	-	-			-0.441126	0.583179	0.58279	-1.19909					-0.366041	0.645571	0.588547	-1.31122	-	-			-0.3954	0.575958	0.456336	-1.17953
B1AXH1	Nhsl2	NHS-like protein 2	Nhsl2					-	-							-	-			0			0	-	-			NaN	NaN	NaN	NaN									-	-			NaN	NaN	NaN	NaN
B1AY13	Usp24	Ubiquitin carboxyl-terminal hydrolase 24	Usp24	0.0381898	0.0421354	0.98125	0.120415	-	-			-0.653013	0.711208	0.380375	-1.40202	-	-			0.0337845	0.0248586	0.995379	0.0717522	-	-			-0.65742	1.07013	0.329982	-2.00422					-0.619229	0.675213	0.574515	-1.39928	-	-			-0.69122	0.992262	0.227917	-1.80153
B1AYL1	Scn7a	Sodium channel protein	Scn7a	0.154462	0.251822	0.928163	0.602919	-	-			0.284097	0.343779	0.664658	0.777736	-	-			-0.657341	1.02165	0.643028	-1.82572	-	-			-0.527701	1.23212	0.275708	-2.13428					-0.373245	0.671147	0.577286	-1.32944	-	-			0.129647	0.146538	0.838241	0.37663
B1AZA5	Tmem245	Transmembrane protein 245	Tmem245	-0.747037	0.611317	0.770832	-1.31777	-	-			0.457591	1.17773	0.176542	2.17205	-	-			0.197131	0.134639	0.967033	0.354458	-	-			1.40181	0.748815	0.483232	1.56518					0.654722	0.468804	0.711407	1.03684	-	-			1.20465	1.28686	0.137073	2.42292
B1AZI6	Thoc2	THO complex subunit 2	Thoc2	0.277277	0.390102	0.860003	0.881519	-	-			-0.143112	0.129402	0.86196	-0.340385	-	-			-0.0566812	0.0505184	0.992354	-0.142527	-	-			-0.477005	0.895837	0.409246	-1.73078					-0.199793	0.270837	0.835822	-0.656261	-	-			-0.420347	0.534464	0.488731	-1.11903
B2RQG2	Phf3	PHD finger protein 3	Phf3	0.114788	0.105004	0.963409	0.287549	-	-			-0.185667	0.484371	0.540613	-1.06507	-	-			-0.47066	0.644618	0.763985	-1.34687	-	-			-0.771125	0.688994	0.519318	-1.45797					-0.656327	0.651222	0.583341	-1.44017	-	-			-0.300465	0.438283	0.570152	-0.969666
B2RR83	Ythdc2	3'-5' RNA helicase YTHDC2	Ythdc2					-	-	+		-0.216725	0.161402	0.832871	-0.416382	-	-			0			0	-	-	+		NaN	NaN	NaN	NaN									-	-	+		NaN	NaN	NaN	NaN
B2RRE7	Otud4	OTU domain-containing protein 4	Otud4	0.0929105	0.213962	0.938199	0.53229	-	-			0.198143	0.485782	0.539575	1.0371	-	-			-0.0118597	0.0187655	0.995928	-0.0543704	-	-			0.0934002	0.160631	0.899642	0.41247					0.186283	0.410995	0.751007	0.920046	-	-			0.105231	0.208573	0.777019	0.513694
B2RS76	Cpb1	Carboxypeptidase B1 (Tissue), isoform CRA_b	Cpb1					-	-							-	-			0			0	-	-			NaN	NaN	NaN	NaN									-	-			NaN	NaN	NaN	NaN
B2RSH2	Gnai1	Guanine nucleotide-binding protein G(i) subunit alpha-1	Gnai1	-0.231543	0.406442	0.848958	-0.898652	-	-			0.105527	0.288828	0.711219	0.676201	-	-			-0.410212	0.751206	0.730273	-1.4513	-	-			-0.0731532	0.0725288	0.94999	-0.199645					-0.304685	0.459223	0.715791	-0.986065	-	-			0.337063	0.807621	0.312328	1.54924
B2RUP2	Unc13d	Protein unc-13 homolog D	Unc13d					-	-							-	-			-0.868725	1.31915	0.550583	-2.393	-	-			NaN	NaN	NaN	NaN			+						-	-			NaN	NaN	NaN	NaN
B2RUR4	Kprp	Keratinocyte proline-rich protein	Kprp					-	-			-0.894716	0.958143	0.254847	-1.82893	-	-			0			0	-	-			NaN	NaN	NaN	NaN									-	-			NaN	NaN	NaN	NaN
B2RUR8	Otud7b	OTU domain-containing protein 7B	Otud7b					-	-			-0.222464	0.461554	0.563187	-1.00241	-	-			-0.288169	0.576298	0.77862	-1.21075	-	-			NaN	NaN	NaN	NaN			+		-0.510633	1.42227	0.235221	-2.55511	-	-			NaN	NaN	NaN	NaN
B2RV77	Gm5483	MCG130182, isoform CRA_a	Gm5483					-	-							-	-			0			0	-	-			NaN	NaN	NaN	NaN									-	-			NaN	NaN	NaN	NaN
B2RW88	Prr19	Proline-rich 19	Prr19					-	-			0.578571	1.55115	0.0945466	2.61349	-	-			0			0	-	-			NaN	NaN	NaN	NaN									-	-			NaN	NaN	NaN	NaN
B2RWS6	Ep300	Histone acetyltransferase p300	Ep300					-	-							-	-			0			0	-	-			NaN	NaN	NaN	NaN									-	-			NaN	NaN	NaN	NaN
B2RX12	Abcc3	Canalicular multispecific organic anion transporter 2	Abcc3	0.343456	1.02337	0.602123	1.86694	-	-			-0.325814	0.508732	0.519328	-1.06961	-	-			0.348035	0.426667	0.856032	0.922593	-	-			-0.321229	0.438105	0.690728	-0.945591					0.0222214	0.0204176	0.984458	0.0590512	-	-			-0.669257	1.48251	0.0965726	-2.43829
B2RXC1	Trappc11	Trafficking protein particle complex subunit 11	Trappc11	-0.164283	0.224599	0.934174	-0.554944	-	-			0.135545	0.207134	0.790216	0.514699	-	-			-0.319634	0.191834	0.946313	-0.484336	-	-			-0.0197673	0.00899423	0.987697	-0.0267809					-0.18409	0.0784908	0.943561	-0.219881	-	-			0.29985	0.603922	0.435972	1.23266
B2RXC2	Itpkb	Kinase	Itpkb	0.296251	0.637571	0.75807	1.29826	-	-			0.138419	0.390567	0.62476	0.865884	-	-			-1.04109	2.09441	0.419846	-3.50279	-	+			-1.1989	1.61406	0.178544	-2.99005					-0.902671	1.71974	0.167452	-2.92767	-	-			-0.157817	0.318939	0.673433	-0.741132
B2RXC6	Polr3a	DNA-directed RNA polymerase subunit	Polr3a					-	-							-	-			0			0	-	-			NaN	NaN	NaN	NaN				+					-	-			-0.0709328	0.0247392	0.967919	-0.0724115
B2RXQ2	Ppfia1	Ppfia1 protein	Ppfia1					-	-			-0.0158554	0.0308513	0.965816	-0.0884877	-	-			-0.287973	0.462356	0.843826	-0.996897	-	-			NaN	NaN	NaN	NaN			+		-0.303829	0.386307	0.766733	-0.883712	-	-			NaN	NaN	NaN	NaN
B2RXR6	Ankrd44	Serine/threonine-protein phosphatase 6 regulatory ankyrin repeat subunit B	Ankrd44	0.614405	0.481812	0.820395	1.07928	-	-			0.477183	0.680225	0.397415	1.38419	-	-			-1.21116	2.9014	0.5552	-5.70468	-	+			-1.34837	1.29191	0.254834	-2.75596					-0.733975	0.799706	0.494612	-1.65613	-	-			-0.137227	0.137548	0.848174	-0.363724
B2RXS4	Plxnb2	Plexin-B2	Plxnb2	-0.217819	0.550261	0.789583	-1.13795	-	-			-0.114726	0.634588	0.429181	-1.26516	-	-			-0.0149754	0.0250185	0.99548	-0.0717015	-	-			0.0881166	0.123499	0.920739	0.323356					-0.129702	0.240456	0.850107	-0.578106	-	-			0.103117	0.238998	0.746279	0.575143
B2RY04	Dock5	Dedicator of cytokinesis protein 5	Dock5	0.512795	0.480508	0.819735	1.05808	-	-			0.940094	1.42651	0.115791	2.49118	-	-			0.408133	0.311433	0.899338	0.731619	-	-			0.835458	0.525512	0.625659	1.16064					1.34823	1.3843	0.249988	2.73008	-	-			0.427325	0.366105	0.630701	0.830348
B2RY56	Rbm25	RNA-binding protein 25	Rbm25	0.324865	0.770287	0.695153	1.47985	-	-			0.253733	0.705167	0.383362	1.37276	-	-			-0.371908	0.658595	0.754739	-1.30211	-	-			-0.44305	0.69849	0.513251	-1.37145					-0.118176	0.14128	0.915072	-0.365566	-	-			-0.0711286	0.150446	0.833956	-0.385499
B5THE2	Mgam	Maltase-glucoamylase	Mgam	-0.417612	0.490506	0.816755	-1.04514	-	-			-0.563072	0.929041	0.268276	-1.71162	-	-			-0.261141	0.204738	0.935268	-0.505577	-	-			-0.40661	0.294067	0.80141	-0.689189					-0.824213	0.651937	0.582614	-1.3215	-	-			-0.145479	0.174013	0.81077	-0.437998
B5X0E4	Abcb5	ATP-binding cassette sub-family B member 5	Abcb5	-0.464566	0.430571	0.84162	-0.966656	-	-							-	-			0			0	-	-			NaN	NaN	NaN	NaN				+					-	-			NaN	NaN	NaN	NaN
B7ZMP1	Xpnpep3	Xaa-Pro aminopeptidase 3	Xpnpep3	-0.140995	0.214859	0.937707	-0.544119	-	-			0.545924	0.870547	0.297172	1.69076	-	-			0			0	-	-			NaN	NaN	NaN	NaN				+					-	-			0.686916	1.80202	0.0564108	3.0519
B8JK39	Itga9	Integrin alpha-9	Itga9					-	-							-	-			0			0	-	-			NaN	NaN	NaN	NaN									-	-			NaN	NaN	NaN	NaN
B8ZXI1	Qtrt2	Queuine tRNA-ribosyltransferase accessory subunit 2	Qtrt2	-0.311457	0.186022	0.947896	-0.474982	-	-			-0.287221	0.278616	0.721111	-0.672196	-	-			0			0	-	-	+		NaN	NaN	NaN	NaN				+					-	-	+		0.0242205	0.0156611	0.97625	0.0458142
B9EJ80	Pdzd8	PDZ domain-containing protein 8	Pdzd8	0.513946	0.442905	0.837678	1.00584	-	-			0.301069	0.479892	0.544963	1.05697	-	-			-0.260391	0.27485	0.910435	-0.664493	-	-			-0.47325	0.333748	0.775347	-0.793023					0.0406774	0.0216912	0.984839	0.0650159	-	-			-0.212891	0.275619	0.710401	-0.660388
B9EJ86	Osbpl8	Oxysterol-binding protein-related protein 8	Osbpl8	1.13628	1.17008	0.57761	2.32542	-	-			0.230859	0.267377	0.730951	0.64369	-	-			-0.0175454	0.00882425	1	-0.0261255	-	-			-0.922933	0.468877	0.667313	-1.05498					0.213314	0.08526	0.940268	0.240521	-	-			-0.9054	1.14737	0.175267	-2.07901
B9EJR8	Dnaaf5	Dynein assembly factor 5, axonemal	Dnaaf5	0.423304	0.414737	0.844743	0.93721	-	-			0.688272	1.0147	0.231593	1.88157	-	-			-0.716431	1.23227	0.592289	-2.20454	-	-			-0.451475	0.522037	0.628923	-1.13266					-0.0281587	0.0201523	0.98433	-0.0592752	-	-			0.264942	0.389332	0.611243	0.873184
B9EKI3	Tmf1	TATA element modulatory factor	Tmf1	0.404505	1.54825	0.518165	2.67147	-	-			0.287362	0.426614	0.593964	0.940592	-	-			-0.26958	0.398359	0.874097	-0.884157	-	-			-0.3867	1.10671	0.319004	-1.98667					0.0177815	0.0244236	0.984333	0.0710899	-	-			-0.117117	0.195124	0.791224	-0.485065
C0HKD8;C0HKD9	Mfap1a;Mfap1b	Microfibrillar-associated protein 1A	Mfap1a	0.733944	1.6854	0.473568	2.8023	-	-			0.31647	1.10415	0.198043	1.95815	-	-			0.0445721	0.102352	0.974722	0.273494	-	-			-0.372923	0.72184	0.498479	-1.41847					0.361042	1.07424	0.34746	1.97043	-	-			-0.417498	1.04799	0.205883	-1.86183
C0HKE1;C0HKE2;C0HKE3;C0HKE4;C0HKE5;C0HKE6;C0HKE7;C0HKE8;C0HKE9;Q8BFU2;Q8CGP5;Q8CGP6;Q8CGP7	Hist1h2ab;Hist1h2ac;Hist1h2ad;Hist1h2ae;Hist1h2af;Hist1h2ag;Hist1h2ah;Hist1h2ai;Hist1h2ak;Hist1h2an;Hist1h2ao;Hist1h2ap;Hist3h2a	Histone H2A type 1-B	Hist1h2ab	0.0592623	0.129854	0.961847	0.339083	-	-			-0.497288	0.649821	0.419121	-1.28865	-	-			0.730064	0.856799	0.687991	1.58453	-	-			0.173517	0.195947	0.869509	0.485463					0.232777	0.268375	0.836184	0.633994	-	-			-0.556555	0.775851	0.329331	-1.47765
C0HKG5;C0HKG6	Rnaset2a;Rnaset2b	Ribonuclease T2-A	Rnaset2a					-	-							-	-			0			0	-	-			NaN	NaN	NaN	NaN									-	-			NaN	NaN	NaN	NaN
D3YU50	Mybpc1	Myosin-binding protein C, slow-type	Mybpc1	0.556658	0.320035	0.893398	0.73925	-	-			-0.345654	0.208498	0.788796	-0.512062	-	-			-2.24066	2.64321	0.571111	-4.06344	-	+			-3.14296	3.22798	0.0409655	-5.47407		+			-2.58631	2.01649	0.128398	-3.27358	-	+			-0.902309	0.979542	0.232833	-1.78353
D3YX43	Vsig10	V-set and immunoglobulin domain-containing protein 10	Vsig10	-0.338981	0.408112	0.847979	-0.901637	-	-			-1.11997	2.68791	0.0186766	-4.12773	-	+			0.409974	0.484728	0.832534	1.0294	-	-			-0.371	0.32759	0.778903	-0.75361					-0.709995	0.811037	0.487321	-1.57236	-	-			-0.780971	1.39373	0.112371	-2.32264
D3YXJ5	Fam84b	Family with sequence similarity 84, member B	Fam84b	0.522343	0.451485	0.833193	1.0052	-	-			0.0113735	0.00560358	0.990677	0.0166504	-	-			0			0	-	-			NaN	NaN	NaN	NaN				+					-	-			-0.510977	0.369379	0.628263	-0.831521
D3YXK1	Samd1	Atherin	Samd1					-	-							-	-			0			0	-	-			NaN	NaN	NaN	NaN				+					-	-			0.41055	0.161236	0.823919	0.42301
D3YXK2	Safb	Scaffold attachment factor B1	Safb	0.548262	2.26356	0.401854	3.52959	+	-			0.289273	1.264	0.152462	2.15207	-	-			0.236768	1.048	0.631649	1.84703	-	-			-0.0222291	0.0541173	0.961816	-0.150828					0.526041	2.06232	0.121966	3.18631	+	-			-0.259	1.38682	0.113643	-2.3136
D3YZP9	Ccdc6	Coiled-coil domain-containing protein 6	Ccdc6	-0.55438	0.879996	0.649259	-1.64102	-	-			0.122876	0.20498	0.791181	0.504646	-	-			-0.544977	0.812916	0.701464	-1.54306	-	-			0.132297	0.110649	0.929353	0.294456					-0.422101	0.434608	0.728519	-0.948567	-	-			0.677273	1.70135	0.0684681	2.72115
D3YZZ5	Tmed7	Transmembrane p24-trafficking protein 7	Tmed7	0.838657	0.772096	0.695744	1.49547	-	-			0.21369	0.163556	0.831312	0.416011	-	-			-0.379703	0.340623	0.889464	-0.771907	-	-			-1.00468	1.04373	0.342293	-1.87393					-0.166013	0.0902696	0.938565	-0.244501	-	-			-0.624965	0.906724	0.263987	-1.66573
D3Z0M9	Ddx23	DEAD (Asp-Glu-Ala-Asp) box polypeptide 23	Ddx23	-0.0444249	0.0393369	0.979862	-0.111841	-	-			0.207392	0.306643	0.697088	0.710586	-	-			-0.121476	0.236699	0.927735	-0.570461	-	-			0.130334	0.161839	0.898625	0.412175					0.0859163	0.0859919	0.940246	0.233806	-	-			0.251821	0.481451	0.532399	1.01914
D3Z286	Tmppe	Transmembrane protein with metallophosphoesterase domain	Tmppe	0.00654809	0.00251315	0.993697	0.00760009	-	-			-0.185677	0.139983	0.853122	-0.365151	-	-			0.0843357	0.0591822	0.991254	0.164981	-	-			-0.107887	0.0451694	0.969021	-0.129467					-0.101341	0.0523911	0.962224	-0.148208	-	-			-0.19225	0.114609	0.873046	-0.30662
D3Z2H9	Tpm3-rs7	Uncharacterized protein	Tpm3-rs7	-0.725883	2.10508	0.413241	-3.31214	-	+			0.0532134	0.128062	0.862345	0.334048	-	-			-0.363736	0.334684	0.890835	-0.758626	-	-			0.415355	0.342574	0.767623	0.775511					-0.310523	0.250234	0.84269	-0.597863	-	-			0.779097	2.51665	0.0164643	3.7807	+
D3Z3L3	Trim12c	Tripartite motif-containing 12C	Trim12c	-0.0522618	0.0286771	0.986198	-0.0835901	-	-			0.0698578	0.0812608	0.913497	0.222696	-	-			-0.148078	0.24171	0.925994	-0.584599	-	-			-0.0259597	0.0166748	0.985112	-0.048942					-0.0782201	0.130966	0.917843	-0.345786	-	-			0.1221	0.083655	0.902371	0.228762
D3Z3N4	Hnrnph3	Heterogeneous nuclear ribonucleoprotein H3	Hnrnph3	-0.0522639	0.0403652	0.980012	-0.114324	-	-			-0.0412522	0.035098	0.962038	-0.0997167	-	-			-0.607071	0.518603	0.809571	-1.07627	-	-			-0.59606	0.449615	0.684809	-0.965319					-0.648323	0.410758	0.750742	-0.898102	-	-			0.0109976	0.0215658	0.970346	0.0621534
D3Z4S3	Ptrhd1	Putative peptidyl-tRNA hydrolase PTRHD1	Ptrhd1	-0.156994	0.173623	0.952267	-0.443966	-	-			0.209409	0.250855	0.748827	0.603249	-	-			0.044188	0.0482847	0.992287	0.136527	-	-			0.410625	0.689372	0.519783	1.42343					0.253597	0.251257	0.842319	0.610668	-	-			0.366433	0.715255	0.363868	1.42264
D3Z6P0	Pdia2	Protein disulfide-isomerase A2	Pdia2					-	-							-	-			0			0	-	-			NaN	NaN	NaN	NaN									-	-			NaN	NaN	NaN	NaN
D3Z6Q9	Bin2	Bridging integrator 2	Bin2					-	-			0.909831	0.795335	0.332708	1.57089	-	-			0.88944	0.839798	0.688531	1.58253	-	-			NaN	NaN	NaN	NaN			+		1.79927	1.47798	0.223133	2.64322	-	-			NaN	NaN	NaN	NaN
D3Z6V6	Enpp7	Ectonucleotide pyrophosphatase/phosphodiesterase 7	Enpp7					-	-							-	-			0			0	-	-			NaN	NaN	NaN	NaN				+					-	-			0.0743201	0.030201	0.960282	0.0873724
D3Z7X0	Acad12	Acyl-Coenzyme A dehydrogenase family, member 12	Acad12	0.202951	0.149959	0.957062	0.3854	-	-			-0.566959	0.616804	0.441368	-1.23753	-	-			-0.432497	0.520682	0.807701	-1.08943	-	-			-1.20243	1.50603	0.195233	-2.55016					-0.999457	0.965578	0.401727	-1.78308	-	-			-0.769924	1.15885	0.172224	-2.01197
D4AFX7	Dnajc13	DnaJ heat shock protein family (Hsp40) member C13	Dnajc13	0.165331	0.58782	0.782834	1.21687	-	-			0.371954	2.07743	0.041107	3.36166	+	-			-0.332759	0.613182	0.766656	-1.23188	-	-			-0.126166	0.166758	0.894119	-0.423139					0.0391951	0.0371455	0.973113	0.106218	-	-			0.20661	1.25025	0.145229	2.13386
E0CZ22	Mroh1	Maestro heat-like repeat family member 1	Mroh1					-	-			0.757439	0.795554	0.332675	1.57124	-	-			-0.567952	0.485861	0.831576	-1.05448	-	-			NaN	NaN	NaN	NaN			+		0.189487	0.0769978	0.941607	0.218776	-	-			NaN	NaN	NaN	NaN
E0CZ42	Fer1l6	Fer-1-like 6 (C. elegans)	Fer1l6					-	-							-	-			0			0	-	-			NaN	NaN	NaN	NaN									-	-			NaN	NaN	NaN	NaN
E2JF22	Piezo1	Piezo-type mechanosensitive ion channel component 1	Piezo1					-	-			1.2241	1.38924	0.124047	2.73964	-	-			0			0	-	-			NaN	NaN	NaN	NaN									-	-			NaN	NaN	NaN	NaN
E9PUL3	Clca3b	Chloride channel accessory 3B	Clca3b					-	-			1.14209	0.763325	0.351272	1.59113	-	-			0.550086	0.332072	0.892428	0.789657	-	-			NaN	NaN	NaN	NaN			+		1.69218	0.750012	0.52441	1.63292	-	-			NaN	NaN	NaN	NaN
E9PUR0	Ankhd1	Ankyrin repeat and KH domain-containing 1	Ankhd1	-0.396243	0.249172	0.930139	-0.618362	-	-			-0.167712	0.121561	0.865568	-0.321795	-	-			-0.853849	0.635695	0.763497	-1.29522	-	-			-0.625309	0.303557	0.794582	-0.731862					-1.02156	0.617986	0.604734	-1.37543	-	-			0.228525	0.155449	0.830475	0.399107
E9PV24	Fga	Fibrinogen alpha chain	Fga	-0.157772	0.234715	0.928027	-0.568119	-	-			2.86998	4.34009	0.00274286	6.47692	+	-			-0.889109	0.868275	0.685257	-1.60066	-	-			2.13867	2.99275	0.0562857	4.42689	+				1.98088	2.69074	0.0930566	4.0136	+	-			3.02777	4.65394	0.0004	7.01747	+
E9PV38	Ces2g	Carboxylic ester hydrolase	Ces2g	-0.377311	0.466347	0.824796	-1.03237	-	-			-1.82343	2.03865	0.0434724	-3.78296	-	+			0			0	-	-			NaN	NaN	NaN	NaN				+					-	-			-1.4461	1.30325	0.132855	-2.45068
E9PVA8	Gcn1	eIF-2-alpha kinase activator GCN1	Gcn1	0.268792	0.557633	0.790093	1.14994	-	-			0.510083	1.76946	0.0662139	2.80884	-	-			-0.292744	0.923193	0.657864	-1.68892	-	-			-0.0514835	0.0837914	0.94072	-0.227612					0.217339	0.509848	0.681014	1.07146	-	-			0.241255	0.583518	0.451168	1.18522
E9PVD3	Dchs1	Protocadherin-16	Dchs1					-	-							-	-			0			0	-	-			NaN	NaN	NaN	NaN									-	-			NaN	NaN	NaN	NaN
E9PVG8	9530053A07Rik	RIKEN cDNA 9530053A07 gene	9530053A07Rik	-0.641742	0.350809	0.885845	-0.807674	-	-			-2.98329	1.50925	0.10054	-2.69288	-	-			0			0	-	-			NaN	NaN	NaN	NaN				+					-	-			-2.34157	0.896229	0.268852	-1.92192
E9PVX6	Mki67	Proliferation marker protein Ki-67	Mki67	0.678502	0.963045	0.62955	1.77939	-	-			0.840423	2.06293	0.0420364	3.25473	+	-			-0.228648	0.952455	0.651562	-1.74506	-	-			-0.0667402	0.0832138	0.941157	-0.226821					0.611774	1.10181	0.33995	2.01143	-	-			0.161928	0.275466	0.710464	0.64794
E9PVZ8	Golgb1	Golgi autoantigen, golgin subfamily b, macrogolgin 1	Golgb1	0.0148239	0.0262706	0.986472	0.075504	-	-			-0.064748	0.209186	0.789277	-0.513509	-	-			-0.0627954	0.110524	0.9713	-0.29255	-	-			-0.142351	0.212639	0.856934	-0.522264					-0.127543	0.242484	0.848632	-0.583999	-	-			-0.0795524	0.159663	0.825686	-0.406224
E9PWG2	Trappc8	Trafficking protein particle complex 8	Trappc8	0.551903	0.559162	0.790827	1.15985	-	-			0.268671	0.329854	0.675681	0.754591	-	-			0.34771	0.442922	0.852446	0.963133	-	-			0.0644828	0.0452563	0.969074	0.128351					0.616381	0.513715	0.680572	1.10325	-	-			-0.283253	0.400063	0.603008	-0.879282
E9PWG6	Ncapg	Non-SMC condensin I complex, subunit G	Ncapg					-	-							-	-			0			0	-	-			NaN	NaN	NaN	NaN									-	-			NaN	NaN	NaN	NaN
E9PWP7	Muc3	Mucin 3, intestinal	Muc3	0.156573	0.104676	0.963039	0.284186	-	-							-	-			0			0	-	-			NaN	NaN	NaN	NaN				+					-	-			NaN	NaN	NaN	NaN
E9PWP9	4931408C20Rik	RIKEN cDNA 4931408C20 gene	4931408C20Rik					-	-							-	-			0			0	-	-			NaN	NaN	NaN	NaN				+					-	-			-0.1098	0.0947869	0.890621	-0.257875
E9PWQ3	Col6a3	Collagen, type VI, alpha 3	Col6a3	-0.358701	0.889523	0.647626	-1.6548	-	-			-0.131315	0.429176	0.592767	-0.930182	-	-			-0.432103	1.17878	0.594307	-2.02025	-	-			-0.204719	0.33075	0.775791	-0.753576					-0.563418	1.59185	0.195819	-2.5799	-	-			0.227353	0.505819	0.510686	1.05965
E9PWW9	Rsf1	Remodeling and spacing factor 1	Rsf1					-	-							-	-			0			0	-	-			NaN	NaN	NaN	NaN									-	-			NaN	NaN	NaN	NaN
E9PWZ3	Rpl3l	Ribosomal protein L3-like	Rpl3l	1.14929	0.365703	0.875023	0.844399	-	-			0.951959	0.336758	0.67102	0.780785	-	-			0			0	-	-			NaN	NaN	NaN	NaN				+					-	-			-0.197337	0.0550226	0.932236	-0.154006
E9PX68	Slc4a1ap	Solute carrier family 4 (anion exchanger), member 1, adaptor protein	Slc4a1ap					-	-			1.23854	1.14936	0.184439	2.28718	-	-			-0.873139	0.827989	0.690738	-1.70665	-	-			NaN	NaN	NaN	NaN			+		0.365397	0.268078	0.836427	0.670239	-	-			NaN	NaN	NaN	NaN
E9PX95	Abca17	ATP-binding cassette sub-family A member 17	Abca17	-1.11671	0.565369	0.791307	-1.19217	-	-			0.342343	0.749522	0.360019	1.47662	-	-			-0.462107	0.802056	0.70506	-1.55846	-	-			0.99697	0.477449	0.661872	1.03963					-0.119763	0.091956	0.938301	-0.25237	-	-			1.45907	1.13965	0.176736	2.03368
E9PXF8	Sbf2	SET-binding factor 2	Sbf2					-	-							-	-			-0.897352	2.03972	0.444	-4.12536	-	+			NaN	NaN	NaN	NaN			+						-	-			NaN	NaN	NaN	NaN
E9PY03	Tstd1	Thiosulfate sulfurtransferase (rhodanese)-like domain-containing 1	Tstd1	-0.264465	0.382733	0.863871	-0.861083	-	-			-1.88813	2.17823	0.0348652	-4.46107	-	+			0			0	-	-			NaN	NaN	NaN	NaN				+					-	-			-1.62363	2.64587	0.0132438	-4.68028		+
E9PY16	Adap1	ArfGAP with dual PH domains 1	Adap1	0.0947477	0.0467167	0.980219	0.134819	-	-			-0.269105	0.592698	0.456386	-1.23851	-	-			-0.451218	0.750313	0.729912	-1.49841	-	-			-0.815066	0.484565	0.656797	-1.08444					-0.720323	1.0272	0.371839	-2.18775	-	-			-0.36385	0.309945	0.681643	-0.723746
E9PYB0	Ahnak2	AHNAK nucleoprotein 2 (Fragment)	Ahnak2	-1.45701	1.37431	0.523644	-2.3274	-	-			-0.322735	0.74023	0.365577	-1.42512	-	-			-0.755961	1.93174	0.410072	-3.01778	-	-			0.378284	0.247437	0.834049	0.594057					-1.0787	2.5924	0.0902687	-3.99075	-	+			1.13425	1.12676	0.180771	1.96879
E9PYD1	Fam98c	Family with sequence similarity 98, member C	Fam98c	0.162707	0.289542	0.904847	0.67759	-	-			-0.831692	1.99302	0.0465516	-3.0968	-	-			0.402547	0.596018	0.77177	1.20496	-	-			-0.591833	1.0135	0.352418	-1.83149					-0.429145	0.639772	0.59155	-1.28069	-	-			-0.994409	2.59539	0.0144503	-3.88562		+
E9PYF4	Lmo7	LIM domain only 7	Lmo7	0.21874	0.596003	0.776737	1.21162	-	-			-0.260211	0.568393	0.472229	-1.16117	-	-			0.172662	0.260291	0.91853	0.616357	-	-			-0.306281	0.565975	0.594817	-1.15731					-0.0875489	0.109204	0.928307	-0.289381	-	-			-0.478938	1.78256	0.0583193	-2.82571
E9PYF7	Ap1ar	AP1AR	Ap1ar	0.272137	0.263262	0.919556	0.640644	-	-							-	-			0			0	-	-			NaN	NaN	NaN	NaN				+					-	-			NaN	NaN	NaN	NaN
E9PYH6	Setd1a	SET domain-containing 1A	Setd1a					-	-			-0.102369	0.0545663	0.944248	-0.154967	-	-			0			0	-	-			NaN	NaN	NaN	NaN									-	-			NaN	NaN	NaN	NaN
E9PYK3	Parp4	Poly [ADP-ribose] polymerase	Parp4	0.322822	0.407978	0.847878	0.901398	-	-			0.320082	0.482388	0.542609	1.02545	-	-			-0.483621	0.640437	0.764024	-1.27419	-	-			-0.48635	0.553727	0.604641	-1.14359					-0.163539	0.11803	0.925896	-0.312165	-	-			-0.00273305	0.0044831	0.991824	-0.0131669
E9PYP2	Nbeal1	Neurobeachin-like 1	Nbeal1	0.0623945	0.0468876	0.980254	0.136985	-	-			-0.0342134	0.0351089	0.962201	-0.102505	-	-			0			0	-	-			NaN	NaN	NaN	NaN				+					-	-			-0.0965745	0.0964569	0.889396	-0.266033
E9PZ26	Brd1	Bromodomain-containing 1	Brd1					-	-			1.4251	0.776813	0.343125	1.54115	-	-			0			0	-	-			NaN	NaN	NaN	NaN									-	-			NaN	NaN	NaN	NaN
E9PZJ8	Ascc3	Activating signal cointegrator 1 complex subunit 3	Ascc3					-	-			0.479415	0.243729	0.753703	0.591496	-	-			0			0	-	-			NaN	NaN	NaN	NaN									-	-			NaN	NaN	NaN	NaN
E9PZM4	Chd2	Chromodomain-helicase-DNA-binding protein 2	Chd2	0.0509071	0.0228703	0.98839	0.0670745	-	-			-0.09623	0.0728268	0.924013	-0.202061	-	-			0			0	-	-			NaN	NaN	NaN	NaN				+					-	-			-0.14717	0.0721969	0.915514	-0.20043
E9PZM7	Scaf11	SR-related CTD-associated factor 11	Scaf11	-0.114082	0.174493	0.951527	-0.445914	-	-			-0.286628	1.05813	0.215863	-1.89408	-	-			-0.119162	0.195659	0.944137	-0.487885	-	-			-0.29175	0.328086	0.778971	-0.771305					-0.40579	0.679461	0.57112	-1.38293	-	-			-0.172572	0.356525	0.639382	-0.80782
E9PZP8	Herc1	HECT and RLD domain-containing E3 ubiquitin protein ligase family member 1	Herc1					-	-							-	-			0			0	-	-			NaN	NaN	NaN	NaN									-	-			NaN	NaN	NaN	NaN
E9Q0B5	Fcgbp	Fc fragment of IgG-binding protein	Fcgbp	-1.23292	4.07226	0.32	-6.33934	-	+			-2.26561	2.41071	0.0257113	-3.64058	-	+			0.500017	0.308602	0.899511	0.709856	-	-			-0.532662	0.535486	0.617251	-1.1082					-1.76559	2.38436	0.101388	-3.6059	-	+			-1.0327	0.915757	0.260227	-1.67846
E9Q0F0	Krt78	Keratin 78	Krt78	-0.557234	0.309337	0.897695	-0.715739	-	-			-0.678314	0.649422	0.419364	-1.28803	-	-			0.551299	0.704612	0.742989	1.3918	-	-			0.430209	0.221856	0.85153	0.54595					-0.127015	0.0686856	0.948967	-0.190427	-	-			-0.121074	0.0724446	0.915353	-0.198388
E9Q137	Tex264	Testis-expressed gene 264	Tex264	-0.655983	0.470187	0.822168	-1.02676	-	-			-0.444752	0.24095	0.755233	-0.579111	-	-			1.11126	0.664105	0.754967	1.31053	-	-			1.3225	0.776981	0.461743	1.54142					0.666506	0.476403	0.707056	1.01533	-	-			0.211266	0.0732446	0.914692	0.202206
E9Q166	Atad2b	ATPase family, AAA domain-containing 2B	Atad2b	0.475362	0.364504	0.875696	0.818741	-	-			0.50378	0.423941	0.595162	0.921105	-	-			-0.941312	0.499708	0.821523	-1.04954	-	-			-0.912883	0.434702	0.690463	-0.943761					-0.437532	0.176883	0.892567	-0.445493	-	-			0.028436	0.0187687	0.972479	0.054256
E9Q1F5	Myo5c	Myosin VC	Myo5c	0.0152966	0.0262409	0.986332	0.0758938	-	-			-0.678869	1.1772	0.176673	-2.05901	-	-			0.399448	0.443776	0.85289	0.964625	-	-			-0.29471	0.415111	0.70707	-0.927579					-0.279421	0.487407	0.697788	-1.05721	-	-			-0.69416	1.10629	0.186412	-1.96112
E9Q1P8	Irf2bp2	Interferon regulatory factor 2-binding protein 2	Irf2bp2	-0.361746	0.328233	0.892714	-0.751547	-	-			0.0796609	0.201861	0.794377	0.498045	-	-			0.0451869	0.105342	0.974485	0.280074	-	-			0.486583	0.473116	0.662721	1.00975					0.124848	0.219197	0.860174	0.536002	-	-			0.44139	0.501613	0.513822	1.0527
E9Q1W3	Neb	Nebulin	Neb	0.627518	0.395936	0.856623	0.879797	-	-			-0.41196	0.244547	0.753239	-0.586397	-	-			-1.29221	1.23943	0.583796	-2.14426	-	-			-2.33168	2.65841	0.0691268	-4.43042		+			-1.70417	1.37412	0.25099	-2.36499	-	-			-1.03949	0.953329	0.2433	-1.7463
E9Q1Z0	Krt90	Keratin 90	Krt90					-	-			0.183927	0.0620493	0.935024	0.173904	-	-			0			0	-	-			NaN	NaN	NaN	NaN									-	-			NaN	NaN	NaN	NaN
E9Q238	Kank1	KN motif and ankyrin repeat domains 1	Kank1					-	-			1.35657	2.26	0.0312444	3.95518	+	-			0			0	-	-			NaN	NaN	NaN	NaN									-	-			NaN	NaN	NaN	NaN
E9Q2E4	Hectd4	HECT domain E3 ubiquitin protein ligase 4	Hectd4					-	-							-	-			0			0	-	-			NaN	NaN	NaN	NaN				+					-	-			-0.113266	0.073577	0.914566	-0.205259
E9Q2I4	Elmsan1	ELM2 and Myb/SANT-like domain-containing 1	Elmsan1					-	-							-	-			0			0	-	-			NaN	NaN	NaN	NaN									-	-			NaN	NaN	NaN	NaN
E9Q2M9	Wdfy4	WD repeat and FYVE domain-containing 4	Wdfy4					-	-							-	-			0			0	-	-			NaN	NaN	NaN	NaN									-	-			NaN	NaN	NaN	NaN
E9Q309	Cep350	Centrosome-associated protein 350	Cep350					-	-							-	-			0			0	-	-			NaN	NaN	NaN	NaN									-	-			NaN	NaN	NaN	NaN
E9Q394	Akap13	A-kinase anchor protein 13	Akap13	0.318411	0.42559	0.840544	0.932684	-	-			0.0893064	0.139124	0.853816	0.360601	-	-			0.0309637	0.0484701	0.99286	0.136545	-	-			-0.198166	0.237626	0.838328	-0.57889					0.12027	0.138365	0.91701	0.363211	-	-			-0.229102	0.40849	0.596375	-0.894123
E9Q3A7	Cdh19	Cadherin 19, type 2	Cdh19					-	-			0.160698	0.61462	0.441857	1.32376	-	-			0			0	-	-			NaN	NaN	NaN	NaN									-	-			NaN	NaN	NaN	NaN
E9Q3E1	Aldh3b2	Aldehyde dehydrogenase family 3 member B2	Aldh3b2	0.155865	0.0485182	0.97963	0.13977	-	-			2.4699	1.02732	0.227398	2.18798	-	-			0			0	-	-			NaN	NaN	NaN	NaN				+					-	-			2.31406	0.998543	0.225561	2.01242
E9Q3G8	Nup153	Nucleoporin 153	Nup153	-0.355257	0.535511	0.790046	-1.12954	-	-			0.212104	0.830153	0.316139	1.5684	-	-			0.0548908	0.126793	0.969805	0.33108	-	-			0.622223	1.10269	0.319428	1.98093					0.266995	0.762097	0.51654	1.48024	-	-			0.567354	1.19721	0.159695	2.08649
E9Q3H6	Coq10a	Coenzyme Q10A	Coq10a					-	-							-	-			0			0	-	-			NaN	NaN	NaN	NaN				+					-	-			NaN	NaN	NaN	NaN
E9Q3L2	Pi4ka	Phosphatidylinositol 4-kinase alpha	Pi4ka	0.129028	0.166223	0.952447	0.42195	-	-			-0.0148828	0.0284705	0.968338	-0.0814503	-	-			-0.4315	1.85364	0.410431	-2.91719	-	-			-0.575383	1.16039	0.300984	-2.03589					-0.446383	1.35625	0.255087	-2.30298	-	-			-0.14389	0.225454	0.760494	-0.547394
E9Q409	Prss32	Protease, serine 32	Prss32	-0.141635	0.156725	0.954318	-0.400702	-	-			-0.382362	0.495742	0.531641	-1.04297	-	-			0.40959	0.359631	0.882242	0.804267	-	-			0.168897	0.122318	0.921276	0.320575					0.0272288	0.0192536	0.984557	0.0556285	-	-			-0.240717	0.241271	0.743216	-0.579761
E9Q411	Nbas	Neuroblastoma-amplified sequence	Nbas	0.403577	0.569838	0.789708	1.19978	-	-			0.456304	0.752539	0.357987	1.46564	-	-			-0.260979	0.352265	0.886089	-0.799914	-	-			-0.20827	0.238437	0.838748	-0.584051					0.195324	0.315318	0.812596	0.746072	-	-			0.0527375	0.0555663	0.93125	0.155006
E9Q414	Apob	Apolipoprotein B-100	Apob					-	-							-	-		+	0.523502	0.240235	0.927367	0.592533	-	-			NaN	NaN	NaN	NaN			+						-	-		+	NaN	NaN	NaN	NaN
E9Q438	Olfr749	Olfactory receptor	Olfr749					-	-							-	-			0			0	-	-			NaN	NaN	NaN	NaN									-	-			NaN	NaN	NaN	NaN
E9Q4N7	Arid1b	AT-rich interactive domain-containing protein 1B	Arid1b	0.885946	0.950881	0.629559	1.81752	-	-			0.12921	0.0701338	0.926386	0.193484	-	-			0.270764	0.129236	0.969483	0.338684	-	-			-0.486005	0.281688	0.809526	-0.672609					0.399974	0.250858	0.842276	0.61485	-	-			-0.756737	0.540683	0.484258	-1.12232
E9Q4Z2	Acacb	Acetyl-CoA carboxylase 2	Acacb	0.42891	0.170957	0.951867	0.441093	-	-			0.243101	0.12974	0.861837	0.339866	-	-			0			0	-	-			NaN	NaN	NaN	NaN				+					-	-			-0.185779	0.138002	0.847411	-0.359135
E9Q512	Trip11	Thyroid hormone receptor interactor 11	Trip11	-0.219598	0.267512	0.917317	-0.639915	-	-			-0.193008	0.290399	0.710173	-0.682027	-	-			-0.652722	0.838312	0.687916	-1.58035	-	-			-0.626147	0.668056	0.531534	-1.3347					-0.84573	0.893037	0.447612	-1.72636	-	-			0.0265761	0.0296229	0.960666	0.0846444
E9Q555	Rnf213	E3 ubiquitin-protein ligase RNF213	Rnf213	0.0312147	0.0290441	0.986072	0.083753	-	-			0.560955	3.00502	0.0141436	4.78919	+	-			-0.395531	1.07111	0.62044	-1.89338	-	-			0.1342	0.144096	0.913208	0.372027					0.165424	0.241157	0.849363	0.586193	-	-			0.529714	1.09494	0.190728	1.92576
E9Q557	Dsp	Desmoplakin	Dsp	-0.608893	1.382	0.517613	-2.3378	-	-			-0.27416	0.77633	0.343348	-1.47836	-	-			0.0666283	0.0968049	0.975043	0.258776	-	-			0.401369	0.632277	0.554732	1.26158					-0.207532	0.416648	0.742661	-0.908405	-	-			0.334755	0.567047	0.461838	1.15902
E9Q5K9	Ythdc1	YTH domain-containing protein 1	Ythdc1	0.286224	0.299549	0.899341	0.708213	-	-			0.133189	0.200198	0.795191	0.495919	-	-			0.244263	0.530411	0.8012	1.11229	-	-			0.0912247	0.0927945	0.938017	0.254487					0.377452	0.441081	0.725787	0.97471	-	-			-0.153061	0.268796	0.717236	-0.639355
E9Q634	Myo1e	Unconventional myosin-Ie	Myo1e	-0.08721	0.107733	0.964345	-0.286545	-	-			0.128704	0.586169	0.458958	1.18942	-	-			-0.344417	1.24168	0.5836	-2.12249	-	-			-0.128516	0.150913	0.907854	-0.387566					-0.215713	0.518177	0.677311	-1.08528	-	-			0.215901	0.360977	0.636053	0.809235
E9Q6D8	C6	Complement component 6	C6					-	-							-	-			0			0	-	-			NaN	NaN	NaN	NaN									-	-			NaN	NaN	NaN	NaN
E9Q6E5	Srsf11	Serine/arginine-rich-splicing factor 11	Srsf11	0.323943	0.213135	0.937522	0.53458	-	-			0.028491	0.0298962	0.966872	0.0870328	-	-			0			0	-	-			NaN	NaN	NaN	NaN				+					-	-			-0.29548	0.241946	0.743041	-0.587821
E9Q6H8	Plekha5	Pleckstrin homology domain-containing, family A member 5	Plekha5	0.164261	0.273445	0.915637	0.646055	-	-			-0.302847	0.791304	0.334898	-1.50025	-	-			-0.275554	0.439985	0.849868	-0.952931	-	-			-0.742663	1.22121	0.280329	-2.14948					-0.578401	1.01135	0.379013	-1.84956	-	-			-0.467083	1.13505	0.178031	-1.97996
E9Q6J5	Bod1l	Biorientation of chromosomes in cell division protein 1-like 1	Bod1l	0.337719	0.421377	0.843352	0.949588	-	-			0.552028	1.00127	0.236226	1.86145	-	-			0.528874	1.07405	0.618908	1.97016	-	-			0.743175	1.2363	0.274056	2.33758					1.0809	1.28346	0.279818	2.41715	-	-			0.214309	0.654519	0.399906	1.32566
E9Q6R7	Utrn	Utrophin	Utrn	0.0196333	0.0255544	0.986608	0.0735016	-	-			0.21042	0.653655	0.415875	1.29453	-	-			-0.569182	1.46936	0.500721	-2.39324	-	-			-0.378362	0.588183	0.582711	-1.1926					-0.358762	0.823851	0.480114	-1.54748	-	-			0.190795	0.304762	0.684773	0.704574
E9Q735	Ube4a	Ubiquitin conjugation factor E4 A	Ube4a	-0.20481	0.141735	0.959183	-0.377139	-	-			0.539616	0.793984	0.333516	1.52866	-	-			-0.509534	1.10441	0.605219	-1.98338	-	-			0.2349	0.25545	0.828215	0.631708					0.0300827	0.0218586	0.985454	0.0641767	-	-			0.744414	1.48374	0.0963879	2.57582
E9Q784	Zc3h13	Zinc finger CCCH domain-containing protein 13	Zc3h13	-0.785425	1.11294	0.58439	-2.02796	-	-			-0.556092	0.701952	0.384996	-1.37674	-	-			0.576118	0.715168	0.743413	1.39687	-	-			0.805461	1.10275	0.319764	2.01283					0.0200256	0.0127754	0.985968	0.0374911	-	-			0.229346	0.367833	0.629702	0.824814
E9Q7D5	Arhgef5	Rho guanine nucleotide exchange factor 5	Arhgef5	0.465414	0.752451	0.705607	1.53026	-	-			0.113706	0.119688	0.867709	0.316117	-	-			0.492143	0.625648	0.763501	1.27889	-	-			0.140475	0.202403	0.865105	0.516581					0.605849	1.17155	0.315667	2.32813	-	-			-0.351697	0.44633	0.562596	-0.969081
E9Q7E2	Arid2	AT-rich interactive domain-containing protein 2	Arid2					-	-							-	-			-0.506417	1.41923	0.506985	-2.79793	-	-			NaN	NaN	NaN	NaN			+						-	-			NaN	NaN	NaN	NaN
E9Q7M2	Tsc22d2	TSC22 domain family, member 2	Tsc22d2					-	-							-	-			0.30736	0.170457	0.956049	0.436861	-	-			NaN	NaN	NaN	NaN			+						-	-			NaN	NaN	NaN	NaN
E9Q7P9	Cdhr2	Cadherin-related family member 2	Cdhr2	-0.963828	1.30443	0.550356	-2.31103	-	-			-1.12845	2.00675	0.0460104	-3.17842	-	+			0.550616	0.420859	0.861129	0.919584	-	-			0.38602	0.218549	0.854057	0.538972					-0.57783	0.38616	0.766683	-0.867374	-	-			-0.16458	0.154264	0.8308	-0.395151
E9Q8D0	Dnajc21	DnaJ homolog subfamily C member 21	Dnajc21					-	-	+		0.500521	0.418937	0.599439	0.934565	-	-			0			0	-	-	+		NaN	NaN	NaN	NaN									-	-	+		NaN	NaN	NaN	NaN
E9Q8I7	Nfxl1	Nuclear transcription factor, X-box-binding-like 1	Nfxl1					-	-			0.293424	0.255209	0.744544	0.618808	-	-			-0.146408	0.10083	0.975134	-0.272891	-	-			NaN	NaN	NaN	NaN			+		0.147016	0.0470777	0.96563	0.137515	-	-			NaN	NaN	NaN	NaN
E9Q8I9	Fry	Protein furry homolog	Fry					-	-							-	-			0			0	-	-			NaN	NaN	NaN	NaN									-	-			NaN	NaN	NaN	NaN
E9Q8T7	Dnah1	Dynein heavy chain 1, axonemal	Dnah1	-0.46597	0.39549	0.857237	-0.914791	-	-			0.409389	0.865294	0.29959	1.68243	-	-			-0.11018	0.109184	0.972363	-0.295314	-	-			0.765167	0.480766	0.660407	1.10657					0.299209	0.250432	0.842898	0.621045	-	-			0.875373	1.14718	0.17527	2.18816
E9Q912	Rap1gds1	RAP1, GTP-GDP dissociation stimulator 1	Rap1gds1	0.131759	0.187495	0.946187	0.470212	-	-			0.458636	1.88206	0.0546707	3.00989	-	-			-0.559531	0.865555	0.685962	-1.62008	-	-			-0.23264	0.215424	0.855066	-0.529993					-0.100895	0.0853182	0.94041	-0.232962	-	-			0.326885	0.801317	0.315869	1.51483
E9Q9B7	Kidins220	Kinase D-interacting substrate 220	Kidins220	0.182028	0.094743	0.965833	0.257765	-	-			-0.271703	0.216729	0.782101	-0.535122	-	-			0			0	-	-			NaN	NaN	NaN	NaN				+					-	-			-0.453737	0.32057	0.672349	-0.74027
E9Q9K5	Trdn	Triadin	Trdn	0.240604	0.164212	0.952839	0.420549	-	-			0.0763117	0.056376	0.94102	0.15714	-	-			0			0	-	-			NaN	NaN	NaN	NaN				+					-	-			-0.164309	0.108759	0.878398	-0.290979
E9Q9P8;Q8K5C8	Rdh16f1;Rdh9	RDH16 family member 1	Rdh16f1					-	-							-	-			0			0	-	-			NaN	NaN	NaN	NaN									-	-			NaN	NaN	NaN	NaN
E9QA15	Cald1	Caldesmon 1	Cald1	-0.302161	0.529852	0.793703	-1.10455	-	-			0.0649092	0.100098	0.89013	0.267345	-	-			-0.252967	0.432515	0.854044	-0.932643	-	-			0.11411	0.1471	0.910635	0.37791					-0.188058	0.246483	0.844628	-0.590308	-	-			0.367067	0.905962	0.264287	1.66465
E9QAB6	Ptar1	Protein prenyltransferase alpha subunit repeat-containing 1	Ptar1					-	-			0.23178	0.972863	0.248953	1.89811	-	-			-0.897982	1.58904	0.435896	-2.94556	-	-			NaN	NaN	NaN	NaN			+		-0.666202	0.768771	0.51187	-1.66968	-	-			NaN	NaN	NaN	NaN
E9QAE3	Btaf1	B-TFIID TATA-box-binding protein-associated factor 1	Btaf1	-0.0832145	0.0480765	0.97995	-0.135966	-	-			0.828476	0.660398	0.410338	1.32264	-	-			-0.142681	0.117498	0.973285	-0.310894	-	-			0.769034	1.05138	0.338202	1.93637					0.685795	0.452113	0.721475	1.00635	-	-			0.911705	1.25566	0.144136	2.14103
E9QAN8	Pik3c2b	Phosphatidylinositol-4-phosphate 3-kinase catalytic subunit type 2 beta	Pik3c2b					-	-							-	-			0			0	-	-			NaN	NaN	NaN	NaN									-	-			NaN	NaN	NaN	NaN
E9QAP7	Taf4	TATA-box-binding protein-associated factor 4	Taf4					-	-							-	-			0			0	-	-			NaN	NaN	NaN	NaN									-	-			NaN	NaN	NaN	NaN
F2Z3U3	Raph1	Ras association (RalGDS/AF-6) and pleckstrin homology domains 1	Raph1	-0.644615	0.53311	0.791139	-1.11678	-	-			-1.23659	1.58341	0.0889099	-2.60874	-	-			1.57004	1.60895	0.430452	2.69469	-	-			0.97808	0.70062	0.511826	1.39944					0.333444	0.181217	0.890265	0.456505	-	-			-0.59197	0.832847	0.300279	-1.58713
F2Z472	Svs3a	Seminal vesicle secretory protein 3A	Svs3a	0.696838	0.254819	0.925059	0.61421	-	-			-2.39606	1.36761	0.128297	-2.31835	-	-			0			0	-	-			NaN	NaN	NaN	NaN				+					-	-			-3.09292	3.01221	0.00729412	-4.60525		+
F6ZDS4	Tpr	Nucleoprotein TPR	Tpr	0.20006	0.33904	0.888019	0.771771	-	-			0.229968	0.665993	0.406199	1.31342	-	-			-0.0937241	0.229345	0.926286	-0.554033	-	-			-0.063841	0.0974488	0.935385	-0.260875					0.136244	0.225234	0.858944	0.546939	-	-			0.0299022	0.0641849	0.92417	0.177149
F7BJK1	Pcdh1	Protocadherin 1 (Fragment)	Pcdh1	0.013852	0.0057816	0.993248	0.0171	-	-			-0.414861	0.354031	0.654419	-0.807807	-	-			0.281587	0.173703	0.953353	0.441786	-	-			-0.147075	0.0588041	0.958778	-0.164569					-0.133274	0.0666103	0.949515	-0.187022	-	-			-0.4287	0.260742	0.725157	-0.620825
F7BWT7	Tspan15	Tetraspanin-15	Tspan15	0.899347	1.05701	0.596783	2.11827	-	-			-0.406725	0.658597	0.411668	-1.37086	-	-			0			0	-	-			NaN	NaN	NaN	NaN				+					-	-			-1.30606	2.02971	0.0385942	-3.5504		+
F8VPK0	Ttc37	Tetratricopeptide repeat domain 37	Ttc37	0.244886	0.279795	0.910266	0.664504	-	-			0.271686	1.35269	0.132266	2.33486	-	-			0.109813	0.322286	0.896559	0.740339	-	-			0.136633	0.153577	0.905985	0.394863					0.381499	1.16334	0.319872	2.14961	-	-			0.0267907	0.0337966	0.956665	0.0961493
F8VPN4	Agl	Amylo-1,6-glucosidase, 4-alpha-glucanotransferase	Agl	0.344387	0.372507	0.870592	0.833314	-	-			-0.290822	0.346855	0.661283	-0.783402	-	-			-0.997054	1.53358	0.474796	-2.47416	-	-			-1.6323	2.42969	0.0782018	-3.66562		+			-1.28788	1.84516	0.148756	-2.90628	-	-			-0.635245	0.930668	0.253013	-1.69941
F8VPP8	Zc3h7b	Zinc finger CCCH type-containing 7B	Zc3h7b	0.653147	0.269728	0.918962	0.653981	-	-			1.21129	0.448493	0.575208	0.988041	-	-			-0.852614	0.330502	0.893875	-0.763299	-	-			-0.2945	0.115564	0.924483	-0.308931					0.358672	0.084219	0.940006	0.234737	-	-			0.5581	0.304797	0.684899	0.71001
F8VPQ6	Alpi	Alkaline phosphatase	Alpi					-	-							-	-			0			0	-	-			NaN	NaN	NaN	NaN				+					-	-			NaN	NaN	NaN	NaN
F8VPU2	Farp1	FERM, ARHGEF and pleckstrin domain-containing protein 1	Farp1	0.341923	0.533954	0.791015	1.15384	-	-			0.145596	0.232813	0.763613	0.568892	-	-			-0.707297	1.22131	0.593458	-2.24004	-	-			-0.90365	1.22279	0.280296	-2.42334					-0.561701	0.733096	0.535926	-1.53705	-	-			-0.196366	0.325248	0.669328	-0.753251
F8VQ05	Fryl	FRY-like transcription coactivator	Fryl	0.17243	0.303213	0.898089	0.71065	-	-			0.116409	0.208259	0.788634	0.514836	-	-			-0.0962904	0.11743	0.972914	-0.311914	-	-			-0.152285	0.17799	0.882918	-0.453726					0.020119	0.0178126	0.984957	0.0522169	-	-			-0.0559928	0.12643	0.861152	-0.332084
F8VQC1	Srp72	Signal recognition particle subunit SRP72	Srp72	0.0327082	0.0604691	0.975324	0.167881	-	-			0.339478	1.01068	0.232561	1.81061	-	-			-0.296514	0.856344	0.687077	-1.58388	-	-			0.0102312	0.0180695	0.983936	0.0522746					0.0429637	0.0756126	0.942596	0.206453	-	-			0.306731	0.978752	0.233037	1.76648
F8VQK3	Gucy1a2	Guanylate cyclase 1, soluble, alpha 2	Gucy1a2					-	-							-	-			0			0	-	-			NaN	NaN	NaN	NaN									-	-			NaN	NaN	NaN	NaN
F8VQM5	Sis	Sucrase isomaltase (alpha-glucosidase)	Sis					-	-							-	-			0			0	-	-			NaN	NaN	NaN	NaN									-	-			NaN	NaN	NaN	NaN
G3UW81	Cyp4f40	Cytochrome P450, family 4, subfamily f, polypeptide 40	Cyp4f40	0.310788	0.24342	0.92971	0.599248	-	-			0.232509	0.172448	0.822798	0.441332	-	-			0.601968	0.557813	0.790364	1.17927	-	-			0.52368	0.477088	0.66181	1.05189					0.834476	1.00374	0.382597	2.13951	-	-			-0.0782698	0.0578807	0.928911	-0.161556
G3UW82	Myh2	MCG140437, isoform CRA_d	Myh2	0.578556	0.401808	0.853005	0.890353	-	-			0.457546	0.269017	0.730191	0.635261	-	-			-1.03795	0.758928	0.726267	-1.46287	-	-			-1.15896	1.10467	0.319898	-2.01567					-0.580408	0.328596	0.803784	-0.755516	-	-			-0.121017	0.0733226	0.914719	-0.201101
G3X8U3	2210016F16Rik	Queuosine salvage protein	2210016F16Rik	-0.30848	0.640991	0.755796	-1.2826	-	-			-0.280856	0.834935	0.313924	-1.56345	-	-			-0.0525816	0.0958365	0.975351	-0.256924	-	-			-0.0249494	0.0332328	0.978217	-0.0948172					-0.333438	0.671584	0.577022	-1.33012	-	-			0.0276026	0.0508649	0.935654	0.14222
G3X8X0	Dhx16	DEAH (Asp-Glu-Ala-His) box polypeptide 16	Dhx16	0.879209	1.00226	0.612965	1.89812	-	-			0.217294	0.279611	0.720596	0.660824	-	-			0.827986	1.98923	0.4148	3.09191	-	-			0.166066	0.176259	0.884738	0.445605					1.04528	3.47992	0.098	5.97864	+	-			-0.661929	0.81961	0.306477	-1.55292
G3X939	Slc9a3	Sodium/hydrogen exchanger 3	Slc9a3	-0.0191568	0.0195997	0.989219	-0.0573446	-	-			-0.526265	0.456014	0.568449	-1.05746	-	-			0			0	-	-			NaN	NaN	NaN	NaN				+					-	-			-0.507117	0.934801	0.251081	-1.79223
G3X972	Sec24c	SEC24 related gene family, member C (S. cerevisiae), isoform CRA_a	Sec24c	-0.5006	0.984284	0.617602	-1.79025	-	-			0.164152	0.600569	0.451878	1.21212	-	-			-0.0404412	0.0607021	0.990923	-0.167772	-	-			0.624329	1.02509	0.349934	1.83045					0.12371	0.17585	0.892516	0.442023	-	-			0.664757	1.76295	0.0608834	2.80047
G3X982	Aox3	Aldehyde oxidase 3	Aox3					-	-							-	-			-0.247209	0.246351	0.922947	-0.594086	-	-			1.35482	1.48547	0.199891	2.76359									-	-			1.60203	3.71753	0.0032	6.04509	+
G3X987	Gimap9	GTPase, IMAP family member 9	Gimap9					-	-							-	-			0			0	-	-			NaN	NaN	NaN	NaN									-	-			NaN	NaN	NaN	NaN
G3X9B1	Heatr1	HEAT repeat-containing 1	Heatr1					-	-			0.928692	1.59201	0.0870396	2.8251	-	-			-0.00600147	0.00378971	1	-0.0112839	-	-			NaN	NaN	NaN	NaN			+		0.92269	0.501886	0.686169	1.14827	-	-			NaN	NaN	NaN	NaN
G3X9C2	Nccrp1	F-box only protein 50	Nccrp1	0.254633	0.178199	0.949435	0.454191	-	-			-0.317568	0.129352	0.861451	-0.340267	-	-			1.18169	0.471873	0.837931	1.02976	-	-			0.609487	0.340511	0.769451	0.795648					0.864119	0.405931	0.752241	0.935006	-	-			-0.57218	0.304071	0.68488	-0.708607
G3X9G9	Mettl7a3	MCG123521, isoform CRA_a	Mettl7a3					-	-							-	-			0			0	-	-			NaN	NaN	NaN	NaN									-	-			NaN	NaN	NaN	NaN
G3X9J0	Sipa1l3	Signal-induced proliferation-associated 1-like protein 3	Sipa1l3	0.112821	0.144641	0.958727	0.380421	-	-			-0.210154	0.274107	0.725399	-0.657333	-	-			0			0	-	-			NaN	NaN	NaN	NaN				+					-	-			-0.32294	0.694975	0.375062	-1.40839
G3X9K3	Arfgef1	Brefeldin A-inhibited guanine nucleotide-exchange protein 1	Arfgef1	0.770121	1.28882	0.550674	2.288	-	-			0.349875	0.557379	0.481396	1.14952	-	-			0.574924	1.30967	0.549439	2.23987	-	-			0.15466	0.232136	0.842998	0.567482					0.924798	1.4252	0.235339	2.48924	-	-			-0.420255	1.06233	0.202456	-1.89995
G3X9V8	Serpinb3a	MCG129038	Serpinb3a	-0.829056	0.489913	0.816563	-1.06161	-	-			-0.873734	0.470078	0.555415	-1.00459	-	-			1.58608	0.93609	0.6541	1.73999	-	-			1.54143	1.09492	0.320724	2.10099					0.712348	0.441292	0.726433	0.975092	-	-			-0.0446747	0.0163235	0.975969	-0.0475526
G3X9Y6	Akr1c19	Aldo-keto reductase family 1, member C19	Akr1c19	0.34425	1.16243	0.572222	2.0387	-	-			-1.00695	2.58675	0.0201419	-3.87407	-	+			0.298565	0.306494	0.901658	0.705864	-	-			-1.05265	1.58307	0.181314	-2.56856					-0.708381	0.935538	0.420957	-1.70624	-	-			-1.35121	3.64917	0.00383158	-5.37722		+
G3X9Z4	Pcf11	Cleavage and polyadenylation factor subunit homolog (S. cerevisiae)	Pcf11					-	-							-	-			0.0413437	0.0610234	0.99074	0.172237	-	-			0.471917	2.44337	0.0764486	5.15403	+								-	-			0.430571	1.07349	0.199015	2.00946
G5E829	Atp2b1	Plasma membrane calcium-transporting ATPase 1	Atp2b1	0.121135	0.437737	0.839957	0.949033	-	-			-0.163854	0.586159	0.458791	-1.1894	-	-			-0.13235	0.287289	0.908821	-0.669141	-	-			-0.417359	1.19542	0.286888	-2.06091					-0.296204	0.682728	0.568041	-1.33888	-	-			-0.284988	1.69403	0.068799	-2.71171
G5E870	Trip12	E3 ubiquitin-protein ligase TRIP12	Trip12	0.251076	0.250794	0.929083	0.605995	-	-			0.451274	1.17375	0.177358	2.05428	-	-			-0.124819	0.374371	0.879869	-0.840665	-	-			0.0753901	0.0670014	0.954049	0.186907					0.326455	0.512603	0.680366	1.10131	-	-			0.200197	0.28782	0.699972	0.674239
G5E895	Akr1b10	Aldo-keto reductase family 1, member B10 (aldose reductase)	Akr1b10	-0.374955	0.493834	0.814077	-1.04472	-	-			-0.056508	0.0925856	0.899753	-0.248925	-	-			-0.422566	0.767921	0.719562	-1.46601	-	-			-0.104117	0.0949657	0.935416	-0.255401					-0.479074	0.964553	0.402255	-1.76227	-	-			0.318455	0.40339	0.600049	0.885152
G5E897	Kdelc2	KDEL (Lys-Asp-Glu-Leu) containing 2, isoform CRA_b	Kdelc2	0.600157	0.510036	0.803678	1.11123	-	-			0.860354	1.51749	0.0994667	2.62582	-	-			-0.134974	0.169607	0.956109	-0.432651	-	-			0.125224	0.0864963	0.939577	0.238521					0.72538	1.2704	0.285364	2.39507	-	-			0.260174	0.224651	0.761403	0.551826
G5E8J6	Hrc	Histidine rich calcium binding protein, isoform CRA_a	Hrc	0.355869	0.333564	0.889164	0.792654	-	-			-0.786809	0.626869	0.43441	-1.3163	-	-			0			0	-	-			NaN	NaN	NaN	NaN				+					-	-			-1.14266	1.38431	0.113795	-2.4953
G5E8K5	Ank3	Ankyrin-3	Ank3	-0.304029	0.537435	0.789389	-1.117	-	-			-0.627291	2.47316	0.0231597	-3.72305	-	+			-0.365967	1.06411	0.622469	-1.90243	-	-			-0.689213	1.29591	0.254808	-2.25495					-0.993259	3.04555	0.102667	-4.85631	-	+			-0.323233	0.642584	0.408111	-1.27751
G5E8L3	Nat8f4	MCG128680, isoform CRA_a	Nat8f4	0.101153	0.124872	0.960491	0.33656	-	-							-	-			0			0	-	-			NaN	NaN	NaN	NaN				+					-	-			NaN	NaN	NaN	NaN
G5E8V9	Arfip1	ADP-ribosylation factor-interacting protein 1	Arfip1	-0.506104	1.05838	0.598586	-1.89443	-	-			-0.0534362	0.0851384	0.908923	-0.230438	-	-			0.219391	0.440688	0.850185	0.946624	-	-			0.67205	1.56166	0.184957	2.54088					0.165955	0.284707	0.826946	0.665974	-	-			0.452678	1.01996	0.216269	1.82339
G5E8Z3	2310050C09Rik	MCG120169	2310050C09Rik					-	-							-	-			0			0	-	-			NaN	NaN	NaN	NaN									-	-			NaN	NaN	NaN	NaN
H3BKP8	9930021J03Rik	RIKEN cDNA 9930021J03 gene	9930021J03Rik	-0.319955	0.576916	0.784868	-1.1889	-	-			-0.139353	0.392486	0.622615	-0.865862	-	-			0.199612	0.558116	0.790807	1.14472	-	-			0.38025	0.679944	0.525235	1.35334					0.0602595	0.10737	0.928098	0.285669	-	-			0.180615	0.349006	0.646806	0.790267
I7HPW8	Myo15b	Myosin XVB	Myo15b	0.627263	1.45863	0.513806	2.44111	-	-			-0.433818	0.657123	0.413204	-1.29985	-	-			0.38251	0.289209	0.90965	0.672842	-	-			-0.678591	0.585239	0.583373	-1.18794					-0.051309	0.0296434	0.979296	-0.0847013	-	-			-1.06112	2.67303	0.0126131	-3.98974		+
J3QN89	Aamp	Angio-associated migratory protein	Aamp	0.331034	0.420201	0.842959	0.936871	-	-			0.179273	0.259496	0.739358	0.620719	-	-			-0.204938	0.345781	0.889015	-0.784298	-	-			-0.3567	0.530854	0.620949	-1.12166					-0.0256645	0.0346879	0.975543	-0.099887	-	-			-0.151731	0.193074	0.793336	-0.48066
K7N6C2	Cyp2c68	Cytochrome P450, family 2, subfamily c, polypeptide 68	Cyp2c68					-	-							-	-			0			0	-	-			NaN	NaN	NaN	NaN									-	-			NaN	NaN	NaN	NaN
O08529	Capn2	Calpain-2 catalytic subunit	Capn2	0.0872644	0.23687	0.929206	0.572538	-	-			0.192368	1.13557	0.189344	1.98067	-	-			-0.227337	0.622085	0.763788	-1.23984	-	-			-0.122228	0.225317	0.847776	-0.547111					-0.0349688	0.06464	0.950299	-0.178327	-	-			0.1051	0.316655	0.674743	0.727137
O08532	Cacna2d1	Voltage-dependent calcium channel subunit alpha-2/delta-1	Cacna2d1	-0.0573626	0.106265	0.96428	-0.282995	-	-			-0.0239582	0.0605993	0.937092	-0.16783	-	-			-0.610273	1.738	0.409784	-2.72957	-	-			-0.57686	1.24698	0.270086	-2.12952					-0.634231	1.81014	0.153918	-2.86121	-	-			0.0334261	0.0569309	0.929516	0.158233
O08539	Bin1	Myc box-dependent-interacting protein 1	Bin1	-0.13388	0.0981527	0.964925	-0.263235	-	-			-0.213226	0.335693	0.671813	-0.762773	-	-			-0.513114	1.35021	0.528603	-2.26566	-	-			-0.59245	0.616339	0.567187	-1.24387					-0.72634	1.22312	0.297301	-2.12197	-	-			-0.0793665	0.0699768	0.917117	-0.192075
O08547	Sec22b	Vesicle-trafficking protein SEC22b	Sec22b	-0.811299	1.98622	0.40525	-3.1506	-	-			0.0569463	0.169311	0.825629	0.427652	-	-			-0.498841	0.628835	0.763908	-1.25021	-	-			0.369395	0.343027	0.767091	0.776348					-0.441895	0.500656	0.685388	-1.05111	-	-			0.868238	2.18453	0.0301538	3.34473	+
O08553	Dpysl2	Dihydropyrimidinase-related protein 2	Dpysl2	0.225986	0.397177	0.856103	0.877698	-	-			-0.0553155	0.101345	0.88824	-0.270383	-	-			-0.181222	0.573881	0.77957	-1.16474	-	-			-0.462524	1.32898	0.243229	-2.23777					-0.236537	0.476971	0.707061	-1.01163	-	-			-0.281309	0.87924	0.277334	-1.62681
O08573	Lgals9	Galectin-9	Lgals9	-0.0398149	0.0474257	0.980017	-0.133366	-	-			0.866213	2.49579	0.0227052	3.75303	+	-			-0.145668	0.338541	0.89059	-0.765744	-	-			0.76035	1.90902	0.128607	2.98851					0.720544	1.64915	0.182425	2.65387	-	-			0.906007	2.90475	0.0092823	4.30514	+
O08579	Emd	Emerin	Emd	0.130031	0.631619	0.760809	1.26792	-	-			0.422652	2.26155	0.031216	3.44503	+	-			-0.216876	0.312095	0.899798	-0.716452	-	-			0.0757479	0.0877852	0.939466	0.237035					0.205776	0.275688	0.835443	0.648375	-	-			0.292661	1.36275	0.118874	2.2821
O08582	Gtpbp1	GTP-binding protein 1	Gtpbp1	0.74993	0.668173	0.740485	1.34762	-	-			-0.0803898	0.10147	0.888181	-0.272153	-	-			0.056447	0.105586	0.974775	0.28325	-	-			-0.773866	0.658295	0.539921	-1.34804					-0.0239428	0.0179786	0.98502	-0.0534438	-	-			-0.830333	1.32909	0.126021	-2.23793
O08585	Clta	Clathrin light chain A	Clta	-0.347436	0.506659	0.808694	-1.06616	-	-			0.242444	0.38606	0.628073	0.854423	-	-			0.0625586	0.0580889	0.990469	0.160958	-	-			0.652429	0.795298	0.453574	1.50607					0.305002	0.303843	0.814463	0.702822	-	-			0.589871	1.21542	0.154925	2.08759
O08586	Pten	Phosphatidylinositol 3,4,5-trisphosphate 3-phosphatase and dual-specificity protein phosphatase PTEN	Pten	-0.332561	0.584043	0.783078	-1.30926	-	-			0.191225	0.485192	0.540034	1.0533	-	-			-0.22699	0.208986	0.933286	-0.51638	-	-			0.2968	0.179652	0.881698	0.460723					-0.0357657	0.018908	0.984815	-0.0556901	-	-			0.523767	1.5763	0.0832315	2.7999
O08599	Stxbp1	Syntaxin-binding protein 1	Stxbp1	-0.122888	0.262658	0.918515	-0.62465	-	-			0.27096	0.703856	0.384386	1.37078	-	-			-0.212344	0.373186	0.877224	-0.831338	-	-			0.1815	0.29463	0.801195	0.687461					0.0586163	0.0912582	0.939007	0.246238	-	-			0.393828	0.974027	0.235172	1.75992
O08600	Endog	Endonuclease G, mitochondrial	Endog	-0.189315	0.371278	0.871975	-0.839947	-	-			-0.635859	2.26425	0.0313348	-3.63514	-	+			-0.536541	0.628203	0.764014	-1.27159	-	-			-0.98305	1.13759	0.311266	-2.06451					-1.1724	1.13676	0.326395	-2.17075	-	-			-0.4465	1.25147	0.144876	-2.13547
O08601	Mttp	Microsomal triglyceride transfer protein large subunit	Mttp					-	-							-	-			0			0	-	-			NaN	NaN	NaN	NaN									-	-			NaN	NaN	NaN	NaN
O08638	Myh11	Myosin-11	Myh11	0.154675	0.321238	0.894735	0.738357	-	-			-0.030715	0.0538817	0.945369	-0.150207	-	-			-0.535296	1.38805	0.508517	-2.29013	-	-			-0.720714	1.87699	0.131892	-2.94726					-0.566011	1.21016	0.301039	-2.08058	-	-			-0.1854	0.540249	0.484646	-1.11593
O08644	Ephb6	Ephrin type-B receptor 6	Ephb6					-	-							-	-			0			0	-	-			NaN	NaN	NaN	NaN			+						-	-			NaN	NaN	NaN	NaN
O08663	Metap2	Methionine aminopeptidase 2	Metap2	-0.600136	1.19296	0.573857	-2.08066	-	-			0.193457	0.520556	0.508157	1.08387	-	-			0.0425282	0.0484299	0.992699	0.13548	-	-			0.836131	1.24356	0.27091	2.12498					0.235985	0.311132	0.813277	0.71669	-	-			0.793602	1.7911	0.0574028	2.8367
O08664	Bcl7c	B-cell CLL/lymphoma 7 protein family member C	Bcl7c	0.0413672	0.06031	0.975235	0.168539	-	-			0.210209	0.696481	0.386971	1.37916	-	-			0.445908	0.867655	0.685436	1.65936	-	-			0.61475	0.874356	0.414411	1.69679					0.656117	0.778783	0.506372	1.61876	-	-			0.16884	0.485766	0.528603	1.02636
O08677	Kng1	Kininogen-1	Kng1	-0.540887	0.525319	0.793636	-1.09708	-	-			0.712432	0.825152	0.317536	1.54935	-	-			-0.314529	0.228334	0.925496	-0.553328	-	-			0.938783	0.805608	0.449473	1.53228					0.397903	0.292795	0.819806	0.683906	-	-			1.2533	1.56466	0.0848889	2.54475
O08688	Capn5	Calpain-5	Capn5	0.760218	0.669953	0.738901	1.36728	-	-			0.0222621	0.018337	0.979175	0.053301	-	-			0.0549939	0.0484751	0.993098	0.137039	-	-			-0.682947	0.572221	0.589336	-1.2213					0.077256	0.0457269	0.965633	0.132091	-	-			-0.737951	1.0351	0.210576	-1.86184
O08692	Ngp	Neutrophilic granule protein	Ngp					-	-							-	-			-0.277781	0.118313	0.973423	-0.310469	-	-			5.68455	2.58691	0.070439	4.30769	+								-	-			5.96234	4.50362	0.000266667	8.37483	+
O08709	Prdx6	Peroxiredoxin-6	Prdx6	-0.50477	0.656241	0.743745	-1.30636	-	-			-1.05227	1.66517	0.076974	-2.67453	-	-			0.105022	0.0852369	0.98131	0.230226	-	-			-0.442502	0.440412	0.689506	-0.949557					-0.947248	1.23446	0.294719	-2.1129	-	-			-0.547517	0.672993	0.387894	-1.32409
O08715	Akap1	A-kinase anchor protein 1, mitochondrial	Akap1	-0.458257	0.411115	0.846376	-0.912761	-	-			-0.502444	0.76068	0.35266	-1.4655	-	-			0.4029	0.52458	0.803576	1.09587	-	-			0.35872	0.287929	0.807983	0.680637					-0.0995434	0.0756411	0.942781	-0.208361	-	-			-0.0441857	0.0400691	0.949996	-0.113519
O08734	Bak1	Bcl-2 homologous antagonist/killer	Bak1	0.967954	1.15542	0.571677	2.09093	-	-			0.812961	2.13142	0.0379415	3.44013	+	-			0.280122	0.37901	0.880183	0.854232	-	-			0.125133	0.0787513	0.945155	0.217318					1.09308	1.58014	0.199462	3.11859	-	-			-0.154991	0.165299	0.819173	-0.418774
O08736	Casp12	Caspase-12	Casp12					-	-							-	-			0			0	-	-			NaN	NaN	NaN	NaN									-	-			NaN	NaN	NaN	NaN
O08739	Ampd3	AMP deaminase 3	Ampd3	0.368394	0.39991	0.854449	0.882566	-	-			0.378114	0.403281	0.612414	0.88496	-	-			-0.399796	0.43336	0.853964	-0.934093	-	-			-0.390067	0.421464	0.701591	-0.916798					-0.0216814	0.0139576	0.985563	-0.0405615	-	-			0.0097188	0.0119596	0.982416	0.0348321
O08746	Matn2	Matrilin-2	Matn2	-0.572053	0.798993	0.690626	-1.55372	-	-			-0.208494	0.206708	0.790159	-0.51154	-	-			-0.2936	0.283267	0.909165	-0.665352	-	-			0.0699537	0.0587361	0.958661	0.163808					-0.502094	0.496293	0.690253	-1.07282	-	-			0.363562	0.459191	0.550737	0.981622
O08749	Dld	Dihydrolipoyl dehydrogenase, mitochondrial	Dld	-0.191184	0.37524	0.869642	-0.83827	-	-			-0.370639	1.47167	0.106952	-2.4242	-	-			-0.428118	0.684577	0.74789	-1.33472	-	-			-0.607579	0.868585	0.416797	-1.61165					-0.798757	1.35697	0.255374	-2.27452	-	-			-0.179464	0.396996	0.605274	-0.87386
O08756	Hsd17b10	3-hydroxyacyl-CoA dehydrogenase type-2	Hsd17b10	0.0358941	0.0269993	0.98686	0.0775384	-	-			-0.184495	0.268944	0.730109	-0.635116	-	-			-0.381633	0.345035	0.88938	-0.777676	-	-			-0.602021	0.455387	0.679893	-0.975158					-0.566128	0.506529	0.683368	-1.06082	-	-			-0.220379	0.211525	0.77394	-0.518419
O08759	Ube3a	Ubiquitin-protein ligase E3A	Ube3a	0.546987	1.124	0.579045	2.01137	-	-			0.348589	1.60305	0.0851924	2.6351	-	-			-0.210918	0.23614	0.927572	-0.567894	-	-			-0.409297	0.420888	0.701259	-0.915795					0.137671	0.114723	0.929229	0.303336	-	-			-0.198383	0.431794	0.574938	-0.934708
O08788	Dctn1	Dynactin subunit 1	Dctn1	-0.393219	1.95687	0.423854	-3.11088	-	-			0.00434535	0.013948	0.981871	0.0405339	-	-			-0.208341	1.16958	0.597543	-2.02635	-	-			0.189233	0.818367	0.441523	1.55109					-0.203996	1.49572	0.222856	-2.49099	-	-			0.397569	1.86455	0.0505023	2.93125
O08795	Prkcsh	Glucosidase 2 subunit beta	Prkcsh	-0.349833	0.741228	0.711574	-1.43629	-	-			0.0289463	0.0616055	0.935835	0.170452	-	-			0.22095	0.605899	0.767048	1.21482	-	-			0.599716	1.48494	0.199716	2.44145					0.249896	0.690335	0.56405	1.3504	-	-			0.378759	0.871657	0.281145	1.61602
O08796	Eef2k	Eukaryotic elongation factor 2 kinase	Eef2k	0.067818	0.133403	0.96185	0.347355	-	-			-0.158341	0.313501	0.689249	-0.721178	-	-			-0.207369	0.318526	0.896196	-0.733225	-	-			-0.433487	0.853061	0.425837	-1.61733					-0.36571	0.593711	0.623228	-1.21617	-	-			-0.226139	0.594452	0.443637	-1.20249
O08797	Serpinb9	SPI6	Serpinb9	0.653414	0.469338	0.821949	1.00893	-	-			0.738111	1.77773	0.0651613	2.8195	-	-			0.212368	0.234193	0.925513	0.569136	-	-			0.29707	0.133802	0.919189	0.352486					0.950478	1.13089	0.326362	2.05459	-	-			0.084706	0.0534467	0.933704	0.149403
O08804	Serpinb6b	NK13	Serpinb6b					-	-			0.477516	0.393161	0.622062	0.896687	-	-			0			0	-	-			NaN	NaN	NaN	NaN									-	-			NaN	NaN	NaN	NaN
O08807	Prdx4	Peroxiredoxin-4	Prdx4	-0.208638	0.355123	0.883348	-0.801547	-	-			0.0818173	0.14084	0.852337	0.363616	-	-			-0.340394	0.556463	0.790491	-1.13715	-	-			-0.0499499	0.0534051	0.962962	-0.148948					-0.258577	0.29271	0.819661	-0.681462	-	-			0.29045	1.22549	0.152506	2.10098
O08808	Diaph1	Protein diaphanous homolog 1	Diaph1	-0.0329237	0.0715291	0.970327	-0.196511	-	-			0.0699905	0.269044	0.730332	0.635314	-	-			-0.757856	1.04152	0.631002	-1.83833	-	-			-0.654945	0.737489	0.489747	-1.42105					-0.687865	0.796031	0.49591	-1.50714	-	-			0.102926	0.36008	0.636715	0.807603
O08810	Eftud2	116 kDa U5 small nuclear ribonucleoprotein component	Eftud2	-0.244652	0.42359	0.842761	-0.92437	-	-			0.158143	0.959738	0.254879	1.74005	-	-			-0.0929555	0.245221	0.923595	-0.586261	-	-			0.30985	0.52523	0.625767	1.09151					0.0651877	0.135891	0.917441	0.352228	-	-			0.402793	0.948151	0.245672	1.72389
O08832	Galnt4	Polypeptide N-acetylgalactosaminyltransferase 4	Galnt4	0.562862	0.573403	0.787565	1.17542	-	-			-0.340722	0.430942	0.591072	-0.933237	-	-			0.610932	0.846709	0.685085	1.59263	-	-			-0.292633	0.23537	0.840922	-0.571565					0.27021	0.513013	0.680394	1.08318	-	-			-0.903576	0.955809	0.24225	-1.73457
O08848	Trove2	60 kDa SS-A/Ro ribonucleoprotein	Trove2					-	-			-0.580155	0.717869	0.376374	-1.44577	-	-			0			0	-	-			NaN	NaN	NaN	NaN									-	-			NaN	NaN	NaN	NaN
O08856	Ell	RNA polymerase II elongation factor ELL	Ell					-	-							-	-			0			0	-	-			NaN	NaN	NaN	NaN									-	-			NaN	NaN	NaN	NaN
O08912	Galnt1	Polypeptide N-acetylgalactosaminyltransferase 1	Galnt1	0.692762	1.00076	0.611402	1.83421	-	-			0.552754	1.35886	0.130576	2.30651	-	-			-0.118693	0.168141	0.95704	-0.426211	-	-			-0.25871	0.266071	0.823506	-0.633912					0.434061	0.718141	0.54581	1.42721	-	-			-0.139993	0.166694	0.817429	-0.421867
O08914	Faah	Fatty-acid amide hydrolase 1	Faah	-0.225023	0.0818744	0.968666	-0.228673	-	-							-	-			0			0	-	-			NaN	NaN	NaN	NaN				+					-	-			NaN	NaN	NaN	NaN
O08915	Aip	AH receptor-interacting protein	Aip	0.0404816	0.0690053	0.970388	0.191256	-	-			0.573192	2.57669	0.0202397	4.1066	+	-			-0.378991	0.710463	0.743633	-1.40087	-	-			0.153717	0.184592	0.875902	0.465848					0.194201	0.230482	0.855635	0.571851	-	-			0.532696	1.88497	0.0487714	2.95753
O08917	Flot1	Flotillin-1	Flot1	-0.309929	0.528498	0.793308	-1.11768	-	-			0.478351	0.885508	0.291142	1.66551	-	-			-0.683909	1.35014	0.526954	-2.29471	-	-			0.104396	0.134291	0.918937	0.350508					-0.205558	0.335116	0.799545	-0.777625	-	-			0.788274	1.70215	0.068401	2.72218
O08919	Numbl	Numb-like protein	Numbl					-	-	+		0.827706	1.42059	0.11699	2.55245	-	-			0			0	-	-	+		NaN	NaN	NaN	NaN									-	-	+		NaN	NaN	NaN	NaN
O08992	Sdcbp	Syntenin-1	Sdcbp					-	-		+					-	-		+	0			0	-	-	+		NaN	NaN	NaN	NaN				+					-	-			-0.13398	0.0880391	0.897545	-0.242447
O08997	Atox1	Copper transport protein ATOX1	Atox1	-0.913824	1.24506	0.565592	-2.15194	-	-			-0.264985	0.647842	0.420226	-1.2856	-	-			0.00614339	0.00971019	0.999777	0.0283516	-	-			0.654967	0.79745	0.452954	1.52022					-0.258841	0.712063	0.547385	-1.39215	-	-			0.648836	0.842053	0.294585	1.57369
O09005	Degs1	Sphingolipid delta(4)-desaturase DES1	Degs1					-	-							-	-			0			0	-	-			NaN	NaN	NaN	NaN									-	-			NaN	NaN	NaN	NaN
O09012	Pex5	Peroxisomal targeting signal 1 receptor	Pex5	-0.508197	0.453586	0.830912	-0.988419	-	-			0.0392855	0.0454322	0.953948	0.128376	-	-			-0.37165	0.420121	0.861799	-0.928965	-	-			0.175834	0.102713	0.932246	0.277541					-0.332364	0.26917	0.836844	-0.660644	-	-			0.547491	0.709859	0.365539	1.3798
O09043	Napsa	Napsin-A	Napsa					-	-							-	-		+	-0.181458	0.148083	0.963656	-0.383869	-	-			NaN	NaN	NaN	NaN			+						-	-		+	NaN	NaN	NaN	NaN
O09044	Snap23	Synaptosomal-associated protein 23	Snap23	0.260144	0.481912	0.821069	1.02465	-	-			0.661018	1.79369	0.0633779	2.84003	-	-			-0.0601153	0.0843952	0.981094	-0.228127	-	-			0.340766	0.585156	0.582565	1.18781					0.600903	1.06401	0.352699	1.8837	-	-			0.400895	1.26367	0.142561	2.15163
O09061	Psmb1	Proteasome subunit beta type-1	Psmb1	-0.417671	0.672852	0.7387	-1.33207	-	-			0.00232687	0.0032534	0.993535	0.00956866	-	-			0.0806103	0.0701485	0.988268	0.192138	-	-			0.500619	0.493744	0.649557	1.03965					0.0829372	0.0670539	0.949211	0.184562	-	-			0.420033	0.728285	0.355844	1.40736
O09106	Hdac1	Histone deacetylase 1	Hdac1	0.514238	1.06725	0.590221	2.13688	-	-			0.414167	1.00967	0.232741	1.87403	-	-			-0.341666	0.442197	0.851415	-0.956761	-	-			-0.441755	0.424969	0.69853	-0.945551					0.0725007	0.0489124	0.96513	0.139677	-	-			-0.100104	0.1738	0.810728	-0.440173
O09110	Map2k3	Dual specificity mitogen-activated protein kinase kinase 3	Map2k3	-0.758821	0.914842	0.638508	-1.69126	-	-			-0.356188	1.5686	0.0915517	-2.54985	-	-			-0.267165	0.816183	0.702497	-1.52695	-	-			0.135481	0.119379	0.922261	0.313639					-0.623353	2.29453	0.0993115	-3.48812	-	+			0.402639	0.449301	0.560427	0.964783
O09111	Ndufb11	NADH dehydrogenase [ubiquinone] 1 beta subcomplex subunit 11, mitochondrial	Ndufb11	0.235458	0.124891	0.96095	0.331346	-	-			-0.716804	0.599144	0.452118	-1.29565	-	-			0			0	-	-			NaN	NaN	NaN	NaN				+					-	-			-0.95226	0.522586	0.496608	-1.13363
O09116	Sprr3	Small proline-rich protein 3	Sprr3					-	-							-	-			2.37179	1.79967	0.420383	3.32724	-	-			NaN	NaN	NaN	NaN			+						-	-			NaN	NaN	NaN	NaN
O09117	Sypl1	Synaptophysin-like protein 1	Sypl1	-0.343715	0.733376	0.711136	-1.43624	-	-			-0.767626	1.84897	0.0581919	-2.96531	-	-			0.254874	0.373799	0.877507	0.835658	-	-			-0.169017	0.234208	0.841673	-0.569167					-0.512752	0.817091	0.483481	-1.58171	-	-			-0.423917	0.988002	0.229781	-1.7793
O09131	Gsto1	Glutathione S-transferase omega-1	Gsto1	-0.209412	0.563951	0.790153	-1.16017	-	-			-0.771345	1.65663	0.0782703	-2.66351	-	-			0.245349	0.294386	0.908493	0.68279	-	-			-0.316571	0.482272	0.659298	-1.02052					-0.525996	1.02952	0.370279	-1.83652	-	-			-0.561928	0.998907	0.225576	-1.79438
O09159	Man2b1	Lysosomal alpha-mannosidase	Man2b1	0.153955	0.17551	0.951285	0.442479	-	-			-0.0223148	0.0286537	0.968295	-0.0819588	-	-			0.192397	0.321191	0.896657	0.73827	-	-			0.0161399	0.0158983	0.985856	0.0463353					0.170082	0.178772	0.891433	0.451137	-	-			-0.176257	0.3134	0.678347	-0.720986
O09161	Casq2	Calsequestrin-2	Casq2	0.108418	0.0626847	0.973923	0.174778	-	-			-0.698996	0.616692	0.440931	-1.24443	-	-			-1.28182	1.88725	0.404	-3.08834	-	-			-2.08922	2.93767	0.0606364	-5.27499		+			-1.98082	1.69606	0.169593	-2.99322	-	-			-0.807383	1.12285	0.181985	-1.98406
O09164	Sod3	Extracellular superoxide dismutase [Cu-Zn]	Sod3	-0.448208	0.526139	0.79423	-1.11368	-	-			0.304695	0.470298	0.555451	1.01058	-	-			-0.256567	0.20049	0.939937	-0.49654	-	-			0.496317	0.367579	0.746509	0.828215					0.0481274	0.0262806	0.98321	0.0763445	-	-			0.752888	1.1999	0.158964	2.06689
O09165	Casq1	Calsequestrin-1	Casq1	-0.0807689	0.0268218	0.986131	-0.0778721	-	-			-0.498261	0.137724	0.854736	-0.361707	-	-			0			0	-	-			NaN	NaN	NaN	NaN				+					-	-			-0.417521	0.138189	0.847462	-0.360977
O09167	Rpl21	60S ribosomal protein L21	Rpl21	0.761875	1.25149	0.570636	2.19228	-	-			0.552992	0.946642	0.259938	1.73677	-	-			0.0920001	0.12575	0.969552	0.327949	-	-			-0.116878	0.149257	0.908799	-0.382806					0.644993	1.09341	0.34222	1.94324	-	-			-0.208893	0.308812	0.682997	-0.712285
O09172	Gclm	Glutamate--cysteine ligase regulatory subunit	Gclm	-0.348003	0.518408	0.798226	-1.08567	-	-			0.0989018	0.184756	0.812617	0.461405	-	-			0.0881712	0.125137	0.969233	0.327202	-	-			0.535083	0.756955	0.477855	1.45992					0.187073	0.363399	0.776179	0.816722	-	-			0.446919	0.668727	0.391031	1.31759
O09174	Amacr	Alpha-methylacyl-CoA racemase	Amacr	0.50246	0.697255	0.727742	1.41212	-	-			-0.021994	0.0200647	0.977331	-0.0582139	-	-			0			0	-	-			NaN	NaN	NaN	NaN				+					-	-			-0.52446	0.683281	0.382086	-1.34814
O35071	Kif1c	Kinesin-like protein KIF1C	Kif1c	-0.0860989	0.0977303	0.965111	-0.26395	-	-			-0.187862	0.289443	0.71052	-0.677398	-	-			-0.385022	0.632284	0.761657	-1.28968	-	-			-0.486787	0.669109	0.531121	-1.38885					-0.572884	0.63216	0.596381	-1.32543	-	-			-0.101792	0.176823	0.807651	-0.445363
O35074	Ptgis	Prostacyclin synthase	Ptgis	-0.0448434	0.0885618	0.967767	-0.239538	-	-			0.239168	0.636987	0.427959	1.26887	-	-			-0.45331	1.16604	0.596271	-2.00356	-	-			-0.169283	0.315413	0.785615	-0.724791					-0.214143	0.371942	0.772628	-0.829095	-	-			0.284046	1.04516	0.206815	1.85795
O35075	Dscr3	Down syndrome critical region protein 3 homolog	Dscr3	-0.641568	0.56643	0.790638	-1.19397	-	-			-0.048769	0.0660318	0.930504	-0.18437	-	-			-0.591901	0.867417	0.68418	-1.68579	-	-			0.000916799	0.00052453	0.995154	0.00156763					-0.64067	0.657726	0.579885	-1.45283	-	-			0.592816	0.793055	0.320012	1.51371
O35083	Agpat1	1-acyl-sn-glycerol-3-phosphate acyltransferase alpha	Agpat1	-0.188456	0.243801	0.929837	-0.591643	-	-			0.0154719	0.015907	0.980811	0.0463603	-	-			-0.827239	0.942479	0.659259	-1.77301	-	-			-0.623334	0.650215	0.54521	-1.33466					-0.811768	0.942465	0.41648	-1.91151	-	-			0.203929	0.252981	0.732979	0.603377
O35114	Scarb2	Lysosome membrane protein 2	Scarb2	0.692869	0.62156	0.767716	1.27223	-	-			1.07665	2.54361	0.0215976	4.05574	+	-			-0.704729	0.798145	0.706489	-1.51022	-	-			-0.320967	0.207467	0.86223	-0.511356					0.371921	0.237722	0.850812	0.579088	-	-			0.383767	0.45488	0.555868	0.974294
O35127	Grcc10	Protein C10	Grcc10					-	-							-	-			0			0	-	-			NaN	NaN	NaN	NaN									-	-			NaN	NaN	NaN	NaN
O35129	Phb2	Prohibitin-2	Phb2	-0.159995	0.40084	0.853319	-0.884221	-	-			-0.239175	0.888485	0.289436	-1.63993	-	-			0.249978	0.546817	0.796257	1.12176	-	-			0.170769	0.286537	0.809464	0.669527					0.0108032	0.0180052	0.985191	0.0520922	-	-			-0.0791739	0.148199	0.836472	-0.380405
O35134	Polr1a	DNA-directed RNA polymerase I subunit RPA1	Polr1a					-	-							-	-			-0.187177	0.313789	0.898208	-0.736231	-	-			NaN	NaN	NaN	NaN			+						-	-			NaN	NaN	NaN	NaN
O35136	Ncam2	Neural cell adhesion molecule 2	Ncam2	1.08245	0.524835	0.793658	1.19341	-	-			0.0381546	0.119048	0.868259	0.322333	-	-			0			0	-	-			NaN	NaN	NaN	NaN				+					-	-			-1.04429	0.635789	0.412039	-1.3621
O35143	ATP5IF1	ATPase inhibitor, mitochondrial	ATP5IF1	0.325774	0.108585	0.963929	0.288601	-	-			-1.55582	0.839661	0.311608	-1.57025	-	-			1.13733	0.576206	0.778284	1.1684	-	-			-0.744292	0.289672	0.806212	-0.675597					-0.418499	0.167638	0.89701	-0.423957	-	-			-1.88162	0.933119	0.251908	-1.70285
O35144	Terf2	Telomeric repeat-binding factor 2	Terf2					-	-							-	-			0			0	-	-			NaN	NaN	NaN	NaN									-	-			NaN	NaN	NaN	NaN
O35153	Bet1l	BET1-like protein	Bet1l	0.933399	0.547333	0.790406	1.16133	-	-			-0.0577596	0.045664	0.954016	-0.130039	-	-			0.793032	0.865465	0.6853	1.6827	-	-			-0.198167	0.0884415	0.93989	-0.241952					0.735272	1.04804	0.361468	2.23082	-	-			-0.991167	0.852282	0.290171	-1.60076
O35166	Gosr2	Golgi SNAP receptor complex member 2	Gosr2					-	-							-	-			0			0	-	-			NaN	NaN	NaN	NaN									-	-			NaN	NaN	NaN	NaN
O35206	Col15a1	Collagen alpha-1(XV) chain	Col15a1	0.0413328	0.0729077	0.97071	0.200617	-	-			0.1634	0.2877	0.711753	0.674005	-	-			-0.478331	0.812201	0.69987	-1.52126	-	-			-0.35624	0.554175	0.604515	-1.1384					-0.314931	0.403254	0.754915	-0.88851	-	-			0.122088	0.245534	0.739098	0.588392
O35215	Ddt	D-dopachrome decarboxylase	Ddt	0.033316	0.054413	0.97829	0.15196	-	-			-0.149088	0.241859	0.754477	-0.580954	-	-			-0.593561	0.909048	0.670124	-1.65757	-	-			-0.775957	1.28796	0.255849	-2.18374					-0.742649	1.17894	0.314384	-2.03889	-	-			-0.182428	0.327878	0.66625	-0.748214
O35216	Cenpa	Histone H3-like centromeric protein A	Cenpa					-	-			-0.657428	0.36336	0.647332	-0.839898	-	-			0.122414	0.101746	0.975252	0.27691	-	-			NaN	NaN	NaN	NaN			+		-0.535014	0.190782	0.884475	-0.498198	-	-			NaN	NaN	NaN	NaN
O35218	Cpsf2	Cleavage and polyadenylation specificity factor subunit 2	Cpsf2	-0.431971	0.708256	0.716751	-1.41156	-	-			0.281547	0.696653	0.386937	1.36864	-	-			-0.0758419	0.136654	0.966128	-0.354895	-	-			0.63772	1.11538	0.317963	2.03158					0.205705	0.495452	0.690773	1.06126	-	-			0.713517	1.47271	0.0977035	2.46005
O35226	Psmd4	26S proteasome non-ATPase regulatory subunit 4	Psmd4	-0.213536	0.413924	0.845477	-0.907388	-	-			0.139467	0.278734	0.721098	0.654336	-	-			-0.273024	0.420875	0.861527	-0.912596	-	-			0.0799997	0.090779	0.938189	0.244461					-0.133557	0.149703	0.908717	-0.383816	-	-			0.353014	1.1431	0.175983	1.9908
O35239	Ptpn9	Tyrosine-protein phosphatase non-receptor type 9	Ptpn9					-	-		+					-	-		+	0			0	-	-	+		NaN	NaN	NaN	NaN				+					-	-			0.33498	0.324362	0.66959	0.76397
O35245	Pkd2	Polycystin-2	Pkd2					-	-							-	-			-1.18368	0.67675	0.751245	-1.43596	-	-			NaN	NaN	NaN	NaN			+						-	-			NaN	NaN	NaN	NaN
O35250	Exoc7	Exocyst complex component 7	Exoc7	-0.188145	0.165983	0.952206	-0.42453	-	-			0.274117	0.318897	0.684846	0.737079	-	-			-0.235798	0.249111	0.922115	-0.599706	-	-			0.226474	0.194502	0.869321	0.487479					0.0383196	0.0352027	0.975144	0.10192	-	-			0.462271	0.569444	0.461655	1.16285
O35286	Dhx15	Pre-mRNA-splicing factor ATP-dependent RNA helicase DHX15	Dhx15	0.0694736	0.151722	0.956561	0.3894	-	-			0.252667	1.73794	0.0696227	2.76826	-	-			-0.166671	0.733074	0.738051	-1.41449	-	-			0.016516	0.0294185	0.980259	0.0842702					0.0859966	0.25337	0.842615	0.606038	-	-			0.183214	0.585675	0.449546	1.18863
O35295	Purb	Transcriptional activator protein Pur-beta	Purb	-0.330093	0.483378	0.821178	-1.02712	-	-			-0.0267349	0.0589451	0.938713	-0.163511	-	-			-0.304771	0.847457	0.686707	-1.57135	-	-			-0.00140712	0.00147407	0.994036	-0.00434426					-0.331506	0.872047	0.456436	-1.61658	-	-			0.30335	0.478048	0.536443	1.01344
O35326	Srsf5	Serine/arginine-rich splicing factor 5	Srsf5	1.03865	1.11056	0.582774	1.96704	-	-			0.981089	1.31885	0.13973	2.22445	-	-			-2.07e-05	2.24e-05	0.998545	-6.61e-05	-	-			-0.0575696	0.0520571	0.96279	-0.145381					0.981068	1.21171	0.301	2.08264	-	-			-0.0575694	0.0576131	0.928706	-0.160023
O35343	Kpna4	Importin subunit alpha-3	Kpna4					-	-			0.993326	1.86292	0.0568744	3.14453	-	-			-0.52558	0.736941	0.735546	-1.44172	-	-			NaN	NaN	NaN	NaN			+		0.467746	0.466293	0.711296	1.05011	-	-			NaN	NaN	NaN	NaN
O35345	Kpna6	Importin subunit alpha-7	Kpna6	0.719746	0.559253	0.792602	1.22279	-	-			-0.0229998	0.012934	0.982485	-0.0381185	-	-			0			0	-	-			NaN	NaN	NaN	NaN				+					-	-			-0.742783	0.790725	0.321274	-1.54089
O35350	Capn1	Calpain-1 catalytic subunit	Capn1	0.0416803	0.128214	0.961966	0.335248	-	-			0.150675	1.37391	0.126868	2.29671	-	-			-0.0149956	0.0512067	0.992051	-0.142852	-	-			0.0940143	0.270012	0.820882	0.637222					0.13568	0.559366	0.645077	1.14673	-	-			0.109	0.465322	0.546641	0.992008
O35375	Nrp2	Neuropilin-2	Nrp2	0.394062	1.53073	0.524398	2.53803	-	-			0.18097	0.333862	0.673979	0.759369	-	-			0.208941	0.214234	0.9305	0.527483	-	-			-0.00417487	0.00407109	0.992766	-0.0120643					0.389912	0.531241	0.669055	1.12232	-	-			-0.213071	0.410771	0.594312	-0.898123
O35379	Abcc1	Multidrug resistance-associated protein 1	Abcc1	-0.156994	0.185358	0.948463	-0.470077	-	-			0.117126	0.118919	0.868348	0.314285	-	-			-0.133629	0.14932	0.963629	-0.386707	-	-			0.14048	0.258113	0.82791	0.62997					-0.0165033	0.0138762	0.985511	-0.0414337	-	-			0.274109	0.44367	0.565209	0.959308
O35381	Anp32a	Acidic leucine-rich nuclear phosphoprotein 32 family member A	Anp32a	-0.331322	1.36211	0.530524	-2.31091	-	-			-0.163479	0.508161	0.519295	-1.06351	-	-			0.224074	0.555227	0.790785	1.13518	-	-			0.391905	1.12407	0.31818	1.96515					0.0605951	0.114275	0.929168	0.301517	-	-			0.167847	0.534421	0.488605	1.10648
O35382	Exoc4	Exocyst complex component 4	Exoc4	0.389385	0.598041	0.776717	1.21486	-	-			0.586786	1.1963	0.170867	2.06209	-	-			-0.558422	1.2192	0.590722	-2.073	-	-			-0.361015	0.588701	0.583317	-1.19342					0.028364	0.0274186	0.982844	0.0785286	-	-			0.1974	0.448247	0.561574	0.962982
O35386	Phyh	Phytanoyl-CoA dioxygenase, peroxisomal	Phyh					-	-	+		-0.366344	0.605381	0.448316	-1.25986	-	-			-0.324006	0.31604	0.89659	-0.735541	-	-			NaN	NaN	NaN	NaN			+		-0.690351	0.568314	0.639362	-1.23939	-	-			NaN	NaN	NaN	NaN
O35387	Hax1	HCLS1-associated protein X-1	Hax1					-	-							-	-			0			0	-	-			NaN	NaN	NaN	NaN									-	-			NaN	NaN	NaN	NaN
O35400	Sult2b1	Sulfotransferase family cytosolic 2B member 1	Sult2b1	-0.0978238	0.0805769	0.969557	-0.220959	-	-			-0.565134	0.861558	0.30205	-1.6765	-	-			-0.179806	0.132056	0.967712	-0.350684	-	-			-0.64715	0.504965	0.642023	-1.08799					-0.744939	0.598839	0.620392	-1.29509	-	-			-0.467311	0.568183	0.461763	-1.17464
O35405	Pld3	Phospholipase D3	Pld3	-0.534143	0.793847	0.689444	-1.52845	-	-			0.46611	0.958324	0.255034	1.75341	-	-			-0.0719513	0.0618542	0.990405	-0.171987	-	-			0.928275	0.979584	0.367144	1.8289					0.394159	0.303697	0.814118	0.716406	-	-			1.00026	2.63096	0.0136923	3.93323	+
O35425	Bok	Bcl-2-related ovarian killer protein	Bok	-0.426044	0.836454	0.679713	-1.803	-	-			0.198942	0.276025	0.723612	0.666899	-	-			-1.01716	0.687824	0.747117	-1.42079	-	-			-0.392134	0.1596	0.900318	-0.425348					-0.818214	0.373345	0.775266	-0.890945	-	-			0.625006	1.06728	0.200943	2.05498
O35435	Dhodh	Dihydroorotate dehydrogenase (quinone), mitochondrial	Dhodh	0.0899475	0.0710187	0.969883	0.196467	-	-			-0.233723	0.50881	0.519435	-1.06974	-	-			0.0801997	0.15913	0.958923	0.406107	-	-			-0.24346	0.223161	0.850511	-0.548696					-0.153524	0.21752	0.861798	-0.536797	-	-			-0.323669	0.415124	0.589466	-0.909502
O35452	Tnxb	Tenascin X	Tnxb	-0.491271	1.43526	0.513247	-2.40963	-	-			-1.02008	3.6092	0.00589474	-5.31698	-	+			-0.0218253	0.0363972	0.991812	-0.103269	-	-			-0.550616	1.45864	0.207	-2.44111					-1.0419	3.48802	0.104	-5.34682	-	+			-0.528786	1.46935	0.0983056	-2.42119
O35459	Ech1	Delta(3,5)-Delta(2,4)-dienoyl-CoA isomerase, mitochondrial	Ech1	0.383615	0.877234	0.651742	1.63702	-	-			0.0582301	0.123801	0.865031	0.324064	-	-			-0.699272	0.906576	0.670146	-1.65413	-	-			-1.02467	1.26914	0.263105	-2.15887					-0.641042	0.66799	0.576806	-1.31647	-	-			-0.325412	1.35787	0.119921	-2.27571
O35465	Fkbp8	Peptidyl-prolyl cis-trans isomerase FKBP8	Fkbp8	0.258841	0.33641	0.890013	0.770265	-	-			0.60709	1.29148	0.145279	2.21516	-	-			-0.186874	0.317102	0.896516	-0.727981	-	-			0.1614	0.210176	0.859576	0.517077					0.420216	1.27134	0.285287	2.2203	-	-			0.348258	0.475344	0.538277	1.0089
O35492	Clk3	Dual specificity protein kinase CLK3	Clk3					-	-	+		0.0175902	0.00882627	0.98669	0.0268282	-	-			0			0	-	-	+		NaN	NaN	NaN	NaN									-	-	+		NaN	NaN	NaN	NaN
O35551	Rabep1	Rab GTPase-binding effector protein 1	Rabep1					-	-			0.639142	0.958879	0.254995	1.87489	-	-			-0.571531	0.680823	0.74835	-1.40886	-	-			NaN	NaN	NaN	NaN			+		0.0676104	0.0415814	0.967971	0.122117	-	-			NaN	NaN	NaN	NaN
O35593	Psmd14	26S proteasome non-ATPase regulatory subunit 14	Psmd14	-0.227297	0.209107	0.938867	-0.516636	-	-			0.568133	0.849947	0.306935	1.59735	-	-			-0.337367	0.739893	0.733434	-1.42462	-	-			0.458066	0.74077	0.487415	1.4356					0.230767	0.24195	0.848543	0.58509	-	-			0.795412	1.74104	0.0631379	2.77226
O35598	Adam10	Disintegrin and metalloproteinase domain-containing protein 10	Adam10	-0.661754	1.49381	0.515342	-2.53301	-	-			0.0112181	0.0662208	0.930238	0.18284	-	-			-0.0229417	0.0794471	0.984339	-0.216155	-	-			0.650034	1.53168	0.190288	2.5393					-0.0117236	0.0327417	0.975288	-0.0937245	-	-			0.672974	1.98355	0.0418991	3.08458
O35601	Fyb1	FYN-binding protein 1	Fyb1					-	-			0.829613	1.335	0.136371	2.35611	-	-			-0.173052	0.204756	0.935556	-0.507383	-	-			NaN	NaN	NaN	NaN			+		0.656561	0.458649	0.715697	1.03569	-	-			NaN	NaN	NaN	NaN
O35604	Npc1	NPC intracellular cholesterol transporter 1	Npc1					-	-			1.31427	1.17332	0.177166	2.23187	-	-			-0.563862	0.386198	0.877412	-0.883506	-	-			NaN	NaN	NaN	NaN			+		0.750408	0.751046	0.523864	1.63495	-	-			NaN	NaN	NaN	NaN
O35609	Scamp3	Secretory carrier-associated membrane protein 3	Scamp3	-0.646814	0.481563	0.820487	-1.05999	-	-			0.688868	1.03269	0.225827	1.88038	-	-			-0.876649	0.688709	0.746635	-1.36704	-	-			0.459026	0.189862	0.871649	0.483528					-0.187781	0.0804707	0.94142	-0.223095	-	-			1.33567	1.65134	0.0733691	2.75432
O35623	Bet1	BET1 homolog	Bet1					-	-							-	-			0			0	-	-			NaN	NaN	NaN	NaN									-	-			NaN	NaN	NaN	NaN
O35638	Stag2	Cohesin subunit SA-2	Stag2	-0.0192698	0.023853	0.988763	-0.0694713	-	-			0.0934022	0.147972	0.845957	0.382092	-	-			-0.323091	0.324785	0.894999	-0.745054	-	-			-0.210441	0.158794	0.901241	-0.408312					-0.229689	0.167399	0.896941	-0.429969	-	-			0.112634	0.159171	0.82604	0.406199
O35639	Anxa3	Annexin A3	Anxa3	-0.535944	0.613952	0.77133	-1.2401	-	-			-0.27803	1.4945	0.103187	-2.45386	-	-			0.140892	0.530291	0.8005	1.0952	-	-			0.398797	0.460352	0.674995	0.983592					-0.137138	0.439822	0.725764	-0.948543	-	-			0.257898	0.277681	0.708996	0.652278
O35640	Anxa8	Annexin A8	Anxa8	-0.82107	1.16419	0.573002	-2.10392	-	-			1.49597	4.06031	0.00407843	6.71505	+	-			-0.751686	1.69395	0.414987	-2.67475	-	-			1.56537	2.77708	0.0623051	4.13047	+				0.744282	1.22838	0.296006	2.15961	-	-			2.31703	4.84568	0.000266667	7.36191	+
O35643	Ap1b1	AP-1 complex subunit beta-1	Ap1b1	-0.0717669	0.187812	0.946267	-0.469308	-	-			-0.0490469	0.137991	0.854765	-0.357071	-	-			-0.0706128	0.151444	0.963063	-0.386911	-	-			-0.0478669	0.0884248	0.939674	-0.238624					-0.11966	0.204075	0.873401	-0.502733	-	-			0.0227331	0.183714	0.801344	0.459148
O35654	Pold2	DNA polymerase delta subunit 2	Pold2	0.398889	0.224022	0.934581	0.56417	-	-			-0.184961	0.125548	0.864286	-0.332912	-	-			0.397029	0.31922	0.896182	0.746836	-	-			-0.18685	0.100521	0.932789	-0.276299					0.212069	0.202987	0.873938	0.526109	-	-			-0.58385	0.431351	0.575369	-0.949046
O35660	Gstm6	Glutathione S-transferase Mu 6	Gstm6					-	-							-	-			0			0	-	-			NaN	NaN	NaN	NaN									-	-			NaN	NaN	NaN	NaN
O35680	Mrps12	28S ribosomal protein S12, mitochondrial	Mrps12	1.30071	0.72525	0.714473	1.523	-	-			0.602508	0.333191	0.674067	0.791904	-	-			0			0	-	-			NaN	NaN	NaN	NaN				+					-	-			-0.698175	0.667521	0.391674	-1.38614
O35682	Myadm	Myeloid-associated differentiation marker	Myadm	0.0688203	0.17279	0.95254	0.436492	-	-			-0.286881	0.522023	0.507513	-1.08627	-	-			-0.858312	0.547054	0.796311	-1.12213	-	-			-1.21403	0.801015	0.451532	-1.51439					-1.14519	0.735114	0.535896	-1.41752	-	-			-0.355705	0.760614	0.337772	-1.45526
O35685	Nudc	Nuclear migration protein nudC	Nudc	-0.601443	0.922209	0.640354	-1.70183	-	-			0.226022	0.605213	0.448149	1.21941	-	-			-0.0266324	0.0396666	0.990367	-0.112168	-	-			0.800833	1.17865	0.291608	2.06101					0.199389	0.357279	0.780299	0.805509	-	-			0.827471	1.52541	0.0905451	2.49395
O35691	Pnn	Pinin	Pnn	0.726838	0.724002	0.715639	1.4218	-	-			0.630654	0.809172	0.326219	1.53754	-	-			0.0862244	0.2872	0.90834	0.673031	-	-			-0.0099603	0.0119617	0.986529	-0.0350138					0.716879	0.72756	0.540029	1.44208	-	-			-0.0961859	0.161593	0.823617	-0.410533
O35704	Sptlc1	Serine palmitoyltransferase 1	Sptlc1	0.551015	1.16572	0.577105	2.07078	-	-			0.368814	0.689821	0.390757	1.35818	-	-			0.176293	0.342459	0.889402	0.778134	-	-			-0.00592982	0.00961346	0.98793	-0.0282137					0.545107	1.13896	0.3262	2.06655	-	-			-0.182236	0.355977	0.639499	-0.800121
O35730	Ring1	E3 ubiquitin-protein ligase RING1	Ring1	0.0220696	0.0333868	0.983004	0.0976489	-	-			-0.816387	2.38025	0.0265722	-4.17439	-	+			0			0	-	-			NaN	NaN	NaN	NaN				+					-	-			-0.838467	2.32422	0.0235271	-3.87019		+
O35737	Hnrnph1	Heterogeneous nuclear ribonucleoprotein H	Hnrnph1	0.0222715	0.0465881	0.979773	0.131121	-	-			0.1689	0.77352	0.345004	1.47423	-	-			0.143491	0.398232	0.87393	0.873123	-	-			0.290097	0.721061	0.499194	1.39658					0.312391	1.08141	0.344193	1.90738	-	-			0.146626	0.386067	0.61342	0.854435
O35841	Api5	Apoptosis inhibitor 5	Api5	-0.11558	0.206818	0.940319	-0.509984	-	-			-0.0418875	0.16635	0.829147	-0.421104	-	-			0.0483695	0.137524	0.966801	0.355237	-	-			0.122045	0.211634	0.858075	0.518647					0.00648208	0.0133617	0.985294	0.0388552	-	-			0.0737026	0.148422	0.836204	0.380911
O35855	Bcat2	Branched-chain-amino-acid aminotransferase, mitochondrial	Bcat2	-0.590395	1.04291	0.597646	-1.92374	-	-			-0.533914	1.39773	0.122129	-2.39814	-	-			-0.194634	0.220116	0.927238	-0.536344	-	-			-0.138151	0.124724	0.91992	-0.327053					-0.728548	0.772735	0.510315	-1.51291	-	-			0.056483	0.0873593	0.898596	0.235975
O35857	Timm44	Mitochondrial import inner membrane translocase subunit TIM44	Timm44	-0.547451	0.577382	0.784344	-1.18182	-	-			0.073659	0.20221	0.79413	0.498785	-	-			-0.306487	0.786683	0.712842	-1.4935	-	-			0.3146	0.272411	0.817979	0.644012					-0.232828	0.429726	0.731991	-0.935095	-	-			0.621102	0.792749	0.319928	1.50235
O35864	Cops5	COP9 signalosome complex subunit 5	Cops5	-0.207662	0.348443	0.885045	-0.792801	-	-			0.0231593	0.0401396	0.957433	0.11345	-	-			0.21061	0.716128	0.743029	1.3892	-	-			0.441426	1.23251	0.27593	2.16546					0.233769	0.611977	0.609349	1.23698	-	-			0.230831	0.492611	0.522026	1.04267
O35887	Calu	Calumenin	Calu	-0.152755	0.187765	0.945823	-0.469206	-	-			-0.388932	0.587127	0.458412	-1.19093	-	-			0.795586	1.786	0.421109	2.78922	-	-			0.559388	1.14296	0.308196	1.99062					0.406653	0.497869	0.688401	1.0465	-	-			-0.236183	0.637265	0.411116	-1.26929
O35900	Lsm2	U6 snRNA-associated Sm-like protein LSm2	Lsm2	-0.286842	0.183648	0.949446	-0.466295	-	-			0.380265	0.42092	0.597348	0.930399	-	-			0			0	-	-			NaN	NaN	NaN	NaN				+					-	-			0.66713	0.848702	0.291485	1.61083
O35902	Dsg3	Desmoglein-3	Dsg3					-	-							-	-			0			0	-	-			NaN	NaN	NaN	NaN									-	-			NaN	NaN	NaN	NaN
O35943	Fxn	Frataxin, mitochondrial	Fxn	-0.294317	0.28078	0.910195	-0.67661	-	-			-0.81007	1.72635	0.0712574	-2.93762	-	-			0			0	-	-			NaN	NaN	NaN	NaN				+					-	-			-0.515749	0.56729	0.4619	-1.18282
O35945	Aldh1a7	Aldehyde dehydrogenase, cytosolic 1	Aldh1a7	0.037191	0.0337204	0.982905	0.0967646	-	-			-0.720401	0.83614	0.313022	-1.61105	-	-			-0.627023	0.610927	0.767511	-1.28873	-	-			-1.38463	1.97059	0.11887	-3.65045					-1.34742	1.22174	0.297693	-2.31309	-	-			-0.7576	1.44955	0.10163	-2.52523
O35963	Rab33b	Ras-related protein Rab-33B	Rab33b	-0.405324	0.234651	0.927852	-0.597143	-	-			1.45378	0.362115	0.648331	0.837503	-	-			0			0	-	-			NaN	NaN	NaN	NaN				+					-	-			1.85911	0.481009	0.532938	1.05899
O35969	Gamt	Guanidinoacetate N-methyltransferase	Gamt	0.165928	0.14535	0.959575	0.382084	-	-			0.846293	0.792517	0.334317	1.64329	-	-			0			0	-	-			NaN	NaN	NaN	NaN				+					-	-			0.680355	0.879278	0.277457	1.70459
O35972	Mrpl23	39S ribosomal protein L23, mitochondrial	Mrpl23	-0.548454	0.594678	0.778221	-1.26051	-	-			-0.410691	0.277638	0.722045	-0.660205	-	-			0			0	-	-	+		NaN	NaN	NaN	NaN				+					-	-	+		0.13778	0.0950384	0.891088	0.25558
O35988	Sdc4	Syndecan-4	Sdc4	-0.566812	0.490204	0.816511	-1.05222	-	-			-1.25662	1.1452	0.18608	-2.04159	-	-			0.689939	0.591998	0.772802	1.2134	-	-			0.000139618	9.95378e-05	0.994936	0.000296313					-0.566684	0.448061	0.72207	-0.978684	-	-			-0.689817	0.638885	0.410286	-1.2886
O54692	Zw10	Centromere/kinetochore protein zw10 homolog	Zw10	0.690786	0.797943	0.689257	1.60671	-	-			0.471023	0.790239	0.335525	1.56272	-	-			0			0	-	-			NaN	NaN	NaN	NaN				+					-	-			-0.21976	0.221712	0.764462	-0.54882
O54724	Cavin1	Caveolae-associated protein 1	Cavin1	0.246189	0.430181	0.840819	0.935889	-	-			-0.105319	0.162288	0.832503	-0.412082	-	-			-0.390116	1.12722	0.607576	-1.95247	-	-			-0.741638	2.45234	0.0768846	-3.69552		+			-0.495435	1.05367	0.359513	-1.86959	-	-			-0.351538	1.05335	0.205229	-1.86915
O54734	Ddost	Dolichyl-diphosphooligosaccharide--protein glycosyltransferase 48 kDa subunit	Ddost	0.659924	1.72228	0.467559	2.79505	-	-			0.675433	2.56813	0.0205	3.84921	+	-			-0.27908	0.590422	0.773296	-1.19071	-	-			-0.263576	0.426204	0.697399	-0.925033					0.396353	0.68556	0.566581	1.34317	-	-			0.0155239	0.0346067	0.956018	0.0983711
O54774	Ap3d1	AP-3 complex subunit delta-1	Ap3d1	0.395837	0.653739	0.744821	1.31213	-	-			0.0283394	0.0459747	0.953715	0.129474	-	-			-0.00157165	0.00214878	0.99975	-0.00634214	-	-			-0.36906	0.539881	0.614331	-1.12802					0.0267677	0.0342932	0.97499	0.0983499	-	-			-0.367486	0.705773	0.368065	-1.37367
O54782	Man2b2	Epididymis-specific alpha-mannosidase	Man2b2	-0.071078	0.0898874	0.967004	-0.245595	-	-			-0.38151	0.820499	0.319604	-1.58696	-	-			0.29091	0.337778	0.890689	0.782745	-	-			-0.0195134	0.0151744	0.986089	-0.0448752					-0.0906005	0.0898726	0.937882	-0.249269	-	-			-0.31043	0.499392	0.51565	-1.06021
O54784	Dapk3	Death-associated protein kinase 3	Dapk3	0.277533	0.317474	0.894581	0.734361	-	-			0.202393	0.364323	0.646843	0.818411	-	-			-0.47589	0.651601	0.758408	-1.29914	-	-			-0.551003	0.553136	0.604546	-1.14993					-0.273497	0.265222	0.837866	-0.635301	-	-			-0.0751408	0.0859545	0.899255	-0.232475
O54785	Limk2	LIM domain kinase 2	Limk2	-0.18293	0.265828	0.917871	-0.633425	-	-			-0.105055	0.191786	0.804897	-0.477887	-	-			0.139332	0.279308	0.911846	0.660225	-	-			0.217217	0.317922	0.783207	0.739171					0.0342771	0.0473522	0.965561	0.13462	-	-			0.0778953	0.123609	0.865186	0.323613
O54786	Dffa	DNA fragmentation factor subunit alpha	Dffa	0.189822	0.17197	0.952255	0.447813	-	-			-0.0868216	0.0781202	0.917695	-0.213927	-	-			0			0	-	-			NaN	NaN	NaN	NaN				+					-	-			-0.276638	0.260405	0.725638	-0.62556
O54824	Il16	Pro-interleukin-16	Il16					-	-			1.36527	0.985215	0.243648	1.83736	-	-			0.0512904	0.0319556	0.993243	0.0915493	-	-			NaN	NaN	NaN	NaN			+		1.41656	0.840089	0.471079	1.72826	-	-			NaN	NaN	NaN	NaN
O54825	Bysl	Bystin	Bysl					-	-		+					-	-		+	-0.549617	0.351277	0.886279	-0.808564	-	-			-0.0432251	0.0150754	0.985891	-0.0449554									-	-		+	0.50642	0.628434	0.4167	1.31901
O54833	Csnk2a2	Casein kinase II subunit alpha'	Csnk2a2	-0.036876	0.0671575	0.970843	-0.185793	-	-			0.207891	0.797717	0.33165	1.52062	-	-			-0.121559	0.208552	0.933889	-0.510952	-	-			0.123197	0.174462	0.88531	0.438983					0.0863322	0.125105	0.921091	0.327948	-	-			0.244769	0.636838	0.411212	1.26864
O54865	Gucy1b1	Guanylate cyclase soluble subunit beta-1	Gucy1b1	1.08104	0.932689	0.63349	1.75821	-	-			0.477434	0.936184	0.265116	1.74012	-	-			-1.2497	2.97114	0.579	-4.73344	-	+			-1.85331	1.7949	0.144272	-3.04112					-0.772263	0.973666	0.396714	-1.89945	-	-			-0.60359	0.705102	0.367998	-1.37266
O54879	Hmgb3	High mobility group protein B3	Hmgb3	-0.112175	0.134987	0.963684	-0.352128	-	-			-0.596504	1.25715	0.154447	-2.20028	-	-			0.548997	0.954059	0.651397	1.79048	-	-			0.0646663	0.064489	0.953923	0.179501					-0.047507	0.0607191	0.953163	-0.170391	-	-			-0.484334	0.790486	0.321184	-1.5099
O54916	Reps1	RalBP1-associated Eps domain-containing protein 1	Reps1	-0.633097	0.699646	0.725314	-1.53453	-	-			-0.00630347	0.00909589	0.986447	-0.0269215	-	-			-0.438023	0.614975	0.765364	-1.26148	-	-			0.188766	0.128271	0.921216	0.344811					-0.444327	0.444625	0.725045	-1.00911	-	-			0.626799	0.94762	0.245585	1.81239
O54931	Akap2	A-kinase anchor protein 2	Akap2	-0.020599	0.057756	0.975772	-0.160771	-	-			0.303916	0.563043	0.476266	1.15262	-	-			-0.12878	0.165244	0.95741	-0.417722	-	-			0.195743	0.368215	0.747557	0.822364					0.175136	0.333215	0.800981	0.758167	-	-			0.3245	0.594468	0.443802	1.20252
O54941	Smarce1	SWI/SNF-related matrix-associated actin-dependent regulator of chromatin subfamily E member 1	Smarce1	-0.630421	1.12997	0.575438	-2.05322	-	-			0.129829	0.235449	0.760853	0.571729	-	-			-0.999379	0.788078	0.712268	-1.50633	-	-			-0.239117	0.122511	0.921382	-0.322822					-0.86955	0.443439	0.725774	-0.978957	-	-			0.76024	1.87179	0.0501728	2.94057
O54946	Dnajb6	DnaJ homolog subfamily B member 6	Dnajb6	-0.234114	0.373814	0.870056	-0.844641	-	-			0.036473	0.040155	0.957595	0.113752	-	-			-0.43066	0.370822	0.879286	-0.827075	-	-			-0.160046	0.103598	0.932482	-0.277352					-0.394187	0.320215	0.810041	-0.739594	-	-			0.270592	0.307957	0.68304	0.713101
O54950	Prkag1	5'-AMP-activated protein kinase subunit gamma-1	Prkag1	0.188743	0.295602	0.902797	0.68934	-	-			0.226485	0.445912	0.577081	0.958989	-	-			-0.0553439	0.135062	0.967254	-0.351207	-	-			-0.0176036	0.0305336	0.979994	-0.0876058					0.171141	0.222081	0.859419	0.543966	-	-			0.037745	0.115805	0.871098	0.305162
O54962	Banf1	Barrier-to-autointegration factor	Banf1	0.098805	0.06082	0.975856	0.169279	-	-			-0.326067	0.562903	0.476069	-1.15847	-	-			-0.875882	0.811631	0.700293	-1.5298	-	-			-1.30077	0.916318	0.400789	-1.69338					-1.20195	0.960283	0.40471	-1.77536	-	-			-0.424876	0.386776	0.612867	-0.8557
O54974	Lgals7	Galectin-7	Lgals7	0.245902	0.15631	0.954712	0.404765	-	-			-0.101286	0.0706532	0.925966	-0.194264	-	-			0.305137	0.188587	0.946521	0.472586	-	-			-0.0420251	0.0182015	0.984614	-0.0536502					0.203851	0.117274	0.926762	0.313063	-	-			-0.347203	0.231479	0.754629	-0.563525
O54984	Asna1	ATPase Asna1	Asna1	0.336553	0.388401	0.860335	0.86619	-	-			0.329009	0.558665	0.480153	1.15161	-	-			-0.24607	0.340571	0.889174	-0.774621	-	-			-0.25362	0.2533	0.828818	-0.608207					0.0829391	0.0909276	0.939138	0.247044	-	-			-0.00754316	0.00732725	0.989131	-0.0214512
O54988	Slk	STE20-like serine/threonine-protein kinase	Slk	-0.205217	0.21373	0.937767	-0.526419	-	-			0.0706008	0.228506	0.768272	0.555333	-	-			-0.262382	1.28414	0.563404	-2.20518	-	-			0.0134371	0.0118676	0.986493	0.0347419					-0.191781	0.585439	0.628005	-1.21293	-	-			0.275802	0.389978	0.611114	0.861404
O54992	Mapkapk5	MAP kinase-activated protein kinase 5	Mapkapk5	-0.517867	0.567897	0.789762	-1.27773	-	-			-0.569141	0.884579	0.291519	-1.80779	-	-			-0.228487	0.0955814	0.975118	-0.263814	-	-			-0.279767	0.0956363	0.935807	-0.267446					-0.797628	0.339236	0.796287	-0.820733	-	-			-0.0512827	0.0390496	0.951202	-0.113555
O54998	Fkbp7	Peptidyl-prolyl cis-trans isomerase FKBP7	Fkbp7					-	-			1.44062	1.19177	0.171994	2.26277	-	-			0			0	-	-			NaN	NaN	NaN	NaN									-	-			NaN	NaN	NaN	NaN
O55013	Trappc3	Trafficking protein particle complex subunit 3	Trappc3	-0.482346	0.722685	0.713806	-1.40827	-	-			0.1651	0.35596	0.652996	0.80009	-	-			-0.172326	0.184227	0.950068	-0.46026	-	-			0.47515	0.4583	0.677041	0.984484					-0.00722599	0.0056286	0.991341	-0.0165473	-	-			0.647462	1.38772	0.113607	2.31478
O55022	Pgrmc1	Membrane-associated progesterone receptor component 1	Pgrmc1	0.083024	0.128353	0.962151	0.335572	-	-			-0.162405	0.424361	0.594969	-0.921834	-	-			0.211593	0.687439	0.746692	1.33901	-	-			-0.0338383	0.0542246	0.962125	-0.151112					0.0491875	0.0802771	0.941624	0.218246	-	-			-0.245438	0.728652	0.356123	-1.4079
O55023	Impa1	Inositol monophosphatase 1	Impa1	-0.154401	0.118504	0.962108	-0.312343	-	-			0.269527	0.292389	0.708393	0.680845	-	-			0.190114	0.608517	0.765137	1.21888	-	-			0.614045	1.29593	0.255217	2.19425					0.459641	0.597899	0.621125	1.20792	-	-			0.423917	0.730908	0.355518	1.41126
O55026	Entpd2	Ectonucleoside triphosphate diphosphohydrolase 2	Entpd2	-0.658145	1.12372	0.578259	-1.98527	-	-			-0.26717	0.303382	0.698633	-0.701941	-	-			-0.0948222	0.0810671	0.982341	-0.219799	-	-			0.296162	0.314394	0.786284	0.722867					-0.361992	0.373188	0.775227	-0.831341	-	-			0.390976	0.539206	0.484661	1.11424
O55028	Bckdk	[3-methyl-2-oxobutanoate dehydrogenase [lipoamide]] kinase, mitochondrial	Bckdk	-0.181454	0.0896752	0.967224	-0.243911	-	-			-0.305025	0.208801	0.789405	-0.515987	-	-			-0.744831	0.568137	0.785885	-1.16693	-	-			-0.86841	0.540917	0.614824	-1.12974					-1.04986	0.866957	0.456822	-1.68506	-	-			-0.123593	0.0658857	0.922583	-0.181548
O55029	Copb2	Coatomer subunit beta'	Copb2	0.358544	1.16505	0.575558	2.04231	-	-			0.379407	1.35997	0.130339	2.27845	-	-			-0.143986	0.554698	0.790247	-1.13433	-	-			-0.123117	0.4321	0.691974	-0.935238					0.235421	0.584405	0.629187	1.18662	-	-			0.0208837	0.103921	0.883155	0.276635
O55033	Nck2	Cytoplasmic protein NCK2	Nck2	-0.149843	0.259927	0.920303	-0.624592	-	-			-0.284515	0.518716	0.510118	-1.09275	-	-			-0.74788	0.547992	0.79644	-1.14144	-	-			-0.882558	0.615429	0.567033	-1.26222					-1.0324	0.579673	0.631583	-1.23434	-	-			-0.134647	0.204273	0.780407	-0.503151
O55057	Pde6d	Retinal rod rhodopsin-sensitive cGMP 3',5'-cyclic phosphodiesterase subunit delta	Pde6d					-	-							-	-			0			0	-	-			NaN	NaN	NaN	NaN									-	-			NaN	NaN	NaN	NaN
O55060	Tpmt	Thiopurine S-methyltransferase	Tpmt	0.313555	0.124617	0.96054	0.33069	-	-			-0.367259	0.374078	0.637947	-0.851634	-	-			0			0	-	-			NaN	NaN	NaN	NaN				+					-	-			-0.68082	0.325072	0.669191	-0.752915
O55091	Impact	Protein IMPACT	Impact					-	-			0.759827	1.11375	0.195378	2.07228	-	-			-1.50007	1.3619	0.526195	-2.46007	-	-			NaN	NaN	NaN	NaN			+		-0.74024	0.339448	0.796573	-0.821173	-	-			NaN	NaN	NaN	NaN
O55098	Stk10	Serine/threonine-protein kinase 10	Stk10					-	-							-	-			0			0	-	-			NaN	NaN	NaN	NaN									-	-			NaN	NaN	NaN	NaN
O55100	Syngr1	Synaptogyrin-1	Syngr1	0.138698	0.172909	0.952881	0.445519	-	-			0.268578	0.361264	0.648166	0.821334	-	-			0			0	-	-			NaN	NaN	NaN	NaN				+					-	-			0.129892	0.170194	0.814483	0.433964
O55101	Syngr2	Synaptogyrin-2	Syngr2	0.0522457	0.0590155	0.975574	0.165127	-	-			0.363969	0.804068	0.328556	1.54389	-	-			-0.273504	0.362617	0.880782	-0.815293	-	-			0.0382336	0.0330385	0.977395	0.0945449					0.090465	0.0987441	0.934406	0.265469	-	-			0.311733	0.447651	0.561637	0.971384
O55102	Bloc1s1	Biogenesis of lysosome-related organelles complex 1 subunit 1	Bloc1s1					-	-							-	-			0			0	-	-			NaN	NaN	NaN	NaN									-	-			NaN	NaN	NaN	NaN
O55106	Strn	Striatin	Strn	-0.250603	0.354604	0.884096	-0.800591	-	-			0.331746	2.87392	0.015907	4.26274	+	-			-0.387836	0.672656	0.752246	-1.31682	-	-			0.194517	0.183889	0.875599	0.459529					-0.0560909	0.0640148	0.950771	-0.176708	-	-			0.582345	1.15265	0.173911	2.00364
O55111	Dsg2	Desmoglein-2	Dsg2	-0.314064	0.920535	0.640539	-1.69943	-	-			-0.479139	1.81552	0.0607556	-2.86813	-	-			0.158535	0.174209	0.9537	0.43744	-	-			-0.00653362	0.00563703	0.99172	-0.0165344					-0.320604	0.398684	0.757832	-0.876845	-	-			-0.165091	0.321159	0.671527	-0.735621
O55125	Nipsnap1	Protein NipSnap homolog 1	Nipsnap1	-0.0388279	0.0599586	0.975295	-0.166546	-	-			-1.19186	3.54786	0.00672	-5.22518	-	+			0.398096	0.64294	0.762665	1.27179	-	-			-0.754931	1.36105	0.232084	-2.27987					-0.793762	1.55125	0.205249	-2.52741	-	-			-1.153	3.11082	0.00633918	-4.59216		+
O55126	Nipsnap2	Protein NipSnap homolog 2	Nipsnap2	0.38893	0.74663	0.712484	1.44442	-	-			-0.258328	0.523943	0.507386	-1.08941	-	-			-0.466652	0.861491	0.685732	-1.59113	-	-			-1.11391	2.23566	0.0895686	-3.41126		+			-0.72498	1.30502	0.272962	-2.20624	-	-			-0.647221	1.73374	0.0638568	-2.76287
O55128	Sap18	Histone deacetylase complex subunit SAP18	Sap18	-0.490409	0.541194	0.789824	-1.12316	-	-			0.0794765	0.10727	0.881967	0.284728	-	-			-0.10663	0.102343	0.974472	-0.272255	-	-			0.463245	0.412455	0.709429	0.901074					-0.0271538	0.0197221	0.984701	-0.0569531	-	-			0.569888	0.917709	0.2598	1.68121
O55131	2007-09-01	Septin-7	2007-09-01	-0.533932	1.0234	0.602979	-1.84542	-	-			0.210648	0.627717	0.433876	1.25451	-	-			-0.041105	0.0762999	0.985091	-0.207786	-	-			0.703493	1.42374	0.21397	2.36182					0.169543	0.306942	0.81361	0.708729	-	-			0.744593	1.95493	0.043966	3.04767
O55142	Rpl35a	60S ribosomal protein L35a	Rpl35a	0.600676	0.948762	0.630208	1.73979	-	-			1.00941	1.17113	0.17755	2.02843	-	-			-0.416058	0.380727	0.878636	-0.842151	-	-			-0.00735455	0.00667466	0.991557	-0.019555					0.593351	0.674804	0.573567	1.32685	-	-			0.408717	0.434783	0.572816	0.939869
O55143	Atp2a2	Sarcoplasmic/endoplasmic reticulum calcium ATPase 2	Atp2a2	-0.378054	0.347543	0.884309	-0.787561	-	-			0.312696	0.880845	0.292659	1.62909	-	-			-0.827681	3.29316	0.345333	-4.70588	-	+			-0.13693	0.118134	0.923023	-0.310692					-0.514985	1.36115	0.254679	-2.28	-	-			0.690755	0.879949	0.277062	1.62782
O55201	Supt5h	Transcription elongation factor SPT5	Supt5h	0.194151	0.469999	0.821704	1.01007	-	-			0.309345	0.98117	0.245496	1.78584	-	-			0.154764	0.513287	0.81232	1.07718	-	-			0.269994	0.895535	0.409156	1.68034					0.464109	1.33035	0.265535	2.34925	-	-			0.115205	0.358529	0.637675	0.804778
O55222	Ilk	Integrin-linked protein kinase	Ilk	0.0237796	0.0386642	0.980316	0.109696	-	-			0.163684	0.327141	0.678554	0.746836	-	-			-0.514711	1.35842	0.525973	-2.25236	-	-			-0.374814	0.876378	0.414798	-1.62274					-0.351027	0.702407	0.555175	-1.36861	-	-			0.1399	0.324271	0.669316	0.741463
O55229	Chkb	Choline/ethanolamine kinase	Chkb	0.240773	0.172201	0.952106	0.43844	-	-			-0.199654	0.135498	0.85749	-0.354697	-	-			0.294442	0.269199	0.914218	0.643308	-	-			-0.146018	0.125566	0.920586	-0.331317					0.0947881	0.0761888	0.942138	0.21204	-	-			-0.440483	0.401852	0.601892	-0.88602
O55234	Psmb5	Proteasome subunit beta type-5	Psmb5	0.434076	1.28387	0.551814	2.20482	-	-			0.108208	0.211393	0.787321	0.518142	-	-			0.00966454	0.0215471	0.995334	0.0619833	-	-			-0.3162	1.42804	0.212282	-2.36742					0.117873	0.231391	0.85535	0.559607	-	-			-0.325871	1.52471	0.0906229	-2.49304
O55242	Sigmar1	Sigma non-opioid intracellular receptor 1	Sigmar1	0.966512	0.881202	0.650036	1.64277	-	-			0.932436	1.59419	0.0865799	2.58293	-	-			-0.0115663	0.0170495	0.99738	-0.0494908	-	-			-0.0456797	0.029057	0.980083	-0.0834984					0.920869	1.18039	0.314481	2.09161	-	-			-0.0340858	0.0263753	0.966204	-0.075624
O70133	Dhx9	ATP-dependent RNA helicase A	Dhx9	-0.222133	1.05419	0.598645	-1.88857	-	-			0.131028	1.14684	0.185429	1.99582	-	-			0.057715	0.155891	0.960595	0.396903	-	-			0.410871	1.36425	0.231292	2.28406					0.188743	0.543088	0.659445	1.12052	-	-			0.353157	2.58966	0.0145668	3.87795	+
O70138	Mmp8	Neutrophil collagenase	Mmp8					-	-							-	-			0			0	-	-			NaN	NaN	NaN	NaN									-	-			NaN	NaN	NaN	NaN
O70152	Dpm1	Dolichol-phosphate mannosyltransferase subunit 1	Dpm1	-0.187214	0.361795	0.877675	-0.813788	-	-			0.0352625	0.0635712	0.933258	0.175558	-	-			0.0516624	0.042434	0.991275	0.119426	-	-			0.274166	0.24009	0.838826	0.577364					0.086925	0.0619574	0.952819	0.171367	-	-			0.222481	1.45914	0.0999607	2.40792
O70172	Pip4k2a	Phosphatidylinositol 5-phosphate 4-kinase type-2 alpha	Pip4k2a	-0.148421	0.114411	0.962395	-0.306139	-	-			0.141442	0.143923	0.848958	0.372805	-	-			-0.159624	0.170689	0.956692	-0.431852	-	-			0.130242	0.103337	0.932265	0.277748					-0.0181824	0.0212726	0.984878	-0.0616379	-	-			0.289875	0.21706	0.769566	0.535822
O70194	Eif3d	Eukaryotic translation initiation factor 3 subunit D	Eif3d	0.127368	0.261915	0.91847	0.623167	-	-			0.605069	2.84702	0.0161786	4.22588	+	-			-0.189619	0.461633	0.842958	-0.982104	-	-			0.288083	0.58518	0.583174	1.18785					0.415451	1.00207	0.383065	1.79874	-	-			0.477712	1.89018	0.0482879	2.96425
O70200	Aif1	Allograft inflammatory factor 1	Aif1					-	-			1.17827	2.57258	0.020326	3.96251	+	-			0.0583621	0.0445552	0.991801	0.125367	-	-			NaN	NaN	NaN	NaN			+		1.23663	1.48539	0.22245	2.52119	-	-			NaN	NaN	NaN	NaN
O70209	Pdlim3	PDZ and LIM domain protein 3	Pdlim3	0.598132	1.13936	0.572108	2.00689	-	-			-0.260012	0.463266	0.560838	-0.98853	-	-			-0.491909	1.13763	0.606431	-1.96619	-	-			-1.35003	3.24294	0.0435385	-4.77984		+			-0.75192	1.984	0.130505	-3.08517	-	-			-0.858133	1.81508	0.055068	-2.86757
O70228	Atp9a	Probable phospholipid-transporting ATPase IIA	Atp9a	-0.451712	2.00241	0.410474	-3.35912	-	+			-0.224341	0.523699	0.507166	-1.10109	-	-			-0.233408	0.368102	0.878923	-0.834059	-	-			-0.00603294	0.0090387	0.987835	-0.026754					-0.45775	0.81	0.487162	-1.67452	-	-			0.227376	0.683888	0.382069	1.34064
O70250	Pgam2	Phosphoglycerate mutase 2	Pgam2	1.0815	1.05277	0.596166	1.90932	-	-			-0.753204	0.603667	0.449282	-1.21698	-	-			-1.07226	0.730394	0.738328	-1.43165	-	-			-2.90696	2.44712	0.0761887	-4.29883		+			-1.82546	1.42064	0.235404	-2.48251	-	-			-1.83471	1.93457	0.0451096	-3.08074
O70251	Eef1b	Elongation factor 1-beta	Eef1b	-0.329165	0.246674	0.930625	-0.59251	-	-			0.961888	1.38035	0.125794	2.30515	-	-			-0.822487	1.39098	0.511943	-2.29387	-	-			0.468569	0.446358	0.687092	0.959752					0.139401	0.0926746	0.937668	0.249144	-	-			1.29104	2.75068	0.0113633	4.09463	+
O70252	Hmox2	Heme oxygenase 2	Hmox2	0.352002	0.339403	0.887602	0.785867	-	-			0.296993	0.604771	0.4486	1.23403	-	-			0.293534	0.39907	0.873403	0.881072	-	-			0.238519	0.189024	0.872505	0.475553					0.590527	0.586443	0.626795	1.22794	-	-			-0.0550088	0.0646612	0.923896	-0.178799
O70258	Sgce	Epsilon-sarcoglycan	Sgce	-0.0955687	0.0827047	0.968941	-0.224882	-	-			-0.00343218	0.00463093	0.992035	-0.0135988	-	-			-0.352442	0.559069	0.790927	-1.15227	-	-			-0.2603	0.216233	0.854754	-0.531696					-0.355874	0.515468	0.678964	-1.0873	-	-			0.092186	0.0865526	0.898937	0.233966
O70274	Ptp4a2	Protein tyrosine phosphatase type IVA 2	Ptp4a2	-0.0965508	0.0748152	0.970352	-0.207199	-	-			-0.28657	0.336602	0.670839	-0.774915	-	-			-0.59671	0.62244	0.765332	-1.26238	-	-			-0.786721	0.706556	0.508942	-1.40886					-0.88328	0.703364	0.555032	-1.42211	-	-			-0.190004	0.2281	0.759273	-0.556515
O70279	Ess2	Splicing factor ESS-2 homolog	Ess2					-	-							-	-			0			0	-	-			NaN	NaN	NaN	NaN									-	-			NaN	NaN	NaN	NaN
O70293	Grk6	G protein-coupled receptor kinase 6	Grk6					-	-							-	-			0			0	-	-			NaN	NaN	NaN	NaN									-	-			NaN	NaN	NaN	NaN
O70305	Atxn2	Ataxin-2	Atxn2	0.145088	0.155566	0.954425	0.399373	-	-			0.526789	0.822627	0.318906	1.55735	-	-			-0.35259	0.485387	0.832077	-1.02573	-	-			0.0291332	0.0274485	0.980374	0.0787908					0.174199	0.262282	0.83956	0.626318	-	-			0.3817	0.450457	0.559582	0.966757
O70310	Nmt1	Glycylpeptide N-tetradecanoyltransferase 1	Nmt1	-0.498552	0.531169	0.79331	-1.10672	-	-			-0.161184	0.221673	0.776271	-0.539573	-	-			0.345952	0.637196	0.763079	1.26302	-	-			0.683329	0.898268	0.408678	1.65379					0.184768	0.363622	0.776143	0.81404	-	-			0.337371	0.322926	0.670469	0.738938
O70311	Nmt2	Glycylpeptide N-tetradecanoyltransferase 2	Nmt2	0.248255	0.106717	0.964284	0.291829	-	-			-0.0408065	0.0174281	0.97989	-0.0518382	-	-			0			0	-	-			NaN	NaN	NaN	NaN				+					-	-			-0.289075	0.131295	0.855881	-0.348871
O70318	Epb41l2	Band 4.1-like protein 2	Epb41l2	-0.764104	1.39306	0.512463	-2.35273	-	-			-0.0808468	0.131386	0.860597	-0.341791	-	-			-0.162162	0.169225	0.956612	-0.426507	-	-			0.521093	0.563844	0.596475	1.1539					-0.243009	0.216739	0.862466	-0.529318	-	-			0.683265	1.98243	0.0419306	3.08314
O70325	Gpx4	Phospholipid hydroperoxide glutathione peroxidase	Gpx4	-0.26628	0.777538	0.691778	-1.49066	-	-			-0.0794074	0.170652	0.824052	-0.430608	-	-			-0.325063	0.581238	0.777324	-1.18161	-	-			-0.138183	0.19495	0.869883	-0.48469					-0.404471	0.868126	0.457156	-1.62381	-	-			0.186904	0.374568	0.623369	0.833827
O70326	Grem1	Gremlin-1	Grem1					-	-							-	-			-0.697541	0.35722	0.884302	-0.828071	-	-			NaN	NaN	NaN	NaN			+						-	-			NaN	NaN	NaN	NaN
O70362	Gpld1	Phosphatidylinositol-glycan-specific phospholipase D	Gpld1					-	-							-	-			0			0	-	-			NaN	NaN	NaN	NaN									-	-			NaN	NaN	NaN	NaN
O70370	Ctss	Cathepsin S	Ctss	-0.719023	0.470757	0.822847	-1.01137	-	-			-0.0494022	0.0522771	0.946904	-0.146302	-	-			0.305874	0.316069	0.896865	0.731676	-	-			0.9755	0.566607	0.594196	1.18168					0.256472	0.21764	0.861801	0.540151	-	-			0.669614	0.537393	0.486298	1.1113
O70373	Xirp1	Xin actin-binding repeat-containing protein 1	Xirp1					-	-							-	-			0			0	-	-			NaN	NaN	NaN	NaN									-	-			NaN	NaN	NaN	NaN
O70378	Emc8	ER membrane protein complex subunit 8	Emc8	-0.0869134	0.0816183	0.968934	-0.222148	-	-			-0.102021	0.275705	0.723813	-0.64841	-	-			-0.0942053	0.132482	0.968067	-0.34361	-	-			-0.109312	0.0924673	0.937972	-0.248633					-0.196226	0.285915	0.825504	-0.668318	-	-			-0.0151119	0.0143273	0.978306	-0.0416188
O70400	Pdlim1	PDZ and LIM domain protein 1	Pdlim1	-0.721506	1.50358	0.511548	-2.50156	-	-			-0.717506	2.74415	0.0174331	-4.08579	-	+			-0.257823	0.260481	0.919131	-0.616733	-	-			-0.253857	0.20842	0.86208	-0.511899					-0.975329	1.29105	0.277442	-2.18782	-	-			0.00397146	0.00484291	0.991293	0.0142179
O70404	Vamp8	Vesicle-associated membrane protein 8	Vamp8	-0.519198	1.61068	0.48576	-2.64533	-	-			0.426501	1.7982	0.0628164	2.84584	-	-			0.174939	0.659646	0.75458	1.30372	-	-			1.12063	3.96312	0.06	6.1462	+				0.601439	2.77533	0.0928	4.2545	+	-			0.945679	3.50055	0.00403604	5.1549	+
O70421	Fzd1	Frizzled-1	Fzd1					-	-							-	-			0.150124	0.102612	0.974975	0.275971	-	-			NaN	NaN	NaN	NaN			+						-	-			NaN	NaN	NaN	NaN
O70423	Aoc3	Membrane primary amine oxidase	Aoc3	0.223182	0.709876	0.71783	1.38882	-	-			0.00352701	0.00595804	0.990177	0.0174697	-	-			-0.511511	1.0094	0.647131	-1.79502	-	-			-0.731162	1.63439	0.174005	-2.63482					-0.507984	1.0809	0.344231	-1.90669	-	-			-0.219662	0.479302	0.534834	-1.01554
O70433	Fhl2	Four and a half LIM domains protein 2	Fhl2	-0.0837169	0.0948823	0.965746	-0.258113	-	-			0.599384	0.872769	0.29639	1.66717	-	-			-0.313359	0.400481	0.873373	-0.887969	-	-			0.36974	0.525092	0.625739	1.1119					0.286025	0.307826	0.812905	0.724537	-	-			0.683087	1.29012	0.136303	2.24678
O70435	Psma3	Proteasome subunit alpha type-3	Psma3	-0.452161	1.51725	0.522124	-2.51992	-	-			-0.122895	0.307281	0.69637	-0.709373	-	-			0.020059	0.0227485	0.994991	0.0653547	-	-			0.349335	0.506376	0.641656	1.06057					-0.102836	0.11289	0.928432	-0.298212	-	-			0.329278	1.41636	0.108171	2.35219
O70439	Stx7	Syntaxin-7	Stx7	-0.502728	0.552836	0.789769	-1.15868	-	-			0.386204	0.780067	0.341521	1.48383	-	-			-0.153106	0.279763	0.911882	-0.65849	-	-			0.73585	0.901353	0.408524	1.7395					0.233097	0.282845	0.828501	0.667201	-	-			0.888949	1.73459	0.0639361	2.87171
O70456	Sfn	14-3-3 protein sigma	Sfn	-0.73044	1.477	0.505133	-2.46582	-	-			-0.302868	0.304947	0.697036	-0.704927	-	-			0.53821	0.610406	0.766833	1.2218	-	-			0.965783	1.76409	0.149967	2.80194					0.235342	0.292416	0.819563	0.680896	-	-			0.427569	0.468242	0.544515	0.996941
O70475	Ugdh	UDP-glucose 6-dehydrogenase	Ugdh	-0.175675	0.244654	0.929543	-0.588412	-	-			-1.23122	3.35194	0.00843411	-4.93702	-	+			0.424471	0.982209	0.653921	1.75811	-	-			-0.631102	1.30382	0.252337	-2.20467					-0.806746	1.66746	0.178218	-2.67747	-	-			-1.05554	3.09515	0.00645977	-4.57009		+
O70481	Ubr1	E3 ubiquitin-protein ligase UBR1	Ubr1	0.240971	0.256851	0.92466	0.627347	-	-			0.49155	0.581032	0.462402	1.20564	-	-			0			0	-	-	+		NaN	NaN	NaN	NaN				+					-	-	+		0.25058	0.276572	0.710084	0.652219
O70492	Snx3	Sorting nexin-3	Snx3	0.454927	1.44868	0.513118	2.42771	-	-			0.354203	0.978559	0.246895	1.76621	-	-			0.03582	0.0326531	0.994272	0.09283	-	-			-0.0649122	0.0574582	0.959713	-0.159617					0.390023	0.442568	0.72545	0.953258	-	-			-0.100726	0.210051	0.775246	-0.515328
O70493	Snx12	Sorting nexin-12	Snx12	0.455403	1.80831	0.477308	2.9106	-	-			0.218334	0.892279	0.28782	1.64531	-	-			0.0627098	0.12197	0.969963	0.31909	-	-			-0.174381	0.350538	0.759403	-0.790168					0.281043	0.648382	0.585468	1.28643	-	-			-0.237095	0.959139	0.24146	-1.73921
O70503	Hsd17b12	Very-long-chain 3-oxoacyl-CoA reductase	Hsd17b12	-0.562098	0.758758	0.698764	-1.46262	-	-			0.544288	2.08045	0.0411524	3.20977	+	-			-0.430413	1.28847	0.564866	-2.18442	-	-			0.67595	0.915294	0.400268	1.69191					0.113875	0.21289	0.865168	0.52279	-	-			1.10637	2.03341	0.0384845	3.14895	+
O70548	Tcap	Telethonin	Tcap	-0.51969	0.330603	0.893053	-0.776254	-	-			-1.26122	0.869835	0.297599	-1.68963	-	-			0			0	-	-			NaN	NaN	NaN	NaN				+					-	-			-0.741526	0.495236	0.519657	-1.05317
O70551	Srpk1	SRSF protein kinase 1	Srpk1	0.874957	1.89706	0.466744	3.03011	-	-			0.678832	1.77481	0.0653494	2.81574	-	-			-0.236517	0.553777	0.790908	-1.13287	-	-			-0.432633	0.940418	0.388983	-1.71307					0.442314	0.875979	0.457099	1.62217	-	-			-0.196104	0.411429	0.593969	-0.899277
O70566	Diaph2	Protein diaphanous homolog 2	Diaph2	0.188894	0.668506	0.740394	1.3649	-	-			0.549939	1.82105	0.0602849	3.08078	-	-			-0.420883	0.856297	0.686364	-1.64198	-	-			-0.0598551	0.088661	0.940476	-0.242506					0.129057	0.1711	0.894564	0.441418	-	-			0.361053	1.4336	0.104736	2.44851
O70570	Pigr	Polymeric immunoglobulin receptor	Pigr	-0.382954	0.80848	0.691185	-1.53652	-	-			-0.625069	0.903084	0.281923	-1.66059	-	-			0.651548	0.640364	0.763624	1.26786	-	-			0.409457	0.393321	0.729024	0.867345					0.0264785	0.0206011	0.984719	0.0594349	-	-			-0.2421	0.248357	0.737701	-0.594086
O70571	Pdk4	[Pyruvate dehydrogenase (acetyl-transferring)] kinase isozyme 4, mitochondrial	Pdk4					-	-							-	-			0			0	-	-			NaN	NaN	NaN	NaN									-	-			NaN	NaN	NaN	NaN
O70572	Smpd2	Sphingomyelin phosphodiesterase 2	Smpd2	0.0880192	0.142164	0.95879	0.37021	-	-			-0.37151	0.646002	0.421398	-1.29989	-	-			-0.238763	0.375226	0.880589	-0.842227	-	-			-0.698275	1.75356	0.150397	-2.97862					-0.610272	1.20283	0.302492	-2.28133	-	-			-0.459536	1.07981	0.196644	-1.90522
O70583	Mid1	E3 ubiquitin-protein ligase Midline-1	Mid1	0.559776	0.715088	0.715667	1.56465	-	-			0.747784	1.54051	0.0956881	2.85988	-	-			0			0	-	-			NaN	NaN	NaN	NaN				+					-	-			0.188014	0.222864	0.763619	0.55556
O70589	Cask	Peripheral plasma membrane protein CASK	Cask	-0.173015	0.204653	0.940316	-0.507164	-	-			-0.655488	1.78119	0.0648606	-2.87416	-	-			-0.0291488	0.0300425	0.993944	-0.086241	-	-			-0.511617	0.534027	0.617916	-1.12703					-0.684637	1.31893	0.268163	-2.39266	-	-			-0.482481	0.725684	0.357571	-1.40348
O70591	Pfdn2	Prefoldin subunit 2	Pfdn2	-0.477164	1.44722	0.510813	-2.42575	-	-			0.0438462	0.100473	0.88966	0.268259	-	-			-0.180335	0.34705	0.887558	-0.783761	-	-			0.3407	0.645672	0.547858	1.28991					-0.136489	0.265534	0.837537	-0.630378	-	-			0.521019	1.47494	0.0975185	2.42846
O70628	Pde9a	High affinity cGMP-specific 3',5'-cyclic phosphodiesterase 9A	Pde9a					-	-			1.20838	0.650985	0.418287	1.33594	-	-			0			0	-	-			NaN	NaN	NaN	NaN									-	-			NaN	NaN	NaN	NaN
O88207	Col5a1	Collagen alpha-1(V) chain	Col5a1	-1.18752	1.68954	0.478924	-2.75112	-	-			0.146173	0.216091	0.782936	0.527969	-	-			-0.574528	0.927643	0.655974	-1.69517	-	-			0.759183	0.836427	0.433995	1.57759					-0.428355	0.547017	0.65663	-1.13267	-	-			1.33369	2.24807	0.0270888	3.42745	+
O88271	Cfdp1	Craniofacial development protein 1	Cfdp1	0.191345	0.242166	0.930189	0.591827	-	-			0.468033	0.683697	0.395481	1.35921	-	-			0.347383	0.42371	0.857907	0.929361	-	-			0.624081	0.872766	0.415388	1.69427					0.815417	0.910639	0.43723	1.79473	-	-			0.27668	0.452663	0.55687	0.974812
O88286	Wiz	Protein Wiz	Wiz					-	-	+		-0.245896	0.223797	0.773585	-0.553244	-	-			-0.149108	0.09977	0.975604	-0.267989	-	-			NaN	NaN	NaN	NaN			+		-0.395004	0.195572	0.880282	-0.496171	-	-			NaN	NaN	NaN	NaN
O88291	Znf326	DBIRD complex subunit ZNF326	Znf326	0.315708	0.695917	0.726187	1.39196	-	-			-0.0557173	0.13974	0.853467	-0.363159	-	-			0.263716	0.44204	0.851287	0.956489	-	-			-0.10769	0.124187	0.920333	-0.326788					0.207999	0.220046	0.860785	0.545276	-	-			-0.371407	1.36274	0.118767	-2.28208
O88307	Sorl1	Sortilin-related receptor	Sorl1	0.159449	0.149458	0.957296	0.384262	-	-			0.385298	0.674068	0.400917	1.32573	-	-			0.154286	0.372717	0.877373	0.837637	-	-			0.380133	0.443876	0.688496	0.971288					0.539584	0.771016	0.51095	1.51023	-	-			0.225855	0.313163	0.678156	0.720537
O88310	Itln1	Intelectin-1a	Itln1					-	-							-	-			0			0	-	-			NaN	NaN	NaN	NaN				+					-	-			NaN	NaN	NaN	NaN
O88312	Agr2	Anterior gradient protein 2 homolog	Agr2	0.840873	1.02023	0.599308	1.84095	-	-			-0.147578	0.137116	0.855207	-0.355055	-	-			0.308001	0.240213	0.927088	0.576155	-	-			-0.680464	0.570886	0.590214	-1.16515					0.160423	0.126396	0.920019	0.330151	-	-			-0.98845	1.05804	0.204346	-1.87556
O88322	Nid2	Nidogen-2	Nid2	-0.0484934	0.074212	0.970101	-0.203372	-	-			0.432259	1.72514	0.0712031	2.75179	-	-			-0.595145	1.60368	0.429862	-2.56206	-	-			-0.114407	0.151408	0.907563	-0.387673					-0.162886	0.261006	0.84028	-0.619396	-	-			0.480736	1.39857	0.111496	2.32896
O88325	Naglu	Alpha-N-acetylglucosaminidase	Naglu	-0.16142	0.142921	0.958362	-0.373853	-	-			0.0806879	0.0578488	0.939607	0.161472	-	-			-0.167001	0.119166	0.972653	-0.316075	-	-			0.07512	0.0655681	0.954373	0.184275					-0.0863134	0.0688415	0.949403	-0.194539	-	-			0.242149	0.220286	0.765918	0.538273
O88327	Ctnnal1	Alpha-catulin	Ctnnal1	-0.469016	0.365875	0.875034	-0.829922	-	-			0.14813	0.155232	0.839915	0.397335	-	-			-0.0289972	0.0333292	0.993452	-0.0953481	-	-			0.58813	0.511454	0.636736	1.09931					0.119133	0.12367	0.921691	0.328427	-	-			0.617152	0.659509	0.397013	1.31143
O88329	Myo1a	Unconventional myosin-Ia	Myo1a	-0.183979	0.438634	0.839662	-0.95059	-	-			-0.823798	1.73681	0.06976	-2.76681	-	-			0.124416	0.0971517	0.975356	0.259623	-	-			-0.515413	0.538569	0.615672	-1.1132					-0.699382	0.761049	0.517274	-1.4559	-	-			-0.639827	1.43787	0.103977	-2.38023
O88342	Wdr1	WD repeat-containing protein 1	Wdr1	0.00333627	0.00696887	0.992722	0.0204565	-	-			0.0295228	0.12363	0.865183	0.323662	-	-			-0.194086	0.702118	0.744609	-1.3609	-	-			-0.167889	0.388807	0.732541	-0.85932					-0.164563	0.464082	0.712195	-0.98991	-	-			0.0261829	0.0694326	0.918034	0.190679
O88343	Slc4a4	Electrogenic sodium bicarbonate cotransporter 1	Slc4a4	0.211278	0.796313	0.69011	1.57246	-	-			-1.10398	1.95578	0.0492242	-3.42421	-	-			0.74614	1.0017	0.646521	1.94601	-	-			-0.569126	1.83136	0.137035	-3.38618					-0.357839	0.838118	0.471461	-1.72474	-	-			-1.31528	2.81247	0.010487	-4.70072		+
O88351	Ikbkb	Inhibitor of nuclear factor kappa-B kinase subunit beta	Ikbkb	-0.322736	0.474467	0.824638	-1.04713	-	-			0.479411	1.97047	0.0479868	3.30967	-	-			-0.321308	1.67888	0.411528	-2.73682	-	-			0.48084	1.11673	0.318085	2.03359					0.158103	0.446786	0.723812	0.996575	-	-			0.802138	2.5816	0.0147613	3.97535	+
O88379	Baz1a	Bromodomain adjacent to zinc finger domain protein 1A	Baz1a					-	-							-	-			0			0	-	-			NaN	NaN	NaN	NaN									-	-			NaN	NaN	NaN	NaN
O88384	Vti1b	Vesicle transport through interaction with t-SNAREs homolog 1B	Vti1b	0.272308	0.388788	0.860179	0.862694	-	-			0.437619	1.19405	0.171497	2.05908	-	-			0.0341091	0.0461029	0.99282	0.129271	-	-			0.199429	0.237852	0.838192	0.572812					0.471728	0.873101	0.45779	1.61808	-	-			0.165315	0.241125	0.743077	0.579465
O88393	Tgfbr3	Transforming growth factor beta receptor type 3	Tgfbr3					-	-							-	-			0			0	-	-			NaN	NaN	NaN	NaN									-	-			NaN	NaN	NaN	NaN
O88398	Avil	Advillin	Avil					-	-							-	-			0			0	-	-			NaN	NaN	NaN	NaN									-	-			NaN	NaN	NaN	NaN
O88441	Mtx2	Metaxin-2	Mtx2	-0.269746	0.367707	0.874165	-0.833325	-	-			0.027583	0.027926	0.968789	0.0803442	-	-			-0.444711	0.494294	0.827359	-1.05157	-	-			-0.147399	0.132549	0.920182	-0.347789					-0.417128	0.569401	0.638224	-1.18633	-	-			0.297303	0.317963	0.674075	0.735296
O88447	Klc1	Kinesin light chain 1	Klc1	0.535396	0.303981	0.897145	0.716968	-	-			-0.256401	0.165427	0.829269	-0.421556	-	-			-0.425129	0.284759	0.909946	-0.670968	-	-			-1.21695	0.792156	0.453522	-1.56579					-0.68153	0.380307	0.771578	-0.872314	-	-			-0.791814	0.662961	0.394752	-1.31678
O88448	Klc2	Kinesin light chain 2	Klc2	0.0811704	0.101017	0.964188	0.270241	-	-			0.049225	0.0903281	0.901392	0.243345	-	-			-0.485228	1.96755	0.421479	-3.12533	-	-			-0.51719	0.999483	0.356546	-1.83236					-0.436003	0.878436	0.456721	-1.65504	-	-			-0.0319638	0.0522448	0.93412	-0.145879
O88451	Rdh7	Retinol dehydrogenase 7	Rdh7	0.578217	0.974724	0.623951	1.96949	-	-			-0.153833	0.133135	0.860123	-0.350911	-	-			0			0	-	-			NaN	NaN	NaN	NaN				+					-	-			-0.732047	0.760039	0.337789	-1.54304
O88456	Capns1	Calpain small subunit 1	Capns1	0.474868	0.823078	0.686091	1.55802	-	-			0.138925	0.282292	0.718024	0.661276	-	-			0.000974928	0.00157794	0.999285	0.00464104	-	-			-0.334969	0.55476	0.603865	-1.13934					0.1399	0.220763	0.860204	0.537688	-	-			-0.335969	0.683378	0.382185	-1.33987
O88487	Dync1i2	Cytoplasmic dynein 1 intermediate chain 2	Dync1i2	-0.0610196	0.111679	0.96496	-0.296046	-	-			-0.131783	0.320671	0.682938	-0.734703	-	-			0.137491	0.226422	0.926401	0.548037	-	-			0.0667493	0.0885289	0.939959	0.238883					0.00570738	0.00632448	0.991179	0.0185364	-	-			-0.0707365	0.236081	0.750003	-0.569202
O88492	Plin4	Perilipin-4	Plin4	-0.219419	0.310793	0.897743	-0.71852	-	-			-0.371211	1.04849	0.220432	-1.86252	-	-			-0.429344	1.15274	0.604752	-1.98609	-	-			-0.581131	1.07094	0.329886	-1.89315					-0.800555	2.32921	0.0985614	-3.5335	-	+			-0.151759	0.216094	0.770223	-0.527975
O88512	Ap1g2	AP-1 complex subunit gamma-like 2	Ap1g2	-0.367737	0.464263	0.825752	-0.994681	-	-			-0.0418422	0.0499228	0.949638	-0.139716	-	-			-0.340486	0.448927	0.849476	-0.960639	-	-			-0.0145942	0.0120075	0.986675	-0.0349698					-0.382328	0.421147	0.738083	-0.916246	-	-			0.32592	0.523097	0.496333	1.08802
O88520	Shoc2	Leucine-rich repeat protein SHOC-2	Shoc2	-0.274531	0.199969	0.943051	-0.499308	-	-			0.48132	3.03617	0.0133257	4.84074	+	-			-0.199147	0.473679	0.838425	-1.01639	-	-			0.5567	0.437484	0.691612	0.959956					0.282173	0.517094	0.67843	1.12384	-	-			0.755872	1.03998	0.208413	1.85086
O88531	Ppt1	Palmitoyl-protein thioesterase 1	Ppt1	0.142712	0.127422	0.961114	0.335711	-	-			-0.100104	0.0918453	0.900424	-0.247692	-	-			0.281691	0.325096	0.895099	0.74888	-	-			0.038845	0.0368693	0.975232	0.105931					0.181587	0.11705	0.926429	0.312524	-	-			-0.242809	0.488263	0.526242	-1.03536
O88532	Zfr	Zinc finger RNA-binding protein	Zfr	0.223519	0.361164	0.877199	0.827321	-	-			-0.169986	0.827298	0.317002	-1.57882	-	-			-0.347624	0.678806	0.751078	-1.35156	-	-			-0.741139	0.998744	0.356398	-1.89261					-0.51761	0.74626	0.526271	-1.51982	-	-			-0.393526	1.0581	0.204447	-1.89404
O88533	Ddc	Aromatic-L-amino-acid decarboxylase	Ddc	0.0705196	0.0662954	0.971574	0.184214	-	-			-0.993706	0.697529	0.386524	-1.41257	-	-			-0.184821	0.0847073	0.98118	-0.233957	-	-			-1.249	1.82036	0.139761	-3.19728					-1.17853	1.15243	0.322516	-2.29283	-	-			-1.06418	1.05759	0.204092	-1.91624
O88543	Cops3	COP9 signalosome complex subunit 3	Cops3	-0.0382824	0.0535228	0.978438	-0.149605	-	-			0.25118	0.713243	0.37947	1.38488	-	-			-0.0607281	0.325613	0.895512	-0.741791	-	-			0.228738	0.666417	0.532682	1.31407					0.190452	0.518531	0.67711	1.08055	-	-			0.289438	0.870745	0.281763	1.61472
O88544	Cops4	COP9 signalosome complex subunit 4	Cops4	-0.089166	0.446896	0.836207	-0.96488	-	-			0.168261	1.1197	0.19407	1.95925	-	-			-0.256507	0.945876	0.655245	-1.70842	-	-			0.00091194	0.00190264	0.993796	0.00560454					-0.0882461	0.218757	0.860212	-0.533521	-	-			0.257426	2.06909	0.0364867	3.19507	+
O88545	Cops6	COP9 signalosome complex subunit 6	Cops6	0.70118	0.898902	0.650228	1.66833	-	-			0.722047	1.05587	0.216777	1.8726	-	-			-0.152124	0.242811	0.925316	-0.581404	-	-			-0.131252	0.184196	0.875604	-0.460194					0.569923	0.642072	0.590774	1.27671	-	-			0.0208624	0.0421797	0.946712	0.118969
O88559	Men1	Menin	Men1					-	-							-	-			0			0	-	-			NaN	NaN	NaN	NaN									-	-			NaN	NaN	NaN	NaN
O88561	Slc27a3	Long-chain fatty acid transport protein 3	Slc27a3					-	-			1.47262	3.26158	0.00949296	5.99027	+	-			0			0	-	-			NaN	NaN	NaN	NaN									-	-			NaN	NaN	NaN	NaN
O88569	Hnrnpa2b1	Heterogeneous nuclear ribonucleoproteins A2/B1	Hnrnpa2b1	-0.181433	0.529408	0.793641	-1.10382	-	-			-0.17579	0.588768	0.457513	-1.19352	-	-			0.276052	1.13646	0.604449	1.96465	-	-			0.281693	1.00418	0.354924	1.80166					0.100261	0.281425	0.830421	0.659587	-	-			0.00562123	0.012728	0.981138	0.0370385
O88587	Comt	Catechol O-methyltransferase	Comt	0.963438	0.596804	0.777251	1.21289	-	-			1.33399	1.0112	0.232361	1.81133	-	-			-1.2567	1.58644	0.433908	-2.61282	-	-			-0.886167	0.932926	0.392079	-1.73535					0.0772822	0.0303117	0.979027	0.0869892	-	-			0.370562	0.400408	0.602888	0.879892
O88593	Pglyrp1	Peptidoglycan recognition protein 1	Pglyrp1					-	-			1.90746	3.24612	0.00986111	4.78439	+	-			0.093892	0.105441	0.974798	0.280314	-	-			NaN	NaN	NaN	NaN			+		2.00135	2.68253	0.0909286	4.11997	+	-			NaN	NaN	NaN	NaN
O88597	Becn1	Beclin-1	Becn1					-	-							-	-			0			0	-	-			NaN	NaN	NaN	NaN				+					-	-			-0.337485	0.419134	0.586134	-0.934925
O88622	Parg	Poly(ADP-ribose) glycohydrolase	Parg					-	-							-	-			0			0	-	-			NaN	NaN	NaN	NaN									-	-			NaN	NaN	NaN	NaN
O88630	Gosr1	Golgi SNAP receptor complex member 1	Gosr1	1.02694	0.814368	0.686991	1.63422	-	-			-0.109608	0.172314	0.822661	-0.438694	-	-			0			0	-	-			NaN	NaN	NaN	NaN				+					-	-			-1.13657	1.59649	0.0808884	-2.62629
O88643	Pak1	Serine/threonine-protein kinase PAK 1	Pak1					-	-							-	-			-0.734036	0.321081	0.896535	-0.782903	-	-			-0.3058	0.126573	0.921517	-0.340692									-	-			0.428267	0.380964	0.617612	0.886498
O88653	Lamtor3	Ragulator complex protein LAMTOR3	Lamtor3	0.0150448	0.00999867	0.99142	0.0299835	-	-			-0.841318	0.578197	0.464587	-1.25746	-	-			0			0	-	-			NaN	NaN	NaN	NaN				+					-	-			-0.856425	0.78108	0.326563	-1.57842
O88668	Creg1	Protein CREG1	Creg1					-	-							-	-			0			0	-	-			NaN	NaN	NaN	NaN									-	-			NaN	NaN	NaN	NaN
O88673	Dgka	Diacylglycerol kinase alpha	Dgka					-	-			-0.730196	0.593484	0.456527	-1.23983	-	-			0			0	-	-			NaN	NaN	NaN	NaN									-	-			NaN	NaN	NaN	NaN
O88685	Psmc3	26S proteasome regulatory subunit 6A	Psmc3	-0.0816269	0.116058	0.963468	-0.306521	-	-			0.501137	2.06524	0.0420475	3.19009	+	-			-0.385409	0.890743	0.672454	-1.64313	-	-			0.197351	0.252219	0.830063	0.603719					0.115729	0.159865	0.901937	0.407756	-	-			0.582765	1.67824	0.0704	2.69136
O88696	Clpp	ATP-dependent Clp protease proteolytic subunit, mitochondrial	Clpp	0.458997	1.23969	0.564287	2.14461	-	-			-0.109579	0.321109	0.682771	-0.735527	-	-			0.360586	0.645204	0.764039	1.27525	-	-			-0.207981	0.263506	0.824221	-0.624362					0.251007	0.39271	0.76386	0.86626	-	-			-0.568567	1.57911	0.082832	-2.56343
O88712	Ctbp1	C-terminal-binding protein 1	Ctbp1	0.349621	0.700867	0.724685	1.37508	-	-			0.147127	0.229443	0.767626	0.555609	-	-			-0.0803585	0.10309	0.97561	-0.274064	-	-			-0.282836	0.448952	0.684966	-0.964187					0.0667682	0.0825701	0.940556	0.22401	-	-			-0.202479	0.345166	0.651469	-0.780292
O88735	Map7	Ensconsin	Map7	0.432959	0.708316	0.717225	1.39754	-	-			-0.672513	0.969814	0.250165	-1.76974	-	-			0.406891	0.495186	0.827753	1.04699	-	-			-0.69857	1.23412	0.275109	-2.16774					-0.265622	0.315187	0.812542	-0.733894	-	-			-1.10548	2.10268	0.0347036	-3.23854		+
O88736	Hsd17b7	3-keto-steroid reductase	Hsd17b7					-	-							-	-			0			0	-	-			NaN	NaN	NaN	NaN				+					-	-			0.152807	0.0978746	0.888159	0.26725
O88738	Birc6	Baculoviral IAP repeat-containing protein 6	Birc6	0.299205	0.327217	0.89306	0.757022	-	-			0.275433	1.42559	0.115948	2.43726	-	-			-0.325665	0.827722	0.69046	-1.56483	-	-			-0.349447	0.38989	0.731509	-0.868885					-0.0502317	0.0692519	0.950059	-0.19278	-	-			-0.0237956	0.0276669	0.964014	-0.0792188
O88746	Tom1	Target of Myb protein 1	Tom1	-0.278949	0.391569	0.860493	-0.867677	-	-			-0.345725	0.849174	0.307172	-1.5839	-	-			-0.194654	0.250681	0.920777	-0.597221	-	-			-0.261431	0.273101	0.817194	-0.6433					-0.540379	0.736976	0.534567	-1.42029	-	-			-0.0667737	0.0954597	0.890794	-0.255999
O88796	Rpp30	Ribonuclease P protein subunit p30	Rpp30	-0.0859063	0.0506268	0.980913	-0.147376	-	-			0.142638	0.166642	0.828724	0.426009	-	-			0			0	-	-			NaN	NaN	NaN	NaN				+					-	-			0.228515	0.247988	0.738011	0.600248
O88811	Stam2	Signal transducing adapter molecule 2	Stam2	0.92025	1.29133	0.552167	2.21496	-	-			0.415822	0.685841	0.393579	1.3436	-	-			-0.0965691	0.197772	0.941111	-0.488207	-	-			-0.60099	1.10399	0.319691	-1.93801					0.319253	0.504648	0.685059	1.05771	-	-			-0.504419	0.852336	0.290282	-1.58843
O88845	Akap10	A-kinase anchor protein 10, mitochondrial	Akap10					-	-			-0.519698	0.187057	0.809316	-0.473828	-	-			0			0	-	-			NaN	NaN	NaN	NaN									-	-			NaN	NaN	NaN	NaN
O88851	Rbbp9	Putative hydrolase RBBP9	Rbbp9	-0.115255	0.116852	0.962841	-0.309351	-	-			-0.401149	0.971534	0.24933	-1.77218	-	-			-0.174793	0.21876	0.92779	-0.537008	-	-			-0.460708	0.442614	0.689213	-0.969054					-0.575942	0.838771	0.471886	-1.64028	-	-			-0.285898	0.389884	0.611072	-0.861236
O88874	Ccnk	Cyclin-K	Ccnk	0.197489	0.106249	0.964083	0.288077	-	-			0.609846	0.623774	0.435911	1.27584	-	-			-0.468226	1.1261	0.605628	-2.04748	-	-			-0.0558743	0.0427571	0.971157	-0.122848					0.14162	0.0671885	0.949887	0.192586	-	-			0.412346	0.654042	0.400239	1.30294
O88879	Apaf1	Apoptotic protease-activating factor 1	Apaf1	-0.805163	0.691214	0.72936	-1.42656	-	-			0.192605	0.229135	0.767409	0.558665	-	-			-0.105123	0.0892444	0.979205	-0.241237	-	-			0.892625	0.669442	0.530979	1.36644					0.0874823	0.04427	0.96654	0.126245	-	-			0.997754	2.15342	0.031917	3.47224	+
O88895	Hdac3	Histone deacetylase 3	Hdac3					-	-							-	-			-0.244403	0.291848	0.90727	-0.707809	-	-			-0.694699	0.537236	0.616085	-1.21774									-	-			-0.450274	0.429531	0.576742	-0.980349
O88907	Pias1	E3 SUMO-protein ligase PIAS1	Pias1					-	-							-	-		+	0			0	-	-	+		NaN	NaN	NaN	NaN									-	-			NaN	NaN	NaN	NaN
O88935	Syn1	Synapsin-1	Syn1	0.0259291	0.0313362	0.984015	0.089833	-	-			0.221437	0.385611	0.628115	0.856988	-	-			-0.328233	0.471753	0.837689	-1.02954	-	-			-0.13276	0.139315	0.914789	-0.367897					-0.106796	0.0937492	0.936613	-0.255282	-	-			0.19549	0.441157	0.567818	0.960047
O88939	Zbtb7a	Zinc finger and BTB domain-containing protein 7A	Zbtb7a	0.172559	0.0906444	0.966936	0.251243	-	-			-0.175361	0.248645	0.751011	-0.60527	-	-			0			0	-	-			NaN	NaN	NaN	NaN				+					-	-			-0.347925	0.292027	0.69519	-0.688722
O88952	Lin7c	Protein lin-7 homolog C	Lin7c	-0.836472	0.996264	0.614088	-1.80719	-	-			-0.335376	0.567346	0.472902	-1.1595	-	-			-0.133667	0.147813	0.963939	-0.378708	-	-			0.367424	0.325198	0.780054	0.7432					-0.469044	0.580898	0.630441	-1.18107	-	-			0.501096	0.601799	0.437687	1.21405
O88967	Yme1l1	ATP-dependent zinc metalloprotease YME1L1	Yme1l1	-0.000876745	0.000402069	0.993695	-0.00121885	-	-			-0.247835	0.648236	0.4203	-1.35309	-	-			0			0	-	-			NaN	NaN	NaN	NaN				+					-	-			-0.246936	0.186341	0.798266	-0.472249
O88968	Tcn2	Transcobalamin-2	Tcn2					-	-							-	-			0			0	-	-			NaN	NaN	NaN	NaN				+					-	-			-0.688794	0.805799	0.313275	-1.61987
O88974	Setdb1	Histone-lysine N-methyltransferase SETDB1	Setdb1					-	-							-	-		+	0			0	-	-	+		NaN	NaN	NaN	NaN									-	-			NaN	NaN	NaN	NaN
O88983	Stx8	Syntaxin-8	Stx8	-0.300536	0.31518	0.893862	-0.733881	-	-			0.132591	0.222488	0.775519	0.542858	-	-			0.264523	0.694189	0.746838	1.35622	-	-			0.69766	1.12093	0.318564	2.00698					0.397115	1.1379	0.325973	2.03118	-	-			0.433117	0.591897	0.445415	1.20507
O88986	Gcat	2-amino-3-ketobutyrate coenzyme A ligase, mitochondrial	Gcat					-	-			1.8867	1.49443	0.103104	2.7792	-	-			0			0	-	-			NaN	NaN	NaN	NaN									-	-			NaN	NaN	NaN	NaN
O88990	Actn3	Alpha-actinin-3	Actn3	1.01692	0.45947	0.826844	0.991907	-	-			-0.193611	0.0725359	0.923914	-0.198621	-	-			-1.38171	0.755369	0.726658	-1.45754	-	-			-2.59224	1.5771	0.181966	-2.71436					-1.57532	0.739671	0.532155	-1.44592	-	-			-1.21053	0.695541	0.374836	-1.36694
O89016	Abcd4	ATP-binding cassette sub-family D member 4	Abcd4	-0.198654	0.345207	0.885085	-0.833103	-	-			-0.170396	0.398913	0.615624	-0.897827	-	-			0.0569836	0.0880665	0.980191	0.241006	-	-			0.0852674	0.0948184	0.935482	0.265338					-0.113412	0.143538	0.913289	-0.386862	-	-			0.0282838	0.0477551	0.939353	0.135711
O89017	Lgmn	Legumain	Lgmn	0.214715	0.0942458	0.966086	0.256523	-	-			0.101599	0.0543884	0.944442	0.152864	-	-			0.89223	0.411558	0.867234	0.921077	-	-			0.779067	0.273913	0.816746	0.662573					0.993829	0.421991	0.737932	0.965912	-	-			-0.11315	0.0516072	0.934962	-0.144931
O89023	Tpp1	Tripeptidyl-peptidase 1	Tpp1	-0.0576801	0.0195317	0.989174	-0.0571499	-	-			0.0645221	0.0532293	0.946197	0.150456	-	-			0.241567	0.218321	0.927729	0.541604	-	-			0.36375	0.136049	0.917016	0.357776					0.306089	0.29329	0.819756	0.724277	-	-			0.1222	0.0603091	0.926849	0.167463
O89029	Matn4	Matrilin-4	Matn4	0.577555	1.11199	0.582681	2.21854	-	-			-0.255736	0.231199	0.765897	-0.579758	-	-			0			0	-	-			NaN	NaN	NaN	NaN				+					-	-			-0.8333	0.715791	0.364176	-1.56603
O89051	Itm2b	Integral membrane protein 2B	Itm2b	-0.234064	0.539371	0.788978	-1.14764	-	-			-0.216482	1.45149	0.110639	-2.47362	-	-			0.426456	1.11056	0.602522	1.96703	-	-			0.444041	0.715564	0.503049	1.42313					0.209975	0.378288	0.77138	0.847817	-	-			0.0175748	0.0362297	0.95442	0.103696
O89053	Coro1a	Coronin-1A	Coro1a	-1.04551	1.87399	0.465826	-2.99901	-	-			1.36918	2.41971	0.0253653	3.65245	+	-			0.274506	0.354947	0.884684	0.795769	-	-			2.68918	5.38343	0.016	8.39142	+				1.64368	3.10606	0.1088	4.58545	+	-			2.41468	4.71671	0.000235294	7.12899	+
O89079	Cope	Coatomer subunit epsilon	Cope	-0.0874408	0.138455	0.962331	-0.359057	-	-			-0.182484	0.449358	0.574571	-0.96488	-	-			-0.0434559	0.047702	0.991905	-0.133541	-	-			-0.138495	0.144016	0.912838	-0.370884					-0.22594	0.25709	0.843811	-0.611596	-	-			-0.0950237	0.194691	0.791455	-0.482779
O89086	Rbm3	RNA-binding protein 3	Rbm3	-1.17607	1.07229	0.587575	-1.91384	-	-			-0.361499	0.416331	0.601162	-0.907851	-	-			0.147765	0.0826439	0.980502	0.22375	-	-			0.962314	0.574402	0.588363	1.17075					-0.213734	0.11603	0.927189	-0.305695	-	-			0.814557	0.714051	0.364018	1.38609
O89094	Casp14	Caspase-14	Casp14	-0.481824	0.730202	0.713497	-1.43136	-	-			-0.92609	1.7475	0.068733	-2.78058	-	-			0.568491	0.698834	0.744411	1.36323	-	-			0.124243	0.102529	0.931869	0.274743					-0.357599	0.32849	0.803357	-0.752029	-	-			-0.444254	0.869381	0.28205	-1.62563
O89103	Cd93	Complement component C1q receptor	Cd93					-	-							-	-			0			0	-	-			NaN	NaN	NaN	NaN									-	-			NaN	NaN	NaN	NaN
O89104	Sypl2	Synaptophysin-like protein 2	Sypl2					-	-			-0.543945	0.613251	0.442627	-1.32128	-	-			0			0	-	-			NaN	NaN	NaN	NaN									-	-			NaN	NaN	NaN	NaN
O89106	Fhit	Bis(5'-adenosyl)-triphosphatase	Fhit	0.510049	0.31126	0.897752	0.731279	-	-			-1.22248	1.10967	0.196301	-2.12557	-	-			0			0	-	-			NaN	NaN	NaN	NaN				+					-	-			-1.73252	2.04852	0.0380075	-3.31982		+
O89110	Casp8	Caspase-8	Casp8	0.34344	0.502011	0.812711	1.07253	-	-			-0.164781	0.220726	0.777469	-0.54113	-	-			0.451324	0.668607	0.75367	1.33556	-	-			-0.0569086	0.0566886	0.960688	-0.158973					0.286542	0.309566	0.812353	0.73463	-	-			-0.508234	1.02042	0.216128	-1.82402
O89112	Lancl1	LanC-like protein 1	Lancl1	-0.0297114	0.0202828	0.989148	-0.0601439	-	-			-0.856988	0.749147	0.360118	-1.47603	-	-			0.189061	0.114945	0.971451	0.305943	-	-			-0.638183	0.486221	0.655893	-1.08754					-0.667927	0.813395	0.485707	-1.63259	-	-			-0.82725	0.533004	0.489037	-1.13667
O89114	Dnajb5	DnaJ homolog subfamily B member 5	Dnajb5	-0.0462907	0.0409296	0.980524	-0.116587	-	-			-1.05688	0.639473	0.4259	-1.28953	-	-			-0.76516	0.370254	0.878169	-0.833124	-	-			-1.77573	1.73378	0.152882	-2.94879					-1.82204	1.35633	0.255509	-2.54099	-	-			-1.01056	0.78953	0.321775	-1.49766
P00158	Mt-Cyb	Cytochrome b	Mt-Cyb	0.526932	0.433328	0.842265	0.960711	-	-			-0.228237	0.19783	0.796968	-0.492557	-	-			-0.126081	0.0773489	0.985269	-0.212732	-	-			-0.88124	0.584155	0.582814	-1.24217					-0.354318	0.193423	0.882524	-0.496518	-	-			-0.755168	0.876387	0.278787	-1.63579
P00329	Adh1	Alcohol dehydrogenase 1	Adh1	-0.725648	0.511952	0.802802	-1.07496	-	-			-1.47443	2.54715	0.0213823	-3.82127	-	+			-0.0747667	0.0459917	0.992313	-0.128974	-	-			-0.823552	0.491045	0.650897	-1.03516					-1.5492	1.6455	0.180994	-2.64916	-	-			-0.748809	0.548381	0.477935	-1.12907
P00375	Dhfr	Dihydrofolate reductase	Dhfr	-0.0803286	0.125429	0.961999	-0.330992	-	-			0.229115	0.42281	0.595414	0.91914	-	-			-0.168696	0.361671	0.881207	-0.810497	-	-			0.1407	0.407786	0.713953	0.906748					0.0604188	0.113589	0.929331	0.300625	-	-			0.309407	0.599909	0.439205	1.22619
P00397	Mtco1	Cytochrome c oxidase subunit 1	Mtco1					-	-		+					-	-		+	0			0	-	-	+		NaN	NaN	NaN	NaN				+					-	-			-0.460083	0.105928	0.881183	-0.28986
P00405	Mtco2	Cytochrome c oxidase subunit 2	Mtco2	-0.301683	0.847575	0.671538	-1.59389	-	-			-0.726653	2.90892	0.0154951	-4.31088	-	+			0.0427036	0.0468982	0.992488	0.131396	-	-			-0.382274	0.514613	0.634281	-1.07412					-0.68395	1.24665	0.292676	-2.12909	-	-			-0.424974	1.05095	0.205868	-1.86587
P00416	mt-Co3	Cytochrome c oxidase subunit 3	mt-Co3	1.38157	1.36226	0.532	2.34831	-	-			-0.579095	0.400475	0.614286	-0.883573	-	-			0.123881	0.0736051	0.9853	0.202405	-	-			-1.83677	2.26459	0.0865306	-3.7736		+			-0.455215	0.241363	0.84926	-0.590154	-	-			-1.96064	2.81275	0.0105328	-4.17904		+
P00493	Hprt1	Hypoxanthine-guanine phosphoribosyltransferase	Hprt1	-0.747907	1.27487	0.551552	-2.19258	-	-			-0.00546356	0.0101168	0.985907	-0.0295255	-	-			0.144909	0.242419	0.92517	0.583868	-	-			0.887344	1.24214	0.271568	2.17907					0.139445	0.230206	0.855384	0.560888	-	-			0.742455	1.36084	0.119026	2.27959
P00688	Amy2	Pancreatic alpha-amylase	Amy2					-	-							-	-			-3.62805	1.06667	0.621307	-2.05398	-	-			NaN	NaN	NaN	NaN			+						-	-			NaN	NaN	NaN	NaN
P00920	Ca2	Carbonic anhydrase 2	Ca2	-0.398863	0.89245	0.648747	-1.65902	-	-			-2.71042	4.51202	0.00207407	-6.76958	-	+			0.6393	0.646737	0.763612	1.27758	-	-			-1.67227	2.6018	0.0725195	-3.89419		+			-2.07112	3.54371	0.106667	-5.219	-	+			-2.31157	3.62593	0.00387755	-5.34215		+
P01027	C3	Complement C3	C3	-0.214586	0.527244	0.794468	-1.10026	-	-			2.0531	4.78705	0.0024	7.2554	+	-			-0.690257	0.786085	0.712343	-1.48379	-	-			1.57743	2.27339	0.0865	3.46048	+				1.36284	2.00091	0.127403	3.10698	+	-			2.2677	4.83344	0.00025	7.3396	+
P01029	C4b	Complement C4-B	C4b	-0.603134	0.622525	0.766892	-1.28859	-	-			1.70214	2.62925	0.0194639	4.04341	+	-			-0.426856	0.424231	0.858055	-0.921608	-	-			1.87842	2.02822	0.109512	3.39925	+				1.27529	1.20356	0.302818	2.12448	-	-			2.30527	4.41505	0.000324324	7.46146	+
P01592	Jchain	Immunoglobulin J chain	Jchain	-0.774531	0.423386	0.842401	-0.953323	-	-			-1.0269	1.12	0.194003	-2.1428	-	-			0.11932	0.0787242	0.98493	0.220489	-	-			-0.133042	0.0488187	0.966099	-0.140595					-0.907578	1.47236	0.224886	-2.90228	-	-			-0.252349	0.103891	0.883012	-0.282238
P01631	-	Ig kappa chain V-II region 26-10	-	-0.892025	0.769316	0.695009	-1.47841	-	-			-1.10564	1.8358	0.0590085	-2.89424	-	-			1.1107	1.6711	0.412683	2.68216	-	-			0.897066	0.736093	0.491384	1.42855					0.00506179	0.00378972	0.990449	0.0111645	-	-			-0.213631	0.150952	0.833586	-0.386642
P01633	Igk-V19-17	Ig kappa chain V19-17	Igk-V19-17	-1.84446	1.23262	0.562786	-2.44171	-	-			-0.779158	0.539314	0.49472	-1.14755	-	-			-0.476544	0.330785	0.89365	-0.776612	-	-			0.5888	0.442893	0.689303	1.03131					-1.2557	0.781771	0.504565	-1.62409	-	-			1.06532	0.905358	0.264616	1.78595
P01642	Gm10881	Ig kappa chain V-V region L7 (Fragment)	Gm10881	0.0789166	0.0488177	0.979722	0.137961	-	-			-1.35004	1.10956	0.196274	-2.12538	-	-			0			0	-	-			NaN	NaN	NaN	NaN				+					-	-			-1.42897	0.92799	0.254628	-1.82357
P01644;P01645;P01646;P01647;P01648;P04946	-	Ig kappa chain V-V region HP R16.7	-					-	-							-	-			0			0	-	-			NaN	NaN	NaN	NaN				+					-	-			NaN	NaN	NaN	NaN
P01660	-	Ig kappa chain V-III region PC 3741/TEPC 111	-					-	-							-	-			0			0	-	-			NaN	NaN	NaN	NaN									-	-			NaN	NaN	NaN	NaN
P01680	-	Ig kappa chain V-IV region S107B	-					-	-			-0.908563	1.21141	0.166202	-2.22458	-	-			0			0	-	-			NaN	NaN	NaN	NaN									-	-			NaN	NaN	NaN	NaN
P01723;P01727	-	Ig lambda-1 chain V region		-2.36043	3.7444	0.312	-6.09592	-	+			-1.33889	2.35629	0.0277413	-3.56902	-	+			1.04869	1.33804	0.533615	2.24968	-	-			2.07024	2.54245	0.0713407	4.05396	+				-0.2902	0.29504	0.817535	-0.688254	-	-			1.02154	1.30936	0.131182	2.23945
P01751;P01753;P01754	Ighv1-62-3;Ighv1-72	Ig heavy chain V region B1-8/186-2	Ighv1-62-3					-	-							-	-			0			0	-	-			NaN	NaN	NaN	NaN			+						-	-			NaN	NaN	NaN	NaN
P01796;P01797;P01799;P01800;P01801;P01802;P01803;P01804	-	Ig heavy chain V-III region A4	-					-	-							-	-			0			0	-	-			NaN	NaN	NaN	NaN				+					-	-			-0.581366	0.739751	0.350422	-1.61284
P01831	Thy1	Thy-1 membrane glycoprotein	Thy1	0.24892	0.393383	0.858888	0.880586	-	-			-0.061073	0.0912915	0.900598	-0.247045	-	-			-0.381996	0.303581	0.903655	-0.704715	-	-			-0.692014	0.560522	0.599076	-1.16208					-0.443069	0.255256	0.843307	-0.618906	-	-			-0.310019	0.63496	0.41245	-1.26573
P01837	Igkc	Immunoglobulin kappa constant	Igkc	0.0452846	0.0984016	0.964897	0.263844	-	-			-0.900026	2.49417	0.0227089	-3.75088	-	+			0.510243	0.454852	0.84581	0.970671	-	-			-0.435088	0.357348	0.755039	-0.802624					-0.389783	0.31356	0.813146	-0.721288	-	-			-0.945331	2.59042	0.0145752	-3.87897		+
P01864	-	Ig gamma-2A chain C region secreted form	-					-	-			0.456836	0.182985	0.813172	0.468198	-	-			0			0	-	-			NaN	NaN	NaN	NaN									-	-			NaN	NaN	NaN	NaN
P01867	Igh-3	Ig gamma-2B chain C region	Igh-3	-0.123396	0.0733635	0.971081	-0.202512	-	-			0.738926	1.11246	0.195527	1.94947	-	-			-0.760952	0.689859	0.746965	-1.35824	-	-			0.101384	0.0418383	0.972036	0.119602					-0.0220253	0.0123008	0.986196	-0.0359929	-	-			0.86231	0.808017	0.31232	1.54984
P01869	Ighg1	Ig gamma-1 chain C region, membrane-bound form	Ighg1	-1.33846	0.857037	0.664577	-1.66932	-	-			-1.45485	0.896886	0.285144	-1.70392	-	-			2.20026	1.78183	0.414918	3.02133	-	-			2.08388	1.91058	0.128461	3.34789					0.745412	0.450751	0.721764	0.983428	-	-			-0.116385	0.0538156	0.933858	-0.152027
P01872	Ighm	Immunoglobulin heavy constant mu	Ighm					-	-			2.00821	1.74361	0.069151	2.82369	-	-			-1.06244	0.716741	0.744318	-1.39012	-	-			NaN	NaN	NaN	NaN			+		0.945769	0.391507	0.762928	0.871808	-	-			NaN	NaN	NaN	NaN
P01887	B2m	Beta-2-microglobulin	B2m	-0.408767	0.586322	0.782922	-1.19616	-	-			0.4995	0.80791	0.326765	1.5244	-	-			-0.031305	0.0321355	0.993783	-0.091408	-	-			0.876957	1.47907	0.200669	2.43382					0.468195	0.639763	0.591209	1.27315	-	-			0.908257	1.79709	0.0566054	2.84441
P01897	H2-L	H-2 class I histocompatibility antigen, L-D alpha chain	H2-L	0.616765	1.28678	0.550681	2.24208	-	-			1.74346	2.4185	0.0254005	3.74499	+	-			-0.118248	0.0780067	0.985136	-0.212098	-	-			1.00841	1.18805	0.288327	2.05106					1.62522	2.01852	0.128505	3.19439	+	-			1.12668	1.51111	0.0928861	2.4754
P01898	H2-Q10	H-2 class I histocompatibility antigen, Q10 alpha chain	H2-Q10					-	-							-	-			0			0	-	-			NaN	NaN	NaN	NaN									-	-			NaN	NaN	NaN	NaN
P01921	H2-Ab1	H-2 class II histocompatibility antigen, A-D beta chain	H2-Ab1	0.140921	0.0922024	0.966058	0.249308	-	-			-0.310464	0.21035	0.788569	-0.517444	-	-			0.524972	0.348228	0.888043	0.785925	-	-			0.0735668	0.0391099	0.974123	0.11091					0.214507	0.129671	0.918486	0.339705	-	-			-0.451402	0.313662	0.678258	-0.721482
P01942	Hba	Hemoglobin subunit alpha	Hba	0.164844	0.310803	0.898053	0.718538	-	-			-0.309358	0.509476	0.518954	-1.06568	-	-			-0.515617	0.739398	0.733612	-1.41594	-	-			-0.989798	1.83655	0.136414	-2.8952					-0.824975	1.38764	0.249586	-2.31468	-	-			-0.474198	0.961035	0.240473	-1.74186
P02463	Col4a1	Collagen alpha-1(IV) chain	Col4a1	0.448919	0.76441	0.696616	1.47108	-	-			0.539867	1.13642	0.189103	1.98181	-	-			-0.377866	0.750494	0.730272	-1.43217	-	-			-0.286903	0.455031	0.67983	-0.974553					0.162001	0.229335	0.856376	0.555388	-	-			0.090983	0.126533	0.861548	0.330473
P02468	Lamc1	Laminin subunit gamma-1	Lamc1	-0.487436	1.43284	0.508794	-2.40637	-	-			-0.0452038	0.140799	0.852218	-0.363522	-	-			-0.519324	0.990892	0.656194	-1.76992	-	-			-0.0771306	0.0816916	0.94239	-0.221804					-0.564528	1.02441	0.372508	-1.82951	-	-			0.442212	1.28471	0.137607	2.17945
P02469	Lamb1	Laminin subunit beta-1	Lamb1	-0.218399	0.793338	0.688894	-1.51413	-	-			0.157862	0.415346	0.601539	0.906131	-	-			-0.592767	1.50267	0.488367	-2.43526	-	-			-0.216509	0.414713	0.707532	-0.905025					-0.434905	1.16541	0.319574	-2.02076	-	-			0.376248	1.04092	0.208146	1.85215
P02535	Krt10	Keratin, type I cytoskeletal 10	Krt10	-0.521507	0.46014	0.82619	-0.987635	-	-			-0.351093	0.323611	0.680982	-0.740225	-	-			0.608669	0.762318	0.724118	1.44939	-	-			0.779103	0.906578	0.406071	1.66552					0.257576	0.175164	0.893717	0.440521	-	-			0.170417	0.21891	0.767653	0.533838
P02798	Mt2	Metallothionein-2	Mt2					-	-							-	-		+	0			0	-	-	+		NaN	NaN	NaN	NaN									-	-			NaN	NaN	NaN	NaN
P03888	Mtnd1	NADH-ubiquinone oxidoreductase chain 1	Mtnd1	0.338607	0.118707	0.962478	0.325895	-	-							-	-	+		0			0	-	-			NaN	NaN	NaN	NaN				+					-	-	+		NaN	NaN	NaN	NaN
P03911	Mtnd4	NADH-ubiquinone oxidoreductase chain 4	Mtnd4	-0.295104	0.221896	0.935678	-0.546033	-	-			-1.10482	1.52824	0.0971718	-2.72312	-	-			0			0	-	-			NaN	NaN	NaN	NaN				+					-	-			-0.80975	0.909062	0.263399	-1.70028
P03921	Mtnd5	NADH-ubiquinone oxidoreductase chain 5	Mtnd5					-	-							-	-			0			0	-	-			NaN	NaN	NaN	NaN									-	-			NaN	NaN	NaN	NaN
P03953	Cfd	Complement factor D	Cfd	-1.10842	0.514518	0.802109	-1.14027	-	-			-1.00006	0.882136	0.292599	-1.89377	-	-			0			0	-	-			NaN	NaN	NaN	NaN				+					-	-			0.108401	0.0353753	0.95561	0.103254
P03958	Ada	Adenosine deaminase	Ada	0.523697	0.502239	0.81266	1.05879	-	-			0.566533	0.698084	0.38618	1.3621	-	-			-0.230342	0.81454	0.703852	-1.5246	-	-			-0.187514	0.335456	0.774551	-0.762332					0.33619	0.343317	0.793489	0.776883	-	-			0.0428288	0.0727585	0.915208	0.199189
P03975	Iap	IgE-binding protein	Iap					-	-							-	-			-0.0975904	0.0953692	0.974506	-0.260968	-	-			-0.69055	0.744402	0.486644	-1.51669									-	-			-0.59295	0.899955	0.266666	-1.77696
P03987	-	Ig gamma-3 chain C region	-	0.661558	0.343202	0.885602	0.81194	-	-			1.0618	0.748718	0.360468	1.49583	-	-			0			0	-	-			NaN	NaN	NaN	NaN				+					-	-			0.400233	0.396912	0.60521	0.903766
P03995	Gfap	Glial fibrillary acidic protein	Gfap	-0.0394869	0.0865455	0.967257	-0.234509	-	-			0.66897	2.07062	0.04175	3.19704	+	-			-0.589815	0.978705	0.650833	-1.75334	-	-			0.118681	0.135648	0.917335	0.351667					0.0791553	0.086194	0.940322	0.233073	-	-			0.708467	2.26026	0.0265395	3.44335	+
P04104	Krt1	Keratin, type II cytoskeletal 1	Krt1	-0.64719	0.822395	0.686613	-1.55701	-	-			-0.628667	0.89094	0.288515	-1.64341	-	-			0.107301	0.0561218	0.991649	0.155806	-	-			0.125822	0.0607158	0.956984	0.168134					-0.521366	0.274953	0.835061	-0.646935	-	-			0.0185215	0.0271046	0.964893	0.0776551
P04117	Fabp4	Fatty acid-binding protein, adipocyte	Fabp4	-0.266802	0.383168	0.863255	-0.852591	-	-			0.205228	0.288333	0.711283	0.673005	-	-			0.0598733	0.0446616	0.992263	0.125412	-	-			0.531929	0.497045	0.64824	1.04513					0.265102	0.219774	0.860529	0.535633	-	-			0.472043	0.752034	0.343114	1.4426
P04184	Tk1	Thymidine kinase, cytosolic	Tk1					-	-							-	-			0			0	-	-			NaN	NaN	NaN	NaN									-	-			NaN	NaN	NaN	NaN
P04247	Mb	Myoglobin	Mb	1.16357	0.806593	0.68891	1.5477	-	-			-0.640681	0.317511	0.685097	-0.728752	-	-			-1.98009	1.63653	0.427839	-2.68001	-	-			-3.78434	5.40998	0.032	-11.0939		+			-2.62077	2.22302	0.105229	-3.5743	-	+			-1.80427	1.42192	0.107395	-2.39166
P04342;P04345;Q03740;Q9CXV3	Cryga;Crygd;Cryge;Crygf	Gamma-crystallin D	Cryga	-0.343704	0.272549	0.916681	-0.650032	-	-			-0.29952	1.83934	0.0589341	-3.02012	-	-			0.371973	1.29779	0.558511	2.22374	-	-			0.416156	0.367858	0.74699	0.828727					0.0724536	0.140885	0.914803	0.365806	-	-			0.0441572	0.0326805	0.957023	0.0935554
P04627	Araf	Serine/threonine-protein kinase A-Raf	Araf	-0.498509	0.28926	0.905141	-0.687768	-	-			-0.155772	0.234991	0.761084	-0.570785	-	-			-0.349028	0.744382	0.729796	-1.45315	-	-			-0.00627966	0.00297794	0.993434	-0.00887501					-0.5048	0.632728	0.596549	-1.32641	-	-			0.342749	0.282913	0.704784	0.66466
P04919	Slc4a1	Band 3 anion transport protein	Slc4a1	-0.385021	0.245089	0.929356	-0.609643	-	-			-0.211976	0.167333	0.828493	-0.429821	-	-			0			0	-	-			NaN	NaN	NaN	NaN				+					-	-			0.173047	0.126876	0.861173	0.338298
P04925	Prnp	Major prion protein	Prnp	0.593685	1.49932	0.514414	2.49583	-	-			-0.108783	0.205625	0.790919	-0.506008	-	-			-0.0975854	0.0947058	0.975094	-0.253636	-	-			-0.800041	1.07924	0.328144	-1.90443					-0.206369	0.179454	0.89213	-0.449892	-	-			-0.702455	4.25475	0.000780488	-6.33467		+
P05063	Aldoc	Fructose-bisphosphate aldolase C	Aldoc	0.329438	0.375087	0.869212	0.841973	-	-			0.233418	0.361425	0.648297	0.813111	-	-			0.902183	1.64429	0.426152	2.81455	-	-			0.806167	0.888175	0.409634	1.71867					1.1356	2.02983	0.126553	3.76567	+	-			-0.0960239	0.101613	0.88515	-0.271033
P05064	Aldoa	Fructose-bisphosphate aldolase A	Aldoa	0.377636	0.415806	0.845417	0.910703	-	-			-0.223068	0.276177	0.723515	-0.649333	-	-			-0.539862	1.09428	0.608161	-1.90882	-	-			-1.14056	2.12687	0.0974222	-3.26989		+			-0.76293	1.60035	0.19393	-2.59088	-	-			-0.600707	0.815834	0.307831	-1.53589
P05132	Prkaca	cAMP-dependent protein kinase catalytic subunit alpha	Prkaca	0.577789	0.612423	0.770882	1.25731	-	-			-0.254353	0.176697	0.819282	-0.44657	-	-			-1.35101	1.07898	0.617776	-1.94696	-	-			-2.18315	2.06572	0.10402	-3.45779		+			-1.60536	1.07426	0.347861	-2.06661	-	-			-0.832142	0.982163	0.232712	-1.77121
P05201	Got1	Aspartate aminotransferase, cytoplasmic	Got1	-0.0504065	0.0608377	0.976035	-0.168845	-	-			0.0254876	0.0514252	0.947551	0.143707	-	-			-0.154129	0.389182	0.875268	-0.857161	-	-			-0.0782288	0.102507	0.931641	-0.273207					-0.128641	0.269383	0.836744	-0.635982	-	-			0.0758999	0.106065	0.881067	0.28182
P05202	Got2	Aspartate aminotransferase, mitochondrial	Got2	0.247615	0.548603	0.791872	1.13525	-	-			0.0893774	0.195175	0.800309	0.483814	-	-			-0.549017	1.88976	0.410065	-2.91794	-	-			-0.70725	2.09806	0.0994105	-3.23256		+			-0.459639	1.10419	0.340147	-1.93829	-	-			-0.158264	0.461763	0.548658	-0.985984
P05208	Cela2a	Chymotrypsin-like elastase family member 2A	Cela2a					-	-							-	-			0			0	-	-			NaN	NaN	NaN	NaN									-	-			NaN	NaN	NaN	NaN
P05366	Saa1	Serum amyloid A-1 protein	Saa1	-0.263764	0.310416	0.898189	-0.7178	-	-			0.726312	2.04115	0.0433214	3.15895	+	-			0.628328	0.727885	0.737071	1.39903	-	-			1.6184	1.88473	0.132111	2.95723					1.35464	1.7906	0.153654	2.83606	-	-			0.990062	1.76965	0.0598952	2.80909
P05367	Saa2	Serum amyloid A-2 protein	Saa2					-	-							-	-			0			0	-	-			NaN	NaN	NaN	NaN									-	-			NaN	NaN	NaN	NaN
P05555	Itgam	Integrin alpha-M	Itgam	-0.475056	0.457993	0.827712	-1.0614	-	-			2.39028	3.94321	0.0041875	6.98824	+	-			-0.877892	0.923335	0.658518	-1.70345	-	-			1.98746	1.34556	0.240242	2.52262					1.51239	1.09984	0.340325	2.10918	-	-			2.86534	3.77213	0.00306173	6.60222	+
P05784	Krt18	Keratin, type I cytoskeletal 18	Krt18	-0.458572	1.29827	0.552534	-2.2244	-	-			-0.913078	2.63279	0.0193103	-3.93569	-	+			0.214997	0.234292	0.926272	0.564135	-	-			-0.239514	0.256752	0.828945	-0.61092					-0.698081	1.04592	0.362012	-1.859	-	-			-0.454486	0.975603	0.234239	-1.76211
P05977	Myl1	Myosin light chain 1/3, skeletal muscle isoform	Myl1	0.768736	0.43175	0.84289	0.943543	-	-			-0.640502	0.384112	0.629097	-0.850944	-	-			-1.60115	1.21373	0.589848	-2.08534	-	-			-3.0104	2.24432	0.0886053	-3.60569		+			-2.24165	1.77117	0.157448	-2.8607	-	-			-1.40924	0.9589	0.24145	-1.75423
P06151	Ldha	L-lactate dehydrogenase A chain	Ldha	-0.249149	0.446825	0.835958	-0.964758	-	-			-0.205341	0.865749	0.299335	-1.6076	-	-			-0.346098	0.782105	0.712627	-1.47805	-	-			-0.302302	0.431319	0.692088	-0.933887					-0.55144	1.24156	0.293628	-2.12233	-	-			0.0437838	0.0688339	0.918741	0.189142
P06339	H2-T23	H-2 class I histocompatibility antigen, D-37 alpha chain	H2-T23					-	-							-	-			0			0	-	-			NaN	NaN	NaN	NaN									-	-			NaN	NaN	NaN	NaN
P06344	-	H-2 class II histocompatibility antigen, A-U beta chain	-	0.386879	0.371029	0.872117	0.834546	-	-			0.240256	0.194142	0.801843	0.482955	-	-			0.560344	0.609724	0.766014	1.22647	-	-			0.413733	0.448975	0.685264	0.968465					0.8006	0.870399	0.456322	1.64312	-	-			-0.14661	0.127852	0.860427	-0.333557
P06537	Nr3c1	Glucocorticoid receptor	Nr3c1	-0.765842	0.830495	0.683192	-1.60237	-	-			-0.487343	0.573719	0.468082	-1.18368	-	-			0.0427697	0.0261548	0.995243	0.0756517	-	-			0.321267	0.197187	0.8691	0.496043					-0.444573	0.289197	0.822156	-0.702335	-	-			0.278505	0.281819	0.705175	0.660354
P06683	C9	Complement component C9	C9	-1.2573	0.383234	0.863883	-0.911113	-	-			-0.231351	0.0996282	0.89015	-0.268635	-	-			0			0	-	-			NaN	NaN	NaN	NaN				+					-	-			1.02597	0.383008	0.61679	0.861587
P06684	C5	Complement C5	C5					-	-							-	-			0			0	-	-			NaN	NaN	NaN	NaN									-	-			NaN	NaN	NaN	NaN
P06728	Apoa4	Apolipoprotein A-IV	Apoa4	-0.0906544	0.127567	0.96131	-0.33373	-	-			-0.0844417	0.16562	0.829293	-0.419486	-	-			-0.817189	0.742471	0.731242	-1.42844	-	-			-0.810966	0.627315	0.557282	-1.26116					-0.901631	0.79908	0.494888	-1.52263	-	-			0.00622636	0.00694989	0.98862	0.0203551
P06745	Gpi	Glucose-6-phosphate isomerase	Gpi	0.0933285	0.167943	0.951281	0.42577	-	-			0.0986164	0.30888	0.694611	0.712414	-	-			-0.20088	0.783197	0.713545	-1.47962	-	-			-0.195576	0.435529	0.692048	-0.941154					-0.102264	0.290803	0.820466	-0.677783	-	-			0.00532359	0.00915913	0.985851	0.0267591
P06800	Ptprc	Receptor-type tyrosine-protein phosphatase C	Ptprc	0.425712	0.271919	0.917084	0.666404	-	-			1.84578	2.84808	0.0162152	4.53364	+	-			-0.0833462	0.0622137	0.990333	-0.172034	-	-			1.33673	0.916695	0.400779	1.76371					1.76243	1.55955	0.20351	2.68826	-	-			1.42009	1.81613	0.0551337	3.0733
P06802	Enpp1	Ectonucleotide pyrophosphatase/phosphodiesterase family member 1	Enpp1	0.75234	0.876954	0.651391	1.70091	-	-			-0.121311	0.122003	0.865424	-0.324437	-	-			0			0	-	-			NaN	NaN	NaN	NaN				+					-	-			-0.873667	1.34554	0.122247	-2.2885
P06837	Gap43	Neuromodulin	Gap43	-0.289288	0.25309	0.927858	-0.619514	-	-			-0.615898	0.398886	0.61548	-0.897776	-	-			0.978327	0.846425	0.684882	1.62685	-	-			0.651705	0.823857	0.4394	1.61651					0.362429	0.373154	0.774928	0.849901	-	-			-0.326595	0.19266	0.793532	-0.486148
P06909	Cfh	Complement factor H	Cfh	0.14812	0.158146	0.953461	0.40896	-	-			2.30326	3.31025	0.00888235	5.30671	+	-			-0.694666	0.521174	0.807689	-1.08488	-	-			1.46049	1.1606	0.30153	2.06351					1.60859	1.18402	0.313994	2.13325	-	-			2.15513	3.1909	0.00562581	4.87755	+
P07091	S100a4	Protein S100-A4	S100a4	-0.815141	1.32834	0.547012	-2.26519	-	-			0.197351	0.330835	0.674655	0.753735	-	-			-0.0243598	0.0180531	0.997015	-0.0521295	-	-			0.988155	1.00852	0.354091	1.80764					0.172991	0.132038	0.919199	0.343307	-	-			1.01251	1.92246	0.0457431	3.00583
P07146	Prss2	Anionic trypsin-2	Prss2					-	-							-	-			-1.59559	0.386507	0.877607	-0.874842	-	-			NaN	NaN	NaN	NaN			+						-	-			NaN	NaN	NaN	NaN
P07214	Sparc	SPARC	Sparc	0.075242	0.0847818	0.967836	0.232695	-	-			0.633604	1.01407	0.231618	1.88062	-	-			-0.611073	0.576882	0.778464	-1.18102	-	-			-0.0526803	0.0336276	0.977987	-0.0961719					0.0225311	0.010442	0.987321	0.0310417	-	-			0.558371	1.01746	0.217199	1.81995
P07309	Ttr	Transthyretin	Ttr	-0.0173696	0.0174301	0.990974	-0.0507148	-	-			-0.336081	0.57618	0.466197	-1.17989	-	-			-0.305513	0.438735	0.850306	-0.955807	-	-			-0.624191	0.841425	0.43131	-1.61917					-0.641594	0.929801	0.423937	-1.78436	-	-			-0.318716	0.506448	0.511135	-1.06068
P07310	Ckm	Creatine kinase M-type	Ckm	-0.284291	0.125279	0.962125	-0.328359	-	-			-0.818785	0.720985	0.374551	-1.39646	-	-			-1.8115	2.03497	0.443862	-3.09787	-	+			-2.346	1.7765	0.149199	-2.81791					-2.63029	2.79257	0.0986341	-4.15155	-	+			-0.53451	0.287046	0.700464	-0.670512
P07356	Anxa2	Annexin A2	Anxa2	-0.480205	0.821428	0.687028	-1.55559	-	-			0.0172256	0.041288	0.957105	0.116559	-	-			0.0416045	0.105596	0.97503	0.280115	-	-			0.539058	1.04116	0.343855	1.85249					0.05883	0.138195	0.917086	0.357539	-	-			0.497458	0.977665	0.23361	1.76497
P07607	Tyms	Thymidylate synthase	Tyms	0.932259	1.28348	0.550757	2.33716	-	-			0.457747	0.524041	0.507457	1.10166	-	-			0.500044	0.605736	0.766811	1.22023	-	-			0.0254995	0.0205654	0.984207	0.0596343					0.957791	1.32764	0.267281	2.34526	-	-			-0.474514	0.538911	0.484825	-1.11942
P07724	Alb	Serum albumin	Alb	-0.812519	1.82508	0.477176	-2.93316	-	-			-1.26026	4.48378	0.00328571	-6.72094	-	+			-0.413103	0.553571	0.790869	-1.13254	-	-			-0.860857	1.14361	0.308843	-1.99149					-1.67336	3.05515	0.106261	-4.51395	-	+			-0.447757	0.818347	0.306856	-1.53952
P07742	Rrm1	Ribonucleoside-diphosphate reductase large subunit	Rrm1	0.605898	0.648531	0.750112	1.33187	-	-			1.2566	3.92344	0.00418462	6.44181	+	-			-0.487645	0.900582	0.67202	-1.67075	-	-			0.16308	0.12576	0.921264	0.331776					0.768956	1.08168	0.344686	2.02225	-	-			0.650709	1.0557	0.204705	1.89069
P07744	Krt4	Keratin, type II cytoskeletal 4	Krt4	-1.31062	1.67487	0.47857	-2.73144	-	-			-0.117404	0.0579316	0.939608	-0.160858	-	-			0.796251	0.526651	0.802851	1.09383	-	-			1.98947	2.72146	0.063697	4.17623	+				0.678846	0.666713	0.576512	1.32259	-	-			1.19322	0.91993	0.259214	1.68433
P07758	Serpina1a	Alpha-1-antitrypsin 1-1	Serpina1a	0.128971	0.218314	0.935326	0.534157	-	-			-0.738383	1.03193	0.225864	-1.83983	-	-			0			0	-	-			NaN	NaN	NaN	NaN				+					-	-			-0.867366	1.39675	0.111788	-2.32659
P07759	Serpina3k	Serine protease inhibitor A3K	Serpina3k	-0.0636392	0.0966374	0.964523	-0.261246	-	-			-0.932345	0.56485	0.474766	-1.16918	-	-			0			0	-	-			NaN	NaN	NaN	NaN				+					-	-			-0.868693	0.71345	0.364026	-1.38519
P07901	Hsp90aa1	Heat shock protein HSP 90-alpha	Hsp90aa1	-0.0292699	0.0765054	0.970647	-0.209211	-	-			0.0135985	0.0379605	0.959027	0.107531	-	-			0.0562107	0.175635	0.954725	0.440554	-	-			0.0991043	0.304918	0.794722	0.704872					0.0698092	0.193383	0.882321	0.479978	-	-			0.0428762	0.136983	0.848735	0.354748
P08030	Aprt	Adenine phosphoribosyltransferase	Aprt	-0.902098	1.22079	0.565702	-2.11878	-	-			0.235332	0.737481	0.366563	1.42104	-	-			-0.100309	0.128785	0.969322	-0.335734	-	-			1.0371	1.17473	0.292869	2.05562					0.135022	0.170039	0.895777	0.430415	-	-			1.13744	1.80181	0.0562788	2.85049
P08032	Spta1	Spectrin alpha chain, erythrocytic 1	Spta1					-	-			-0.20324	0.132307	0.859906	-0.35456	-	-			0			0	-	-			NaN	NaN	NaN	NaN									-	-			NaN	NaN	NaN	NaN
P08071	Ltf	Lactotransferrin	Ltf	0.218206	0.220376	0.936074	0.540397	-	-			1.96497	3.57106	0.00616327	5.48198	+	-			-0.470948	0.466737	0.840843	-0.990676	-	-			1.27582	1.48097	0.200556	2.43629					1.49402	1.61198	0.191847	2.64708	-	-			1.74677	3.44958	0.00419672	5.07968	+
P08074	Cbr2	Carbonyl reductase [NADPH] 2	Cbr2	-0.162887	0.338163	0.888839	-0.770137	-	-			0.66242	2.60509	0.0197228	3.89858	+	-			-0.200306	0.320508	0.89666	-0.732257	-	-			0.625019	1.15251	0.305403	2.00345					0.462113	0.816772	0.483628	1.53724	-	-			0.825319	2.94464	0.00828283	4.36018	+
P08101	Fcgr2	Low affinity immunoglobulin gamma Fc region receptor II	Fcgr2					-	-	+		1.67777	4.3673	0.00282353	8.01913	+	-			-0.165077	0.14214	0.966022	-0.367541	-	-			NaN	NaN	NaN	NaN			+		1.51269	1.07372	0.347446	2.06569	-	-			NaN	NaN	NaN	NaN
P08113	Hsp90b1	Endoplasmin	Hsp90b1	0.0326233	0.10377	0.962726	0.276944	-	-			0.330646	1.8544	0.0578917	2.91818	-	-			-0.151309	0.381414	0.878463	-0.843374	-	-			0.146683	0.336052	0.774059	0.763439					0.179337	0.448211	0.722449	0.962922	-	-			0.297997	1.47441	0.0974237	2.42777
P08121	Col3a1	Collagen alpha-1(III) chain	Col3a1	-1.68325	2.04677	0.405507	-3.23275	-	+			-0.415337	0.9966	0.237976	-1.79119	-	-			-0.819558	1.70141	0.414834	-2.68404	-	-			0.448352	0.377678	0.740077	0.839419					-1.23489	2.44739	0.103095	-3.68898	-	+			1.26791	1.65483	0.0731765	2.66119
P08207	S100a10	Protein S100-A10	S100a10	-0.216311	0.217591	0.935598	-0.544214	-	-			-0.690853	0.950451	0.25798	-1.81685	-	-			0			0	-	-			NaN	NaN	NaN	NaN				+					-	-			-0.47452	0.700328	0.371649	-1.38514
P08226	Apoe	Apolipoprotein E	Apoe	0.39222	0.522997	0.793526	1.09325	-	-			1.68906	3.45629	0.00727586	5.08955	+	-			-0.795642	1.82158	0.411387	-2.83339	-	-			0.501205	0.89915	0.409156	1.65503					0.893421	1.44873	0.229437	2.39438	-	-			1.29685	3.51926	0.00407339	5.18263	+
P08228	Sod1	Superoxide dismutase [Cu-Zn]	Sod1	0.205732	0.199198	0.943562	0.493784	-	-			-0.771758	1.05234	0.218479	-1.86777	-	-			0.0358519	0.0243887	0.995544	0.0699437	-	-			-0.941671	0.973984	0.371421	-1.75986					-0.735906	0.810508	0.486793	-1.52817	-	-			-0.977515	1.19482	0.160429	-2.06012
P08249	Mdh2	Malate dehydrogenase, mitochondrial	Mdh2	0.0026296	0.00440944	0.993473	0.012981	-	-			-0.348897	1.47466	0.106349	-2.42809	-	-			-0.446632	0.567407	0.786999	-1.15451	-	-			-0.79815	1.02252	0.351109	-1.82691					-0.795529	1.08945	0.343509	-1.91831	-	-			-0.351536	0.979847	0.232775	-1.768
P08508	Fcgr3	Low affinity immunoglobulin gamma Fc region receptor III	Fcgr3					-	-							-	-			0			0	-	-			NaN	NaN	NaN	NaN									-	-			NaN	NaN	NaN	NaN
P08551	Nefl	Neurofilament light polypeptide	Nefl	-0.710879	2.0046	0.4144	-3.17551	-	+			-0.610719	1.07988	0.206527	-1.90531	-	-			-0.433874	0.648819	0.761241	-1.28075	-	-			-0.333717	0.603685	0.573081	-1.21701					-1.04459	2.46433	0.104691	-3.71137	-	+			0.100154	0.121554	0.866333	0.318774
P08553	Nefm	Neurofilament medium polypeptide	Nefm	-1.06672	2.08883	0.409508	-3.28999	-	+			-0.24749	0.517431	0.510704	-1.07875	-	-			-0.807109	1.52422	0.477848	-2.49241	-	-			0.0120999	0.0101226	0.987184	0.0296091					-1.0546	2.31117	0.0997265	-3.59546	-	+			0.819224	1.41871	0.107798	2.35525
P08556	Nras	GTPase NRas	Nras	0.143173	0.20813	0.939123	0.523706	-	-			0.209435	0.374892	0.636882	0.841617	-	-			-0.768204	1.69796	0.416316	-2.89494	-	-			-0.701901	1.2781	0.259738	-2.52718					-0.558769	1.21246	0.300852	-2.40408	-	-			0.0662849	0.0922809	0.893732	0.249503
P08607	C4bpa	C4b-binding protein	C4bpa					-	-							-	-			-0.483607	0.164745	0.957559	-0.431153	-	-			NaN	NaN	NaN	NaN			+						-	-			NaN	NaN	NaN	NaN
P08730	Krt13	Keratin, type I cytoskeletal 13	Krt13	-2.62372	2.08237	0.401778	-3.48387	-	+			0.0241438	0.00925399	0.986335	0.0270334	-	-			0.0975647	0.027153	0.995305	0.0777898	-	-			2.74543	1.05391	0.336962	1.94014					0.121709	0.0358444	0.974284	0.101992	-	-			2.64786	1.52947	0.0901174	2.58306
P08752	Gnai2	Guanine nucleotide-binding protein G(i) subunit alpha-2	Gnai2	-0.284366	0.180329	0.948252	-0.456466	-	-			0.222945	0.424621	0.594796	0.937029	-	-			0.021753	0.0111312	1	0.0328709	-	-			0.529051	0.226986	0.844829	0.559992					0.244698	0.110289	0.928256	0.30072	-	-			0.507317	0.460437	0.550349	0.988144
P08775	Polr2a	DNA-directed RNA polymerase II subunit RPB1	Polr2a	-0.084777	0.0959424	0.965227	-0.258569	-	-			0.378168	1.31254	0.140465	2.24377	-	-			-0.42636	0.916922	0.66213	-1.6801	-	-			0.0366004	0.0347616	0.976846	0.0990216					-0.0481915	0.0559728	0.957841	-0.156521	-	-			0.462945	0.939268	0.249049	1.71146
P09036	Spink1	Serine protease inhibitor Kazal-type 1	Spink1	-0.335002	0.703424	0.723057	-1.40389	-	-			0.553232	0.50222	0.525424	1.05876	-	-			-0.576262	0.384393	0.877254	-0.851446	-	-			0.311948	0.202533	0.865121	0.502637					-0.0230299	0.0127861	0.986167	-0.0373928	-	-			0.888223	0.910327	0.263009	1.68478
P09055	Itgb1	Integrin beta-1	Itgb1	-0.109868	0.211756	0.938519	-0.520406	-	-			0.244426	0.780706	0.341137	1.48476	-	-			-0.43247	1.91414	0.419106	-2.94816	-	-			-0.0781832	0.1624	0.898315	-0.412332					-0.188045	0.526224	0.672521	-1.09313	-	-			0.354302	1.10316	0.187687	1.9369
P09103	P4hb	Protein disulfide-isomerase	P4hb	0.0424325	0.121139	0.961648	0.318592	-	-			0.270405	0.958681	0.254968	1.73858	-	-			-0.0499014	0.148645	0.96395	-0.380592	-	-			0.178056	0.924055	0.395173	1.69013					0.220503	1.31435	0.268524	2.21853	-	-			0.227969	0.743605	0.347581	1.43013
P09242	Alpl	Alkaline phosphatase, tissue-nonspecific isozyme	Alpl					-	-							-	-			0			0	-	-			NaN	NaN	NaN	NaN									-	-			NaN	NaN	NaN	NaN
P09405	Ncl	Nucleolin	Ncl	-0.4981	0.798399	0.689006	-1.52163	-	-			0.585439	2.55114	0.0212393	3.82657	+	-			-0.121068	0.283353	0.909368	-0.661532	-	-			0.962464	1.8771	0.132372	2.94741					0.464371	1.8001	0.15343	2.84829	-	-			1.08354	2.20292	0.0292926	3.36864	+
P09411	Pgk1	Phosphoglycerate kinase 1	Pgk1	0.102818	0.1443	0.957299	0.372494	-	-			0.171627	0.466464	0.558225	0.993938	-	-			-0.517837	1.71167	0.421214	-2.69682	-	-			-0.449062	0.865418	0.416906	-1.60713					-0.34621	0.733329	0.536351	-1.41487	-	-			0.0687951	0.119513	0.867833	0.313955
P09470	Ace	Angiotensin-converting enzyme	Ace	0.0615654	0.0461208	0.979445	0.13069	-	-			-0.130086	0.159561	0.835137	-0.408393	-	-			0.142706	0.145661	0.965295	0.376797	-	-			-0.0489601	0.0325899	0.978177	-0.0936301					0.0126194	0.00877117	0.98837	0.0258551	-	-			-0.19167	0.21604	0.770103	-0.531289
P09528	Fth1	Ferritin heavy chain	Fth1	0.410422	0.427907	0.83982	0.93192	-	-			-0.298609	0.433168	0.589979	-0.937083	-	-			-0.305635	0.348095	0.887944	-0.783279	-	-			-1.01465	1.19627	0.287107	-2.06205					-0.604245	0.665407	0.577073	-1.31252	-	-			-0.709024	1.11545	0.184173	-1.95352
P09541	Myl4	Myosin light chain 4	Myl4	-0.364554	0.180104	0.94846	-0.454062	-	-			-0.907919	0.613729	0.442299	-1.23975	-	-			-1.13158	0.634635	0.762131	-1.28184	-	-			-1.67496	0.910629	0.402951	-1.72479					-2.0395	1.24697	0.292927	-2.18589	-	-			-0.543394	0.315446	0.675969	-0.730483
P09542	Myl3	Myosin light chain 3	Myl3	-0.381645	0.225773	0.933098	-0.549677	-	-			-1.01657	1.02302	0.228363	-1.82759	-	-			-1.60541	1.56055	0.452219	-2.50802	-	-			-2.24035	1.8692	0.133793	-2.93723					-2.62199	2.10325	0.114163	-3.23928	-	+			-0.634917	0.661769	0.395507	-1.30696
P09581	Csf1r	Macrophage colony-stimulating factor 1 receptor	Csf1r					-	-							-	-		+	0			0	-	-	+		NaN	NaN	NaN	NaN									-	-			NaN	NaN	NaN	NaN
P09602	Hmgn2	Non-histone chromosomal protein HMG-17	Hmgn2	-0.72645	0.540617	0.789149	-1.14979	-	-			0.068778	0.0552234	0.943193	0.156734	-	-			-0.152193	0.115775	0.972385	-0.311455	-	-			0.643015	0.441302	0.68838	0.97511					-0.0834146	0.0467096	0.965918	-0.133677	-	-			0.79524	0.748096	0.345073	1.49483
P09803	Cdh1	Cadherin-1	Cdh1	-0.255963	0.816029	0.688136	-1.54765	-	-			-0.481646	1.13356	0.189801	-1.97795	-	-			0.309757	0.51053	0.813624	1.06312	-	-			0.0840738	0.127194	0.921236	0.332018					-0.17189	0.287632	0.823059	-0.671647	-	-			-0.225698	0.433594	0.573986	-0.937817
P09925	Surf1	Surfeit locus protein 1	Surf1	-0.144208	0.243709	0.929732	-0.588689	-	-			-0.539566	1.52464	0.0977814	-2.52985	-	-			0.235836	0.685214	0.748513	1.36158	-	-			-0.159516	0.331708	0.775015	-0.765601					-0.303731	0.460273	0.715329	-1.00912	-	-			-0.395338	1.70021	0.0683731	-2.71967
P09926	Surf2	Surfeit locus protein 2	Surf2					-	-							-	-			0			0	-	-			NaN	NaN	NaN	NaN									-	-			NaN	NaN	NaN	NaN
P0C0A3	Chmp6	Charged multivesicular body protein 6	Chmp6					-	-			0.236732	0.12646	0.863869	0.333433	-	-			0			0	-	-			NaN	NaN	NaN	NaN									-	-			NaN	NaN	NaN	NaN
P0C5K1	Sbk2	Serine/threonine-protein kinase SBK2	Sbk2	0.379867	0.195558	0.943216	0.509157	-	-							-	-			0			0	-	-			NaN	NaN	NaN	NaN				+					-	-			NaN	NaN	NaN	NaN
P0C605	Prkg1	cGMP-dependent protein kinase 1	Prkg1	-0.00809892	0.014884	0.992188	-0.0434275	-	-			0.246283	0.690202	0.390512	1.35876	-	-			-0.546205	1.69053	0.412667	-2.80953	-	-			-0.291817	0.742468	0.487783	-1.46555					-0.299922	0.690143	0.563931	-1.40047	-	-			0.254369	0.799243	0.316762	1.51181
P0C7T6	Atxn1l	Ataxin-1-like	Atxn1l					-	-			0.579442	1.23514	0.159377	2.62991	-	-			-0.199519	0.2296	0.92641	-0.585934	-	-			NaN	NaN	NaN	NaN			+		0.379924	0.507428	0.682939	1.15919	-	-			NaN	NaN	NaN	NaN
P0CG14	Chtf8	Chromosome transmission fidelity protein 8 homolog isoform 2	Chtf8	-0.042541	0.0206036	0.989088	-0.0610741	-	-			0.132534	0.178568	0.818502	0.450689	-	-			0.142519	0.155859	0.960384	0.400034	-	-			0.317574	0.156641	0.903481	0.412298					0.275053	0.214012	0.863356	0.53648	-	-			0.175071	0.138968	0.846395	0.362791
P0CL69	Znf703	Zinc finger protein 703	Znf703					-	-							-	-			0			0	-	-			NaN	NaN	NaN	NaN									-	-			NaN	NaN	NaN	NaN
P0CW02	Ly6c1	Lymphocyte antigen 6C1	Ly6c1					-	-			1.27074	2.58056	0.0202428	5.54152	+	-			0			0	-	-			NaN	NaN	NaN	NaN									-	-			NaN	NaN	NaN	NaN
P0DN34	Ndufb1	NADH dehydrogenase [ubiquinone] 1 beta subcomplex subunit 1	Ndufb1	1.32465	1.21311	0.566432	2.138	-	-			0.258212	0.173049	0.822765	0.437062	-	-			-0.490839	0.43318	0.853955	-0.952305	-	-			-1.5573	1.7169	0.15678	-3.02717					-0.232627	0.110189	0.927957	-0.297784	-	-			-1.06648	1.45276	0.101113	-2.39961
P0DOV1	Mnda	Interferon-activable protein 205-B	Mnda					-	-							-	-		+	0			0	-	-	+		NaN	NaN	NaN	NaN									-	-			NaN	NaN	NaN	NaN
P0DOV2	Ifi204	Interferon-activable protein 204	Ifi204					-	-	+		1.16082	5.00116	0.00153846	8.15276	+	-			-0.63818	1.35713	0.524199	-2.27473	-	-			NaN	NaN	NaN	NaN			+		0.52264	0.906687	0.439501	1.69678	-	-			NaN	NaN	NaN	NaN
P0DP26;P0DP27;P0DP28	Calm1;Calm2;Calm3	Calmodulin-1	Calm1	-0.501469	0.48143	0.819869	-1.02383	-	-			-0.890527	0.880899	0.292777	-1.62917	-	-			0.978544	1.21649	0.590363	2.06947	-	-			0.589465	0.749117	0.483194	1.43829					0.0880171	0.0618528	0.952084	0.171095	-	-			-0.389078	0.39226	0.609309	-0.865462
P10126	Eef1a1	Elongation factor 1-alpha 1	Eef1a1	0.713246	1.97809	0.407407	3.13959	-	-			0.409245	2.17246	0.0350942	3.32904	+	-			-0.169471	0.93747	0.65619	-1.69685	-	-			-0.473451	1.4224	0.214307	-2.36006					0.239774	1.13534	0.32629	1.98035	-	-			-0.304022	0.79597	0.318606	-1.50705
P10493	Nid1	Nidogen-1	Nid1	0.0519625	0.160501	0.952258	0.409181	-	-			0.101674	0.257228	0.742219	0.61187	-	-			-0.218986	0.440401	0.85034	-0.946134	-	-			-0.169266	0.335404	0.774049	-0.762236					-0.117311	0.228963	0.856512	-0.554623	-	-			0.0497051	0.104094	0.883183	0.277055
P10518	Alad	Delta-aminolevulinic acid dehydratase	Alad	0.0190471	0.0193884	0.989307	0.0561371	-	-			0.184591	0.340661	0.668329	0.771978	-	-			-0.278097	0.617372	0.76572	-1.2455	-	-			-0.112557	0.125052	0.920613	-0.328832					-0.0935061	0.13492	0.917683	-0.351973	-	-			0.165555	0.228581	0.75878	0.553837
P10605	Ctsb	Cathepsin B	Ctsb	-0.0402428	0.105067	0.963777	-0.280092	-	-			0.311696	1.36462	0.129303	2.28455	-	-			0.218823	0.298258	0.906524	0.692133	-	-			0.570783	0.899153	0.409524	1.66869					0.530519	0.872458	0.457188	1.6301	-	-			0.351945	1.22812	0.151736	2.10449
P10630	Eif4a2	Eukaryotic initiation factor 4A-II	Eif4a2	-0.141633	0.211344	0.937631	-0.519538	-	-			-0.422639	1.3394	0.135144	-2.25146	-	-			-0.408284	0.596183	0.772461	-1.1997	-	-			-0.68929	0.931202	0.393113	-1.70016					-0.830923	1.196	0.307279	-2.06169	-	-			-0.281004	0.762028	0.337211	-1.45734
P10637	Mapt	Microtubule-associated protein tau	Mapt					-	-			-0.0209348	0.0213804	0.975627	-0.0616313	-	-			-0.628138	0.775361	0.717895	-1.517	-	-			NaN	NaN	NaN	NaN			+		-0.649073	0.72348	0.542285	-1.4549	-	-			NaN	NaN	NaN	NaN
P10639	Txn	Thioredoxin	Txn	-0.966804	1.51065	0.516558	-2.51106	-	-			-0.95358	2.00165	0.0465285	-3.10793	-	+			0.548296	0.577526	0.778217	1.17048	-	-			0.561517	0.495224	0.647773	1.04211					-0.405284	0.391853	0.763026	-0.864739	-	-			0.0132028	0.0111564	0.982874	0.0325218
P10649	Gstm1	Glutathione S-transferase Mu 1	Gstm1	0.0784718	0.14767	0.956996	0.38019	-	-			-0.686693	2.24183	0.0318442	-3.41931	-	+			-0.14856	0.338755	0.891272	-0.766138	-	-			-0.913697	3.09137	0.0485714	-4.56478		+			-0.835253	2.7348	0.0951667	-4.07312	-	+			-0.765141	2.61155	0.0142116	-3.90723		+
P10711	Tcea1	Transcription elongation factor A protein 1	Tcea1	-0.723823	1.30691	0.55	-2.23613	-	-			0.114876	0.388084	0.62695	0.858031	-	-			0.0324604	0.0587164	0.990821	0.162912	-	-			0.871166	1.43619	0.210058	2.41089					0.147337	0.308105	0.813008	0.713385	-	-			0.838693	1.73382	0.0638938	2.76297
P10833	Rras	Ras-related protein R-Ras	Rras	0.181919	0.167787	0.950824	0.425425	-	-			-0.188036	0.367432	0.644193	-0.820947	-	-			-0.470378	0.570923	0.782506	-1.1652	-	-			-0.840317	0.783949	0.457346	-1.5002					-0.658415	0.770589	0.511112	-1.48031	-	-			-0.36995	0.443107	0.565845	-0.954183
P10854	Hist1h2bm	Histone H2B type 1-M	Hist1h2bm	-0.00319385	0.00433432	0.993414	-0.012761	-	-			-0.141839	0.235907	0.760386	-0.568847	-	-			0.182338	0.226805	0.926505	0.548824	-	-			0.0436813	0.0446024	0.969236	0.125494					0.0404993	0.0380709	0.971657	0.107832	-	-			-0.138647	0.289036	0.698624	-0.674366
P10922	H1f0	Histone H1.0	H1f0	-0.585457	1.76098	0.480833	-2.84701	-	-			-0.961678	3.81423	0.00484507	-5.62968	-	+			0.307507	0.748774	0.730173	1.42966	-	-			-0.0687045	0.104381	0.933508	-0.277749					-0.654171	2.19881	0.107178	-3.36329	-	+			-0.376205	0.889409	0.272201	-1.64124
P11031	Sub1	Activated RNA polymerase II transcriptional coactivator p15	Sub1	-1.5204	1.79577	0.488556	-2.89375	-	-			-0.119613	0.139598	0.853357	-0.360766	-	-			0.123198	0.0862806	0.981036	0.232824	-	-			1.52398	1.34725	0.239709	2.26177					0.00358491	0.00230542	0.99106	0.00678788	-	-			1.40079	1.62593	0.07719	2.6239
P11087	Col1a1	Collagen alpha-1(I) chain	Col1a1	-1.42115	2.31234	0.4495	-3.59708	-	+			-0.745689	1.70354	0.0733184	-2.72396	-	-			-0.741184	1.49281	0.497455	-2.42283	-	-			-0.0656805	0.0578027	0.959658	-0.16052					-1.48687	4.01853	0.0592	-5.95072	-	+			0.675476	0.855105	0.288978	1.59239
P11088	Flg	Filaggrin (Fragment)	Flg	-0.152244	0.04408	0.980211	-0.124725	-	-			0.422743	0.209943	0.789013	0.515099	-	-			0.728462	0.835736	0.685085	1.59146	-	-			1.30343	0.588355	0.582774	1.23117					1.15121	0.488016	0.698075	1.04844	-	-			0.575	0.315474	0.676131	0.727433
P11152	Lpl	Lipoprotein lipase	Lpl					-	-							-	-			0			0	-	-			NaN	NaN	NaN	NaN									-	-			NaN	NaN	NaN	NaN
P11157	Rrm2	Ribonucleoside-diphosphate reductase subunit M2	Rrm2					-	-							-	-		+	0			0	-	-	+		NaN	NaN	NaN	NaN									-	-			NaN	NaN	NaN	NaN
P11247	Mpo	Myeloperoxidase	Mpo					-	-							-	-			-0.817343	0.693439	0.74525	-1.34797	-	-			NaN	NaN	NaN	NaN			+						-	-			NaN	NaN	NaN	NaN
P11352	Gpx1	Glutathione peroxidase 1	Gpx1	-0.482021	1.62761	0.472977	-2.66805	-	-			-0.538164	1.46795	0.1076	-2.41938	-	-			0.22518	0.292996	0.908218	0.682015	-	-			0.169033	0.214555	0.855516	0.526286					-0.312985	0.388943	0.763851	-0.862972	-	-			-0.0561287	0.135493	0.850438	-0.35131
P11438	Lamp1	Lysosome-associated membrane glycoprotein 1	Lamp1	0.680213	1.04539	0.596516	1.96558	-	-			0.894135	1.48526	0.104812	2.65477	-	-			0.303325	0.292889	0.908061	0.686891	-	-			0.517266	0.559691	0.6	1.16072					1.19746	1.01265	0.377963	1.9642	-	-			0.213916	0.341116	0.652891	0.775637
P11440	Cdk1	Cyclin-dependent kinase 1	Cdk1					-	-							-	-			-0.728055	0.873677	0.682403	-1.63187	-	-			-0.37124	0.194948	0.869602	-0.488446									-	-			0.356803	0.322636	0.670605	0.741
P11499	Hsp90ab1	Heat shock protein HSP 90-beta	Hsp90ab1	0.0464532	0.108373	0.963891	0.288091	-	-			0.266707	1.00218	0.235932	1.7989	-	-			-0.0205007	0.0375503	0.992135	-0.106211	-	-			0.199757	0.44203	0.689152	0.952335					0.246206	0.560086	0.644266	1.14788	-	-			0.220271	0.831523	0.300904	1.55854
P11531	Dmd	Dystrophin	Dmd	0.0332127	0.0712393	0.969615	0.195768	-	-			-0.198355	0.527513	0.504621	-1.09523	-	-			-0.529924	1.62972	0.430795	-2.59462	-	-			-0.761497	2.50874	0.0730722	-3.7702		+			-0.728279	2.98663	0.105037	-4.41839	-	+			-0.231568	0.514978	0.503141	-1.07472
P11589	Mup2	Major urinary protein 2	Mup2	-0.308158	0.194713	0.943036	-0.484182	-	-			-2.25805	1.50944	0.100671	-2.69318	-	-			0			0	-	-			NaN	NaN	NaN	NaN				+					-	-			-1.9499	2.10076	0.0347535	-3.67331		+
P11627	L1cam	Neural cell adhesion molecule L1	L1cam	-0.607451	0.639813	0.755612	-1.28076	-	-			-0.0191437	0.0282028	0.96875	-0.0807074	-	-			-0.113276	0.179489	0.953954	-0.449969	-	-			0.47505	0.457639	0.677225	0.983352					-0.13242	0.203144	0.873936	-0.50219	-	-			0.58831	0.679306	0.3852	1.33369
P11679	Krt8	Keratin, type II cytoskeletal 8	Krt8	-0.175612	0.347121	0.883824	-0.78678	-	-			-0.826127	2.22513	0.0323729	-3.39756	-	+			0.492456	0.736111	0.736327	1.41112	-	-			-0.15806	0.176645	0.884219	-0.443761					-0.333671	0.458284	0.715613	-0.980083	-	-			-0.650545	1.49722	0.0948589	-2.45739
P11725	Otc	Ornithine carbamoyltransferase, mitochondrial	Otc	0.73473	1.04906	0.596819	1.90397	-	-			-2.8964	1.53322	0.0965083	-2.84707	-	-			0			0	-	-			NaN	NaN	NaN	NaN				+					-	-			-3.6311	2.00406	0.0401123	-3.50642		+
P11835	Itgb2	Integrin beta-2	Itgb2	-0.0251687	0.0280915	0.986863	-0.0826131	-	-			2.19966	4.28863	0.00292683	7.18887	+	-			-0.720653	0.985776	0.658161	-1.79236	-	-			1.50418	1.47764	0.200792	2.74995					1.479	1.74	0.164967	3.06492	-	-			2.22484	3.78744	0.00303797	6.63612	+
P11881	Itpr1	Inositol 1,4,5-trisphosphate receptor type 1	Itpr1	-0.044059	0.030824	0.984249	-0.0887199	-	-			0.210582	0.15032	0.843619	0.386219	-	-			-0.869318	1.04242	0.630517	-1.89441	-	-			-0.614655	1.27677	0.260323	-2.32667					-0.658736	0.572304	0.637646	-1.20397	-	-			0.254634	0.254818	0.732737	0.608952
P11928	Oas1a	2'-5'-oligoadenylate synthase 1A	Oas1a	0.502059	0.798766	0.689697	1.57639	-	-			-0.0173595	0.0166046	0.980462	-0.0483566	-	-			-0.521879	0.46412	0.842092	-1.0069	-	-			-1.04127	1.01695	0.352993	-1.97134					-0.539238	0.347507	0.788379	-0.820519	-	-			-0.519426	1.00174	0.224325	-1.81491
P11930	Nudt19	Nucleoside diphosphate-linked moiety X motif 19	Nudt19	0.947771	1.42981	0.511851	2.49606	-	-			0.306455	0.362226	0.648707	0.818358	-	-			0.055684	0.0574097	0.990975	0.15949	-	-			-0.585649	0.870222	0.415613	-1.62685					0.362139	0.295514	0.816922	0.69558	-	-			-0.641345	1.74437	0.0629341	-2.77655
P11983	Tcp1	T-complex protein 1 subunit alpha	Tcp1	0.0828511	0.168539	0.951583	0.427094	-	-			0.342331	1.69835	0.0735517	2.71728	-	-			-0.0154972	0.0339034	0.99367	-0.096259	-	-			0.243988	0.549647	0.607631	1.13111					0.326834	0.892316	0.44753	1.64536	-	-			0.259488	0.940482	0.248425	1.71316
P12023	App	Amyloid-beta A4 protein	App					-	-	+		0.00445334	0.00650413	0.989609	0.0193066	-	-			-0.05911	0.0778527	0.985216	-0.214019	-	-			NaN	NaN	NaN	NaN			+		-0.0546567	0.0494413	0.964935	-0.142302	-	-			NaN	NaN	NaN	NaN
P12246	Apcs	Serum amyloid P-component	Apcs					-	-							-	-			-0.50404	0.229025	0.926292	-0.553377	-	-			NaN	NaN	NaN	NaN			+						-	-			NaN	NaN	NaN	NaN
P12367	Prkar2a	cAMP-dependent protein kinase type II-alpha regulatory subunit	Prkar2a	-0.266384	0.656105	0.743393	-1.30615	-	-			-0.396738	2.41277	0.0256737	-3.6433	-	+			-0.219626	0.329416	0.894183	-0.751087	-	-			-0.349966	0.452791	0.68159	-0.975031					-0.616364	1.07808	0.346404	-1.92191	-	-			-0.130362	0.307166	0.68288	-0.709154
P12787	Cox5a	Cytochrome c oxidase subunit 5A, mitochondrial	Cox5a	-0.307041	0.547895	0.791568	-1.1341	-	-			-0.725323	2.43662	0.02475	-3.67475	-	+			0.0753653	0.161193	0.959188	0.408737	-	-			-0.342938	0.700165	0.511722	-1.36523					-0.649958	2.47093	0.10395	-3.7201	-	+			-0.418295	0.835306	0.298813	-1.56399
P12791	Cyp2b10	Cytochrome P450 2B10	Cyp2b10					-	-							-	-			0			0	-	-			NaN	NaN	NaN	NaN									-	-			NaN	NaN	NaN	NaN
P12815	Pdcd6	Programmed cell death protein 6	Pdcd6	0.245342	0.484143	0.821838	1.02841	-	-			0.260334	0.758002	0.35445	1.45141	-	-			-0.283261	0.431574	0.854679	-0.93103	-	-			-0.268267	0.333111	0.775579	-0.757973					-0.0229268	0.0239031	0.984046	-0.0687169	-	-			0.0149904	0.02429	0.968014	0.0698002
P12960	Cntn1	Contactin-1	Cntn1	0.0962632	0.110124	0.963847	0.304367	-	-			0.299788	0.301319	0.700408	0.72728	-	-			0			0	-	-			NaN	NaN	NaN	NaN				+					-	-			0.203533	0.170872	0.813343	0.445291
P12961	Scg5	Neuroendocrine protein 7B2	Scg5	-0.430395	0.219477	0.93538	-0.538512	-	-			-0.372933	0.661444	0.409537	-1.32429	-	-			0.812857	0.621642	0.763568	1.28711	-	-			0.870325	0.330528	0.775851	0.768777					0.439924	0.314424	0.812743	0.732419	-	-			0.0575001	0.0229089	0.968777	0.0664926
P12970	Rpl7a	60S ribosomal protein L7a	Rpl7a	-0.0228507	0.0393655	0.98002	-0.111606	-	-			0.512143	1.71529	0.0720856	2.7391	-	-			-0.300122	0.837407	0.687385	-1.55713	-	-			0.234884	0.540041	0.614746	1.11559					0.212021	0.504174	0.68552	1.05693	-	-			0.534998	1.69063	0.0691378	2.70734
P13011;P13516;Q99PL7	Scd1;Scd2;Scd3	Acyl-CoA desaturase 2	Scd1					-	-		+					-	-		+	0.188873	0.0847113	0.981431	0.231431	-	-			0.351175	0.311827	0.788197	0.748735									-	-		+	0.162289	0.0915632	0.894246	0.24772
P13020	Gsn	Gelsolin	Gsn	-0.466686	1.02156	0.599947	-1.84283	-	-			-0.609527	4.60784	0.00218182	-6.9363	-	+			0.0282143	0.0533989	0.992095	0.148644	-	-			-0.114662	0.149939	0.907616	-0.384351					-0.581313	1.73188	0.165217	-2.76047	-	-			-0.142862	0.263455	0.721839	-0.62426
P13405	Rb1	Retinoblastoma-associated protein	Rb1					-	-							-	-			0			0	-	-			NaN	NaN	NaN	NaN									-	-			NaN	NaN	NaN	NaN
P13412	Tnni2	Troponin I, fast skeletal muscle	Tnni2	-0.00298258	0.00114876	0.993623	-0.00340386	-	-			-1.07125	0.782914	0.340197	-1.48799	-	-			-1.18221	0.812709	0.700336	-1.54276	-	-			-2.25048	1.36626	0.232347	-2.40222					-2.25345	1.34729	0.258022	-2.32726	-	-			-1.06828	0.853581	0.289451	-1.60265
P13439	Umps	Uridine 5'-monophosphate synthase	Umps	0.155187	0.155019	0.95505	0.399735	-	-			-0.0849641	0.257771	0.741455	-0.617242	-	-			-0.487828	0.745325	0.729354	-1.43267	-	-			-0.728017	0.820679	0.44018	-1.55449					-0.572792	0.608048	0.613068	-1.25014	-	-			-0.240164	0.371831	0.626385	-0.828896
P13541	Myh3	Myosin-3	Myh3	-0.729689	0.137235	0.962666	-0.371563	-	-							-	-			0			0	-	-			NaN	NaN	NaN	NaN				+					-	-			NaN	NaN	NaN	NaN
P13542	Myh8	Myosin-8	Myh8	0.647044	0.461011	0.825924	0.994572	-	-			-0.779246	0.67385	0.400419	-1.32539	-	-			-1.74825	2.4159	0.527556	-3.57205	-	+			-3.17451	3.87898	0.0422222	-5.99985		+			-2.5275	2.62732	0.0931333	-3.92835	-	+			-1.42627	2.03419	0.0385302	-3.21566		+
P13595	Ncam1	Neural cell adhesion molecule 1	Ncam1	0.07656	0.129697	0.961684	0.338716	-	-			-0.0846019	0.165783	0.82953	-0.419848	-	-			-0.237263	0.396069	0.873635	-0.872218	-	-			-0.3984	0.667166	0.531974	-1.32329					-0.321865	0.523173	0.673003	-1.09354	-	-			-0.161164	0.338728	0.655292	-0.768401
P13634	Ca1	Carbonic anhydrase 1	Ca1	0.239979	0.258511	0.922594	0.616361	-	-			-0.847212	2.59002	0.0201564	-3.87844	-	+			0.486277	0.535823	0.799281	1.10412	-	-			-0.600924	0.518304	0.631965	-1.08018					-0.360935	0.338726	0.796263	-0.768396	-	-			-1.08719	1.87288	0.0500216	-2.94197
P13707	Gpd1	Glycerol-3-phosphate dehydrogenase [NAD(+)], cytoplasmic	Gpd1	-0.0950727	0.0611439	0.975826	-0.169644	-	-			-0.621046	0.735228	0.367391	-1.41769	-	-			-0.695746	0.721586	0.741155	-1.38974	-	-			-1.22172	1.15744	0.303007	-2.01007					-1.31679	1.70561	0.168545	-2.72664	-	-			-0.525962	0.422296	0.583351	-0.918245
P13745	Gsta1	Glutathione S-transferase A1	Gsta1	-0.580013	1.69114	0.479889	-2.75327	-	-			-0.481893	1.22211	0.162266	-2.09649	-	-			-0.0405067	0.0509845	0.992021	-0.142537	-	-			0.0576	0.0756194	0.94845	0.206958					-0.5224	1.02418	0.372241	-1.84652	-	-			0.0981095	0.173058	0.811217	0.435902
P14069	S100a6	Protein S100-A6	S100a6	-0.88236	1.11299	0.585373	-1.97041	-	-			-0.559115	0.87648	0.294253	-1.62289	-	-			-0.7663	1.07632	0.617452	-1.90046	-	-			-0.44305	0.399399	0.7225	-0.881656					-1.32541	1.68607	0.17218	-2.74646	-	-			0.323272	0.399891	0.603037	0.878979
P14094	Atp1b1	Sodium/potassium-transporting ATPase subunit beta-1	Atp1b1	0.504066	1.27793	0.549759	2.19674	-	-			-0.90254	2.28809	0.0302963	-3.47969	-	+			0.643727	0.723747	0.739096	1.39293	-	-			-0.762826	0.854874	0.42414	-1.59206					-0.258813	0.214373	0.86378	-0.524381	-	-			-1.40658	4.1086	0.00107143	-6.09545		+
P14115	Rpl27a	60S ribosomal protein L27a	Rpl27a	0.59721	0.816945	0.68877	1.549	-	-			0.783166	1.32978	0.137477	2.23883	-	-			-0.201996	0.318268	0.895986	-0.728061	-	-			-0.0160575	0.018096	0.984101	-0.0523497					0.58117	0.837267	0.472182	1.56681	-	-			0.185943	0.282719	0.704949	0.662107
P14131	Rps16	40S ribosomal protein S16	Rps16	0.247393	0.587194	0.782639	1.19755	-	-			0.438161	1.0437	0.222289	1.85595	-	-			-0.15262	0.149138	0.963737	-0.381705	-	-			0.0381315	0.0325391	0.977832	0.0926933					0.285541	0.274502	0.834734	0.64605	-	-			0.190731	0.535549	0.488084	1.10831
P14142	Slc2a4	Solute carrier family 2, facilitated glucose transporter member 4	Slc2a4	-0.0161634	0.0120806	0.991098	-0.0358477	-	-			-0.529651	0.444114	0.578537	-0.980172	-	-			0			0	-	-			NaN	NaN	NaN	NaN				+					-	-			-0.51348	0.525586	0.494746	-1.10424
P14148	Rpl7	60S ribosomal protein L7	Rpl7	0.0453774	0.099349	0.96402	0.266165	-	-			0.426678	2.76317	0.0173659	4.11158	+	-			-0.0435761	0.0919967	0.977956	-0.246975	-	-			0.337745	0.792554	0.454109	1.50207					0.383102	1.22035	0.297382	2.09415	-	-			0.381288	1.36442	0.118463	2.28429
P14152	Mdh1	Malate dehydrogenase, cytoplasmic	Mdh1	-0.756058	1.14361	0.573051	-2.01275	-	-			-0.695845	3.87957	0.00424242	-5.73129	-	+			-0.278885	0.400823	0.87318	-0.877672	-	-			-0.218669	0.185187	0.875788	-0.462339					-0.97473	1.86362	0.143904	-2.93004	-	-			0.0602166	0.0608409	0.926863	0.16846
P14206	Rpsa	40S ribosomal protein SA	Rpsa	0.285684	0.550677	0.789223	1.13863	-	-			0.359593	1.18872	0.173083	2.05197	-	-			-0.149877	0.192147	0.945953	-0.476222	-	-			-0.0759761	0.0744198	0.949045	-0.203421					0.209716	0.26007	0.841193	0.617535	-	-			0.0739238	0.120198	0.867044	0.315574
P14211	Calr	Calreticulin	Calr	0.00922775	0.019882	0.989731	0.0575354	-	-			0.163024	0.412707	0.603896	0.901515	-	-			-0.0311881	0.0631659	0.991751	-0.174167	-	-			0.122621	0.327479	0.778834	0.747469					0.131835	0.352681	0.783391	0.794094	-	-			0.153793	0.388676	0.611693	0.859086
P14234	Fgr	Tyrosine-protein kinase Fgr	Fgr					-	-							-	-		+	0			0	-	-	+		NaN	NaN	NaN	NaN									-	-			NaN	NaN	NaN	NaN
P14429	H2-Q7	H-2 class I histocompatibility antigen, Q7 alpha chain	H2-Q7					-	-							-	-		+	-0.110419	0.0627568	0.991193	-0.174967	-	-			NaN	NaN	NaN	NaN			+						-	-		+	NaN	NaN	NaN	NaN
P14432	H2-T3	H-2 class I histocompatibility antigen, TLA(B) alpha chain	H2-T3					-	-							-	-			0			0	-	-			NaN	NaN	NaN	NaN				+					-	-			NaN	NaN	NaN	NaN
P14576	Srp54	Signal recognition particle 54 kDa protein	Srp54	0.331815	0.470247	0.822409	1.00488	-	-			0.436114	1.02338	0.228271	1.82809	-	-			-0.189749	0.27589	0.9111	-0.647026	-	-			-0.0854592	0.0853966	0.940187	-0.231083					0.246366	0.279392	0.832301	0.655621	-	-			0.104312	0.181969	0.802523	0.455363
P14602	Hspb1	Heat shock protein beta-1	Hspb1	-0.255577	0.64792	0.749681	-1.29341	-	-			0.0913023	0.181036	0.815738	0.453337	-	-			-0.334858	0.494975	0.826822	-1.03761	-	-			0.012019	0.0121459	0.986857	0.0353673					-0.243555	0.342366	0.79463	-0.775128	-	-			0.346862	0.756277	0.340713	1.44886
P14685	Psmd3	26S proteasome non-ATPase regulatory subunit 3	Psmd3	-0.179588	0.385972	0.861244	-0.857637	-	-			0.458824	3.1621	0.0109554	4.66465	+	-			-0.0293244	0.133385	0.967151	-0.345697	-	-			0.609059	2.08611	0.101389	3.21709	+				0.4295	2.59316	0.0915758	3.88264	+	-			0.638388	2.30314	0.0244358	3.49938	+
P14824	Anxa6	Annexin A6	Anxa6	-0.189213	0.498002	0.813059	-1.0517	-	-			0.182876	0.542178	0.491879	1.11905	-	-			-0.67454	1.87053	0.409633	-2.8941	-	-			-0.302472	0.585317	0.583936	-1.18807					-0.491664	1.06141	0.354285	-1.88016	-	-			0.372086	1.4885	0.0958413	2.44607
P14869	Rplp0	60S acidic ribosomal protein P0	Rplp0	0.376181	0.845259	0.672359	1.59051	-	-			0.53517	2.42321	0.025244	3.65706	+	-			0.0924192	0.233149	0.926387	0.561805	-	-			0.251419	0.49748	0.648214	1.04585					0.627589	2.55003	0.0934648	3.8251	+	-			0.158977	0.299894	0.688937	0.69527
P14873	Map1b	Microtubule-associated protein 1B	Map1b	-0.42936	1.19245	0.573363	-2.07996	-	-			0.144396	0.431108	0.591406	0.933523	-	-			-0.178061	0.370391	0.878291	-0.826296	-	-			0.3957	0.786099	0.45529	1.50339					-0.0336653	0.0568301	0.957217	-0.158336	-	-			0.573752	1.70642	0.067718	2.72767
P15089	Cpa3	Mast cell carboxypeptidase A	Cpa3	-0.660368	0.682794	0.735664	-1.3578	-	-			-0.603378	1.00543	0.234172	-1.80337	-	-			-1.34293	1.69083	0.415071	-2.75285	-	-			-1.2859	1.05516	0.336392	-1.94201					-1.94631	2.44695	0.100837	-3.90846	-	+			0.0570083	0.0422002	0.946871	0.119298
P15208	Insr	Insulin receptor	Insr	-0.481209	0.684205	0.734679	-1.41462	-	-			-0.869821	1.04037	0.223225	-1.91994	-	-			0.675353	0.693733	0.746582	1.38848	-	-			0.286733	0.297916	0.798845	0.711304					-0.194468	0.19902	0.876078	-0.517071	-	-			-0.388614	0.465872	0.546229	-0.997427
P15261	Ifngr1	Interferon gamma receptor 1	Ifngr1	-0.830334	0.466677	0.824978	-1.07865	-	-			-0.0918741	0.172584	0.823318	-0.441639	-	-			0			0	-	-			NaN	NaN	NaN	NaN				+					-	-			0.73845	0.686178	0.380848	1.39397
P15306	Thbd	Thrombomodulin	Thbd					-	-			-0.38675	0.332894	0.673587	-0.780751	-	-			-0.94065	0.780538	0.714193	-1.57751	-	-			NaN	NaN	NaN	NaN			+		-1.3274	1.21973	0.29741	-2.59612	-	-			NaN	NaN	NaN	NaN
P15327	Bpgm	Bisphosphoglycerate mutase	Bpgm	0.092559	0.0949375	0.965862	0.258251	-	-			-0.218628	0.262646	0.735642	-0.630098	-	-			0.140615	0.172848	0.954516	0.442229	-	-			-0.170587	0.217952	0.85499	-0.544993					-0.0780129	0.0466848	0.965734	-0.134731	-	-			-0.311187	1.18496	0.163395	-2.0981
P15331	Prph	Peripherin	Prph	-0.550909	1.17379	0.575055	-2.05433	-	-			0.101594	0.21254	0.786248	0.520548	-	-			-0.314956	0.773547	0.718089	-1.46568	-	-			0.337541	0.602357	0.573768	1.21493					-0.213362	0.456259	0.718212	-0.976641	-	-			0.652497	1.5382	0.089027	2.51052
P15379	Cd44	CD44 antigen	Cd44	0.294284	0.174588	0.951569	0.446127	-	-			0.641164	0.654563	0.415302	1.31343	-	-			-0.961128	0.90729	0.670685	-1.69767	-	-			-0.614245	0.359199	0.753029	-0.823603					-0.319964	0.163534	0.89881	-0.424178	-	-			0.34688	0.298083	0.691006	0.694133
P15508	Sptb	Spectrin beta chain, erythrocytic	Sptb	-0.0724655	0.0563666	0.977191	-0.157561	-	-			-0.416919	0.469796	0.555464	-1.00972	-	-			-1.00426	2.03428	0.437017	-3.55826	-	+			-1.34873	1.97928	0.117436	-3.46414					-1.42118	1.2391	0.294085	-2.34229	-	-			-0.344483	0.640744	0.40911	-1.28221
P15530	Cd79b	B-cell antigen receptor complex-associated protein beta chain	Cd79b					-	-							-	-			0			0	-	-			NaN	NaN	NaN	NaN									-	-			NaN	NaN	NaN	NaN
P15532	Nme1	Nucleoside diphosphate kinase A	Nme1	0.486869	0.65394	0.74483	1.30278	-	-			0.460104	0.756531	0.355005	1.44924	-	-			-0.287871	0.299137	0.906057	-0.691874	-	-			-0.314645	0.285877	0.808936	-0.668246					0.172233	0.134682	0.917635	0.349433	-	-			-0.0267598	0.0333336	0.956903	-0.0948779
P15535	B4galt1	Beta-1,4-galactosyltransferase 1	B4galt1	-0.0238094	0.0384561	0.980306	-0.110971	-	-			-0.319604	0.454627	0.569802	-0.983514	-	-			0			0	-	-			NaN	NaN	NaN	NaN				+					-	-			-0.295765	0.394584	0.60729	-0.87736
P15626	Gstm2	Glutathione S-transferase Mu 2	Gstm2	0.496011	0.874208	0.652761	1.63264	-	-			-0.668117	1.54094	0.0956624	-2.51406	-	-			-0.07544	0.136928	0.967176	-0.353867	-	-			-1.23956	3.4079	0.0426667	-5.01856		+			-0.743557	2.45027	0.105317	-3.69279	-	+			-1.1641	2.57403	0.0147898	-3.85709		+
P15702	Spn	Leukosialin	Spn					-	-			1.09016	1.31665	0.139916	2.32905	-	-			0.665901	0.707832	0.743386	1.41089	-	-			NaN	NaN	NaN	NaN			+		1.75606	1.67602	0.175226	3.68639	-	-			NaN	NaN	NaN	NaN
P15864	Hist1h1c	Histone H1.2	Hist1h1c	0.149535	0.172379	0.952569	0.435585	-	-			-0.023031	0.0223181	0.974936	-0.0642693	-	-			0.380613	0.535349	0.799681	1.10335	-	-			0.208033	0.262541	0.824381	0.622446					0.357582	0.519406	0.676793	1.08198	-	-			-0.17261	0.192036	0.793084	-0.477093
P15920	Atp6v0a2	V-type proton ATPase 116 kDa subunit a isoform 2	Atp6v0a2					-	-			0.54958	0.695389	0.387471	1.36671	-	-			0.227667	0.248139	0.922216	0.597729	-	-			NaN	NaN	NaN	NaN			+		0.777247	0.767639	0.512602	1.52638	-	-			NaN	NaN	NaN	NaN
P15947	Klk1	Kallikrein-1	Klk1	-0.389233	0.771346	0.694993	-1.48143	-	-			-1.92799	2.29727	0.0300515	-3.4917	-	+			0.386423	0.28856	0.910041	0.673445	-	-			-1.15233	2.3742	0.0816333	-3.6831		+			-1.54157	2.89408	0.0953143	-4.42896	-	+			-1.53875	1.82559	0.0542346	-2.8811
P16014	Chgb	Secretogranin-1	Chgb	-0.37279	0.378658	0.867122	-0.848491	-	-			-0.365584	0.525639	0.50616	-1.09761	-	-			1.23293	2.80897	0.498857	4.17389	+	-			1.24015	1.99754	0.113174	3.16594					0.867344	1.47355	0.225285	2.50457	-	-			0.00720456	0.00662543	0.988781	0.0194119
P16015	Ca3	Carbonic anhydrase 3	Ca3	-0.943645	0.252994	0.927769	-0.605281	-	-			-1.04425	0.848164	0.306861	-1.58246	-	-			-2.73814	1.09148	0.611573	-1.90509	-	-			-2.83874	0.729558	0.49387	-1.40925					-3.78239	1.49322	0.222164	-2.4522	-	-			-0.1006	0.0240724	0.968355	-0.069191
P16045	Lgals1	Galectin-1	Lgals1	-0.0796925	0.179755	0.94862	-0.451782	-	-			-0.0200035	0.0576925	0.939388	-0.160231	-	-			-0.15741	0.31124	0.89864	-0.714839	-	-			-0.0977043	0.145695	0.911687	-0.374712					-0.177414	0.295609	0.817364	-0.687046	-	-			0.0596667	0.183699	0.801165	0.459116
P16110	Lgals3	Galectin-3	Lgals3	-0.157379	0.138673	0.962159	-0.35956	-	-			-0.795835	1.03955	0.223613	-1.85028	-	-			-0.0369328	0.0347968	0.992979	-0.0987037	-	-			-0.675388	0.996547	0.357402	-1.79111					-0.832768	0.884024	0.454648	-1.63361	-	-			-0.63846	1.49979	0.0946128	-2.46072
P16125	Ldhb	L-lactate dehydrogenase B chain	Ldhb	-0.791947	2.16785	0.422531	-3.39795	-	+			-0.0767528	0.232569	0.763666	-0.562023	-	-			-0.826982	2.54131	0.579667	-3.72973	-	+			-0.111778	0.149217	0.908612	-0.382714					-0.903735	2.79835	0.1009	-4.15942	-	+			0.715193	1.91978	0.0458641	3.00237
P16254	Srp14	Signal recognition particle 14 kDa protein	Srp14	-1.05905	1.52745	0.523468	-3.30887	-	-			0.111448	0.123145	0.865223	0.325566	-	-			-0.654772	0.635309	0.76308	-1.28291	-	-			0.515734	0.289506	0.806253	0.702975					-0.543324	0.290785	0.820199	-0.705616	-	-			1.17051	2.35302	0.0222799	3.91719	+
P16294	F9	Coagulation factor IX	F9					-	-							-	-			0			0	-	-			NaN	NaN	NaN	NaN									-	-			NaN	NaN	NaN	NaN
P16330	Cnp	2',3'-cyclic-nucleotide 3'-phosphodiesterase	Cnp	-0.137901	0.308339	0.897045	-0.716839	-	-			0.0755633	0.195678	0.799641	0.486253	-	-			-0.497648	0.657146	0.754622	-1.29339	-	-			-0.284181	0.286025	0.809252	-0.668532					-0.422085	0.42902	0.732457	-0.933864	-	-			0.213462	0.578676	0.454319	1.17754
P16332	Mut	Methylmalonyl-CoA mutase, mitochondrial	Mut	-0.161152	0.292501	0.904459	-0.689656	-	-			-0.701868	2.67877	0.0186277	-4.46568	-	+			-0.204437	0.185851	0.949026	-0.471166	-	-			-0.74515	0.786195	0.455854	-1.55623					-0.906305	0.797835	0.495718	-1.65279	-	-			-0.540717	1.73732	0.0636475	-2.81524
P16406	Enpep	Glutamyl aminopeptidase	Enpep	0.723816	0.578528	0.783849	1.20149	-	-			0.747986	0.715561	0.377799	1.40876	-	-			-0.302557	0.335842	0.890687	-0.773471	-	-			-0.27842	0.2493	0.833113	-0.606626					0.445429	0.262498	0.839482	0.633746	-	-			0.0241464	0.0261875	0.966455	0.0754812
P16460	Ass1	Argininosuccinate synthase	Ass1	-0.276486	1.74603	0.474317	-2.82693	-	-			0.25561	1.70191	0.0732129	2.72187	-	-			-0.151225	0.843709	0.685906	-1.56605	-	-			0.380888	2.49888	0.0745306	3.75712	+				0.104386	0.849093	0.463927	1.58379	-	-			0.532088	2.95963	0.00802051	4.38093	+
P16546	Sptan1	Spectrin alpha chain, non-erythrocytic 1	Sptan1	-0.340226	2.68362	0.486667	-4.12155	-	+			-0.317755	3.3355	0.00857143	-4.91317	-	+			-0.214505	0.513	0.811986	-1.06715	-	-			-0.192034	0.391835	0.730494	-0.864707					-0.53226	1.55357	0.204992	-2.53041	-	-			0.0224808	0.0864325	0.898813	0.233667
P16675	Ctsa	Lysosomal protective protein	Ctsa	-0.051485	0.0334163	0.983387	-0.0955885	-	-			-0.343494	0.276212	0.72364	-0.65151	-	-			0.785602	0.685973	0.747646	1.36277	-	-			0.493625	0.371445	0.745729	0.840256					0.442108	0.350718	0.784762	0.807499	-	-			-0.291979	0.225981	0.760036	-0.548481
P16858	Gapdh	Glyceraldehyde-3-phosphate dehydrogenase	Gapdh	0.238932	0.287795	0.904813	0.674192	-	-			0.0806395	0.0951273	0.896742	0.255182	-	-			-0.588016	1.73535	0.409914	-2.72628	-	-			-0.746333	1.93217	0.124681	-3.01833					-0.507377	0.812165	0.487005	-1.53057	-	-			-0.158319	0.302501	0.686181	-0.700259
P17012;P23607	Zfa;Zfx	Zinc finger X-chromosomal protein	Zfa	-1.38478	0.632984	0.759824	-1.35703	-	-			-0.190228	0.292477	0.708447	-0.709107	-	-			0			0	-	-			NaN	NaN	NaN	NaN				+					-	-			1.19455	0.640499	0.409234	1.33979
P17047	Lamp2	Lysosome-associated membrane glycoprotein 2	Lamp2	-0.726653	0.728663	0.713763	-1.44382	-	-			-0.168263	0.120294	0.866942	-0.31659	-	-			0.74815	0.542974	0.794832	1.13315	-	-			1.30655	1.05089	0.3381	1.97417					0.579887	0.673535	0.574987	1.37318	-	-			0.5584	0.387647	0.612923	0.860645
P17095	Hmga1	High mobility group protein HMG-I/HMG-Y	Hmga1	-0.508963	0.349497	0.885795	-0.791174	-	-			-0.272493	0.187741	0.808597	-0.467853	-	-			0.794709	0.52909	0.798991	1.1033	-	-			1.03117	0.644784	0.547786	1.29796					0.522216	0.302963	0.814635	0.706464	-	-			0.236464	0.145792	0.838363	0.374932
P17156	Hspa2	Heat shock-related 70 kDa protein 2	Hspa2	-0.557315	0.612238	0.77018	-1.23739	-	-			0.422104	1.31495	0.140171	2.21932	-	-			-0.290428	0.767662	0.719313	-1.46563	-	-			0.689016	0.794735	0.453974	1.5162					0.131676	0.61013	0.610879	1.23406	-	-			0.979447	1.2891	0.136262	2.18524
P17182	Eno1	Alpha-enolase	Eno1	0.0921542	0.137641	0.96234	0.357177	-	-			0.000863802	0.0011858	0.995193	0.00349585	-	-			-0.115527	0.190476	0.945626	-0.472645	-	-			-0.206805	0.359512	0.752668	-0.806568					-0.114663	0.173938	0.893808	-0.437832	-	-			-0.091262	0.14725	0.837444	-0.378251
P17183	Eno2	Gamma-enolase	Eno2	-0.522041	1.07775	0.588318	-1.94521	-	-			0.0793921	0.11612	0.870907	0.30591	-	-			0.101837	0.093771	0.975623	0.253199	-	-			0.703325	0.801361	0.451517	1.58055					0.181229	0.204728	0.873616	0.509545	-	-			0.601472	1.0349	0.210559	1.86156
P17225	Ptbp1	Polypyrimidine tract-binding protein 1	Ptbp1	-0.354508	1.14219	0.572844	-2.0108	-	-			-0.0673754	0.184444	0.812448	-0.46073	-	-			0.120562	0.190706	0.945442	0.473138	-	-			0.407707	0.741742	0.487573	1.42736					0.0531865	0.0652701	0.950699	0.179957	-	-			0.287164	1.37447	0.115909	2.29745
P17426	Ap2a1	AP-2 complex subunit alpha-1	Ap2a1	0.289823	0.238223	0.928556	0.577441	-	-			0.263783	0.452564	0.571385	0.974641	-	-			-0.248132	0.489628	0.828393	-1.0328	-	-			-0.274183	0.254413	0.828686	-0.608137					0.0156511	0.0153989	0.986357	0.0449046	-	-			-0.0260331	0.0235454	0.96845	-0.0677144
P17427	Ap2a2	AP-2 complex subunit alpha-2	Ap2a2	-0.592484	1.47836	0.511712	-2.46765	-	-			0.363846	1.11766	0.194627	1.95651	-	-			-0.590893	0.668046	0.754238	-1.30987	-	-			0.365429	0.315136	0.78553	0.724269					-0.227046	0.179687	0.891868	-0.450399	-	-			0.956329	3.46922	0.00420513	5.10861	+
P17439	Gba	Glucosylceramidase	Gba	-0.228527	0.696218	0.726621	-1.36797	-	-			0.128621	0.295188	0.706155	0.686236	-	-			0.409112	0.851243	0.687081	1.58687	-	-			0.76625	1.87832	0.13242	3.00485					0.537733	1.41478	0.237696	2.38203	-	-			0.357167	0.893775	0.26998	1.64743
P17563	Selenbp1	Methanethiol oxidase	Selenbp1	-0.19118	0.425208	0.840498	-0.927204	-	-			-2.0915	3.98778	0.00393333	-5.90177	-	+			0.389131	0.310858	0.89911	0.714119	-	-			-1.51119	1.88441	0.1312	-2.95681					-1.70237	2.18753	0.106827	-3.34863	-	+			-1.90032	3.60065	0.0042	-5.30413		+
P17665	Cox7c	Cytochrome c oxidase subunit 7C, mitochondrial	Cox7c	0.094669	0.0850921	0.96836	0.230873	-	-			-0.524725	1.48896	0.104518	-2.44666	-	-			0.0375923	0.0556072	0.991559	0.155114	-	-			-0.581797	0.629434	0.556165	-1.27355					-0.487133	0.76256	0.51715	-1.48094	-	-			-0.619388	1.01987	0.216035	-1.82327
P17710	Hk1	Hexokinase-1	Hk1	-0.372445	0.710832	0.718488	-1.39027	-	-			-0.22235	1.71253	0.0723413	-2.73554	-	-			0.0584496	0.170382	0.955899	0.429051	-	-			0.208571	0.332594	0.775314	0.75701					-0.1639	0.552313	0.651585	-1.1354	-	-			0.150086	0.253453	0.732832	0.604322
P17742	Ppia	Peptidyl-prolyl cis-trans isomerase A	Ppia	0.305782	0.211083	0.937919	0.518988	-	-			-0.195366	0.135256	0.857375	-0.350762	-	-			0.0569501	0.0275934	0.994755	0.0790145	-	-			-0.444184	0.238479	0.838961	-0.575828					-0.138416	0.0556022	0.957943	-0.155101	-	-			-0.501153	0.682352	0.38269	-1.33831
P17751	Tpi1	Triosephosphate isomerase	Tpi1	-0.105085	0.111548	0.964761	-0.295731	-	-			-0.567782	0.849671	0.306907	-1.58461	-	-			-0.141969	0.166577	0.957658	-0.420667	-	-			-0.604655	1.0032	0.35527	-1.8003					-0.70975	1.28762	0.278936	-2.1833	-	-			-0.462683	0.629242	0.416329	-1.25687
P17809	Slc2a1	Solute carrier family 2, facilitated glucose transporter member 1	Slc2a1	0.569026	0.39281	0.858957	0.869898	-	-			1.06449	0.930647	0.267685	1.69938	-	-			0.121791	0.133089	0.967563	0.345744	-	-			0.617217	1.03415	0.346161	1.86051					1.18629	1.00667	0.382022	1.82186	-	-			0.495457	0.715479	0.364004	1.38823
P17897	Lyz1	Lysozyme C-1	Lyz1	-1.11494	0.903702	0.645757	-1.84201	-	-			1.49641	1.41297	0.118445	2.47117	-	-			0.308467	0.214626	0.930279	0.526436	-	-			2.91979	2.47668	0.0741961	4.35445	+				1.80488	1.16022	0.321094	2.20995	-	-			2.61136	3.28227	0.00491667	5.25807	+
P17918	Pcna	Proliferating cell nuclear antigen	Pcna	-0.0246213	0.0269787	0.986686	-0.0774809	-	-			0.545703	1.00694	0.233649	1.80546	-	-			-0.00384625	0.00517046	1	-0.0152083	-	-			0.56647	1.24702	0.27043	2.18597					0.541856	0.775865	0.508344	1.5012	-	-			0.570307	1.61499	0.0785802	2.60978
P18052	Ptpra	Receptor-type tyrosine-protein phosphatase alpha	Ptpra	0.361354	0.249589	0.929971	0.600679	-	-			0.114968	0.051602	0.947322	0.144176	-	-			0.476173	0.215345	0.929714	0.529826	-	-			0.229775	0.160402	0.899901	0.414107					0.591141	0.598118	0.621196	1.23384	-	-			-0.2464	0.104036	0.883104	-0.277591
P18181	Cd48	CD48 antigen	Cd48					-	-							-	-			0			0	-	-			NaN	NaN	NaN	NaN									-	-			NaN	NaN	NaN	NaN
P18242	Ctsd	Cathepsin D	Ctsd	-1.15206	1.52491	0.519417	-2.53021	-	-			0.0221497	0.0333495	0.963451	0.0949215	-	-			0.258159	0.38246	0.878687	0.851316	-	-			1.4324	1.60466	0.179845	2.68866					0.280309	0.374182	0.774754	0.840319	-	-			1.17423	1.77655	0.0591266	2.81798
P18419	Svs4	Seminal vesicle secretory protein 4	Svs4	0.898051	0.252824	0.926896	0.607242	-	-			-1.74733	0.731837	0.368413	-1.41265	-	-			-1.32502	1.31722	0.551462	-2.19962	-	-			-3.97042	3.65534	0.0446667	-5.62105		+			-3.07235	1.48563	0.222814	-2.44235	-	-			-2.64538	2.60652	0.0142896	-4.01091		+
P18572	Bsg	Basigin	Bsg	-0.954865	0.881384	0.650388	-1.64303	-	-			-1.08612	4.11093	0.00452174	-6.09922	-	+			0.278195	0.263726	0.915991	0.623152	-	-			0.146936	0.0770655	0.947194	0.210136					-0.807927	0.953961	0.408154	-1.732	-	-			-0.13125	0.0883429	0.897447	-0.238421
P18653	Rps6ka1	Ribosomal protein S6 kinase alpha-1	Rps6ka1	-0.11401	0.458793	0.827294	-0.985329	-	-			-0.341104	1.30388	0.142732	-2.20475	-	-			0.0546526	0.0878204	0.979687	0.23665	-	-			-0.172447	0.338594	0.770566	-0.768152					-0.286451	0.663829	0.576813	-1.31011	-	-			-0.227105	0.719569	0.361666	-1.39435
P18760	Cfl1	Cofilin-1	Cfl1	-0.336857	0.754176	0.704768	-1.45575	-	-			0.066539	0.123077	0.864762	0.322362	-	-			0.259795	0.49396	0.827646	1.03594	-	-			0.663181	1.44625	0.209842	2.39115					0.326334	0.571011	0.637907	1.16534	-	-			0.403367	1.14212	0.176193	1.98949
P18826	Phka1	Phosphorylase b kinase regulatory subunit alpha, skeletal muscle isoform	Phka1	0.983091	0.706842	0.718998	1.49001	-	-							-	-			0			0	-	-			NaN	NaN	NaN	NaN				+					-	-			NaN	NaN	NaN	NaN
P18872	Gnao1	Guanine nucleotide-binding protein G(o) subunit alpha	Gnao1	0.232456	0.616399	0.771643	1.24397	-	-			-0.00482754	0.00974112	0.985801	-0.0284409	-	-			0.0976511	0.200215	0.939893	0.493387	-	-			-0.139607	0.273578	0.816534	-0.644237					0.0928235	0.13963	0.915923	0.360841	-	-			-0.237278	1.46995	0.0982483	-2.42198
P19001	Krt19	Keratin, type I cytoskeletal 19	Krt19	0.0644191	0.29035	0.904037	0.67916	-	-			-0.749023	2.15338	0.0364673	-3.30427	-	+			0.162176	0.191391	0.946095	0.474604	-	-			-0.651276	1.24121	0.27187	-2.12187					-0.586847	1.07432	0.348259	-1.89775	-	-			-0.813447	2.40968	0.0197784	-3.63923		+
P19096	Fasn	Fatty acid synthase	Fasn	0.289745	2.43423	0.486545	3.76705	+	-			0.517521	1.67876	0.0749069	2.69203	-	-			-0.211458	0.35289	0.885179	-0.792026	-	-			0.0163142	0.0248452	0.982623	0.0713531					0.306064	0.667915	0.576128	1.31635	-	-			0.227757	0.601977	0.43765	1.21433
P19137	Lama1	Laminin subunit alpha-1	Lama1	-0.206779	0.279647	0.910193	-0.674301	-	-			1.75063	2.70343	0.0182707	4.15014	+	-			-0.814072	1.0874	0.613159	-1.89966	-	-			1.14334	1.41651	0.21585	2.47641					0.936557	1.55078	0.204461	2.56496	-	-			1.95741	2.17547	0.030481	3.63091	+
P19157	Gstp1	Glutathione S-transferase P 1	Gstp1	0.0979465	0.172248	0.952568	0.436738	-	-			-0.752181	2.2164	0.032805	-3.4646	-	+			0.0418789	0.0495316	0.992563	0.138996	-	-			-0.80827	1.4908	0.197824	-2.52878					-0.710302	1.14082	0.326836	-2.06931	-	-			-0.850149	2.75682	0.0113223	-4.10296		+
P19182	Ifrd1	Interferon-related developmental regulator 1	Ifrd1					-	-							-	-			0.128221	0.0405113	0.990454	0.1191	-	-			NaN	NaN	NaN	NaN			+						-	-			NaN	NaN	NaN	NaN
P19221	F2	Prothrombin	F2	-0.88476	1.23276	0.564039	-2.33161	-	-			0.882212	1.2324	0.160062	2.1653	-	-			-0.657784	0.31665	0.896691	-0.732788	-	-			1.1092	0.421202	0.701643	0.949261					0.224428	0.0718279	0.948223	0.2007	-	-			1.76698	2.31816	0.0237647	3.71514	+
P19246	Nefh	Neurofilament heavy polypeptide	Nefh					-	-			-1.00349	1.88778	0.0544411	-3.30961	-	-			0			0	-	-			NaN	NaN	NaN	NaN									-	-			NaN	NaN	NaN	NaN
P19253	Rpl13a	60S ribosomal protein L13a	Rpl13a	0.728329	0.482229	0.821701	1.03103	-	-			0.933662	0.83887	0.311944	1.58117	-	-			-0.631927	0.984635	0.656197	-1.76141	-	-			-0.426579	0.4288	0.695847	-0.929532					0.301735	0.185711	0.886994	0.464755	-	-			0.205349	0.216461	0.770125	0.528739
P19258	Mpv17	Protein Mpv17	Mpv17					-	-							-	-			0			0	-	-			NaN	NaN	NaN	NaN									-	-			NaN	NaN	NaN	NaN
P19324	Serpinh1	Serpin H1	Serpinh1	0.171776	0.205627	0.941513	0.511473	-	-			0.709278	0.889574	0.288848	1.67153	-	-			-0.844775	0.876419	0.684102	-1.6228	-	-			-0.307284	0.254187	0.82859	-0.607683					-0.135496	0.0902594	0.938333	-0.245373	-	-			0.53751	0.666757	0.392095	1.31459
P19426	Nelfe	Negative elongation factor E	Nelfe	0.190187	0.242802	0.930116	0.589585	-	-			-0.404509	1.23304	0.159898	-2.1662	-	-			0.5912	1.65069	0.426619	2.82411	-	-			-0.00353305	0.00318938	0.993432	-0.00950286					0.186691	0.352738	0.783622	0.830914	-	-			-0.59469	1.40474	0.110357	-2.33702
P19437	Ms4a1	B-lymphocyte antigen CD20	Ms4a1					-	-							-	-			0			0	-	-			NaN	NaN	NaN	NaN									-	-			NaN	NaN	NaN	NaN
P19467	Muc13	Mucin-13	Muc13	-0.661039	0.809857	0.689972	-1.53855	-	-			-0.956694	1.54945	0.0948278	-2.52507	-	-			0.0987655	0.0535165	0.992353	0.148954	-	-			-0.196877	0.101171	0.933233	-0.26996					-0.857929	0.641776	0.590813	-1.27626	-	-			-0.295677	0.264031	0.721171	-0.625401
P19536	Cox5b	Cytochrome c oxidase subunit 5B, mitochondrial	Cox5b	-0.119077	0.0539698	0.978783	-0.15175	-	-			-0.968756	1.16163	0.180112	-2.06496	-	-			0.241655	0.156086	0.960986	0.402164	-	-			-0.60805	0.263001	0.824389	-0.634773					-0.727101	0.665393	0.576705	-1.41552	-	-			-0.849679	0.645083	0.406471	-1.28136
P19639	Gstm3	Glutathione S-transferase Mu 3	Gstm3	0.106519	0.160209	0.952399	0.408527	-	-			-1.93987	1.65393	0.078386	-2.82897	-	-			1.2804	0.740997	0.732029	1.51094	-	-			-0.766009	1.52026	0.1917	-2.62993					-0.659477	1.30355	0.272454	-2.30973	-	-			-2.04638	1.7504	0.0622276	-2.97385
P19783	Cox4i1	Cytochrome c oxidase subunit 4 isoform 1, mitochondrial	Cox4i1	-0.0197207	0.0388226	0.980417	-0.110128	-	-			-0.66172	2.36784	0.027198	-3.58419	-	+			0.0575551	0.0730489	0.986003	0.199537	-	-			-0.584448	1.10114	0.319444	-1.93415					-0.604165	1.39774	0.244668	-2.32788	-	-			-0.642005	1.6578	0.0727813	-2.66502
P19973	Lsp1	Lymphocyte-specific protein 1	Lsp1	-0.225172	0.241193	0.929441	-0.586267	-	-			0.786447	0.948024	0.259183	1.75745	-	-			0.577695	0.657725	0.75462	1.30077	-	-			1.58932	2.45604	0.0766214	3.79767	+				1.36414	1.72804	0.165711	2.94016	-	-			1.01162	1.54865	0.0873057	2.52404
P20040	-	H-2 class II histocompatibility antigen, E-Q beta chain	-					-	-			1.05773	0.909844	0.278544	1.7529	-	-			-0.287341	0.30923	0.899615	-0.718555	-	-			NaN	NaN	NaN	NaN			+		0.770392	0.555055	0.649746	1.19114	-	-			NaN	NaN	NaN	NaN
P20060	Hexb	Beta-hexosaminidase subunit beta	Hexb	-0.386693	0.579412	0.785026	-1.18508	-	-			-1.08282	2.59221	0.0201176	-3.88137	-	+			-0.0681771	0.0778302	0.985012	-0.211653	-	-			-0.764297	1.2117	0.284648	-2.08263					-1.151	2.032	0.126759	-3.14712	-	+			-0.696097	1.51506	0.0920921	-2.48053
P20065	Tmsb4x	Thymosin beta-4	Tmsb4x	0.442115	0.421837	0.843201	0.9213	-	-			0.925259	1.25432	0.15516	2.13925	-	-			0.0539404	0.0368512	0.992479	0.104309	-	-			0.537081	0.437458	0.691327	0.944477					0.979199	0.818182	0.48282	1.53928	-	-			0.483138	0.781293	0.326531	1.48562
P20108	Prdx3	Thioredoxin-dependent peroxide reductase, mitochondrial	Prdx3	-0.209238	0.477089	0.821917	-1.01649	-	-			-0.540578	1.95538	0.0492353	-3.04825	-	-			-0.174529	0.25846	0.916398	-0.612727	-	-			-0.505878	0.859086	0.421587	-1.59809					-0.715106	1.56201	0.203866	-2.54132	-	-			-0.33135	0.754694	0.3417	-1.44653
P20152	Vim	Vimentin	Vim	-0.222721	0.815624	0.686717	-1.54705	-	-			0.374808	1.54426	0.0955069	2.51836	-	-			-0.135202	0.229939	0.926293	-0.555248	-	-			0.462309	1.00842	0.353836	1.8075					0.239606	0.43058	0.732173	0.93261	-	-			0.597539	2.73205	0.0115238	4.0694	+
P20352	F3	Tissue factor	F3	0.162468	0.10312	0.963486	0.278547	-	-			-0.50607	0.370875	0.640818	-0.839201	-	-			0			0	-	-			NaN	NaN	NaN	NaN				+					-	-			-0.668544	0.523953	0.496129	-1.10151
P20444	Prkca	Protein kinase C alpha type	Prkca	-0.416561	0.542762	0.789975	-1.12572	-	-			0.133271	0.625026	0.435398	1.25033	-	-			-0.271557	1.10688	0.603804	-1.96194	-	-			0.278284	0.283132	0.807376	0.667766					-0.138285	0.405157	0.752084	-0.896352	-	-			0.549812	0.876011	0.278548	1.62222
P20491	Fcer1g	High affinity immunoglobulin epsilon receptor subunit gamma	Fcer1g					-	-							-	-			0.492532	0.272414	0.912664	0.646561	-	-			NaN	NaN	NaN	NaN			+						-	-			NaN	NaN	NaN	NaN
P20664	Prim1	DNA primase small subunit	Prim1					-	-							-	-			0			0	-	-			NaN	NaN	NaN	NaN									-	-			NaN	NaN	NaN	NaN
P20801	Tnnc2	Troponin C, skeletal muscle	Tnnc2	-0.345843	0.178356	0.949876	-0.450223	-	-			-0.544084	0.448372	0.57519	-0.963196	-	-			-2.02563	1.94812	0.40435	-3.09905	-	-			-2.22384	1.44441	0.210031	-2.51763					-2.56971	1.95791	0.131148	-3.18937	-	-			-0.19824	0.122858	0.865818	-0.322655
P20918	Plg	Plasminogen	Plg	-0.429299	0.558769	0.790705	-1.15178	-	-			1.18552	2.40078	0.0260208	3.62751	+	-			-0.766673	0.747192	0.730313	-1.42735	-	-			0.848159	0.744005	0.486779	1.43072					0.418851	0.363283	0.776116	0.813425	-	-			1.61483	2.4367	0.0190954	3.67486	+
P21107	Tpm3	Tropomyosin alpha-3 chain	Tpm3	-1.11285	0.854166	0.665305	-1.6035	-	-			0.215907	0.350378	0.657711	0.789874	-	-			-0.103119	0.0864519	0.980891	-0.23325	-	-			1.22562	0.884043	0.410793	1.63363					0.112788	0.0851813	0.940225	0.230546	-	-			1.32875	1.22896	0.151455	2.10559
P21126	Ubl4a	Ubiquitin-like protein 4A	Ubl4a	-0.114478	0.126058	0.962279	-0.330191	-	-			0.180074	0.274114	0.72559	0.647374	-	-			0.134627	0.263692	0.915757	0.626712	-	-			0.429183	0.742894	0.48752	1.4388					0.314702	0.670373	0.577514	1.32825	-	-			0.294566	0.402556	0.601196	0.887272
P21271	Myo5b	Unconventional myosin-Vb	Myo5b	-0.109712	0.154809	0.954961	-0.396382	-	-			-0.331933	0.578639	0.464236	-1.17748	-	-			0.207452	0.260175	0.918092	0.617744	-	-			-0.0147832	0.0149141	0.985365	-0.0433936					-0.124481	0.184019	0.888585	-0.461079	-	-			-0.222243	0.277932	0.70919	-0.652768
P21278	Gna11	Guanine nucleotide-binding protein subunit alpha-11	Gna11	0.142943	0.301964	0.898527	0.701609	-	-			-0.442649	1.62931	0.0808145	-2.62828	-	-			0.0427549	0.0959928	0.975776	0.256789	-	-			-0.542838	1.71105	0.157776	-2.73365					-0.399894	1.20826	0.300617	-2.07805	-	-			-0.585581	2.17954	0.0303185	-3.33825		+
P21279	Gnaq	Guanine nucleotide-binding protein G(q) subunit alpha	Gnaq	0.542678	0.667193	0.740029	1.32333	-	-			0.384746	0.466185	0.558406	0.993467	-	-			-0.377236	0.289671	0.909069	-0.677841	-	-			-0.53515	0.405174	0.716019	-0.896384					0.00751012	0.00362252	0.990375	0.0107035	-	-			-0.157935	0.285068	0.703085	-0.666675
P21300	Akr1b7	Aldose reductase-related protein 1	Akr1b7	-0.240589	0.0824825	0.968216	-0.228262	-	-			0.0720305	0.0274606	0.969714	0.079319	-	-			0			0	-	-			NaN	NaN	NaN	NaN				+					-	-			0.312592	0.181649	0.802586	0.459377
P21447	Abcb1a	Multidrug resistance protein 1A	Abcb1a	-0.504266	0.773055	0.695115	-1.48398	-	-			-1.41439	3.52659	0.00661538	-5.19353	-	+			0.071971	0.0728662	0.985621	0.199464	-	-			-0.83815	1.10949	0.318286	-1.96556					-1.34242	2.34828	0.101774	-3.647	-	+			-0.910119	1.68804	0.0695338	-2.704
P21460	Cst3	Cystatin-C	Cst3	0.388885	0.322635	0.895169	0.744202	-	-			0.233295	0.248918	0.750675	0.597054	-	-			-0.227957	0.219085	0.928082	-0.540104	-	-			-0.38355	0.259109	0.826867	-0.626812					0.00533791	0.0036982	0.990421	0.0110775	-	-			-0.155579	0.134273	0.851416	-0.348488
P21550	Eno3	Beta-enolase	Eno3	-0.462392	0.224292	0.934305	-0.546605	-	-			-1.17118	1.20706	0.167566	-2.07644	-	-			-1.8766	2.26558	0.422667	-3.38426	-	+			-2.58537	2.07943	0.102907	-3.20845		+			-3.04778	3.70189	0.105333	-5.45721	-	+			-0.708752	0.397851	0.604659	-0.875373
P21614	Gc	Vitamin D-binding protein	Gc	0.297143	0.321507	0.895182	0.738867	-	-			0.181872	0.178014	0.818671	0.446753	-	-			0.14671	0.0918243	0.977276	0.249283	-	-			0.0314331	0.0183592	0.984492	0.0537874					0.328583	0.249368	0.842942	0.606766	-	-			-0.115272	0.100445	0.885422	-0.268191
P21619	Lmnb2	Lamin-B2	Lmnb2	-0.457171	1.4083	0.508449	-2.37329	-	-			-0.523665	5.87839	0.00133333	-9.43111	-	+			0.0055948	0.015579	0.998233	0.0451071	-	-			-0.060907	0.106425	0.93377	-0.28269					-0.51807	2.3881	0.102917	-3.61082	-	+			-0.0664925	0.152879	0.831414	-0.390995
P21812	Mcpt4	Mast cell protease 4	Mcpt4	0.133001	0.0593068	0.976019	0.169088	-	-			-0.0925361	0.043044	0.955066	-0.1229	-	-			0			0	-	-			NaN	NaN	NaN	NaN				+					-	-			-0.22554	0.119162	0.868199	-0.319689
P21836	Ache	Acetylcholinesterase	Ache					-	-							-	-		+	0			0	-	-	+		NaN	NaN	NaN	NaN									-	-			NaN	NaN	NaN	NaN
P21844	Cma1	Chymase	Cma1					-	-			-0.32647	0.171855	0.822825	-0.447549	-	-			0			0	-	-			NaN	NaN	NaN	NaN									-	-			NaN	NaN	NaN	NaN
P21956	Mfge8	Lactadherin	Mfge8					-	-	+		0.707581	1.10163	0.198552	2.01116	-	-			0.0234849	0.0229056	0.995328	0.0660696	-	-			NaN	NaN	NaN	NaN			+		0.731066	0.496743	0.689868	1.08738	-	-			NaN	NaN	NaN	NaN
P22005	Penk	Proenkephalin-A	Penk	0.242862	0.0722094	0.970323	0.200462	-	-			-0.0926471	0.0252232	0.97291	-0.0737903	-	-			0.7513	0.264214	0.915705	0.633266	-	-			0.415813	0.142862	0.912216	0.370364					0.658653	0.214842	0.863886	0.531124	-	-			-0.335495	0.109206	0.878065	-0.293476
P22315	Fech	Ferrochelatase, mitochondrial	Fech	0.216334	0.0847959	0.968046	0.231645	-	-			-0.62523	0.367512	0.644243	-0.828091	-	-			0.214063	0.0846424	0.981073	0.230417	-	-			-0.627517	0.232243	0.843071	-0.567706					-0.411167	0.138977	0.916218	-0.367101	-	-			-0.841581	0.519957	0.498761	-1.08289
P22599	Serpina1b	Alpha-1-antitrypsin 1-2	Serpina1b	-0.100775	0.180051	0.948284	-0.452428	-	-			-0.525677	0.607536	0.446491	-1.22305	-	-			0.642141	0.397957	0.873967	0.88892	-	-			0.217233	0.164375	0.896161	0.42313					0.116464	0.101574	0.932218	0.27473	-	-			-0.424895	0.417845	0.587004	-0.910494
P22682	Cbl	E3 ubiquitin-protein ligase CBL	Cbl	-0.0855514	0.0866442	0.967304	-0.240987	-	-			0.958855	2.34768	0.0281188	3.75917	+	-			-0.220385	0.444044	0.854059	-0.965093	-	-			0.824025	1.38116	0.228958	2.72401					0.73847	1.67051	0.177195	3.09123	-	-			1.0444	2.02535	0.0387698	3.39478	+
P22892	Ap1g1	AP-1 complex subunit gamma-1	Ap1g1	0.126591	0.130177	0.962195	0.339838	-	-			0.334394	0.475162	0.549849	1.00859	-	-			-0.359597	0.804586	0.703225	-1.51037	-	-			-0.151774	0.230196	0.844273	-0.557156					-0.0252029	0.0238119	0.984023	-0.0684612	-	-			0.207812	0.436391	0.571841	0.942639
P22907	Hmbs	Porphobilinogen deaminase	Hmbs	0.271063	0.23878	0.9285	0.578586	-	-			0.288685	0.554681	0.483327	1.14514	-	-			0.0364336	0.0626885	0.990845	0.174167	-	-			0.0540506	0.03896	0.973993	0.111199					0.325119	0.579978	0.631533	1.21699	-	-			0.0176502	0.0157895	0.976192	0.0457925
P23116	Eif3a	Eukaryotic translation initiation factor 3 subunit A	Eif3a	0.726741	2.01738	0.412548	3.19284	+	-			0.818339	2.87157	0.0158704	4.25951	+	-			-0.130025	0.412519	0.866926	-0.898104	-	-			-0.0384193	0.0794394	0.944916	-0.216135					0.688315	1.86396	0.1444	2.93048	-	-			0.0915946	0.352165	0.644197	0.793149
P23242	Gja1	Gap junction alpha-1 protein	Gja1					-	-							-	-			0			0	-	-			NaN	NaN	NaN	NaN									-	-			NaN	NaN	NaN	NaN
P23249	Mov10	Putative helicase MOV-10	Mov10	0.0464355	0.0415482	0.981046	0.118275	-	-			0.601384	1.25097	0.155849	2.19155	-	-			-0.115408	0.170363	0.955653	-0.431132	-	-			0.43954	0.580248	0.584967	1.19433					0.485976	0.628936	0.598818	1.29929	-	-			0.554943	1.1141	0.184565	1.9517
P23475	Xrcc6	X-ray repair cross-complementing protein 6	Xrcc6	0.425854	0.616869	0.772272	1.26457	-	-			-0.454561	1.16535	0.178791	-2.04271	-	-			-0.284199	0.342152	0.888921	-0.781046	-	-			-1.16459	1.28448	0.256959	-2.33873					-0.73876	0.835239	0.473376	-1.63465	-	-			-0.880426	2.06859	0.0365313	-3.26242		+
P23492	Pnp	Purine nucleoside phosphorylase	Pnp	-0.530899	1.24426	0.563739	-2.15085	-	-			0.274989	0.957562	0.254987	1.73702	-	-			-0.537023	0.887862	0.674069	-1.62808	-	-			0.268872	0.29353	0.802194	0.683044					-0.262033	0.334532	0.799982	-0.760615	-	-			0.805872	2.11466	0.034096	3.25406	+
P23506	Pcmt1	Protein-L-isoaspartate(D-aspartate) O-methyltransferase	Pcmt1	0.751008	0.919677	0.64022	1.73851	-	-			0.265068	0.387582	0.626979	0.864707	-	-			-0.0557999	0.0623576	0.990557	-0.173303	-	-			-0.54175	0.58787	0.582566	-1.21695					0.209268	0.2509	0.842815	0.614938	-	-			-0.485936	0.69362	0.375973	-1.35536
P23591	Tsta3	GDP-L-fucose synthase	Tsta3	0.0549479	0.0772634	0.971129	0.211136	-	-			-0.489872	1.01831	0.230156	-1.82113	-	-			0.353041	0.454726	0.845619	0.970459	-	-			-0.191774	0.207665	0.862703	-0.51031					-0.136831	0.144115	0.91293	-0.371109	-	-			-0.544817	1.11683	0.184277	-1.95538
P23611	Irf8	Interferon regulatory factor 8	Irf8					-	-							-	-		+	0			0	-	-	+		NaN	NaN	NaN	NaN									-	-			NaN	NaN	NaN	NaN
P23780	Glb1	Beta-galactosidase	Glb1	0.309549	0.440933	0.838012	0.954574	-	-			-0.925361	1.99208	0.0463462	-3.09558	-	-			0.665445	2.12938	0.415833	3.43717	+	-			-0.56945	1.58501	0.181212	-2.72612					-0.259917	0.304881	0.814378	-0.713901	-	-			-1.2349	4.09604	0.00103448	-6.07515		+
P23927	Cryab	Alpha-crystallin B chain	Cryab	-0.174146	0.155539	0.954201	-0.40092	-	-			0.0293292	0.0169568	0.980208	0.0493633	-	-			-0.475611	0.355372	0.884529	-0.805682	-	-			-0.272125	0.265403	0.822715	-0.635665					-0.446282	0.392889	0.763871	-0.896173	-	-			0.203479	0.162663	0.822408	0.412918
P23950	Zfp36l1	mRNA decay activator protein ZFP36L1	Zfp36l1					-	-			1.23017	1.4853	0.104912	2.52107	-	-			-0.397934	0.270291	0.914369	-0.645502	-	-			NaN	NaN	NaN	NaN			+		0.832235	0.480027	0.703982	1.07593	-	-			NaN	NaN	NaN	NaN
P23953	Ces1c	Carboxylesterase 1C	Ces1c	-0.109051	0.0736793	0.970585	-0.205525	-	-			0.020143	0.0163315	0.980153	0.0486343	-	-			0			0	-	-			NaN	NaN	NaN	NaN				+					-	-			0.129175	0.0915661	0.894439	0.249813
P24270	Cat	Catalase	Cat	0.559962	0.986614	0.618067	1.79355	-	-			0.683302	1.83011	0.0593946	2.88691	-	-			-0.137023	0.295341	0.908723	-0.68653	-	-			-0.0136668	0.0168217	0.984982	-0.0488416					0.546279	1.08931	0.343215	1.93753	-	-			0.123359	0.21511	0.771084	0.525921
P24369	Ppib	Peptidyl-prolyl cis-trans isomerase B	Ppib	-0.139623	0.165591	0.95225	-0.420545	-	-			0.503562	0.857178	0.303756	1.59536	-	-			-0.839624	1.58516	0.432857	-2.53887	-	-			-0.19645	0.232014	0.842357	-0.560886					-0.336062	0.359741	0.779091	-0.806986	-	-			0.643179	1.84742	0.0521199	2.90919
P24452	Capg	Macrophage-capping protein	Capg	-0.665795	0.898584	0.650019	-1.68484	-	-			0.902286	1.53671	0.0959791	2.54605	-	-			-0.378101	0.527174	0.802285	-1.09017	-	-			1.18998	1.99879	0.113327	3.10424					0.524185	0.866598	0.455986	1.62159	-	-			1.56808	2.58301	0.0147443	3.86908	+
P24456	Cyp2d10	Cytochrome P450 2D10	Cyp2d10					-	-							-	-			0			0	-	-			NaN	NaN	NaN	NaN									-	-			NaN	NaN	NaN	NaN
P24472	Gsta4	Glutathione S-transferase A4	Gsta4	-0.05736	0.08619	0.967538	-0.23362	-	-			-0.389086	0.659457	0.411047	-1.30343	-	-			0.09342	0.100835	0.975387	0.268597	-	-			-0.238314	0.32155	0.781247	-0.736355					-0.295666	0.448107	0.722317	-0.962743	-	-			-0.331728	0.50086	0.514501	-1.05145
P24527	Lta4h	Leukotriene A-4 hydrolase	Lta4h	0.00148106	0.00334474	0.993601	0.00985857	-	-			-0.406774	1.74161	0.0691399	-2.773	-	-			-0.0187599	0.0392958	0.990729	-0.110949	-	-			-0.427029	1.46293	0.204881	-2.41285					-0.425534	1.33085	0.265931	-2.24024	-	-			-0.408272	2.03716	0.0386174	-3.1538		+
P24547	Impdh2	Inosine-5'-monophosphate dehydrogenase 2	Impdh2	-0.0108417	0.0186754	0.990577	-0.0541146	-	-			0.9132	3.52796	0.00667961	5.19556	+	-			-0.150217	0.239881	0.927142	-0.575483	-	-			0.773824	1.66762	0.165887	2.67768					0.762983	1.81363	0.154007	2.86569	-	-			0.924038	2.9945	0.0075625	4.42932	+
P24549	Aldh1a1	Retinal dehydrogenase 1	Aldh1a1	0.426798	0.805235	0.68814	1.53173	-	-			-0.562325	1.44199	0.112555	-2.3856	-	-			-0.371366	0.580235	0.77764	-1.18001	-	-			-1.3605	2.44762	0.0768381	-3.78584		+			-0.933691	1.82703	0.149848	-2.93579	-	-			-0.989152	2.31494	0.0239805	-3.51482		+
P24668	M6pr	Cation-dependent mannose-6-phosphate receptor	M6pr	-0.858627	1.00824	0.60616	-1.82409	-	-			-0.102734	0.174686	0.821323	-0.439473	-	-			0.0493949	0.0452987	0.992124	0.127119	-	-			0.805291	0.753261	0.48081	1.44441					-0.053339	0.0446766	0.966164	-0.125693	-	-			0.755919	0.970914	0.236307	1.7556
P24788	Cdk11b	Cyclin-dependent kinase 11B	Cdk11b	-0.0481764	0.0573034	0.976484	-0.160602	-	-			0.487508	2.06667	0.0420147	3.34608	+	-			-0.744222	1.26286	0.572843	-2.15056	-	-			-0.208549	0.196114	0.869507	-0.487187					-0.256714	0.227137	0.857853	-0.557039	-	-			0.535674	1.3865	0.113522	2.31319
P25206	Mcm3	DNA replication licensing factor MCM3	Mcm3	0.0325937	0.0752806	0.970728	0.206096	-	-			0.705426	3.07525	0.0124186	4.54213	+	-			-0.163314	0.442308	0.852029	-0.949385	-	-			0.509505	1.80128	0.143354	2.84981					0.542112	1.67284	0.176546	2.6844	-	-			0.672819	3.69038	0.00339785	5.43969	+
P25425	Pou2f1	POU domain, class 2, transcription factor 1	Pou2f1					-	-							-	-			0			0	-	-			NaN	NaN	NaN	NaN									-	-			NaN	NaN	NaN	NaN
P25444	Rps2	40S ribosomal protein S2	Rps2	-0.0111882	0.0164836	0.990743	-0.0478777	-	-			0.29522	0.64022	0.425862	1.27386	-	-			-0.0432322	0.0495368	0.992799	-0.138423	-	-			0.263162	0.357019	0.755064	0.802024					0.251988	0.306815	0.813505	0.708487	-	-			0.306419	0.88915	0.272289	1.64088
P25911	Lyn	Tyrosine-protein kinase Lyn	Lyn	-0.142608	0.256045	0.92446	-0.620527	-	-			0.604286	2.20647	0.0333472	3.45095	+	-			-0.00551077	0.011907	0.999293	-0.0347596	-	-			0.741391	2.05746	0.106111	3.59821	+				0.598775	2.29841	0.0994711	3.82827	+	-			0.746894	2.14734	0.0322804	3.46336	+
P25976	Ubtf	Nucleolar transcription factor 1	Ubtf	0.12241	0.653642	0.744518	1.31198	-	-			0.161351	1.74808	0.0687822	2.82969	-	-			-0.055141	0.178216	0.954072	-0.447193	-	-			-0.0162163	0.0385554	0.973958	-0.1094					0.10621	0.310485	0.812672	0.720968	-	-			0.0389194	0.199556	0.785734	0.493152
P26040	Ezr	Ezrin	Ezr	-0.559527	0.825356	0.687484	-1.56136	-	-			-0.440372	1.78872	0.0641306	-2.83364	-	-			0.246437	0.459071	0.84586	0.977789	-	-			0.365578	0.420944	0.701457	0.915894					-0.193935	0.333177	0.800751	-0.758095	-	-			0.119136	0.133531	0.851917	0.34677
P26041	Msn	Moesin	Msn	-0.546198	1.55788	0.507482	-2.57448	-	-			0.699375	2.37958	0.0265152	3.59962	+	-			-0.348952	0.717833	0.743636	-1.3842	-	-			0.896619	2.12416	0.0967253	3.26637	+				0.350423	0.736387	0.534941	1.41941	-	-			1.24558	3.69995	0.00325275	5.45425	+
P26043	Rdx	Radixin	Rdx	0.0451997	0.0777734	0.970764	0.21243	-	-			0.0945886	0.183548	0.813045	0.458789	-	-			-0.305573	0.617672	0.765679	-1.23303	-	-			-0.256176	0.458415	0.677141	-0.980304					-0.210985	0.360882	0.778341	-0.809062	-	-			0.0494096	0.0885145	0.897482	0.238847
P26150	Hsd3b3	3 beta-hydroxysteroid dehydrogenase/Delta 5-->4-isomerase type 3	Hsd3b3	-0.398431	0.432343	0.841994	-0.950813	-	-			-1.38139	1.63493	0.0802831	-3.02732	-	-			0			0	-	-			NaN	NaN	NaN	NaN				+					-	-			-0.982941	1.06321	0.202494	-1.95401
P26151	Fcgr1	High affinity immunoglobulin gamma Fc receptor I	Fcgr1					-	-							-	-			0			0	-	-			NaN	NaN	NaN	NaN									-	-			NaN	NaN	NaN	NaN
P26231	Ctnna1	Catenin alpha-1	Ctnna1	-0.245208	0.657509	0.745576	-1.30833	-	-			-0.387658	1.52913	0.0972241	-2.49877	-	-			0.174564	0.306003	0.902286	0.704934	-	-			0.0321216	0.0407018	0.973239	0.114973					-0.213094	0.392421	0.764055	-0.865748	-	-			-0.142436	0.301781	0.686649	-0.698881
P26262	Klkb1	Plasma kallikrein	Klkb1					-	-	+		-0.237054	0.27981	0.720597	-0.682872	-	-			0			0	-	-	+		NaN	NaN	NaN	NaN									-	-	+		NaN	NaN	NaN	NaN
P26339	Chga	Chromogranin-A	Chga	-0.273823	0.409948	0.847518	-0.90037	-	-			-0.954892	1.91281	0.0525093	-2.99339	-	-			1.17182	2.15981	0.410133	3.25272	+	-			0.490776	0.698487	0.512911	1.3627					0.216929	0.222149	0.859541	0.54056	-	-			-0.681052	1.5815	0.0824199	-2.56653
P26350	Ptma	Prothymosin alpha	Ptma	0.211409	0.204707	0.940472	0.50551	-	-			-0.842396	1.11938	0.194143	-1.95882	-	-			1.6483	2.17657	0.411256	3.27355	+	-			0.594486	0.568097	0.5926	1.1607					0.805904	0.701184	0.555208	1.36676	-	-			-1.0538	2.18033	0.0303625	-3.33926		+
P26369	U2af2	Splicing factor U2AF 65 kDa subunit	U2af2	-0.239581	0.338076	0.888702	-0.769975	-	-			0.519392	1.69033	0.0744	2.70695	-	-			0.0269006	0.0241839	0.995063	0.0696614	-	-			0.785854	0.839263	0.431847	1.59673					0.546292	0.577266	0.6331	1.18947	-	-			0.758977	2.02635	0.0387315	3.13983	+
P26443	Glud1	Glutamate dehydrogenase 1, mitochondrial	Glud1	-0.0975424	0.354056	0.884142	-0.799582	-	-			-0.235757	1.76495	0.0665093	-2.80304	-	-			-0.186332	0.342766	0.889895	-0.773516	-	-			-0.324552	0.588118	0.582456	-1.1925					-0.422089	0.876225	0.457632	-1.62252	-	-			-0.138224	0.587229	0.448629	-1.19109
P26450	Pik3r1	Phosphatidylinositol 3-kinase regulatory subunit alpha	Pik3r1	0.869194	0.85473	0.666476	1.70164	-	-			0.729077	2.26886	0.0311584	3.53691	+	-			-0.20711	1.80143	0.42214	-2.96631	-	-			-0.347225	0.315452	0.785856	-0.7561					0.521967	0.990019	0.388931	1.87894	-	-			-0.140114	0.165135	0.819298	-0.422626
P26516	Psmd7	26S proteasome non-ATPase regulatory subunit 7	Psmd7	0.563089	0.342722	0.885831	0.79223	-	-			0.404691	0.46797	0.557115	1.00658	-	-			-1.58904	2.20325	0.400195	-3.67518	-	+			-1.74741	1.13623	0.311657	-2.16987					-1.18435	1.64597	0.18136	-3.25397	-	-			-0.158423	0.101913	0.88509	-0.272426
P26618	Pdgfra	Platelet-derived growth factor receptor alpha	Pdgfra					-	-			0.801153	1.24294	0.157085	2.2203	-	-			-0.0262973	0.0212342	0.995546	-0.0617425	-	-			NaN	NaN	NaN	NaN			+		0.774855	0.731732	0.536979	1.59716	-	-			NaN	NaN	NaN	NaN
P26638	Sars	Serine--tRNA ligase, cytoplasmic	Sars	-0.0383259	0.11103	0.96442	-0.294488	-	-			0.0708919	0.334704	0.673097	0.760936	-	-			0.0179716	0.0570709	0.991193	0.158294	-	-			0.127172	0.40084	0.7204	0.880655					0.0888635	0.24992	0.842783	0.597232	-	-			0.109186	0.637621	0.410936	1.26984
P26883	Fkbp1a	Peptidyl-prolyl cis-trans isomerase FKBP1A	Fkbp1a	0.412565	0.575162	0.786776	1.22645	-	-			0.124283	0.10304	0.886331	0.275992	-	-			0			0	-	-			NaN	NaN	NaN	NaN				+					-	-			-0.288261	0.26462	0.720732	-0.631007
P27005	S100a8	Protein S100-A8	S100a8					-	-							-	-			0			0	-	-			NaN	NaN	NaN	NaN									-	-			NaN	NaN	NaN	NaN
P27046	Man2a1	Alpha-mannosidase 2	Man2a1	0.344891	0.657418	0.745261	1.33033	-	-			0.419259	0.973616	0.249033	1.79479	-	-			0.0608534	0.0969322	0.975312	0.260239	-	-			0.135197	0.212488	0.856952	0.523797					0.480112	1.0226	0.373232	1.92995	-	-			0.0743598	0.121946	0.866113	0.3197
P27546	Map4	Microtubule-associated protein 4	Map4	-1.05112	2.26802	0.415385	-3.53575	-	+			-0.0516345	0.226015	0.771341	-0.548552	-	-			-0.486741	1.05158	0.629965	-1.86674	-	-			0.512767	0.644634	0.54734	1.28829					-0.538376	1.10558	0.339792	-1.96014	-	-			0.999488	2.34791	0.0225519	3.55802	+
P27573	Mpz	Myelin protein P0	Mpz	-1.75177	1.52967	0.52299	-2.58334	-	-			-1.47098	1.69349	0.0740931	-2.71102	-	-			1.07857	0.975548	0.648297	1.7976	-	-			1.35936	0.927093	0.394841	1.78009					-0.392409	0.368079	0.774871	-0.834016	-	-			0.280775	0.151047	0.833584	0.38787
P27601	Gna13	Guanine nucleotide-binding protein subunit alpha-13	Gna13	0.253455	0.538861	0.788649	1.11934	-	-			-0.0938697	0.250223	0.74888	-0.59784	-	-			-0.0237062	0.0540279	0.992434	-0.150302	-	-			-0.370995	0.926011	0.394536	-1.69288					-0.117576	0.252496	0.842209	-0.602404	-	-			-0.347324	1.05221	0.205393	-1.86759
P27612	Plaa	Phospholipase A-2-activating protein	Plaa	0.0345039	0.0918063	0.965978	0.247596	-	-			0.23671	1.35184	0.132195	2.2678	-	-			0.015282	0.0280668	0.994681	0.0801773	-	-			0.217474	0.463071	0.672192	0.988199					0.251992	0.566735	0.640244	1.15852	-	-			0.202231	1.03559	0.210534	1.84484
P27641	Xrcc5	X-ray repair cross-complementing protein 5	Xrcc5	-0.0922256	0.19551	0.942767	-0.487565	-	-			-0.379176	1.28555	0.146673	-2.2071	-	-			-0.142979	0.326315	0.895114	-0.747937	-	-			-0.429953	1.14884	0.306568	-2.04676					-0.522154	1.4109	0.237807	-2.46812	-	-			-0.286976	0.910078	0.262902	-1.67046
P27659	Rpl3	60S ribosomal protein L3	Rpl3	0.36064	0.936725	0.630657	1.72261	-	-			0.596435	2.93898	0.0148367	4.35236	+	-			-0.125298	0.299541	0.905533	-0.692646	-	-			0.11049	0.185594	0.875535	0.463218					0.471138	1.36928	0.25113	2.29065	-	-			0.235791	0.651188	0.402057	1.29075
P27661	H2afx	Histone H2AX	H2afx					-	-							-	-			0			0	-	-			NaN	NaN	NaN	NaN									-	-			NaN	NaN	NaN	NaN
P27773	Pdia3	Protein disulfide-isomerase A3	Pdia3	0.299848	1.09899	0.585886	1.95098	-	-			0.32691	1.83637	0.0592046	2.89497	-	-			-0.015249	0.0448719	0.992322	-0.125976	-	-			0.0118326	0.0263635	0.981419	0.0755911					0.311661	1.38397	0.249138	2.30988	-	-			0.0270756	0.0715754	0.91661	0.196167
P27808	Mgat1	Alpha-1,3-mannosyl-glycoprotein 2-beta-N-acetylglucosaminyltransferase	Mgat1	0.220154	0.158547	0.953071	0.409876	-	-			0.967704	1.22014	0.16291	2.31039	-	-			0			0	-	-			NaN	NaN	NaN	NaN				+					-	-			0.74756	0.762795	0.336907	1.51857
P28293	Ctsg	Cathepsin G	Ctsg					-	-							-	-			-0.513545	0.23024	0.927236	-0.563528	-	-			NaN	NaN	NaN	NaN			+						-	-			NaN	NaN	NaN	NaN
P28474	Adh5	Alcohol dehydrogenase class-3	Adh5	-0.463151	0.944078	0.630267	-1.73311	-	-			-0.241266	1.83618	0.05912	-2.89473	-	-			-0.266254	0.783055	0.713096	-1.4882	-	-			-0.0443668	0.0497321	0.965503	-0.139531					-0.507519	1.54118	0.207594	-2.55207	-	-			0.22191	0.42001	0.585485	0.914267
P28481	Col2a1	Collagen alpha-1(II) chain	Col2a1	-0.344496	0.381605	0.864638	-0.874782	-	-			-0.921628	0.688763	0.391448	-1.38056	-	-			-0.751137	0.38845	0.875452	-0.878453	-	-			-1.32829	1.0286	0.348125	-2.06675					-1.67277	1.2495	0.29184	-2.47334	-	-			-0.577159	0.39549	0.606147	-0.884428
P28574	Max	Protein max	Max	0.0631504	0.0639494	0.972798	0.176952	-	-			-0.115187	0.152355	0.842081	-0.389812	-	-			0.694687	0.892193	0.673444	1.64519	-	-			0.516367	0.50588	0.641825	1.06486					0.5795	0.739294	0.531938	1.43338	-	-			-0.178333	0.18587	0.798843	-0.463815
P28650	Adssl1	Adenylosuccinate synthetase isozyme 1	Adssl1	-0.170047	0.0935438	0.965894	-0.252636	-	-			-0.139444	0.0909495	0.900853	-0.244883	-	-			-1.35913	1.47043	0.50119	-2.50019	-	-			-1.32854	1.11653	0.317863	-2.07661					-1.49857	1.06562	0.351551	-1.9576	-	-			0.0305944	0.0222159	0.969827	0.0641277
P28653	Bgn	Biglycan	Bgn	-0.380986	1.02671	0.598358	-1.85006	-	-			0.0390422	0.115966	0.871053	0.305544	-	-			-0.403537	0.635292	0.762585	-1.26011	-	-			0.0165019	0.0151601	0.985891	0.0439976					-0.364495	0.472578	0.70966	-1.00425	-	-			0.42003	1.64046	0.0745735	2.64266
P28656	Nap1l1	Nucleosome assembly protein 1-like 1	Nap1l1	0.105453	0.0520644	0.979594	0.147331	-	-			-0.319583	0.110888	0.876915	-0.296145	-	-			-0.435624	0.122743	0.969176	-0.32621	-	-			-0.860673	0.388391	0.733048	-0.887664					-0.755207	0.620437	0.603821	-1.33431	-	-			-0.425056	0.148487	0.836248	-0.383268
P28659	Celf1	CUGBP Elav-like family member 1	Celf1	0.131211	0.134773	0.963636	0.350537	-	-			0.442131	0.52407	0.507799	1.09502	-	-			-0.520525	0.654621	0.756103	-1.32583	-	-			-0.209609	0.252433	0.830266	-0.609344					-0.0783941	0.0524149	0.962408	-0.147602	-	-			0.3109	0.644742	0.406685	1.28846
P28660	Nckap1	Nck-associated protein 1	Nckap1	-0.00283909	0.00569596	0.992982	-0.016744	-	-			0.21799	0.952329	0.256798	1.72972	-	-			-0.166363	0.784399	0.713366	-1.48136	-	-			0.0544642	0.137904	0.916001	0.356871					0.0516277	0.143292	0.913505	0.369229	-	-			0.220821	0.843945	0.294069	1.5764
P28661	2004-09-01	Septin-4	2004-09-01	0.0313881	0.0271872	0.987093	0.0789026	-	-			-0.250645	0.402864	0.612425	-0.905109	-	-			0			0	-	-			NaN	NaN	NaN	NaN				+					-	-			-0.28204	0.3062	0.683601	-0.716469
P28663	Napb	Beta-soluble NSF attachment protein	Napb					-	-							-	-			0			0	-	-			NaN	NaN	NaN	NaN				+					-	-			NaN	NaN	NaN	NaN
P28665	Mug1	Murinoglobulin-1	Mug1	-0.40408	0.305308	0.89844	-0.714733	-	-			-0.578264	0.417003	0.60073	-0.917475	-	-			0.682159	0.466512	0.840834	1.00407	-	-			0.507967	0.353502	0.756958	0.806816					0.103895	0.0980033	0.93457	0.267572	-	-			-0.174205	0.100786	0.885559	-0.269021
[truncated: 4,758 more rows]
[truncated: 59 more columns]

## Sheet: 01b_Upregulated pairwise
Protein.Group	Genes	First.Protein.Description	Gene	FC (lg2) MNP vs Ctrl	p-value MNP vs Ctrl	q-Value MNP vs Ctrl		Protein.Group	Genes	First.Protein.Description	Gene	FC (lg2) DSS vs Ctrl	p-Value DSS vs Ctrl	q-Value DSS vs Ctrl		Protein.Group	Genes	First.Protein.Description	Gene	FC (lg2) DSS+MNP vs DSS	p-Value DSS+MNP vs DSS	q-Value DSS+MNP vs DSS		Protein.Group	Genes	First.Protein.Description	Gene	FC (lg2) DSSMNP vs MNP	p-value DSSMNP vs MNP	q-value DSSMNP vs MNP	T-test Test stat DSSMNP vs MNP		Protein.Group	Genes	First.Protein.Description	Gene	FC (lg2) DSSMNP vs Ctrl	p-Value DSSMNP vs Ctrl	q-Value DSSMNP vs Ctrl		Protein.Group	Genes	First.Protein.Description	Gene	FC (lg2) DSS vs MNP	p-value DSS vs MNP	q-value DSS vs MNP	T-test Test stat DSS vs MNP
[truncated: 345 more rows]

[truncated: 14 more sheets: 01c_ Downregulated pairwise, 02_MNP vs Ctrl, 03_DSS vs Ctrl, 04_DSS+MNP vs DSS, 05 DSS+MNP vs MNP, 06_DSS+MNP vs Ctrl, 07-DSS vs MNP, 08a_Venn(4) significant UP, 08b_Venn(4) significant DOWN, 09a_Venn(3)Up, 09b_Venn(3)Down, 10_Heatmap sigM1, 11_Heatmap sigM2, 12_CellTypes-individual samples]
