# Supplementary material for: Polystyrene micro- and nanoplastics in a colitis mouse model – effects on biodistribution, macrophage polarization, and gut microbiome
Source: Research Square preprint supplement (doi:10.21203/rs.3.rs-7175706/v1), 2025-08-29
Supplement: Supplementary file 4 [file cf81e7352f1faf8f34b527fa.xlsx]

## Sheet: Description
	Supplementary data 3
	Synergistic-antagonistic effect of MNP on DSS-induced colitis, 2-way Anova analysis
	sheet 01	Pairwise comparison on 487 proteins with signifcant interaction (-/+ MNP, -/+ DSS, 2w-ANOVA)-->Volcano Figure 5F and Supl. Figure 4A
	sheet 02	Pairwise comparison on 487 proteins with signifcant interaction (-/+ MNP, -/+ DSS, 2w-ANOVA)-->Volcano Figure 5F, significant proteins
	sheet 03	Enrichment analysis based on ranks (Webgestalt) on Pathway (KEGG, Panther), Cell Type, GOBP, Transcrition factor sites -->Figure 5G,H and Supl. Figure 4C,D

## Sheet: 01_2wAnova-487proteins
Protein.Group	Genes	First.Protein.Description	T: Gene	Gene	FC (lg2) DSS+MNP vs DSS	(-)log ANOVA p value DSS+MNP vs DSS	ANOVA q-value DSS+MNP vs DSS	T-test statistic (rank) DSS+MNP vs DSS	(-)log Two-way ANOVA p value MNP-noMNP	(-)log Two-way ANOVA p value Colitis-noColitis	(-)log Two-way ANOVA p value Interaction	Significant DSS9+MNP vs DSS (Post-hoc Tukey´s HSD corrected)	sig. higher DSS+MNP vs DSS	sig. lower DSS+MNP vs DSS	Valid values DSS+MNP	Valid values DSS	Mean DSS+MNP	Mean DSS	Median DSS+MNP	Median DSS	stdev DSS+MNP	stdev DSS	Coefficient of variation DSS+MNP	Coefficient of variation DSS	Q1_poolCo-DSS_G4	E1_CoPool-DSS	E1_Co_DSS-m03	E1_Co_DSS_m04	E1_Co_DSS-m05	E1_Co_DSS-m06	E1_Co_DSS-m08	Q1_poolCo_DSSMNP_G5	E1_CoPool_DSSMNP	E1_Co_DSSMNP-m07	E1_Co_DSSMNP-m09	E1_Co_DSSMNP-m10	E1_Co_DSSMNP-m11	E1_Co_DSSMNP-m12	ALL M1	ALL M2	Only in vivo M1	Only in vitro M1	Shared in vivo M1and in vitro M1	Only in vivo M2	Only in vitro M2	Shared in vivo and in vitro M2	Shared in vivo M2 and in vitro M1	Shared in vivo M1 and in vitro M2	BM_M1 signature
F2Z3U3	Raph1	Ras association (RalGDS/AF-6) and pleckstrin homology domains 1	Raph1	Raph1	1.57005	1.60897	0.0774667	2.69472	0.562283	0.236304	1.83446	+	+		5	6	23.7458	22.1758	24.0792	22.2086	1.35496	0.444698	0.0570609	0.0200533	NaN	21.5394	22.4095	22.8253	21.863	22.1482	22.2691	NaN	25.1195	NaN	22.064	22.6114	24.0792	24.8549
O35887	Calu	Calumenin	Calu	Calu	0.795571	1.786	0.0651692	2.78922	0.959252	0.157275	1.41432	+	+		7	7	23.2967	22.5011	23.1974	22.3952	0.645039	0.391689	0.027688	0.0174075	22.6142	22.3952	22.0652	23.083	22.1099	22.3147	22.9255	23.1974	23.0516	23.7744	22.3606	22.7114	23.9003	24.081
P01631	-	Ig kappa chain V-II region 26-10	-	KV2A7	1.1107	1.67109	0.0735802	2.68215	0.168949	0.162769	1.94504	+	+		6	7	21.1384	20.0277	21.3228	20.0057	0.841107	0.652813	0.0397905	0.0325955	19.1643	20.05	19.8209	21.3371	20.0187	20.0057	19.7971	19.9058	21.6692	20.9763	NaN	20.4401	21.8857	21.9532
P01723;P01727	-	Ig lambda-1 chain V region		LV1A	1.0487	1.33808	0.103735	2.24973	0.940673	0.310666	4.64803	+	+		6	7	20.5109	19.4622	20.5585	19.402	0.897456	0.784755	0.0437551	0.040322	19.6979	19.402	18.8964	20.9328	18.6689	19.8099	18.8275	20.7207	20.3963	NaN	19.1314	20.9045	20.0858	21.8267
P01869	Ighg1	Ig gamma-1 chain C region, membrane-bound form	Ighg1	Ighg1	2.20026	1.78184	0.0644242	3.02134	0.486579	0.179138	2.29144	+	+		5	5	19.9557	17.7554	20.342	17.5515	0.969327	1.30846	0.048574	0.0736935	NaN	18.6659	16.2275	19.4518	17.5515	16.8805	NaN	NaN	20.342	20.7217	NaN	18.7175	20.8605	19.1368
P15535	B4galt1	Beta-1,4-galactosyltransferase 1	B4galt1	B4galt1	1.43446	1.53436	0.086	2.73287	1.25911	0.0150817	1.72976	+	+		2	7	18.5511	17.1167	18.5511	17.0789	0.874621	0.610337	0.0471464	0.0356574	18.2374	16.1817	17.2354	17.0789	16.8324	17.1902	17.0608	19.1696	NaN	NaN	NaN	17.9327	NaN	NaN
P16014	Chgb	Secretogranin-1	Chgb	Chgb	1.23295	2.80899	0.042	4.17391	1.06221	0.891444	2.2741	+	+		6	7	20.7188	19.4859	20.7889	19.3367	0.529997	0.531742	0.0255805	0.0272886	19.8301	19.1264	19.236	19.8972	19.3367	20.2603	18.7144	21.4958	20.3415	NaN	19.9513	20.851	20.9464	20.7269
P26339	Chga	Chromogranin-A	Chga	Chga	1.17183	2.15975	0.0490588	3.25265	1.32745	0.461948	2.1857	+	+		7	7	21.7322	20.5604	21.9348	20.5615	0.793645	0.527905	0.0365193	0.0256758	20.8218	20.5615	20.2937	20.9956	20.07	21.3321	19.8482	21.5562	21.4685	22.4156	20.1656	21.9348	22.5029	22.0821
P26350	Ptma	Prothymosin alpha	Ptma	Ptma	1.64829	2.17654	0.050125	3.27351	2.13536	0.146041	1.36712	+	+		7	7	23.3586	21.7103	23.6029	21.5874	1.17018	0.636723	0.0500964	0.0293282	21.6649	21.2384	21.3578	22.8753	22.2142	21.5874	21.0341	23.6029	24.0814	21.4488	22.7078	22.5751	24.2978	24.7963
P29391	Ftl1	Ferritin light chain 1	Ftl1	Ftl1	0.611943	2.17201	0.0490909	3.26788	0.857363	0.630101	1.98428	+	+		7	7	23.9458	23.3338	23.7542	23.3465	0.376614	0.32191	0.0157278	0.0137959	23.3484	23.3465	23.0222	23.9566	23.4627	23.1734	23.0271	23.9475	23.7182	24.1391	23.7542	23.6619	23.6921	24.7075
P31809	Ceacam1	Carcinoembryonic antigen-related cell adhesion molecule 1	Ceacam1	Ceacam1	2.02481	2.36415	0.0491111	3.66909	2.71576	2.62349	1.92099	+	+		5	7	21.1129	19.0881	21.4568	18.9981	0.965827	0.926575	0.0457458	0.048542	19.1605	19.0582	18.9981	20.965	18.6027	18.9038	17.9285	20.6473	NaN	NaN	19.7175	21.4568	21.4854	22.2576
P46414	Cdkn1b	Cyclin-dependent kinase inhibitor 1B	Cdkn1b	Cdkn1b	0.854562	2.18159	0.0512258	3.34091	0.26141	0.486151	2.13119	+	+		6	7	20.2133	19.3588	20.2587	19.2584	0.409194	0.497993	0.0202438	0.0257244	19.2584	19.8333	18.8259	20.2117	19.0912	18.9471	19.3438	19.64	20.2267	NaN	19.9491	20.3096	20.2907	20.8639
P63254	Crip1	Cysteine-rich protein 1	Crip1	Crip1	0.619971	1.85534	0.0632281	2.87526	0.21394	3.61907	2.36448	+	+		7	7	25.772	25.1521	25.8711	25.2543	0.423378	0.382365	0.0164278	0.0152021	25.3834	25.1074	25.2543	25.5435	24.8073	25.4756	24.4929	25.9835	25.6492	25.2863	25.2045	26.0134	26.3962	25.8711		+				+
P68254	Ywhaq	14-3-3 protein theta	Ywhaq	Ywhaq	0.679521	1.67456	0.074	2.68662	0.100811	0.250178	1.54736	+	+		6	7	22.2175	21.538	22.239	21.5763	0.313183	0.54514	0.0140962	0.0253106	21.4836	21.8672	21.1568	22.2325	20.5743	21.8755	21.5763	21.9718	22.1757	NaN	21.7642	22.3023	22.5341	22.5572											+
P70670	Naca	Nascent polypeptide-associated complex subunit alpha, muscle-specific form	Naca	Naca	1.068	1.40863	0.0975082	2.37374	0.304237	0.908321	1.79452	+	+		5	7	22.2404	21.1724	22.3692	21.0467	0.83872	0.717681	0.0377115	0.0338969	22.3678	21.0467	20.7388	21.9043	20.3129	21.0827	20.7539	21.7485	22.9045	NaN	NaN	21.0729	23.1071	22.3692
P97352	S100a13	Protein S100-A13	S100a13	S100a13	0.942822	1.4303	0.0944274	2.37037	0.00226429	0.176926	3.50024	+	+		6	7	22.7762	21.8333	22.9544	21.7091	0.901197	0.510176	0.0395676	0.0233669	21.4521	21.6745	21.1987	22.789	21.7091	21.986	22.0239	22.6461	23.6433	NaN	21.4712	21.9955	23.2628	23.638
Q08652	Rbp2	Retinol-binding protein 2	Rbp2	Rbp2	0.85975	1.3205	0.108204	2.22663	0.0825259	1.08191	2.05236	+	+		6	7	21.0705	20.2107	21.0001	20.328	0.74741	0.646185	0.0354719	0.0319724	20.1078	20.5741	19.8737	21.0876	20.4748	20.328	19.0289	21.1075	19.9296	NaN	20.752	20.8928	22.0671	21.6737
Q1RME4	Gm1123	CAR-like soluble protein	Gm1123	Gm1123	1.32337	2.23274	0.0517037	3.58862	0.137459	4.23668	4.51864	+	+		6	5	20.979	19.6556	21.1445	19.5434	0.708641	0.454718	0.0337786	0.0231342	19.1229	19.3774	20.0004	19.5434	NaN	20.2339	NaN	20.1546	21.4085	NaN	20.1533	20.8804	21.8451	21.4319
Q61133	Gstt2	Glutathione S-transferase theta-2	Gstt2	Gstt2	0.827428	1.31216	0.109855	2.24324	0.911445	2.48504	1.63077	+	+		5	7	20.5117	19.6843	20.5679	19.7207	0.524553	0.691326	0.0255734	0.0351207	20.8138	20.1644	19.7207	18.6884	19.1293	19.8034	19.4699	21.1083	20.8151	NaN	20.5679	20.3437	NaN	19.7235
Q62241	Snrpc	U1 small nuclear ribonucleoprotein C	Snrpc	Snrpc	1.04914	1.38437	0.0969922	2.31041	0.195098	1.68602	2.48877	+	+		6	7	21.8153	20.7662	21.875	20.6797	0.798986	0.830272	0.0366249	0.0399819	21.0315	20.6797	19.7701	22.3933	20.1628	20.7919	20.5342	21.9501	21.7999	NaN	20.5147	21.4007	22.748	22.4787
Q6IFX2	Krt42	Keratin, type I cytoskeletal 42	Krt42	Krt42	1.04929	1.38973	0.0974173	2.29227	0.174277	0.221418	1.73305	+	+		7	7	23.3863	22.337	23.0181	22.3844	1.1019	0.502555	0.0471172	0.0224988	22.534	22.3432	21.7205	23.1336	22.3844	22.5501	21.6934	23.1703	22.8216	23.0181	22.7084	22.2667	25.4637	24.2554
Q811U4	Mfn1	Mitofusin-1	Mfn1	Mfn1	0.980883	2.02815	0.0527442	3.54772	1.15248	0.934404	1.5098	+	+		3	6	20.0193	19.0384	20.0001	19.0189	0.514469	0.32889	0.0256987	0.017275	19.4426	19.3773	18.9597	NaN	18.7457	19.0781	18.6271	NaN	NaN	20.5431	20.0001	19.5147	NaN	NaN
Q8BP01	Vmac	Vimentin-type intermediate filament-associated coiled-coil protein	Vmac	Vmac	1.04548	2.2486	0.0512	3.74785	0.760867	0.185438	1.37689	+	+		4	6	20.605	19.5596	20.5398	19.6341	0.567544	0.324886	0.0275439	0.0166101	NaN	19.0543	19.324	19.9365	19.5402	19.7743	19.7281	NaN	NaN	20.89	NaN	20.077	21.2636	20.1896
Q8BYU6	Tor1aip2	Torsin-1A-interacting protein 2	Tor1aip2	Tor1aip2	1.16809	2.84735	0.052	4.22633	3.55594	0.599275	1.46859	+	+		6	7	20.5791	19.411	20.6088	19.4503	0.643345	0.327933	0.031262	0.0168942	19.4864	19.5449	19.4397	19.9104	18.8379	19.2075	19.4503	19.7853	20.7231	NaN	20.0885	20.548	21.6602	20.6695
Q8CDN6	Txnl1	Thioredoxin-like protein 1	Txnl1	Txnl1	0.497595	2.39994	0.0489412	3.62641	1.45184	0.573496	1.51273	+	+		6	7	21.7801	21.2825	21.6848	21.1896	0.299708	0.191479	0.0137607	0.00899703	21.6156	21.1488	21.174	21.4967	21.1896	21.2103	21.1423	21.7909	22.213	NaN	21.5655	21.4706	22.0616	21.5788											+
Q8VCZ6	Sgsm3	Small G protein signaling modulator 3	Sgsm3	Sgsm3	0.772625	1.34658	0.1024	2.32627	1.04442	1.91936	1.35238	+	+		4	7	19.5034	18.7308	19.5399	18.8039	0.662582	0.449085	0.0339726	0.0239758	19.1207	18.9341	19.2458	18.8039	17.9378	18.6814	18.3919	19.4486	19.6311	NaN	18.6623	20.2717	NaN	NaN
Q8VEK3	Hnrnpu	Heterogeneous nuclear ribonucleoprotein U	Hnrnpu	Hnrnpu	0.262643	1.77653	0.0639403	2.77746	0.315891	1.60014	1.60659	+	+		7	7	24.1108	23.8482	24.0916	23.8723	0.182889	0.170721	0.00758534	0.00715867	23.9528	23.8723	23.6138	24.1321	23.7622	23.7122	23.892	24.3386	24.2216	24.0916	24.0126	23.798	24.0462	24.2673
Q91VW3	Sh3bgrl3	SH3 domain-binding glutamic acid-rich-like protein 3	Sh3bgrl3	Sh3bgrl3	0.9549	1.45881	0.0911786	2.37991	0.421068	1.72668	1.91965	+	+		7	7	24.9151	23.9602	25.0761	23.8443	0.876072	0.599515	0.0351623	0.0250213	23.8443	23.9857	23.7019	25.23	23.6755	23.3422	23.9418	25.0761	25.6422	23.5328	24.9478	23.8968	25.7131	25.5969
Q9CQK7	Rwdd1	RWD domain-containing protein 1	Rwdd1	Rwdd1	0.6569	1.36692	0.0980597	2.40319	0.027687	0.858341	1.38936	+	+		3	7	18.9827	18.3258	18.9056	18.522	0.263354	0.431381	0.0138734	0.0235395	18.1127	17.6515	17.9383	18.5266	18.7322	18.7973	18.522	18.9056	NaN	NaN	NaN	18.7665	NaN	19.276
Q9CY45	Eef1akmt1	EEF1A lysine methyltransferase 1	Eef1akmt1	Eef1akmt1	0.704335	1.55184	0.0830103	2.61446	0.169722	0.677249	2.03739	+	+		4	7	19.6799	18.9756	19.9647	19.0129	0.615229	0.296406	0.0312617	0.0156204	18.646	19.2477	18.5961	19.0948	19.0129	19.3856	18.8462	18.7587	NaN	NaN	NaN	19.9433	20.0318	19.986
Q9D7P9	Serpinb12	Serpin B12	Serpinb12	Serpinb12	1.22842	2.09816	0.0513846	3.66878	1.33354	0.840418	1.31956	+	+		3	6	19.5867	18.3583	19.6835	18.5671	0.41833	0.493873	0.0213578	0.0269019	NaN	18.3521	18.6568	18.6323	18.5717	17.3744	18.5626	19.1285	NaN	NaN	19.9482	NaN	NaN	19.6835
Q9DB42	Znf593	Zinc finger protein 593	Znf593	Znf593	1.47382	1.5699	0.0806737	2.91168	0.827158	0.129005	1.75147	+	+		2	6	20.1072	18.6334	20.1072	18.859	0.686176	0.605818	0.0341259	0.0325125	18.8529	NaN	17.5808	19.1314	18.2538	19.1162	18.8652	20.5924	NaN	NaN	NaN	NaN	NaN	19.622
Q9NYQ2	Hao2	Hydroxyacid oxidase 2	Hao2	Hao2	2.06442	1.4045	0.0978537	2.52709	1.05005	1.9781	1.69924	+	+		3	6	21.5318	19.4674	21.3881	19.8999	0.524291	1.32613	0.0243496	0.0681206	20.9585	19.9244	19.8754	18.6052	17.2482	20.1928	NaN	21.3881	NaN	NaN	NaN	21.0944	22.113	NaN
Q9QWI6	Srcin1	SRC kinase signaling inhibitor 1	Srcin1	Srcin1	1.91797	1.44892	0.092177	2.42803	0.681041	0.256507	1.56857	+	+		6	6	21.986	20.068	21.7868	19.5409	1.46273	1.26662	0.0665302	0.0631162	NaN	19.5522	18.8172	22.315	19.4449	19.5296	20.7491	21.6408	NaN	23.1416	19.819	21.3583	24.0233	21.9328
A2ASS6	Ttn	Titin	Ttn	Ttn	-1.74059	2.22347	0.0501429	-3.33185	0.937565	2.68359	1.93468	+		+	7	7	21.1248	22.8653	20.6792	23.3158	0.939408	1.01385	0.0444695	0.0443399	23.3158	23.434	24.114	21.7438	23.4023	22.7718	21.2757	20.8397	20.6156	22.7559	20.6792	20.3137	22.156	20.5132
B2RXC2	Itpkb	Kinase	Itpkb	Itpkb	-1.04108	2.09441	0.0502	-3.50278	1.19221	1.33438	2.59148	+		+	4	6	17.9426	18.9836	17.9306	19.0112	0.677587	0.252472	0.0377642	0.0132995	18.5212	18.9433	18.9951	NaN	19.1845	19.0274	19.2303	NaN	17.1347	NaN	18.058	17.8031	NaN	18.7744
B2RXR6	Ankrd44	Serine/threonine-protein phosphatase 6 regulatory ankyrin repeat subunit B	Ankrd44	Ankrd44	-1.21114	2.90151	0.0613333	-5.70495	0.547705	0.383404	2.04376	+		+	3	5	16.7126	17.9237	16.8074	17.9646	0.292364	0.289863	0.0174936	0.016172	18.2028	NaN	17.9646	NaN	18.1637	17.4985	17.7891	NaN	NaN	NaN	16.9458	16.3846	NaN	16.8074
D3YU50	Mybpc1	Myosin-binding protein C, slow-type	Mybpc1	Mybpc1	-2.24065	2.64321	0.056	-4.06344	1.05595	2.47513	2.16777	+		+	5	7	19.8212	22.0619	19.9036	22.186	0.999777	0.900947	0.0504397	0.0408373	22.6693	22.6197	23.1154	20.9459	22.186	22.1787	20.7181	20.1165	18.2811	19.9036	19.748	NaN	21.0569	NaN
E9PWR4	Dip2c	Disco-interacting protein 2 homolog C	Dip2c	Dip2c	-0.703467	1.5619	0.0818333	-2.77686	1.05363	0.970763	1.34954	+		+	3	6	18.0214	18.7248	17.8559	18.7051	0.504768	0.278889	0.0280094	0.0148941	18.8784	18.5409	18.3581	NaN	18.7581	18.6521	19.1614	NaN	NaN	NaN	17.6201	17.8559	NaN	18.5881		+					+
E9Q7E2	Arid2	AT-rich interactive domain-containing protein 2	Arid2	Arid2	-0.506408	1.41921	0.0940496	-2.79789	2.93818	1.46979	1.64794	+		+	3	4	17.0995	17.6059	17.02	17.6578	0.270308	0.211869	0.015808	0.012034	NaN	NaN	17.768	NaN	17.7771	17.5476	17.3308	NaN	NaN	NaN	17.02	17.4006	NaN	16.8778
F8VPN4	Agl	Amylo-1,6-glucosidase, 4-alpha-glucanotransferase	Agl	Agl	-0.997057	1.53359	0.0852929	-2.47416	0.689284	2.50422	1.51711	+		+	7	7	20.7579	21.755	21.0398	21.7305	0.8613	0.628454	0.0414926	0.0288878	22.0111	22.0495	22.8295	20.9825	21.7305	21.5883	21.0934	21.2786	19.1876	21.6596	21.0398	20.44	21.443	20.2568
O08638	Myh11	Myosin-11	Myh11	Myh11	-0.535314	1.38813	0.0968438	-2.29024	0.730139	1.55729	1.38149	+		+	7	7	27.1555	27.6908	27.3926	27.6974	0.535318	0.309623	0.0197131	0.0111814	28.0622	27.79	27.6974	27.1119	27.9623	27.5605	27.6513	27.8617	27.3926	26.2103	27.4012	26.7823	27.0426	27.3977
O35678	Mgll	Monoglyceride lipase	Mgll	Mgll	-1.67347	2.63052	0.0505	-4.04524	1.42697	0.0458033	2.93264	+		+	5	7	20.1798	21.8533	20.2477	22.1031	0.61661	0.760561	0.0305558	0.0348031	22.1798	22.1062	22.1031	21.394	22.866	21.8848	20.439	20.9696	20.5505	NaN	19.5819	19.5493	NaN	20.2477		+					+
O54865	Gucy1b1	Guanylate cyclase soluble subunit beta-1	Gucy1b1	Gucy1b1	-1.24972	2.97112	0.068	-4.73342	0.0406057	1.19617	2.67542	+		+	4	7	17.8884	19.1381	17.7843	19.1718	0.556173	0.333899	0.0310912	0.0174468	19.1718	19.5878	19.0396	19.3001	18.6438	18.8087	19.4152	18.6055	NaN	NaN	18.0424	17.3797	NaN	17.5261
O70583	Mid1	E3 ubiquitin-protein ligase Midline-1	Mid1	Mid1	-1.05528	1.46297	0.0907027	-2.88373	0.475705	0.291016	1.94139	+		+	2	5	16.8601	17.9154	16.8601	18.0896	0.558332	0.401495	0.0331156	0.0224106	NaN	17.3444	18.3545	NaN	18.0896	17.6766	18.1118	NaN	NaN	NaN	NaN	17.2549	NaN	16.4653
O88587	Comt	Catechol O-methyltransferase	Comt	Comt	-1.25673	1.58649	0.0784681	-2.61288	0.132143	0.313727	1.56605	+		+	5	7	19.9629	21.2196	20.2974	21.4365	0.92499	0.744414	0.0463355	0.0350814	19.8209	21.6028	21.4365	20.8345	21.5675	22.1648	21.1104	18.5164	19.6057	NaN	20.6223	20.7727	NaN	20.2974
P04247	Mb	Myoglobin	Mb	Mb	-1.98007	1.63648	0.0774118	-2.67995	0.323002	2.93295	2.11765	+		+	5	7	19.8896	21.8697	19.8326	22.4935	0.454129	1.58624	0.0228325	0.0725317	22.5508	22.8406	23.4485	20.2283	22.4935	22.446	19.08	20.5835	19.8326	19.6688	20.0016	NaN	19.3615	NaN
P05202	Got2	Aspartate aminotransferase, mitochondrial	Got2	Got2	-0.548986	1.8896	0.0577455	-2.91773	0.662936	1.37542	1.96371	+		+	7	7	23.7559	24.3049	23.5975	24.2478	0.435166	0.241756	0.0183182	0.0099468	24.2836	24.4817	24.7356	24.2361	24.1734	24.2478	23.976	24.0569	23.2362	23.8086	24.5511	23.5975	23.5679	23.4731
P08226	Apoe	Apolipoprotein E	Apoe	Apoe	-0.795643	1.82155	0.0640656	-2.83336	0.550902	4.14675	1.82896	+		+	7	7	21.1077	21.9033	21.0052	21.813	0.6018	0.435693	0.0285109	0.0198916	21.813	22.0934	21.7304	21.5948	22.6604	21.3119	22.1193	21.3642	20.6741	21.0052	21.0856	20.4387	20.8895	22.2964
P08556	Nras	GTPase NRas	Nras	Nras	-0.768186	1.69785	0.0706667	-2.89478	0.85142	0.207316	1.52733	+		+	3	7	17.5326	18.3008	17.6125	18.2811	0.238413	0.422174	0.0135982	0.0230686	18.9676	18.005	18.077	17.6988	18.615	18.461	18.2811	17.7208	NaN	NaN	NaN	17.6125	NaN	17.2645
P11531	Dmd	Dystrophin	Dmd	Dmd	-0.529929	1.62973	0.0762759	-2.59463	1.23359	2.73352	1.30283	+		+	7	7	20.0833	20.6132	20.1078	20.7	0.359614	0.403333	0.0179061	0.0195667	20.6949	20.7	20.9346	19.7376	20.7906	20.8565	20.5783	20.0689	20.1078	20.3895	20.4477	19.4475	19.7931	20.3285
P13542	Myh8	Myosin-8	Myh8	Myh8	-1.74824	2.41585	0.0512	-3.57198	1.22145	4.11762	2.18039	+		+	7	7	23.6052	25.3535	23.6655	25.4655	1.02013	0.79758	0.0432164	0.0314584	25.9812	25.8551	26.4616	24.816	24.4467	25.4655	24.4482	23.7799	23.4819	23.6655	24.1129	22.1569	25.3418	22.6977
P26450	Pik3r1	Phosphatidylinositol 3-kinase regulatory subunit alpha	Pik3r1	Pik3r1	-0.207111	1.80163	0.0652698	-2.9666	0.568557	0.859032	1.5949	+		+	4	7	18.9993	19.2064	19.0115	19.2164	0.11013	0.112007	0.00579654	0.00583176	19.0535	19.2254	19.0889	19.3535	19.2164	19.1775	19.3295	18.8668	NaN	NaN	19.1073	18.9529	NaN	19.0701
P26516	Psmd7	26S proteasome non-ATPase regulatory subunit 7	Psmd7	Psmd7	-1.58899	2.20321	0.0513333	-3.67511	0.405249	0.464062	1.7324	+		+	3	7	18.6983	20.2873	18.5325	20.3959	0.378528	0.689689	0.020244	0.0339962	19.5804	20.5389	20.9628	19.5767	19.689	21.2671	20.3959	18.5325	NaN	NaN	NaN	19.1314	NaN	18.4309
P29758	Oat	Ornithine aminotransferase, mitochondrial	Oat	Oat	-0.564674	1.70661	0.0712632	-2.72792	0.0877013	3.7536	2.71362	+		+	6	7	21.9803	22.545	22.0272	22.4946	0.518136	0.173415	0.0235727	0.00769199	22.6008	22.7761	22.7253	22.4946	22.461	22.2637	22.4932	22.1309	21.9235	21.1239	NaN	22.3414	21.7497	22.6123
P40336	Vps26a	Vacuolar protein sorting-associated protein 26A	Vps26a	Vps26a	-0.751043	1.59876	0.0776087	-2.68037	0.122259	0.0135769	1.3462	+		+	4	7	19.7254	20.4764	20.0525	20.4488	0.696148	0.23972	0.0352919	0.0117071	20.4488	20.7082	20.8753	20.2548	20.3527	20.218	20.4773	20.0537	NaN	NaN	18.6821	20.0513	NaN	20.1145
P42227	Stat3	Signal transducer and activator of transcription 3	Stat3	Stat3	-0.520043	1.62634	0.0752809	-2.59039	0.176577	2.54936	1.64735	+		+	7	7	20.5776	21.0976	20.7235	21.1037	0.50056	0.177671	0.0243255	0.00842137	21.1037	21.0216	21.2446	20.823	21.3259	20.9519	21.2126	20.978	20.4283	20.7235	20.9776	20.6824	19.5259	20.7273
P47857	Pfkm	ATP-dependent 6-phosphofructokinase, muscle type	Pfkm	Pfkm	-1.50868	2.10917	0.052973	-3.24694	0.663189	2.28199	1.91773	+		+	6	7	19.8432	21.3519	19.7586	21.1638	0.724369	0.917342	0.0365046	0.042963	22.0476	21.8365	22.7168	20.5409	21.1169	21.1638	20.0408	20.9412	NaN	20.3031	19.7484	18.8114	19.4864	19.7688
P48453	Ppp3cb	Serine/threonine-protein phosphatase 2B catalytic subunit beta isoform	Ppp3cb	Ppp3cb	-0.614843	1.39306	0.0974286	-2.39159	0.0469962	0.151809	1.65659	+		+	4	7	18.901	19.5158	19.0091	19.5023	0.367637	0.429857	0.0194507	0.0220261	20.0711	19.4223	19.7427	18.7414	19.8256	19.5023	19.3055	19.203	NaN	NaN	18.3827	18.9037	NaN	19.1146
P59672	Anks1a	Ankyrin repeat and SAM domain-containing protein 1A	Anks1a	Anks1a	-0.573309	1.42744	0.0941017	-2.49255	0.038379	0.650433	1.46783	+		+	4	6	17.3685	17.9418	17.3047	17.8665	0.282158	0.394187	0.0162454	0.0219702	17.4547	17.7692	18.1076	NaN	18.6082	17.9639	17.7474	17.3746	NaN	NaN	17.7585	17.2349	NaN	17.1061
P60843	Eif4a1	Eukaryotic initiation factor 4A-I	Eif4a1	Eif4a1	-0.611128	1.71005	0.0727027	-2.69479	0.832714	2.58464	1.75351	+		+	7	7	24.1227	24.7338	24.2775	24.661	0.581931	0.146163	0.0241238	0.00590946	24.5584	24.8765	24.661	24.8091	24.9519	24.6609	24.6189	24.2775	24.1718	23.0273	23.6739	24.5181	24.6225	24.5677
P62137	Ppp1ca	Serine/threonine-protein phosphatase PP1-alpha catalytic subunit	Ppp1ca	Ppp1ca	-0.579543	1.70364	0.0706494	-2.68682	0.038659	0.299075	2.18888	+		+	7	7	21.543	22.1225	21.6782	22.1088	0.446337	0.355619	0.0207184	0.016075	22.1088	22.1491	22.7077	21.7044	22.4525	21.8374	21.8979	21.8177	21.6782	21.667	21.5873	21.7324	20.5453	21.7731
P70671	Irf3	Interferon regulatory factor 3	Irf3	Irf3	-0.893795	1.79396	0.0653125	-2.84038	1.36375	1.63464	1.41405	+		+	6	7	19.4044	20.2982	19.3297	20.3853	0.82224	0.151996	0.0423738	0.00748813	20.0432	20.4504	20.3912	20.1622	20.2441	20.4112	20.3853	19.5977	19.0617	18.6578	18.637	20.8259	NaN	19.6465
P82349	Sgcb	Beta-sarcoglycan	Sgcb	Sgcb	-1.25187	2.1419	0.0505143	-3.74527	0.643216	0.988459	2.31477	+		+	3	6	17.9092	19.161	17.9253	19.1238	0.393349	0.500939	0.0219636	0.0261436	18.721	19.0127	19.9898	NaN	19.2349	19.3895	18.6183	17.9253	NaN	NaN	NaN	17.508	NaN	18.2942
P82350	Sgca	Alpha-sarcoglycan	Sgca	Sgca	-2.2173	1.94829	0.05496	-3.60751	0.191691	0.848312	1.81804	+		+	2	6	17.3866	19.6039	17.3866	19.7183	0.323218	0.811851	0.0185901	0.0414128	19.6769	19.9347	20.7812	NaN	19.0969	19.7597	18.3737	17.6151	NaN	NaN	17.158	NaN	NaN	NaN
P97457	Mylpf	Myosin regulatory light chain 2, skeletal muscle isoform	Mylpf	Mylpf	-1.87986	2.00941	0.0527111	-3.11795	0.946005	2.45556	1.77249	+		+	6	7	23.472	25.3518	23.5355	25.5212	1.08585	1.08191	0.0462614	0.042676	26.954	26.0417	25.6733	24.3896	25.5212	25.2367	23.6462	23.3535	22.4266	23.9697	23.7175	NaN	25.1641	22.2003
Q11011	Npepps	Puromycin-sensitive aminopeptidase	Npepps	Npepps	-0.483558	1.76163	0.0644571	-2.75895	0.488831	0.623426	2.17829	+		+	7	7	21.4304	21.9139	21.4779	21.9428	0.428622	0.176966	0.0200007	0.00807548	22.1811	21.9935	22.0557	21.7386	21.9428	21.7403	21.7455	21.9998	21.0101	20.7525	21.3998	21.7486	21.6239	21.4779
Q3THK7	Gmps	GMP synthase [glutamine-hydrolyzing]	Gmps	Gmps	-0.472645	2.12019	0.0524444	-3.26122	0.0763503	0.197625	2.08052	+		+	6	7	20.6927	21.1653	20.6012	21.1563	0.331098	0.181811	0.0160007	0.00859006	21.1563	21.2922	20.9786	21.0426	21.4026	20.949	21.336	20.7078	20.4596	NaN	20.4946	21.0994	20.3173	21.0774
Q3UV70	Pdp1	[Pyruvate dehydrogenase [acetyl-transferring]]-phosphatase 1, mitochondrial	Pdp1	Pdp1	-1.14359	2.35239	0.048	-3.76621	0.701733	3.02077	2.3055	+		+	5	6	17.5555	18.6991	17.7779	18.6046	0.695919	0.255292	0.0396411	0.0136527	18.6073	18.6018	18.9708	NaN	19.0559	18.5508	18.4078	18.2493	16.4908	NaN	17.2679	17.7779	NaN	17.9915		+					+
Q3UVK0	Ermp1	Endoplasmic reticulum metallopeptidase 1	Ermp1	Ermp1	-0.635207	1.59657	0.0771183	-2.586	0.482954	0.413579	2.02167	+		+	6	7	20.0248	20.66	19.9713	20.6817	0.491579	0.394964	0.0245486	0.0191174	21.0981	20.7659	20.6817	20.201	21.1801	20.5116	20.1813	20.4773	20.019	NaN	19.8853	20.6117	19.9237	19.2315
Q3V1L4	Nt5c2	Cytosolic purine 5'-nucleotidase	Nt5c2	Nt5c2	-0.736353	1.96103	0.0565106	-3.19385	0.618753	0.527398	2.87786	+		+	4	7	19.0447	19.781	18.9097	19.733	0.393334	0.354401	0.0206532	0.0179162	20.2529	19.733	19.803	19.5004	20.1957	19.2573	19.7249	19.6136	NaN	NaN	18.9952	18.8243	NaN	18.7456
Q5SX40	Myh1	Myosin-1	Myh1	Myh1	-2.08526	2.45458	0.0656	-3.62057	1.37866	3.42754	2.20283	+		+	7	7	24.6436	26.7288	24.769	26.9639	1.25118	0.8698	0.0507711	0.0325417	27.4924	27.154	27.7396	26.0349	26.9639	26.451	25.266	24.9258	24.4886	25.7455	24.769	23.1405	26.4191	23.0165
Q61081	Cdc37	Hsp90 co-chaperone Cdc37	Cdc37	Cdc37	-0.749718	1.70917	0.072	-2.83583	0.244687	1.52779	1.65093	+		+	4	7	18.7048	19.4545	18.6758	19.4184	0.633905	0.256804	0.0338899	0.0132002	19.848	19.3298	19.4184	19.1949	19.1832	19.7424	19.4651	19.4452	NaN	NaN	18.3675	18.9841	NaN	18.0225
Q61411	Hras	GTPase HRas	Hras	Hras	-0.34515	1.53345	0.08444	-3.32365	1.35875	1.91883	3.27022	+		+	2	4	17.7434	18.0885	17.7434	18.1107	0.0958129	0.126932	0.00539993	0.00701728	NaN	18.0375	18.1838	NaN	18.1999	17.9328	NaN	NaN	NaN	NaN	NaN	17.8111	NaN	17.6756
Q61687	Atrx	Transcriptional regulator ATRX	Atrx	Atrx	-0.403077	1.76951	0.063942	-2.85846	0.0899892	0.160444	1.63645	+		+	5	7	18.516	18.9191	18.4753	18.8799	0.341537	0.137461	0.0184455	0.00726575	18.8359	18.9088	18.8799	18.7917	19.1465	19.0701	18.8005	18.2134	NaN	NaN	18.1588	18.8505	18.4753	18.8819
Q62167	Ddx3x	ATP-dependent RNA helicase DDX3X	Ddx3x	Ddx3x	-0.450114	1.99887	0.0525217	-3.05314	1.94068	2.97402	1.46879	+		+	7	7	22.5959	23.046	22.5592	23.0558	0.325653	0.214691	0.0144121	0.00931578	23.2285	23.18	22.846	23.0145	23.2983	22.6988	23.0558	23.059	22.1914	22.203	22.5592	22.8035	22.8293	22.5257
Q62351	Tfrc	Transferrin receptor protein 1	Tfrc	Tfrc	-0.653415	1.46511	0.0910182	-2.38786	1.25989	5.77631	1.58215	+		+	7	7	20.4312	21.0846	20.4376	21.1944	0.583972	0.427935	0.0285824	0.0202961	21.2785	21.2411	20.7855	21.1944	21.8019	20.7774	20.5134	20.4376	19.5022	20.4814	20.432	19.9355	21.1247	21.1049		+					+
Q63850	Nup62	Nuclear pore glycoprotein p62	Nup62	Nup62	-0.829275	1.37882	0.0970992	-2.37158	0.0679131	0.0019782	1.41966	+		+	4	7	17.8142	18.6435	18.1868	18.5966	0.779988	0.403312	0.0437845	0.0216329	19.3552	18.1672	18.9747	18.4073	18.6335	18.5966	18.37	18.2383	NaN	NaN	16.645	18.204	NaN	18.1696	+		+
Q64339	Isg15	Ubiquitin-like protein ISG15	Isg15	Isg15	-0.907367	1.7709	0.0645294	-2.8107	1.50187	4.16728	1.50159	+		+	6	7	20.5095	21.4169	20.4458	21.4218	0.775263	0.341208	0.0378001	0.0159317	21.3129	21.4448	21.1474	22.0906	21.4218	21.0213	21.4795	20.771	21.0746	19.8212	NaN	20.1206	19.6447	21.6251											+
Q64737	Gart	Trifunctional purine biosynthetic protein adenosine-3	Gart	Gart	-0.413943	1.60417	0.0773626	-2.56267	0.029381	0.0224901	2.30114	+		+	7	7	20.8489	21.2629	20.688	21.2469	0.33673	0.263158	0.016151	0.0123764	21.7347	21.2056	21.3705	21.3349	21.0254	21.2469	20.922	21.3997	20.688	21.1263	20.6484	21.0116	20.4658	20.6026
Q6NVF0	Ocrl	Inositol polyphosphate 5-phosphatase OCRL-1	Ocrl	Ocrl	-1.06455	2.42501	0.0537143	-4.58309	0.196195	0.315357	1.67835	+		+	2	6	16.803	17.8675	16.803	17.7986	0.164756	0.302797	0.00980514	0.0169468	NaN	17.6344	17.709	18.4262	17.9299	17.6175	17.8883	NaN	NaN	NaN	16.6865	16.9195	NaN	NaN
Q6NZJ6	Eif4g1	Eukaryotic translation initiation factor 4 gamma 1	Eif4g1	Eif4g1	-0.3127	1.85165	0.0633793	-2.87069	0.547238	3.80353	2.51182	+		+	7	7	22.2747	22.5874	22.2123	22.5722	0.264196	0.115148	0.0118608	0.00509789	22.7375	22.4815	22.4577	22.5722	22.6684	22.4922	22.702	22.7555	22.0316	22.2123	22.1069	22.4195	22.0197	22.3771
Q6PIE5	Atp1a2	Sodium/potassium-transporting ATPase subunit alpha-2	Atp1a2	Atp1a2	-1.73147	2.30709	0.0487273	-3.5898	1.14741	1.27469	1.73333	+		+	5	7	19.0084	20.7398	19.3928	20.7824	0.993532	0.687628	0.0522682	0.0331549	21.3855	20.8558	21.5407	19.4456	20.7824	20.726	20.4428	19.8768	NaN	NaN	19.3928	17.3127	19.0385	19.421
Q6Y685	Tacc1	Transforming acidic coiled-coil-containing protein 1	Tacc1	Tacc1	-1.31472	1.42028	0.0944667	-2.65067	1.33581	0.589161	1.66467	+		+	3	5	17.4236	18.7383	17.0195	18.8237	0.856964	0.569834	0.0491841	0.0304101	NaN	17.7939	18.8237	NaN	18.9665	18.7812	19.3263	NaN	NaN	NaN	16.8434	17.0195	NaN	18.4079
Q7TNG8	Ldhd	Probable D-lactate dehydrogenase, mitochondrial	Ldhd	Ldhd	-1.85929	2.10015	0.0527368	-4.26977	1.22027	0.631388	2.17323	+		+	2	5	16.5669	18.4261	16.5669	18.2119	0.584707	0.503128	0.0352938	0.0273051	NaN	18.4468	18.0021	NaN	18.1892	18.2119	19.2807	NaN	NaN	NaN	NaN	16.9803	NaN	16.1534
Q7TQ48	Srl	Sarcalumenin	Srl	Srl	-1.5912	1.5182	0.0864554	-2.62688	0.153586	1.67188	1.43562	+		+	3	7	19.4049	20.9961	19.2376	21.1759	0.767254	0.911671	0.0395392	0.043421	21.7727	21.4122	22.0367	20.4281	21.1759	20.8052	19.3419	19.2376	NaN	NaN	18.7351	NaN	20.242	NaN
Q7TQE6	Maco1	Macoilin	Maco1	Maco1	-0.55145	1.6291	0.0755909	-3.56452	1.04432	0.912407	1.5414	+		+	2	4	17.9076	18.4591	17.9076	18.3818	0.156765	0.185357	0.00875406	0.0100415	NaN	18.4023	NaN	NaN	18.3613	18.7343	18.3385	NaN	NaN	NaN	17.7968	18.0185	NaN	NaN
Q80W22	Thnsl2	Threonine synthase-like 2	Thnsl2	Thnsl2	-0.91215	1.65496	0.0755181	-2.8305	0.790161	2.79534	1.57386	+		+	4	6	18.886	19.7982	19.1224	19.7673	0.647937	0.383263	0.0343078	0.0193585	19.7945	19.404	20.1214	NaN	19.7401	20.3453	19.3836	19.1583	17.9308	NaN	19.0865	19.3684	NaN	NaN
Q80WG5	Lrrc8a	Volume-regulated anion channel subunit LRRC8A	Lrrc8a	Lrrc8a	-1.36254	1.44706	0.0919649	-2.52155	0.435473	0.59261	1.36566	+		+	3	7	16.8572	18.2198	16.806	18.6405	0.314991	0.885715	0.0186858	0.0486128	19.1064	18.1734	18.6405	16.5232	18.8059	17.6403	18.6487	NaN	NaN	NaN	17.1947	16.806	NaN	16.571
Q80Y17	Llgl1	Lethal(2) giant larvae protein homolog 1	Llgl1	Llgl1	-1.70653	1.8402	0.0639322	-3.66971	1.04313	0.144415	1.563	+		+	2	5	17.0714	18.778	17.0714	18.7362	0.617092	0.539415	0.0361476	0.0287259	NaN	18.6789	19.3691	NaN	19.1451	17.9606	18.7362	NaN	NaN	NaN	17.5078	16.6351	NaN	NaN
Q810A3	Ttc9c	Tetratricopeptide repeat protein 9C	Ttc9c	Ttc9c	-1.12097	1.95142	0.0557551	-3.28025	0.331272	0.909025	1.60217	+		+	4	6	16.9445	18.0655	16.6989	18.0057	0.627721	0.460461	0.0370457	0.0254884	NaN	17.8434	18.7027	18.4561	17.7324	18.168	17.4904	16.565	NaN	NaN	17.8628	16.5175	NaN	16.8328
Q8BFW7	Lpp	Lipoma-preferred partner homolog	Lpp	Lpp	-0.854671	2.3451	0.046	-3.48345	1.11877	0.434748	2.07377	+		+	7	7	22.8356	23.6903	22.8709	23.8514	0.507454	0.404813	0.022222	0.0170877	23.4036	23.8514	23.8708	22.9014	24.0596	23.9656	23.7796	22.8709	23.6604	22.2264	23.1608	22.6309	22.2786	23.0213
Q8BG32	Psmd11	26S proteasome non-ATPase regulatory subunit 11	Psmd11	Psmd11	-0.398843	1.89644	0.0579259	-2.92621	0.366175	1.83358	1.9604	+		+	7	7	22.3369	22.7357	22.4108	22.7372	0.343348	0.110253	0.0153714	0.00484933	22.8028	22.8648	22.7985	22.7287	22.6975	22.7372	22.5205	22.4594	21.6264	22.6147	22.6423	22.4108	22.2344	22.3701
Q8BIW1	Prune1	Exopolyphosphatase PRUNE1	Prune1	Prune1	-1.05751	2.01524	0.0531818	-3.37905	0.171868	1.11881	2.30583	+		+	3	7	17.8083	18.8658	18.2344	18.8799	0.84049	0.196905	0.0471965	0.0104371	18.8799	19.0754	18.8773	18.6783	19.0411	18.9753	18.5334	NaN	16.8401	NaN	NaN	18.3504	NaN	18.2344
Q8BU30	Iars	Isoleucine--tRNA ligase, cytoplasmic	Iars	Iars	-0.696643	3.37619	0.076	-4.8179	0.584379	0.670138	2.58442	+		+	7	7	20.6406	21.3373	20.6678	21.3577	0.366535	0.10957	0.0177579	0.00513513	21.1658	21.3483	21.4065	21.3577	21.3803	21.2188	21.4836	21.0909	20.3014	20.2858	20.3128	21.143	20.6678	20.6828										+
Q8BYN3	Itpk1	Inositol-tetrakisphosphate 1-kinase	Itpk1	Itpk1	-1.9298	2.08987	0.0494634	-3.65437	0.534209	1.10194	2.55445	+		+	3	6	17.5254	19.4552	17.1294	19.2505	0.771154	0.736859	0.0440021	0.0378746	18.4348	19.1749	20.1542	NaN	20.4664	19.2553	19.2456	17.0327	NaN	NaN	NaN	17.1294	NaN	18.4141
Q8C6G8	Wdr26	WD repeat-containing protein 26	Wdr26	Wdr26	-0.563937	1.9336	0.0571765	-3.07943	0.103626	0.341742	2.18395	+		+	5	7	18.7475	19.3115	18.8358	19.3193	0.27429	0.335961	0.0146307	0.017397	19.3202	19.3193	19.5727	18.6711	19.7535	19.2614	19.282	18.8358	NaN	NaN	18.5874	18.958	18.3514	19.005		+				+
Q8CI51	Pdlim5	PDZ and LIM domain protein 5	Pdlim5	Pdlim5	-0.792614	2.42951	0.0616667	-3.58911	0.750474	1.21695	2.00936	+		+	7	7	21.6689	22.4615	21.8509	22.3392	0.474361	0.341128	0.0218913	0.0151872	22.276	22.6916	23.1154	22.0761	22.3946	22.3392	22.3378	21.8509	21.3601	20.7247	21.8906	21.9567	22.0919	21.8075
Q8CIZ8	Vwf	von Willebrand factor	Vwf	Vwf	-0.938094	1.38315	0.0970769	-2.37766	0.959763	1.16356	1.54165	+		+	5	6	19.0774	20.0155	19.4166	20.0787	0.922235	0.289416	0.0483417	0.0144596	19.7955	20.245	20.335	NaN	20.0635	19.5603	20.0939	19.4166	NaN	NaN	19.6358	17.4725	19.158	19.7043		+					+				+
Q8K2T8	Paf1	RNA polymerase II-associated factor 1 homolog	Paf1	Paf1	-1.21465	1.50833	0.0851429	-2.80346	1.33558	0.565786	1.40536	+		+	3	5	16.8496	18.0642	17.2657	18.1402	0.942796	0.28903	0.0559537	0.0160001	18.2879	NaN	18.1402	NaN	18.3498	17.8846	17.6586	17.2657	NaN	NaN	15.7703	17.5127	NaN	NaN
Q8R054	Srpx2	Sushi repeat-containing protein SRPX2	Srpx2	Srpx2	-1.13505	1.66991	0.0729756	-3.30388	0.80331	1.11504	1.50187	+		+	2	5	15.7828	16.9179	15.7828	17.1559	0.200748	0.447982	0.0127194	0.0264797	NaN	16.4272	17.1559	NaN	17.2163	16.4394	17.3507	NaN	NaN	NaN	15.9248	NaN	NaN	15.6409
Q8R429	Atp2a1	Sarcoplasmic/endoplasmic reticulum calcium ATPase 1	Atp2a1	Atp2a1	-2.42004	2.2827	0.0502609	-3.55603	0.491662	2.47424	2.24494	+		+	5	7	21.6373	24.0573	21.324	24.4796	0.887291	1.31397	0.0410076	0.0546184	24.4796	25.0153	25.7485	22.6562	24.7248	23.6825	22.0942	21.2457	20.6555	21.9748	21.324	NaN	22.9863	NaN
Q8VCH6	Dhcr24	Delta(24)-sterol reductase	Dhcr24	Dhcr24	-1.57189	1.37265	0.0974737	-2.47695	0.149365	1.46773	2.45287	+		+	2	7	18.5008	20.0727	18.5008	20.259	0.685186	0.807849	0.0370355	0.0402462	19.5503	20.5694	19.9155	20.2897	21.2402	20.259	18.6847	NaN	NaN	NaN	18.0163	18.9853	NaN	NaN
Q8VED5	Krt79	Keratin, type II cytoskeletal 79	Krt79	Krt79	-1.88275	2.2774	0.0483333	-3.98655	0.440074	1.02065	3.13363	+		+	3	6	21.8976	23.7803	21.6563	23.6999	0.561244	0.706065	0.0256304	0.0296911	23.8927	24.0306	22.8623	23.4342	24.9551	23.507	NaN	21.6563	21.4973	NaN	22.5391	NaN	NaN	NaN
Q8VEE4	Rpa1	Replication protein A 70 kDa DNA-binding subunit	Rpa1	Rpa1	-0.55371	1.3762	0.0973333	-2.29972	0.352367	0.671393	1.426	+		+	6	7	19.0121	19.5658	19.2719	19.5071	0.611123	0.17929	0.0321438	0.00916343	19.4508	19.4852	19.4318	19.9548	19.5071	19.551	19.5802	19.2925	18.4089	NaN	19.2514	19.4381	18.0901	19.5918
Q91VE0	Slc27a4	Long-chain fatty acid transport protein 4	Slc27a4	Slc27a4	-1.58488	2.42921	0.0569231	-3.76001	1.01557	0.065897	3.14183	+		+	5	7	18.7508	20.3357	19.1355	20.4314	0.834534	0.631964	0.0445065	0.0310766	20.0034	20.7113	20.4314	20.0921	21.3065	20.5185	19.2867	19.1355	NaN	17.6253	19.6079	19.2538	NaN	18.1316
Q91XE9	Creb3l3	Cyclic AMP-responsive element-binding protein 3-like protein 3	Creb3l3	Creb3l3	-1.50341	1.30953	0.110014	-2.58672	0.451331	0.651814	1.34721	+		+	2	5	18.1179	19.6214	18.1179	19.497	0.724148	0.687104	0.0399685	0.0350182	NaN	19.497	20.6597	NaN	19.8376	18.8224	19.2901	NaN	NaN	NaN	18.63	NaN	NaN	17.6059
Q91YH5	Atl3	Atlastin-3	Atl3	Atl3	-0.5762	1.50881	0.0858077	-2.443	0.00342091	0.0240627	2.70353	+		+	7	7	20.3463	20.9225	20.3768	20.9814	0.575556	0.241117	0.028288	0.0115243	21.0023	20.9814	20.8683	20.4566	21.17	20.8333	21.1456	20.9301	19.9308	19.8325	20.5628	20.3768	19.6348	21.1563
Q921G6	Lrch4	Leucine-rich repeat and calponin homology domain-containing protein 4	Lrch4	Lrch4	-1.37106	1.91744	0.0576923	-3.84243	0.728861	1.21864	2.00325	+		+	2	5	15.1782	16.5493	15.1782	16.5872	0.0564269	0.475986	0.00371763	0.0287618	17.1006	NaN	16.1761	NaN	16.9093	15.9731	16.5872	15.2181	NaN	NaN	NaN	15.1383	NaN	NaN
Q923T9	Camk2g	Calcium/calmodulin-dependent protein kinase type II subunit gamma	Camk2g	Camk2g	-0.786743	1.83375	0.064	-2.8916	0.364102	0.585392	2.64326	+		+	6	7	19.7386	20.5253	19.7369	20.7029	0.445388	0.522645	0.0225643	0.0254634	20.9335	20.7029	20.9707	19.4853	20.8299	20.4879	20.2672	20.4521	NaN	19.807	19.7365	19.0535	19.6452	19.7373
Q99J56	Derl1	Derlin-1	Derl1	Derl1	-1.35044	1.43648	0.0931379	-2.45255	0.069223	0.303869	1.79735	+		+	4	7	18.996	20.3465	18.5969	20.2745	1.16529	0.691867	0.0613436	0.0340042	19.5362	21.0054	21.2971	20.6017	20.2582	19.4523	20.2745	19.0207	18.1549	NaN	18.173	NaN	NaN	20.6356
Q99L88	Sntb1	Beta-1-syntrophin	Sntb1	Sntb1	-1.43353	2.31911	0.0497143	-4.06221	0.115517	2.47966	2.83559	+		+	3	6	17.2269	18.6604	16.9744	18.6128	0.658046	0.418912	0.0381987	0.0224492	18.8504	18.29	19.2255	NaN	18.2244	18.3752	18.9971	17.9738	NaN	NaN	16.7325	16.9744	NaN	NaN
Q9CQC7	Ndufb4	NADH dehydrogenase [ubiquinone] 1 beta subcomplex subunit 4	Ndufb4	Ndufb4	-0.617857	1.43742	0.0937043	-2.37964	0.280536	3.76922	2.38125	+		+	6	7	20.5251	21.143	20.4462	21.2313	0.472749	0.461582	0.0230327	0.0218315	20.8003	21.4161	21.9106	20.5621	21.2958	21.2313	20.7845	20.4844	21.1345	20.0504	NaN	21.0392	20.408	20.0341
Q9CR39	Wdr45b	WD repeat domain phosphoinositide-interacting protein 3	Wdr45b	Wdr45b	-0.402434	1.6963	0.0700253	-2.89245	0.38367	0.136363	1.9372	+		+	4	6	18.1261	18.5286	18.1565	18.5466	0.21516	0.215772	0.0118702	0.0116454	18.7262	18.3233	18.7829	NaN	18.6032	18.246	18.4899	18.1134	NaN	NaN	17.8394	18.1996	NaN	18.3522
Q9CWP6	Mospd2	Motile sperm domain-containing protein 2	Mospd2	Mospd2	-1.42606	1.74492	0.0658889	-2.96558	0.304418	0.0844255	1.7252	+		+	3	7	16.7858	18.2119	16.7168	18.2461	0.279463	0.788306	0.0166488	0.0432853	16.6484	18.2382	18.9097	18.5239	18.9952	17.9215	18.2461	NaN	NaN	NaN	16.7168	17.0933	NaN	16.5473
Q9CXE7	Tmed5	Transmembrane emp24 domain-containing protein 5	Tmed5	Tmed5	-1.30248	2.23741	0.0527692	-3.49352	1.32877	0.687206	1.35103	+		+	5	7	19.1581	20.4606	19.456	20.5583	0.752802	0.545789	0.0392942	0.0266752	20.3528	20.6044	21.0814	19.4652	20.9934	20.1684	20.5583	19.9783	18.1119	NaN	18.6703	19.456	NaN	19.5739
Q9CYT6	Cap2	Adenylyl cyclase-associated protein 2	Cap2	Cap2	-0.587855	1.64473	0.0764762	-2.64816	0.634928	2.82854	1.58239	+		+	6	7	20.5678	21.1557	20.4879	21.2441	0.445378	0.355774	0.0216541	0.016817	20.7355	21.3871	21.2441	20.6802	21.6146	21.4116	21.0166	20.2573	21.0001	NaN	21.1343	20.2694	20.0393	20.7065
Q9D0N7	Chaf1b	Chromatin assembly factor 1 subunit B	Chaf1b	Chaf1b	-0.844333	2.40054	0.052	-4.21195	1.50715	2.94023	2.31428	+		+	3	6	17.4191	18.2634	17.4817	18.2693	0.163792	0.319039	0.00940304	0.0174688	NaN	18.4841	18.0349	18.4884	18.6553	17.8632	18.0545	NaN	NaN	NaN	17.2332	17.4817	NaN	17.5423
Q9D6J1	Cers4	Ceramide synthase 4	Cers4	Cers4	-1.66307	2.56775	0.0511111	-4.90196	1.5401	0.653265	2.93562	+		+	2	6	18.4035	20.0666	18.4035	20.1086	0.149765	0.450218	0.00813785	0.0224362	20.1637	20.0535	19.6557	20.2965	20.7385	19.4915	NaN	NaN	NaN	NaN	NaN	18.2976	NaN	18.5094
Q9DB73	Cyb5r1	NADH-cytochrome b5 reductase 1	Cyb5r1	Cyb5r1	-0.913611	1.39778	0.0982903	-2.39821	0.663328	0.584139	1.48718	+		+	4	7	18.5351	19.4487	18.9144	19.443	1.01418	0.199595	0.0547169	0.0102626	19.3993	19.5331	19.7964	19.1451	19.443	19.4946	19.3293	19.0665	NaN	NaN	17.0458	18.7624	NaN	19.2656
Q9DBL7	Coasy	Bifunctional coenzyme A synthase	Coasy	Coasy	-0.477643	1.46728	0.0912661	-2.4185	0.0866016	2.02293	1.95707	+		+	6	7	19.7726	20.2502	19.7841	20.0803	0.420099	0.289753	0.0212465	0.0143086	20.635	20.0497	20.6496	20.0803	19.9883	20.3277	20.0211	20.21	19.6187	NaN	19.2594	20.2299	19.3681	19.9495
Q9DCX1	Mad2l1bp	MAD2L1-binding protein	Mad2l1bp	Mad2l1bp	-1.16522	1.82075	0.0631613	-3.3664	0.56864	0.440507	1.79111	+		+	2	6	15.9528	17.118	15.9528	17.1905	0.4995	0.407128	0.0313111	0.0237836	17.1678	16.6234	17.7454	NaN	17.2131	16.7142	17.2442	NaN	NaN	NaN	NaN	16.306	NaN	15.5996
Q9ER41	Tor1b	Torsin-1B	Tor1b	Tor1b	-1.30878	1.75929	0.063831	-3.25274	1.77267	0.213485	1.85023	+		+	3	5	17.515	18.8238	17.418	18.8344	0.82081	0.344189	0.0468632	0.0182848	NaN	18.3657	18.8344	NaN	19.0845	18.6184	19.2159	16.747	NaN	NaN	NaN	17.418	NaN	18.38
Q9JM96	Cdc42ep4	Cdc42 effector protein 4	Cdc42ep4	Cdc42ep4	-0.687119	1.95872	0.05575	-3.62756	0.378261	0.792101	5.39429	+		+	3	5	17.8783	18.5654	17.9178	18.5523	0.192809	0.286916	0.0107845	0.0154543	18.5523	NaN	18.6913	NaN	18.9684	18.213	18.4021	17.6688	NaN	NaN	NaN	18.0483	NaN	17.9178
Q9QXY9	Pex3	Peroxisomal biogenesis factor 3	Pex3	Pex3	-1.21604	1.50506	0.0846792	-2.50355	0.214524	2.66724	2.87639	+		+	5	7	18.3712	19.5872	18.6429	19.6886	1.09869	0.584936	0.0598048	0.0298631	20.673	19.6886	18.9995	19.0267	19.7064	19.8061	19.2104	16.9581	17.5455	NaN	19.6205	19.089	NaN	18.6429
Q9QXZ0	Macf1	Microtubule-actin cross-linking factor 1	Macf1	Macf1	-0.599481	1.3974	0.097632	-2.32743	0.194817	1.28052	1.6734	+		+	6	7	19.9304	20.5299	20.147	20.577	0.619469	0.270504	0.0310816	0.0131761	20.6986	20.2927	20.5382	20.0499	20.7758	20.577	20.7772	20.3835	19.7342	NaN	20.4038	20.1916	18.7672	20.1023
Q9QYR9	Acot2	Acyl-coenzyme A thioesterase 2, mitochondrial	Acot2	Acot2	-0.568979	1.47743	0.089963	-2.43169	0.326926	0.589938	1.78352	+		+	6	7	20.6896	21.2586	20.8271	21.2178	0.563371	0.244528	0.0272296	0.0115025	21.206	21.2178	21.3376	20.8298	21.583	21.157	21.4792	20.9816	19.6745	NaN	20.9863	20.6726	20.5343	21.2886											+
Q9QZ47	Tnnt3	Troponin T, fast skeletal muscle	Tnnt3	Tnnt3	-2.15497	1.90069	0.0586415	-2.97779	1.28631	2.04953	1.69965	+		+	6	7	21.3509	23.5059	20.8264	24.2361	1.39446	1.2172	0.0653116	0.0517828	24.2361	24.2474	24.6482	22.6003	24.4243	23.0253	21.3595	20.8044	20.3984	22.7232	19.9073	NaN	23.4238	20.8483
Q9QZW0	Atp11c	Phospholipid-transporting ATPase 11C	Atp11c	Atp11c	-1.50753	2.8457	0.0424	-7.84423	1.51603	1.32235	3.24225	+		+	2	4	15.7737	17.2812	15.7737	17.2669	0.228537	0.219661	0.0144885	0.012711	NaN	NaN	17.5034	NaN	17.0973	17.4365	17.0877	NaN	NaN	NaN	15.9353	15.6121	NaN	NaN
Q9R061	Nubp2	Cytosolic Fe-S cluster assembly factor NUBP2	Nubp2	Nubp2	-1.19088	2.07724	0.0492381	-3.85913	0.55464	1.17369	2.88787	+		+	2	6	18.1827	19.3736	18.1827	19.4425	0.192544	0.404961	0.0105894	0.0209027	18.7326	19.1056	19.4491	NaN	19.6367	19.882	19.4358	18.0466	18.3189	NaN	NaN	NaN	NaN	NaN
Q9R0E1	Plod3	Procollagen-lysine,2-oxoglutarate 5-dioxygenase 3	Plod3	Plod3	-0.780829	1.6348	0.0767442	-2.63536	0.745051	4.11464	1.47652	+		+	6	7	19.4876	20.2684	19.2805	20.1853	0.591077	0.47836	0.0303309	0.0236012	20.0134	20.1853	20.2606	19.5177	20.8893	20.1609	20.8518	18.987	19.3869	NaN	20.0371	18.9564	19.1741	20.3841											+
Q9R0N0	Galk1	Galactokinase	Galk1	Galk1	-0.374357	1.4834	0.0897196	-2.41097	0.016426	0.00739266	2.95498	+		+	7	7	20.8495	21.2238	20.6621	21.2116	0.387627	0.13606	0.0185917	0.00641073	21.0477	21.4243	21.2116	21.0795	21.2935	21.1774	21.3328	20.6318	20.4588	21.3754	21.4054	20.6621	20.5653	20.8475
Q9R111	Gda	Guanine deaminase	Gda	Gda	-0.615501	1.42382	0.0944874	-2.3356	0.324025	4.91795	2.04285	+		+	7	7	20.7886	21.4041	20.7183	21.2602	0.639467	0.277885	0.0307604	0.0129828	21.7642	21.1908	21.2513	21.2602	21.8507	21.2373	21.2744	21.3361	20.7183	20.5086	20.814	20.4596	19.853	21.8308		+					+
Q9WTI7	Myo1c	Unconventional myosin-Ic	Myo1c	Myo1c	-0.436128	1.51395	0.0855146	-2.44947	1.21777	0.175498	1.41816	+		+	7	7	23.0368	23.473	23.2299	23.607	0.377738	0.281473	0.0163972	0.0119914	23.6335	23.4955	23.607	22.8802	23.664	23.3744	23.6561	23.3246	23.2299	22.6652	23.4435	22.508	22.7669	23.3197
Q9WUM4	Coro1c	Coronin-1C	Coro1c	Coro1c	-0.868872	1.71616	0.0728219	-2.7024	0.84768	1.32463	1.56985	+		+	7	7	21.7441	22.613	22.0935	22.6098	0.812116	0.253159	0.0373487	0.0111953	22.6015	22.8109	22.6098	22.1037	22.77	22.8507	22.5445	22.3658	20.3957	21.0585	22.571	22.3359	21.3886	22.0935		+				+
Q9WVL0	Gstz1	Maleylacetoacetate isomerase	Gstz1	Gstz1	-0.825604	1.88424	0.0575714	-3.08404	1.7147	2.69655	1.48551	+		+	4	7	19.2616	20.0872	19.2067	19.9595	0.503723	0.383091	0.0261516	0.0190714	20.2724	20.5021	20.5871	19.5256	19.9462	19.9595	19.8177	19.56	NaN	NaN	18.8534	19.8163	NaN	18.8168
Q9Z1E4	Gys1	Glycogen [starch] synthase, muscle	Gys1	Gys1	-1.32605	2.43186	0.0669091	-3.66848	0.330971	1.19188	1.99586	+		+	6	7	19.4262	20.7522	19.3286	20.8604	0.661776	0.639498	0.0340662	0.0308159	20.8812	21.0109	21.8327	20.2658	20.6319	20.8604	19.7827	19.6704	NaN	20.1675	20.1591	18.9139	18.6595	18.9867											+
Q9Z1W9	Stk39	STE20/SPS1-related proline-alanine-rich protein kinase	Stk39	Stk39	-1.0349	2.20675	0.0528276	-3.68077	0.109322	1.26719	1.85955	+		+	3	7	18.7907	19.8256	18.8645	19.874	0.43744	0.396941	0.0232795	0.0200216	19.9354	19.874	20.4669	20.0125	19.768	19.5199	19.2027	NaN	NaN	NaN	19.1866	18.8645	NaN	18.3211
Q9Z1Z0	Uso1	General vesicular transport factor p115	Uso1	Uso1	-0.368428	1.51516	0.0861961	-2.45098	0.777277	1.26526	1.38821	+		+	7	7	20.8307	21.1991	20.8634	21.1827	0.344363	0.198956	0.0165316	0.00938512	21.3007	21.1492	21.1827	21.1093	20.8487	21.4778	21.3252	21.2131	20.4875	20.8634	20.4732	21.3311	20.573	20.8733
A2AGT5	Ckap5	Cytoskeleton-associated protein 5	Ckap5	Ckap5	-0.13076	0.758736	0.24427	-1.45249	0.513569	0.476484	1.47956				6	7	19.4051	19.5358	19.3867	19.6284	0.17861	0.146351	0.00920427	0.0074914	19.4657	19.419	19.6359	19.2878	19.642	19.6721	19.6284	19.3969	19.2887	NaN	19.5121	19.6856	19.3765	19.1707
A2AJ88	Pnpla7	Patatin-like phospholipase domain-containing protein 7	Pnpla7	Pnpla7	-0.986681	0	1	0	0.0428954	0.157668	2.21433				1	5	18.1997	19.1864	18.1997	19.1136	NaN	0.179299	NaN	0.00934513	NaN	19.0648	19.1136	NaN	19.3634	19.3913	18.9988	NaN	NaN	NaN	18.1997	NaN	NaN	NaN		+				+
A2AN08	Ubr4	E3 ubiquitin-protein ligase UBR4	Ubr4	Ubr4	-0.324219	0.949628	0.176122	-1.72595	0.147413	0.0893479	1.58737				6	7	20.0677	20.3919	20.1371	20.4893	0.384296	0.293157	0.01915	0.0143762	19.9211	20.4893	20.739	20.0878	20.6364	20.3712	20.4984	20.1685	20.1056	NaN	20.4001	20.4025	19.3652	19.9641
C0HKD8;C0HKD9	Mfap1a;Mfap1b	Microfibrillar-associated protein 1A	Mfap1a	Mfap1a	0.0445745	0.102353	0.904424	0.273498	1.68999	0.174886	1.48074				5	7	19.3295	19.2849	19.2322	19.3384	0.292467	0.268509	0.0151306	0.0139233	19.1685	19.4891	19.6803	18.847	19.3384	19.1318	19.3391	19.6486	19.2322	NaN	19.2033	19.6059	NaN	18.9573
E9PVX6	Mki67	Proliferation marker protein Ki-67	Mki67	Mki67	-0.228669	0.952549	0.176192	-1.74519	0.372827	1.17272	1.52188				5	7	19.0901	19.3187	19.1644	19.2515	0.225347	0.222717	0.0118044	0.0115285	19.0507	19.4812	19.1261	19.3714	19.7054	19.2515	19.2448	19.2241	NaN	18.8514	19.3524	19.1644	NaN	18.858
E9PWW9	Rsf1	Remodeling and spacing factor 1	Rsf1	Rsf1	0.467225	0	1	0	1.81184	0.749239	1.40973				1	4	15.9728	15.5056	15.9728	15.5664	NaN	0.522454	NaN	0.0336946	NaN	NaN	15.2853	NaN	15.8475	14.8764	16.0131	NaN	NaN	NaN	NaN	15.9728	NaN	NaN
E9Q0B5	Fcgbp	Fc fragment of IgG-binding protein	Fcgbp	Fcgbp	0.500043	0.308625	0.599772	0.709898	0.344344	2.75501	1.41683				7	7	24.2931	23.793	24.481	24.288	1.14002	1.47427	0.0469279	0.0619623	24.2437	24.288	25.1928	24.9663	21.8634	24.4598	21.5372	24.2489	24.8122	23.8915	24.481	24.8276	25.7292	22.0611
E9Q616	Ahnak	AHNAK nucleoprotein (desmoyokin)	Ahnak	Ahnak	-0.222157	0.884669	0.189125	-1.62362	3.1729	0.589362	1.35665				7	7	24.2644	24.4866	24.3571	24.4259	0.307068	0.191736	0.012655	0.00783022	24.6906	24.4259	24.2339	24.3375	24.4189	24.775	24.5244	24.3986	24.3571	23.7464	23.9568	24.4268	24.6478	24.3176		+					+
E9Q784	Zc3h13	Zinc finger CCCH domain-containing protein 13	Zc3h13	Zc3h13	0.576115	0.715177	0.264869	1.39688	0.0757008	0.101953	1.54001				5	7	18.7452	18.1691	18.6242	18.2051	0.859415	0.578333	0.0458472	0.0318306	18.2051	17.5765	18.9519	17.5815	18.8936	17.7579	18.2171	18.8707	NaN	20.1101	17.8121	18.3089	NaN	18.6242
F2Z472	Svs3a	Seminal vesicle secretory protein 3A	Svs3a	Svs3a	-2.5402	0	1	0	0.779865	2.94967	1.43329				1	7	18.2629	20.8031	18.2629	21.158	NaN	1.2439	NaN	0.059794	21.8772	21.158	19.7544	18.9961	21.7955	19.8889	22.1516	NaN	NaN	NaN	NaN	18.2629	NaN	NaN
F8VPU2	Farp1	FERM, ARHGEF and pleckstrin domain-containing protein 1	Farp1	Farp1	-0.707284	1.22132	0.126477	-2.24005	0.262956	0.624244	1.51845				3	6	18.5337	19.241	18.5648	19.2912	0.566291	0.38842	0.0305547	0.0201871	18.6871	19.2194	19.6945	NaN	19.363	18.9044	19.5775	18.5648	NaN	NaN	19.0838	17.9525	NaN	NaN
O08919	Numbl	Numb-like protein	Numbl	Numbl	-1.37745	0	1	0	0.578405	0.760137	1.69346				1	6	16.4484	17.8258	16.4484	17.9943	NaN	0.536389	NaN	0.0300905	17.0956	18.3396	18.0437	NaN	18.3006	17.2306	17.945	16.4484	NaN	NaN	NaN	NaN	NaN	NaN
O35216	Cenpa	Histone H3-like centromeric protein A	Cenpa	Cenpa	0.12238	0.101719	0.903469	0.276844	1.08827	0.464399	1.614				3	5	18.0412	17.9188	18.2722	18.0192	0.745831	0.521019	0.0413404	0.0290767	NaN	18.0803	18.0192	NaN	18.599	17.1801	17.7155	18.6442	NaN	NaN	17.2072	NaN	NaN	18.2722
O35343	Kpna4	Importin subunit alpha-3	Kpna4	Kpna4	-0.525589	0.736978	0.254831	-1.44178	0.0796569	0.74776	1.56525				4	7	18.3578	18.8834	18.1318	19.0182	0.715129	0.501692	0.038955	0.0265678	18.0111	19.3633	19.0178	18.3602	19.2082	19.2051	19.0182	17.8381	NaN	NaN	18.4254	17.8232	NaN	19.3446
O35381	Anp32a	Acidic leucine-rich nuclear phosphoprotein 32 family member A	Anp32a	Anp32a	0.224058	0.555172	0.362417	1.13509	0.0971753	0.426993	1.41844				7	7	23.9523	23.7282	23.9153	23.6458	0.431285	0.294514	0.018006	0.012412	23.4785	23.7565	23.4822	24.3415	23.6196	23.6458	23.7734	23.9153	24.3223	23.6676	23.194	23.8819	24.4211	24.2637
O35382	Exoc4	Exocyst complex component 4	Exoc4	Exoc4	-0.558415	1.21918	0.126282	-2.07296	0.247985	0.227528	1.4879				7	7	19.2413	19.7997	19.5093	19.7136	0.632884	0.327744	0.032892	0.016553	19.5323	19.7131	20.1798	19.3224	20.2123	19.7136	19.9244	18.9903	19.9005	18.2749	19.6141	19.8154	18.5845	19.5093
O35387	Hax1	HCLS1-associated protein X-1	Hax1	Hax1	-1.3708	0	1	0	0.500804	0.432068	1.52244				1	4	16.0095	17.3803	16.0095	17.3607	NaN	0.337102	NaN	0.0193957	NaN	NaN	17.5432	NaN	17.7692	17.0306	17.1782	NaN	NaN	NaN	NaN	NaN	NaN	16.0095
O35459	Ech1	Delta(3,5)-Delta(2,4)-dienoyl-CoA isomerase, mitochondrial	Ech1	Ech1	-0.699257	0.906537	0.187008	-1.65408	0.357664	1.15474	1.35396				7	7	20.144	20.8433	20.5431	20.8233	1.11	0.137463	0.0551034	0.00659508	20.6938	20.7698	20.9493	21.087	20.8233	20.8565	20.7232	20.7536	17.6624	20.3772	20.2894	20.5431	20.5707	20.8117											+
O35598	Adam10	Disintegrin and metalloproteinase domain-containing protein 10	Adam10	Adam10	-0.0229408	0.0794415	0.942408	-0.21614	1.77591	1.89861	1.60893				6	7	20.8074	20.8304	20.8288	20.7991	0.259739	0.102494	0.012483	0.00492044	20.9188	20.8724	20.9908	20.7991	20.7213	20.7968	20.7133	20.8237	20.6923	NaN	20.834	21.0855	21.0396	20.3694
O35730	Ring1	E3 ubiquitin-protein ligase RING1	Ring1	Ring1	0.759868	1.2214	0.127273	2.31252	1.8114	2.26476	1.3334				2	6	18.5081	17.7482	18.5081	17.8516	0.687308	0.31602	0.0371355	0.0178057	18.0866	17.9607	17.917	NaN	17.7862	17.2626	17.4763	18.9941	NaN	NaN	NaN	NaN	NaN	18.0221
O54734	Ddost	Dolichyl-diphosphooligosaccharide--protein glycosyltransferase 48 kDa subunit	Ddost	Ddost	-0.2791	0.590471	0.334435	-1.19078	0.437638	0.635634	1.98748				7	7	23.1317	23.4108	23.3901	23.4222	0.599136	0.15995	0.0259011	0.00683234	23.5121	23.2784	23.588	23.4222	23.206	23.2744	23.5942	23.2774	22.0671	23.7455	22.5412	23.4957	23.3901	23.4046
O55029	Copb2	Coatomer subunit beta'	Copb2	Copb2	-0.144	0.55477	0.361665	-1.13445	0.382014	0.619561	1.5665				7	7	23.5399	23.6839	23.6453	23.6879	0.301392	0.14815	0.0128035	0.00625531	23.4502	23.7397	23.909	23.6879	23.5692	23.652	23.7793	23.3159	23.6596	23.9069	23.6453	23.8559	23.2187	23.177
O55102	Bloc1s1	Biogenesis of lysosome-related organelles complex 1 subunit 1	Bloc1s1	Bloc1s1	1.30725	0	1	0	0.891692	0.797366	1.4525				1	4	16.9866	15.6793	16.9866	15.8153	NaN	0.414116	NaN	0.0264115	NaN	16.0031	NaN	15.0837	NaN	15.9099	15.7207	NaN	NaN	NaN	NaN	NaN	NaN	16.9866
O55126	Nipsnap2	Protein NipSnap homolog 2	Nipsnap2	Nipsnap2	-0.466686	0.861568	0.197508	-1.59124	0.139903	2.59017	1.34192				7	7	21.5392	22.0059	21.6316	22.1418	0.67403	0.38444	0.0312931	0.0174698	21.8271	22.3072	22.5314	21.4711	22.1575	22.1418	21.6054	21.3927	20.6006	22.6324	21.8862	21.7625	21.6316	20.8687
O70209	Pdlim3	PDZ and LIM domain protein 3	Pdlim3	Pdlim3	-0.4919	1.13761	0.134022	-1.96618	0.0203603	3.40157	2.0054				7	7	23.7835	24.2754	23.8398	24.5076	0.436011	0.498025	0.0183325	0.0205156	24.7602	24.6112	24.5076	23.3885	24.6455	23.9093	24.1055	24.0403	23.8398	23.0954	24.4809	23.5662	23.5593	23.9026
O70250	Pgam2	Phosphoglycerate mutase 2	Pgam2	Pgam2	-1.07225	0.730387	0.255931	-1.43164	0.167513	2.66246	1.49675				4	7	21.359	22.4313	21.3471	22.659	1.26619	1.15766	0.0592811	0.0516091	22.958	23.0435	24.1843	21.5349	22.0227	22.659	20.6165	20.1662	NaN	22.5756	20.3708	NaN	22.3235	NaN
O70404	Vamp8	Vesicle-associated membrane protein 8	Vamp8	Vamp8	0.174954	0.659677	0.297307	1.30376	0.9128	5.76228	2.13817				6	7	20.6619	20.4869	20.6259	20.3941	0.210057	0.264366	0.0101664	0.0129042	20.8761	20.3941	20.1615	20.7909	20.5409	20.3671	20.2779	20.8737	20.6136	NaN	20.5891	20.3408	20.9158	20.6383
O70423	Aoc3	Membrane primary amine oxidase	Aoc3	Aoc3	-0.5115	1.00938	0.160991	-1.79499	0.488789	1.34207	1.36032				7	7	23.8068	24.3183	23.7432	24.3828	0.611314	0.441256	0.0256781	0.0181451	24.6244	24.3828	24.6544	23.419	24.6816	24.2005	24.2652	24.6577	23.3782	23.6427	24.1225	22.8189	23.7432	24.2842
O70456	Sfn	14-3-3 protein sigma	Sfn	Sfn	0.538214	0.610418	0.32511	1.22182	0.0631005	0.616964	1.50728				7	7	22.9571	22.4189	22.8405	22.4511	0.69732	0.933829	0.0303749	0.0416537	22.6604	22.4511	21.5681	24.0179	22.2262	22.8735	21.135	22.6561	23.3383	22.0103	22.3023	22.8405	23.7506	23.8016
O70551	Srpk1	SRSF protein kinase 1	Srpk1	Srpk1	-0.236529	0.553785	0.360346	-1.13288	0.897989	0.311495	2.36688				7	7	20.0877	20.3242	19.9739	20.2709	0.447911	0.323287	0.0222978	0.0159065	19.7506	20.5087	20.6803	20.2703	20.641	20.2709	20.1478	19.4871	19.9078	20.9048	20.265	19.9739	19.8213	20.254
O88569	Hnrnpa2b1	Heterogeneous nuclear ribonucleoproteins A2/B1	Hnrnpa2b1	Hnrnpa2b1	0.276071	1.13654	0.132783	1.96475	0.259188	0.202769	1.35058				7	7	24.8705	24.5945	24.9061	24.5585	0.270714	0.254792	0.0108849	0.0103597	25.079	24.5585	24.5605	24.7543	24.3525	24.3478	24.5087	24.9185	24.8744	24.9404	24.6108	24.4984	25.3452	24.9061
O88811	Stam2	Signal transducing adapter molecule 2	Stam2	Stam2	-0.096571	0.197786	0.751773	-0.488235	0.991451	0.16964	1.52351				7	7	19.4337	19.5303	19.3411	19.6325	0.350827	0.388307	0.0180525	0.0198823	18.7157	19.6325	19.6697	19.4968	19.5091	19.7648	19.9236	18.9672	19.2926	19.7825	19.3411	20.0004	19.2112	19.4412
O88986	Gcat	2-amino-3-ketobutyrate coenzyme A ligase, mitochondrial	Gcat	Gcat	-1.28331	1.22319	0.127556	-2.42409	0.0448522	0.749441	1.63554				2	5	17.4305	18.7138	17.4305	18.5671	0.962726	0.518418	0.0552324	0.0277025	19.2117	NaN	18.3907	NaN	18.1077	18.5671	19.2916	NaN	NaN	NaN	16.7497	18.1112	NaN	NaN
O89029	Matn4	Matrilin-4	Matn4	Matn4	-2.7771	0	1	0	0.269164	2.05742	2.61213				1	3	16.4239	19.201	16.4239	19.621	NaN	0.834536	NaN	0.0434632	NaN	NaN	NaN	NaN	19.621	18.2399	19.7421	NaN	NaN	NaN	NaN	16.4239	NaN	NaN
O89051	Itm2b	Integral membrane protein 2B	Itm2b	Itm2b	0.426466	1.11056	0.134769	1.96704	0.473497	0.28401	1.33187				6	6	19.565	19.1385	19.4635	19.1578	0.522287	0.0961584	0.026695	0.00502434	NaN	19.0445	19.1383	19.1773	19.0133	19.273	19.1846	19.1346	19.3983	NaN	19.6419	20.5463	19.5288	19.1399
O89053	Coro1a	Coronin-1A	Coro1a	Coro1a	0.2745	0.354946	0.546507	0.795766	0.727815	7.43389	1.86059				7	7	23.9526	23.6781	23.9703	23.6426	0.617131	0.672372	0.0257646	0.0283963	23.4429	23.6426	22.7562	24.6005	23.8256	23.0592	24.42	24.1103	24.3773	23.7344	23.8767	22.8049	23.9703	24.7946
P00493	Hprt1	Hypoxanthine-guanine phosphoribosyltransferase	Hprt1	Hprt1	0.144889	0.242383	0.685974	0.583793	0.919052	1.26419	1.33237				5	7	21.3954	21.2505	21.2947	21.1321	0.511963	0.35311	0.0239287	0.0166166	21.0836	21.1464	20.9117	21.9218	21.1321	21.5322	21.0255	21.2947	21.7573	NaN	NaN	21.2461	22.0022	20.6765
P05132	Prkaca	cAMP-dependent protein kinase catalytic subunit alpha	Prkaca	Prkaca	-1.35101	1.07897	0.14402	-1.94696	0.125264	1.7771	1.52626				4	7	17.1667	18.5178	17.3132	18.4912	1.34414	0.967019	0.078299	0.0522212	20.3374	18.527	18.8224	17.7654	18.4415	17.2394	18.4912	18.6479	15.3927	NaN	NaN	17.4477	NaN	17.1787
P05977	Myl1	Myosin light chain 1/3, skeletal muscle isoform	Myl1	Myl1	-1.60116	1.21376	0.123185	-2.08537	0.448741	2.24107	1.32371				6	7	23.8918	25.493	23.2677	25.8188	1.387	1.37428	0.0580533	0.0539084	27.6155	26.0757	25.8188	25.3109	26.0393	24.1727	23.4178	24.6886	23.3639	23.1715	22.7733	NaN	26.3654	22.9881
P07742	Rrm1	Ribonucleoside-diphosphate reductase large subunit	Rrm1	Rrm1	-0.487629	0.90052	0.18871	-1.67066	0.178444	1.91573	1.33926				5	7	19.1119	19.5995	18.8808	19.5844	0.694819	0.303778	0.0363553	0.0154992	19.5746	19.5844	19.7458	19.9318	19.9223	19.3353	19.1025	18.562	18.8808	NaN	20.2532	19.2541	NaN	18.6094
P07744	Krt4	Keratin, type II cytoskeletal 4	Krt4	Krt4	0.796243	0.526649	0.382936	1.09382	0.240599	1.26913	1.56609				6	7	22.3604	21.5642	22.5005	22.1722	0.883431	1.57743	0.0395087	0.0731506	22.1722	22.2035	19.3627	23.0511	23.1583	19.4305	21.5708	22.5192	22.8941	NaN	22.4819	21.6886	21.0411	23.5375
P09671	Sod2	Superoxide dismutase [Mn], mitochondrial	Sod2	Sod2	-0.198686	0.321864	0.583619	-0.734793	0.447329	0.416944	1.31422				7	7	21.4822	21.6809	21.7809	21.5524	0.588748	0.406422	0.0274063	0.0187456	22.4162	21.5377	21.4908	21.1051	21.8259	21.5524	21.838	21.7809	21.792	22.26	20.6028	21.2334	20.8943	21.8119	+				+						+
P0C5K1	Sbk2	Serine/threonine-protein kinase SBK2	Sbk2	Sbk2	-4.52935	0	1	0	0.538794	1.92223	1.85549				1	2	15.346	19.8753	15.346	19.8753	NaN	0.923976	NaN	0.0464886	NaN	NaN	20.5287	NaN	NaN	19.222	NaN	NaN	NaN	NaN	15.346	NaN	NaN	NaN
P0DN34	Ndufb1	NADH dehydrogenase [ubiquinone] 1 beta subcomplex subunit 1	Ndufb1	Ndufb1	-0.490823	0.433171	0.465738	-0.952289	0.925751	0.854355	1.41588				3	7	18.9253	19.4162	18.7597	19.4759	0.535808	0.805065	0.0283117	0.0414636	17.9946	19.4759	20.4583	18.977	20.0957	19.7013	19.2103	18.7597	NaN	NaN	NaN	19.5244	NaN	18.4919
P0DP26;P0DP27;P0DP28	Calm1;Calm2;Calm3	Calmodulin-1	Calm1	Calm1	0.978543	1.21649	0.123875	2.06947	0.403385	0.177994	1.38303				7	7	26.7123	25.7338	26.9603	25.6166	0.825496	0.940025	0.0309032	0.0365288	26.9177	25.7299	25.6166	27.0626	24.6355	25.2845	24.8896	26.1292	26.9603	25.5498	27.0664	26.0336	27.8348	27.4121
P10126	Eef1a1	Elongation factor 1-alpha 1	Eef1a1	Eef1a1	-0.169429	0.937108	0.177738	-1.69635	1.2616	0.103787	2.95733				7	7	27.4696	27.639	27.4769	27.6642	0.183235	0.190406	0.00667048	0.00688901	27.5263	27.8077	27.8628	27.6664	27.6596	27.2862	27.6642	27.5343	27.5544	27.7564	27.1634	27.4769	27.4487	27.3531
P10639	Txn	Thioredoxin	Txn	Txn	0.548315	0.577548	0.344552	1.17051	0.200603	0.272726	1.63775				7	7	26.0502	25.5019	26.279	25.4178	1.06761	0.629503	0.0409826	0.0246845	25.6043	25.4178	25.3084	26.6529	24.7702	25.8449	24.9147	26.3735	26.279	23.9675	25.683	26.4791	27.4726	26.0967											+
P10922	H1f0	Histone H1.0	H1f0	H1f0	0.3075	0.748753	0.249121	1.42963	0.307726	2.61841	2.15111				7	7	25.2168	24.9093	25.267	24.9752	0.43305	0.369212	0.017173	0.0148222	24.7947	25.154	25.0639	24.9752	24.8206	24.1977	25.3592	25.1043	25.6039	24.7155	25.4059	25.7907	25.267	24.6305
P11031	Sub1	Activated RNA polymerase II transcriptional coactivator p15	Sub1	Sub1	0.123186	0.0862725	0.933134	0.232804	0.983993	1.12593	1.40312				7	7	23.4016	23.2785	23.576	23.1487	1.21674	0.692432	0.0519938	0.0297456	22.5844	23.1487	22.4608	24.407	22.9735	23.6219	23.7529	22.7413	23.9062	21.026	23.576	23.5311	24.6158	24.4151
P11247	Mpo	Myeloperoxidase	Mpo	Mpo	-0.817343	0.693447	0.275932	-1.34798	0.177981	3.51505	1.6609				7	7	20.5638	21.3811	20.3634	21.5462	1.36346	0.845318	0.0663039	0.0395358	21.5462	21.567	19.6653	22.0288	22.2655	21.1159	21.479	21.3155	20.3634	19.2314	19.538	19.2451	21.3853	22.8676
P12382	Pfkl	ATP-dependent 6-phosphofructokinase, liver type	Pfkl	Pfkl	-0.727959	0.988165	0.168611	-1.77952	0.0837923	0.445039	1.90104				6	7	19.8006	20.5285	19.8334	20.4918	1.04696	0.278827	0.0528753	0.0135824	20.5448	20.4918	21.0989	20.3217	20.4033	20.589	20.2503	20.2663	NaN	18.0029	21.2079	19.7118	19.9549	19.6597	+			+
P13808	Slc4a2	Anion exchange protein 2	Slc4a2	Slc4a2	0.00665029	0.0124547	1	0.0367255	1.23458	0.116796	1.64995				3	6	18.3033	18.2966	18.4391	18.2852	0.308219	0.231977	0.0168395	0.0126787	18.0744	18.312	18.2583	NaN	18.0205	18.5036	18.6111	18.5203	NaN	NaN	17.9505	18.4391	NaN	NaN		+					+
P13864	Dnmt1	DNA (cytosine-5)-methyltransferase 1	Dnmt1	Dnmt1	-0.485388	0.938005	0.179573	-1.7097	0.151738	1.05117	1.77851				6	7	19.3931	19.8785	19.6202	19.8077	0.692487	0.278909	0.0357079	0.0140307	19.7586	19.9962	19.6085	20.1489	20.2921	19.5373	19.8077	19.577	NaN	19.7195	20.0154	19.3291	18.0541	19.6634		+				+
P14733	Lmnb1	Lamin-B1	Lmnb1	Lmnb1	0.0115572	0.0233317	1	0.066988	1.51781	2.07762	1.7907				7	7	24.2709	24.2593	24.3484	24.1676	0.386677	0.242564	0.0159317	0.00999879	24.1584	24.1676	23.9742	24.7209	24.102	24.335	24.3573	24.2923	24.4551	23.4333	24.3334	24.3484	24.6398	24.394		+					+
P18242	Ctsd	Cathepsin D	Ctsd	Ctsd	0.258177	0.382494	0.516453	0.851377	1.12358	1.75809	1.75084				5	7	22.0282	21.77	21.8066	21.6624	0.659382	0.39644	0.0299335	0.0182103	21.6624	21.6519	21.2282	22.4382	21.9724	21.9747	21.4625	21.7674	22.4491	NaN	NaN	21.2096	21.8066	22.9084
P21619	Lmnb2	Lamin-B2	Lmnb2	Lmnb2	0.00558553	0.0155537	1	0.0450352	1.13023	1.81301	1.30634				7	7	22.0332	22.0277	21.9229	22.0286	0.325064	0.0448397	0.0147533	0.00203561	22.0601	22.0638	21.9625	22.0274	21.9734	22.0778	22.0286	22.2258	21.7287	21.711	21.783	22.3611	22.5002	21.9229
P23116	Eif3a	Eukaryotic translation initiation factor 3 subunit A	Eif3a	Eif3a	-0.130014	0.412455	0.48157	-0.897993	1.26624	2.16049	2.45908				7	7	21.552	21.682	21.3918	21.7369	0.356998	0.138876	0.0165645	0.00640513	21.5913	21.7626	21.7589	21.4353	21.8527	21.6365	21.7369	21.3559	21.3918	22.3006	21.6886	21.5119	21.2921	21.3232
P27573	Mpz	Myelin protein P0	Mpz	Mpz	1.07859	0.975545	0.169557	1.7976	0.35508	0.273469	2.22718				4	7	21.1927	20.1141	21.3288	20.174	0.582412	1.09773	0.0274817	0.0545752	20.0906	20.7698	21.2412	18.0571	19.4374	21.0287	20.174	21.6132	NaN	21.0444	21.6818	NaN	20.4314	NaN
P28078	H2-DMa	Class II histocompatibility antigen, M alpha chain	H2-DMa	H2-DMa	0.916007	1.0235	0.158876	1.86712	0.355854	3.11664	1.93196				5	6	21.3389	20.4229	21.1561	20.0826	0.873771	0.755494	0.0409473	0.0369924	NaN	20.1338	20.0313	21.6186	19.8932	19.7571	21.1036	NaN	21.5476	NaN	20.7905	20.4734	21.1561	22.7271		+					+
P35831	Ptpn12	Tyrosine-protein phosphatase non-receptor type 12	Ptpn12	Ptpn12	-0.857032	0.970908	0.170009	-1.79084	0.225776	0.147061	1.71076				4	7	19.0121	19.8692	19.2654	19.9298	0.579264	0.84064	0.0304681	0.0423088	19.3895	20.3745	19.9298	18.5226	21.2118	20.0845	19.5714	19.3189	NaN	NaN	19.2119	18.1488	NaN	19.3689	+		+
P39054	Dnm2	Dynamin-2	Dnm2	Dnm2	-0.228843	1.16572	0.130322	-2.00314	0.180964	0.969563	1.6828				7	7	22.5455	22.7744	22.5422	22.8333	0.222987	0.204048	0.0098905	0.00895955	22.5512	22.8541	23.0696	22.5231	22.9344	22.6549	22.8333	22.3619	22.2347	22.6691	22.7142	22.8754	22.5422	22.4212
P42208	2002-09-01	Septin-2	2002-09-01	2002-09-01	-0.677729	1.13735	0.133355	-1.96583	0.39918	0.0956801	1.87748				7	7	20.6983	21.376	20.5427	21.4888	0.855397	0.316682	0.0413269	0.0148148	21.7589	21.5216	21.4888	20.9587	21.2963	20.9646	21.6433	21.7667	20.529	19.5419	20.9958	20.5427	19.817	21.695
P42232	Stat5b	Signal transducer and activator of transcription 5B	Stat5b	Stat5b	-0.43014	1.1227	0.133937	-2.00951	0.115239	0.644416	1.81463				4	7	19.2624	19.6925	19.3129	19.6993	0.391909	0.313281	0.0203458	0.0159086	19.6828	19.6993	19.9239	19.0933	19.998	19.5243	19.926	19.2855	NaN	NaN	19.6857	18.738	NaN	19.3403
P42669	Pura	Transcriptional activator protein Pur-alpha	Pura	Pura	-0.121386	0.427427	0.468347	-0.923901	1.1063	4.31374	2.36193				7	7	22.0034	22.1248	21.9484	22.191	0.186702	0.293214	0.00848513	0.0132527	22.191	22.357	22.2459	22.5201	21.8885	21.6574	22.0138	22.2624	21.9484	21.8336	21.7666	21.9142	22.1073	22.1915
P46061	Rangap1	Ran GTPase-activating protein 1	Rangap1	Rangap1	-0.481514	1.07096	0.144535	-1.87776	0.0792045	0.284642	1.61674				7	7	20.4947	20.9763	20.7471	20.9403	0.667225	0.122913	0.0325559	0.00585962	21.1982	20.8719	20.8951	20.9403	21.0583	21.014	20.856	20.9791	20.1473	19.3073	21.3095	20.7849	20.188	20.7471
P46935	Nedd4	E3 ubiquitin-protein ligase NEDD4	Nedd4	Nedd4	-0.292514	1.17387	0.129848	-2.01382	0.251729	0.689572	1.47935				7	7	21.588	21.8806	21.5856	21.8462	0.338263	0.182394	0.015669	0.00833588	21.7965	22.0127	21.8462	21.6013	21.9387	21.7958	22.1727	21.5856	21.105	21.7881	21.4062	21.3985	21.663	22.1699											+
P47915	Rpl29	60S ribosomal protein L29	Rpl29	Rpl29	0.276086	0.193824	0.755703	0.479804	0.713134	0.38976	1.35295				7	7	23.2539	22.9778	23.3642	23.0663	1.1382	1.01105	0.0489464	0.0440012	23.4749	22.1231	22.2154	24.7952	21.8939	23.0663	23.2759	23.6564	24.4859	21.8859	22.7654	23.3642	24.7177	21.9018
P48428	Tbca	Tubulin-specific chaperone A	Tbca	Tbca	0.6247	0.699664	0.273447	1.36448	0.305047	0.12704	2.04939				6	7	22.0376	21.4129	21.9863	21.252	1.067	0.541113	0.048417	0.0252704	21.5306	21.252	20.8097	22.4183	20.9477	21.7113	21.2207	21.6019	22.3351	NaN	20.4142	21.6375	23.494	22.7429
P49718	Mcm5	DNA replication licensing factor MCM5	Mcm5	Mcm5	-0.340257	0.582595	0.340528	-1.17845	0.0650864	0.719642	1.40842				7	7	20.7527	21.0929	21.0489	21.0775	0.729414	0.226996	0.035148	0.0107617	20.8808	20.943	21.2458	21.5195	21.0805	21.0775	20.9033	21.268	21.1147	19.1941	21.2074	21.0489	20.5313	20.9042
P49962	Srp9	Signal recognition particle 9 kDa protein	Srp9	Srp9	1.64847	0	1	0	1.51239	0.668407	1.80392				1	3	19.499	17.8505	19.499	17.9246	NaN	0.424376	NaN	0.0237739	NaN	NaN	NaN	NaN	17.394	18.233	17.9246	NaN	NaN	NaN	NaN	NaN	NaN	19.499
P51410	Rpl9	60S ribosomal protein L9	Rpl9	Rpl9	0.835285	1.11301	0.134309	1.93367	0.269178	1.18353	1.65212				7	7	23.0535	22.2182	23.2755	22.2477	0.719804	0.887732	0.0312232	0.0399551	22.7945	22.2477	21.3073	23.6318	21.3954	22.7273	21.4237	23.2755	23.8465	22.2975	21.8375	23.1507	23.5073	23.4597											+
P52800	Efnb2	Ephrin-B2	Efnb2	Efnb2	0.742875	0.948924	0.175706	1.75877	0.248876	0.481665	1.69617				4	7	18.1855	17.4426	18.3966	17.2698	1.03283	0.384475	0.0567944	0.0220423	17.8067	17.2148	17.6102	16.9462	17.2182	18.0323	17.2698	18.5313	NaN	NaN	16.7525	19.1961	18.262	NaN
P53986	Slc16a1	Monocarboxylate transporter 1	Slc16a1	Slc16a1	0.5185	0.808456	0.22452	1.5505	0.0994592	1.3127	1.76829				4	7	19.1449	18.6264	19.1918	18.6532	0.605296	0.49375	0.0316166	0.0265081	18.8102	18.1302	18.6532	18.4625	17.9674	19.4114	18.9499	19.2405	NaN	NaN	19.1432	19.8347	NaN	18.3612
P54754	Ephb3	Ephrin type-B receptor 3	Ephb3	Ephb3	-1.1188	0	1	0	0.706043	0.0120771	1.37962				1	5	16.3588	17.4776	16.3588	17.4939	NaN	0.379155	NaN	0.0216938	NaN	17.4939	17.4608	NaN	16.8594	17.7655	17.8084	NaN	NaN	NaN	NaN	16.3588	NaN	NaN
P56404	Aqp8	Aquaporin-8	Aqp8	Aqp8	1.08427	1.06078	0.146427	1.98962	0.212496	0.0719512	1.58893				4	5	21.0943	20.0101	20.9615	19.9262	1.01637	0.616594	0.0481819	0.0308142	19.3432	19.5245	20.4426	19.9262	NaN	20.8139	NaN	21.1175	NaN	NaN	20.0066	22.4478	20.8055	NaN
P56480	Atp5f1b	ATP synthase subunit beta, mitochondrial	Atp5f1b	Atp5f1b	-0.599443	1.0089	0.160335	-1.79434	0.133048	2.07694	1.66265				7	7	25.5866	26.1861	25.8865	26.1655	0.829239	0.305939	0.0324091	0.0116833	26.1655	26.2663	26.8196	25.9922	26.1667	25.9341	25.9582	26.2351	26.1889	23.9638	26.0494	25.7968	25.8865	24.986
P57780	Actn4	Alpha-actinin-4	Actn4	Actn4	-0.309043	0.977897	0.170972	-1.75224	0.0217709	1.35696	2.01427				7	7	24.2823	24.5914	24.2572	24.6361	0.360015	0.296875	0.0148262	0.0120723	24.9406	24.6361	24.8491	24.0222	24.6475	24.5511	24.4929	24.5906	24.2198	24.8211	24.2572	24.3849	23.9048	23.7978
P59708	Sf3b6	Splicing factor 3B subunit 6	Sf3b6	Sf3b6	0.141598	0.279199	0.636086	0.655245	1.21281	1.68793	1.74425				6	7	21.5852	21.4436	21.6347	21.4733	0.335313	0.427675	0.0155344	0.0199442	21.76	21.3494	20.9313	22.1198	20.9345	21.5368	21.4733	22.0683	21.2632	NaN	21.1501	21.7602	21.6229	21.6464
P59808	Sash1	SAM and SH3 domain-containing protein 1	Sash1	Sash1	-0.379234	0	1	0	1.04739	1.2417	1.34856				1	3	15.973	16.3522	15.973	16.3241	NaN	0.2971	NaN	0.0181688	NaN	NaN	16.6624	NaN	16.3241	NaN	16.0702	NaN	NaN	NaN	NaN	15.973	NaN	NaN
P60670	Nploc4	Nuclear protein localization protein 4 homolog	Nploc4	Nploc4	-0.481857	0.74623	0.249936	-1.42594	0.0106289	0.0684542	1.38545				7	7	19.6348	20.1167	19.8365	20.1984	0.787105	0.424036	0.0400872	0.0210788	19.1974	20.1709	20.4282	20.4373	20.1121	20.2725	20.1984	19.3987	20.2265	18.006	19.7179	20.3762	19.8365	19.882
P61021	Rab5b	Ras-related protein Rab-5B	Rab5b	Rab5b	0.318653	0.952576	0.176965	1.73006	0.459561	0.840186	1.43089				6	7	21.3623	21.0436	21.2964	20.9938	0.422876	0.227851	0.0197955	0.0108276	20.8006	21.1691	21.1168	21.4611	20.8481	20.9938	20.9158	21.0265	21.9022	NaN	20.9138	21.5597	21.0331	21.7383
P61358	Rpl27	60S ribosomal protein L27	Rpl27	Rpl27	-0.540028	0.695473	0.275156	-1.35101	0.139815	0.357085	1.74937				7	7	23.3125	23.8526	23.5718	23.8158	0.978829	0.400429	0.0419872	0.0167877	24.2165	23.9074	23.8158	24.3618	23.8009	23.1081	23.7575	24.3154	21.9938	23.6923	21.9861	23.5718	23.2996	24.3288
P62141	Ppp1cb	Serine/threonine-protein phosphatase PP1-beta catalytic subunit	Ppp1cb	Ppp1cb	-0.601886	1.01291	0.160676	-1.79977	0.0661103	1.67774	1.63944				7	7	21.7248	22.3267	21.644	22.2903	0.728297	0.502452	0.0335238	0.0225046	21.8773	22.7988	22.795	21.5263	22.7901	22.2088	22.2903	21.644	21.4623	21.391	23.1149	21.7897	20.7208	21.9507
P62774	Mtpn	Myotrophin	Mtpn	Mtpn	0.385197	0.442581	0.457041	0.953281	1.31539	0.266427	2.72934				6	7	21.3136	20.9284	21.3917	20.712	0.678266	0.764022	0.0318232	0.0365065	20.712	20.6946	20.1171	22.2091	20.0686	21.4194	21.2779	21.831	20.5696	NaN	20.9653	21.8181	22.0906	20.6069
P62876	Polr2l	DNA-directed RNA polymerases I, II, and III subunit RPABC5	Polr2l	Polr2l	0.0287669	0.0485416	1	0.138669	2.15948	2.57014	1.52144				2	6	19.121	19.0922	19.121	19.0406	0.436709	0.198296	0.0228392	0.0103862	NaN	19.0578	18.9526	19.1015	19.4772	18.9409	19.0234	NaN	NaN	NaN	NaN	18.8122	NaN	19.4298
P62911	Rpl32	60S ribosomal protein L32	Rpl32	Rpl32	-0.730086	1.11895	0.134639	-1.94153	0.0363047	0.479483	1.71441				7	7	21.9933	22.7234	22.0301	22.4913	0.796284	0.596449	0.0362058	0.0262483	21.932	22.4913	23.3431	23.6233	22.8966	22.4454	22.332	21.9224	22.8476	22.9131	21.052	22.0301	20.8808	22.3071
P62915	Gtf2b	Transcription initiation factor IIB	Gtf2b	Gtf2b	0.306833	0.847657	0.203091	1.62874	0.682534	1.02809	1.31096				3	7	18.9504	18.6436	19.0598	18.5976	0.385565	0.223198	0.020346	0.0119719	18.5836	18.6645	18.4738	18.3314	18.9803	18.5976	18.874	19.2695	NaN	NaN	NaN	19.0598	NaN	18.522	+		+
P62965	Crabp1	Cellular retinoic acid-binding protein 1	Crabp1	Crabp1	1.72042	0	1	0	0.146545	2.19862	2.40077				1	5	20.0054	18.285	20.0054	18.5573	NaN	0.590393	NaN	0.0322884	NaN	18.9344	NaN	17.5631	18.6077	18.5573	17.7624	NaN	NaN	NaN	NaN	NaN	NaN	20.0054
P63073	Eif4e	Eukaryotic translation initiation factor 4E	Eif4e	Eif4e	-0.214314	0.509924	0.394465	-1.06213	0.681269	1.95199	2.03017				7	7	21.3382	21.5525	21.2761	21.5561	0.400189	0.353337	0.0187546	0.0163942	21.2263	21.2267	22.0058	22.0214	21.6078	21.5561	21.2237	21.2761	20.782	21.8899	21.7841	20.9932	21.2096	21.4327
P63158	Hmgb1	High mobility group protein B1	Hmgb1	Hmgb1	-0.387128	0.60107	0.328522	-1.20731	0.0800958	0.948145	1.30467				7	7	22.1798	22.5669	22.4388	22.6024	0.808631	0.256599	0.036458	0.0113706	22.82	22.3627	22.5647	22.6024	22.6446	22.1201	22.8539	22.8315	21.5184	20.7038	22.2019	22.5704	22.4388	22.9937
P63325	Rps10	40S ribosomal protein S10	Rps10	Rps10	-0.233057	0.271863	0.644532	-0.639155	1.04825	0.088761	2.08219				7	7	21.4811	21.7142	21.5092	21.9034	0.796298	0.544621	0.0370697	0.0250814	22.3358	21.9069	22.0771	20.6626	21.9034	21.4279	21.6854	21.5092	20.4637	22.8728	21.7558	21.061	20.8297	21.8755
P68040	Rack1	Receptor of activated protein C kinase 1	Rack1	Rack1	-0.308371	0.643801	0.30635	-1.27311	0.2318	0.389996	1.3921				7	7	23.1946	23.503	23.4276	23.5663	0.589325	0.251769	0.0254078	0.0107122	23.8143	23.1857	23.6884	23.3033	23.7091	23.5663	23.254	23.4276	21.965	23.5841	23.1163	23.0579	23.5676	23.644
P70195	Psmb7	Proteasome subunit beta type-7	Psmb7	Psmb7	-0.0914739	0.1296	0.853171	-0.337635	1.87806	0.701406	1.47564				6	7	21.9611	22.0526	22.044	22.0141	0.619417	0.339156	0.0282052	0.0153794	22.0568	21.6984	22.0141	22.4054	21.8138	22.6045	21.7749	21.8831	21.601	NaN	21.0018	22.2049	22.8002	22.2755
P70202	Lxn	Latexin	Lxn	Lxn	0.327993	0.66038	0.297284	1.32261	1.01225	0.575151	2.58193				4	7	19.4987	19.1707	19.5406	19.2109	0.414639	0.38581	0.021265	0.020125	19.2109	18.8073	19.4142	19.192	19.2647	19.7402	18.5653	19.4117	NaN	NaN	NaN	18.9691	19.6695	19.9443
P70333	Hnrnph2	Heterogeneous nuclear ribonucleoprotein H2	Hnrnph2	Hnrnph2	-0.194005	0.303615	0.604302	-0.707725	2.07678	0.260802	1.49059				4	7	21.0686	21.2626	20.9844	21.2879	0.611399	0.316244	0.0290194	0.0148732	21.7847	21.1422	21.2879	20.8327	21.4722	20.9829	21.3358	21.8555	NaN	NaN	20.4502	20.7546	NaN	21.2142
P70353	Nfyc	Nuclear transcription factor Y subunit gamma	Nfyc	Nfyc	0.41836	0.544585	0.366319	1.13581	0.227542	1.26354	1.51467				5	6	20.1534	19.735	19.9078	19.6642	0.766868	0.442211	0.0380516	0.0224075	NaN	19.7258	19.6027	20.5524	19.8135	19.3323	19.3833	19.3158	NaN	NaN	19.6629	19.9078	20.7036	21.1767
P70677	Casp3	Caspase-3	Casp3	Casp3	0.325676	0.888636	0.189913	1.64015	0.556496	0.312364	2.45246				6	7	22.0422	21.7166	22.0801	21.7796	0.422142	0.291604	0.0191515	0.0134277	21.7796	21.7791	21.8386	21.8594	21.3587	22.1116	21.2889	21.6618	22.3284	NaN	21.5171	22.4615	22.4528	21.8318
P85094	Isoc2a	Isochorismatase domain-containing protein 2A	Isoc2a	Isoc2a	-0.105116	0.247522	0.680475	-0.614843	1.33244	0.537006	2.03477				3	4	17.581	17.6862	17.6296	17.6358	0.190452	0.243577	0.0108328	0.0137722	17.4999	NaN	17.9924	NaN	17.7716	17.4807	NaN	17.371	NaN	NaN	17.6296	NaN	NaN	17.7425
P97379	G3bp2	Ras GTPase-activating protein-binding protein 2	G3bp2	G3bp2	-0.00425747	0.0124581	1	-0.0361954	1.82611	1.43797	2.08139				7	7	22.3893	22.3936	22.4273	22.3653	0.274808	0.146047	0.0122741	0.00652185	22.3817	22.3653	22.3572	22.7064	22.3085	22.2502	22.3857	22.3223	21.8516	22.6665	22.4273	22.4369	22.3527	22.6679
P97450	Atp5j	ATP synthase-coupling factor 6, mitochondrial	Atp5j	Atp5j	0.129655	0.166219	0.79299	0.420814	1.33466	1.15667	1.9978				6	7	22.3844	22.2547	22.0967	22.2947	0.752987	0.299628	0.0336389	0.0134636	22.0956	22.3958	22.2947	22.5524	21.6864	22.5361	22.2221	22.069	22.0765	NaN	21.5315	22.8552	23.6572	22.1169
P97452	Bop1	Ribosome biogenesis protein BOP1	Bop1	Bop1	-0.264203	0.596951	0.330502	-1.22141	0.1082	1.22106	1.35427				4	7	18.6944	18.9586	18.6946	18.9214	0.296888	0.366853	0.0158811	0.0193502	19.3801	18.7239	18.6815	19.1595	19.3982	18.4458	18.9214	18.9779	NaN	NaN	18.9221	18.4671	NaN	18.4106
P97461	Rps5	40S ribosomal protein S5	Rps5	Rps5	0.3115	0.808082	0.223704	1.51537	0.211828	4.18551	1.97387				7	7	23.7893	23.4778	23.7097	23.3925	0.425673	0.338505	0.0178935	0.0144181	23.3925	23.3129	23.3161	24.226	23.4373	23.4342	23.2257	23.3307	23.7097	23.4194	23.7036	23.8098	23.9209	24.6311
P97770	Thumpd3	THUMP domain-containing protein 3	Thumpd3	Thumpd3	0.188128	0.692519	0.275797	1.3537	0.701376	2.9644	1.92998				6	7	19.9188	19.7307	19.8849	19.745	0.333783	0.146811	0.0167572	0.00744075	19.7226	19.5474	19.797	19.8082	19.9528	19.745	19.5417	20.0344	19.7353	NaN	20.3634	19.5552	20.2123	19.6122
P97797	Sirpa	Tyrosine-protein phosphatase non-receptor type substrate 1	Sirpa	Sirpa	0.184011	0.235557	0.692969	0.569845	1.24835	5.241	1.46486				5	7	20.2466	20.0626	20.2053	19.9829	0.74304	0.372573	0.0366994	0.0185705	19.6658	20.0983	19.6629	20.5926	19.9829	19.9189	20.517	19.8606	20.2053	NaN	20.4238	19.373	NaN	21.3705
P97821	Ctsc	Dipeptidyl peptidase 1	Ctsc	Ctsc	0.775219	0.96873	0.170429	1.75256	0.0446716	2.60322	1.92292				6	7	23.5544	22.7792	23.5284	22.7748	0.997008	0.574942	0.0423278	0.0252398	22.2414	22.7663	22.0847	23.8745	22.7748	22.8571	22.8557	23.0237	24.2423	22.3601	NaN	22.7374	24.0331	24.93											+
P98078	Dab2	Disabled homolog 2	Dab2	Dab2	-0.427507	0.833816	0.209184	-1.56184	0.0439189	1.93614	1.58844				6	7	19.6625	20.09	19.5288	20.1193	0.591063	0.390695	0.0300605	0.0194473	19.9713	20.2611	20.0004	19.3338	20.4661	20.1193	20.4777	19.849	19.331	19.7001	19.3574	19.0252	NaN	20.712	+		+
Q00PI9	Hnrnpul2	Heterogeneous nuclear ribonucleoprotein U-like protein 2	Hnrnpul2	Hnrnpul2	0.249629	0.913266	0.183722	1.66341	0.228509	0.239302	1.4464				7	7	22.1158	21.8662	22.1143	21.8613	0.325035	0.228033	0.0146969	0.0104286	21.5921	21.905	21.8551	22.3116	21.6743	21.8639	21.8613	22.0611	22.0986	21.4849	22.5607	22.2674	22.2237	22.1143
Q01768	Nme2	Nucleoside diphosphate kinase B	Nme2	Nme2	-0.319142	1.21557	0.123429	-2.06827	0.27343	0.0431307	2.23603				7	7	22.9831	23.3023	23.1473	23.195	0.323201	0.249419	0.0140625	0.0107036	23.7941	23.1404	23.195	23.4499	23.2993	23.1654	23.0718	23.325	23.1473	23.2164	22.5665	22.7665	22.612	23.2482
Q02614	Sap30bp	SAP30-binding protein	Sap30bp	Sap30bp	0.00925001	0.031257	1	0.0903278	2.38065	1.27824	2.51836				3	6	18.261	18.2517	18.234	18.249	0.118181	0.154195	0.00647178	0.00844827	NaN	18.2839	18.1912	18.4329	18.214	18.0027	18.3856	NaN	NaN	NaN	18.3903	18.1586	NaN	18.234
Q04207	Rela	Transcription factor p65	Rela	Rela	0.460495	0.781611	0.23488	1.48609	0.0178604	3.08045	1.57436				6	7	20.6318	20.1713	20.7739	20.2823	0.594336	0.523803	0.0288069	0.0259678	20.4435	19.0592	20.1275	20.6565	20.464	20.2823	20.1659	20.8813	21.2941	NaN	20.0278	19.8122	21.1088	20.6664	+		+
Q05915	Gch1	GTP cyclohydrolase 1	Gch1	Gch1	-0.2268	0.354369	0.545633	-0.814445	0.194365	2.98554	1.79333				3	6	18.0264	18.2532	18.0342	18.1616	0.234797	0.441676	0.0130252	0.0241972	NaN	18.2234	18.5476	18.0998	18.9725	17.8699	17.806	18.0342	NaN	NaN	17.7878	18.2572	NaN	NaN	+				+
Q09200	B4galnt1	Beta-1,4 N-acetylgalactosaminyltransferase 1	B4galnt1	B4galnt1	0.0691069	0.0587734	0.983007	0.163906	1.18555	0.296158	1.57355				4	7	18.5156	18.4464	18.2773	18.2905	0.589698	0.710547	0.0318488	0.0385194	19.8579	17.5683	18.2905	18.0344	18.5904	18.2416	18.542	19.3847	NaN	NaN	18.1769	18.123	NaN	18.3776		+				+
Q14B01	Rnf113a2	Ring finger protein 113A2	Rnf113a2	Rnf113a2	-1.0758	0	1	0	0.4561	1.7227	1.75519				1	3	17.4194	18.4952	17.4194	18.5194	NaN	0.0521009	NaN	0.002817	NaN	NaN	18.5194	NaN	18.5308	NaN	18.4354	NaN	NaN	NaN	17.4194	NaN	NaN	NaN
Q3TBT3	Tmem173	Stimulator of interferon genes protein	Tmem173	Tmem173	-0.644435	0	1	0	1.12141	2.66925	1.93289				1	6	19.4495	20.0939	19.4495	20.1954	NaN	0.597524	NaN	0.0297365	19.797	20.3559	20.035	20.4062	20.8518	19.1177	NaN	19.4495	NaN	NaN	NaN	NaN	NaN	NaN
Q3TBW2	Mrpl10	39S ribosomal protein L10, mitochondrial	Mrpl10	Mrpl10	-4.4869	0	1	0	0.305263	1.213	1.30594				1	2	12.7374	17.2243	12.7374	17.2243	NaN	1.49327	NaN	0.0866954	NaN	NaN	18.2802	NaN	NaN	NaN	16.1684	NaN	12.7374	NaN	NaN	NaN	NaN	NaN
Q3TCH7	Cul4a	Cullin-4A	Cul4a	Cul4a	-0.414579	0.958498	0.175378	-1.73832	0.321052	1.66453	2.66125				6	7	18.3162	18.7308	18.3848	18.7919	0.582739	0.232193	0.0318154	0.0123963	18.8539	18.5602	18.7919	18.4794	18.4866	19.1068	18.837	19.1141	18.3023	NaN	18.095	18.5655	17.3533	18.4673
Q3TCJ1	Abraxas2	BRISC complex subunit Abraxas 2	Abraxas2	Abraxas2	0.340686	1.12516	0.134106	2.04609	0.477835	0.611577	1.36956				3	7	19.4002	19.0595	19.465	19.1125	0.184159	0.257532	0.00949261	0.013512	18.8363	19.3698	18.7177	19.1125	18.8555	19.3266	19.1982	19.5432	NaN	NaN	19.465	19.1924	NaN	NaN
Q3TCN2	Plbd2	Putative phospholipase B-like 2	Plbd2	Plbd2	0.238926	0.457356	0.441794	0.978505	0.972339	0.555119	2.38721				6	7	19.9834	19.7445	19.7808	19.6571	0.549997	0.317899	0.0275227	0.0161007	19.619	19.6937	20.0249	20.3151	19.6571	19.4086	19.4928	20.1537	19.8291	NaN	19.5423	19.6235	19.7326	21.0191
Q3TGF2	Fam107b	Protein FAM107B	Fam107b	Fam107b	0.656329	0.659647	0.296319	1.30372	0.0809836	0.871042	1.39281				6	7	19.6849	19.0286	19.732	18.9421	0.97952	0.837613	0.04976	0.0440187	18.6552	18.9011	17.4744	20.0009	18.9421	19.5807	19.6456	19.4589	19.7901	NaN	18.0049	19.674	20.2223	20.9592
Q3TTY5	Krt2	Keratin, type II cytoskeletal 2 epidermal	Krt2	Krt2	1.17519	1.19216	0.126272	2.03775	0.0585346	0.405791	2.00084				7	7	26.5476	25.3724	26.934	25.3614	1.33584	0.737345	0.0503186	0.0290609	25.3614	25.099	24.3835	26.8047	25.0187	25.5526	25.3869	26.1955	26.9357	26.9356	24.2604	25.9056	28.6663	26.934											+
Q3U962	Col5a2	Collagen alpha-2(V) chain	Col5a2	Col5a2	-0.254057	0.299761	0.608452	-0.693064	2.2331	0.268693	1.65871				7	7	21.8932	22.1473	22.1051	22.1745	0.753293	0.610874	0.0344076	0.0275824	22.8371	22.2012	22.1745	22.0479	21.37	21.4451	22.955	22.2998	21.5558	22.1051	22.379	22.03	22.5408	20.3419
Q3UD01	Atxn7l3b	Ataxin-7-like protein 3B	Atxn7l3b	Atxn7l3b	1.19514	1.21854	0.12481	2.23572	0.157024	0.470033	2.25859				4	5	19.6579	18.4627	19.6775	18.6754	0.369388	1.00447	0.0187908	0.054405	18.8061	17.336	NaN	19.8527	NaN	18.6754	17.6435	19.2898	NaN	NaN	NaN	19.3903	19.9867	19.9647
Q3UFS0	Zyg11b	Protein zyg-11 homolog B	Zyg11b	Zyg11b	-0.48	0	1	0	1.18705	0.793114	1.48198				1	4	17.2174	17.6974	17.2174	17.6983	NaN	0.355149	NaN	0.0200679	NaN	NaN	18.0537	NaN	17.9465	17.3393	17.4501	NaN	NaN	NaN	NaN	17.2174	NaN	NaN
Q3UHX2	Pdap1	28 kDa heat- and acid-stable phosphoprotein	Pdap1	Pdap1	0.596324	1.04524	0.150335	1.85806	0.337137	1.58407	1.74328				6	7	21.8749	21.2785	21.7365	21.452	0.57418	0.579094	0.0262484	0.0272149	21.4653	21.3327	20.3204	21.9919	20.6923	21.6952	21.452	21.6034	21.8616	NaN	21.1505	21.6113	22.8032	22.2192
Q3UIU2	Ndufb6	NADH dehydrogenase [ubiquinone] 1 beta subcomplex subunit 6	Ndufb6	Ndufb6	0.26576	0.356664	0.547373	0.801376	0.583282	1.02096	1.54337				6	7	22.1316	21.8659	22.3013	21.7395	0.610983	0.583373	0.0276068	0.0266796	21.0964	21.5084	22.6354	22.2825	21.7395	22.4181	21.3807	22.5458	21.2314	NaN	21.5799	22.4333	22.83	22.1693
Q3UMU9	Hdgfl2	Hepatoma-derived growth factor-related protein 2	Hdgfl2	Hdgfl2	0.34725	0.621736	0.319674	1.24521	0.468437	0.901405	1.42409				6	7	21.0646	20.7173	21.2332	20.6573	0.596872	0.404649	0.0283354	0.0195319	21.3909	20.3837	20.2366	20.8463	20.6573	20.4672	21.0391	21.1873	21.3771	NaN	19.8854	21.1147	21.2791	21.5437
Q499E6	C1orf109	Uncharacterized protein C1orf109 homolog	C1orf109	C1orf109	-1.67007	0	1	0	0.955583	0.549182	2.90996				1	3	15.1885	16.8586	15.1885	16.886	NaN	0.191033	NaN	0.0113315	NaN	NaN	16.886	NaN	17.0344	NaN	16.6553	NaN	NaN	NaN	NaN	NaN	NaN	15.1885
Q501J6	Ddx17	Probable ATP-dependent RNA helicase DDX17	Ddx17	Ddx17	-0.353598	0.772776	0.237381	-1.47314	0.0905419	0.340328	1.43067				6	7	21.3105	21.6641	21.4669	21.6079	0.615998	0.158247	0.0289058	0.00730456	21.5658	21.7005	21.571	21.6079	21.645	21.5551	22.0035	21.6982	NaN	20.2638	21.2355	21.7866	21.0003	21.8787
Q570Y9	Deptor	DEP domain-containing mTOR-interacting protein	Deptor	Deptor	-0.250821	0.393323	0.504422	-0.875086	1.27156	3.32042	1.76656				4	7	19.1499	19.4007	19.2732	19.4932	0.632052	0.337539	0.0330056	0.0173983	19.6969	19.6326	19.696	18.7732	19.1825	19.4932	19.3303	19.7348	NaN	NaN	19.0139	19.5324	NaN	18.3183
Q60692	Psmb6	Proteasome subunit beta type-6	Psmb6	Psmb6	0.405685	0.59152	0.334456	1.19242	0.427526	0.800926	1.86851				7	7	23.9671	23.5614	23.9186	23.5273	0.779605	0.449955	0.0325282	0.0190971	23.7229	23.5273	23.1813	24.4318	23.2768	23.6676	23.1219	23.8624	24.2133	22.6267	23.5812	23.9186	25.1669	24.4003											+
Q60737	Csnk2a1	Casein kinase II subunit alpha	Csnk2a1	Csnk2a1	-0.263586	0.778754	0.235652	-1.47321	0.177324	0.922857	1.58				7	7	20.5825	20.8461	20.6953	20.7593	0.430687	0.196453	0.0209249	0.00942399	21.0217	20.7565	21.0732	21.0288	20.7593	20.5507	20.7323	21.0995	19.8389	20.2179	20.553	20.7435	20.6953	20.9293
Q60793	Klf4	Krueppel-like factor 4	Klf4	Klf4	0.1168	0	1	0	3.34707	2.32642	2.98818				1	1	17.4552	17.3384	17.4552	17.3384	NaN	NaN	NaN	NaN	17.3384	NaN	NaN	NaN	NaN	NaN	NaN	17.4552	NaN	NaN	NaN	NaN	NaN	NaN		+					+
Q60838	Dvl2	Segment polarity protein dishevelled homolog DVL-2	Dvl2	Dvl2	-3.69512	0	1	0	1.86848	0.611391	2.61297				1	5	14.126	17.8211	14.126	17.7307	NaN	0.538568	NaN	0.0302208	NaN	17.3099	18.1129	NaN	17.7307	18.5915	17.3606	NaN	NaN	NaN	NaN	14.126	NaN	NaN
Q60865	Caprin1	Caprin-1	Caprin1	Caprin1	0.0556451	0.0936135	0.919441	0.251458	1.34312	2.48103	1.58105				6	7	21.2798	21.2242	21.3236	21.2262	0.393582	0.401197	0.0184956	0.0189028	21.2262	21.2714	20.6279	21.9496	21.0002	21.1234	21.3705	21.1838	21.1433	NaN	20.61	21.6939	21.4633	21.5846
Q60870	Reep5	Receptor expression-enhancing protein 5	Reep5	Reep5	-0.522857	1.10005	0.137157	-1.91648	0.275056	0.224897	2.95841				7	7	20.154	20.6769	19.975	20.711	0.65039	0.31307	0.032271	0.0151411	20.0898	20.5393	20.5935	20.9949	20.711	20.8293	20.9802	19.189	19.9556	19.8547	20.851	20.1195	19.975	21.1332
Q60930	Vdac2	Voltage-dependent anion-selective channel protein 2	Vdac2	Vdac2	0.167543	0.48258	0.417988	1.01711	0.308899	2.80488	1.58538				7	7	24.6571	24.4896	24.8387	24.5857	0.337167	0.276145	0.0136742	0.011276	24.5857	24.3132	24.7038	24.7422	24.1476	24.7752	24.1595	24.8387	24.9529	24.4364	24.3562	24.9454	24.9286	24.1418
Q61009	Scarb1	Scavenger receptor class B member 1	Scarb1	Scarb1	NaN	0	1	0	1.83574	1.83574	1.83574				0	6	NaN	18.0589	NaN	18.0332	NaN	0.154153	NaN	0.00853609	17.9781	18.0884	17.9035	NaN	18.3335	17.9559	18.0943	NaN	NaN	NaN	NaN	NaN	NaN	NaN
Q61142	Spin1	Spindlin-1	Spin1	Spin1	0.646446	0.862634	0.197683	1.71481	0.0845139	1.12127	1.74977				3	5	18.5603	17.9138	18.5143	18.0575	0.600372	0.468473	0.0323472	0.0261515	NaN	18.13	NaN	17.1698	18.0575	17.8033	18.4085	18.5143	NaN	NaN	NaN	17.9842	NaN	19.1823
Q61193	Rgl2	Ral guanine nucleotide dissociation stimulator-like 2	Rgl2	Rgl2	0.406217	0.42397	0.470905	0.943733	0.555431	0.290915	1.48295				3	6	16.9121	16.5058	16.8719	16.7276	0.431854	0.666462	0.0255352	0.0403773	15.3236	NaN	17.2016	16.183	16.6912	16.764	16.8717	NaN	NaN	NaN	16.5017	16.8719	NaN	17.3626		+				+
Q61214	Dyrk1a	Dual specificity tyrosine-phosphorylation-regulated kinase 1A	Dyrk1a	Dyrk1a	-0.8755	0	1	0	0.415464	1.61833	1.63561				1	4	16.0814	16.9569	16.0814	17.0046	NaN	0.300727	NaN	0.0177348	NaN	NaN	17.229	NaN	17.1744	16.5894	16.8348	NaN	NaN	NaN	NaN	NaN	NaN	16.0814
Q61400	Ceacam10	Carcinoembryonic antigen-related cell adhesion molecule 10	Ceacam10	Ceacam10	NaN	0	1	0	1.14196	2.67606	1.34738				0	5	NaN	20.9926	NaN	20.7539	NaN	0.467076	NaN	0.0222496	NaN	20.6217	20.6039	NaN	21.3722	20.7539	21.6114	NaN	NaN	NaN	NaN	NaN	NaN	NaN
Q61555	Fbn2	Fibrillin-2	Fbn2	Fbn2	0.44541	1.06831	0.145261	1.88956	0.0233461	0.111618	1.3528				6	7	20.9675	20.5221	21.0431	20.5263	0.504562	0.341996	0.024064	0.0166648	20.289	20.8445	20.4242	19.9334	20.7423	20.5263	20.8947	20.5739	21.5271	NaN	21.1167	20.2037	20.9696	21.4138
Q61578	Fdxr	NADPH:adrenodoxin oxidoreductase, mitochondrial	Fdxr	Fdxr	0.15571	0.324804	0.580404	0.742462	0.481184	1.10807	1.30028				6	7	20.0392	19.8835	20.0417	19.918	0.479538	0.262457	0.02393	0.0131998	19.8349	19.7971	19.918	20.0203	19.3715	20.0563	20.1861	20.027	20.0565	NaN	19.6543	20.5241	20.6032	19.3699
Q61666	Hira	Protein HIRA	Hira	Hira	-0.14812	0.47556	0.425211	-1.06755	1.99211	0.244912	1.51672				2	5	18.3326	18.4807	18.3326	18.5347	0.050912	0.183653	0.00277713	0.00993755	NaN	18.2898	18.7083	NaN	18.5762	18.5347	18.2946	NaN	NaN	NaN	18.3686	18.2966	NaN	NaN
Q61792	Lasp1	LIM and SH3 domain protein 1	Lasp1	Lasp1	0.115357	0.175649	0.781903	0.440585	0.905969	0.073895	1.56261				7	7	23.3244	23.209	23.5162	23.1941	0.661837	0.204565	0.0283753	0.00881402	23.3316	23.4954	23.1753	23.2542	22.8213	23.1913	23.1941	23.5662	23.5162	21.9137	23.3187	23.8099	23.8759	23.2701											+
Q62074	Prkci	Protein kinase C iota type	Prkci	Prkci	-1.42597	0	0.997255	0	0.873626	0.617093	1.6117				1	3	15.5074	16.9334	15.5074	16.9672	NaN	0.122797	NaN	0.00725179	NaN	NaN	16.7972	NaN	16.9672	17.0357	NaN	15.5074	NaN	NaN	NaN	NaN	NaN	NaN
Q62172	Ralbp1	RalA-binding protein 1	Ralbp1	Ralbp1	-2.75536	0	1	0	0.0860976	0.15412	1.56342				1	5	16.5753	19.3307	16.5753	19.414	NaN	1.13772	NaN	0.0588559	17.4521	NaN	19.3723	NaN	19.9811	19.414	20.4338	16.5753	NaN	NaN	NaN	NaN	NaN	NaN		+				+
Q62234	Myom1	Myomesin-1	Myom1	Myom1	-1.52672	1.29065	0.1148	-2.1873	0.448112	2.24124	1.61258				6	7	20.6115	22.1383	20.312	22.62	1.55618	0.93147	0.0755004	0.0420751	22.636	22.7084	23.2265	20.9838	22.62	22.0225	20.7706	20.3706	NaN	20.2534	20.1267	18.4447	21.3127	23.1611
Q62280	Ss18	Protein SSXT	Ss18	Ss18	0.368066	0.429932	0.466446	0.946517	0.321257	0.490034	1.38291				4	6	19.3116	18.9435	19.5406	18.8232	0.823605	0.416738	0.0426482	0.021999	NaN	18.719	18.4776	19.6685	18.8668	18.7796	19.1497	NaN	NaN	NaN	18.1985	19.1787	19.9667	19.9025
Q62433	Ndrg1	Protein NDRG1	Ndrg1	Ndrg1	-0.676114	0.976156	0.1702	-1.76288	0.0594782	0.764783	1.76546				6	7	19.5138	20.1899	19.7741	20.3819	0.906822	0.431255	0.0464708	0.0213599	20.4919	20.403	20.4333	19.251	20.2121	20.1562	20.3819	19.8761	20.6246	NaN	18.0528	19.6722	18.8936	19.9635
Q62481	Vps72	Vacuolar protein sorting-associated protein 72 homolog	Vps72	Vps72	0.00216643	0.00646547	1	0.0191927	0.876033	3.36725	2.18238				3	6	18.2758	18.2736	18.2218	18.2353	0.0952675	0.179013	0.00521277	0.00979622	NaN	18.1935	18.277	18.1014	18.3281	18.1448	18.597	NaN	NaN	NaN	18.2218	18.2198	NaN	18.3858
Q64010	Crk	Adapter molecule crk	Crk	Crk	0.639802	1.23106	0.12649	2.10839	0.117661	0.190278	2.69909				6	7	21.9839	21.3441	21.9688	21.2448	0.743348	0.291473	0.0338133	0.0136559	21.4039	21.2448	21.1303	21.9523	21.1144	21.3818	21.1813	21.6395	22.6621	NaN	21.1412	21.2578	22.9049	22.298
Q640Q5	Pan3	PAN2-PAN3 deadenylation complex subunit Pan3	Pan3	Pan3	-1.03177	0	1	0	0.94073	0.357707	2.48089				1	3	16.5058	17.5376	16.5058	17.526	NaN	0.235063	NaN	0.0134034	NaN	NaN	17.7782	NaN	17.526	17.3085	NaN	NaN	NaN	NaN	16.5058	NaN	NaN	NaN
Q64152	Btf3	Transcription factor BTF3	Btf3	Btf3	-0.248271	0.379548	0.51813	-0.84005	0.563327	0.267353	1.38253				7	7	20.683	20.9313	20.6611	20.8965	0.740197	0.252055	0.0357877	0.012042	20.7255	21.1581	21.1898	21.189	20.8965	20.7956	20.5645	20.4744	20.6611	21.3798	19.6641	19.9571	20.8891	21.7555
Q64356	Svs6	Seminal vesicle secretory protein 6	Svs6	Svs6	0.411541	0	1	0	0.287936	3.64054	1.5942				1	5	19.7467	19.3352	19.7467	19.3341	NaN	0.334628	NaN	0.0173067	19.7304	18.852	19.3341	NaN	19.2149	NaN	19.5444	NaN	NaN	19.7467	NaN	NaN	NaN	NaN
Q64442	Sord	Sorbitol dehydrogenase	Sord	Sord	0.537621	0.701649	0.273329	1.36746	0.165369	2.23752	1.74718				6	7	21.2881	20.7505	21.1595	20.6268	0.857878	0.549752	0.0402984	0.0264934	21.0964	21.0415	20.5698	20.1528	20.1188	21.6476	20.6268	21.3146	21.0045	NaN	20.6082	22.0573	22.497	20.2473
Q64669	Nqo1	NAD(P)H dehydrogenase [quinone] 1	Nqo1	Nqo1	0.161976	0.160841	0.801743	0.408856	0.735594	0.660542	1.33349				6	7	20.4305	20.2686	20.6688	20.4817	0.946728	0.427451	0.0463389	0.0210893	20.587	19.7594	20.513	20.4817	19.8124	20.8129	19.9135	20.9497	20.388	NaN	18.6556	21.3127	20.9508	20.3264
Q68FD5	Cltc	Clathrin heavy chain 1	Cltc	Cltc	-0.261343	1.07689	0.144	-1.88567	0.009911	0.0609396	2.19458				7	7	24.0989	24.3602	24.2546	24.3409	0.313726	0.18983	0.0130183	0.00779261	24.3411	24.4937	24.7117	24.1445	24.2671	24.3409	24.2227	24.3049	24.2546	23.4816	24.2687	24.3331	24.1798	23.8696
Q68FH0	Pkp4	Plakophilin-4	Pkp4	Pkp4	-0.783896	1.24751	0.121584	-2.18666	0.371441	0.334572	1.69095				4	7	17.5187	18.3026	17.8094	18.2875	0.761904	0.447711	0.043491	0.0244617	18.8903	18.2795	18.7529	17.7173	18.4308	18.2875	17.7597	17.8046	NaN	NaN	18.0657	17.8141	NaN	16.3903
Q6IR34	Gpsm1	G-protein-signaling modulator 1	Gpsm1	Gpsm1	-0.998559	0	0.980909	0	2.56986	2.5763	1.85326				1	5	17.3278	18.3264	17.3278	18.3329	NaN	0.168731	NaN	0.009207	NaN	18.1877	18.3329	NaN	18.5053	18.1276	18.4783	NaN	NaN	NaN	NaN	17.3278	NaN	NaN
Q6IRU5	Cltb	Clathrin light chain B	Cltb	Cltb	0.513543	1.13217	0.13347	1.95899	0.253209	0.231317	1.5624				7	7	23.0432	22.5296	23.1399	22.3961	0.585423	0.371922	0.0254055	0.0165081	22.3718	22.4743	22.3961	23.3254	22.2079	22.6061	22.3258	22.6605	23.4484	22.4354	22.3144	23.1399	23.8697	23.4339
Q6NZB0	Dnajc8	DnaJ homolog subfamily C member 8	Dnajc8	Dnajc8	-0.147231	0.345171	0.554435	-0.780301	0.653404	0.115481	1.33751				6	7	19.868	20.0152	19.8811	19.9686	0.446062	0.21228	0.0224513	0.0106059	19.7774	19.8562	19.912	20.2768	20.3403	19.9686	19.9752	19.983	19.3025	NaN	19.7903	19.9719	19.5533	20.6069
Q6P069	Sri	Sorcin	Sri	Sri	0.172729	0.381131	0.517333	0.84287	0.351797	1.07688	1.39742				7	7	23.7612	23.5884	23.8421	23.7404	0.428879	0.331717	0.0180496	0.0140627	23.952	23.5838	23.7404	23.7983	23.0978	23.7846	23.1622	23.8421	24.1226	22.9853	23.474	23.9712	24.2436	23.6894
Q6P1E1	Zmiz1	Zinc finger MIZ domain-containing protein 1	Zmiz1	Zmiz1	NaN	0	0.982807	0	1.59992	1.59992	1.59992				0	6	NaN	17.0671	NaN	17.1053	NaN	0.374577	NaN	0.0219473	17.4663	17.1536	17.4473	NaN	16.5303	16.7479	17.057	NaN	NaN	NaN	NaN	NaN	NaN	NaN
Q6P1G0	Heatr6	HEAT repeat-containing protein 6	Heatr6	Heatr6	-1.04377	0.896455	0.187841	-1.82904	0.174863	0.433817	1.46982				3	4	17.1469	18.1907	16.9348	17.9356	0.686866	0.784818	0.0400578	0.0431439	NaN	NaN	19.3301	NaN	17.8274	18.0438	17.5614	NaN	NaN	NaN	16.9348	17.9148	NaN	16.5911
Q6PD26	Pigs	GPI transamidase component PIG-S	Pigs	Pigs	-0.3238	0.97786	0.17032	-1.78115	0.290191	0.605018	1.43316				5	7	19.6183	19.9421	19.5965	19.9205	0.436915	0.182728	0.0222708	0.00916292	20.2412	19.7601	20.0812	19.7541	20.0225	19.8151	19.9205	20.0782	NaN	19.5965	19.3932	20.0008	NaN	19.0228
Q6PDL0	Dync1li2	Cytoplasmic dynein 1 light intermediate chain 2	Dync1li2	Dync1li2	-0.824899	1.14856	0.132581	-1.98059	0.520704	0.68127	1.42548				7	7	19.4063	20.2312	19.1453	20.2724	1.04794	0.340707	0.0539998	0.0168406	20.8347	19.97	20.3492	19.8919	20.2724	20.3954	19.9051	20.5459	19.1453	18.8333	17.6954	20.6716	19.0546	19.8983
Q6PGB6	Naa50	N-alpha-acetyltransferase 50	Naa50	Naa50	-0.799381	1.21128	0.12346	-2.08207	0.487265	1.44085	1.38885				6	7	19.3995	20.1989	19.312	20.2837	0.997799	0.20841	0.0514342	0.0103179	19.7552	20.3392	20.2523	20.2837	20.1256	20.3275	20.3089	19.7136	18.0119	NaN	18.9105	20.5276	18.7959	20.4377		+					+
Q6PGF3	Med16	Mediator of RNA polymerase II transcription subunit 16	Med16	Med16	-1.8835	0	0.98982	0	2.89918	1.47403	3.61499				1	4	15.8608	17.7443	15.8608	17.7713	NaN	0.0883157	NaN	0.00497713	NaN	17.7438	17.7989	NaN	17.6199	17.8146	NaN	NaN	NaN	NaN	15.8608	NaN	NaN	NaN
Q6PNC0	Dmxl1	DmX-like protein 1	Dmxl1	Dmxl1	-0.552409	0.554487	0.36078	-1.21404	0.135005	0.0247668	1.3584				3	4	18.0284	18.5808	18.1119	18.5147	0.890843	0.249952	0.0494134	0.0134522	18.3845	NaN	18.9092	NaN	18.6418	18.3876	NaN	18.8745	NaN	NaN	17.0987	18.1119	NaN	NaN
Q6QI06	Rictor	Rapamycin-insensitive companion of mTOR	Rictor	Rictor	-0.443134	0	0.991573	0	0.695944	2.57648	3.69784				1	3	16.5077	16.9508	16.5077	16.9855	NaN	0.0884514	NaN	0.00521812	NaN	NaN	17.0167	NaN	16.8503	16.9855	NaN	16.5077	NaN	NaN	NaN	NaN	NaN	NaN
Q6X893	Slc44a1	Choline transporter-like protein 1	Slc44a1	Slc44a1	0.607242	0.941774	0.178914	1.77194	0.924148	4.5579	1.50393				4	6	19.0999	18.4926	19.0935	18.4316	0.400244	0.595702	0.0209553	0.0322129	18.6392	18.2239	19.4133	NaN	17.7438	18.8359	18.0997	19.07	NaN	NaN	19.117	19.5958	18.6167	NaN
Q6ZQ03	Fnbp4	Formin-binding protein 4	Fnbp4	Fnbp4	-0.86113	1.2188	0.125529	-2.23612	0.489597	1.35013	1.53717				4	5	16.1531	17.0143	16.1142	17.0079	0.590119	0.561739	0.0365328	0.0330157	16.8757	NaN	17.705	NaN	17.2968	17.0079	16.186	16.8561	NaN	NaN	15.8343	15.528	NaN	16.3942
Q6ZQK5	Acap2	Arf-GAP with coiled-coil, ANK repeat and PH domain-containing protein 2	Acap2	Acap2	-0.598585	0.891551	0.189159	-1.65773	0.0103092	2.09731	1.34443				5	7	19.3191	19.9177	19.3188	19.915	0.770836	0.487533	0.0399002	0.0244774	20.0176	19.6174	20.3783	19.0842	20.5615	19.8498	19.915	19.2393	20.405	NaN	18.2308	19.3188	NaN	19.4016
Q76MZ3	Ppp2r1a	Serine/threonine-protein phosphatase 2A 65 kDa regulatory subunit A alpha isoform	Ppp2r1a	Ppp2r1a	-0.0354143	0.0683047	0.965143	-0.187415	2.64627	2.80029	2.61695				7	7	22.7148	22.7502	22.737	22.8001	0.404489	0.293829	0.0178073	0.0129155	22.1862	22.802	22.6494	22.9375	22.7393	23.1367	22.8001	22.3231	22.737	23.3458	22.2066	22.938	22.9726	22.4802
Q7SIG6	Asap2	Arf-GAP with SH3 domain, ANK repeat and PH domain-containing protein 2	Asap2	Asap2	0.963829	1.16172	0.130651	1.99789	0.0255533	0.0687467	2.39114				7	7	27.769	26.8051	27.6289	27.0356	1.16983	0.51052	0.0421271	0.0190456	27.0356	27.0828	26.1879	27.4914	26.1523	27.1192	26.5668	27.6289	27.9186	26.9799	26.722	27.0637	30.207	27.8627		+					+
Q7TMQ7	Wdr91	WD repeat-containing protein 91	Wdr91	Wdr91	2.6684	0	0.986054	0	0.0429593	0.319058	1.35878				1	3	18.4563	15.7879	18.4563	16.1338	NaN	1.0733	NaN	0.0679825	NaN	NaN	16.1338	NaN	16.6456	NaN	14.5843	18.4563	NaN	NaN	NaN	NaN	NaN	NaN
Q7TN05	Ap1s3	AP-1 complex subunit sigma-3	Ap1s3	Ap1s3	1.39058	1.14845	0.131889	2.2855	0.859633	1.71989	1.82478				2	5	18.6142	17.2236	18.6142	17.5515	0.462024	0.779549	0.024821	0.0452604	NaN	16.2912	17.5828	NaN	16.5417	18.1509	17.5515	18.2875	NaN	NaN	NaN	18.9409	NaN	NaN		+					+
Q7TNT2	Far2	Fatty acyl-CoA reductase 2	Far2	Far2	-2.47832	0	0.984166	0	0.63052	1.10159	2.28695				1	6	17.7311	20.2094	17.7311	20.2	NaN	0.76269	NaN	0.0377393	20.4609	20.4944	19.9392	19.3848	21.4517	19.5255	NaN	17.7311	NaN	NaN	NaN	NaN	NaN	NaN
Q7TSI3	Ppp6r1	Serine/threonine-protein phosphatase 6 regulatory subunit 1	Ppp6r1	Ppp6r1	0.266131	0.449297	0.448985	0.964776	0.327016	2.13374	1.6476				6	7	20.2938	20.0277	20.1547	19.9877	0.463042	0.521561	0.0228169	0.026042	19.5871	19.9877	19.38	20.9053	19.7397	20.2002	20.3938	20.1627	19.9369	NaN	19.8292	20.6373	20.1467	21.0501
Q7TSQ8	Pdpr	Pyruvate dehydrogenase phosphatase regulatory subunit, mitochondrial	Pdpr	Pdpr	-0.659614	1.26262	0.11834	-2.15025	0.251196	1.34572	1.48456				6	7	19.0986	19.7582	19.0825	19.893	0.655307	0.44668	0.0343118	0.0226073	20.0824	20.0389	20.2433	18.9398	19.893	19.616	19.4941	19.521	18.2758	18.7954	20.0335	19.3696	NaN	18.5963
Q7TSS2	Ube2q1	Ubiquitin-conjugating enzyme E2 Q1	Ube2q1	Ube2q1	NaN	0	1	0	2.40067	2.51885	1.32162				0	4	NaN	17.9442	NaN	17.9595	NaN	0.0858922	NaN	0.00478664	18.0316	NaN	NaN	NaN	17.826	17.9647	17.9543	NaN	NaN	NaN	NaN	NaN	NaN	NaN
Q80UX8	Abhd13	Protein ABHD13	Abhd13	Abhd13	0.638158	0.973625	0.169333	1.96751	1.49823	1.94553	1.72885				3	4	17.257	16.6189	17.1344	16.6481	0.341389	0.472098	0.0197826	0.0284074	16.0425	16.8304	17.1368	NaN	NaN	NaN	16.4658	16.9939	NaN	NaN	17.1344	17.6428	NaN	NaN
Q80V86	Ints8	Integrator complex subunit 8	Ints8	Ints8	0.342259	0.308449	0.598335	0.741853	0.670723	0.436416	1.53796				2	5	16.7111	16.3688	16.7111	16.3854	0.785312	0.475302	0.0469935	0.029037	16.3854	NaN	16.7064	NaN	16.9498	15.9871	15.8155	17.2664	NaN	NaN	16.1558	NaN	NaN	NaN
Q80X41	Vrk1	Serine/threonine-protein kinase VRK1	Vrk1	Vrk1	-0.138818	0.351104	0.546862	-0.797756	2.45027	3.37388	1.54302				4	7	19.0884	19.2272	19.0718	19.1842	0.226983	0.299755	0.0118911	0.0155901	19.8015	18.9488	19.1865	19.1731	19.3859	18.9107	19.1842	19.3722	NaN	NaN	18.9988	18.8378	NaN	19.1449
Q80ZM7	Gtf2a2	Transcription initiation factor IIA subunit 2	Gtf2a2	Gtf2a2	0.208251	0.337411	0.564791	0.776451	0.476475	1.64971	1.31231				4	6	19.1597	18.9514	19.044	18.964	0.619334	0.214681	0.0323249	0.011328	NaN	18.5997	19.0772	19.2375	18.866	18.991	18.937	NaN	18.7239	NaN	19.364	18.6074	NaN	19.9433
Q8BFY6	Pef1	Peflin	Pef1	Pef1	-0.00628744	0.00703273	1	-0.0205958	2.24204	0.710387	2.28466				6	7	21.3931	21.3994	21.2663	21.3552	0.747279	0.294354	0.0349309	0.0137552	21.2284	21.3604	21.0348	21.9847	21.3552	21.3416	21.4905	20.8901	21.6424	NaN	20.586	22.2782	22.1974	20.7644
Q8BGT7	Smndc1	Survival of motor neuron-related-splicing factor 30	Smndc1	Smndc1	0.488175	1.09108	0.140545	1.99549	0.759837	2.16035	1.46247				4	6	19.7221	19.2339	19.6491	19.1901	0.589942	0.144913	0.0299127	0.00753424	NaN	19.174	19.0672	19.369	19.2062	19.1396	19.4477	20.0454	NaN	NaN	20.3904	19.2529	NaN	19.1998
Q8BH86	Dglucy	D-glutamate cyclase, mitochondrial	Dglucy	Dglucy	-0.195746	0.319083	0.585978	-0.73428	0.922263	4.94905	1.3714				5	7	20.139	20.3348	20.0825	20.1917	0.510149	0.414678	0.0253314	0.0203926	20.5722	20.5369	21.0462	19.7849	20.1917	20.1246	20.087	19.9437	19.5714	20.9621	NaN	20.0825	NaN	20.1355
Q8BHL3	Tbc1d10b	TBC1 domain family member 10B	Tbc1d10b	Tbc1d10b	0.6348	1.13198	0.132774	1.95874	0.192041	1.2941	1.76534				7	7	20.4654	19.8306	20.412	19.8464	0.760237	0.39656	0.0371473	0.0199974	19.0787	19.8403	19.8464	20.2977	20.0158	19.6202	20.1154	19.4847	20.6314	21.8715	20.1379	19.9307	20.412	20.7899
Q8BHN3	Ganab	Neutral alpha-glucosidase AB	Ganab	Ganab	-0.0900427	0.472797	0.426473	-1.00082	0.961487	0.00540417	1.86006				7	7	23.2015	23.2915	23.2183	23.2403	0.205815	0.119587	0.00887078	0.00513437	23.2403	23.3615	23.5216	23.3046	23.2307	23.1658	23.2162	23.144	23.3801	22.8038	23.3807	23.3539	23.1296	23.2183
Q8BJF9	Chmp2b	Charged multivesicular body protein 2b	Chmp2b	Chmp2b	0.341198	0.432955	0.464663	0.936715	1.01525	0.786891	1.9746				6	7	20.4149	20.0737	20.4507	20.0522	0.857579	0.415923	0.0420075	0.0207198	20.1204	20.0522	19.5086	20.6368	19.6531	20.5398	20.0049	20.5702	20.3311	NaN	19.1909	20.9452	21.6406	19.8113
Q8BJM7	Tyw1	S-adenosyl-L-methionine-dependent tRNA 4-demethylwyosine synthase	Tyw1	Tyw1	-1.53282	0	1	0	0.253189	0.902173	1.69926				1	4	15.7159	17.2487	15.7159	17.2008	NaN	0.22402	NaN	0.0129876	NaN	NaN	17.5579	NaN	17.1517	17.0353	17.25	NaN	NaN	NaN	NaN	15.7159	NaN	NaN
Q8BK30	Ndufv3	NADH dehydrogenase [ubiquinone] flavoprotein 3, mitochondrial	Ndufv3	Ndufv3	0.675607	1.11471	0.134549	1.95251	0.0229525	0.734924	1.37581				6	7	21.6434	20.9678	21.6298	21.0479	0.629642	0.61546	0.0290916	0.0293526	19.7801	21.2621	21.0003	21.362	20.6427	21.6798	21.0479	21.1852	21.7407	NaN	20.8019	22.0255	22.5885	21.5189
Q8BML1	Mical2	[F-actin]-monooxygenase MICAL2	Mical2	Mical2	0.376701	0	1	0	0.0289445	0.438894	1.56112				1	5	17.7607	17.384	17.7607	17.382	NaN	0.201507	NaN	0.0115915	NaN	17.382	17.0775	NaN	17.3305	17.5717	17.5583	NaN	NaN	NaN	NaN	17.7607	NaN	NaN
Q8BP40	Acp6	Lysophosphatidic acid phosphatase type 6	Acp6	Acp6	0.97949	1.27747	0.114124	2.16988	0.710585	0.740521	1.73188				6	7	20.5203	19.5408	20.4974	19.458	1.05568	0.527435	0.0514457	0.0269914	20.3807	19.458	19.1753	20.003	18.8726	19.7183	19.178	21.1121	18.991	20.6146	19.9232	20.3802	22.1009	NaN
Q8BP48	Metap1	Methionine aminopeptidase 1	Metap1	Metap1	-0.412229	0.899644	0.188177	-1.6694	0.480668	1.93109	1.9173				5	7	18.8349	19.2471	18.7267	19.2211	0.487363	0.371565	0.0258755	0.019305	18.9685	19.6464	19.7198	19.2211	19.4699	18.7997	18.9045	18.5797	18.7267	NaN	19.0879	19.5238	NaN	18.2564
Q8BT14	Cnot4	CCR4-NOT transcription complex subunit 4	Cnot4	Cnot4	-0.921967	1.26241	0.117595	-2.38159	0.130896	0.128467	1.48203				2	6	17.5628	18.4848	17.5628	18.4585	0.889188	0.334103	0.0506289	0.0180745	18.8469	18.8069	18.4155	NaN	17.9226	18.4809	18.4361	NaN	NaN	NaN	18.1916	16.9341	NaN	NaN
Q8BTI8	Srrm2	Serine/arginine repetitive matrix protein 2	Srrm2	Srrm2	0.173414	0.560043	0.359188	1.14284	0.322288	3.59893	1.61042				7	7	21.9581	21.7847	22.0055	21.8263	0.33211	0.225563	0.0151247	0.0103542	21.344	21.8329	21.857	22.1025	21.8263	21.7645	21.7655	21.3711	22.3261	22.1775	21.712	21.8972	22.2172	22.0055
Q8BU88	Mrpl22	39S ribosomal protein L22, mitochondrial	Mrpl22	Mrpl22	0.0368432	0.036158	1	0.10242	1.35331	0.0845351	1.36419				7	7	19.7154	19.6785	20.0042	19.6353	0.830469	0.464909	0.0421229	0.0236252	19.8768	19.4592	20.5708	19.4551	19.6353	19.6751	19.0773	19.8032	20.4202	20.3332	20.1914	20.0042	18.0912	19.1641
Q8BVG4	Dpp9	Dipeptidyl peptidase 9	Dpp9	Dpp9	-0.934733	0.730439	0.256808	-1.4931	0.0512538	0.172766	1.75293				2	6	17.1486	18.0833	17.1486	18.3633	0.901986	0.736708	0.0525982	0.0407396	18.5224	18.5156	18.886	NaN	17.341	17.0239	18.2111	16.5108	NaN	NaN	17.7864	NaN	NaN	NaN
Q8BWW4	Larp4	La-related protein 4	Larp4	Larp4	-0.327209	1.19915	0.124452	-2.06589	0.807575	0.134716	2.60593				6	7	19.6587	19.9859	19.6405	19.9891	0.395685	0.134596	0.0201277	0.00673451	20.0689	19.8015	19.8462	19.9259	20.1454	20.1246	19.9891	19.9815	19.0937	NaN	19.5846	20.1941	19.6964	19.4021
Q8BYI6	Lpcat2	Lysophosphatidylcholine acyltransferase 2	Lpcat2	Lpcat2	0.114806	0.157579	0.806905	0.402622	1.80814	4.95575	1.94493				5	7	20.0776	19.9628	20.1109	19.9543	0.743765	0.162656	0.0370445	0.00814793	20.0278	19.8473	19.7329	20.1092	20.2024	19.8658	19.9543	21.0923	NaN	NaN	20.1109	20.0317	18.9944	20.1588	+			+
Q8BYK4	Rdh12	Retinol dehydrogenase 12	Rdh12	Rdh12	-0.571017	1.15341	0.133136	-2.13412	0.372605	2.29717	1.3021				3	6	18.1295	18.7005	18.1717	18.7633	0.517392	0.305578	0.0285387	0.0163406	18.9428	18.3333	18.9507	NaN	18.5837	19.0102	18.3824	18.6245	NaN	NaN	NaN	18.1717	NaN	17.5923
Q8BZ33	Tns4	Tensin-4	Tns4	Tns4	1.00065	0.703986	0.272564	1.44828	1.69742	2.82555	1.31433				2	6	18.4042	17.4035	18.4042	17.6336	0.259438	0.919682	0.0140967	0.0528447	16.6623	17.8734	18.2081	NaN	17.3939	18.298	15.9853	NaN	NaN	NaN	18.2207	18.5876	NaN	NaN
Q8C156	Ncaph	Condensin complex subunit 2	Ncaph	Ncaph	-0.485934	0.71642	0.26454	-1.46937	0.227226	1.15012	1.36076				3	5	17.6157	18.1016	17.7312	18.2286	0.642637	0.317975	0.036481	0.0175661	NaN	NaN	18.4398	17.8633	18.2975	17.6788	18.2286	NaN	NaN	NaN	16.9231	18.1927	NaN	17.7312
Q8C5H8	Nadk2	NAD kinase 2, mitochondrial	Nadk2	Nadk2	-0.0864918	0.115156	0.879694	-0.30437	1.55203	2.49395	1.61125				5	7	18.7647	18.8512	18.8025	18.8693	0.574155	0.415654	0.0305976	0.0220492	18.8693	18.4023	19.6574	18.9506	18.5626	18.9507	18.5653	18.8025	18.7027	19.546	NaN	18.8423	NaN	17.9299
Q8C5K5	-	Uncharacterized protein CXorf38 homolog	-	-	-1.7608	0	1	0	0.820647	0.0945697	1.3493				2	1	17.7325	19.4933	17.7325	19.4933	0.690137	NaN	0.0389194	NaN	NaN	NaN	19.4933	NaN	NaN	NaN	NaN	NaN	NaN	17.2445	NaN	NaN	NaN	18.2205
Q8C6B0	Mettl7a1	MCG20149, isoform CRA_a	Mettl7a1	Mettl7a1	0.385621	0.934313	0.178075	1.70453	0.282336	1.54783	1.71391				6	7	21.2746	20.8889	21.305	20.9666	0.420444	0.394769	0.0197628	0.0188985	21.4704	20.9666	21.0617	20.9072	20.3043	21.0592	20.4531	21.349	20.9567	NaN	21.261	21.8395	21.5736	20.6675		+					+
Q8C7X2	Emc1	ER membrane protein complex subunit 1	Emc1	Emc1	-0.471328	1.12583	0.13461	-1.95063	0.431625	0.613882	1.41248				7	7	19.8791	20.3504	19.8424	20.3182	0.620979	0.151914	0.0312379	0.00746492	20.3584	20.3182	20.593	20.1524	20.5045	20.2757	20.2505	19.7934	18.9798	20.8905	20.1117	20.2119	19.3237	19.8424
Q8CCS6	Pabpn1	Polyadenylate-binding protein 2	Pabpn1	Pabpn1	0.681329	1.01365	0.161038	1.8317	0.34656	1.40077	1.4391				5	7	21.1059	20.4246	21.1304	20.354	0.577455	0.67102	0.0273599	0.0328536	20.5887	20.354	19.9096	21.7629	20.5416	19.7271	20.0881	21.1304	NaN	NaN	20.48	20.6588	21.3204	21.9399
Q8CDJ3	Atg14	Beclin 1-associated autophagy-related key regulator	Atg14	Atg14	-0.827533	0.919142	0.18237	-1.69744	0.263602	2.40184	1.38365				6	6	20.8253	21.6528	20.9928	21.7221	1.02325	0.615639	0.049135	0.0284323	NaN	21.9445	22.2512	20.7926	22.2979	21.1309	21.4998	21.3137	19.6278	22.3046	19.72	21.2125	20.7731	NaN
Q8CG14	C1sa	Complement C1s-A subcomponent	C1sa	C1sa	-0.0672007	0.0372679	1	-0.107032	1.97385	0.166461	3.45245				3	6	18.792	18.8592	18.5248	18.9328	1.10877	0.782309	0.0590023	0.0414815	NaN	18.7933	19.0724	18.1937	19.4901	17.763	19.8429	NaN	17.8413	NaN	18.5248	NaN	NaN	20.01
Q8CH18	Ccar1	Cell division cycle and apoptosis regulator protein 1	Ccar1	Ccar1	0.184729	0.661036	0.297785	1.29928	1.16837	2.80479	2.55127				7	7	21.4233	21.2385	21.5112	21.3102	0.271187	0.260689	0.0126585	0.0122743	20.695	21.1671	21.3258	21.4455	21.3102	21.2615	21.4646	21.0918	21.6192	21.668	21.4783	21.5112	21.6058	20.9885
Q8CIF6	Sidt2	SID1 transmembrane family member 2	Sidt2	Sidt2	0.0372839	0.0398958	1	0.114957	1.46466	2.83119	1.33673				2	6	18.2586	18.2213	18.2586	18.1917	0.461387	0.383098	0.0252697	0.0210248	18.0144	18.4649	18.1767	NaN	18.7934	17.6716	18.2066	17.9323	NaN	NaN	NaN	NaN	NaN	18.5848
Q8JZR0	Acsl5	Long-chain-fatty-acid--CoA ligase 5	Acsl5	Acsl5	-0.553112	0.958273	0.174708	-1.73801	0.132898	0.173633	1.59105				6	7	20.0193	20.5724	20.0372	20.597	0.753383	0.356231	0.0376328	0.0173159	21.1473	20.6064	20.597	20.5321	20.8085	20.2763	20.0394	20.7375	19.775	NaN	20.7928	20.1298	18.7362	19.9446
Q8K1N4	Spats2	Spermatogenesis-associated serine-rich protein 2	Spats2	Spats2	0.168317	0.420089	0.474046	1.02669	1.36128	2.2459	2.06446				2	3	15.7109	15.5426	15.7109	15.6036	0.253922	0.127041	0.0161621	0.00817373	NaN	NaN	NaN	NaN	15.3966	15.6277	15.6036	15.5314	NaN	NaN	NaN	15.8905	NaN	NaN
Q8K224	Nat10	RNA cytidine acetyltransferase	Nat10	Nat10	-0.475045	0.800179	0.226559	-1.52426	0.0495518	0.317742	1.30624				5	7	18.4466	18.9217	18.6193	18.8405	0.790987	0.23463	0.0428797	0.0124001	18.6989	18.8405	18.9994	19.0935	19.3319	18.8028	18.6848	19.0609	NaN	NaN	18.3944	19.034	17.1246	18.6193
Q8K297	Colgalt1	Procollagen galactosyltransferase 1	Colgalt1	Colgalt1	0.0309429	0.0294079	1	0.0838896	1.36253	2.11684	1.39391				7	7	20.9017	20.8708	20.9973	20.7727	0.860189	0.460915	0.041154	0.0220842	20.7727	20.6103	21.3617	20.2062	21.28	20.5203	21.3443	20.8602	21.1793	22.2444	20.9973	20.3009	19.4673	21.2627
Q8K2D3	Edc3	Enhancer of mRNA-decapping protein 3	Edc3	Edc3	-0.399109	1.11801	0.134375	-1.97736	0.0109643	0.274437	1.93922				5	7	18.5504	18.9495	18.7196	18.8528	0.506702	0.163928	0.0273148	0.00865079	18.8207	18.8305	19.1878	18.8091	19.1571	18.9887	18.8528	18.7196	NaN	NaN	18.9837	18.8303	17.6951	18.5234
Q8K2J0	Plcd3	1-phosphatidylinositol 4,5-bisphosphate phosphodiesterase delta-3	Plcd3	Plcd3	NaN	0	1	0	1.815	1.98892	1.52057				0	5	NaN	17.2716	NaN	17.3105	NaN	0.358428	NaN	0.0207525	NaN	17.5029	16.6953	NaN	17.2246	17.6245	17.3105	NaN	NaN	NaN	NaN	NaN	NaN	NaN
Q8K2W3	Txndc11	Thioredoxin domain-containing protein 11	Txndc11	Txndc11	0.207175	0	1	0	3.27895	2.59015	2.8926				1	4	17.8421	17.6349	17.8421	17.6031	NaN	0.109366	NaN	0.00620167	NaN	17.7927	NaN	NaN	17.6107	17.5954	17.5409	NaN	NaN	NaN	NaN	17.8421	NaN	NaN
Q8K3C3	Lzic	Protein LZIC	Lzic	Lzic	0.753796	0.937156	0.178458	1.74155	0.0263749	0.396261	1.6571				4	7	19.5358	18.782	19.743	18.8239	0.740212	0.664343	0.03789	0.0353712	18.8239	19.1214	19.6299	17.6444	18.79	19.2388	18.2258	20.1293	NaN	NaN	NaN	18.528	20.0512	19.4348
Q8K4Q8	Colec12	Collectin-12	Colec12	Colec12	-0.114275	0.0830005	0.936633	-0.234603	1.44381	2.10354	1.37289				2	4	19.8365	19.9508	19.8365	19.9184	0.399374	0.607158	0.0201333	0.0304328	NaN	19.8211	NaN	NaN	20.0156	19.2474	20.719	NaN	NaN	NaN	19.5541	NaN	NaN	20.1189
Q8N7N5	Dcaf8	DDB1- and CUL4-associated factor 8	Dcaf8	Dcaf8	-0.8652	1.27877	0.11475	-2.40923	0.0888718	0.534642	1.51077				3	5	17.6307	18.4959	17.5021	18.4465	0.613592	0.417698	0.0348025	0.0225833	18.5246	18.0006	19.1515	NaN	18.4465	NaN	18.3563	18.2984	NaN	NaN	NaN	17.5021	NaN	17.0916
Q8QZV7	IntS13	Integrator complex subunit 13	IntS13	IntS13	0.347784	0.615008	0.323571	1.27601	0.647906	1.98556	1.56933				3	6	18.4226	18.0748	18.5835	17.9846	0.634691	0.216491	0.0344518	0.0119775	NaN	18.0019	18.2309	17.894	17.9674	17.9132	18.4413	NaN	NaN	NaN	18.9613	18.5835	NaN	17.7229
Q8R0F8	Fahd1	Acylpyruvase FAHD1, mitochondrial	Fahd1	Fahd1	-0.9192	1.14349	0.132376	-2.43151	0.12224	4.45095	1.39949				2	4	17.4109	18.3301	17.4109	18.5303	0.0599632	0.502859	0.003444	0.0274335	18.4363	NaN	18.6687	NaN	17.5911	18.6243	NaN	17.4533	NaN	NaN	NaN	17.3685	NaN	NaN
Q8R238	Sdsl	Serine dehydratase-like	Sdsl	Sdsl	0.6398	0	1	0	1.84227	2.72064	1.34691				1	6	18.8895	18.2497	18.8895	18.2332	NaN	0.460287	NaN	0.0252216	NaN	18.4719	18.96	18.1863	17.581	18.2802	18.0188	NaN	NaN	NaN	NaN	18.8895	NaN	NaN
Q8R2S9	Actr8	Actin-related protein 8	Actr8	Actr8	-0.97673	1.20463	0.124582	-2.38949	0.246974	0.698023	1.34782				2	5	16.9187	17.8954	16.9187	17.7395	0.90941	0.302671	0.0537519	0.0169134	NaN	17.7395	17.5863	NaN	18.2956	18.1331	17.7224	NaN	NaN	NaN	NaN	17.5617	NaN	16.2756
Q8R2U6	Nudt4	Diphosphoinositol polyphosphate phosphohydrolase 2	Nudt4	Nudt4	0.754881	1.12299	0.134519	1.9637	0.746535	1.23761	1.34735				6	7	20.0718	19.3169	20.1276	19.4275	0.884332	0.472853	0.0440585	0.0244787	18.8635	19.5273	18.6768	20.0038	19.048	19.6713	19.4275	21.2656	19.5715	NaN	18.6968	20.0459	20.6415	20.2093
Q8R2Z5	Vwa1	von Willebrand factor A domain-containing protein 1	Vwa1	Vwa1	-0.122645	0.153299	0.813253	-0.391941	2.14554	2.56338	1.58718				6	7	19.9981	20.1207	20.0012	20.1189	0.765829	0.302038	0.0382951	0.0150113	20.2267	19.7605	19.8652	19.969	20.231	20.1189	20.6738	20.1587	19.5435	NaN	19.8436	18.8643	20.5256	21.0528
Q8R3F9	Tut1	Speckle targeted PIP5K1A-regulated poly(A) polymerase	Tut1	Tut1	-0.198527	0.240932	0.687382	-0.594004	1.13441	0.158142	1.62754				3	5	18.2845	18.4831	18.2442	18.3635	0.574961	0.385836	0.0314452	0.0208751	NaN	NaN	18.1792	19.1524	18.3635	18.2873	18.4329	NaN	NaN	NaN	17.7308	18.2442	NaN	18.8786
Q8R3L2	Tcf25	Transcription factor 25	Tcf25	Tcf25	0.0291581	0.0446537	1	0.129127	1.50793	2.73097	1.4535				3	4	16.5659	16.5368	16.4641	16.5553	0.332943	0.267926	0.0200981	0.0162018	NaN	16.7814	16.3609	NaN	16.7496	NaN	16.2552	NaN	NaN	NaN	16.9379	16.2958	NaN	16.4641
Q8R5F3	Oard1	O-acetyl-ADP-ribose deacetylase 1	Oard1	Oard1	1.8634	0	1	0	1.46641	0.2381	1.62657				1	3	18.8933	17.0299	18.8933	16.9565	NaN	0.162176	NaN	0.00952304	NaN	16.9174	NaN	NaN	NaN	17.2158	16.9565	18.8933	NaN	NaN	NaN	NaN	NaN	NaN
Q8R5L3	Vps39	Vam6/Vps39-like protein	Vps39	Vps39	-2.3598	0	1	0	0.641725	0.0899935	1.34687				1	4	15.6621	18.0219	15.6621	18.1704	NaN	0.599904	NaN	0.0332875	NaN	17.1885	18.5583	NaN	18.3336	NaN	18.0072	NaN	NaN	NaN	NaN	15.6621	NaN	NaN
Q8VC88	Gca	Grancalcin	Gca	Gca	2.1823	0	1	0	0.072647	0.0587419	1.32615				1	3	18.5989	16.4166	18.5989	16.6637	NaN	0.600102	NaN	0.0365546	16.6637	NaN	16.8537	NaN	15.7324	NaN	NaN	18.5989	NaN	NaN	NaN	NaN	NaN	NaN	+			+
Q8VD31	Tapbpl	Tapasin-related protein	Tapbpl	Tapbpl	-0.18623	0.143911	0.828379	-0.372778	0.528989	1.16041	1.4522				5	6	18.9207	19.107	19.1358	19.1458	1.20851	0.238285	0.0638724	0.0124711	18.8004	19.2194	19.1778	NaN	19.4528	19.1137	18.8776	18.109	NaN	NaN	19.4832	19.1358	20.4902	17.3854	+				+						+
Q8VDI7	Ubac1	Ubiquitin-associated domain-containing protein 1	Ubac1	Ubac1	-1.42623	0	1	0	0.409136	0.0522466	2.21584				1	3	16.4799	17.9061	16.4799	17.7284	NaN	0.344319	NaN	0.0192291	18.303	NaN	NaN	NaN	NaN	17.7284	17.687	NaN	NaN	NaN	16.4799	NaN	NaN	NaN
Q8VDP4	Ccar2	Cell cycle and apoptosis regulator protein 2	Ccar2	Ccar2	-0.0786288	0.284552	0.630627	-0.663854	2.27191	1.48308	1.76595				7	7	20.9615	21.0401	20.9088	21.0403	0.308095	0.0572559	0.0146982	0.00272128	21.0403	21.0096	21.0445	21.0542	20.9818	21.1547	20.9955	21.4485	20.9068	20.9088	20.9274	21.2002	20.4483	20.8902
Q8VE97	Srsf4	Serine/arginine-rich splicing factor 4	Srsf4	Srsf4	0.146208	0.243995	0.684832	0.587073	1.46417	0.891119	1.88157				5	7	20.8599	20.7137	20.9891	20.6838	0.592075	0.26039	0.0283834	0.0125709	20.62	20.352	20.7651	21.1807	20.6838	20.8471	20.547	20.4772	NaN	NaN	20.0999	20.9891	21.6386	21.0946
Q8VHB5	Ca9	Carbonic anhydrase 9	Ca9	Ca9	0.555645	1.06744	0.144784	1.88838	0.104137	0.741883	1.90785				6	7	20.1113	19.5557	20.2373	19.7285	0.657297	0.39088	0.0326829	0.0199881	19.7285	19.5119	19.7327	19.7897	19.3316	19.9887	18.8066	NaN	19.9362	20.0891	20.3856	20.6711	20.6698	18.9161
Q91VC3	Eif4a3	Eukaryotic initiation factor 4A-III	Eif4a3	Eif4a3	-0.207014	0.601722	0.329112	-1.20833	0.392175	0.418427	1.56281				7	7	21.7292	21.9362	21.6655	21.9976	0.335812	0.304451	0.0154544	0.0138789	21.7355	22.2207	22.0989	21.5888	22.3324	21.5798	21.9976	21.6682	21.6326	22.3875	21.4814	21.6655	21.3637	21.9057
Q91VC7	Ppp1r14a	Protein phosphatase 1 regulatory subunit 14A	Ppp1r14a	Ppp1r14a	0.296158	0.514268	0.392632	1.07356	0.801326	0.827506	1.95137				6	7	22.538	22.2418	22.4097	22.3424	0.684562	0.245431	0.0303737	0.0110347	22.3974	22.3424	21.7342	22.4248	22.1372	22.3991	22.2578	22.1091	23.0612	NaN	21.8546	21.9396	22.7103	23.5532
Q91VM5	Rbmxl1	RNA binding motif protein, X-linked-like-1	Rbmxl1	Rbmxl1	0.299605	0.485953	0.41679	1.02667	0.732834	1.77231	1.89235				6	7	21.9546	21.655	21.9894	21.7948	0.628651	0.418419	0.0286341	0.019322	20.9022	21.3606	21.8496	22.1451	21.7948	21.5733	21.9596	21.3229	21.8653	NaN	21.1908	22.1135	22.819	22.4163
Q91WM6	Eva1a	Protein eva-1 homolog A	Eva1a	Eva1a	1.27017	0	1	0	0.0646446	0.0046992	1.46758				1	3	19.0607	17.7905	19.0607	18.0234	NaN	0.485742	NaN	0.0273034	NaN	NaN	NaN	NaN	18.0234	17.2322	18.116	NaN	NaN	NaN	NaN	NaN	NaN	19.0607
Q91WQ9	Calml4	Calmodulin-like protein 4	Calml4	Calml4	0.855274	1.26978	0.11611	2.18564	0.956723	1.91316	1.5577				5	7	20.6843	19.829	21.0524	20.1032	0.723663	0.628683	0.0349862	0.0317053	20.1032	19.9455	20.385	20.1889	18.8756	20.3129	18.9918	21.0524	NaN	19.5653	20.3465	21.2454	21.2117	NaN
Q91WT8	Rbm47	RNA-binding protein 47	Rbm47	Rbm47	-0.359071	0.487898	0.416144	-1.02592	0.68272	1.17801	2.09053				7	7	20.0482	20.4072	20.3598	20.5159	0.821939	0.426504	0.0409982	0.0208996	20.8121	20.491	20.8486	20.5358	19.7336	20.5159	19.9137	20.8869	20.6424	20.3598	18.8941	20.8337	19.3147	19.4056
Q91XV3	Basp1	Brain acid soluble protein 1	Basp1	Basp1	0.141589	0.166829	0.793975	0.422165	0.862419	0.00594166	1.49874				6	7	20.1304	19.9888	20.0551	20.0035	0.712049	0.493706	0.0353718	0.0246991	20.0035	19.8783	19.2825	20.1815	19.5413	20.2389	20.7958	19.9384	19.8223	NaN	19.0384	20.1718	20.9633	20.8483											+
Q91ZJ5	Ugp2	UTP--glucose-1-phosphate uridylyltransferase	Ugp2	Ugp2	-0.281671	0.610377	0.324103	-1.22176	0.0769623	1.58875	1.51963				7	7	21.6147	21.8964	21.6678	21.9905	0.532957	0.296676	0.0246572	0.0135491	22.2933	21.9905	22.0926	21.6198	21.6698	22.1029	21.5056	22.0067	20.8184	22.3764	21.6678	21.8379	21.5013	21.0943
Q91ZR1	Rab4b	Ras-related protein Rab-4B	Rab4b	Rab4b	-0.273374	0.39257	0.504375	-0.869469	0.507385	0.038864	1.39414				5	7	19.8077	20.0811	20.1754	20.0336	0.740962	0.338436	0.0374077	0.0168534	20.501	19.6784	19.7334	20.1646	20.0336	19.9324	20.5244	NaN	20.2193	NaN	19.0063	20.1754	19.0286	20.6091
Q91ZW2	Pofut1	GDP-fucose protein O-fucosyltransferase 1	Pofut1	Pofut1	-1.26065	0	0.9881	0	1.11208	0.837954	2.24669				1	4	16.4152	17.6758	16.4152	17.7345	NaN	0.62257	NaN	0.0352215	NaN	17.367	18.1019	NaN	16.9543	NaN	18.2802	NaN	NaN	NaN	16.4152	NaN	NaN	NaN
Q920Q4	Vps16	Vacuolar protein sorting-associated protein 16 homolog	Vps16	Vps16	0.699315	0.865062	0.197163	1.60662	0.438268	0.192112	2.02147				6	7	22.7179	22.0186	22.5496	21.9762	1.09544	0.349565	0.0482193	0.0158759	21.7388	22.0828	21.8605	22.6754	22.1842	21.9762	21.6122	21.9806	22.827	NaN	21.5555	23.0013	24.6709	22.2721
Q921D4	Med6	Mediator of RNA polymerase II transcription subunit 6	Med6	Med6	-0.134483	0.352278	0.546803	-0.878508	1.31515	0.726821	1.64561				3	2	17.1607	17.2951	17.1135	17.2951	0.153677	0.192687	0.00895521	0.0111411	NaN	17.4314	NaN	NaN	NaN	17.1589	NaN	NaN	NaN	NaN	17.3324	17.1135	NaN	17.0361
Q922B1	Macrod1	O-acetyl-ADP-ribose deacetylase MACROD1	Macrod1	Macrod1	-1.65588	1.10738	0.135041	-2.06234	0.281786	2.32536	1.69371				2	7	17.5838	19.2397	17.5838	19.5249	0.221819	1.07785	0.0126149	0.056022	17.5554	20.1618	20.451	18.1259	19.5249	19.889	18.9701	17.7407	NaN	NaN	NaN	17.427	NaN	NaN
Q924A2	Cic	Protein capicua homolog	Cic	Cic	1.45431	1.28002	0.115217	2.19958	0.209218	0.260794	1.54215				5	7	19.6121	18.1578	18.9214	18.1149	1.74384	0.312601	0.0889166	0.0172158	18.6497	17.9795	18.1495	17.6984	18.4566	18.1149	18.0562	NaN	22.1874	20.559	18.4703	17.9226	NaN	18.9214
Q99J83	Atg5	Autophagy protein 5	Atg5	Atg5	-0.95932	0	0.979076	0	0.274715	0.693278	1.5191				1	5	15.7213	16.6806	15.7213	16.6238	NaN	0.676001	NaN	0.0405261	16.6238	15.694	17.4954	NaN	17.0789	16.511	NaN	15.7213	NaN	NaN	NaN	NaN	NaN	NaN
Q99JI4	Psmd6	26S proteasome non-ATPase regulatory subunit 6	Psmd6	Psmd6	-0.215857	1.07315	0.144498	-1.88068	0.581888	3.07072	2.73307				7	7	21.5323	21.7481	21.514	21.7394	0.286597	0.100389	0.0133101	0.00461598	21.8911	21.7229	21.8666	21.7446	21.7394	21.627	21.6452	21.5963	21.514	22.0427	21.4817	21.6089	21.0832	21.399
Q99JX3	Gorasp2	Golgi reassembly-stacking protein 2	Gorasp2	Gorasp2	0.265539	0.517555	0.390585	1.07895	1.05051	1.1589	2.2258				6	7	22.0177	21.7521	22.1077	21.7536	0.471079	0.416925	0.0213955	0.0191671	21.7536	21.5838	21.6524	22.5057	21.1046	21.8805	21.7843	21.6818	22.0146	NaN	21.3143	22.2007	22.6702	22.2244
Q99JX7	Nxf1	Nuclear RNA export factor 1	Nxf1	Nxf1	0.105419	0.328389	0.576515	0.749169	1.49123	2.80491	2.11332				6	7	20.6946	20.5892	20.637	20.6222	0.327747	0.166628	0.0158373	0.00809295	20.3349	20.5519	20.4239	20.8023	20.6222	20.6474	20.7419	20.6719	20.2458	NaN	20.6022	20.9303	21.1883	20.5293
Q99K70	Rragc	Ras-related GTP-binding protein C	Rragc	Rragc	0.99375	0.803115	0.225668	1.61538	0.00954824	0.141979	1.34391				2	6	19.1419	18.1482	19.1419	18.1621	0.804829	0.742736	0.0420454	0.0409263	18.3031	16.891	19.128	NaN	18.5435	18.0022	18.0211	18.5728	NaN	NaN	NaN	NaN	NaN	19.711
Q99LS3	Psph	Phosphoserine phosphatase	Psph	Psph	-0.913724	1.1907	0.125976	-2.14312	1.10544	1.77276	1.34913				3	7	18.6851	19.5989	19.0835	19.6349	0.771844	0.557126	0.0413079	0.0284265	19.7107	19.6349	19.7307	19.5115	20.4634	19.5791	18.5617	19.1764	NaN	NaN	19.0835	NaN	NaN	17.7955		+					+
Q99MB7	Rnf141	RING finger protein 141	Rnf141	Rnf141	1.21368	0	0.993551	0	1.38794	1.53278	2.19112				1	5	18.7408	17.5271	18.7408	17.5692	NaN	0.277449	NaN	0.0158297	NaN	17.5692	17.7897	NaN	17.1888	17.7911	17.2968	NaN	NaN	NaN	NaN	18.7408	NaN	NaN
Q99MJ6	Pdzd3	Na(+)/H(+) exchange regulatory cofactor NHE-RF4	Pdzd3	Pdzd3	0.508801	0	1	0	0.885916	0.40769	1.52608				1	3	19.3342	18.8254	19.3342	18.8816	NaN	0.325361	NaN	0.0172831	NaN	NaN	19.119	NaN	NaN	18.8816	18.4756	NaN	NaN	NaN	NaN	19.3342	NaN	NaN
Q99MR3	Slc12a9	Solute carrier family 12 member 9	Slc12a9	Slc12a9	-0.58295	0.655582	0.298993	-1.32737	0.233217	0.0213485	1.31259				4	6	17.2415	17.8245	17.1296	17.9817	0.428702	0.793957	0.0248646	0.0445431	18.371	17.0588	18.0974	NaN	18.8223	16.7313	17.8659	17.1779	NaN	NaN	16.8551	17.0813	NaN	17.8517
Q99MR8	Mccc1	Methylcrotonoyl-CoA carboxylase subunit alpha, mitochondrial	Mccc1	Mccc1	-0.710533	0.915689	0.18323	-1.67836	0.107673	3.16138	1.78687				6	7	19.5595	20.27	19.7409	20.2888	1.0637	0.344483	0.0543831	0.0169947	20.4864	20.2888	20.7788	19.7063	20.118	20.4357	20.076	20.1645	NaN	19.3173	20.6839	20.4292	17.9151	18.8468
Q99N80	Sytl1	Synaptotagmin-like protein 1	Sytl1	Sytl1	0.855771	1.20738	0.124341	2.0576	0.582465	0.667801	1.54592				7	7	20.0326	19.1768	20.256	19.4527	0.882005	0.657966	0.0440285	0.0343105	18.5985	19.4527	20.002	19.6167	18.9988	19.482	18.087	19.951	18.1997	20.256	20.6368	20.3643	20.9058	19.9145
Q9CPR7	Sike1	Suppressor of IKBKE 1	Sike1	Sike1	-0.220525	0	0.99865	0	1.7434	2.52293	1.84349				1	4	16.3146	16.5351	16.3146	16.4759	NaN	0.196423	NaN	0.0118791	16.8186	NaN	16.4996	NaN	16.4523	16.37	NaN	16.3146	NaN	NaN	NaN	NaN	NaN	NaN
Q9CPW4	Arpc5	Actin-related protein 2/3 complex subunit 5	Arpc5	Arpc5	0.428843	0.849954	0.202418	1.57487	0.146797	0.600477	1.58935				7	7	23.227	22.7982	23.1784	22.7746	0.580883	0.426168	0.0250089	0.018693	22.7674	22.8095	22.1524	23.4996	22.4928	23.0911	22.7746	22.8037	23.7686	23.0563	22.2836	23.1784	23.9553	23.5434
Q9CQ92	Fis1	Mitochondrial fission 1 protein	Fis1	Fis1	0.257293	0.770651	0.238151	1.47002	0.0532536	2.3787	1.44148				6	7	21.0605	20.8033	21.1422	20.7183	0.333161	0.298249	0.0158192	0.0143366	20.8341	20.7183	20.5982	21.412	20.9061	20.5794	20.5747	20.9414	21.397	NaN	20.4569	21.1495	21.2836	21.1349
Q9CQE5	Rgs10	Regulator of G-protein signaling 10	Rgs10	Rgs10	0.132194	0.214815	0.726036	0.526832	1.4383	0.195696	2.06181				5	7	18.7142	18.582	18.4405	18.587	0.590571	0.271198	0.0315574	0.0145947	18.4517	18.2096	18.3957	18.6867	18.6816	19.0616	18.587	19.4618	NaN	NaN	18.4405	19.2232	18.1251	18.3203
Q9CQQ8	Lsm7	U6 snRNA-associated Sm-like protein LSm7	Lsm7	Lsm7	0.807123	1.0646	0.145737	1.90311	0.0181716	0.940135	1.39795				5	7	21.4216	20.6145	21.3162	20.3777	0.899804	0.578434	0.0420046	0.0280596	20.3777	20.8181	20.1012	21.8022	20.3318	20.6491	20.2211	21.3162	NaN	NaN	20.3251	20.8162	22.2119	22.4385
Q9CQZ6	Ndufb3	NADH dehydrogenase [ubiquinone] 1 beta subcomplex subunit 3	Ndufb3	Ndufb3	0.141031	0.18028	0.777442	0.454449	0.72028	0.573832	1.33774				5	6	21.8531	21.712	21.9913	21.5491	0.641563	0.378807	0.029358	0.0174468	NaN	21.5723	21.9908	21.4368	21.526	22.3517	21.3947	NaN	21.9913	NaN	21.6043	22.4129	22.3871	20.8698
Q9CR08	Pop4	Ribonuclease P protein subunit p29	Pop4	Pop4	-2.1828	0	0.995336	0	0.446583	0.646324	1.60467				1	4	15.1566	17.3394	15.1566	17.3333	NaN	0.610995	NaN	0.0352374	NaN	NaN	17.8042	NaN	17.927	16.7639	16.8625	NaN	NaN	NaN	15.1566	NaN	NaN	NaN
Q9CT10	Ranbp3	Ran-binding protein 3	Ranbp3	Ranbp3	0.100672	0.174797	0.781401	0.439716	0.808249	1.51025	1.34942				6	7	20.8873	20.7866	20.8116	20.7689	0.533679	0.270416	0.0255504	0.0130091	20.4951	20.5728	20.6522	21.3156	20.7689	20.879	20.8228	20.8489	20.7743	NaN	20.0279	21.4226	20.7565	21.4936
Q9CVB6	Arpc2	Actin-related protein 2/3 complex subunit 2	Arpc2	Arpc2	-0.579117	1.16623	0.130821	-2.02186	0.313429	0.325876	1.34014				6	7	22.2303	22.8094	22.0959	22.7728	0.738732	0.176533	0.0332309	0.00773949	23.0262	22.6989	22.899	22.5343	22.7728	23.0015	22.7331	23.4163	21.7104	NaN	21.3548	21.9946	22.1972	22.7084
Q9CWS0	Ddah1	N(G),N(G)-dimethylarginine dimethylaminohydrolase 1	Ddah1	Ddah1	0.225971	0.355732	0.546961	0.797194	0.490746	2.34835	1.56739				7	7	21.833	21.607	21.9596	21.5746	0.702366	0.262909	0.03217	0.0121678	21.3105	21.5746	21.6136	22.059	21.3347	21.8145	21.5421	21.6314	22.2748	20.5017	21.5159	22.3896	22.5578	21.9596
Q9CX00	Ist1	IST1 homolog	Ist1	Ist1	0.273341	0.77778	0.23535	1.48048	0.640577	0.410686	1.58506				6	7	21.3818	21.1084	21.3511	21.0793	0.402071	0.259209	0.0188044	0.0122799	21.1161	20.7588	21.0118	21.0062	21.1724	21.6145	21.0793	21.1382	21.326	NaN	20.8022	21.7276	21.9206	21.3761
Q9CX80	Cygb	Cytoglobin	Cygb	Cygb	-0.370129	0.837601	0.20791	-1.5574	0.0480425	2.81517	1.628				7	7	20.4744	20.8445	20.6387	20.8746	0.565993	0.273901	0.027644	0.0131402	20.8537	20.8791	21.0966	20.2882	21.1152	20.804	20.8746	20.7258	20.0527	20.6387	21.0256	19.8413	19.8306	21.2058
Q9CXI0	Coq5	2-methoxy-6-polyprenyl-1,4-benzoquinol methylase, mitochondrial	Coq5	Coq5	-0.56057	0.888243	0.189465	-1.81434	0.7227	2.63005	1.72474				2	5	18.1902	18.7508	18.1902	18.7039	0.172039	0.403813	0.00945774	0.0215357	18.7752	18.7039	19.3885	NaN	18.2795	18.607	NaN	18.0686	NaN	NaN	NaN	18.3119	NaN	NaN
Q9CY27	Tecr	Very-long-chain enoyl-CoA reductase	Tecr	Tecr	-0.233043	0.450029	0.449553	-0.962507	0.397223	0.530252	1.79379				7	7	21.7121	21.9452	21.6922	21.8576	0.505733	0.393179	0.0232926	0.0179164	21.7473	22.1774	22.5445	21.8576	22.1487	21.8399	21.3009	21.4136	21.4982	22.7349	21.6922	21.7191	21.8023	21.1247
Q9CY50	Ssr1	Translocon-associated protein subunit alpha	Ssr1	Ssr1	0.378814	0.857315	0.198351	1.59556	0.237075	3.26869	2.00905				6	7	22.8084	22.4296	22.8656	22.3756	0.360461	0.474964	0.0158039	0.0211758	22.3756	21.9214	22.0997	23.1963	21.9658	22.6647	22.7836	22.6813	23.0899	22.1782	NaN	22.7657	22.9655	23.1698
Q9CYZ2	Tpd52l2	Tumor protein D54	Tpd52l2	Tpd52l2	0.409898	0.860325	0.197563	1.59986	0.0568801	1.02528	1.41817				6	7	22.0412	21.6313	22.0005	21.5023	0.629592	0.241841	0.0285644	0.0111802	21.4889	21.5023	21.3464	22.0438	21.4981	21.8272	21.7123	21.0363	22.0249	NaN	21.9761	21.8643	22.936	22.4095
Q9CZ04	Cops7a	COP9 signalosome complex subunit 7a	Cops7a	Cops7a	-0.506617	1.29007	0.114128	-2.21325	0.622905	0.298569	1.36174				5	7	20.6096	21.1163	20.697	21.2376	0.561893	0.210286	0.0272636	0.00995849	20.7238	21.2747	20.9883	21.0429	21.2376	21.2587	21.2878	20.3297	19.8095	NaN	NaN	20.9578	20.697	21.2542
Q9CZJ2	Hspa12b	Heat shock 70 kDa protein 12B	Hspa12b	Hspa12b	-0.501475	1.01543	0.161081	-1.88266	0.122774	3.04839	1.30572				4	6	18.7659	19.2673	18.8391	19.3226	0.526407	0.325864	0.0280513	0.0169128	19.4751	19.3056	19.3396	NaN	19.2748	18.6419	19.5671	19.0861	NaN	NaN	18.1062	18.5921	NaN	19.2791
Q9CZM2	Rpl15	60S ribosomal protein L15	Rpl15	Rpl15	-0.103614	0.213322	0.72687	-0.520925	0.817948	1.31558	1.52397				7	7	25.4303	25.5339	25.3316	25.4627	0.370586	0.373638	0.0145726	0.014633	25.4406	25.4627	25.8088	26.0939	25.7073	24.956	25.2681	25.3316	25.7392	25.7215	24.8665	25.1967	25.2483	25.9083
Q9D0F6	Rfc5	Replication factor C subunit 5	Rfc5	Rfc5	-0.528683	0.608922	0.324051	-1.24071	0.295003	0.00325403	2.12425				4	7	18.1512	18.6799	18.0476	18.6817	1.0826	0.327513	0.0596436	0.0175329	19.2379	18.875	18.7118	18.6214	18.6817	18.4258	18.2054	19.3842	NaN	NaN	18.7265	17.1252	NaN	17.3688
Q9D0K1	Pex13	Peroxisomal membrane protein PEX13	Pex13	Pex13	0.4321	0.628435	0.31659	1.29846	0.677021	2.32627	1.41031				3	6	18.0737	17.6416	18.1556	17.7471	0.309834	0.521229	0.0171428	0.0295455	NaN	17.6585	17.8926	16.7006	18.2397	17.8357	17.5223	NaN	NaN	NaN	18.3343	18.1556	NaN	17.7311
Q9D0S9	Hint2	Histidine triad nucleotide-binding protein 2, mitochondrial	Hint2	Hint2	0.205143	0.376141	0.521787	0.833968	0.85038	2.87994	2.15624				7	7	21.7914	21.5862	21.5829	21.6199	0.583917	0.287399	0.0267958	0.013314	21.4646	21.8342	21.8948	21.6199	21.1159	21.8126	21.3615	21.3424	22.6494	22.34	21.2238	22.1614	21.5829	21.2396
Q9D1G1	Rab1b	Ras-related protein Rab-1B	Rab1b	Rab1b	-0.559183	0.984789	0.169309	-1.79096	0.451789	0.31074	1.95575				5	7	20.3067	20.8658	20.2232	20.7508	0.695355	0.389276	0.0342427	0.0186561	20.5664	20.9706	21.1498	20.7508	20.4204	21.5516	20.6513	20.2232	20.0191	NaN	21.432	20.3126	NaN	19.5464
Q9D2Q8	S100a14	Protein S100-A14	S100a14	S100a14	0.0859125	0.142492	0.828826	0.367401	0.971313	0.77575	1.5461				6	7	22.7877	22.7018	22.8337	22.758	0.387319	0.44594	0.0169969	0.0196434	23.112	22.5552	22.3883	23.3028	22.758	22.8201	21.976	22.9315	22.665	NaN	22.1095	23.1261	23.1581	22.7359
Q9D2V8	Mfsd10	Major facilitator superfamily domain-containing protein 10	Mfsd10	Mfsd10	-0.471955	0.624783	0.318418	-1.29236	0.114703	0.151494	1.31195				4	5	18.2459	18.7179	18.3564	18.7707	0.72032	0.359842	0.0394784	0.0192245	NaN	18.2992	19.1448	NaN	18.9664	18.4083	18.7707	18.8901	NaN	NaN	17.927	17.3808	NaN	18.7858
Q9D5T0	Atad1	ATPase family AAA domain-containing protein 1	Atad1	Atad1	-0.142414	0.197149	0.750828	-0.486883	1.22215	1.94313	2.04745				7	7	20.2706	20.413	20.2588	20.3552	0.686765	0.356727	0.0338798	0.0174754	20.0586	20.359	21.1109	20.3552	20.6118	20.2771	20.1187	20.0458	20.6548	21.3397	19.2016	20.6061	20.2588	19.7876
Q9D6U8	Fam162a	Protein FAM162A	Fam162a	Fam162a	-0.144471	0.267283	0.650918	-0.630164	0.916085	2.80179	1.58279				7	7	21.0169	21.1613	20.9372	21.2053	0.426548	0.431251	0.0202955	0.0203792	21.2053	21.0798	21.6424	20.3846	21.6332	21.2339	20.9501	21.642	20.6075	21.4496	20.9372	21.1848	20.507	20.7899
Q9D710	Tmx2	Thioredoxin-related transmembrane protein 2	Tmx2	Tmx2	0.010875	0.0215772	1	0.0625	1.98433	2.14688	1.537				4	7	20.1734	20.1625	20.1994	20.1067	0.252542	0.289329	0.0125186	0.0143499	20.2796	20.0556	20.0834	20.7229	20.1067	20.1161	19.7732	20.1594	NaN	NaN	19.8429	20.2393	NaN	20.4519
Q9D735	Trir	Telomerase RNA component interacting RNase	Trir	Trir	0.726015	0.939309	0.179674	1.7263	0.826899	1.42259	2.43244				5	7	20.8176	20.0916	20.8058	20.2045	0.72697	0.712366	0.0349209	0.0354559	19.8374	20.3531	19.0396	21.2619	19.5283	20.2045	20.4163	20.8058	NaN	NaN	20.1697	21.2054	21.8215	20.0856
Q9D7F7	Chmp4c	Charged multivesicular body protein 4c	Chmp4c	Chmp4c	0.661708	0.935882	0.178151	1.76304	0.174166	0.869204	1.81727				4	6	19.0008	18.3391	19.239	18.3365	0.671285	0.52015	0.0353292	0.0283629	NaN	17.8246	18.9476	18.5565	18.1165	18.8502	17.7393	19.3424	18.0198	NaN	19.1357	19.5054	NaN	NaN
Q9D7M8	Polr2d	DNA-directed RNA polymerase II subunit RPB4	Polr2d	Polr2d	0.353297	0.510281	0.395273	1.07859	0.548417	1.52524	1.63628				4	7	19.9827	19.6294	19.7892	19.5625	0.725206	0.383014	0.0362916	0.0195123	19.6792	19.3656	19.1635	20.3509	19.4609	19.8234	19.5625	19.4942	NaN	NaN	NaN	19.3845	20.0841	20.9681
Q9D7Z6	Clca1	Calcium-activated chloride channel regulator 1	Clca1	Clca1	0.528186	0.278367	0.636021	0.651853	0.375891	4.59177	1.3584				7	7	23.8091	23.2809	23.8684	24.0333	1.37006	1.64889	0.0575437	0.070826	23.6757	24.0333	24.9277	24.2432	20.7978	24.2217	21.0668	23.8684	24.3478	23.5851	23.8257	24.8458	25.1959	20.9948
Q9D880	Timm50	Mitochondrial import inner membrane translocase subunit TIM50	Timm50	Timm50	0.420626	1.20443	0.12388	2.07294	0.157831	0.609813	1.80093				6	7	21.1953	20.7747	21.1741	20.8539	0.419303	0.312031	0.0197828	0.0150198	20.8713	20.5483	20.8578	21.3277	20.3533	20.8539	20.6103	21.1858	21.7957	NaN	21.1623	20.8178	21.5285	20.6816
Q9D8G5	Reg4	Regenerating islet-derived protein 4	Reg4	Reg4	0.689542	0.674716	0.287865	1.35811	0.252448	4.01622	1.55458				4	6	20.5215	19.8319	20.6149	20.0906	0.37979	0.950437	0.018507	0.0479246	20.0899	19.537	20.8056	20.3811	NaN	20.0914	18.0866	20.5223	20.7074	NaN	20.8644	19.9918	NaN	NaN
Q9DAP7	Asf1b	Histone chaperone ASF1B	Asf1b	Asf1b	0.7489	1.24609	0.121013	2.12834	0.15686	1.11725	1.71219				6	7	20.9113	20.1624	20.571	19.895	0.602445	0.656435	0.0288096	0.0325574	20.4887	19.895	19.6624	21.47	20.1946	19.8593	19.5668	20.5061	20.5055	NaN	20.636	20.4578	21.7784	21.584
Q9DB85	Rrp8	Ribosomal RNA-processing protein 8	Rrp8	Rrp8	0.54504	1.21803	0.124126	2.41446	0.218333	0.798741	1.43258				2	5	17.8226	17.2776	17.8226	17.3673	0.139017	0.29354	0.00780005	0.0169897	NaN	17.4545	17.0655	NaN	16.8905	17.3673	17.61	NaN	NaN	NaN	NaN	17.9209	NaN	17.7243
Q9DB96	Ngdn	Neuroguidin	Ngdn	Ngdn	-0.193366	0	1	0	1.77637	0.0455563	2.16322				1	3	16.7008	16.8942	16.7008	16.8914	NaN	0.0122866	NaN	0.000727266	NaN	NaN	NaN	NaN	16.8835	16.8914	16.9076	NaN	NaN	NaN	NaN	16.7008	NaN	NaN
Q9DBE0	Csad	Cysteine sulfinic acid decarboxylase	Csad	Csad	-0.566588	0.881129	0.189914	-1.62949	0.093744	4.83893	1.55311				6	7	20.0692	20.6358	20.239	20.6009	0.843843	0.350302	0.0420467	0.0169755	20.6009	20.8573	21.2979	20.301	20.4223	20.6351	20.3359	20.809	20.1326	NaN	18.7295	20.9423	19.4563	20.3454
Q9DBJ1	Pgam1	Phosphoglycerate mutase 1	Pgam1	Pgam1	-0.477258	1.14936	0.133034	-1.98164	0.279613	1.6056	1.48839				7	7	23.0355	23.5127	22.9149	23.6588	0.591855	0.236077	0.0256932	0.0100404	23.2084	23.6915	23.6874	23.7423	23.3873	23.6588	23.2135	22.501	23.4208	24.1419	22.7971	22.9149	22.4256	23.0471
Q9DC61	Pmpca	Mitochondrial-processing peptidase subunit alpha	Pmpca	Pmpca	-0.302514	1.28292	0.115324	-2.1555	0.0500658	1.20068	1.95418				7	7	20.6005	20.903	20.5337	20.9272	0.33047	0.169316	0.0160418	0.00810009	20.6704	20.9272	20.9764	21.0177	20.8883	21.1418	20.6992	20.5337	20.1442	20.81	20.937	21.0214	20.3086	20.4485
Q9DCL9	Paics	Multifunctional protein ADE2	Paics	Paics	-0.112586	0.24056	0.686183	-0.576856	1.90971	1.78417	1.43078				7	7	21.3251	21.4377	21.1351	21.4555	0.50626	0.101709	0.0237401	0.0047444	21.496	21.415	21.2403	21.4615	21.5722	21.4555	21.4231	20.9516	21.717	22.2915	21.2479	21.1351	21.0407	20.8917		+				+
Q9EPM5	Sync	Syncoilin	Sync	Sync	-2.68778	0	1	0	0.711394	1.01047	1.60425				1	4	15.4359	18.1237	15.4359	18.1202	NaN	0.648531	NaN	0.0357836	NaN	NaN	18.9028	NaN	17.3514	18.291	17.9495	NaN	NaN	NaN	NaN	15.4359	NaN	NaN
Q9ERN0	Scamp2	Secretory carrier-associated membrane protein 2	Scamp2	Scamp2	-0.402828	0.92861	0.17881	-1.68464	0.716567	0.281406	2.3843				7	7	20.0553	20.4581	20.0042	20.2424	0.514143	0.368648	0.0256363	0.0180197	21.0426	20.6437	20.8025	20.1574	20.2082	20.1098	20.2424	20.7546	19.9941	19.9621	20.0042	20.534	19.1332	20.0046
Q9ES00	Ube4b	Ubiquitin conjugation factor E4 B	Ube4b	Ube4b	-0.364409	0.928624	0.179552	-1.75206	0.405086	0.167242	1.90518				4	6	17.8766	18.241	17.867	18.3923	0.333662	0.315147	0.0186648	0.0172769	17.7517	18.4096	18.5181	NaN	18.4507	17.9409	18.3749	18.2067	NaN	NaN	17.6139	18.1201	NaN	17.5656
Q9ESN6	Trim2	Tripartite motif-containing protein 2	Trim2	Trim2	0.843957	1.04833	0.150192	1.97018	2.0051	3.7916	1.48423				2	7	19.4123	18.5683	19.4123	18.5601	0.807798	0.473559	0.0416127	0.0255036	18.9603	18.7696	19.3137	18.1476	18.0631	18.5601	18.164	18.8411	NaN	NaN	NaN	19.9835	NaN	NaN
Q9JHW2	Nit2	Omega-amidase NIT2	Nit2	Nit2	-0.244986	0.549357	0.363089	-1.12582	0.21906	1.58674	1.32646				7	7	19.7961	20.0411	19.8706	19.962	0.523568	0.239473	0.026448	0.0119491	20.2934	19.962	20.2802	19.8711	19.9201	20.2687	19.6923	20.4038	19.8706	20.1915	19.6787	19.6278	18.7846	20.0159
Q9JIF7	Copb1	Coatomer subunit beta	Copb1	Copb1	-0.326872	0.931509	0.178733	-1.68864	0.241757	0.186508	1.83871				7	7	22.0348	22.3617	22.1886	22.3881	0.455899	0.233335	0.0206899	0.0104346	22.1333	22.3881	22.6998	22.0214	22.43	22.5517	22.3076	21.9891	22.2119	22.3353	22.1886	22.6423	21.5357	21.3409
Q9JII6	Akr1a1	Alcohol dehydrogenase [NADP(+)]	Akr1a1	Akr1a1	-0.344486	0.766011	0.240614	-1.45475	0.383827	1.37272	2.03317				7	7	21.447	21.7915	21.5829	21.711	0.419093	0.465704	0.0195408	0.0213709	21.5719	22.0167	22.668	21.711	21.8507	21.5252	21.1972	21.5829	21.8763	21.7173	21.3661	21.7337	21.198	20.655
Q9JIK9	Mrps34	28S ribosomal protein S34, mitochondrial	Mrps34	Mrps34	-0.151497	0.250779	0.676783	-0.600815	1.03717	1.01724	1.39387				5	7	19.5786	19.7301	19.4117	19.5786	0.544684	0.333598	0.0278204	0.0169081	19.5782	19.4611	20.429	19.5786	19.8137	19.7509	19.4989	20.3275	19.4117	NaN	18.9331	19.9097	NaN	19.3108
Q9JIW9	Ralb	Ras-related protein Ral-B	Ralb	Ralb	0.30205	0.798985	0.226388	1.51144	0.410042	1.53233	1.68782				6	7	21.5357	21.2336	21.5625	21.2997	0.463049	0.240569	0.0215015	0.0113296	20.775	21.2794	21.3779	21.4926	21.2997	21.3484	21.0622	20.9852	21.9356	NaN	21.0377	21.6178	22.1303	21.5073
Q9JIY2	Cbll1	E3 ubiquitin-protein ligase Hakai	Cbll1	Cbll1	-1.71937	0	1	0	0.072041	0.42535	1.56741				1	3	15.4757	17.1951	15.4757	17.3599	NaN	0.467764	NaN	0.0272034	NaN	16.6672	17.3599	NaN	17.5581	NaN	NaN	NaN	NaN	NaN	NaN	15.4757	NaN	NaN
Q9JIZ9	Plscr3	Phospholipid scramblase 3	Plscr3	Plscr3	-0.5241	1.14995	0.133627	-2.19278	0.287353	0.373644	1.38694				2	6	20.078	20.6021	20.078	20.5817	0.118512	0.316258	0.00590256	0.0153508	20.3279	20.3537	20.9154	NaN	20.936	20.2698	20.8098	19.9942	NaN	NaN	NaN	NaN	NaN	20.1618
Q9JKV1	Adrm1	Proteasomal ubiquitin receptor ADRM1	Adrm1	Adrm1	0.349043	0.3976	0.500457	0.874928	0.712679	0.85076	1.59521				6	7	20.8041	20.4551	20.7819	20.2682	0.885483	0.537841	0.0425629	0.0262938	20.6045	20.2682	19.9191	21.5487	20.1809	20.5437	20.1203	20.665	20.6337	NaN	19.3271	20.8987	22.0038	21.2963
Q9JL35	Hmgn5	High mobility group nucleosome-binding domain-containing protein 5	Hmgn5	Hmgn5	0.47086	0.483591	0.417863	1.02748	0.567662	0.102352	1.81057				5	7	20.1644	19.6935	20.5944	19.6798	1.00561	0.588817	0.0498705	0.0298991	19.6798	19.5857	19.1781	20.5072	18.8287	20.3169	19.7581	20.5944	NaN	NaN	19.2738	20.8433	21.1914	18.9189
Q9JLM9	Grb14	Growth factor receptor-bound protein 14	Grb14	Grb14	-1.56965	1.20287	0.123904	-2.38623	0.971918	1.03917	1.41931				2	5	18.5133	20.083	18.5133	20.1467	1.6028	0.361151	0.0865753	0.0179829	NaN	20.4774	19.4891	NaN	20.1416	20.1602	20.1467	NaN	19.6467	NaN	NaN	17.38	NaN	NaN
Q9JM62	Reep6	Receptor expression-enhancing protein 6	Reep6	Reep6	1.19488	0	1	0	0.639802	3.10695	3.56912				1	5	19.2884	18.0935	19.2884	18.0191	NaN	0.321393	NaN	0.0177629	NaN	NaN	18.3691	18.0191	17.7698	18.486	17.8236	NaN	NaN	NaN	NaN	19.2884	NaN	NaN
Q9JMC3	Dnaja4	DnaJ homolog subfamily A member 4	Dnaja4	Dnaja4	-1.32455	0	1	0	0.440846	0.736037	1.45637				1	4	16.8648	18.1894	16.8648	18.124	NaN	0.525693	NaN	0.0289011	18.0562	17.6212	18.8883	NaN	18.1917	NaN	NaN	16.8648	NaN	NaN	NaN	NaN	NaN	NaN
Q9JMD0	Znf207	BUB3-interacting and GLEBS motif-containing protein ZNF207	Znf207	Znf207	0.44232	0.731271	0.257063	1.4118	0.504308	0.0634522	2.07039				6	7	21.4503	21.008	21.785	21.0388	0.716309	0.392191	0.0333938	0.0186686	21.3344	21.0437	20.5289	21.5801	20.5012	21.0388	21.029	21.8754	21.9092	NaN	20.0652	21.2823	21.8267	21.7432
Q9QXB9	Drg2	Developmentally-regulated GTP-binding protein 2	Drg2	Drg2	-0.530814	0.937877	0.178843	-1.7426	0.133587	0.122173	1.44094				4	7	20.0283	20.5591	20.229	20.7316	0.592283	0.42294	0.0295723	0.0205719	20.5755	20.7316	20.8959	20.3582	20.876	19.6983	20.7783	20.4947	NaN	NaN	19.1605	20.2538	NaN	20.2042
Q9QXG2	Chm	Rab proteins geranylgeranyltransferase component A 1	Chm	Chm	0.238357	0.610925	0.325825	1.24393	0.371183	2.2764	1.39595				5	6	19.165	18.9267	19.0477	18.9788	0.239245	0.366682	0.0124834	0.0193738	NaN	19.1034	19.1244	18.3617	19.4067	18.8542	18.7097	19.5663	19.0477	NaN	19.2053	19.0009	NaN	19.005
Q9QXY1	Tjp3	Tight junction protein ZO-3	Tjp3	Tjp3	0.0945001	0.124788	0.86103	0.325701	0.955518	0.779829	1.50144				7	7	20.4516	20.3571	20.3938	20.4139	0.667082	0.379852	0.0326177	0.0186595	20.2531	20.5861	20.51	20.9382	19.9954	20.4139	19.8027	20.3938	19.8041	21.028	20.3264	21.4354	20.6633	19.5099
Q9QZ06	Tollip	Toll-interacting protein	Tollip	Tollip	0.151047	0.17949	0.776867	0.452715	1.27356	1.31628	1.56734				4	7	20.7525	20.6014	20.7021	20.5295	0.888183	0.174941	0.0427989	0.00849169	20.4766	20.5295	20.7548	20.9166	20.5898	20.4164	20.5263	20.4074	NaN	NaN	19.7582	NaN	21.8476	20.9967
Q9QZS3	Numb	Protein numb homolog	Numb	Numb	-0.594139	0.904211	0.187385	-1.69314	0.0417077	0.474819	1.42419				4	7	19.6396	20.2337	19.7902	20.236	0.679087	0.489474	0.0345775	0.024191	20.8926	20.0058	20.8289	19.5522	20.2507	20.236	19.8698	19.8542	NaN	NaN	19.7263	20.2903	NaN	18.6875
Q9R0Q7	Ptges3	Prostaglandin E synthase 3	Ptges3	Ptges3	0.518321	0.504701	0.398566	1.0578	0.141519	0.313709	1.31459				6	7	22.4103	21.892	22.5951	21.8858	1.20273	0.465475	0.0536683	0.0212623	22.5636	22.0856	21.299	22.3385	21.4778	21.8858	21.5939	22.6902	22.5	NaN	20.6076	21.6022	24.1358	22.9263
Q9WTK0	Nupr1	Nuclear protein 1	Nupr1	Nupr1	0.25	0	1	0	1.77491	2.07649	1.70351				1	4	15.9207	15.6707	15.9207	15.8507	NaN	0.659182	NaN	0.0420646	16.2024	NaN	15.5668	NaN	NaN	14.7791	16.1345	NaN	NaN	NaN	NaN	15.9207	NaN	NaN	+				+
Q9WTL7	Lypla2	Acyl-protein thioesterase 2	Lypla2	Lypla2	0.0592164	0.212509	0.726574	0.520481	1.13576	0.22561	1.6592				6	7	21.1316	21.0724	21.2094	21.0842	0.155851	0.237545	0.00737528	0.0112728	20.8753	21.1919	21.427	21.0757	21.0842	21.1681	20.6846	21.2056	21.2317	NaN	21.2732	20.9464	20.9196	21.2132
Q9WTP7	Ak3	GTP:AMP phosphotransferase AK3, mitochondrial	Ak3	Ak3	0.121175	0.153048	0.81173	0.391377	1.26807	0.501537	1.87717				6	7	23.2133	23.0921	23.2807	23.0101	0.698413	0.401618	0.0300867	0.017392	23.0101	22.9994	23.1824	23.2139	22.6272	23.8636	22.7484	22.7732	23.2989	NaN	23.2625	23.8269	24.0109	22.1075
Q9WU81	Slc37a2	Glucose-6-phosphate exchanger SLC37A2	Slc37a2	Slc37a2	1.1111	0.953655	0.177181	1.9316	0.0326073	3.62179	2.01261				2	5	18.8356	17.7245	18.8356	17.6847	0.221891	0.760623	0.0117804	0.0429137	NaN	NaN	18.2504	17.1713	16.8286	18.6875	17.6847	NaN	NaN	NaN	NaN	18.9925	NaN	18.6787
Q9WUU7	Ctsz	Cathepsin Z	Ctsz	Ctsz	0.728257	1.05968	0.146068	1.86268	0.0939843	0.141805	2.10009				7	7	23.1942	22.466	23.2387	22.2845	0.913905	0.484561	0.0394023	0.0215687	22.587	22.2845	22.0849	23.4426	22.62	22.0996	22.1431	23.2387	23.5626	21.8655	22.9449	22.5542	23.3872	24.8064
Q9WVA2	Timm8a1	Mitochondrial import inner membrane translocase subunit Tim8 A	Timm8a1	Timm8a1	0.86973	0.833341	0.208597	1.63163	0.0565467	0.054805	1.52969				5	4	19.2652	18.3955	19.0569	18.4511	0.920314	0.586506	0.0477708	0.0318832	19.0434	17.6362	NaN	18.5725	NaN	18.3297	NaN	19.0569	18.1015	NaN	NaN	18.9332	20.58	19.6543		+					+
Q9WVA4	Tagln2	Transgelin-2	Tagln2	Tagln2	0.0457429	0.084949	0.933854	0.229508	1.12685	2.14817	1.53646				7	7	24.6653	24.6196	24.6416	24.4721	0.392817	0.351796	0.0159259	0.0142893	24.3616	24.5636	24.2568	25.1761	24.4586	25.0484	24.4721	24.6416	24.6005	23.9114	24.7959	24.5784	25.1315	24.9981
Q9WVL2	Stat2	Signal transducer and activator of transcription 2	Stat2	Stat2	-0.597419	0.840221	0.207275	-1.61732	0.12544	0.62014	1.39913				3	7	18.0263	18.6237	17.7215	18.7409	0.622385	0.502923	0.0345266	0.0270045	17.5102	18.7773	18.9955	18.9177	18.7409	18.7184	18.7058	17.615	NaN	NaN	NaN	17.7215	NaN	18.7423	+				+
Q9Z0F4	Cib1	Calcium and integrin-binding protein 1	Cib1	Cib1	0.707925	0.792124	0.229504	1.71554	0.114602	0.0580152	1.5804				2	4	17.9004	17.1925	17.9004	17.2858	0.170624	0.541314	0.00953182	0.0314854	NaN	16.455	17.2017	NaN	17.3699	17.7435	NaN	NaN	NaN	NaN	17.7798	18.0211	NaN	NaN
Q9Z0F7	Sncg	Gamma-synuclein	Sncg	Sncg	0.086654	0.0626584	0.97572	0.173594	1.31006	0.310258	1.48808				5	7	20.7207	20.6341	20.1311	20.6114	1.23169	0.447116	0.0594422	0.0216688	20.3563	20.6114	20.2344	20.9095	20.0375	21.0787	21.2108	19.9061	NaN	NaN	19.5353	20.1311	21.6294	22.4018
Q9Z0H8	Clip2	CAP-Gly domain-containing linker protein 2	Clip2	Clip2	-0.374717	0.885565	0.189584	-1.64908	0.0275288	1.05136	1.45009				5	7	19.7838	20.1586	19.8503	20.1387	0.408781	0.373619	0.0206624	0.018534	20.8163	19.8946	20.1387	19.66	20.3124	19.9676	20.3203	20.2923	19.2632	NaN	19.4989	19.8503	NaN	20.0145
Q9Z0J0	Npc2	NPC intracellular cholesterol transporter 2	Npc2	Npc2	0.490875	0.899267	0.187552	1.66886	0.144204	0.264583	1.32384				5	7	20.7452	20.2543	20.5259	20.2755	0.589491	0.43463	0.0284158	0.0214587	20.5446	20.088	20.2051	20.7766	20.2755	20.4717	19.4185	20.5259	NaN	NaN	20.3934	20.208	21.6965	20.902
Q9Z108	Stau1	Double-stranded RNA-binding protein Staufen homolog 1	Stau1	Stau1	-0.91859	1.2244	0.127789	-2.09954	0.405607	0.163363	1.64888				6	7	18.5278	19.4464	19.247	19.4053	1.15763	0.130666	0.0624806	0.0067193	19.3235	19.58	19.4284	19.3405	19.3744	19.6724	19.4053	19.2586	16.6985	NaN	19.2353	19.2811	17.4283	19.2648
Q9Z1F9	Uba2	SUMO-activating enzyme subunit 2	Uba2	Uba2	0.319743	0.63743	0.310421	1.26338	0.371414	3.06132	1.97261				7	7	21.9621	21.6424	21.7607	21.5798	0.639895	0.197229	0.0291363	0.00911311	21.3913	21.5562	21.5225	22.006	21.7097	21.7312	21.5798	21.7607	21.5105	23.358	21.5467	21.6909	21.8444	22.0237
Q9Z1Y4	Trip6	Thyroid receptor-interacting protein 6	Trip6	Trip6	-0.468369	0.734588	0.25593	-1.41674	0.0618823	0.423244	1.4299				6	7	19.2655	19.7339	19.2343	19.7751	0.643248	0.550046	0.0333886	0.0278732	19.163	19.7619	19.956	18.8869	20.5041	19.7751	20.0902	18.8897	18.4572	20.0191	19.5789	18.7758	NaN	19.8724
Q9Z2G9	Htatip2	Oxidoreductase HTATIP2	Htatip2	Htatip2	0.480375	1.16767	0.13114	2.07355	0.0511816	1.32921	1.74582				4	7	19.7866	19.3062	19.6151	19.3352	0.483928	0.296358	0.0244574	0.0153504	19.8089	19.3332	18.9285	19.3477	18.9674	19.4225	19.3352	20.494	NaN	NaN	19.6875	19.5426	NaN	19.4222
Q9Z2T6	Krt85	Keratin, type II cuticular Hb5	Krt85	Krt85	2.03527	0	0.997951	0	0.236744	1.86108	2.0618				1	6	22.0258	19.9905	22.0258	19.9135	NaN	1.2788	NaN	0.0639702	20.6974	20.654	21.8822	NaN	19.173	18.7344	18.8022	NaN	NaN	NaN	NaN	NaN	22.0258	NaN
Q9Z2V5	Hdac6	Histone deacetylase 6	Hdac6	Hdac6	-1.2518	0	1	0	0.174864	1.46439	1.81416				1	5	16.2141	17.4659	16.2141	17.2939	NaN	0.403533	NaN	0.0231041	17.118	NaN	17.1773	NaN	18.083	17.6573	17.2939	16.2141	NaN	NaN	NaN	NaN	NaN	NaN
[truncated: 18 more columns]

## Sheet: 02_2wAnova-signifiant only
Protein.Group	Genes	First.Protein.Description	Gene	FC (lg2) DSS+MNP vs DSS	(-)log ANOVA p value DSS+MNP vs DSS	ANOVA q-value DSS+MNP vs DSS	T-test statistic (rank) DSS+MNP vs DSS	(-)log Two-way ANOVA p value MNP-noMNP	(-)log Two-way ANOVA p value Colitis-noColitis	(-)log Two-way ANOVA p value Interaction	Valid values DSS+MNP	Valid values DSS	Mean DSS+MNP	Mean DSS	Median DSS+MNP	Median DSS	stdev DSS+MNP	stdev DSS	Coefficient of variation DSS+MNP	Coefficient of variation DSS
P01869	Ighg1	Ig gamma-1 chain C region, membrane-bound form	Ighg1	2.20026	1.78184	0.0644242	3.02134	0.486579	0.179138	2.29144	5	5	19.9557	17.7554	20.342	17.5515	0.969327	1.30846	0.048574	0.0736935
Q9NYQ2	Hao2	Hydroxyacid oxidase 2	Hao2	2.06442	1.4045	0.0978537	2.52709	1.05005	1.9781	1.69924	3	6	21.5318	19.4674	21.3881	19.8999	0.524291	1.32613	0.0243496	0.0681206
P31809	Ceacam1	Carcinoembryonic antigen-related cell adhesion molecule 1	Ceacam1	2.02481	2.36415	0.0491111	3.66909	2.71576	2.62349	1.92099	5	7	21.1129	19.0881	21.4568	18.9981	0.965827	0.926575	0.0457458	0.048542
Q9QWI6	Srcin1	SRC kinase signaling inhibitor 1	Srcin1	1.91797	1.44892	0.092177	2.42803	0.681041	0.256507	1.56857	6	6	21.986	20.068	21.7868	19.5409	1.46273	1.26662	0.0665302	0.0631162
P26350	Ptma	Prothymosin alpha	Ptma	1.64829	2.17654	0.050125	3.27351	2.13536	0.146041	1.36712	7	7	23.3586	21.7103	23.6029	21.5874	1.17018	0.636723	0.0500964	0.0293282
F2Z3U3	Raph1	Ras association (RalGDS/AF-6) and pleckstrin homology domains 1	Raph1	1.57005	1.60897	0.0774667	2.69472	0.562283	0.236304	1.83446	5	6	23.7458	22.1758	24.0792	22.2086	1.35496	0.444698	0.0570609	0.0200533
Q9DB42	Znf593	Zinc finger protein 593	Znf593	1.47382	1.5699	0.0806737	2.91168	0.827158	0.129005	1.75147	2	6	20.1072	18.6334	20.1072	18.859	0.686176	0.605818	0.0341259	0.0325125
P15535	B4galt1	Beta-1,4-galactosyltransferase 1	B4galt1	1.43446	1.53436	0.086	2.73287	1.25911	0.0150817	1.72976	2	7	18.5511	17.1167	18.5511	17.0789	0.874621	0.610337	0.0471464	0.0356574
Q1RME4	Gm1123	CAR-like soluble protein	Gm1123	1.32337	2.23274	0.0517037	3.58862	0.137459	4.23668	4.51864	6	5	20.979	19.6556	21.1445	19.5434	0.708641	0.454718	0.0337786	0.0231342
P16014	Chgb	Secretogranin-1	Chgb	1.23295	2.80899	0.042	4.17391	1.06221	0.891444	2.2741	6	7	20.7188	19.4859	20.7889	19.3367	0.529997	0.531742	0.0255805	0.0272886
Q9D7P9	Serpinb12	Serpin B12	Serpinb12	1.22842	2.09816	0.0513846	3.66878	1.33354	0.840418	1.31956	3	6	19.5867	18.3583	19.6835	18.5671	0.41833	0.493873	0.0213578	0.0269019
P26339	Chga	Chromogranin-A	Chga	1.17183	2.15975	0.0490588	3.25265	1.32745	0.461948	2.1857	7	7	21.7322	20.5604	21.9348	20.5615	0.793645	0.527905	0.0365193	0.0256758
Q8BYU6	Tor1aip2	Torsin-1A-interacting protein 2	Tor1aip2	1.16809	2.84735	0.052	4.22633	3.55594	0.599275	1.46859	6	7	20.5791	19.411	20.6088	19.4503	0.643345	0.327933	0.031262	0.0168942
P01631	-	Ig kappa chain V-II region 26-10	KV2A7	1.1107	1.67109	0.0735802	2.68215	0.168949	0.162769	1.94504	6	7	21.1384	20.0277	21.3228	20.0057	0.841107	0.652813	0.0397905	0.0325955
P70670	Naca	Nascent polypeptide-associated complex subunit alpha, muscle-specific form	Naca	1.068	1.40863	0.0975082	2.37374	0.304237	0.908321	1.79452	5	7	22.2404	21.1724	22.3692	21.0467	0.83872	0.717681	0.0377115	0.0338969
Q6IFX2	Krt42	Keratin, type I cytoskeletal 42	Krt42	1.04929	1.38973	0.0974173	2.29227	0.174277	0.221418	1.73305	7	7	23.3863	22.337	23.0181	22.3844	1.1019	0.502555	0.0471172	0.0224988
Q62241	Snrpc	U1 small nuclear ribonucleoprotein C	Snrpc	1.04914	1.38437	0.0969922	2.31041	0.195098	1.68602	2.48877	6	7	21.8153	20.7662	21.875	20.6797	0.798986	0.830272	0.0366249	0.0399819
P01723;P01727	-	Ig lambda-1 chain V region	LV1A	1.0487	1.33808	0.103735	2.24973	0.940673	0.310666	4.64803	6	7	20.5109	19.4622	20.5585	19.402	0.897456	0.784755	0.0437551	0.040322
Q8BP01	Vmac	Vimentin-type intermediate filament-associated coiled-coil protein	Vmac	1.04548	2.2486	0.0512	3.74785	0.760867	0.185438	1.37689	4	6	20.605	19.5596	20.5398	19.6341	0.567544	0.324886	0.0275439	0.0166101
Q811U4	Mfn1	Mitofusin-1	Mfn1	0.980883	2.02815	0.0527442	3.54772	1.15248	0.934404	1.5098	3	6	20.0193	19.0384	20.0001	19.0189	0.514469	0.32889	0.0256987	0.017275
Q91VW3	Sh3bgrl3	SH3 domain-binding glutamic acid-rich-like protein 3	Sh3bgrl3	0.9549	1.45881	0.0911786	2.37991	0.421068	1.72668	1.91965	7	7	24.9151	23.9602	25.0761	23.8443	0.876072	0.599515	0.0351623	0.0250213
P97352	S100a13	Protein S100-A13	S100a13	0.942822	1.4303	0.0944274	2.37037	0.00226429	0.176926	3.50024	6	7	22.7762	21.8333	22.9544	21.7091	0.901197	0.510176	0.0395676	0.0233669
Q08652	Rbp2	Retinol-binding protein 2	Rbp2	0.85975	1.3205	0.108204	2.22663	0.0825259	1.08191	2.05236	6	7	21.0705	20.2107	21.0001	20.328	0.74741	0.646185	0.0354719	0.0319724
P46414	Cdkn1b	Cyclin-dependent kinase inhibitor 1B	Cdkn1b	0.854562	2.18159	0.0512258	3.34091	0.26141	0.486151	2.13119	6	7	20.2133	19.3588	20.2587	19.2584	0.409194	0.497993	0.0202438	0.0257244
Q61133	Gstt2	Glutathione S-transferase theta-2	Gstt2	0.827428	1.31216	0.109855	2.24324	0.911445	2.48504	1.63077	5	7	20.5117	19.6843	20.5679	19.7207	0.524553	0.691326	0.0255734	0.0351207
O35887	Calu	Calumenin	Calu	0.795571	1.786	0.0651692	2.78922	0.959252	0.157275	1.41432	7	7	23.2967	22.5011	23.1974	22.3952	0.645039	0.391689	0.027688	0.0174075
Q8VCZ6	Sgsm3	Small G protein signaling modulator 3	Sgsm3	0.772625	1.34658	0.1024	2.32627	1.04442	1.91936	1.35238	4	7	19.5034	18.7308	19.5399	18.8039	0.662582	0.449085	0.0339726	0.0239758
Q9CY45	Eef1akmt1	EEF1A lysine methyltransferase 1	Eef1akmt1	0.704335	1.55184	0.0830103	2.61446	0.169722	0.677249	2.03739	4	7	19.6799	18.9756	19.9647	19.0129	0.615229	0.296406	0.0312617	0.0156204
P68254	Ywhaq	14-3-3 protein theta	Ywhaq	0.679521	1.67456	0.074	2.68662	0.100811	0.250178	1.54736	6	7	22.2175	21.538	22.239	21.5763	0.313183	0.54514	0.0140962	0.0253106
Q9CQK7	Rwdd1	RWD domain-containing protein 1	Rwdd1	0.6569	1.36692	0.0980597	2.40319	0.027687	0.858341	1.38936	3	7	18.9827	18.3258	18.9056	18.522	0.263354	0.431381	0.0138734	0.0235395
P63254	Crip1	Cysteine-rich protein 1	Crip1	0.619971	1.85534	0.0632281	2.87526	0.21394	3.61907	2.36448	7	7	25.772	25.1521	25.8711	25.2543	0.423378	0.382365	0.0164278	0.0152021
P29391	Ftl1	Ferritin light chain 1	Ftl1	0.611943	2.17201	0.0490909	3.26788	0.857363	0.630101	1.98428	7	7	23.9458	23.3338	23.7542	23.3465	0.376614	0.32191	0.0157278	0.0137959
Q8CDN6	Txnl1	Thioredoxin-like protein 1	Txnl1	0.497595	2.39994	0.0489412	3.62641	1.45184	0.573496	1.51273	6	7	21.7801	21.2825	21.6848	21.1896	0.299708	0.191479	0.0137607	0.00899703
Q8VEK3	Hnrnpu	Heterogeneous nuclear ribonucleoprotein U	Hnrnpu	0.262643	1.77653	0.0639403	2.77746	0.315891	1.60014	1.60659	7	7	24.1108	23.8482	24.0916	23.8723	0.182889	0.170721	0.00758534	0.00715867
Protein.Group	Genes	First.Protein.Description	Gene	FC (lg2) DSS+MNP vs DSS	(-)log ANOVA p value DSS+MNP vs DSS	ANOVA q-value DSS+MNP vs DSS	T-test statistic (rank) DSS+MNP vs DSS	(-)log Two-way ANOVA p value MNP-noMNP	(-)log Two-way ANOVA p value Colitis-noColitis	(-)log Two-way ANOVA p value Interaction	Valid values DSS+MNP	Valid values DSS	Mean DSS+MNP	Mean DSS	Median DSS+MNP	Median DSS	stdev DSS+MNP	stdev DSS	Coefficient of variation DSS+MNP	Coefficient of variation DSS
Q8R429	Atp2a1	Sarcoplasmic/endoplasmic reticulum calcium ATPase 1	Atp2a1	-2.42004	2.2827	0.0502609	-3.55603	0.491662	2.47424	2.24494	5	7	21.6373	24.0573	21.324	24.4796	0.887291	1.31397	0.0410076	0.0546184
D3YU50	Mybpc1	Myosin-binding protein C, slow-type	Mybpc1	-2.24065	2.64321	0.056	-4.06344	1.05595	2.47513	2.16777	5	7	19.8212	22.0619	19.9036	22.186	0.999777	0.900947	0.0504397	0.0408373
P82350	Sgca	Alpha-sarcoglycan	Sgca	-2.2173	1.94829	0.05496	-3.60751	0.191691	0.848312	1.81804	2	6	17.3866	19.6039	17.3866	19.7183	0.323218	0.811851	0.0185901	0.0414128
Q9QZ47	Tnnt3	Troponin T, fast skeletal muscle	Tnnt3	-2.15497	1.90069	0.0586415	-2.97779	1.28631	2.04953	1.69965	6	7	21.3509	23.5059	20.8264	24.2361	1.39446	1.2172	0.0653116	0.0517828
Q5SX40	Myh1	Myosin-1	Myh1	-2.08526	2.45458	0.0656	-3.62057	1.37866	3.42754	2.20283	7	7	24.6436	26.7288	24.769	26.9639	1.25118	0.8698	0.0507711	0.0325417
P04247	Mb	Myoglobin	Mb	-1.98007	1.63648	0.0774118	-2.67995	0.323002	2.93295	2.11765	5	7	19.8896	21.8697	19.8326	22.4935	0.454129	1.58624	0.0228325	0.0725317
Q8BYN3	Itpk1	Inositol-tetrakisphosphate 1-kinase	Itpk1	-1.9298	2.08987	0.0494634	-3.65437	0.534209	1.10194	2.55445	3	6	17.5254	19.4552	17.1294	19.2505	0.771154	0.736859	0.0440021	0.0378746
Q8VED5	Krt79	Keratin, type II cytoskeletal 79	Krt79	-1.88275	2.2774	0.0483333	-3.98655	0.440074	1.02065	3.13363	3	6	21.8976	23.7803	21.6563	23.6999	0.561244	0.706065	0.0256304	0.0296911
P97457	Mylpf	Myosin regulatory light chain 2, skeletal muscle isoform	Mylpf	-1.87986	2.00941	0.0527111	-3.11795	0.946005	2.45556	1.77249	6	7	23.472	25.3518	23.5355	25.5212	1.08585	1.08191	0.0462614	0.042676
Q7TNG8	Ldhd	Probable D-lactate dehydrogenase, mitochondrial	Ldhd	-1.85929	2.10015	0.0527368	-4.26977	1.22027	0.631388	2.17323	2	5	16.5669	18.4261	16.5669	18.2119	0.584707	0.503128	0.0352938	0.0273051
P13542	Myh8	Myosin-8	Myh8	-1.74824	2.41585	0.0512	-3.57198	1.22145	4.11762	2.18039	7	7	23.6052	25.3535	23.6655	25.4655	1.02013	0.79758	0.0432164	0.0314584
A2ASS6	Ttn	Titin	Ttn	-1.74059	2.22347	0.0501429	-3.33185	0.937565	2.68359	1.93468	7	7	21.1248	22.8653	20.6792	23.3158	0.939408	1.01385	0.0444695	0.0443399
Q6PIE5	Atp1a2	Sodium/potassium-transporting ATPase subunit alpha-2	Atp1a2	-1.73147	2.30709	0.0487273	-3.5898	1.14741	1.27469	1.73333	5	7	19.0084	20.7398	19.3928	20.7824	0.993532	0.687628	0.0522682	0.0331549
Q80Y17	Llgl1	Lethal(2) giant larvae protein homolog 1	Llgl1	-1.70653	1.8402	0.0639322	-3.66971	1.04313	0.144415	1.563	2	5	17.0714	18.778	17.0714	18.7362	0.617092	0.539415	0.0361476	0.0287259
O35678	Mgll	Monoglyceride lipase	Mgll	-1.67347	2.63052	0.0505	-4.04524	1.42697	0.0458033	2.93264	5	7	20.1798	21.8533	20.2477	22.1031	0.61661	0.760561	0.0305558	0.0348031
Q9D6J1	Cers4	Ceramide synthase 4	Cers4	-1.66307	2.56775	0.0511111	-4.90196	1.5401	0.653265	2.93562	2	6	18.4035	20.0666	18.4035	20.1086	0.149765	0.450218	0.00813785	0.0224362
Q7TQ48	Srl	Sarcalumenin	Srl	-1.5912	1.5182	0.0864554	-2.62688	0.153586	1.67188	1.43562	3	7	19.4049	20.9961	19.2376	21.1759	0.767254	0.911671	0.0395392	0.043421
P26516	Psmd7	26S proteasome non-ATPase regulatory subunit 7	Psmd7	-1.58899	2.20321	0.0513333	-3.67511	0.405249	0.464062	1.7324	3	7	18.6983	20.2873	18.5325	20.3959	0.378528	0.689689	0.020244	0.0339962
Q91VE0	Slc27a4	Long-chain fatty acid transport protein 4	Slc27a4	-1.58488	2.42921	0.0569231	-3.76001	1.01557	0.065897	3.14183	5	7	18.7508	20.3357	19.1355	20.4314	0.834534	0.631964	0.0445065	0.0310766
Q8VCH6	Dhcr24	Delta(24)-sterol reductase	Dhcr24	-1.57189	1.37265	0.0974737	-2.47695	0.149365	1.46773	2.45287	2	7	18.5008	20.0727	18.5008	20.259	0.685186	0.807849	0.0370355	0.0402462
P47857	Pfkm	ATP-dependent 6-phosphofructokinase, muscle type	Pfkm	-1.50868	2.10917	0.052973	-3.24694	0.663189	2.28199	1.91773	6	7	19.8432	21.3519	19.7586	21.1638	0.724369	0.917342	0.0365046	0.042963
Q9QZW0	Atp11c	Phospholipid-transporting ATPase 11C	Atp11c	-1.50753	2.8457	0.0424	-7.84423	1.51603	1.32235	3.24225	2	4	15.7737	17.2812	15.7737	17.2669	0.228537	0.219661	0.0144885	0.012711
Q91XE9	Creb3l3	Cyclic AMP-responsive element-binding protein 3-like protein 3	Creb3l3	-1.50341	1.30953	0.110014	-2.58672	0.451331	0.651814	1.34721	2	5	18.1179	19.6214	18.1179	19.497	0.724148	0.687104	0.0399685	0.0350182
Q99L88	Sntb1	Beta-1-syntrophin	Sntb1	-1.43353	2.31911	0.0497143	-4.06221	0.115517	2.47966	2.83559	3	6	17.2269	18.6604	16.9744	18.6128	0.658046	0.418912	0.0381987	0.0224492
Q9CWP6	Mospd2	Motile sperm domain-containing protein 2	Mospd2	-1.42606	1.74492	0.0658889	-2.96558	0.304418	0.0844255	1.7252	3	7	16.7858	18.2119	16.7168	18.2461	0.279463	0.788306	0.0166488	0.0432853
Q921G6	Lrch4	Leucine-rich repeat and calponin homology domain-containing protein 4	Lrch4	-1.37106	1.91744	0.0576923	-3.84243	0.728861	1.21864	2.00325	2	5	15.1782	16.5493	15.1782	16.5872	0.0564269	0.475986	0.00371763	0.0287618
Q80WG5	Lrrc8a	Volume-regulated anion channel subunit LRRC8A	Lrrc8a	-1.36254	1.44706	0.0919649	-2.52155	0.435473	0.59261	1.36566	3	7	16.8572	18.2198	16.806	18.6405	0.314991	0.885715	0.0186858	0.0486128
Q99J56	Derl1	Derlin-1	Derl1	-1.35044	1.43648	0.0931379	-2.45255	0.069223	0.303869	1.79735	4	7	18.996	20.3465	18.5969	20.2745	1.16529	0.691867	0.0613436	0.0340042
Q9Z1E4	Gys1	Glycogen [starch] synthase, muscle	Gys1	-1.32605	2.43186	0.0669091	-3.66848	0.330971	1.19188	1.99586	6	7	19.4262	20.7522	19.3286	20.8604	0.661776	0.639498	0.0340662	0.0308159
Q6Y685	Tacc1	Transforming acidic coiled-coil-containing protein 1	Tacc1	-1.31472	1.42028	0.0944667	-2.65067	1.33581	0.589161	1.66467	3	5	17.4236	18.7383	17.0195	18.8237	0.856964	0.569834	0.0491841	0.0304101
Q9ER41	Tor1b	Torsin-1B	Tor1b	-1.30878	1.75929	0.063831	-3.25274	1.77267	0.213485	1.85023	3	5	17.515	18.8238	17.418	18.8344	0.82081	0.344189	0.0468632	0.0182848
Q9CXE7	Tmed5	Transmembrane emp24 domain-containing protein 5	Tmed5	-1.30248	2.23741	0.0527692	-3.49352	1.32877	0.687206	1.35103	5	7	19.1581	20.4606	19.456	20.5583	0.752802	0.545789	0.0392942	0.0266752
O88587	Comt	Catechol O-methyltransferase	Comt	-1.25673	1.58649	0.0784681	-2.61288	0.132143	0.313727	1.56605	5	7	19.9629	21.2196	20.2974	21.4365	0.92499	0.744414	0.0463355	0.0350814
P82349	Sgcb	Beta-sarcoglycan	Sgcb	-1.25187	2.1419	0.0505143	-3.74527	0.643216	0.988459	2.31477	3	6	17.9092	19.161	17.9253	19.1238	0.393349	0.500939	0.0219636	0.0261436
O54865	Gucy1b1	Guanylate cyclase soluble subunit beta-1	Gucy1b1	-1.24972	2.97112	0.068	-4.73342	0.0406057	1.19617	2.67542	4	7	17.8884	19.1381	17.7843	19.1718	0.556173	0.333899	0.0310912	0.0174468
Q9QXY9	Pex3	Peroxisomal biogenesis factor 3	Pex3	-1.21604	1.50506	0.0846792	-2.50355	0.214524	2.66724	2.87639	5	7	18.3712	19.5872	18.6429	19.6886	1.09869	0.584936	0.0598048	0.0298631
Q8K2T8	Paf1	RNA polymerase II-associated factor 1 homolog	Paf1	-1.21465	1.50833	0.0851429	-2.80346	1.33558	0.565786	1.40536	3	5	16.8496	18.0642	17.2657	18.1402	0.942796	0.28903	0.0559537	0.0160001
B2RXR6	Ankrd44	Serine/threonine-protein phosphatase 6 regulatory ankyrin repeat subunit B	Ankrd44	-1.21114	2.90151	0.0613333	-5.70495	0.547705	0.383404	2.04376	3	5	16.7126	17.9237	16.8074	17.9646	0.292364	0.289863	0.0174936	0.016172
Q9R061	Nubp2	Cytosolic Fe-S cluster assembly factor NUBP2	Nubp2	-1.19088	2.07724	0.0492381	-3.85913	0.55464	1.17369	2.88787	2	6	18.1827	19.3736	18.1827	19.4425	0.192544	0.404961	0.0105894	0.0209027
Q9DCX1	Mad2l1bp	MAD2L1-binding protein	Mad2l1bp	-1.16522	1.82075	0.0631613	-3.3664	0.56864	0.440507	1.79111	2	6	15.9528	17.118	15.9528	17.1905	0.4995	0.407128	0.0313111	0.0237836
Q3UV70	Pdp1	[Pyruvate dehydrogenase [acetyl-transferring]]-phosphatase 1, mitochondrial	Pdp1	-1.14359	2.35239	0.048	-3.76621	0.701733	3.02077	2.3055	5	6	17.5555	18.6991	17.7779	18.6046	0.695919	0.255292	0.0396411	0.0136527
Q8R054	Srpx2	Sushi repeat-containing protein SRPX2	Srpx2	-1.13505	1.66991	0.0729756	-3.30388	0.80331	1.11504	1.50187	2	5	15.7828	16.9179	15.7828	17.1559	0.200748	0.447982	0.0127194	0.0264797
Q810A3	Ttc9c	Tetratricopeptide repeat protein 9C	Ttc9c	-1.12097	1.95142	0.0557551	-3.28025	0.331272	0.909025	1.60217	4	6	16.9445	18.0655	16.6989	18.0057	0.627721	0.460461	0.0370457	0.0254884
Q6NVF0	Ocrl	Inositol polyphosphate 5-phosphatase OCRL-1	Ocrl	-1.06455	2.42501	0.0537143	-4.58309	0.196195	0.315357	1.67835	2	6	16.803	17.8675	16.803	17.7986	0.164756	0.302797	0.00980514	0.0169468
Q8BIW1	Prune1	Exopolyphosphatase PRUNE1	Prune1	-1.05751	2.01524	0.0531818	-3.37905	0.171868	1.11881	2.30583	3	7	17.8083	18.8658	18.2344	18.8799	0.84049	0.196905	0.0471965	0.0104371
O70583	Mid1	E3 ubiquitin-protein ligase Midline-1	Mid1	-1.05528	1.46297	0.0907027	-2.88373	0.475705	0.291016	1.94139	2	5	16.8601	17.9154	16.8601	18.0896	0.558332	0.401495	0.0331156	0.0224106
B2RXC2	Itpkb	Kinase	Itpkb	-1.04108	2.09441	0.0502	-3.50278	1.19221	1.33438	2.59148	4	6	17.9426	18.9836	17.9306	19.0112	0.677587	0.252472	0.0377642	0.0132995
Q9Z1W9	Stk39	STE20/SPS1-related proline-alanine-rich protein kinase	Stk39	-1.0349	2.20675	0.0528276	-3.68077	0.109322	1.26719	1.85955	3	7	18.7907	19.8256	18.8645	19.874	0.43744	0.396941	0.0232795	0.0200216
F8VPN4	Agl	Amylo-1,6-glucosidase, 4-alpha-glucanotransferase	Agl	-0.997057	1.53359	0.0852929	-2.47416	0.689284	2.50422	1.51711	7	7	20.7579	21.755	21.0398	21.7305	0.8613	0.628454	0.0414926	0.0288878
Q8CIZ8	Vwf	von Willebrand factor	Vwf	-0.938094	1.38315	0.0970769	-2.37766	0.959763	1.16356	1.54165	5	6	19.0774	20.0155	19.4166	20.0787	0.922235	0.289416	0.0483417	0.0144596
Q9DB73	Cyb5r1	NADH-cytochrome b5 reductase 1	Cyb5r1	-0.913611	1.39778	0.0982903	-2.39821	0.663328	0.584139	1.48718	4	7	18.5351	19.4487	18.9144	19.443	1.01418	0.199595	0.0547169	0.0102626
Q80W22	Thnsl2	Threonine synthase-like 2	Thnsl2	-0.91215	1.65496	0.0755181	-2.8305	0.790161	2.79534	1.57386	4	6	18.886	19.7982	19.1224	19.7673	0.647937	0.383263	0.0343078	0.0193585
Q64339	Isg15	Ubiquitin-like protein ISG15	Isg15	-0.907367	1.7709	0.0645294	-2.8107	1.50187	4.16728	1.50159	6	7	20.5095	21.4169	20.4458	21.4218	0.775263	0.341208	0.0378001	0.0159317
P70671	Irf3	Interferon regulatory factor 3	Irf3	-0.893795	1.79396	0.0653125	-2.84038	1.36375	1.63464	1.41405	6	7	19.4044	20.2982	19.3297	20.3853	0.82224	0.151996	0.0423738	0.00748813
Q9WUM4	Coro1c	Coronin-1C	Coro1c	-0.868872	1.71616	0.0728219	-2.7024	0.84768	1.32463	1.56985	7	7	21.7441	22.613	22.0935	22.6098	0.812116	0.253159	0.0373487	0.0111953
Q8BFW7	Lpp	Lipoma-preferred partner homolog	Lpp	-0.854671	2.3451	0.046	-3.48345	1.11877	0.434748	2.07377	7	7	22.8356	23.6903	22.8709	23.8514	0.507454	0.404813	0.022222	0.0170877
Q9D0N7	Chaf1b	Chromatin assembly factor 1 subunit B	Chaf1b	-0.844333	2.40054	0.052	-4.21195	1.50715	2.94023	2.31428	3	6	17.4191	18.2634	17.4817	18.2693	0.163792	0.319039	0.00940304	0.0174688
Q63850	Nup62	Nuclear pore glycoprotein p62	Nup62	-0.829275	1.37882	0.0970992	-2.37158	0.0679131	0.0019782	1.41966	4	7	17.8142	18.6435	18.1868	18.5966	0.779988	0.403312	0.0437845	0.0216329
Q9WVL0	Gstz1	Maleylacetoacetate isomerase	Gstz1	-0.825604	1.88424	0.0575714	-3.08404	1.7147	2.69655	1.48551	4	7	19.2616	20.0872	19.2067	19.9595	0.503723	0.383091	0.0261516	0.0190714
P08226	Apoe	Apolipoprotein E	Apoe	-0.795643	1.82155	0.0640656	-2.83336	0.550902	4.14675	1.82896	7	7	21.1077	21.9033	21.0052	21.813	0.6018	0.435693	0.0285109	0.0198916
Q8CI51	Pdlim5	PDZ and LIM domain protein 5	Pdlim5	-0.792614	2.42951	0.0616667	-3.58911	0.750474	1.21695	2.00936	7	7	21.6689	22.4615	21.8509	22.3392	0.474361	0.341128	0.0218913	0.0151872
Q923T9	Camk2g	Calcium/calmodulin-dependent protein kinase type II subunit gamma	Camk2g	-0.786743	1.83375	0.064	-2.8916	0.364102	0.585392	2.64326	6	7	19.7386	20.5253	19.7369	20.7029	0.445388	0.522645	0.0225643	0.0254634
Q9R0E1	Plod3	Procollagen-lysine,2-oxoglutarate 5-dioxygenase 3	Plod3	-0.780829	1.6348	0.0767442	-2.63536	0.745051	4.11464	1.47652	6	7	19.4876	20.2684	19.2805	20.1853	0.591077	0.47836	0.0303309	0.0236012
P08556	Nras	GTPase NRas	Nras	-0.768186	1.69785	0.0706667	-2.89478	0.85142	0.207316	1.52733	3	7	17.5326	18.3008	17.6125	18.2811	0.238413	0.422174	0.0135982	0.0230686
P40336	Vps26a	Vacuolar protein sorting-associated protein 26A	Vps26a	-0.751043	1.59876	0.0776087	-2.68037	0.122259	0.0135769	1.3462	4	7	19.7254	20.4764	20.0525	20.4488	0.696148	0.23972	0.0352919	0.0117071
Q61081	Cdc37	Hsp90 co-chaperone Cdc37	Cdc37	-0.749718	1.70917	0.072	-2.83583	0.244687	1.52779	1.65093	4	7	18.7048	19.4545	18.6758	19.4184	0.633905	0.256804	0.0338899	0.0132002
Q3V1L4	Nt5c2	Cytosolic purine 5'-nucleotidase	Nt5c2	-0.736353	1.96103	0.0565106	-3.19385	0.618753	0.527398	2.87786	4	7	19.0447	19.781	18.9097	19.733	0.393334	0.354401	0.0206532	0.0179162
E9PWR4	Dip2c	Disco-interacting protein 2 homolog C	Dip2c	-0.703467	1.5619	0.0818333	-2.77686	1.05363	0.970763	1.34954	3	6	18.0214	18.7248	17.8559	18.7051	0.504768	0.278889	0.0280094	0.0148941
Q8BU30	Iars	Isoleucine--tRNA ligase, cytoplasmic	Iars	-0.696643	3.37619	0.076	-4.8179	0.584379	0.670138	2.58442	7	7	20.6406	21.3373	20.6678	21.3577	0.366535	0.10957	0.0177579	0.00513513
Q9JM96	Cdc42ep4	Cdc42 effector protein 4	Cdc42ep4	-0.687119	1.95872	0.05575	-3.62756	0.378261	0.792101	5.39429	3	5	17.8783	18.5654	17.9178	18.5523	0.192809	0.286916	0.0107845	0.0154543
Q62351	Tfrc	Transferrin receptor protein 1	Tfrc	-0.653415	1.46511	0.0910182	-2.38786	1.25989	5.77631	1.58215	7	7	20.4312	21.0846	20.4376	21.1944	0.583972	0.427935	0.0285824	0.0202961
Q3UVK0	Ermp1	Endoplasmic reticulum metallopeptidase 1	Ermp1	-0.635207	1.59657	0.0771183	-2.586	0.482954	0.413579	2.02167	6	7	20.0248	20.66	19.9713	20.6817	0.491579	0.394964	0.0245486	0.0191174
Q9CQC7	Ndufb4	NADH dehydrogenase [ubiquinone] 1 beta subcomplex subunit 4	Ndufb4	-0.617857	1.43742	0.0937043	-2.37964	0.280536	3.76922	2.38125	6	7	20.5251	21.143	20.4462	21.2313	0.472749	0.461582	0.0230327	0.0218315
Q9R111	Gda	Guanine deaminase	Gda	-0.615501	1.42382	0.0944874	-2.3356	0.324025	4.91795	2.04285	7	7	20.7886	21.4041	20.7183	21.2602	0.639467	0.277885	0.0307604	0.0129828
P48453	Ppp3cb	Serine/threonine-protein phosphatase 2B catalytic subunit beta isoform	Ppp3cb	-0.614843	1.39306	0.0974286	-2.39159	0.0469962	0.151809	1.65659	4	7	18.901	19.5158	19.0091	19.5023	0.367637	0.429857	0.0194507	0.0220261
P60843	Eif4a1	Eukaryotic initiation factor 4A-I	Eif4a1	-0.611128	1.71005	0.0727027	-2.69479	0.832714	2.58464	1.75351	7	7	24.1227	24.7338	24.2775	24.661	0.581931	0.146163	0.0241238	0.00590946
Q9QXZ0	Macf1	Microtubule-actin cross-linking factor 1	Macf1	-0.599481	1.3974	0.097632	-2.32743	0.194817	1.28052	1.6734	6	7	19.9304	20.5299	20.147	20.577	0.619469	0.270504	0.0310816	0.0131761
Q9CYT6	Cap2	Adenylyl cyclase-associated protein 2	Cap2	-0.587855	1.64473	0.0764762	-2.64816	0.634928	2.82854	1.58239	6	7	20.5678	21.1557	20.4879	21.2441	0.445378	0.355774	0.0216541	0.016817
P62137	Ppp1ca	Serine/threonine-protein phosphatase PP1-alpha catalytic subunit	Ppp1ca	-0.579543	1.70364	0.0706494	-2.68682	0.038659	0.299075	2.18888	7	7	21.543	22.1225	21.6782	22.1088	0.446337	0.355619	0.0207184	0.016075
Q91YH5	Atl3	Atlastin-3	Atl3	-0.5762	1.50881	0.0858077	-2.443	0.00342091	0.0240627	2.70353	7	7	20.3463	20.9225	20.3768	20.9814	0.575556	0.241117	0.028288	0.0115243
P59672	Anks1a	Ankyrin repeat and SAM domain-containing protein 1A	Anks1a	-0.573309	1.42744	0.0941017	-2.49255	0.038379	0.650433	1.46783	4	6	17.3685	17.9418	17.3047	17.8665	0.282158	0.394187	0.0162454	0.0219702
Q9QYR9	Acot2	Acyl-coenzyme A thioesterase 2, mitochondrial	Acot2	-0.568979	1.47743	0.089963	-2.43169	0.326926	0.589938	1.78352	6	7	20.6896	21.2586	20.8271	21.2178	0.563371	0.244528	0.0272296	0.0115025
P29758	Oat	Ornithine aminotransferase, mitochondrial	Oat	-0.564674	1.70661	0.0712632	-2.72792	0.0877013	3.7536	2.71362	6	7	21.9803	22.545	22.0272	22.4946	0.518136	0.173415	0.0235727	0.00769199
Q8C6G8	Wdr26	WD repeat-containing protein 26	Wdr26	-0.563937	1.9336	0.0571765	-3.07943	0.103626	0.341742	2.18395	5	7	18.7475	19.3115	18.8358	19.3193	0.27429	0.335961	0.0146307	0.017397
Q8VEE4	Rpa1	Replication protein A 70 kDa DNA-binding subunit	Rpa1	-0.55371	1.3762	0.0973333	-2.29972	0.352367	0.671393	1.426	6	7	19.0121	19.5658	19.2719	19.5071	0.611123	0.17929	0.0321438	0.00916343
Q7TQE6	Maco1	Macoilin	Maco1	-0.55145	1.6291	0.0755909	-3.56452	1.04432	0.912407	1.5414	2	4	17.9076	18.4591	17.9076	18.3818	0.156765	0.185357	0.00875406	0.0100415
P05202	Got2	Aspartate aminotransferase, mitochondrial	Got2	-0.548986	1.8896	0.0577455	-2.91773	0.662936	1.37542	1.96371	7	7	23.7559	24.3049	23.5975	24.2478	0.435166	0.241756	0.0183182	0.0099468
O08638	Myh11	Myosin-11	Myh11	-0.535314	1.38813	0.0968438	-2.29024	0.730139	1.55729	1.38149	7	7	27.1555	27.6908	27.3926	27.6974	0.535318	0.309623	0.0197131	0.0111814
P11531	Dmd	Dystrophin	Dmd	-0.529929	1.62973	0.0762759	-2.59463	1.23359	2.73352	1.30283	7	7	20.0833	20.6132	20.1078	20.7	0.359614	0.403333	0.0179061	0.0195667
P42227	Stat3	Signal transducer and activator of transcription 3	Stat3	-0.520043	1.62634	0.0752809	-2.59039	0.176577	2.54936	1.64735	7	7	20.5776	21.0976	20.7235	21.1037	0.50056	0.177671	0.0243255	0.00842137
E9Q7E2	Arid2	AT-rich interactive domain-containing protein 2	Arid2	-0.506408	1.41921	0.0940496	-2.79789	2.93818	1.46979	1.64794	3	4	17.0995	17.6059	17.02	17.6578	0.270308	0.211869	0.015808	0.012034
Q11011	Npepps	Puromycin-sensitive aminopeptidase	Npepps	-0.483558	1.76163	0.0644571	-2.75895	0.488831	0.623426	2.17829	7	7	21.4304	21.9139	21.4779	21.9428	0.428622	0.176966	0.0200007	0.00807548
Q9DBL7	Coasy	Bifunctional coenzyme A synthase	Coasy	-0.477643	1.46728	0.0912661	-2.4185	0.0866016	2.02293	1.95707	6	7	19.7726	20.2502	19.7841	20.0803	0.420099	0.289753	0.0212465	0.0143086
Q3THK7	Gmps	GMP synthase [glutamine-hydrolyzing]	Gmps	-0.472645	2.12019	0.0524444	-3.26122	0.0763503	0.197625	2.08052	6	7	20.6927	21.1653	20.6012	21.1563	0.331098	0.181811	0.0160007	0.00859006
Q62167	Ddx3x	ATP-dependent RNA helicase DDX3X	Ddx3x	-0.450114	1.99887	0.0525217	-3.05314	1.94068	2.97402	1.46879	7	7	22.5959	23.046	22.5592	23.0558	0.325653	0.214691	0.0144121	0.00931578
Q9WTI7	Myo1c	Unconventional myosin-Ic	Myo1c	-0.436128	1.51395	0.0855146	-2.44947	1.21777	0.175498	1.41816	7	7	23.0368	23.473	23.2299	23.607	0.377738	0.281473	0.0163972	0.0119914
Q64737	Gart	Trifunctional purine biosynthetic protein adenosine-3	Gart	-0.413943	1.60417	0.0773626	-2.56267	0.029381	0.0224901	2.30114	7	7	20.8489	21.2629	20.688	21.2469	0.33673	0.263158	0.016151	0.0123764
Q61687	Atrx	Transcriptional regulator ATRX	Atrx	-0.403077	1.76951	0.063942	-2.85846	0.0899892	0.160444	1.63645	5	7	18.516	18.9191	18.4753	18.8799	0.341537	0.137461	0.0184455	0.00726575
Q9CR39	Wdr45b	WD repeat domain phosphoinositide-interacting protein 3	Wdr45b	-0.402434	1.6963	0.0700253	-2.89245	0.38367	0.136363	1.9372	4	6	18.1261	18.5286	18.1565	18.5466	0.21516	0.215772	0.0118702	0.0116454
Q8BG32	Psmd11	26S proteasome non-ATPase regulatory subunit 11	Psmd11	-0.398843	1.89644	0.0579259	-2.92621	0.366175	1.83358	1.9604	7	7	22.3369	22.7357	22.4108	22.7372	0.343348	0.110253	0.0153714	0.00484933
Q9R0N0	Galk1	Galactokinase	Galk1	-0.374357	1.4834	0.0897196	-2.41097	0.016426	0.00739266	2.95498	7	7	20.8495	21.2238	20.6621	21.2116	0.387627	0.13606	0.0185917	0.00641073
Q9Z1Z0	Uso1	General vesicular transport factor p115	Uso1	-0.368428	1.51516	0.0861961	-2.45098	0.777277	1.26526	1.38821	7	7	20.8307	21.1991	20.8634	21.1827	0.344363	0.198956	0.0165316	0.00938512
Q61411	Hras	GTPase HRas	Hras	-0.34515	1.53345	0.08444	-3.32365	1.35875	1.91883	3.27022	2	4	17.7434	18.0885	17.7434	18.1107	0.0958129	0.126932	0.00539993	0.00701728
Q6NZJ6	Eif4g1	Eukaryotic translation initiation factor 4 gamma 1	Eif4g1	-0.3127	1.85165	0.0633793	-2.87069	0.547238	3.80353	2.51182	7	7	22.2747	22.5874	22.2123	22.5722	0.264196	0.115148	0.0118608	0.00509789
P26450	Pik3r1	Phosphatidylinositol 3-kinase regulatory subunit alpha	Pik3r1	-0.207111	1.80163	0.0652698	-2.9666	0.568557	0.859032	1.5949	4	7	18.9993	19.2064	19.0115	19.2164	0.11013	0.112007	0.00579654	0.00583176

## Sheet: 03_Enrichments-WG output
CellType
geneSet		enrichmentScore	normalizedEnrichmentScore	pValue	FDR	size	link	plotPath	leadingEdgeNum	leadingEdgeId	userId
Dendritic cell	2.34413	0.685538	2.34413	0	0.00620023	11	https://pubmed.ncbi.nlm.nih.gov/29474909/	./Project_wg_result1748362849_GSEA/Dendritic cell.png	8	14325;12925;73723;12313;14998;64138;13032;67963	Calm1;Crip1;Ctsc;Ctsz;Ftl1;H2-DMa;Npc2;Sh3bgrl3
Myoloid cell	2.37212	0.68627	2.37212	0.00331126	0.00744028	11	https://pubmed.ncbi.nlm.nih.gov/29474909/	./Project_wg_result1748362849_GSEA/Myoloid cell.png	8	14325;12925;73723;12313;16432;14998;13032;67963	Calm1;Crip1;Ctsc;Ftl1;H2-DMa;Itm2b;Npc2;Sh3bgrl3
Microglial	1.83592	0.643032	1.83592	0.0221519	0.0823391	7	https://pubmed.ncbi.nlm.nih.gov/29474909/	./Project_wg_result1748362849_GSEA/Microglial.png	7	14325;16432;64138;13033;19261;67865;270084	Ctsd;Ctsz;Ftl1;Itm2b;Lpcat2;Rgs10;Sirpa
Macrophage	1.79069	0.449017	1.79069	0.0131579	0.0913501	18	https://pubmed.ncbi.nlm.nih.gov/29474909/	./Project_wg_result1748362849_GSEA/Macrophage.png	9	14325;12925;73723;12313;16432;14998;64138;13032;67963	Calm1;Crip1;Ctsc;Ctsz;Ftl1;H2-DMa;Itm2b;Npc2;Sh3bgrl3
Endocrine cell	1.8861	0.787084	1.8861	0	0.107471	5	https://pubmed.ncbi.nlm.nih.gov/29474909/	./Project_wg_result1748362849_GSEA/Endocrine cell.png	4	12653;12652;12313;231887	Calm1;Chga;Chgb;Pdap1
Enterocyte	1.62354	0.723639	1.62354	0.0438144	0.127932	4	https://pubmed.ncbi.nlm.nih.gov/29474909/	./Project_wg_result1748362849_GSEA/Enterocyte.png	3	12925;19660;75600	Calml4;Crip1;Rbp2
Neutrophil	1.63988	0.389286	1.63988	0.0218341	0.130092	20	https://pubmed.ncbi.nlm.nih.gov/29474909/	./Project_wg_result1748362849_GSEA/Neutrophil.png	10	19231;73723;17938;12313;16432;53379;20005;67771;66437;22320	Arpc5;Calm1;Fis1;Hnrnpa2b1;Itm2b;Naca;Ptma;Rpl9;Sh3bgrl3;Vamp8
Mesenchymal stem cell		0.731414	1.64082	0.026455	0.142605	4	https://pubmed.ncbi.nlm.nih.gov/29474909/	./Project_wg_result1748362849_GSEA/Mesenchymal stem cell.png	3	66094;231887;21371	Lsm7;Pdap1;Tbca
Cumulus cell	1.61968	0.751626	1.61968	0.0458015	0.119998	4	https://pubmed.ncbi.nlm.nih.gov/29474909/	./Project_wg_result1748362849_GSEA/Cumulus cell.png	3	22630;20005;21371	Rpl9;Tbca;Ywhaq
Female fetal gonad cell		0.717617	1.88535	0.00290698	0.0806031	6	https://pubmed.ncbi.nlm.nih.gov/29474909/	./Project_wg_result1748362849_GSEA/Female fetal gonad cell.png	4	19231;382423;12313;20005	Atxn7l3b;Calm1;Ptma;Rpl9
Oligodendrocyte	0.495647	-0.219728	-0.495647	0.973396	0.984777	6	https://pubmed.ncbi.nlm.nih.gov/29474909/	./Project_wg_result1748362849_GSEA/Oligodendrocyte.png	3	17988;50915;98660	Atp1a2;Grb14;Ndrg1
Cardiocyte	0.621842	-0.253809	-0.621842	0.898792	1	7	https://pubmed.ncbi.nlm.nih.gov/29474909/	./Project_wg_result1748362849_GSEA/Cardiocyte.png	4	56012;51798;17901;17189	Ech1;Mb;Myl1;Pgam2
Adipocyte	0.684738	-0.340262	-0.684738	0.871429	1	4	https://pubmed.ncbi.nlm.nih.gov/29474909/	./Project_wg_result1748362849_GSEA/Adipocyte.png	3	20656;51798;11816	Apoe;Ech1;Sod2
Hepatocyte	0.705082	-0.290282	-0.705082	0.814815	1	7	https://pubmed.ncbi.nlm.nih.gov/29474909/	./Project_wg_result1748362849_GSEA/Hepatocyte.png	3	14635;26912;11816	Apoe;Galk1;Gcat
Endothelial cell	0.788598	-0.271718	-0.788598	0.75766	1	12	https://pubmed.ncbi.nlm.nih.gov/29474909/	./Project_wg_result1748362849_GSEA/Endothelial cell.png	3	100038882;11816;23945	Apoe;Isg15;Mgll
Alveolar type II cell	0.832638	-0.38249	-0.832638	0.714055	1	5	https://pubmed.ncbi.nlm.nih.gov/29474909/	./Project_wg_result1748362849_GSEA/Alveolar type II cell.png	2	18242;11816	Apoe;Oat
Fasciculata cell	0.867031	-0.432289	-0.867031	0.655844	1	4	https://pubmed.ncbi.nlm.nih.gov/29474909/	./Project_wg_result1748362849_GSEA/Fasciculata cell.png	3	58810;13132;13476	Akr1a1;Dab2;Reep5
Astrocyte	1.33234	-0.729243	-1.33234	0.0834725	1	3	https://pubmed.ncbi.nlm.nih.gov/29474909/	./Project_wg_result1748362849_GSEA/Astrocyte.png	2	11816;98660	Apoe;Atp1a2
GOBP
geneSet	description	link	size	overlap	expect	enrichmentRatio	pValue	FDR	overlapId	userId
GO:0050879	multicellular organismal movement	http://amigo.geneontology.org/amigo/term/GO:0050879	55	4	0.37925	10.5471	0.00055015	0.189276	11937;13405;17885;21957	Atp2a1;Tnnt3;Myh8;Dmd
GO:0043605	amide catabolic process	http://amigo.geneontology.org/amigo/term/GO:0043605	25	3	0.172386	17.4028	0.000652678	0.189276	14544;18242;76952	Nt5c2;Gda;Oat
GO:0097009	energy homeostasis	http://amigo.geneontology.org/amigo/term/GO:0097009	81	4	0.558532	7.16163	0.00234297	0.405126	11816;20848;53416;208643	Apoe;Stat3;Stk39;Eif4g1
GO:0009112	nucleobase metabolic process	http://amigo.geneontology.org/amigo/term/GO:0009112	41	3	0.282714	10.6114	0.00279397	0.405126	14450;14544;76952	Nt5c2;Gart;Gda
GO:0072523	purine-containing compound catabolic process	http://amigo.geneontology.org/amigo/term/GO:0072523	149	5	1.02742	4.86654	0.00365005	0.423405	14544;14635;18642;20848;76952	Pfkm;Nt5c2;Stat3;Galk1;Gda
GO:0002209	behavioral defense response	http://amigo.geneontology.org/amigo/term/GO:0002209	51	3	0.351668	8.53076	0.00519476	0.50216	11816;98660;208643	Atp1a2;Apoe;Eif4g1
GO:0030048	actin filament-based movement	http://amigo.geneontology.org/amigo/term/GO:0030048	107	4	0.737814	5.42142	0.0063487	0.526035	11937;17885;17913;98660	Atp2a1;Myh8;Atp1a2;Myo1c
GO:0035966	response to topologically incorrect protein	http://amigo.geneontology.org/amigo/term/GO:0035966	120	4	0.827455	4.8341	0.00944777	0.598543	18708;67819;208677;226090	Ermp1;Pik3r1;Derl1;Creb3l3
GO:0034340	response to type I interferon	http://amigo.geneontology.org/amigo/term/GO:0034340	66	3	0.4551	6.59195	0.0106013	0.598543	12539;54131;100038882	Irf3;Cdc37;Isg15
GO:0046835	carbohydrate phosphorylation	http://amigo.geneontology.org/amigo/term/GO:0046835	24	2	0.165491	12.0852	0.0117561	0.598543	14635;18642	Pfkm;Galk1
PANTHER
description			enrichmentScore	normalizedEnrichmentScore	pValue	FDR	size	geneSet	plotPath	link	leadingEdgeNum	leadingEdgeId	userId
FAS signaling pathway	P00020:FAS signaling pathway	1.45107	0.749625	1.45107	0.0888383	0.39113	3	P00020	./Project_wg_result1748362714_GSEA/P00020.png	http://www.pantherdb.org/pathway/pathwayDiagram.jsp?catAccession=P00020	1	12367	Casp3
Huntington disease	P00029:Huntington disease	1.17821	0.524143	1.17821	0.251269	0.495619	4	P00029	./Project_wg_result1748362714_GSEA/P00029.png	http://www.pantherdb.org/pathway/pathwayDiagram.jsp?catAccession=P00029	3	74325;12367;67771	Arpc5;Casp3;Cltb
Parkinson disease	P00049:Parkinson disease	1.06632	0.435523	1.06632	0.362606	0.468578	5	P00049	./Project_wg_result1748362714_GSEA/P00049.png	http://www.pantherdb.org/pathway/pathwayDiagram.jsp?catAccession=P00049	5	22630;55948;20618;19177;12995	Csnk2a1;Psmb7;Sfn;Sncg;Ywhaq
Interleukin signaling pathway	P00036:Interleukin signaling pathway	0.774234	0.401356	0.774234	0.746959	0.747972	3	P00036	./Project_wg_result1748362714_GSEA/P00036.png	http://www.pantherdb.org/pathway/pathwayDiagram.jsp?catAccession=P00036	1	12576	Cdkn1b
Ras Pathway	P04393:Ras Pathway	1.03539	-0.519749	-1.03539	0.464169	0.668144	4	P04393	./Project_wg_result1748362714_GSEA/P04393.png	http://www.pantherdb.org/pathway/pathwayDiagram.jsp?catAccession=P04393	2	20848;15461	Hras;Stat3
Glycolysis	P00024:Glycolysis	1.12451	-0.558252	-1.12451	0.333333	0.587536	4	P00024	./Project_wg_result1748362714_GSEA/P00024.png	http://www.pantherdb.org/pathway/pathwayDiagram.jsp?catAccession=P00024	4	56012;18641;18648;18642	Pfkl;Pfkm;Pgam1;Pgam2
T cell activation	P00053:T cell activation	1.15934	-0.576932	-1.15934	0.266998	0.567943	4	P00053	./Project_wg_result1748362714_GSEA/P00053.png	http://www.pantherdb.org/pathway/pathwayDiagram.jsp?catAccession=P00053	3	19056;18708;15461	Hras;Pik3r1;Ppp3cb
Angiogenesis	P00005:Angiogenesis	1.17073	-0.507887	-1.17073	0.276973	0.604089	6	P00005	./Project_wg_result1748362714_GSEA/P00005.png	http://www.pantherdb.org/pathway/pathwayDiagram.jsp?catAccession=P00005	4	50915;20848;18708;15461	Grb14;Hras;Pik3r1;Stat3
Cytoskeletal regulation by Rho GTPase	P00016:Cytoskeletal regulation by Rho GTPase	1.22218	-0.605959	-1.22218	0.219662	0.546764	4	P00016	./Project_wg_result1748362714_GSEA/P00016.png	http://www.pantherdb.org/pathway/pathwayDiagram.jsp?catAccession=P00016	2	17885;17879	Myh1;Myh8
De novo purine biosynthesis	P02738:De novo purine biosynthesis	1.22558	-0.564089	-1.22558	0.227656	0.614997	5	P02738	./Project_wg_result1748362714_GSEA/P02738.png	http://www.pantherdb.org/pathway/pathwayDiagram.jsp?catAccession=P02738	4	20133;18103;14450;229363	Gart;Gmps;Nme2;Rrm1
Endothelin signaling pathway	P00019:Endothelin signaling pathway	1.2578	-0.686799	-1.2578	0.180505	0.614481	3	P00019	./Project_wg_result1748362714_GSEA/P00019.png	http://www.pantherdb.org/pathway/pathwayDiagram.jsp?catAccession=P00019	2	18708;54195	Gucy1b1;Pik3r1
Wnt signaling pathway	P00057:Wnt signaling pathway	1.27572	-0.636184	-1.27572	0.175355	0.677465	4	P00057	./Project_wg_result1748362714_GSEA/P00057.png	http://www.pantherdb.org/pathway/pathwayDiagram.jsp?catAccession=P00057	3	19056;17885;17879	Myh1;Myh8;Ppp3cb
Inflammation mediated by chemokine and cytokine signaling pathway	P00031:Inflammation mediated by chemokine and cytokine signaling pathway	1.31915	-0.526028	-1.31915	0.146667	0.66757	8	P00031	./Project_wg_result1748362714_GSEA/P00031.png	http://www.pantherdb.org/pathway/pathwayDiagram.jsp?catAccession=P00031	6	18747;76709;20848;12325;17885;17879	Arpc2;Camk2g;Myh1;Myh8;Prkaca;Stat3
Gonadotropin-releasing hormone receptor pathway	P06664:Gonadotropin-releasing hormone receptor pathway	1.58217	-0.740514	-1.58217	0.0192926	0.365978	5	P06664	./Project_wg_result1748362714_GSEA/P06664.png	http://www.pantherdb.org/pathway/pathwayDiagram.jsp?catAccession=P06664	4	20848;18708;15461;54195	Gucy1b1;Hras;Pik3r1;Stat3
GOBP
description			normalizedEnrichmentScore	enrichmentScore	pValue	FDR	size	plotPath	geneSet	link	leadingEdgeNum	leadingEdgeId	userId
response to acid chemical	GO:0001101:response to acid chemical	1.55932	1.55932	0.529047	0.0449102	1	8	./Project_wg_result1748362117_GSEA/GO_0001101.png	GO:0001101	http://amigo.geneontology.org/amigo/term/GO:0001101	4	12576;12367;54170;19697	Casp3;Cdkn1b;Rela;Rragc
regulation of DNA-binding transcription factor activity	GO:0051090:regulation of DNA-binding transcription factor activity	1.5522	1.5522	0.58658	0.0700809	1	6	./Project_wg_result1748362117_GSEA/GO_0051090.png	GO:0051090	http://amigo.geneontology.org/amigo/term/GO:0051090	5	66521;23991;19697;14489;109552	Cib1;Mtpn;Rela;Rwdd1;Sri
cell recognition	GO:0008037:cell recognition	1.48576	1.48576	0.623928	0.0909091	1	5	./Project_wg_result1748362117_GSEA/GO_0008037.png	GO:0008037	http://amigo.geneontology.org/amigo/term/GO:0008037	4	14595;12367;22334;19261	B4galt1;Casp3;Sirpa;Vdac2
regulation of reproductive process	GO:2000241:regulation of reproductive process	1.45227	1.45227	0.510487	0.0901163	1	7	./Project_wg_result1748362117_GSEA/GO_2000241.png	GO:2000241	http://amigo.geneontology.org/amigo/term/GO:2000241	4	12576;14595;14119;23991	B4galt1;Cdkn1b;Cib1;Fbn2
hematopoietic progenitor cell differentiation	GO:0002244:hematopoietic progenitor cell differentiation	1.42858	1.42858	0.588044	0.109091	1	5	./Project_wg_result1748362117_GSEA/GO_0002244.png	GO:0002244	http://amigo.geneontology.org/amigo/term/GO:0002244	2	71869;66659	Acp6;Serpinb12
organic hydroxy compound transport	GO:0015850:organic hydroxy compound transport	1.36868	1.36868	0.419649	0.130872	1	11	./Project_wg_result1748362117_GSEA/GO_0015850.png	GO:0015850	http://amigo.geneontology.org/amigo/term/GO:0015850	6	26365;12652;11833;100434;67963;20501	Aqp8;Ceacam1;Chga;Npc2;Slc16a1;Slc44a1
mRNA processing	GO:0006397:mRNA processing	1.31945	1.31945	0.327822	0.128205	1	19	./Project_wg_result1748362117_GSEA/GO_0006397.png	GO:0006397	http://amigo.geneontology.org/amigo/term/GO:0006397	10	51810;20630;76479;53379;66094;54196;67302;75956;69241;19656	Hnrnpa2b1;Hnrnpu;Lsm7;Pabpn1;Polr2d;Rbmxl1;Smndc1;Snrpc;Srrm2;Zc3h13
RNA splicing	GO:0008380:RNA splicing		1.26765	0.314361	0.129921	1	17	./Project_wg_result1748362117_GSEA/GO_0008380.png	GO:0008380	http://amigo.geneontology.org/amigo/term/GO:0008380	16	51810;20630;76479;53379;66094;67302;75956;19656;66055;219158;56258;245945;20815;192170;67040;66395	Ahnak;Ccar2;Ddx17;Eif4a3;Hnrnpa2b1;Hnrnph2;Hnrnpu;Lsm7;Rbm47;Rbmxl1;Sf3b6;Smndc1;Snrpc;Srpk1;Srrm2;Zc3h13
protein-containing complex localization	GO:0031503:protein-containing complex localization		0.514074	0.1471	0.986395	0.998611	12	./Project_wg_result1748362117_GSEA/GO_0031503.png	GO:0031503	http://amigo.geneontology.org/amigo/term/GO:0031503	3	51810;13642;64143	Efnb2;Hnrnpu;Ralb
inorganic anion transport	GO:0015698:inorganic anion transport		0.467033	0.199513	1	0.99645	5	./Project_wg_result1748362117_GSEA/GO_0015698.png	GO:0015698	http://amigo.geneontology.org/amigo/term/GO:0015698	5	56857;23844;20535;83704;241296	Clca1;Lrrc8a;Slc12a9;Slc37a2;Slc4a2
negative regulation of locomotion	GO:0040013:negative regulation of locomotion	1.2244	-1.2244	-0.508146	0.201849	0.625641	7	./Project_wg_result1748362117_GSEA/GO_0040013.png	GO:0040013	http://amigo.geneontology.org/amigo/term/GO:0040013	4	20848;23790;77044;11816	Apoe;Arid2;Coro1c;Stat3
muscle cell proliferation	GO:0033002:muscle cell proliferation	1.2376	-1.2376	-0.45724	0.204578	0.61134	9	./Project_wg_result1748362117_GSEA/GO_0033002.png	GO:0033002	http://amigo.geneontology.org/amigo/term/GO:0033002	5	20848;12846;77044;11816;18708	Apoe;Arid2;Comt;Pik3r1;Stat3
positive regulation of cell activation	GO:0050867:positive regulation of cell activation	1.23907	-1.23907	-0.44752	0.219547	0.61479	10	./Project_wg_result1748362117_GSEA/GO_0050867.png	GO:0050867	http://amigo.geneontology.org/amigo/term/GO:0050867	5	20851;22042;77044;320404;320940	Arid2;Atp11c;Itpkb;Stat5b;Tfrc
reactive oxygen species metabolic process	GO:0072593:reactive oxygen species metabolic process	1.24327	-1.24327	-0.518231	0.235294	0.610725	7	./Project_wg_result1748362117_GSEA/GO_0072593.png	GO:0072593	http://amigo.geneontology.org/amigo/term/GO:0072593	3	20848;13405;17189	Dmd;Mb;Stat3
neutral lipid metabolic process	GO:0006638:neutral lipid metabolic process	1.24513	-1.24513	-0.569966	0.203125	0.613166	5	./Project_wg_result1748362117_GSEA/GO_0006638.png	GO:0006638	http://amigo.geneontology.org/amigo/term/GO:0006638	4	100504663;433256;11816;23945	Acsl5;Apoe;Atg14;Mgll
nucleosome organization	GO:0034728:nucleosome organization	1.24545	-1.24545	-0.532082	0.199683	0.619772	6	./Project_wg_result1748362117_GSEA/GO_0034728.png	GO:0034728	http://amigo.geneontology.org/amigo/term/GO:0034728	3	77044;22589;110749	Arid2;Atrx;Chaf1b
regulation of protein-containing complex assembly	GO:0043254:regulation of protein-containing complex assembly	1.24943	-1.24943	-0.385257	0.206667	0.616182	19	./Project_wg_result1748362117_GSEA/GO_0043254.png	GO:0043254	http://amigo.geneontology.org/amigo/term/GO:0043254	9	14544;22042;17913;100038882;11816;208643;13205;229589;56699	Apoe;Cdc42ep4;Ddx3x;Eif4g1;Gda;Isg15;Myo1c;Prune1;Tfrc
forebrain development	GO:0030900:forebrain development	1.24987	-1.24987	-0.429746	0.189445	0.62247	13	./Project_wg_result1748362117_GSEA/GO_0030900.png	GO:0030900	http://amigo.geneontology.org/amigo/term/GO:0030900	6	14450;13405;320165;23790;22589;98660	Atp1a2;Atrx;Coro1c;Dmd;Gart;Tacc1
response to type II interferon	GO:0034341:response to type II interferon	1.25015	-1.25015	-0.493963	0.20092	0.62924	8	./Project_wg_result1748362117_GSEA/GO_0034341.png	GO:0034341	http://amigo.geneontology.org/amigo/term/GO:0034341	4	109168;17913;12539;56699	Atl3;Cdc37;Cdc42ep4;Myo1c
positive regulation of cell cycle	GO:0045787:positive regulation of cell cycle	1.29325	-1.29325	-0.428438	0.164659	0.627474	15	./Project_wg_result1748362117_GSEA/GO_0045787.png	GO:0045787	http://amigo.geneontology.org/amigo/term/GO:0045787	13	13684;15289;215387;20133;99375;20851;227937;18226;54624;22589;208643;13205;66591	Atrx;Cul4a;Ddx3x;Eif4e;Eif4g1;Hmgb1;Mad2l1bp;Ncaph;Nup62;Paf1;Pkp4;Rrm1;Stat5b
description-KEGG		NES [KEGG]	enrichmentScore	normalizedEnrichmentScore	pValue	FDR	size	plotPath	geneSet	link	leadingEdgeNum	leadingEdgeId	userId
Spliceosome	mmu03040:Spliceosome	1.80312	0.648809	1.80312	0.011976	0.356639	7	./Project_wg_result1748363634_GSEA/mmu03040.png	mmu03040	http://www.kegg.jp/kegg-bin/show_pathway?mmu03040+51810+20630+76479+66094	4	51810;20630;76479;66094	Hnrnpu;Lsm7;Smndc1;Snrpc
Lysosome	mmu04142:Lysosome	1.53419	0.532866	1.53419	0.0634441	0.936439	8	./Project_wg_result1748363634_GSEA/mmu04142.png	mmu04142	http://www.kegg.jp/kegg-bin/show_pathway?mmu04142+252903+74325+64138+13032+67963	5	252903;74325;64138;13032;67963	Ap1s3;Cltb;Ctsc;Ctsz;Npc2
Tuberculosis	mmu05152:Tuberculosis	1.39606	0.416417	1.39606	0.110759	1	11	./Project_wg_result1748363634_GSEA/mmu05152.png	mmu05152	http://www.kegg.jp/kegg-bin/show_pathway?mmu05152+75600+12313+14998+19344+12367+19697+18046+13033+12721	9	75600;12313;14998;19344;12367;19697;18046;13033;12721	Calm1;Calml4;Casp3;Coro1a;Ctsd;H2-DMa;Nfyc;Rab5b;Rela
Fluid shear stress and atherosclerosis	mmu05418:Fluid shear stress and atherosclerosis	1.2918	0.495545	1.2918	0.173913	1	6	./Project_wg_result1748363634_GSEA/mmu05418.png	mmu05418	http://www.kegg.jp/kegg-bin/show_pathway?mmu05418+14872+75600+12313+19697	4	14872;75600;12313;19697	Calm1;Calml4;Gstt2;Rela
Pertussis	mmu05133:Pertussis	1.25039	0.515311	1.25039	0.196286	1	5	./Project_wg_result1748363634_GSEA/mmu05133.png	mmu05133	http://www.kegg.jp/kegg-bin/show_pathway?mmu05133+75600+12313+12367+19697	4	75600;12313;12367;19697	Calm1;Calml4;Casp3;Rela
Transcriptional misregulation in cancer	mmu05202:Transcriptional misregulation in cancer	1.13825	0.517027	1.13825	0.260143	1	4	./Project_wg_result1748363634_GSEA/mmu05202.png	mmu05202	http://www.kegg.jp/kegg-bin/show_pathway?mmu05202+12576+19697+268996	3	12576;19697;268996	Cdkn1b;Rela;Ss18
Small cell lung cancer	mmu05222:Small cell lung cancer	1.04904	0.476795	1.04904	0.385604	1	4	./Project_wg_result1748363634_GSEA/mmu05222.png	mmu05222	http://www.kegg.jp/kegg-bin/show_pathway?mmu05222+12576+12367+19697	3	12576;12367;19697	Casp3;Cdkn1b;Rela
N-Glycan biosynthesis	mmu00510:N-Glycan biosynthesis	0.994897	0.516216	0.994897	0.42228	1	3	./Project_wg_result1748363634_GSEA/mmu00510.png	mmu00510	http://www.kegg.jp/kegg-bin/show_pathway?mmu00510+14595	1	14595	B4galt1
Toxoplasmosis	mmu05145:Toxoplasmosis	0.985275	0.449691	0.985275	0.425587	1	4	./Project_wg_result1748363634_GSEA/mmu05145.png	mmu05145	http://www.kegg.jp/kegg-bin/show_pathway?mmu05145+14998+12367+19697	3	14998;12367;19697	Casp3;H2-DMa;Rela
Necroptosis	mmu04217:Necroptosis	0.511554	0.164315	0.511554	0.996711	0.988939	9	./Project_wg_result1748363634_GSEA/mmu04217.png	mmu04217	http://www.kegg.jp/kegg-bin/show_pathway?mmu04217+14325	1	14325	Ftl1
Pancreatic secretion	mmu04972:Pancreatic secretion	1.69723	-0.846574	-1.69723	0.00162602	0.151608	4	./Project_wg_result1748363634_GSEA/mmu04972.png	mmu04972	http://www.kegg.jp/kegg-bin/show_pathway?mmu04972+11937+98660	2	11937;98660	Atp1a2;Atp2a1
Inositol phosphate metabolism	mmu00562:Inositol phosphate metabolism	1.70838	-0.934625	-1.70838	0.00327869	0.152863	3	./Project_wg_result1748363634_GSEA/mmu00562.png	mmu00562	http://www.kegg.jp/kegg-bin/show_pathway?mmu00562+320404+217837+320634	3	320404;217837;320634	Itpk1;Itpkb;Ocrl
Long-term depression	mmu04730:Long-term depression	1.71661	-0.864243	-1.71661	0.0096	0.157194	4	./Project_wg_result1748363634_GSEA/mmu04730.png	mmu04730	http://www.kegg.jp/kegg-bin/show_pathway?mmu04730+18176+15461+54195	3	18176;15461;54195	Gucy1b1;Hras;Nras
Sphingolipid signaling pathway	mmu04071:Sphingolipid signaling pathway	1.75066	-0.730648	-1.75066	0.00745156	0.124345	7	./Project_wg_result1748363634_GSEA/mmu04071.png	mmu04071	http://www.kegg.jp/kegg-bin/show_pathway?mmu04071+18176+18708+15461+67260	4	18176;18708;15461;67260	Cers4;Hras;Nras;Pik3r1
Motor proteins	mmu04814:Motor proteins	1.77232	-0.696078	-1.77232	0.00595238	0.114539	8	./Project_wg_result1748363634_GSEA/mmu04814.png	mmu04814	http://www.kegg.jp/kegg-bin/show_pathway?mmu04814+234663+17901+17880+17913+21957+17907+17885+17879	8	234663;17901;17880;17913;21957;17907;17885;17879	Dync1li2;Myh1;Myh11;Myh8;Myl1;Mylpf;Myo1c;Tnnt3
Arrhythmogenic right ventricular cardiomyopathy	mmu05412:Arrhythmogenic right ventricular cardiomyopathy	1.77366	-0.822384	-1.77366	0.00157978	0.135109	5	./Project_wg_result1748363634_GSEA/mmu05412.png	mmu05412	http://www.kegg.jp/kegg-bin/show_pathway?mmu05412+13405+11937+20391+24051+20649	5	13405;11937;20391;24051;20649	Atp2a1;Dmd;Sgca;Sgcb;Sntb1
Dilated cardiomyopathy	mmu05414:Dilated cardiomyopathy	1.78843	-0.738734	-1.78843	0.0075188	0.143878	7	./Project_wg_result1748363634_GSEA/mmu05414.png	mmu05414	http://www.kegg.jp/kegg-bin/show_pathway?mmu05414+13405+22138+11937+20391+24051+20649	6	13405;22138;11937;20391;24051;20649	Atp2a1;Dmd;Sgca;Sgcb;Sntb1;Ttn
Thyroid hormone signaling pathway	mmu04919:Thyroid hormone signaling pathway	1.81286	-0.72735	-1.81286	0.00144928	0.14377	8	./Project_wg_result1748363634_GSEA/mmu04919.png	mmu04919	http://www.kegg.jp/kegg-bin/show_pathway?mmu04919+18176+18708+18642+15461+11937+98660	6	18176;18708;18642;15461;11937;98660	Atp1a2;Atp2a1;Hras;Nras;Pfkm;Pik3r1
Metabolic pathways	mmu01100:Metabolic pathways	1.86029	-0.431962	-1.86029	0	0.121468	66	./Project_wg_result1748363634_GSEA/mmu01100.png	mmu01100	http://www.kegg.jp/kegg-bin/show_pathway?mmu01100+246277+20133+72039+13433+433256+18641+276846+11947+11754+52064+18648+18103+77974+100678+14544+68194+14635+71743+26912+68636+171210+77559+74754+14450+12846+26433+18242+14719+14874+76952+18642+229363+229589+320404+217837+14936+23945+52815+320634+54195+67260	41	246277;20133;72039;13433;433256;18641;276846;11947;11754;52064;18648;18103;77974;100678;14544;68194;14635;71743;26912;68636;171210;77559;74754;14450;12846;26433;18242;14719;14874;76952;18642;229363;229589;320404;217837;14936;23945;52815;320634;54195;67260	Acot2;Acsl5;Agl;Aoc3;Atp5f1b;Cers4;Coasy;Comt;Coq5;Csad;Dhcr24;Dnmt1;Fahd1;Galk1;Gart;Gcat;Gda;Gmps;Got2;Gstz1;Gucy1b1;Gys1;Itpk1;Itpkb;Ldhd;Mccc1;Mgll;Ndufb4;Nme2;Nt5c2;Oat;Ocrl;Pfkl;Pfkm;Pgam1;Pigs;Plod3;Prune1;Psph;Rdh12;Rrm1
Hypertrophic cardiomyopathy	mmu05410:Hypertrophic cardiomyopathy	1.90238	-0.82439	-1.90238	0.00152207	0.144203	6	./Project_wg_result1748363634_GSEA/mmu05410.png	mmu05410	http://www.kegg.jp/kegg-bin/show_pathway?mmu05410+13405+22138+11937+20391+24051+20649	6	13405;22138;11937;20391;24051;20649	Atp2a1;Dmd;Sgca;Sgcb;Sntb1;Ttn
	Merged Pathways
			enrichmentScore	normalizedEnrichmentScore	pValue	FDR	size	geneSet	plotPath	link	leadingEdgeNum	leadingEdgeId	userId
	P00020:FAS signaling pathway	1.45107	0.749625	1.45107	0.0888383	0.39113	3	P00020	./Project_wg_result1748362714_GSEA/P00020.png	http://www.pantherdb.org/pathway/pathwayDiagram.jsp?catAccession=P00020	1	12367	Casp3
	mmu03040:Spliceosome	1.80312	0.648809	1.80312	0.011976	0.356639	7	./Project_wg_result1748363634_GSEA/mmu03040.png	mmu03040	http://www.kegg.jp/kegg-bin/show_pathway?mmu03040+51810+20630+76479+66094	4	51810;20630;76479;66094	Hnrnpu;Lsm7;Smndc1;Snrpc
	mmu04142:Lysosome	1.53419	0.532866	1.53419	0.0634441	0.936439	8	./Project_wg_result1748363634_GSEA/mmu04142.png	mmu04142	http://www.kegg.jp/kegg-bin/show_pathway?mmu04142+252903+74325+64138+13032+67963	5	252903;74325;64138;13032;67963	Ap1s3;Cltb;Ctsc;Ctsz;Npc2
	mmu05152:Tuberculosis	1.39606	0.416417	1.39606	0.110759	1	11	./Project_wg_result1748363634_GSEA/mmu05152.png	mmu05152	http://www.kegg.jp/kegg-bin/show_pathway?mmu05152+75600+12313+14998+19344+12367+19697+18046+13033+12721	9	75600;12313;14998;19344;12367;19697;18046;13033;12721	Calm1;Calml4;Casp3;Coro1a;Ctsd;H2-DMa;Nfyc;Rab5b;Rela
	mmu05202:Transcriptional misregulation in cancer	1.13825	0.517027	1.13825	0.260143	1	4	./Project_wg_result1748363634_GSEA/mmu05202.png	mmu05202	http://www.kegg.jp/kegg-bin/show_pathway?mmu05202+12576+19697+268996	3	12576;19697;268996	Cdkn1b;Rela;Ss18
	P00049:Parkinson disease	1.06632	0.435523	1.06632	0.362606	0.468578	5	P00049	./Project_wg_result1748362714_GSEA/P00049.png	http://www.pantherdb.org/pathway/pathwayDiagram.jsp?catAccession=P00049	5	22630;55948;20618;19177;12995	Csnk2a1;Psmb7;Sfn;Sncg;Ywhaq
	P00036:Interleukin signaling pathway	0.774234	0.401356	0.774234	0.746959	0.747972	3	P00036	./Project_wg_result1748362714_GSEA/P00036.png	http://www.pantherdb.org/pathway/pathwayDiagram.jsp?catAccession=P00036	1	12576	Cdkn1b
	P04393:Ras Pathway	1.03539	-0.519749	-1.03539	0.464169	0.668144	4	P04393	./Project_wg_result1748362714_GSEA/P04393.png	http://www.pantherdb.org/pathway/pathwayDiagram.jsp?catAccession=P04393	2	20848;15461	Hras;Stat3
	P00024:Glycolysis	1.12451	-0.558252	-1.12451	0.333333	0.587536	4	P00024	./Project_wg_result1748362714_GSEA/P00024.png	http://www.pantherdb.org/pathway/pathwayDiagram.jsp?catAccession=P00024	4	56012;18641;18648;18642	Pfkl;Pfkm;Pgam1;Pgam2
	P00053:T cell activation	1.15934	-0.576932	-1.15934	0.266998	0.567943	4	P00053	./Project_wg_result1748362714_GSEA/P00053.png	http://www.pantherdb.org/pathway/pathwayDiagram.jsp?catAccession=P00053	3	19056;18708;15461	Hras;Pik3r1;Ppp3cb
	P00005:Angiogenesis	1.17073	-0.507887	-1.17073	0.276973	0.604089	6	P00005	./Project_wg_result1748362714_GSEA/P00005.png	http://www.pantherdb.org/pathway/pathwayDiagram.jsp?catAccession=P00005	4	50915;20848;18708;15461	Grb14;Hras;Pik3r1;Stat3
	P00016:Cytoskeletal regulation by Rho GTPase	1.22218	-0.605959	-1.22218	0.219662	0.546764	4	P00016	./Project_wg_result1748362714_GSEA/P00016.png	http://www.pantherdb.org/pathway/pathwayDiagram.jsp?catAccession=P00016	2	17885;17879	Myh1;Myh8
	P02738:De novo purine biosynthesis	1.22558	-0.564089	-1.22558	0.227656	0.614997	5	P02738	./Project_wg_result1748362714_GSEA/P02738.png	http://www.pantherdb.org/pathway/pathwayDiagram.jsp?catAccession=P02738	4	20133;18103;14450;229363	Gart;Gmps;Nme2;Rrm1
	P00057:Wnt signaling pathway	1.27572	-0.636184	-1.27572	0.175355	0.677465	4	P00057	./Project_wg_result1748362714_GSEA/P00057.png	http://www.pantherdb.org/pathway/pathwayDiagram.jsp?catAccession=P00057	3	19056;17885;17879	Myh1;Myh8;Ppp3cb
	P00031:Inflammation mediated by chemokine and cytokine signaling pathway	1.31915	-0.526028	-1.31915	0.146667	0.66757	8	P00031	./Project_wg_result1748362714_GSEA/P00031.png	http://www.pantherdb.org/pathway/pathwayDiagram.jsp?catAccession=P00031	6	18747;76709;20848;12325;17885;17879	Arpc2;Camk2g;Myh1;Myh8;Prkaca;Stat3
	P06664:Gonadotropin-releasing hormone receptor pathway	1.58217	-0.740514	-1.58217	0.0192926	0.365978	5	P06664	./Project_wg_result1748362714_GSEA/P06664.png	http://www.pantherdb.org/pathway/pathwayDiagram.jsp?catAccession=P06664	4	20848;18708;15461;54195	Gucy1b1;Hras;Pik3r1;Stat3
	mmu04071:Sphingolipid signaling pathway	1.75066	-0.730648	-1.75066	0.00745156	0.124345	7	./Project_wg_result1748363634_GSEA/mmu04071.png	mmu04071	http://www.kegg.jp/kegg-bin/show_pathway?mmu04071+18176+18708+15461+67260	4	18176;18708;15461;67260	Cers4;Hras;Nras;Pik3r1
	mmu04814:Motor proteins	1.77232	-0.696078	-1.77232	0.00595238	0.114539	8	./Project_wg_result1748363634_GSEA/mmu04814.png	mmu04814	http://www.kegg.jp/kegg-bin/show_pathway?mmu04814+234663+17901+17880+17913+21957+17907+17885+17879	8	234663;17901;17880;17913;21957;17907;17885;17879	Dync1li2;Myh1;Myh11;Myh8;Myl1;Mylpf;Myo1c;Tnnt3
	mmu01100:Metabolic pathways	1.86029	-0.431962	-1.86029	0	0.121468	66	./Project_wg_result1748363634_GSEA/mmu01100.png	mmu01100	http://www.kegg.jp/kegg-bin/show_pathway?mmu01100+246277+20133+72039+13433+433256+18641+276846+11947+11754+52064+18648+18103+77974+100678+14544+68194+14635+71743+26912+68636+171210+77559+74754+14450+12846+26433+18242+14719+14874+76952+18642+229363+229589+320404+217837+14936+23945+52815+320634+54195+67260	41	246277;20133;72039;13433;433256;18641;276846;11947;11754;52064;18648;18103;77974;100678;14544;68194;14635;71743;26912;68636;171210;77559;74754;14450;12846;26433;18242;14719;14874;76952;18642;229363;229589;320404;217837;14936;23945;52815;320634;54195;67260	Acot2;Acsl5;Agl;Aoc3;Atp5f1b;Cers4;Coasy;Comt;Coq5;Csad;Dhcr24;Dnmt1;Fahd1;Galk1;Gart;Gcat;Gda;Gmps;Got2;Gstz1;Gucy1b1;Gys1;Itpk1;Itpkb;Ldhd;Mccc1;Mgll;Ndufb4;Nme2;Nt5c2;Oat;Ocrl;Pfkl;Pfkm;Pgam1;Pigs;Plod3;Prune1;Psph;Rdh12;Rrm1
	mmu05410:Hypertrophic cardiomyopathy	1.90238	-0.82439	-1.90238	0.00152207	0.144203	6	./Project_wg_result1748363634_GSEA/mmu05410.png	mmu05410	http://www.kegg.jp/kegg-bin/show_pathway?mmu05410+13405+22138+11937+20391+24051+20649	6	13405;22138;11937;20391;24051;20649	Atp2a1;Dmd;Sgca;Sgcb;Sntb1;Ttn
	mmu04972:Pancreatic secretion	1.69723	-0.846574	-1.69723	0.00162602	0.151608	4	./Project_wg_result1748363634_GSEA/mmu04972.png	mmu04972	http://www.kegg.jp/kegg-bin/show_pathway?mmu04972+11937+98660	2	11937;98660	Atp1a2;Atp2a1
	mmu00562:Inositol phosphate metabolism	1.70838	-0.934625	-1.70838	0.00327869	0.152863	3	./Project_wg_result1748363634_GSEA/mmu00562.png	mmu00562	http://www.kegg.jp/kegg-bin/show_pathway?mmu00562+320404+217837+320634	3	320404;217837;320634	Itpk1;Itpkb;Ocrl
	mmu05412:Arrhythmogenic right ventricular cardiomyopathy	1.77366	-0.822384	-1.77366	0.00157978	0.135109	5	./Project_wg_result1748363634_GSEA/mmu05412.png	mmu05412	http://www.kegg.jp/kegg-bin/show_pathway?mmu05412+13405+11937+20391+24051+20649	5	13405;11937;20391;24051;20649	Atp2a1;Dmd;Sgca;Sgcb;Sntb1
	mmu05414:Dilated cardiomyopathy	1.78843	-0.738734	-1.78843	0.0075188	0.143878	7	./Project_wg_result1748363634_GSEA/mmu05414.png	mmu05414	http://www.kegg.jp/kegg-bin/show_pathway?mmu05414+13405+22138+11937+20391+24051+20649	6	13405;22138;11937;20391;24051;20649	Atp2a1;Dmd;Sgca;Sgcb;Sntb1;Ttn
	mmu04919:Thyroid hormone signaling pathway	1.81286	-0.72735	-1.81286	0.00144928	0.14377	8	./Project_wg_result1748363634_GSEA/mmu04919.png	mmu04919	http://www.kegg.jp/kegg-bin/show_pathway?mmu04919+18176+18708+18642+15461+11937+98660	6	18176;18708;18642;15461;11937;98660	Atp1a2;Atp2a1;Hras;Nras;Pfkm;Pik3r1
Transcription factor
geneSet	NES	enrichmentScore	normalizedEnrichmentScore	pValue	FDR	size	link	plotPath	leadingEdgeNum	leadingEdgeId	userId
MYCMAX_B	1.97813	0.817278	1.97813	0.00277778	0.403555	5	http://www.broadinstitute.org/gsea/msigdb/cards/MYCMAX_B	./Project_wg_result1748448138_GSEA/MYCMAX_B.png	3	19231;12928;12313	Calm1;Crk;Ptma
ZNF33A_TARGET_GENES	1.72238	0.668744	1.72238	0.0228571	1	6	http://www.broadinstitute.org/gsea/msigdb/cards/ZNF33A_TARGET_GENES	./Project_wg_result1748448138_GSEA/ZNF33A_TARGET_GENES.png	4	26365;14325;56013;12313	Calm1;Ceacam1;Ftl1;Srcin1
ZNF581_TARGET_GENES	1.48261	0.4308	1.48261	0.0830671	1	12	http://www.broadinstitute.org/gsea/msigdb/cards/ZNF581_TARGET_GENES	./Project_wg_result1748448138_GSEA/ZNF581_TARGET_GENES.png	4	12576;19231;20196;78330	Cdkn1b;Ndufv3;Ptma;S100a13
ZBED4_TARGET_GENES	1.41266	0.446339	1.41266	0.113095	1	9	http://www.broadinstitute.org/gsea/msigdb/cards/ZBED4_TARGET_GENES	./Project_wg_result1748448138_GSEA/ZBED4_TARGET_GENES.png	4	67414;17938;231887;67771	Arpc5;Mfn1;Naca;Pdap1
LMTK3_TARGET_GENES	1.35039	0.413813	1.35039	0.121212	1	10	http://www.broadinstitute.org/gsea/msigdb/cards/LMTK3_TARGET_GENES	./Project_wg_result1748448138_GSEA/LMTK3_TARGET_GENES.png	3	26365;67414;252903	Ap1s3;Ceacam1;Mfn1
ZNF134_TARGET_GENES	1.31017	0.254521	1.31017	0.0982659	1	40	http://www.broadinstitute.org/gsea/msigdb/cards/ZNF134_TARGET_GENES	./Project_wg_result1748448138_GSEA/ZNF134_TARGET_GENES.png	14	106639;26365;53382;382097;67414;20196;66659;12313;269589;80890;14998;19344;229906;67771	Acp6;Arpc5;Calm1;Ceacam1;Gm1123;Gtf2b;H2-DMa;Mfn1;Rab5b;S100a13;Sytl1;Trim2;Txnl1;Vmac
CHAMP1_TARGET_GENES	1.31868	0.432548	1.31868	0.151057	1	9	http://www.broadinstitute.org/gsea/msigdb/cards/CHAMP1_TARGET_GENES	./Project_wg_result1748448138_GSEA/CHAMP1_TARGET_GENES.png	3	12653;53382;12313	Calm1;Chgb;Txnl1
NPAT_TARGET_GENES	1.29929	0.393022	1.29929	0.163934	1	11	http://www.broadinstitute.org/gsea/msigdb/cards/NPAT_TARGET_GENES	./Project_wg_result1748448138_GSEA/NPAT_TARGET_GENES.png	3	106639;53382;68043	Eef1akmt1;Txnl1;Vmac
NR1H4_TARGET_GENES	0.532206	0.143583	0.532206	0.989547	0.996421	14	http://www.broadinstitute.org/gsea/msigdb/cards/NR1H4_TARGET_GENES	./Project_wg_result1748448138_GSEA/NR1H4_TARGET_GENES.png	4	71722;68449;20729;20501	Cic;Slc16a1;Spin1;Tbc1d10b
MAX_01	0.496872	0.133575	0.496872	1	0.993685	14	http://www.broadinstitute.org/gsea/msigdb/cards/MAX_01	./Project_wg_result1748448138_GSEA/MAX_01.png	5	19231;30058;80743;107513;67500	Ccar1;Ptma;Ssr1;Timm8a1;Vps16
OCT1_Q5_01	2.15115	-0.82801	-2.15115	0	0.0138429	9	http://www.broadinstitute.org/gsea/msigdb/cards/OCT1_Q5_01	./Project_wg_result1748448138_GSEA/OCT1_Q5_01.png	9	20848;13405;17318;18176;15461;11937;231798;109272;320940	Atp11c;Atp2a1;Dmd;Hras;Lrch4;Mid1;Mybpc1;Nras;Stat3
HOXA4_Q2	2.04825	-0.624696	-2.04825	0	0.0477478	18	http://www.broadinstitute.org/gsea/msigdb/cards/HOXA4_Q2	./Project_wg_result1748448138_GSEA/HOXA4_Q2.png	12	17880;109168;13405;23790;11816;12325;18708;13205;11937;17885;17879;109272	Apoe;Atl3;Atp2a1;Camk2g;Coro1c;Ddx3x;Dmd;Mybpc1;Myh1;Myh11;Myh8;Pik3r1
YTATTTTNR_MEF2_02	2.01051	-0.566659	-2.01051	0	0.0550705	29	http://www.broadinstitute.org/gsea/msigdb/cards/YTATTTTNR_MEF2_02	./Project_wg_result1748448138_GSEA/YTATTTTNR_MEF2_02.png	21	18648;17999;72117;17901;17880;26912;109168;241296;13405;17189;208440;17318;17907;22138;229589;17885;56376;17879;24051;23945;329154	Ankrd44;Atl3;Dip2c;Dmd;Gcat;Lrrc8a;Mb;Mgll;Mid1;Myh1;Myh11;Myh8;Myl1;Mylpf;Naa50;Nedd4;Pdlim5;Pgam1;Prune1;Sgcb;Ttn
CDC5_01	1.9543	-0.606391	-1.9543	0	0.0746311	18	http://www.broadinstitute.org/gsea/msigdb/cards/CDC5_01	./Project_wg_result1748448138_GSEA/CDC5_01.png	12	20848;208440;22589;18176;18708;17907;15461;320404;17885;17879;26569;23945	Atrx;Dip2c;Hras;Itpkb;Mgll;Myh1;Myh8;Mylpf;Nras;Pik3r1;Slc27a4;Stat3
MYB_Q5_01	1.90719	-0.744776	-1.90719	0.00145773	0.0717221	8	http://www.broadinstitute.org/gsea/msigdb/cards/MYB_Q5_01	./Project_wg_result1748448138_GSEA/MYB_Q5_01.png	6	13405;12325;229589;23945;320634;329154	Ankrd44;Camk2g;Dmd;Mgll;Ocrl;Prune1
CTAWWWATA_RSRFC4_Q2	1.89989	-0.547546	-1.89989	0.00264201	0.0720384	23	http://www.broadinstitute.org/gsea/msigdb/cards/CTAWWWATA_RSRFC4_Q2	./Project_wg_result1748448138_GSEA/CTAWWWATA_RSRFC4_Q2.png	20	66395;13627;60595;11754;17901;20853;227937;17929;17880;11426;109168;13405;17189;23790;18708;11937;66146;17885;17879;109272	Actn4;Ahnak;Aoc3;Atl3;Atp2a1;Coro1c;Dmd;Eef1a1;Macf1;Maco1;Mb;Mybpc1;Myh1;Myh11;Myh8;Myl1;Myom1;Pik3r1;Pkp4;Stau1
AREB6_03	1.89848	-0.605358	-1.89848	0.00270636	0.0680966	16	http://www.broadinstitute.org/gsea/msigdb/cards/AREB6_03	./Project_wg_result1748448138_GSEA/AREB6_03.png	12	207214;17880;11426;241296;13405;19155;21957;22138;17885;17879;16897;231798	Dmd;Larp4;Llgl1;Lrch4;Lrrc8a;Macf1;Myh1;Myh11;Myh8;Npepps;Tnnt3;Ttn
SYATTGTG_UNKNOWN	1.89786	-0.626296	-1.89786	0.00423131	0.0641185	15	http://www.broadinstitute.org/gsea/msigdb/cards/SYATTGTG_UNKNOWN	./Project_wg_result1748448138_GSEA/SYATTGTG_UNKNOWN.png	10	17880;72017;17913;17189;208643;12325;18708;13205;17885;17879	Camk2g;Cyb5r1;Ddx3x;Eif4g1;Mb;Myh1;Myh11;Myh8;Myo1c;Pik3r1
OCT1_05	1.89084	-0.683859	-1.89084	0.00145349	0.0651517	11	http://www.broadinstitute.org/gsea/msigdb/cards/OCT1_05	./Project_wg_result1748448138_GSEA/OCT1_05.png	9	17880;20848;13405;17318;210126;11937;17885;17879;109272	Atp2a1;Dmd;Lpp;Mid1;Mybpc1;Myh1;Myh11;Myh8;Stat3
